# Supplementary material for: Transcriptome Analysis Reveals the Defense Mechanism of Cotton against Verticillium dahliae Induced by Hypovirulent Fungus Gibellulopsis nigrescens CEF08111
Source: MDPI journal article supplement (doi:10.3390/ijms24021480), 2023-01-12

### Figure S1

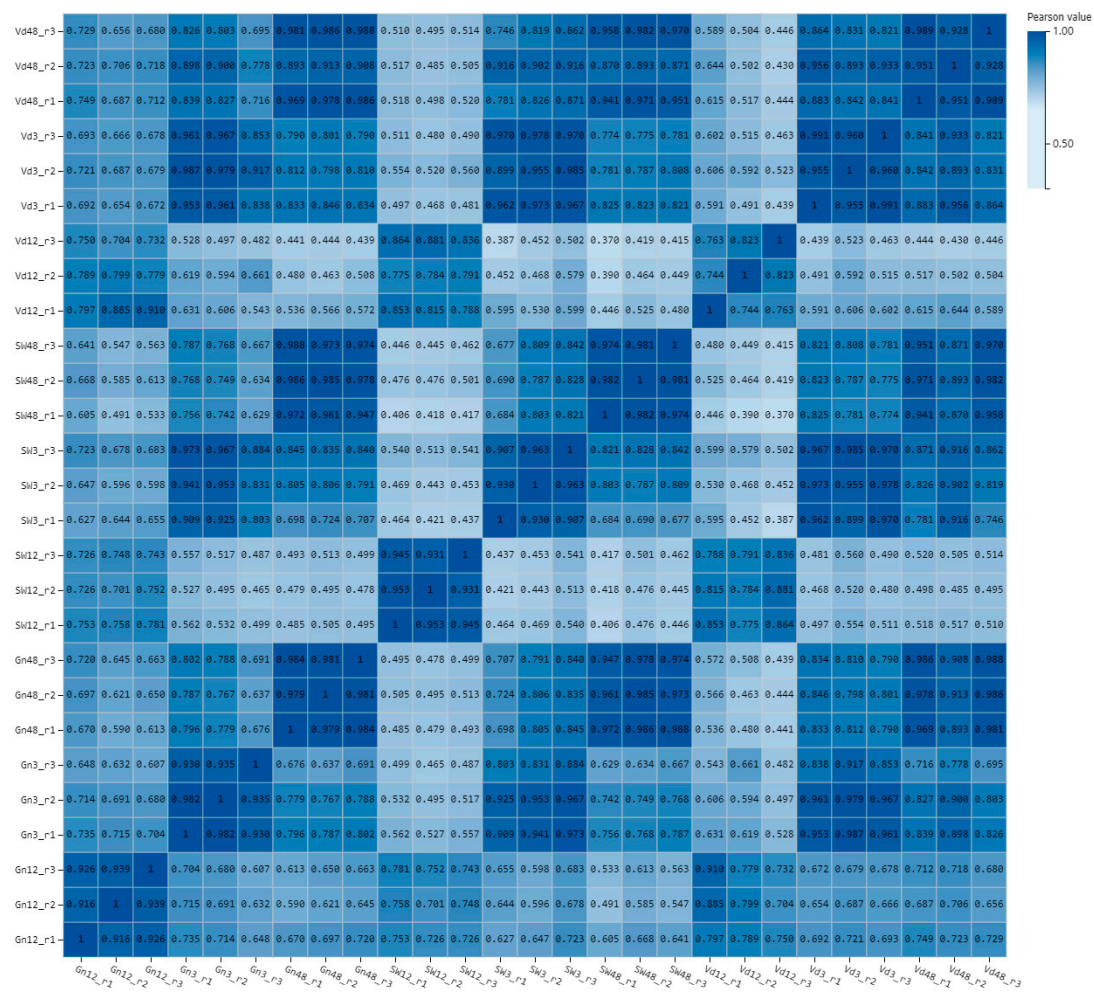

**Figure S2**

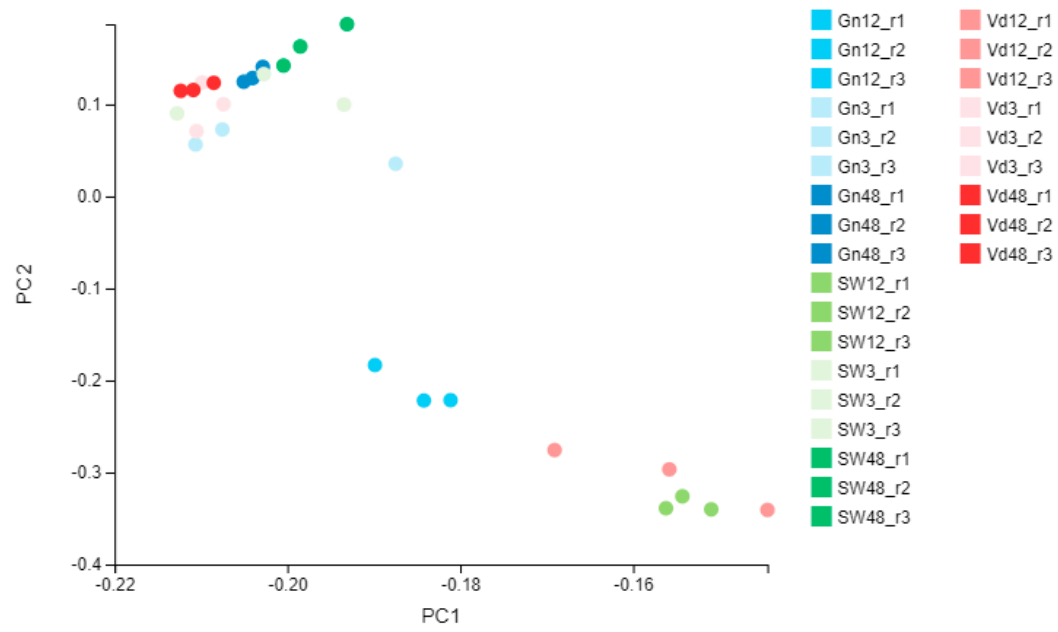

Figure S3

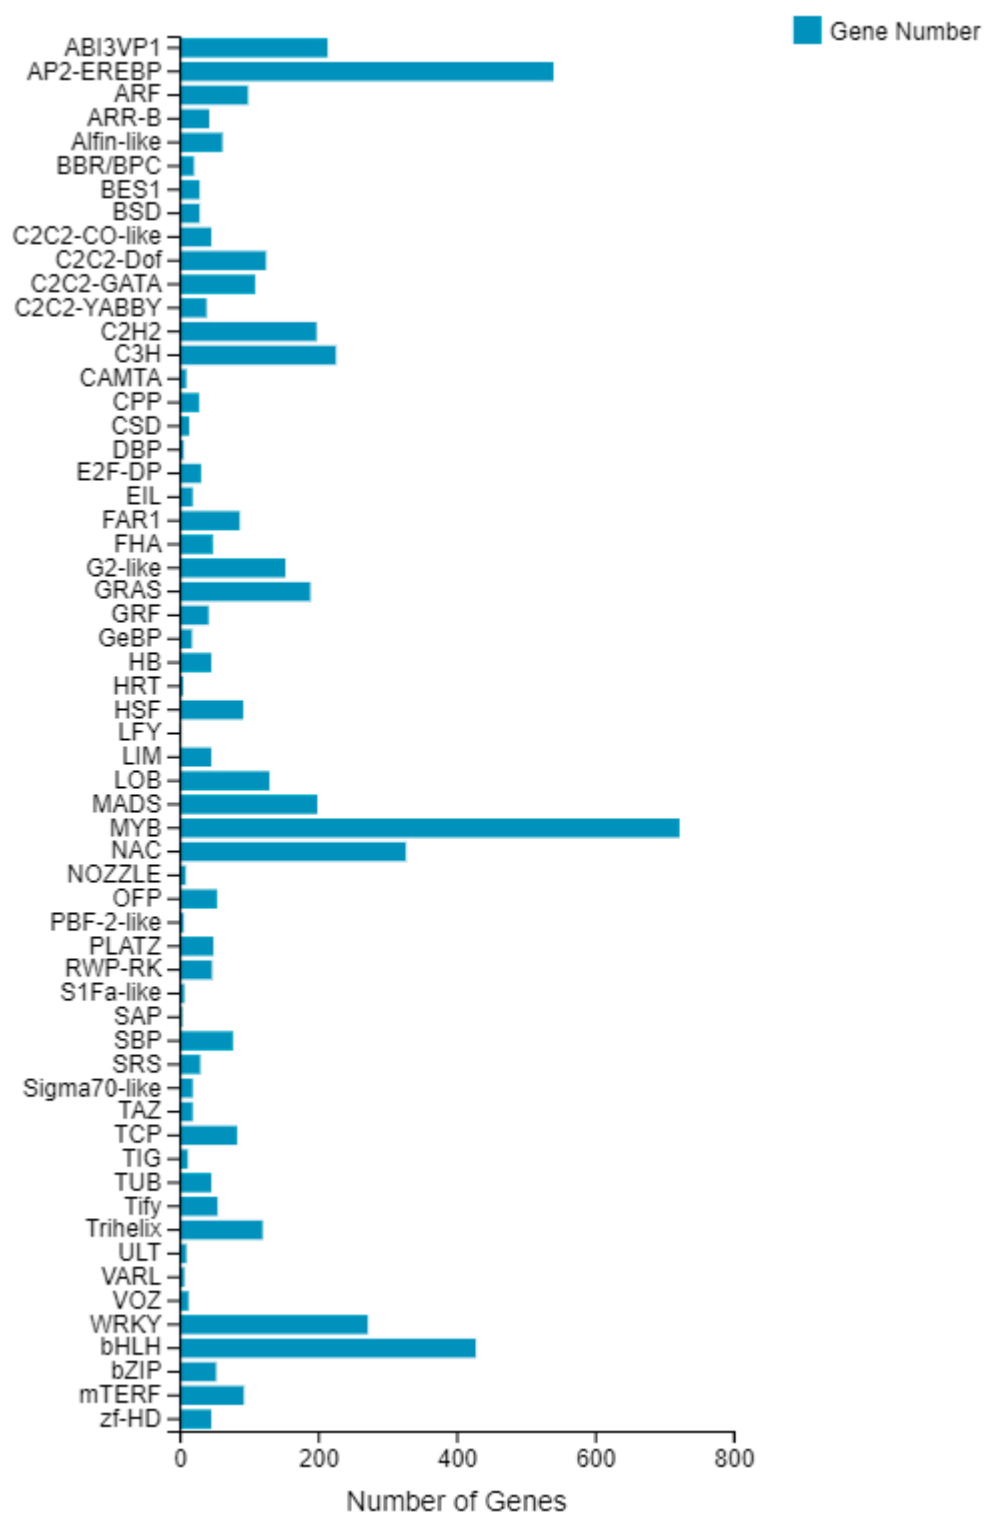

Figure S4

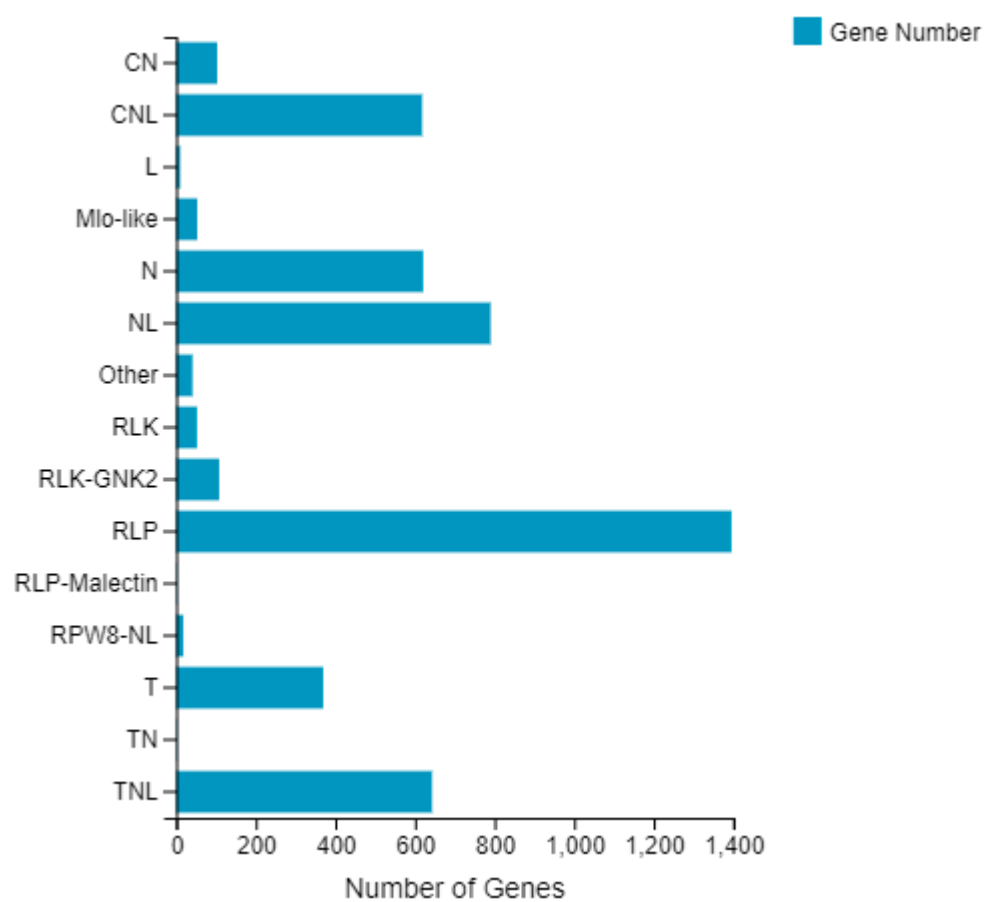

[illegible]

Figure S6

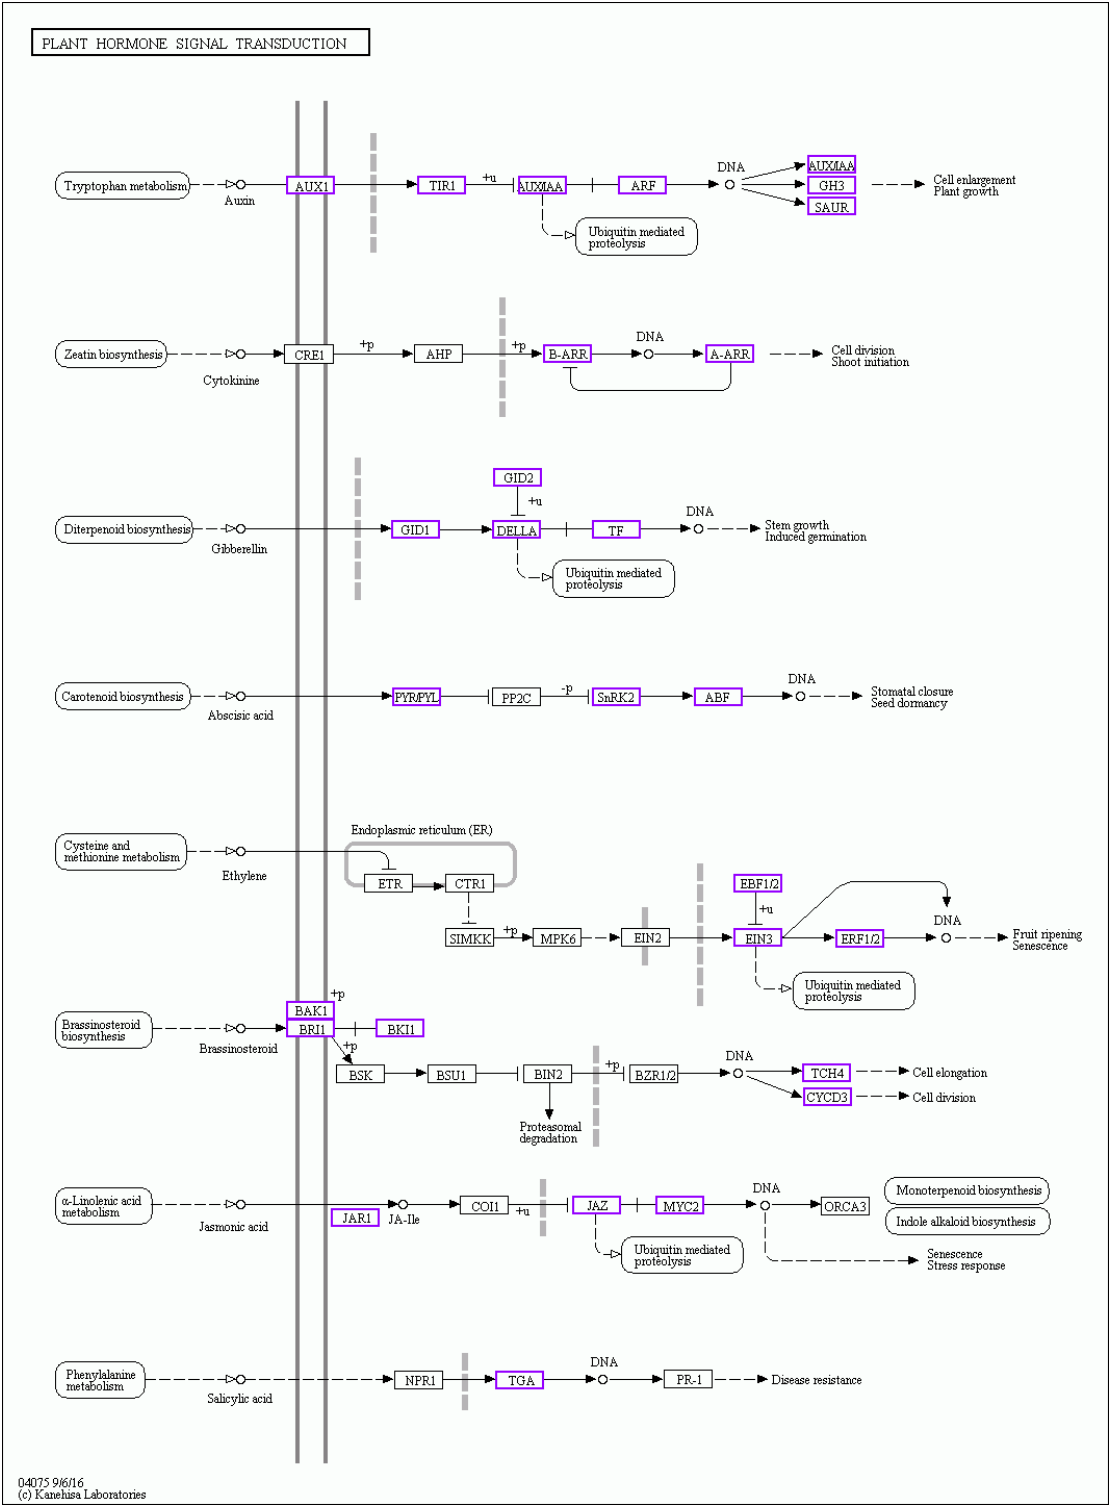

Figure S7

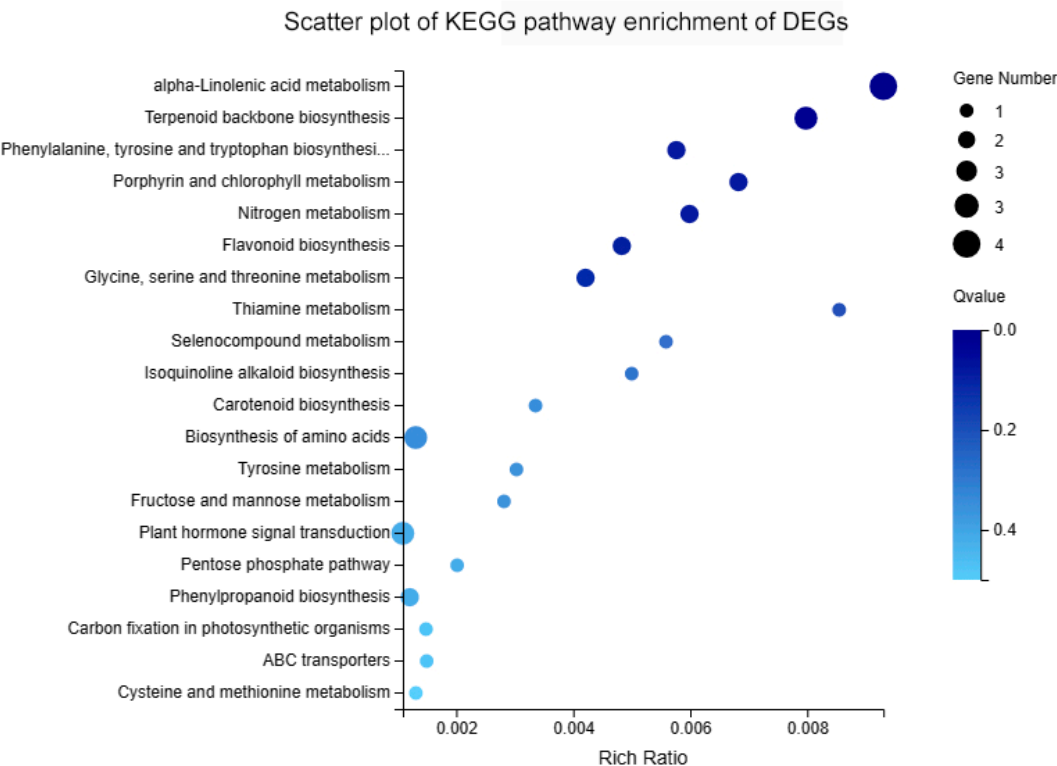

Figure S8

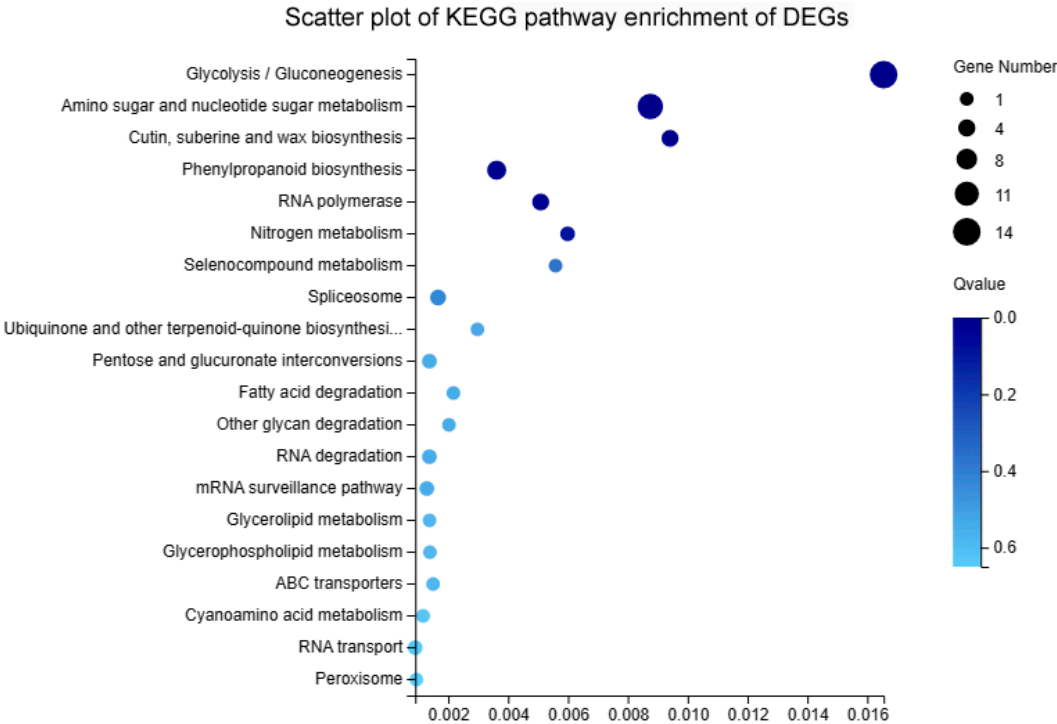

Figure S9

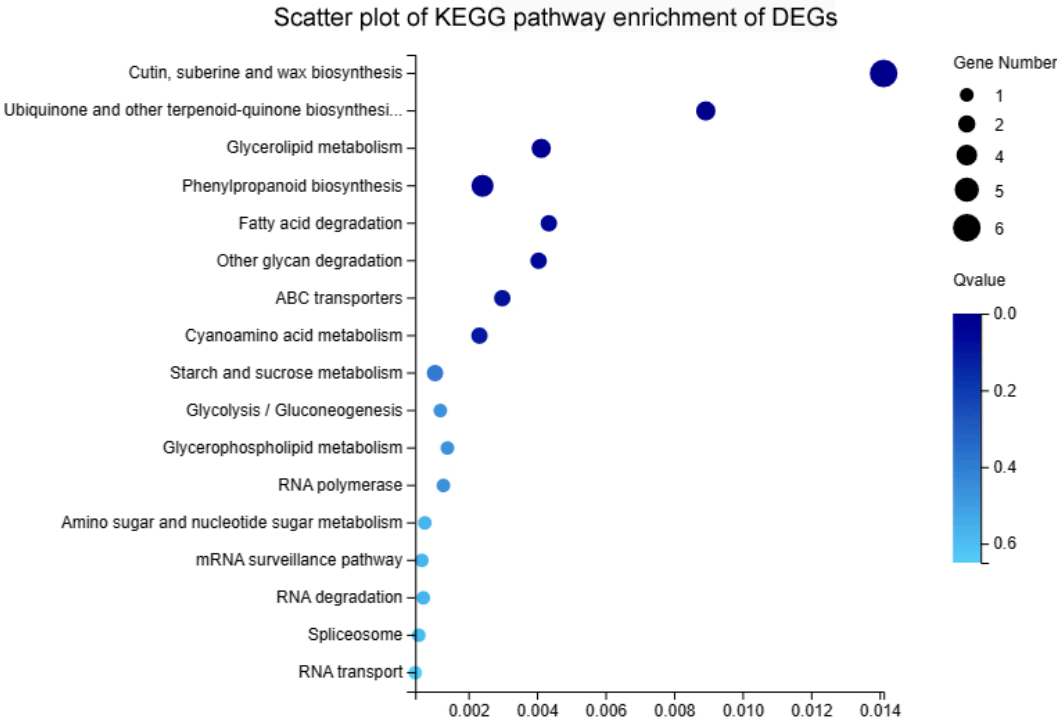

Figure S10

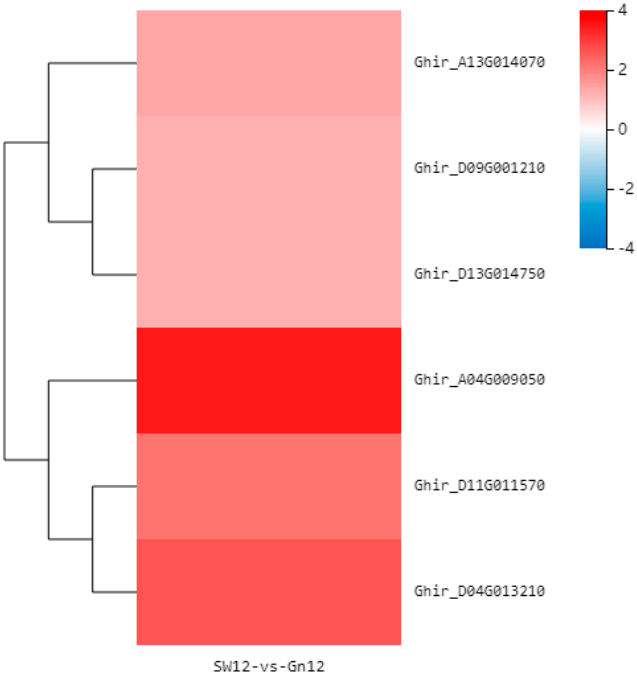

Figure S11

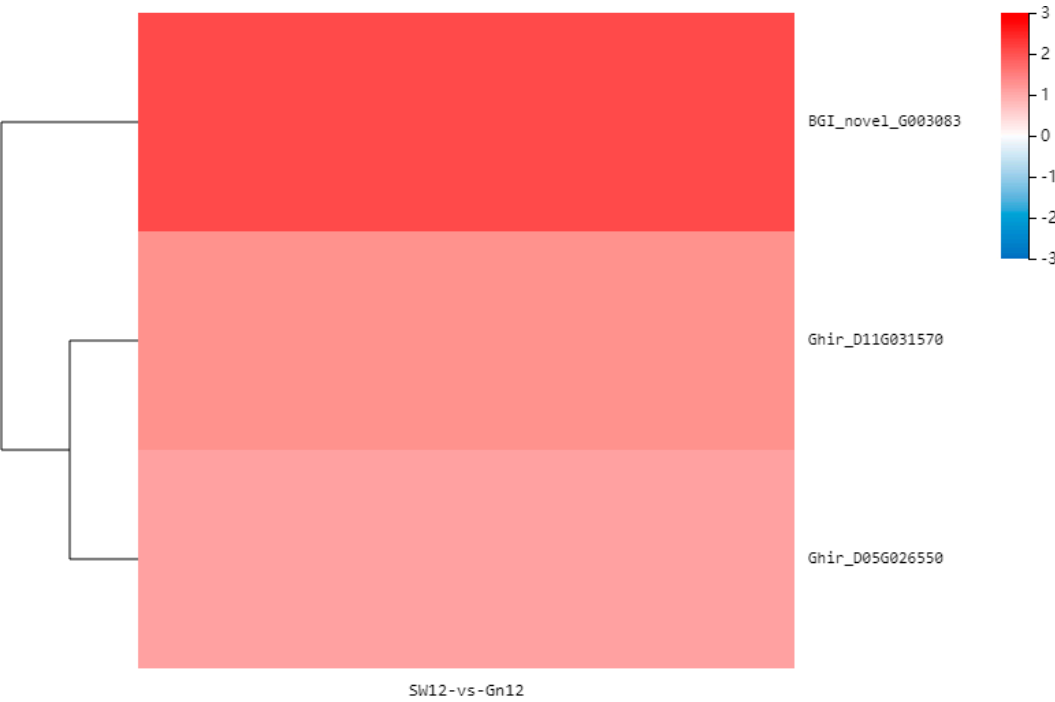

Figure S12

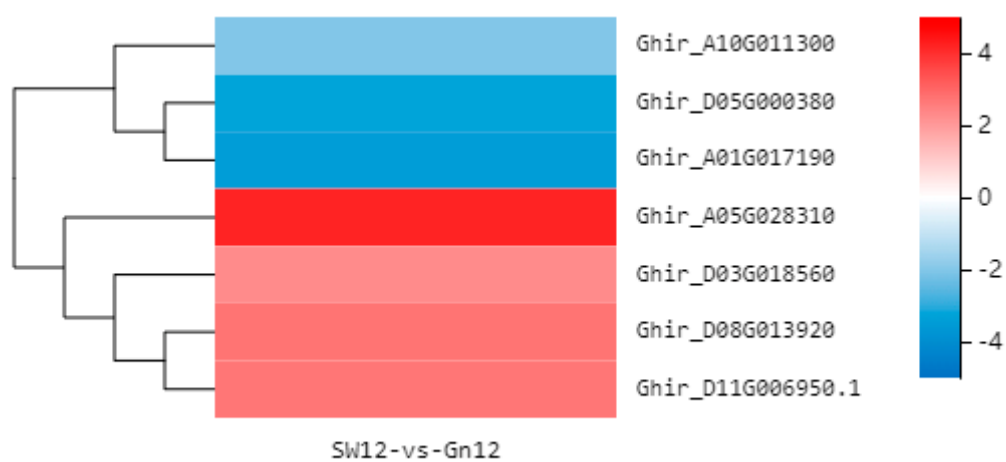

Supplement: s1 [file s1]
