# Supplementary material for: Transcriptome Analysis Reveals the Defense Mechanism of Cotton against Verticillium dahliae Induced by Hypovirulent Fungus Gibellulopsis nigrescens CEF08111
Source: Int J Mol Sci. 2023 Jan 12;24(2):1480. doi: 10.3390/ijms24021480 (PMC9863408; doi:10.3390/ijms24021480)
Supplement: Supplementary file 1 [file ijms-24-01480-s001.zip]

Archive with 14 entries (14 files):
- Supplementary Figures S1-S12.pdf
- Table S1.xlsx
- Table S10.xlsx
- Table S11.xlsx
- Table S12.xlsx
- Table S13. gene expression.xlsx
- Table S2.xlsx
- Table S3.xlsx
- Table S4.xlsx
- Table S5.xlsx
- Table S6.xlsx
- Table S7.xlsx
- Table S8.xlsx
- Table S9.xlsx
