# Supplementary material for: Transcriptome Analysis Reveals the Defense Mechanism of Cotton against Verticillium dahliae Induced by Hypovirulent Fungus Gibellulopsis nigrescens CEF08111
Source: Int J Mol Sci. 2023 Jan 12;24(2):1480. doi: 10.3390/ijms24021480 (PMC9863408; doi:10.3390/ijms24021480)
Supplement: Supplementary file 1 [file ijms-24-01480-s001.zip › Table S1.xlsx]

## Sheet: Sheet1
Table S1 Sequencing quality statistics table
Sample	Total Raw Reads (M)	Total Clean Reads (M)	Total Clean Bases(Gb)	Clean Reads Q20(%)	Clean Reads Q30(%)	Clean Reads Ratio(%)
Gn3_1	43.82	42.34	6.35	95.81	89.83	96.61
Gn3_2	43.82	42.19	6.33	95.73	89.65	96.27
Gn3_3	43.82	42.28	6.34	95.66	89.5	96.48
Vd3_1	42.33	41.23	6.18	96.35	90.91	97.4
Vd3_2	43.82	42.1	6.32	96.33	90.88	96.08
Vd3_3	43.82	42.34	6.35	96.39	91.06	96.62
SW3_1	45.57	43	6.45	96.73	91.71	94.34
SW3_2	43.82	42.65	6.4	96.5	91.13	97.32
SW3_3	43.82	42.68	6.4	96.52	91.16	97.4
Gn12_1	45.57	43.22	6.48	95.78	89.81	94.83
Gn12_2	42.22	40.98	6.15	96.52	91.3	97.05
Gn12_3	43.82	42.55	6.38	96.53	91.34	97.11
Vd12_1	43.82	42.48	6.37	96.47	91.23	96.94
Vd12_2	43.82	42.56	6.38	96.45	91.16	97.12
Vd12_3	43.82	42.59	6.39	96.46	91.15	97.19
SW12_1	41.37	40.34	6.05	96.46	91.04	97.51
SW12_2	43.82	42.72	6.41	96.62	91.37	97.49
SW12_3	43.82	42.67	6.4	96.61	91.41	97.37
Gn48_1	40.66	39.45	5.92	96.42	91.07	97.03
Gn48_2	43.82	42.53	6.38	96.44	91.15	97.05
Gn48_3	43.82	42.91	6.44	96.31	90.8	97.91
Vd48_1	43.82	42.4	6.36	96.44	91.18	96.75
Vd48_2	43.82	42.49	6.37	96.28	90.64	96.97
Vd48_3	43.82	42.77	6.42	96.52	91.16	97.61
SW48_1	43.82	42.66	6.4	96.47	91.12	97.34
SW48_2	43.82	42.67	6.4	96.22	90.49	97.37
SW48_3	43.82	42.43	6.36	96.55	91.28	96.83
