# Supplementary material for: Transcriptome Analysis Reveals the Defense Mechanism of Cotton against Verticillium dahliae Induced by Hypovirulent Fungus Gibellulopsis nigrescens CEF08111
Source: Int J Mol Sci. 2023 Jan 12;24(2):1480. doi: 10.3390/ijms24021480 (PMC9863408; doi:10.3390/ijms24021480)
Supplement: Supplementary file 1 [file ijms-24-01480-s001.zip › Table S2.xlsx]

## Sheet: Sheet1
Table S2 Overview of novel transcripts
Total Novel Transcript	Coding Transcript	Novel Isoform	Novel Gene
36551	36551	28907	7644
