# Supplementary material for: Transcriptome Analysis Reveals the Defense Mechanism of Cotton against Verticillium dahliae Induced by Hypovirulent Fungus Gibellulopsis nigrescens CEF08111
Source: Int J Mol Sci. 2023 Jan 12;24(2):1480. doi: 10.3390/ijms24021480 (PMC9863408; doi:10.3390/ijms24021480)
Supplement: Supplementary file 1 [file ijms-24-01480-s001.zip › Table S3.xlsx]

## Sheet: TS3
Gene ID	Family	Included Domain	Excluded Domain	DB Link
Ghir_D03G006550	MYB	Myb_DNA-binding	ARID,Response_reg,SNF2_N	http://plntfdb.bio.uni-potsdam.de/v3.0/fam_mem.php?family_id=MYB
Ghir_D13G015820	NAC	NAM	-	http://plntfdb.bio.uni-potsdam.de/v3.0/fam_mem.php?family_id=NAC
Ghir_A05G031820	G2-like	G2-like	Response_reg	http://plntfdb.bio.uni-potsdam.de/v3.0/fam_mem.php?family_id=G2-like
Ghir_D11G021500	GRAS	GRAS	-	http://plntfdb.bio.uni-potsdam.de/v3.0/fam_mem.php?family_id=GRAS
Ghir_D09G003440	MYB	Myb_DNA-binding	ARID,Response_reg,SNF2_N	http://plntfdb.bio.uni-potsdam.de/v3.0/fam_mem.php?family_id=MYB
Ghir_A04G011650	MADS	SRF-TF	-	http://plntfdb.bio.uni-potsdam.de/v3.0/fam_mem.php?family_id=MADS
Ghir_A02G012440	MADS	SRF-TF	-	http://plntfdb.bio.uni-potsdam.de/v3.0/fam_mem.php?family_id=MADS
Ghir_D02G019650.2	TCP	TCP	-	http://plntfdb.bio.uni-potsdam.de/v3.0/fam_mem.php?family_id=TCP
Ghir_A05G032920	TAZ	zf-TAZ	PHD	http://plntfdb.bio.uni-potsdam.de/v3.0/fam_mem.php?family_id=TAZ
Ghir_D05G026990.1	Tify	tify	GATA	http://plntfdb.bio.uni-potsdam.de/v3.0/fam_mem.php?family_id=Tify
Ghir_D12G012280	VARL	VARL	-	http://plntfdb.bio.uni-potsdam.de/v3.0/fam_mem.php?family_id=VARL
Ghir_A03G010220	FAR1	FAR1	-	http://plntfdb.bio.uni-potsdam.de/v3.0/fam_mem.php?family_id=FAR1
Ghir_D12G022650.1	C2C2-GATA	GATA	-	http://plntfdb.bio.uni-potsdam.de/v3.0/fam_mem.php?family_id=C2C2-GATA
Ghir_A05G037850	MYB	Myb_DNA-binding	ARID,Response_reg,SNF2_N	http://plntfdb.bio.uni-potsdam.de/v3.0/fam_mem.php?family_id=MYB
BGI_novel_G003486	MYB	Myb_DNA-binding	ARID,Response_reg,SNF2_N	http://plntfdb.bio.uni-potsdam.de/v3.0/fam_mem.php?family_id=MYB
Ghir_D08G014050	MYB	Myb_DNA-binding	ARID,Response_reg,SNF2_N	http://plntfdb.bio.uni-potsdam.de/v3.0/fam_mem.php?family_id=MYB
Ghir_A11G011020	ABI3VP1	B3	AP2,Auxin_resp	http://plntfdb.bio.uni-potsdam.de/v3.0/fam_mem.php?family_id=ABI3VP1
Ghir_D13G003130	SRS	DUF702	-	http://plntfdb.bio.uni-potsdam.de/v3.0/fam_mem.php?family_id=SRS
Ghir_D08G023910	Sigma70-like	Sigma70_r2,Sigma70_r3,Sigma70_r4	-	http://plntfdb.bio.uni-potsdam.de/v3.0/fam_mem.php?family_id=Sigma70-like
Ghir_D11G014000	NAC	NAM	-	http://plntfdb.bio.uni-potsdam.de/v3.0/fam_mem.php?family_id=NAC
Ghir_A12G007000.1	ABI3VP1	B3	AP2,Auxin_resp	http://plntfdb.bio.uni-potsdam.de/v3.0/fam_mem.php?family_id=ABI3VP1
Ghir_D13G019160	bHLH	HLH	-	http://plntfdb.bio.uni-potsdam.de/v3.0/fam_mem.php?family_id=bHLH
Ghir_A05G002820.1	NAC	NAM	-	http://plntfdb.bio.uni-potsdam.de/v3.0/fam_mem.php?family_id=NAC
Ghir_A07G004760	C2H2	zf-C2H2	PHD	http://plntfdb.bio.uni-potsdam.de/v3.0/fam_mem.php?family_id=C2H2
Ghir_A08G012250	MYB	Myb_DNA-binding	ARID,Response_reg,SNF2_N	http://plntfdb.bio.uni-potsdam.de/v3.0/fam_mem.php?family_id=MYB
Ghir_A09G026520	OFP	Ovate	-	http://plntfdb.bio.uni-potsdam.de/v3.0/fam_mem.php?family_id=OFP
Ghir_A12G010410	AP2-EREBP	AP2	-	http://plntfdb.bio.uni-potsdam.de/v3.0/fam_mem.php?family_id=AP2-EREBP
Ghir_A05G021470	bHLH	HLH	-	http://plntfdb.bio.uni-potsdam.de/v3.0/fam_mem.php?family_id=bHLH
Ghir_D10G010320.1	AP2-EREBP	AP2	-	http://plntfdb.bio.uni-potsdam.de/v3.0/fam_mem.php?family_id=AP2-EREBP
Ghir_A09G011460	C2H2	zf-C2H2	PHD	http://plntfdb.bio.uni-potsdam.de/v3.0/fam_mem.php?family_id=C2H2
Ghir_D05G020430	MYB	Myb_DNA-binding	ARID,Response_reg,SNF2_N	http://plntfdb.bio.uni-potsdam.de/v3.0/fam_mem.php?family_id=MYB
Ghir_A10G006590.1	NAC	NAM	-	http://plntfdb.bio.uni-potsdam.de/v3.0/fam_mem.php?family_id=NAC
Ghir_D06G002140	bHLH	HLH	-	http://plntfdb.bio.uni-potsdam.de/v3.0/fam_mem.php?family_id=bHLH
Ghir_D06G008580	ARF	Auxin_resp	-	http://plntfdb.bio.uni-potsdam.de/v3.0/fam_mem.php?family_id=ARF
Ghir_D12G003480	MYB	Myb_DNA-binding	ARID,Response_reg,SNF2_N	http://plntfdb.bio.uni-potsdam.de/v3.0/fam_mem.php?family_id=MYB
Ghir_D06G016050	Trihelix	trihelix	-	http://plntfdb.bio.uni-potsdam.de/v3.0/fam_mem.php?family_id=Trihelix
Ghir_D03G014270	MYB	Myb_DNA-binding	ARID,Response_reg,SNF2_N	http://plntfdb.bio.uni-potsdam.de/v3.0/fam_mem.php?family_id=MYB
Ghir_A08G016250	G2-like	G2-like	Response_reg	http://plntfdb.bio.uni-potsdam.de/v3.0/fam_mem.php?family_id=G2-like
Ghir_D13G023600	C3H	zf-CCCH	PHD,SNF2_N,zf-C2H2	http://plntfdb.bio.uni-potsdam.de/v3.0/fam_mem.php?family_id=C3H
Ghir_A02G006610	AP2-EREBP	AP2	-	http://plntfdb.bio.uni-potsdam.de/v3.0/fam_mem.php?family_id=AP2-EREBP
Ghir_A11G014130	G2-like	G2-like	Response_reg	http://plntfdb.bio.uni-potsdam.de/v3.0/fam_mem.php?family_id=G2-like
Ghir_D11G004000	C3H	zf-CCCH	PHD,SNF2_N,zf-C2H2	http://plntfdb.bio.uni-potsdam.de/v3.0/fam_mem.php?family_id=C3H
Ghir_D04G018660	MADS	SRF-TF	-	http://plntfdb.bio.uni-potsdam.de/v3.0/fam_mem.php?family_id=MADS
Ghir_A12G008270	ARF	Auxin_resp	-	http://plntfdb.bio.uni-potsdam.de/v3.0/fam_mem.php?family_id=ARF
Ghir_D09G019440	AP2-EREBP	AP2	-	http://plntfdb.bio.uni-potsdam.de/v3.0/fam_mem.php?family_id=AP2-EREBP
Ghir_A13G024290	EIL	EIN3	-	http://plntfdb.bio.uni-potsdam.de/v3.0/fam_mem.php?family_id=EIL
Ghir_A09G003570	MYB	Myb_DNA-binding	ARID,Response_reg,SNF2_N	http://plntfdb.bio.uni-potsdam.de/v3.0/fam_mem.php?family_id=MYB
Ghir_D07G016090	AP2-EREBP	AP2	-	http://plntfdb.bio.uni-potsdam.de/v3.0/fam_mem.php?family_id=AP2-EREBP
Ghir_A10G005580	C2H2	zf-C2H2	PHD	http://plntfdb.bio.uni-potsdam.de/v3.0/fam_mem.php?family_id=C2H2
Ghir_A13G007300	MYB	Myb_DNA-binding	ARID,Response_reg,SNF2_N	http://plntfdb.bio.uni-potsdam.de/v3.0/fam_mem.php?family_id=MYB
Ghir_D09G012730.3	C3H	zf-CCCH	PHD,SNF2_N,zf-C2H2	http://plntfdb.bio.uni-potsdam.de/v3.0/fam_mem.php?family_id=C3H
Ghir_A03G017170	C2H2	zf-C2H2	PHD	http://plntfdb.bio.uni-potsdam.de/v3.0/fam_mem.php?family_id=C2H2
Ghir_D02G012310	C2H2	zf-C2H2	PHD	http://plntfdb.bio.uni-potsdam.de/v3.0/fam_mem.php?family_id=C2H2
Ghir_D11G004830	MYB	Myb_DNA-binding	ARID,Response_reg,SNF2_N	http://plntfdb.bio.uni-potsdam.de/v3.0/fam_mem.php?family_id=MYB
Ghir_A02G004860	C3H	zf-CCCH	PHD,SNF2_N,zf-C2H2	http://plntfdb.bio.uni-potsdam.de/v3.0/fam_mem.php?family_id=C3H
Ghir_D11G030330	MYB	Myb_DNA-binding	ARID,Response_reg,SNF2_N	http://plntfdb.bio.uni-potsdam.de/v3.0/fam_mem.php?family_id=MYB
Ghir_A02G000070	GRAS	GRAS	-	http://plntfdb.bio.uni-potsdam.de/v3.0/fam_mem.php?family_id=GRAS
Ghir_A07G002050	Trihelix	trihelix	-	http://plntfdb.bio.uni-potsdam.de/v3.0/fam_mem.php?family_id=Trihelix
Ghir_D06G019890	MYB	Myb_DNA-binding	ARID,Response_reg,SNF2_N	http://plntfdb.bio.uni-potsdam.de/v3.0/fam_mem.php?family_id=MYB
Ghir_A06G006880	ABI3VP1	B3	AP2,Auxin_resp	http://plntfdb.bio.uni-potsdam.de/v3.0/fam_mem.php?family_id=ABI3VP1
Ghir_D13G024910	C2H2	zf-C2H2	PHD	http://plntfdb.bio.uni-potsdam.de/v3.0/fam_mem.php?family_id=C2H2
Ghir_A11G011170	SBP	SBP	-	http://plntfdb.bio.uni-potsdam.de/v3.0/fam_mem.php?family_id=SBP
Ghir_D10G005660	MADS	SRF-TF	-	http://plntfdb.bio.uni-potsdam.de/v3.0/fam_mem.php?family_id=MADS
Ghir_A06G012270	EIL	EIN3	-	http://plntfdb.bio.uni-potsdam.de/v3.0/fam_mem.php?family_id=EIL
Ghir_D05G007790	ARF	Auxin_resp	-	http://plntfdb.bio.uni-potsdam.de/v3.0/fam_mem.php?family_id=ARF
Ghir_A12G025690	Trihelix	trihelix	-	http://plntfdb.bio.uni-potsdam.de/v3.0/fam_mem.php?family_id=Trihelix
Ghir_D03G002940	GRAS	GRAS	-	http://plntfdb.bio.uni-potsdam.de/v3.0/fam_mem.php?family_id=GRAS
Ghir_A06G020190	Trihelix	trihelix	-	http://plntfdb.bio.uni-potsdam.de/v3.0/fam_mem.php?family_id=Trihelix
Ghir_A13G012960	MYB	Myb_DNA-binding	ARID,Response_reg,SNF2_N	http://plntfdb.bio.uni-potsdam.de/v3.0/fam_mem.php?family_id=MYB
Ghir_A07G022870	AP2-EREBP	AP2	-	http://plntfdb.bio.uni-potsdam.de/v3.0/fam_mem.php?family_id=AP2-EREBP
Ghir_A05G010370	EIL	EIN3	-	http://plntfdb.bio.uni-potsdam.de/v3.0/fam_mem.php?family_id=EIL
Ghir_D08G005540	C2C2-CO-like	CCT,zf-B_box	GATA,PLATZ	http://plntfdb.bio.uni-potsdam.de/v3.0/fam_mem.php?family_id=C2C2-CO-like
Ghir_D13G006510	MADS	SRF-TF	-	http://plntfdb.bio.uni-potsdam.de/v3.0/fam_mem.php?family_id=MADS
BGI_novel_G005732	MYB	Myb_DNA-binding	ARID,Response_reg,SNF2_N	http://plntfdb.bio.uni-potsdam.de/v3.0/fam_mem.php?family_id=MYB
Ghir_A02G007610.1	NAC	NAM	-	http://plntfdb.bio.uni-potsdam.de/v3.0/fam_mem.php?family_id=NAC
Ghir_D07G025060	bHLH	HLH	-	http://plntfdb.bio.uni-potsdam.de/v3.0/fam_mem.php?family_id=bHLH
Ghir_D12G005610	MADS	SRF-TF	-	http://plntfdb.bio.uni-potsdam.de/v3.0/fam_mem.php?family_id=MADS
Ghir_A09G017110	MYB	Myb_DNA-binding	ARID,Response_reg,SNF2_N	http://plntfdb.bio.uni-potsdam.de/v3.0/fam_mem.php?family_id=MYB
Ghir_A08G019680	bZIP	bZIP_1,bZIP_2,bZIP_Maf	HLH	http://plntfdb.bio.uni-potsdam.de/v3.0/fam_mem.php?family_id=bZIP
Ghir_D01G012420	C2C2-GATA	GATA	-	http://plntfdb.bio.uni-potsdam.de/v3.0/fam_mem.php?family_id=C2C2-GATA
Ghir_A05G007390	SRS	DUF702	-	http://plntfdb.bio.uni-potsdam.de/v3.0/fam_mem.php?family_id=SRS
Ghir_D12G011180	LOB	DUF260	-	http://plntfdb.bio.uni-potsdam.de/v3.0/fam_mem.php?family_id=LOB
Ghir_D12G015340	AP2-EREBP	AP2	-	http://plntfdb.bio.uni-potsdam.de/v3.0/fam_mem.php?family_id=AP2-EREBP
Ghir_A08G013170	bHLH	HLH	-	http://plntfdb.bio.uni-potsdam.de/v3.0/fam_mem.php?family_id=bHLH
Ghir_A01G014970.1	Trihelix	trihelix	-	http://plntfdb.bio.uni-potsdam.de/v3.0/fam_mem.php?family_id=Trihelix
Ghir_D07G009430.1	C3H	zf-CCCH	PHD,SNF2_N,zf-C2H2	http://plntfdb.bio.uni-potsdam.de/v3.0/fam_mem.php?family_id=C3H
Ghir_A06G014450	NAC	NAM	-	http://plntfdb.bio.uni-potsdam.de/v3.0/fam_mem.php?family_id=NAC
Ghir_A08G022250	G2-like	G2-like	Response_reg	http://plntfdb.bio.uni-potsdam.de/v3.0/fam_mem.php?family_id=G2-like
Ghir_A11G029910	bHLH	HLH	-	http://plntfdb.bio.uni-potsdam.de/v3.0/fam_mem.php?family_id=bHLH
Ghir_A09G025530	WRKY	WRKY	-	http://plntfdb.bio.uni-potsdam.de/v3.0/fam_mem.php?family_id=WRKY
Ghir_D07G014240	bHLH	HLH	-	http://plntfdb.bio.uni-potsdam.de/v3.0/fam_mem.php?family_id=bHLH
Ghir_D02G018400.1	VOZ	VOZ	-	http://plntfdb.bio.uni-potsdam.de/v3.0/fam_mem.php?family_id=VOZ
Ghir_D08G017030	bZIP	bZIP_1,bZIP_2,bZIP_Maf	HLH	http://plntfdb.bio.uni-potsdam.de/v3.0/fam_mem.php?family_id=bZIP
Ghir_D01G012800	MADS	SRF-TF	-	http://plntfdb.bio.uni-potsdam.de/v3.0/fam_mem.php?family_id=MADS
Ghir_D06G008810	AP2-EREBP	AP2	-	http://plntfdb.bio.uni-potsdam.de/v3.0/fam_mem.php?family_id=AP2-EREBP
Ghir_A10G005520	MYB	Myb_DNA-binding	ARID,Response_reg,SNF2_N	http://plntfdb.bio.uni-potsdam.de/v3.0/fam_mem.php?family_id=MYB
Ghir_A05G021840	HB	Homeobox,KNOX1,KNOX2	-	http://plntfdb.bio.uni-potsdam.de/v3.0/fam_mem.php?family_id=HB
Ghir_D09G011000	C2H2	zf-C2H2	PHD	http://plntfdb.bio.uni-potsdam.de/v3.0/fam_mem.php?family_id=C2H2
Ghir_A08G016970	LIM	LIM	-	http://plntfdb.bio.uni-potsdam.de/v3.0/fam_mem.php?family_id=LIM
Ghir_A09G002920	MYB	Myb_DNA-binding	ARID,Response_reg,SNF2_N	http://plntfdb.bio.uni-potsdam.de/v3.0/fam_mem.php?family_id=MYB
Ghir_D11G008470	C2H2	zf-C2H2	PHD	http://plntfdb.bio.uni-potsdam.de/v3.0/fam_mem.php?family_id=C2H2
Ghir_D05G034160	MADS	SRF-TF	-	http://plntfdb.bio.uni-potsdam.de/v3.0/fam_mem.php?family_id=MADS
Ghir_A07G008670	GRAS	GRAS	-	http://plntfdb.bio.uni-potsdam.de/v3.0/fam_mem.php?family_id=GRAS
Ghir_A08G009480	PLATZ	PLATZ	-	http://plntfdb.bio.uni-potsdam.de/v3.0/fam_mem.php?family_id=PLATZ
Ghir_D03G001390	C2C2-GATA	GATA	-	http://plntfdb.bio.uni-potsdam.de/v3.0/fam_mem.php?family_id=C2C2-GATA
Ghir_A06G017700.1	LIM	LIM	-	http://plntfdb.bio.uni-potsdam.de/v3.0/fam_mem.php?family_id=LIM
Ghir_D06G004280	ARF	Auxin_resp	-	http://plntfdb.bio.uni-potsdam.de/v3.0/fam_mem.php?family_id=ARF
Ghir_D05G004250	Alfin-like	Alfin-like	DDT,Homeobox,JmjC,JmjN	http://plntfdb.bio.uni-potsdam.de/v3.0/fam_mem.php?family_id=Alfin-like
Ghir_A05G042270	C2H2	zf-C2H2	PHD	http://plntfdb.bio.uni-potsdam.de/v3.0/fam_mem.php?family_id=C2H2
Ghir_A06G012530	NAC	NAM	-	http://plntfdb.bio.uni-potsdam.de/v3.0/fam_mem.php?family_id=NAC
Ghir_A01G008720	MYB	Myb_DNA-binding	ARID,Response_reg,SNF2_N	http://plntfdb.bio.uni-potsdam.de/v3.0/fam_mem.php?family_id=MYB
Ghir_A11G003300	bHLH	HLH	-	http://plntfdb.bio.uni-potsdam.de/v3.0/fam_mem.php?family_id=bHLH
Ghir_D11G021780	AP2-EREBP	AP2	-	http://plntfdb.bio.uni-potsdam.de/v3.0/fam_mem.php?family_id=AP2-EREBP
Ghir_A08G014560	C2C2-GATA	GATA	-	http://plntfdb.bio.uni-potsdam.de/v3.0/fam_mem.php?family_id=C2C2-GATA
Ghir_A12G007070	C2C2-Dof	zf-Dof	-	http://plntfdb.bio.uni-potsdam.de/v3.0/fam_mem.php?family_id=C2C2-Dof
Ghir_D07G005780.1	Trihelix	trihelix	-	http://plntfdb.bio.uni-potsdam.de/v3.0/fam_mem.php?family_id=Trihelix
Ghir_D06G023610	G2-like	G2-like	Response_reg	http://plntfdb.bio.uni-potsdam.de/v3.0/fam_mem.php?family_id=G2-like
Ghir_A11G033080	MYB	Myb_DNA-binding	ARID,Response_reg,SNF2_N	http://plntfdb.bio.uni-potsdam.de/v3.0/fam_mem.php?family_id=MYB
Ghir_A10G003360	G2-like	G2-like	Response_reg	http://plntfdb.bio.uni-potsdam.de/v3.0/fam_mem.php?family_id=G2-like
Ghir_A08G012900	MYB	Myb_DNA-binding	ARID,Response_reg,SNF2_N	http://plntfdb.bio.uni-potsdam.de/v3.0/fam_mem.php?family_id=MYB
Ghir_A11G021890	zf-HD	ZF-HD_dimer	-	http://plntfdb.bio.uni-potsdam.de/v3.0/fam_mem.php?family_id=zf-HD
Ghir_D13G019380	C2C2-GATA	GATA	-	http://plntfdb.bio.uni-potsdam.de/v3.0/fam_mem.php?family_id=C2C2-GATA
Ghir_A05G003890	Tify	tify	GATA	http://plntfdb.bio.uni-potsdam.de/v3.0/fam_mem.php?family_id=Tify
Ghir_D03G001630	GRAS	GRAS	-	http://plntfdb.bio.uni-potsdam.de/v3.0/fam_mem.php?family_id=GRAS
Ghir_D06G002850	bHLH	HLH	-	http://plntfdb.bio.uni-potsdam.de/v3.0/fam_mem.php?family_id=bHLH
Ghir_A05G039220	RWP-RK	RWP-RK	-	http://plntfdb.bio.uni-potsdam.de/v3.0/fam_mem.php?family_id=RWP-RK
Ghir_D03G001340	TUB	Tub	-	http://plntfdb.bio.uni-potsdam.de/v3.0/fam_mem.php?family_id=TUB
Ghir_A07G019040	MYB	Myb_DNA-binding	ARID,Response_reg,SNF2_N	http://plntfdb.bio.uni-potsdam.de/v3.0/fam_mem.php?family_id=MYB
Ghir_A10G000370.1	MYB	Myb_DNA-binding	ARID,Response_reg,SNF2_N	http://plntfdb.bio.uni-potsdam.de/v3.0/fam_mem.php?family_id=MYB
Ghir_D09G023630	MYB	Myb_DNA-binding	ARID,Response_reg,SNF2_N	http://plntfdb.bio.uni-potsdam.de/v3.0/fam_mem.php?family_id=MYB
Ghir_D05G012400.1	C2H2	zf-C2H2	PHD	http://plntfdb.bio.uni-potsdam.de/v3.0/fam_mem.php?family_id=C2H2
Ghir_A02G004900	mTERF	mTERF	-	http://plntfdb.bio.uni-potsdam.de/v3.0/fam_mem.php?family_id=mTERF
Ghir_A11G002280	bHLH	HLH	-	http://plntfdb.bio.uni-potsdam.de/v3.0/fam_mem.php?family_id=bHLH
Ghir_A07G021450	AP2-EREBP	AP2	-	http://plntfdb.bio.uni-potsdam.de/v3.0/fam_mem.php?family_id=AP2-EREBP
Ghir_D13G006480	MYB	Myb_DNA-binding	ARID,Response_reg,SNF2_N	http://plntfdb.bio.uni-potsdam.de/v3.0/fam_mem.php?family_id=MYB
Ghir_A03G017120	VOZ	VOZ	-	http://plntfdb.bio.uni-potsdam.de/v3.0/fam_mem.php?family_id=VOZ
Ghir_D12G022080	bHLH	HLH	-	http://plntfdb.bio.uni-potsdam.de/v3.0/fam_mem.php?family_id=bHLH
Ghir_D08G020010	bHLH	HLH	-	http://plntfdb.bio.uni-potsdam.de/v3.0/fam_mem.php?family_id=bHLH
Ghir_A06G008800	Trihelix	trihelix	-	http://plntfdb.bio.uni-potsdam.de/v3.0/fam_mem.php?family_id=Trihelix
Ghir_D07G014210	WRKY	WRKY	-	http://plntfdb.bio.uni-potsdam.de/v3.0/fam_mem.php?family_id=WRKY
Ghir_D07G016740.3	bHLH	HLH	-	http://plntfdb.bio.uni-potsdam.de/v3.0/fam_mem.php?family_id=bHLH
Ghir_A13G002710	C3H	zf-CCCH	PHD,SNF2_N,zf-C2H2	http://plntfdb.bio.uni-potsdam.de/v3.0/fam_mem.php?family_id=C3H
Ghir_A13G016550	HSF	HSF_DNA-bind	-	http://plntfdb.bio.uni-potsdam.de/v3.0/fam_mem.php?family_id=HSF
Ghir_D10G016420	AP2-EREBP	AP2	-	http://plntfdb.bio.uni-potsdam.de/v3.0/fam_mem.php?family_id=AP2-EREBP
Ghir_A01G011450	MYB	Myb_DNA-binding	ARID,Response_reg,SNF2_N	http://plntfdb.bio.uni-potsdam.de/v3.0/fam_mem.php?family_id=MYB
Ghir_A01G000830	NAC	NAM	-	http://plntfdb.bio.uni-potsdam.de/v3.0/fam_mem.php?family_id=NAC
BGI_novel_G006046	NAC	NAM	-	http://plntfdb.bio.uni-potsdam.de/v3.0/fam_mem.php?family_id=NAC
Ghir_A06G005310	PLATZ	PLATZ	-	http://plntfdb.bio.uni-potsdam.de/v3.0/fam_mem.php?family_id=PLATZ
Ghir_A02G003970	AP2-EREBP	AP2	-	http://plntfdb.bio.uni-potsdam.de/v3.0/fam_mem.php?family_id=AP2-EREBP
BGI_novel_G004233	MADS	SRF-TF	-	http://plntfdb.bio.uni-potsdam.de/v3.0/fam_mem.php?family_id=MADS
Ghir_A09G009380	FAR1	FAR1	-	http://plntfdb.bio.uni-potsdam.de/v3.0/fam_mem.php?family_id=FAR1
Ghir_A13G005000	MADS	SRF-TF	-	http://plntfdb.bio.uni-potsdam.de/v3.0/fam_mem.php?family_id=MADS
Ghir_D07G009700	C2C2-CO-like	CCT,zf-B_box	GATA,PLATZ	http://plntfdb.bio.uni-potsdam.de/v3.0/fam_mem.php?family_id=C2C2-CO-like
Ghir_A05G004690	C3H	zf-CCCH	PHD,SNF2_N,zf-C2H2	http://plntfdb.bio.uni-potsdam.de/v3.0/fam_mem.php?family_id=C3H
Ghir_A12G022100	bHLH	HLH	-	http://plntfdb.bio.uni-potsdam.de/v3.0/fam_mem.php?family_id=bHLH
Ghir_D07G019320	MYB	Myb_DNA-binding	ARID,Response_reg,SNF2_N	http://plntfdb.bio.uni-potsdam.de/v3.0/fam_mem.php?family_id=MYB
Ghir_D11G035660	Trihelix	trihelix	-	http://plntfdb.bio.uni-potsdam.de/v3.0/fam_mem.php?family_id=Trihelix
Ghir_D05G021650	GRF	QLQ,WRC	-	http://plntfdb.bio.uni-potsdam.de/v3.0/fam_mem.php?family_id=GRF
Ghir_D02G014220.2	BBR/BPC	GAGA_bind	-	http://plntfdb.bio.uni-potsdam.de/v3.0/fam_mem.php?family_id=BBR/BPC
Ghir_A08G013320	LOB	DUF260	-	http://plntfdb.bio.uni-potsdam.de/v3.0/fam_mem.php?family_id=LOB
Ghir_D07G006050	TAZ	zf-TAZ	PHD	http://plntfdb.bio.uni-potsdam.de/v3.0/fam_mem.php?family_id=TAZ
Ghir_A02G010170.2	NAC	NAM	-	http://plntfdb.bio.uni-potsdam.de/v3.0/fam_mem.php?family_id=NAC
Ghir_A08G023860	AP2-EREBP	AP2	-	http://plntfdb.bio.uni-potsdam.de/v3.0/fam_mem.php?family_id=AP2-EREBP
Ghir_A04G009000	MYB	Myb_DNA-binding	ARID,Response_reg,SNF2_N	http://plntfdb.bio.uni-potsdam.de/v3.0/fam_mem.php?family_id=MYB
Ghir_A12G009660	MADS	SRF-TF	-	http://plntfdb.bio.uni-potsdam.de/v3.0/fam_mem.php?family_id=MADS
Ghir_A11G005580	MADS	SRF-TF	-	http://plntfdb.bio.uni-potsdam.de/v3.0/fam_mem.php?family_id=MADS
Ghir_A13G022030.1	bHLH	HLH	-	http://plntfdb.bio.uni-potsdam.de/v3.0/fam_mem.php?family_id=bHLH
Ghir_D03G011730	MYB	Myb_DNA-binding	ARID,Response_reg,SNF2_N	http://plntfdb.bio.uni-potsdam.de/v3.0/fam_mem.php?family_id=MYB
Ghir_A12G011300	MYB	Myb_DNA-binding	ARID,Response_reg,SNF2_N	http://plntfdb.bio.uni-potsdam.de/v3.0/fam_mem.php?family_id=MYB
BGI_novel_G001415	MADS	SRF-TF	-	http://plntfdb.bio.uni-potsdam.de/v3.0/fam_mem.php?family_id=MADS
Ghir_D06G015400	WRKY	WRKY	-	http://plntfdb.bio.uni-potsdam.de/v3.0/fam_mem.php?family_id=WRKY
Ghir_D01G021800	Trihelix	trihelix	-	http://plntfdb.bio.uni-potsdam.de/v3.0/fam_mem.php?family_id=Trihelix
Ghir_D10G008140	AP2-EREBP	AP2	-	http://plntfdb.bio.uni-potsdam.de/v3.0/fam_mem.php?family_id=AP2-EREBP
Ghir_D09G014440	GRF	QLQ,WRC	-	http://plntfdb.bio.uni-potsdam.de/v3.0/fam_mem.php?family_id=GRF
Ghir_A02G003980	AP2-EREBP	AP2	-	http://plntfdb.bio.uni-potsdam.de/v3.0/fam_mem.php?family_id=AP2-EREBP
Ghir_D02G023130	SRS	DUF702	-	http://plntfdb.bio.uni-potsdam.de/v3.0/fam_mem.php?family_id=SRS
Ghir_D12G008300	MADS	SRF-TF	-	http://plntfdb.bio.uni-potsdam.de/v3.0/fam_mem.php?family_id=MADS
Ghir_A05G017200.1	MYB	Myb_DNA-binding	ARID,Response_reg,SNF2_N	http://plntfdb.bio.uni-potsdam.de/v3.0/fam_mem.php?family_id=MYB
Ghir_D05G009570	C2C2-Dof	zf-Dof	-	http://plntfdb.bio.uni-potsdam.de/v3.0/fam_mem.php?family_id=C2C2-Dof
Ghir_A07G008130	C3H	zf-CCCH	PHD,SNF2_N,zf-C2H2	http://plntfdb.bio.uni-potsdam.de/v3.0/fam_mem.php?family_id=C3H
Ghir_D05G016870	ABI3VP1	B3	AP2,Auxin_resp	http://plntfdb.bio.uni-potsdam.de/v3.0/fam_mem.php?family_id=ABI3VP1
Ghir_A08G016190.2	bZIP	bZIP_1,bZIP_2,bZIP_Maf	HLH	http://plntfdb.bio.uni-potsdam.de/v3.0/fam_mem.php?family_id=bZIP
Ghir_D11G003170	HSF	HSF_DNA-bind	-	http://plntfdb.bio.uni-potsdam.de/v3.0/fam_mem.php?family_id=HSF
Ghir_A08G012990	MYB	Myb_DNA-binding	ARID,Response_reg,SNF2_N	http://plntfdb.bio.uni-potsdam.de/v3.0/fam_mem.php?family_id=MYB
Ghir_A05G014030	MYB	Myb_DNA-binding	ARID,Response_reg,SNF2_N	http://plntfdb.bio.uni-potsdam.de/v3.0/fam_mem.php?family_id=MYB
Ghir_A02G011310	WRKY	WRKY	-	http://plntfdb.bio.uni-potsdam.de/v3.0/fam_mem.php?family_id=WRKY
Ghir_A06G017060	bHLH	HLH	-	http://plntfdb.bio.uni-potsdam.de/v3.0/fam_mem.php?family_id=bHLH
Ghir_D05G030340.1	MYB	Myb_DNA-binding	ARID,Response_reg,SNF2_N	http://plntfdb.bio.uni-potsdam.de/v3.0/fam_mem.php?family_id=MYB
Ghir_D05G007140.1	bHLH	HLH	-	http://plntfdb.bio.uni-potsdam.de/v3.0/fam_mem.php?family_id=bHLH
Ghir_D12G023650	GRF	QLQ,WRC	-	http://plntfdb.bio.uni-potsdam.de/v3.0/fam_mem.php?family_id=GRF
Ghir_D01G011570	ABI3VP1	B3	AP2,Auxin_resp	http://plntfdb.bio.uni-potsdam.de/v3.0/fam_mem.php?family_id=ABI3VP1
Ghir_A07G009930	bHLH	HLH	-	http://plntfdb.bio.uni-potsdam.de/v3.0/fam_mem.php?family_id=bHLH
Ghir_D07G015910.1	C2C2-YABBY	YABBY	-	http://plntfdb.bio.uni-potsdam.de/v3.0/fam_mem.php?family_id=C2C2-YABBY
Ghir_D08G007010	HSF	HSF_DNA-bind	-	http://plntfdb.bio.uni-potsdam.de/v3.0/fam_mem.php?family_id=HSF
Ghir_D09G017490	C2C2-Dof	zf-Dof	-	http://plntfdb.bio.uni-potsdam.de/v3.0/fam_mem.php?family_id=C2C2-Dof
Ghir_D02G008460	AP2-EREBP	AP2	-	http://plntfdb.bio.uni-potsdam.de/v3.0/fam_mem.php?family_id=AP2-EREBP
Ghir_D06G002470	MYB	Myb_DNA-binding	ARID,Response_reg,SNF2_N	http://plntfdb.bio.uni-potsdam.de/v3.0/fam_mem.php?family_id=MYB
Ghir_D02G001310	GRAS	GRAS	-	http://plntfdb.bio.uni-potsdam.de/v3.0/fam_mem.php?family_id=GRAS
Ghir_A07G022830	AP2-EREBP	AP2	-	http://plntfdb.bio.uni-potsdam.de/v3.0/fam_mem.php?family_id=AP2-EREBP
Ghir_A08G007970	C2H2	zf-C2H2	PHD	http://plntfdb.bio.uni-potsdam.de/v3.0/fam_mem.php?family_id=C2H2
Ghir_D09G005160	LOB	DUF260	-	http://plntfdb.bio.uni-potsdam.de/v3.0/fam_mem.php?family_id=LOB
Ghir_D08G004050	MYB	Myb_DNA-binding	ARID,Response_reg,SNF2_N	http://plntfdb.bio.uni-potsdam.de/v3.0/fam_mem.php?family_id=MYB
Ghir_D03G009330	NAC	NAM	-	http://plntfdb.bio.uni-potsdam.de/v3.0/fam_mem.php?family_id=NAC
Ghir_A07G015640.1	C2C2-YABBY	YABBY	-	http://plntfdb.bio.uni-potsdam.de/v3.0/fam_mem.php?family_id=C2C2-YABBY
Ghir_A12G018090.2	NAC	NAM	-	http://plntfdb.bio.uni-potsdam.de/v3.0/fam_mem.php?family_id=NAC
Ghir_A07G001710	ARF	Auxin_resp	-	http://plntfdb.bio.uni-potsdam.de/v3.0/fam_mem.php?family_id=ARF
Ghir_D05G000820	MYB	Myb_DNA-binding	ARID,Response_reg,SNF2_N	http://plntfdb.bio.uni-potsdam.de/v3.0/fam_mem.php?family_id=MYB
Ghir_A09G004190	MYB	Myb_DNA-binding	ARID,Response_reg,SNF2_N	http://plntfdb.bio.uni-potsdam.de/v3.0/fam_mem.php?family_id=MYB
Ghir_D04G011320	AP2-EREBP	AP2	-	http://plntfdb.bio.uni-potsdam.de/v3.0/fam_mem.php?family_id=AP2-EREBP
Ghir_A03G022610	NAC	NAM	-	http://plntfdb.bio.uni-potsdam.de/v3.0/fam_mem.php?family_id=NAC
Ghir_A11G000170	C2H2	zf-C2H2	PHD	http://plntfdb.bio.uni-potsdam.de/v3.0/fam_mem.php?family_id=C2H2
Ghir_A10G004060.3	TCP	TCP	-	http://plntfdb.bio.uni-potsdam.de/v3.0/fam_mem.php?family_id=TCP
Ghir_A05G003120	bHLH	HLH	-	http://plntfdb.bio.uni-potsdam.de/v3.0/fam_mem.php?family_id=bHLH
Ghir_A08G026670	C2H2	zf-C2H2	PHD	http://plntfdb.bio.uni-potsdam.de/v3.0/fam_mem.php?family_id=C2H2
Ghir_D10G002810	C2C2-Dof	zf-Dof	-	http://plntfdb.bio.uni-potsdam.de/v3.0/fam_mem.php?family_id=C2C2-Dof
Ghir_D09G016240	C2H2	zf-C2H2	PHD	http://plntfdb.bio.uni-potsdam.de/v3.0/fam_mem.php?family_id=C2H2
Ghir_A12G019920	C3H	zf-CCCH	PHD,SNF2_N,zf-C2H2	http://plntfdb.bio.uni-potsdam.de/v3.0/fam_mem.php?family_id=C3H
Ghir_D03G014650.1	FAR1	FAR1	-	http://plntfdb.bio.uni-potsdam.de/v3.0/fam_mem.php?family_id=FAR1
Ghir_D11G002790	AP2-EREBP	AP2	-	http://plntfdb.bio.uni-potsdam.de/v3.0/fam_mem.php?family_id=AP2-EREBP
Ghir_D03G006950.1	CPP	TCR	-	http://plntfdb.bio.uni-potsdam.de/v3.0/fam_mem.php?family_id=CPP
Ghir_D11G008970	MADS	SRF-TF	-	http://plntfdb.bio.uni-potsdam.de/v3.0/fam_mem.php?family_id=MADS
Ghir_D05G017730	HB	Homeobox,KNOX1,KNOX2	-	http://plntfdb.bio.uni-potsdam.de/v3.0/fam_mem.php?family_id=HB
Ghir_A06G017510	Alfin-like	Alfin-like	DDT,Homeobox,JmjC,JmjN	http://plntfdb.bio.uni-potsdam.de/v3.0/fam_mem.php?family_id=Alfin-like
Ghir_A12G025150.1	C2C2-Dof	zf-Dof	-	http://plntfdb.bio.uni-potsdam.de/v3.0/fam_mem.php?family_id=C2C2-Dof
Ghir_D05G012940	Trihelix	trihelix	-	http://plntfdb.bio.uni-potsdam.de/v3.0/fam_mem.php?family_id=Trihelix
Ghir_A12G000050.1	MADS	SRF-TF	-	http://plntfdb.bio.uni-potsdam.de/v3.0/fam_mem.php?family_id=MADS
Ghir_D05G024840	AP2-EREBP	AP2	-	http://plntfdb.bio.uni-potsdam.de/v3.0/fam_mem.php?family_id=AP2-EREBP
Ghir_D03G008560	WRKY	WRKY	-	http://plntfdb.bio.uni-potsdam.de/v3.0/fam_mem.php?family_id=WRKY
Ghir_D08G018980	MYB	Myb_DNA-binding	ARID,Response_reg,SNF2_N	http://plntfdb.bio.uni-potsdam.de/v3.0/fam_mem.php?family_id=MYB
Ghir_D05G014340	AP2-EREBP	AP2	-	http://plntfdb.bio.uni-potsdam.de/v3.0/fam_mem.php?family_id=AP2-EREBP
Ghir_A11G005420	LOB	DUF260	-	http://plntfdb.bio.uni-potsdam.de/v3.0/fam_mem.php?family_id=LOB
Ghir_D02G017450	bHLH	HLH	-	http://plntfdb.bio.uni-potsdam.de/v3.0/fam_mem.php?family_id=bHLH
Ghir_A04G002850	NAC	NAM	-	http://plntfdb.bio.uni-potsdam.de/v3.0/fam_mem.php?family_id=NAC
Ghir_A11G022370	bHLH	HLH	-	http://plntfdb.bio.uni-potsdam.de/v3.0/fam_mem.php?family_id=bHLH
Ghir_D01G002620	mTERF	mTERF	-	http://plntfdb.bio.uni-potsdam.de/v3.0/fam_mem.php?family_id=mTERF
Ghir_A11G003940	C2C2-Dof	zf-Dof	-	http://plntfdb.bio.uni-potsdam.de/v3.0/fam_mem.php?family_id=C2C2-Dof
Ghir_A06G004450	GRAS	GRAS	-	http://plntfdb.bio.uni-potsdam.de/v3.0/fam_mem.php?family_id=GRAS
Ghir_A11G035630.1	AP2-EREBP	AP2	-	http://plntfdb.bio.uni-potsdam.de/v3.0/fam_mem.php?family_id=AP2-EREBP
Ghir_A01G016880	WRKY	WRKY	-	http://plntfdb.bio.uni-potsdam.de/v3.0/fam_mem.php?family_id=WRKY
Ghir_D09G014530.1	HSF	HSF_DNA-bind	-	http://plntfdb.bio.uni-potsdam.de/v3.0/fam_mem.php?family_id=HSF
Ghir_A13G009620	bHLH	HLH	-	http://plntfdb.bio.uni-potsdam.de/v3.0/fam_mem.php?family_id=bHLH
Ghir_A12G023660	GRF	QLQ,WRC	-	http://plntfdb.bio.uni-potsdam.de/v3.0/fam_mem.php?family_id=GRF
Ghir_D05G008900	bHLH	HLH	-	http://plntfdb.bio.uni-potsdam.de/v3.0/fam_mem.php?family_id=bHLH
Ghir_A08G026570	C2C2-CO-like	CCT,zf-B_box	GATA,PLATZ	http://plntfdb.bio.uni-potsdam.de/v3.0/fam_mem.php?family_id=C2C2-CO-like
Ghir_A05G010260.2	AP2-EREBP	AP2	-	http://plntfdb.bio.uni-potsdam.de/v3.0/fam_mem.php?family_id=AP2-EREBP
Ghir_A04G002690.2	ULT	ULT	-	http://plntfdb.bio.uni-potsdam.de/v3.0/fam_mem.php?family_id=ULT
Ghir_D11G022010	bHLH	HLH	-	http://plntfdb.bio.uni-potsdam.de/v3.0/fam_mem.php?family_id=bHLH
Ghir_D06G017960	C3H	zf-CCCH	PHD,SNF2_N,zf-C2H2	http://plntfdb.bio.uni-potsdam.de/v3.0/fam_mem.php?family_id=C3H
Ghir_A08G024310	NAC	NAM	-	http://plntfdb.bio.uni-potsdam.de/v3.0/fam_mem.php?family_id=NAC
Ghir_A12G016120	SBP	SBP	-	http://plntfdb.bio.uni-potsdam.de/v3.0/fam_mem.php?family_id=SBP
Ghir_A11G020550	bHLH	HLH	-	http://plntfdb.bio.uni-potsdam.de/v3.0/fam_mem.php?family_id=bHLH
Ghir_D01G018910	MADS	SRF-TF	-	http://plntfdb.bio.uni-potsdam.de/v3.0/fam_mem.php?family_id=MADS
Ghir_D03G001110	C3H	zf-CCCH	PHD,SNF2_N,zf-C2H2	http://plntfdb.bio.uni-potsdam.de/v3.0/fam_mem.php?family_id=C3H
Ghir_D08G015540	AP2-EREBP	AP2	-	http://plntfdb.bio.uni-potsdam.de/v3.0/fam_mem.php?family_id=AP2-EREBP
Ghir_A12G022770	AP2-EREBP	AP2	-	http://plntfdb.bio.uni-potsdam.de/v3.0/fam_mem.php?family_id=AP2-EREBP
Ghir_A03G023830	LOB	DUF260	-	http://plntfdb.bio.uni-potsdam.de/v3.0/fam_mem.php?family_id=LOB
BGI_novel_G002606	GRAS	GRAS	-	http://plntfdb.bio.uni-potsdam.de/v3.0/fam_mem.php?family_id=GRAS
Ghir_A05G042100.1	ARF	Auxin_resp	-	http://plntfdb.bio.uni-potsdam.de/v3.0/fam_mem.php?family_id=ARF
Ghir_D11G019470	MYB	Myb_DNA-binding	ARID,Response_reg,SNF2_N	http://plntfdb.bio.uni-potsdam.de/v3.0/fam_mem.php?family_id=MYB
Ghir_A12G019550.2	WRKY	WRKY	-	http://plntfdb.bio.uni-potsdam.de/v3.0/fam_mem.php?family_id=WRKY
Ghir_A02G011570	C2H2	zf-C2H2	PHD	http://plntfdb.bio.uni-potsdam.de/v3.0/fam_mem.php?family_id=C2H2
Ghir_D04G014480	GRAS	GRAS	-	http://plntfdb.bio.uni-potsdam.de/v3.0/fam_mem.php?family_id=GRAS
Ghir_A02G009380	FAR1	FAR1	-	http://plntfdb.bio.uni-potsdam.de/v3.0/fam_mem.php?family_id=FAR1
Ghir_D02G001290.1	GRAS	GRAS	-	http://plntfdb.bio.uni-potsdam.de/v3.0/fam_mem.php?family_id=GRAS
Ghir_D06G003020	C2C2-GATA	GATA	-	http://plntfdb.bio.uni-potsdam.de/v3.0/fam_mem.php?family_id=C2C2-GATA
Ghir_A09G007960	HSF	HSF_DNA-bind	-	http://plntfdb.bio.uni-potsdam.de/v3.0/fam_mem.php?family_id=HSF
Ghir_D08G016360	Trihelix	trihelix	-	http://plntfdb.bio.uni-potsdam.de/v3.0/fam_mem.php?family_id=Trihelix
Ghir_D05G039640	AP2-EREBP	AP2	-	http://plntfdb.bio.uni-potsdam.de/v3.0/fam_mem.php?family_id=AP2-EREBP
Ghir_D09G012670	C2H2	zf-C2H2	PHD	http://plntfdb.bio.uni-potsdam.de/v3.0/fam_mem.php?family_id=C2H2
Ghir_D10G001110.1	MYB	Myb_DNA-binding	ARID,Response_reg,SNF2_N	http://plntfdb.bio.uni-potsdam.de/v3.0/fam_mem.php?family_id=MYB
Ghir_D02G008010	MYB	Myb_DNA-binding	ARID,Response_reg,SNF2_N	http://plntfdb.bio.uni-potsdam.de/v3.0/fam_mem.php?family_id=MYB
Ghir_D12G024800	WRKY	WRKY	-	http://plntfdb.bio.uni-potsdam.de/v3.0/fam_mem.php?family_id=WRKY
Ghir_D09G010970	ARF	Auxin_resp	-	http://plntfdb.bio.uni-potsdam.de/v3.0/fam_mem.php?family_id=ARF
Ghir_D11G019470.1	MYB	Myb_DNA-binding	ARID,Response_reg,SNF2_N	http://plntfdb.bio.uni-potsdam.de/v3.0/fam_mem.php?family_id=MYB
Ghir_D05G006940	C2C2-GATA	GATA	-	http://plntfdb.bio.uni-potsdam.de/v3.0/fam_mem.php?family_id=C2C2-GATA
Ghir_A05G019160	ARF	Auxin_resp	-	http://plntfdb.bio.uni-potsdam.de/v3.0/fam_mem.php?family_id=ARF
Ghir_A10G017050	AP2-EREBP	AP2	-	http://plntfdb.bio.uni-potsdam.de/v3.0/fam_mem.php?family_id=AP2-EREBP
Ghir_A05G021670	BSD	BSD	-	http://plntfdb.bio.uni-potsdam.de/v3.0/fam_mem.php?family_id=BSD
Ghir_D07G012510	LOB	DUF260	-	http://plntfdb.bio.uni-potsdam.de/v3.0/fam_mem.php?family_id=LOB
Ghir_D05G020910	NAC	NAM	-	http://plntfdb.bio.uni-potsdam.de/v3.0/fam_mem.php?family_id=NAC
Ghir_A06G019360	bZIP	bZIP_1,bZIP_2,bZIP_Maf	HLH	http://plntfdb.bio.uni-potsdam.de/v3.0/fam_mem.php?family_id=bZIP
Ghir_A02G011000	AP2-EREBP	AP2	-	http://plntfdb.bio.uni-potsdam.de/v3.0/fam_mem.php?family_id=AP2-EREBP
Ghir_A12G018010	G2-like	G2-like	Response_reg	http://plntfdb.bio.uni-potsdam.de/v3.0/fam_mem.php?family_id=G2-like
Ghir_D09G020260	bHLH	HLH	-	http://plntfdb.bio.uni-potsdam.de/v3.0/fam_mem.php?family_id=bHLH
Ghir_D02G005990	WRKY	WRKY	-	http://plntfdb.bio.uni-potsdam.de/v3.0/fam_mem.php?family_id=WRKY
Ghir_D06G012510	MADS	SRF-TF	-	http://plntfdb.bio.uni-potsdam.de/v3.0/fam_mem.php?family_id=MADS
Ghir_D10G021520.1	AP2-EREBP	AP2	-	http://plntfdb.bio.uni-potsdam.de/v3.0/fam_mem.php?family_id=AP2-EREBP
Ghir_A08G013670	MADS	SRF-TF	-	http://plntfdb.bio.uni-potsdam.de/v3.0/fam_mem.php?family_id=MADS
Ghir_D08G014930	MYB	Myb_DNA-binding	ARID,Response_reg,SNF2_N	http://plntfdb.bio.uni-potsdam.de/v3.0/fam_mem.php?family_id=MYB
Ghir_A12G026750	WRKY	WRKY	-	http://plntfdb.bio.uni-potsdam.de/v3.0/fam_mem.php?family_id=WRKY
Ghir_A09G000800.3	ARF	Auxin_resp	-	http://plntfdb.bio.uni-potsdam.de/v3.0/fam_mem.php?family_id=ARF
Ghir_A05G013520	AP2-EREBP	AP2	-	http://plntfdb.bio.uni-potsdam.de/v3.0/fam_mem.php?family_id=AP2-EREBP
Ghir_D03G017630	GRAS	GRAS	-	http://plntfdb.bio.uni-potsdam.de/v3.0/fam_mem.php?family_id=GRAS
Ghir_A12G025540	ABI3VP1	B3	AP2,Auxin_resp	http://plntfdb.bio.uni-potsdam.de/v3.0/fam_mem.php?family_id=ABI3VP1
Ghir_A06G011660.2	Alfin-like	Alfin-like	DDT,Homeobox,JmjC,JmjN	http://plntfdb.bio.uni-potsdam.de/v3.0/fam_mem.php?family_id=Alfin-like
Ghir_D07G018030	SAP	STER_AP	-	http://plntfdb.bio.uni-potsdam.de/v3.0/fam_mem.php?family_id=SAP
Ghir_A04G010400	WRKY	WRKY	-	http://plntfdb.bio.uni-potsdam.de/v3.0/fam_mem.php?family_id=WRKY
Ghir_A09G016450	MYB	Myb_DNA-binding	ARID,Response_reg,SNF2_N	http://plntfdb.bio.uni-potsdam.de/v3.0/fam_mem.php?family_id=MYB
Ghir_D07G014410	ABI3VP1	B3	AP2,Auxin_resp	http://plntfdb.bio.uni-potsdam.de/v3.0/fam_mem.php?family_id=ABI3VP1
Ghir_D10G016400	bHLH	HLH	-	http://plntfdb.bio.uni-potsdam.de/v3.0/fam_mem.php?family_id=bHLH
Ghir_D07G003690	WRKY	WRKY	-	http://plntfdb.bio.uni-potsdam.de/v3.0/fam_mem.php?family_id=WRKY
Ghir_A07G010730	GRAS	GRAS	-	http://plntfdb.bio.uni-potsdam.de/v3.0/fam_mem.php?family_id=GRAS
Ghir_D02G007270	C2C2-Dof	zf-Dof	-	http://plntfdb.bio.uni-potsdam.de/v3.0/fam_mem.php?family_id=C2C2-Dof
Ghir_A04G016400.1	Sigma70-like	Sigma70_r2,Sigma70_r3,Sigma70_r4	-	http://plntfdb.bio.uni-potsdam.de/v3.0/fam_mem.php?family_id=Sigma70-like
Ghir_D10G018030	C3H	zf-CCCH	PHD,SNF2_N,zf-C2H2	http://plntfdb.bio.uni-potsdam.de/v3.0/fam_mem.php?family_id=C3H
Ghir_A12G022760	AP2-EREBP	AP2	-	http://plntfdb.bio.uni-potsdam.de/v3.0/fam_mem.php?family_id=AP2-EREBP
Ghir_A12G027140	MYB	Myb_DNA-binding	ARID,Response_reg,SNF2_N	http://plntfdb.bio.uni-potsdam.de/v3.0/fam_mem.php?family_id=MYB
Ghir_D12G019790	bZIP	bZIP_1,bZIP_2,bZIP_Maf	HLH	http://plntfdb.bio.uni-potsdam.de/v3.0/fam_mem.php?family_id=bZIP
Ghir_A10G020930.1	C2C2-GATA	GATA	-	http://plntfdb.bio.uni-potsdam.de/v3.0/fam_mem.php?family_id=C2C2-GATA
Ghir_A02G018500	MADS	SRF-TF	-	http://plntfdb.bio.uni-potsdam.de/v3.0/fam_mem.php?family_id=MADS
Ghir_D13G017240.1	HSF	HSF_DNA-bind	-	http://plntfdb.bio.uni-potsdam.de/v3.0/fam_mem.php?family_id=HSF
Ghir_D10G022730	C2C2-GATA	GATA	-	http://plntfdb.bio.uni-potsdam.de/v3.0/fam_mem.php?family_id=C2C2-GATA
Ghir_D13G025100	ARF	Auxin_resp	-	http://plntfdb.bio.uni-potsdam.de/v3.0/fam_mem.php?family_id=ARF
Ghir_A05G042010.1	C3H	zf-CCCH	PHD,SNF2_N,zf-C2H2	http://plntfdb.bio.uni-potsdam.de/v3.0/fam_mem.php?family_id=C3H
Ghir_D05G016180	NAC	NAM	-	http://plntfdb.bio.uni-potsdam.de/v3.0/fam_mem.php?family_id=NAC
Ghir_D12G024530	WRKY	WRKY	-	http://plntfdb.bio.uni-potsdam.de/v3.0/fam_mem.php?family_id=WRKY
Ghir_D11G023420	MADS	SRF-TF	-	http://plntfdb.bio.uni-potsdam.de/v3.0/fam_mem.php?family_id=MADS
Ghir_A02G008410.1	Tify	tify	GATA	http://plntfdb.bio.uni-potsdam.de/v3.0/fam_mem.php?family_id=Tify
Ghir_A07G015640	C2C2-YABBY	YABBY	-	http://plntfdb.bio.uni-potsdam.de/v3.0/fam_mem.php?family_id=C2C2-YABBY
Ghir_A13G002520	HSF	HSF_DNA-bind	-	http://plntfdb.bio.uni-potsdam.de/v3.0/fam_mem.php?family_id=HSF
Ghir_D05G028080	GRAS	GRAS	-	http://plntfdb.bio.uni-potsdam.de/v3.0/fam_mem.php?family_id=GRAS
Ghir_D11G034590	MADS	SRF-TF	-	http://plntfdb.bio.uni-potsdam.de/v3.0/fam_mem.php?family_id=MADS
Ghir_D09G011100.1	MYB	Myb_DNA-binding	ARID,Response_reg,SNF2_N	http://plntfdb.bio.uni-potsdam.de/v3.0/fam_mem.php?family_id=MYB
Ghir_A05G031920.1	Tify	tify	GATA	http://plntfdb.bio.uni-potsdam.de/v3.0/fam_mem.php?family_id=Tify
Ghir_D08G004530	PLATZ	PLATZ	-	http://plntfdb.bio.uni-potsdam.de/v3.0/fam_mem.php?family_id=PLATZ
Ghir_D01G010890	FHA	FHA	-	http://plntfdb.bio.uni-potsdam.de/v3.0/fam_mem.php?family_id=FHA
Ghir_D11G009920	WRKY	WRKY	-	http://plntfdb.bio.uni-potsdam.de/v3.0/fam_mem.php?family_id=WRKY
Ghir_D01G008140	GRAS	GRAS	-	http://plntfdb.bio.uni-potsdam.de/v3.0/fam_mem.php?family_id=GRAS
Ghir_A08G001270	C2C2-Dof	zf-Dof	-	http://plntfdb.bio.uni-potsdam.de/v3.0/fam_mem.php?family_id=C2C2-Dof
Ghir_A08G014830	WRKY	WRKY	-	http://plntfdb.bio.uni-potsdam.de/v3.0/fam_mem.php?family_id=WRKY
Ghir_D03G016710	HSF	HSF_DNA-bind	-	http://plntfdb.bio.uni-potsdam.de/v3.0/fam_mem.php?family_id=HSF
Ghir_D08G018750	WRKY	WRKY	-	http://plntfdb.bio.uni-potsdam.de/v3.0/fam_mem.php?family_id=WRKY
Ghir_A01G020560	MYB	Myb_DNA-binding	ARID,Response_reg,SNF2_N	http://plntfdb.bio.uni-potsdam.de/v3.0/fam_mem.php?family_id=MYB
Ghir_D09G003180	NAC	NAM	-	http://plntfdb.bio.uni-potsdam.de/v3.0/fam_mem.php?family_id=NAC
Ghir_A11G012620	ARF	Auxin_resp	-	http://plntfdb.bio.uni-potsdam.de/v3.0/fam_mem.php?family_id=ARF
Ghir_A11G024470	C3H	zf-CCCH	PHD,SNF2_N,zf-C2H2	http://plntfdb.bio.uni-potsdam.de/v3.0/fam_mem.php?family_id=C3H
Ghir_D13G009980	BBR/BPC	GAGA_bind	-	http://plntfdb.bio.uni-potsdam.de/v3.0/fam_mem.php?family_id=BBR/BPC
Ghir_D10G012240	ABI3VP1	B3	AP2,Auxin_resp	http://plntfdb.bio.uni-potsdam.de/v3.0/fam_mem.php?family_id=ABI3VP1
Ghir_A02G008600	GRF	QLQ,WRC	-	http://plntfdb.bio.uni-potsdam.de/v3.0/fam_mem.php?family_id=GRF
Ghir_A08G017440	AP2-EREBP	AP2	-	http://plntfdb.bio.uni-potsdam.de/v3.0/fam_mem.php?family_id=AP2-EREBP
Ghir_A02G008540	HB	Homeobox,KNOX1,KNOX2	-	http://plntfdb.bio.uni-potsdam.de/v3.0/fam_mem.php?family_id=HB
Ghir_A08G020810.4	C2C2-GATA	GATA	-	http://plntfdb.bio.uni-potsdam.de/v3.0/fam_mem.php?family_id=C2C2-GATA
Ghir_D02G022230	ABI3VP1	B3	AP2,Auxin_resp	http://plntfdb.bio.uni-potsdam.de/v3.0/fam_mem.php?family_id=ABI3VP1
Ghir_D13G023520	C2H2	zf-C2H2	PHD	http://plntfdb.bio.uni-potsdam.de/v3.0/fam_mem.php?family_id=C2H2
Ghir_A07G006010	C3H	zf-CCCH	PHD,SNF2_N,zf-C2H2	http://plntfdb.bio.uni-potsdam.de/v3.0/fam_mem.php?family_id=C3H
Ghir_D05G008230	NAC	NAM	-	http://plntfdb.bio.uni-potsdam.de/v3.0/fam_mem.php?family_id=NAC
Ghir_A05G030920	C2C2-Dof	zf-Dof	-	http://plntfdb.bio.uni-potsdam.de/v3.0/fam_mem.php?family_id=C2C2-Dof
Ghir_A10G017470	CAMTA	CG-1,IQ	-	http://plntfdb.bio.uni-potsdam.de/v3.0/fam_mem.php?family_id=CAMTA
Ghir_A07G014790	AP2-EREBP	AP2	-	http://plntfdb.bio.uni-potsdam.de/v3.0/fam_mem.php?family_id=AP2-EREBP
Ghir_A12G028120.1	Trihelix	trihelix	-	http://plntfdb.bio.uni-potsdam.de/v3.0/fam_mem.php?family_id=Trihelix
Ghir_D02G020920.1	MADS	SRF-TF	-	http://plntfdb.bio.uni-potsdam.de/v3.0/fam_mem.php?family_id=MADS
Ghir_D02G018320	AP2-EREBP	AP2	-	http://plntfdb.bio.uni-potsdam.de/v3.0/fam_mem.php?family_id=AP2-EREBP
Ghir_D12G028040	AP2-EREBP	AP2	-	http://plntfdb.bio.uni-potsdam.de/v3.0/fam_mem.php?family_id=AP2-EREBP
Ghir_A09G008130	NAC	NAM	-	http://plntfdb.bio.uni-potsdam.de/v3.0/fam_mem.php?family_id=NAC
Ghir_D13G003700	ABI3VP1	B3	AP2,Auxin_resp	http://plntfdb.bio.uni-potsdam.de/v3.0/fam_mem.php?family_id=ABI3VP1
Ghir_A03G020800	ABI3VP1	B3	AP2,Auxin_resp	http://plntfdb.bio.uni-potsdam.de/v3.0/fam_mem.php?family_id=ABI3VP1
Ghir_D10G017760	TUB	Tub	-	http://plntfdb.bio.uni-potsdam.de/v3.0/fam_mem.php?family_id=TUB
Ghir_A10G013990	FAR1	FAR1	-	http://plntfdb.bio.uni-potsdam.de/v3.0/fam_mem.php?family_id=FAR1
Ghir_A07G012360	C2C2-Dof	zf-Dof	-	http://plntfdb.bio.uni-potsdam.de/v3.0/fam_mem.php?family_id=C2C2-Dof
Ghir_A05G030580	bHLH	HLH	-	http://plntfdb.bio.uni-potsdam.de/v3.0/fam_mem.php?family_id=bHLH
Ghir_D01G000790	NAC	NAM	-	http://plntfdb.bio.uni-potsdam.de/v3.0/fam_mem.php?family_id=NAC
Ghir_A12G005860	C2C2-CO-like	CCT,zf-B_box	GATA,PLATZ	http://plntfdb.bio.uni-potsdam.de/v3.0/fam_mem.php?family_id=C2C2-CO-like
Ghir_D09G007780	HSF	HSF_DNA-bind	-	http://plntfdb.bio.uni-potsdam.de/v3.0/fam_mem.php?family_id=HSF
Ghir_A13G008990	C3H	zf-CCCH	PHD,SNF2_N,zf-C2H2	http://plntfdb.bio.uni-potsdam.de/v3.0/fam_mem.php?family_id=C3H
Ghir_A13G002240.1	MYB	Myb_DNA-binding	ARID,Response_reg,SNF2_N	http://plntfdb.bio.uni-potsdam.de/v3.0/fam_mem.php?family_id=MYB
Ghir_D01G001630	MYB	Myb_DNA-binding	ARID,Response_reg,SNF2_N	http://plntfdb.bio.uni-potsdam.de/v3.0/fam_mem.php?family_id=MYB
Ghir_A12G024170	Alfin-like	Alfin-like	DDT,Homeobox,JmjC,JmjN	http://plntfdb.bio.uni-potsdam.de/v3.0/fam_mem.php?family_id=Alfin-like
Ghir_A13G007180.1	PBF-2-like	Whirly	-	http://plntfdb.bio.uni-potsdam.de/v3.0/fam_mem.php?family_id=PBF-2-like
Ghir_D09G004350	AP2-EREBP	AP2	-	http://plntfdb.bio.uni-potsdam.de/v3.0/fam_mem.php?family_id=AP2-EREBP
Ghir_A01G017860	C2C2-CO-like	CCT,zf-B_box	GATA,PLATZ	http://plntfdb.bio.uni-potsdam.de/v3.0/fam_mem.php?family_id=C2C2-CO-like
Ghir_D13G017290	PLATZ	PLATZ	-	http://plntfdb.bio.uni-potsdam.de/v3.0/fam_mem.php?family_id=PLATZ
Ghir_A03G022260	MYB	Myb_DNA-binding	ARID,Response_reg,SNF2_N	http://plntfdb.bio.uni-potsdam.de/v3.0/fam_mem.php?family_id=MYB
Ghir_D11G003910	bHLH	HLH	-	http://plntfdb.bio.uni-potsdam.de/v3.0/fam_mem.php?family_id=bHLH
Ghir_A03G010710	C3H	zf-CCCH	PHD,SNF2_N,zf-C2H2	http://plntfdb.bio.uni-potsdam.de/v3.0/fam_mem.php?family_id=C3H
Ghir_A12G000820	C2C2-CO-like	CCT,zf-B_box	GATA,PLATZ	http://plntfdb.bio.uni-potsdam.de/v3.0/fam_mem.php?family_id=C2C2-CO-like
Ghir_D01G021990	C2H2	zf-C2H2	PHD	http://plntfdb.bio.uni-potsdam.de/v3.0/fam_mem.php?family_id=C2H2
Ghir_D01G001930	C3H	zf-CCCH	PHD,SNF2_N,zf-C2H2	http://plntfdb.bio.uni-potsdam.de/v3.0/fam_mem.php?family_id=C3H
Ghir_D10G022250	C2H2	zf-C2H2	PHD	http://plntfdb.bio.uni-potsdam.de/v3.0/fam_mem.php?family_id=C2H2
Ghir_A12G020850	C3H	zf-CCCH	PHD,SNF2_N,zf-C2H2	http://plntfdb.bio.uni-potsdam.de/v3.0/fam_mem.php?family_id=C3H
Ghir_A05G041220	Trihelix	trihelix	-	http://plntfdb.bio.uni-potsdam.de/v3.0/fam_mem.php?family_id=Trihelix
Ghir_D07G019980	FAR1	FAR1	-	http://plntfdb.bio.uni-potsdam.de/v3.0/fam_mem.php?family_id=FAR1
Ghir_D13G007560	bHLH	HLH	-	http://plntfdb.bio.uni-potsdam.de/v3.0/fam_mem.php?family_id=bHLH
Ghir_A05G008990	C3H	zf-CCCH	PHD,SNF2_N,zf-C2H2	http://plntfdb.bio.uni-potsdam.de/v3.0/fam_mem.php?family_id=C3H
Ghir_A12G016420	C2H2	zf-C2H2	PHD	http://plntfdb.bio.uni-potsdam.de/v3.0/fam_mem.php?family_id=C2H2
Ghir_A04G000280	MYB	Myb_DNA-binding	ARID,Response_reg,SNF2_N	http://plntfdb.bio.uni-potsdam.de/v3.0/fam_mem.php?family_id=MYB
Ghir_D05G019340	AP2-EREBP	AP2	-	http://plntfdb.bio.uni-potsdam.de/v3.0/fam_mem.php?family_id=AP2-EREBP
Ghir_A03G013150	C2H2	zf-C2H2	PHD	http://plntfdb.bio.uni-potsdam.de/v3.0/fam_mem.php?family_id=C2H2
Ghir_A03G008130	C2H2	zf-C2H2	PHD	http://plntfdb.bio.uni-potsdam.de/v3.0/fam_mem.php?family_id=C2H2
BGI_novel_G002522	HSF	HSF_DNA-bind	-	http://plntfdb.bio.uni-potsdam.de/v3.0/fam_mem.php?family_id=HSF
BGI_novel_G006900	C3H	zf-CCCH	PHD,SNF2_N,zf-C2H2	http://plntfdb.bio.uni-potsdam.de/v3.0/fam_mem.php?family_id=C3H
Ghir_A08G005430	C2C2-CO-like	CCT,zf-B_box	GATA,PLATZ	http://plntfdb.bio.uni-potsdam.de/v3.0/fam_mem.php?family_id=C2C2-CO-like
Ghir_D09G013110	MYB	Myb_DNA-binding	ARID,Response_reg,SNF2_N	http://plntfdb.bio.uni-potsdam.de/v3.0/fam_mem.php?family_id=MYB
Ghir_D05G016160	ARF	Auxin_resp	-	http://plntfdb.bio.uni-potsdam.de/v3.0/fam_mem.php?family_id=ARF
Ghir_A05G017200	MYB	Myb_DNA-binding	ARID,Response_reg,SNF2_N	http://plntfdb.bio.uni-potsdam.de/v3.0/fam_mem.php?family_id=MYB
Ghir_D09G025190	GRAS	GRAS	-	http://plntfdb.bio.uni-potsdam.de/v3.0/fam_mem.php?family_id=GRAS
Ghir_D06G009040	MADS	SRF-TF	-	http://plntfdb.bio.uni-potsdam.de/v3.0/fam_mem.php?family_id=MADS
Ghir_D04G020630	MADS	SRF-TF	-	http://plntfdb.bio.uni-potsdam.de/v3.0/fam_mem.php?family_id=MADS
Ghir_D12G015530	C3H	zf-CCCH	PHD,SNF2_N,zf-C2H2	http://plntfdb.bio.uni-potsdam.de/v3.0/fam_mem.php?family_id=C3H
Ghir_A03G000520	PLATZ	PLATZ	-	http://plntfdb.bio.uni-potsdam.de/v3.0/fam_mem.php?family_id=PLATZ
Ghir_D11G001070	MYB	Myb_DNA-binding	ARID,Response_reg,SNF2_N	http://plntfdb.bio.uni-potsdam.de/v3.0/fam_mem.php?family_id=MYB
Ghir_D07G011740	C2H2	zf-C2H2	PHD	http://plntfdb.bio.uni-potsdam.de/v3.0/fam_mem.php?family_id=C2H2
Ghir_D05G010780	G2-like	G2-like	Response_reg	http://plntfdb.bio.uni-potsdam.de/v3.0/fam_mem.php?family_id=G2-like
Ghir_D02G012990	G2-like	G2-like	Response_reg	http://plntfdb.bio.uni-potsdam.de/v3.0/fam_mem.php?family_id=G2-like
Ghir_A02G018010	C2H2	zf-C2H2	PHD	http://plntfdb.bio.uni-potsdam.de/v3.0/fam_mem.php?family_id=C2H2
Ghir_A10G014010	FAR1	FAR1	-	http://plntfdb.bio.uni-potsdam.de/v3.0/fam_mem.php?family_id=FAR1
BGI_novel_G002177	HRT	HRT	-	http://plntfdb.bio.uni-potsdam.de/v3.0/fam_mem.php?family_id=HRT
Ghir_A06G021330	BES1	DUF822	-	http://plntfdb.bio.uni-potsdam.de/v3.0/fam_mem.php?family_id=BES1
Ghir_D03G007700	AP2-EREBP	AP2	-	http://plntfdb.bio.uni-potsdam.de/v3.0/fam_mem.php?family_id=AP2-EREBP
Ghir_D05G009410	MYB	Myb_DNA-binding	ARID,Response_reg,SNF2_N	http://plntfdb.bio.uni-potsdam.de/v3.0/fam_mem.php?family_id=MYB
Ghir_A08G025360	HSF	HSF_DNA-bind	-	http://plntfdb.bio.uni-potsdam.de/v3.0/fam_mem.php?family_id=HSF
Ghir_D08G006860	bHLH	HLH	-	http://plntfdb.bio.uni-potsdam.de/v3.0/fam_mem.php?family_id=bHLH
Ghir_D09G001590	FAR1	FAR1	-	http://plntfdb.bio.uni-potsdam.de/v3.0/fam_mem.php?family_id=FAR1
Ghir_D09G009660	MYB	Myb_DNA-binding	ARID,Response_reg,SNF2_N	http://plntfdb.bio.uni-potsdam.de/v3.0/fam_mem.php?family_id=MYB
Ghir_D06G009180	Alfin-like	Alfin-like	DDT,Homeobox,JmjC,JmjN	http://plntfdb.bio.uni-potsdam.de/v3.0/fam_mem.php?family_id=Alfin-like
Ghir_D08G026390	AP2-EREBP	AP2	-	http://plntfdb.bio.uni-potsdam.de/v3.0/fam_mem.php?family_id=AP2-EREBP
Ghir_D08G027980	AP2-EREBP	AP2	-	http://plntfdb.bio.uni-potsdam.de/v3.0/fam_mem.php?family_id=AP2-EREBP
Ghir_A13G008540	WRKY	WRKY	-	http://plntfdb.bio.uni-potsdam.de/v3.0/fam_mem.php?family_id=WRKY
Ghir_D02G004320	AP2-EREBP	AP2	-	http://plntfdb.bio.uni-potsdam.de/v3.0/fam_mem.php?family_id=AP2-EREBP
Ghir_A05G003070	C2C2-GATA	GATA	-	http://plntfdb.bio.uni-potsdam.de/v3.0/fam_mem.php?family_id=C2C2-GATA
Ghir_A07G023000	GRAS	GRAS	-	http://plntfdb.bio.uni-potsdam.de/v3.0/fam_mem.php?family_id=GRAS
BGI_novel_G001575	VOZ	VOZ	-	http://plntfdb.bio.uni-potsdam.de/v3.0/fam_mem.php?family_id=VOZ
Ghir_A01G020810	S1Fa-like	S1FA	-	http://plntfdb.bio.uni-potsdam.de/v3.0/fam_mem.php?family_id=S1Fa-like
Ghir_D12G028650	C2H2	zf-C2H2	PHD	http://plntfdb.bio.uni-potsdam.de/v3.0/fam_mem.php?family_id=C2H2
Ghir_D07G000660	CPP	TCR	-	http://plntfdb.bio.uni-potsdam.de/v3.0/fam_mem.php?family_id=CPP
Ghir_D09G024700.1	WRKY	WRKY	-	http://plntfdb.bio.uni-potsdam.de/v3.0/fam_mem.php?family_id=WRKY
Ghir_D11G024930.1	MYB	Myb_DNA-binding	ARID,Response_reg,SNF2_N	http://plntfdb.bio.uni-potsdam.de/v3.0/fam_mem.php?family_id=MYB
BGI_novel_G007628	mTERF	mTERF	-	http://plntfdb.bio.uni-potsdam.de/v3.0/fam_mem.php?family_id=mTERF
Ghir_A08G018760.1	HSF	HSF_DNA-bind	-	http://plntfdb.bio.uni-potsdam.de/v3.0/fam_mem.php?family_id=HSF
Ghir_D04G017990	MYB	Myb_DNA-binding	ARID,Response_reg,SNF2_N	http://plntfdb.bio.uni-potsdam.de/v3.0/fam_mem.php?family_id=MYB
Ghir_A02G004890	mTERF	mTERF	-	http://plntfdb.bio.uni-potsdam.de/v3.0/fam_mem.php?family_id=mTERF
Ghir_A01G020110	AP2-EREBP	AP2	-	http://plntfdb.bio.uni-potsdam.de/v3.0/fam_mem.php?family_id=AP2-EREBP
Ghir_D11G014450.1	bHLH	HLH	-	http://plntfdb.bio.uni-potsdam.de/v3.0/fam_mem.php?family_id=bHLH
Ghir_D05G004470.1	C2H2	zf-C2H2	PHD	http://plntfdb.bio.uni-potsdam.de/v3.0/fam_mem.php?family_id=C2H2
Ghir_A05G016570	C2C2-Dof	zf-Dof	-	http://plntfdb.bio.uni-potsdam.de/v3.0/fam_mem.php?family_id=C2C2-Dof
Ghir_A08G010630	C2C2-Dof	zf-Dof	-	http://plntfdb.bio.uni-potsdam.de/v3.0/fam_mem.php?family_id=C2C2-Dof
Ghir_D09G012940	bHLH	HLH	-	http://plntfdb.bio.uni-potsdam.de/v3.0/fam_mem.php?family_id=bHLH
Ghir_A09G015820	ARF	Auxin_resp	-	http://plntfdb.bio.uni-potsdam.de/v3.0/fam_mem.php?family_id=ARF
Ghir_A09G000450	NAC	NAM	-	http://plntfdb.bio.uni-potsdam.de/v3.0/fam_mem.php?family_id=NAC
Ghir_A04G014070	bHLH	HLH	-	http://plntfdb.bio.uni-potsdam.de/v3.0/fam_mem.php?family_id=bHLH
Ghir_A08G019700	C3H	zf-CCCH	PHD,SNF2_N,zf-C2H2	http://plntfdb.bio.uni-potsdam.de/v3.0/fam_mem.php?family_id=C3H
BGI_novel_G007007	EIL	EIN3	-	http://plntfdb.bio.uni-potsdam.de/v3.0/fam_mem.php?family_id=EIL
Ghir_D03G015780	WRKY	WRKY	-	http://plntfdb.bio.uni-potsdam.de/v3.0/fam_mem.php?family_id=WRKY
Ghir_A08G021170	GRAS	GRAS	-	http://plntfdb.bio.uni-potsdam.de/v3.0/fam_mem.php?family_id=GRAS
Ghir_A04G015960.1	G2-like	G2-like	Response_reg	http://plntfdb.bio.uni-potsdam.de/v3.0/fam_mem.php?family_id=G2-like
BGI_novel_G007636	TUB	Tub	-	http://plntfdb.bio.uni-potsdam.de/v3.0/fam_mem.php?family_id=TUB
Ghir_A09G024080	AP2-EREBP	AP2	-	http://plntfdb.bio.uni-potsdam.de/v3.0/fam_mem.php?family_id=AP2-EREBP
Ghir_A09G012570	C2H2	zf-C2H2	PHD	http://plntfdb.bio.uni-potsdam.de/v3.0/fam_mem.php?family_id=C2H2
Ghir_A09G009670	bHLH	HLH	-	http://plntfdb.bio.uni-potsdam.de/v3.0/fam_mem.php?family_id=bHLH
Ghir_D05G016580	C2C2-Dof	zf-Dof	-	http://plntfdb.bio.uni-potsdam.de/v3.0/fam_mem.php?family_id=C2C2-Dof
Ghir_D05G031530	bHLH	HLH	-	http://plntfdb.bio.uni-potsdam.de/v3.0/fam_mem.php?family_id=bHLH
Ghir_A10G009380	MYB	Myb_DNA-binding	ARID,Response_reg,SNF2_N	http://plntfdb.bio.uni-potsdam.de/v3.0/fam_mem.php?family_id=MYB
Ghir_A08G003340	C3H	zf-CCCH	PHD,SNF2_N,zf-C2H2	http://plntfdb.bio.uni-potsdam.de/v3.0/fam_mem.php?family_id=C3H
Ghir_D05G014990	TCP	TCP	-	http://plntfdb.bio.uni-potsdam.de/v3.0/fam_mem.php?family_id=TCP
Ghir_D12G024160	Alfin-like	Alfin-like	DDT,Homeobox,JmjC,JmjN	http://plntfdb.bio.uni-potsdam.de/v3.0/fam_mem.php?family_id=Alfin-like
Ghir_D11G011830	MYB	Myb_DNA-binding	ARID,Response_reg,SNF2_N	http://plntfdb.bio.uni-potsdam.de/v3.0/fam_mem.php?family_id=MYB
Ghir_D09G018330	TCP	TCP	-	http://plntfdb.bio.uni-potsdam.de/v3.0/fam_mem.php?family_id=TCP
Ghir_A13G004830	MADS	SRF-TF	-	http://plntfdb.bio.uni-potsdam.de/v3.0/fam_mem.php?family_id=MADS
Ghir_D03G000370.1	NAC	NAM	-	http://plntfdb.bio.uni-potsdam.de/v3.0/fam_mem.php?family_id=NAC
Ghir_A09G011760	SRS	DUF702	-	http://plntfdb.bio.uni-potsdam.de/v3.0/fam_mem.php?family_id=SRS
Ghir_A02G017530	C2C2-Dof	zf-Dof	-	http://plntfdb.bio.uni-potsdam.de/v3.0/fam_mem.php?family_id=C2C2-Dof
Ghir_D08G014260.1	bZIP	bZIP_1,bZIP_2,bZIP_Maf	HLH	http://plntfdb.bio.uni-potsdam.de/v3.0/fam_mem.php?family_id=bZIP
Ghir_A01G014760	WRKY	WRKY	-	http://plntfdb.bio.uni-potsdam.de/v3.0/fam_mem.php?family_id=WRKY
Ghir_D07G014960	MYB	Myb_DNA-binding	ARID,Response_reg,SNF2_N	http://plntfdb.bio.uni-potsdam.de/v3.0/fam_mem.php?family_id=MYB
Ghir_D03G000920	bHLH	HLH	-	http://plntfdb.bio.uni-potsdam.de/v3.0/fam_mem.php?family_id=bHLH
Ghir_D05G026430.1	BES1	DUF822	-	http://plntfdb.bio.uni-potsdam.de/v3.0/fam_mem.php?family_id=BES1
Ghir_D02G020530	TIG	TIG	-	http://plntfdb.bio.uni-potsdam.de/v3.0/fam_mem.php?family_id=TIG
BGI_novel_G001406	LIM	LIM	-	http://plntfdb.bio.uni-potsdam.de/v3.0/fam_mem.php?family_id=LIM
Ghir_D07G008940	NAC	NAM	-	http://plntfdb.bio.uni-potsdam.de/v3.0/fam_mem.php?family_id=NAC
Ghir_D12G025420	GRF	QLQ,WRC	-	http://plntfdb.bio.uni-potsdam.de/v3.0/fam_mem.php?family_id=GRF
Ghir_A03G003040.1	ABI3VP1	B3	AP2,Auxin_resp	http://plntfdb.bio.uni-potsdam.de/v3.0/fam_mem.php?family_id=ABI3VP1
Ghir_D13G001470	GRAS	GRAS	-	http://plntfdb.bio.uni-potsdam.de/v3.0/fam_mem.php?family_id=GRAS
Ghir_D05G032120	Trihelix	trihelix	-	http://plntfdb.bio.uni-potsdam.de/v3.0/fam_mem.php?family_id=Trihelix
Ghir_A09G022110	bZIP	bZIP_1,bZIP_2,bZIP_Maf	HLH	http://plntfdb.bio.uni-potsdam.de/v3.0/fam_mem.php?family_id=bZIP
Ghir_D05G020800	bHLH	HLH	-	http://plntfdb.bio.uni-potsdam.de/v3.0/fam_mem.php?family_id=bHLH
Ghir_D12G012940	ABI3VP1	B3	AP2,Auxin_resp	http://plntfdb.bio.uni-potsdam.de/v3.0/fam_mem.php?family_id=ABI3VP1
Ghir_A13G013710	mTERF	mTERF	-	http://plntfdb.bio.uni-potsdam.de/v3.0/fam_mem.php?family_id=mTERF
Ghir_A01G002890	ARR-B	G2-like,Myb_DNA-binding,Response_reg	CCT	http://plntfdb.bio.uni-potsdam.de/v3.0/fam_mem.php?family_id=ARR-B
Ghir_A05G029770	NAC	NAM	-	http://plntfdb.bio.uni-potsdam.de/v3.0/fam_mem.php?family_id=NAC
Ghir_A06G000860	TUB	Tub	-	http://plntfdb.bio.uni-potsdam.de/v3.0/fam_mem.php?family_id=TUB
Ghir_A03G016330	LOB	DUF260	-	http://plntfdb.bio.uni-potsdam.de/v3.0/fam_mem.php?family_id=LOB
Ghir_A11G005430	TAZ	zf-TAZ	PHD	http://plntfdb.bio.uni-potsdam.de/v3.0/fam_mem.php?family_id=TAZ
Ghir_A13G010320	MYB	Myb_DNA-binding	ARID,Response_reg,SNF2_N	http://plntfdb.bio.uni-potsdam.de/v3.0/fam_mem.php?family_id=MYB
Ghir_A11G023020	LOB	DUF260	-	http://plntfdb.bio.uni-potsdam.de/v3.0/fam_mem.php?family_id=LOB
Ghir_D06G023210	NAC	NAM	-	http://plntfdb.bio.uni-potsdam.de/v3.0/fam_mem.php?family_id=NAC
Ghir_D13G006460	C2C2-CO-like	CCT,zf-B_box	GATA,PLATZ	http://plntfdb.bio.uni-potsdam.de/v3.0/fam_mem.php?family_id=C2C2-CO-like
Ghir_D05G001450	DBP	DNC,PP2C	-	http://plntfdb.bio.uni-potsdam.de/v3.0/fam_mem.php?family_id=DBP
Ghir_D09G015400	C2H2	zf-C2H2	PHD	http://plntfdb.bio.uni-potsdam.de/v3.0/fam_mem.php?family_id=C2H2
Ghir_A06G001380	G2-like	G2-like	Response_reg	http://plntfdb.bio.uni-potsdam.de/v3.0/fam_mem.php?family_id=G2-like
Ghir_A06G013240	C2C2-Dof	zf-Dof	-	http://plntfdb.bio.uni-potsdam.de/v3.0/fam_mem.php?family_id=C2C2-Dof
Ghir_D05G004010	Tify	tify	GATA	http://plntfdb.bio.uni-potsdam.de/v3.0/fam_mem.php?family_id=Tify
Ghir_A13G008990.1	C3H	zf-CCCH	PHD,SNF2_N,zf-C2H2	http://plntfdb.bio.uni-potsdam.de/v3.0/fam_mem.php?family_id=C3H
Ghir_D02G005190	mTERF	mTERF	-	http://plntfdb.bio.uni-potsdam.de/v3.0/fam_mem.php?family_id=mTERF
Ghir_A09G014600	HSF	HSF_DNA-bind	-	http://plntfdb.bio.uni-potsdam.de/v3.0/fam_mem.php?family_id=HSF
Ghir_D08G023040	G2-like	G2-like	Response_reg	http://plntfdb.bio.uni-potsdam.de/v3.0/fam_mem.php?family_id=G2-like
BGI_novel_G006226	MYB	Myb_DNA-binding	ARID,Response_reg,SNF2_N	http://plntfdb.bio.uni-potsdam.de/v3.0/fam_mem.php?family_id=MYB
Ghir_D04G001310	WRKY	WRKY	-	http://plntfdb.bio.uni-potsdam.de/v3.0/fam_mem.php?family_id=WRKY
Ghir_A11G000140	MYB	Myb_DNA-binding	ARID,Response_reg,SNF2_N	http://plntfdb.bio.uni-potsdam.de/v3.0/fam_mem.php?family_id=MYB
Ghir_D01G014480	FAR1	FAR1	-	http://plntfdb.bio.uni-potsdam.de/v3.0/fam_mem.php?family_id=FAR1
Ghir_A12G027600	bHLH	HLH	-	http://plntfdb.bio.uni-potsdam.de/v3.0/fam_mem.php?family_id=bHLH
Ghir_A11G008790	LOB	DUF260	-	http://plntfdb.bio.uni-potsdam.de/v3.0/fam_mem.php?family_id=LOB
Ghir_A06G002010	WRKY	WRKY	-	http://plntfdb.bio.uni-potsdam.de/v3.0/fam_mem.php?family_id=WRKY
Ghir_D06G011870.1	NAC	NAM	-	http://plntfdb.bio.uni-potsdam.de/v3.0/fam_mem.php?family_id=NAC
BGI_novel_G000236	mTERF	mTERF	-	http://plntfdb.bio.uni-potsdam.de/v3.0/fam_mem.php?family_id=mTERF
Ghir_D07G013250	C3H	zf-CCCH	PHD,SNF2_N,zf-C2H2	http://plntfdb.bio.uni-potsdam.de/v3.0/fam_mem.php?family_id=C3H
Ghir_A01G011320	bHLH	HLH	-	http://plntfdb.bio.uni-potsdam.de/v3.0/fam_mem.php?family_id=bHLH
Ghir_A09G013390.1	bHLH	HLH	-	http://plntfdb.bio.uni-potsdam.de/v3.0/fam_mem.php?family_id=bHLH
Ghir_A10G002200	HSF	HSF_DNA-bind	-	http://plntfdb.bio.uni-potsdam.de/v3.0/fam_mem.php?family_id=HSF
Ghir_D08G006490	AP2-EREBP	AP2	-	http://plntfdb.bio.uni-potsdam.de/v3.0/fam_mem.php?family_id=AP2-EREBP
Ghir_D12G021340	BES1	DUF822	-	http://plntfdb.bio.uni-potsdam.de/v3.0/fam_mem.php?family_id=BES1
Ghir_A05G009220	MYB	Myb_DNA-binding	ARID,Response_reg,SNF2_N	http://plntfdb.bio.uni-potsdam.de/v3.0/fam_mem.php?family_id=MYB
Ghir_D09G014970	E2F-DP	E2F_TDP	-	http://plntfdb.bio.uni-potsdam.de/v3.0/fam_mem.php?family_id=E2F-DP
Ghir_D02G001440	NAC	NAM	-	http://plntfdb.bio.uni-potsdam.de/v3.0/fam_mem.php?family_id=NAC
Ghir_A08G017420	AP2-EREBP	AP2	-	http://plntfdb.bio.uni-potsdam.de/v3.0/fam_mem.php?family_id=AP2-EREBP
Ghir_D09G009830.1	C3H	zf-CCCH	PHD,SNF2_N,zf-C2H2	http://plntfdb.bio.uni-potsdam.de/v3.0/fam_mem.php?family_id=C3H
Ghir_D06G009590	C2C2-GATA	GATA	-	http://plntfdb.bio.uni-potsdam.de/v3.0/fam_mem.php?family_id=C2C2-GATA
Ghir_A02G017610	ABI3VP1	B3	AP2,Auxin_resp	http://plntfdb.bio.uni-potsdam.de/v3.0/fam_mem.php?family_id=ABI3VP1
Ghir_D11G020090	ABI3VP1	B3	AP2,Auxin_resp	http://plntfdb.bio.uni-potsdam.de/v3.0/fam_mem.php?family_id=ABI3VP1
Ghir_A07G008450	MYB	Myb_DNA-binding	ARID,Response_reg,SNF2_N	http://plntfdb.bio.uni-potsdam.de/v3.0/fam_mem.php?family_id=MYB
Ghir_D08G007600	BSD	BSD	-	http://plntfdb.bio.uni-potsdam.de/v3.0/fam_mem.php?family_id=BSD
Ghir_D07G007100.1	C3H	zf-CCCH	PHD,SNF2_N,zf-C2H2	http://plntfdb.bio.uni-potsdam.de/v3.0/fam_mem.php?family_id=C3H
Ghir_A12G013220	MYB	Myb_DNA-binding	ARID,Response_reg,SNF2_N	http://plntfdb.bio.uni-potsdam.de/v3.0/fam_mem.php?family_id=MYB
Ghir_A07G009080	WRKY	WRKY	-	http://plntfdb.bio.uni-potsdam.de/v3.0/fam_mem.php?family_id=WRKY
Ghir_A04G012780	mTERF	mTERF	-	http://plntfdb.bio.uni-potsdam.de/v3.0/fam_mem.php?family_id=mTERF
Ghir_A02G007560	MYB	Myb_DNA-binding	ARID,Response_reg,SNF2_N	http://plntfdb.bio.uni-potsdam.de/v3.0/fam_mem.php?family_id=MYB
Ghir_A10G004850	MADS	SRF-TF	-	http://plntfdb.bio.uni-potsdam.de/v3.0/fam_mem.php?family_id=MADS
Ghir_D09G008630	AP2-EREBP	AP2	-	http://plntfdb.bio.uni-potsdam.de/v3.0/fam_mem.php?family_id=AP2-EREBP
Ghir_A05G015840	WRKY	WRKY	-	http://plntfdb.bio.uni-potsdam.de/v3.0/fam_mem.php?family_id=WRKY
Ghir_A01G019150	Trihelix	trihelix	-	http://plntfdb.bio.uni-potsdam.de/v3.0/fam_mem.php?family_id=Trihelix
Ghir_A09G001670	zf-HD	ZF-HD_dimer	-	http://plntfdb.bio.uni-potsdam.de/v3.0/fam_mem.php?family_id=zf-HD
Ghir_D01G015030	Trihelix	trihelix	-	http://plntfdb.bio.uni-potsdam.de/v3.0/fam_mem.php?family_id=Trihelix
Ghir_D04G020640	MADS	SRF-TF	-	http://plntfdb.bio.uni-potsdam.de/v3.0/fam_mem.php?family_id=MADS
Ghir_D11G000220	MYB	Myb_DNA-binding	ARID,Response_reg,SNF2_N	http://plntfdb.bio.uni-potsdam.de/v3.0/fam_mem.php?family_id=MYB
Ghir_D05G009220	MYB	Myb_DNA-binding	ARID,Response_reg,SNF2_N	http://plntfdb.bio.uni-potsdam.de/v3.0/fam_mem.php?family_id=MYB
Ghir_D13G024630	ABI3VP1	B3	AP2,Auxin_resp	http://plntfdb.bio.uni-potsdam.de/v3.0/fam_mem.php?family_id=ABI3VP1
Ghir_A01G003240	NAC	NAM	-	http://plntfdb.bio.uni-potsdam.de/v3.0/fam_mem.php?family_id=NAC
Ghir_A11G008420	SBP	SBP	-	http://plntfdb.bio.uni-potsdam.de/v3.0/fam_mem.php?family_id=SBP
Ghir_D04G017570	ABI3VP1	B3	AP2,Auxin_resp	http://plntfdb.bio.uni-potsdam.de/v3.0/fam_mem.php?family_id=ABI3VP1
Ghir_D09G022590	HSF	HSF_DNA-bind	-	http://plntfdb.bio.uni-potsdam.de/v3.0/fam_mem.php?family_id=HSF
Ghir_A05G034730	C2C2-CO-like	CCT,zf-B_box	GATA,PLATZ	http://plntfdb.bio.uni-potsdam.de/v3.0/fam_mem.php?family_id=C2C2-CO-like
Ghir_D02G008050	NAC	NAM	-	http://plntfdb.bio.uni-potsdam.de/v3.0/fam_mem.php?family_id=NAC
Ghir_D07G006290	AP2-EREBP	AP2	-	http://plntfdb.bio.uni-potsdam.de/v3.0/fam_mem.php?family_id=AP2-EREBP
Ghir_A13G011020	GeBP	DUF573	-	http://plntfdb.bio.uni-potsdam.de/v3.0/fam_mem.php?family_id=GeBP
Ghir_D02G011780	MYB	Myb_DNA-binding	ARID,Response_reg,SNF2_N	http://plntfdb.bio.uni-potsdam.de/v3.0/fam_mem.php?family_id=MYB
Ghir_D09G015280	ARF	Auxin_resp	-	http://plntfdb.bio.uni-potsdam.de/v3.0/fam_mem.php?family_id=ARF
Ghir_A11G018890.2	FHA	FHA	-	http://plntfdb.bio.uni-potsdam.de/v3.0/fam_mem.php?family_id=FHA
Ghir_D06G011870	NAC	NAM	-	http://plntfdb.bio.uni-potsdam.de/v3.0/fam_mem.php?family_id=NAC
Ghir_A06G008280	Tify	tify	GATA	http://plntfdb.bio.uni-potsdam.de/v3.0/fam_mem.php?family_id=Tify
Ghir_D03G002220	AP2-EREBP	AP2	-	http://plntfdb.bio.uni-potsdam.de/v3.0/fam_mem.php?family_id=AP2-EREBP
Ghir_D11G020480.2	FHA	FHA	-	http://plntfdb.bio.uni-potsdam.de/v3.0/fam_mem.php?family_id=FHA
Ghir_A05G041810.1	AP2-EREBP	AP2	-	http://plntfdb.bio.uni-potsdam.de/v3.0/fam_mem.php?family_id=AP2-EREBP
Ghir_D07G023190	bHLH	HLH	-	http://plntfdb.bio.uni-potsdam.de/v3.0/fam_mem.php?family_id=bHLH
BGI_novel_G003406	AP2-EREBP	AP2	-	http://plntfdb.bio.uni-potsdam.de/v3.0/fam_mem.php?family_id=AP2-EREBP
Ghir_A05G006130	WRKY	WRKY	-	http://plntfdb.bio.uni-potsdam.de/v3.0/fam_mem.php?family_id=WRKY
Ghir_D09G018270	bHLH	HLH	-	http://plntfdb.bio.uni-potsdam.de/v3.0/fam_mem.php?family_id=bHLH
Ghir_D09G018480	GRAS	GRAS	-	http://plntfdb.bio.uni-potsdam.de/v3.0/fam_mem.php?family_id=GRAS
Ghir_A11G035010.1	MYB	Myb_DNA-binding	ARID,Response_reg,SNF2_N	http://plntfdb.bio.uni-potsdam.de/v3.0/fam_mem.php?family_id=MYB
Ghir_D12G010610	AP2-EREBP	AP2	-	http://plntfdb.bio.uni-potsdam.de/v3.0/fam_mem.php?family_id=AP2-EREBP
Ghir_A04G013590	MYB	Myb_DNA-binding	ARID,Response_reg,SNF2_N	http://plntfdb.bio.uni-potsdam.de/v3.0/fam_mem.php?family_id=MYB
Ghir_A11G005170	G2-like	G2-like	Response_reg	http://plntfdb.bio.uni-potsdam.de/v3.0/fam_mem.php?family_id=G2-like
Ghir_D09G019260.1	RWP-RK	RWP-RK	-	http://plntfdb.bio.uni-potsdam.de/v3.0/fam_mem.php?family_id=RWP-RK
Ghir_D03G010860	C2C2-Dof	zf-Dof	-	http://plntfdb.bio.uni-potsdam.de/v3.0/fam_mem.php?family_id=C2C2-Dof
Ghir_D03G003060	BSD	BSD	-	http://plntfdb.bio.uni-potsdam.de/v3.0/fam_mem.php?family_id=BSD
Ghir_A11G018870	C2C2-GATA	GATA	-	http://plntfdb.bio.uni-potsdam.de/v3.0/fam_mem.php?family_id=C2C2-GATA
Ghir_A04G015840	SBP	SBP	-	http://plntfdb.bio.uni-potsdam.de/v3.0/fam_mem.php?family_id=SBP
Ghir_A01G020650	MYB	Myb_DNA-binding	ARID,Response_reg,SNF2_N	http://plntfdb.bio.uni-potsdam.de/v3.0/fam_mem.php?family_id=MYB
Ghir_D06G003190.2	MADS	SRF-TF	-	http://plntfdb.bio.uni-potsdam.de/v3.0/fam_mem.php?family_id=MADS
Ghir_D09G007870	AP2-EREBP	AP2	-	http://plntfdb.bio.uni-potsdam.de/v3.0/fam_mem.php?family_id=AP2-EREBP
Ghir_A10G014000	FAR1	FAR1	-	http://plntfdb.bio.uni-potsdam.de/v3.0/fam_mem.php?family_id=FAR1
Ghir_D06G012230	EIL	EIN3	-	http://plntfdb.bio.uni-potsdam.de/v3.0/fam_mem.php?family_id=EIL
Ghir_D13G003420	MYB	Myb_DNA-binding	ARID,Response_reg,SNF2_N	http://plntfdb.bio.uni-potsdam.de/v3.0/fam_mem.php?family_id=MYB
Ghir_D12G022710	AP2-EREBP	AP2	-	http://plntfdb.bio.uni-potsdam.de/v3.0/fam_mem.php?family_id=AP2-EREBP
Ghir_D06G002410	bHLH	HLH	-	http://plntfdb.bio.uni-potsdam.de/v3.0/fam_mem.php?family_id=bHLH
Ghir_D07G002110.1	MYB	Myb_DNA-binding	ARID,Response_reg,SNF2_N	http://plntfdb.bio.uni-potsdam.de/v3.0/fam_mem.php?family_id=MYB
Ghir_D02G015260	SBP	SBP	-	http://plntfdb.bio.uni-potsdam.de/v3.0/fam_mem.php?family_id=SBP
Ghir_A02G009320	RWP-RK	RWP-RK	-	http://plntfdb.bio.uni-potsdam.de/v3.0/fam_mem.php?family_id=RWP-RK
Ghir_A09G009950	AP2-EREBP	AP2	-	http://plntfdb.bio.uni-potsdam.de/v3.0/fam_mem.php?family_id=AP2-EREBP
Ghir_A10G023300	MYB	Myb_DNA-binding	ARID,Response_reg,SNF2_N	http://plntfdb.bio.uni-potsdam.de/v3.0/fam_mem.php?family_id=MYB
Ghir_D02G022460	ABI3VP1	B3	AP2,Auxin_resp	http://plntfdb.bio.uni-potsdam.de/v3.0/fam_mem.php?family_id=ABI3VP1
Ghir_A12G027800	TCP	TCP	-	http://plntfdb.bio.uni-potsdam.de/v3.0/fam_mem.php?family_id=TCP
Ghir_A07G013540	MYB	Myb_DNA-binding	ARID,Response_reg,SNF2_N	http://plntfdb.bio.uni-potsdam.de/v3.0/fam_mem.php?family_id=MYB
Ghir_D02G008050.1	NAC	NAM	-	http://plntfdb.bio.uni-potsdam.de/v3.0/fam_mem.php?family_id=NAC
Ghir_A02G009910	AP2-EREBP	AP2	-	http://plntfdb.bio.uni-potsdam.de/v3.0/fam_mem.php?family_id=AP2-EREBP
Ghir_A05G035940	MYB	Myb_DNA-binding	ARID,Response_reg,SNF2_N	http://plntfdb.bio.uni-potsdam.de/v3.0/fam_mem.php?family_id=MYB
Ghir_A09G020850.1	bHLH	HLH	-	http://plntfdb.bio.uni-potsdam.de/v3.0/fam_mem.php?family_id=bHLH
Ghir_A09G010490	MYB	Myb_DNA-binding	ARID,Response_reg,SNF2_N	http://plntfdb.bio.uni-potsdam.de/v3.0/fam_mem.php?family_id=MYB
Ghir_A02G018180	MYB	Myb_DNA-binding	ARID,Response_reg,SNF2_N	http://plntfdb.bio.uni-potsdam.de/v3.0/fam_mem.php?family_id=MYB
Ghir_A10G024330	LOB	DUF260	-	http://plntfdb.bio.uni-potsdam.de/v3.0/fam_mem.php?family_id=LOB
Ghir_D12G023990	LIM	LIM	-	http://plntfdb.bio.uni-potsdam.de/v3.0/fam_mem.php?family_id=LIM
Ghir_D10G018040	mTERF	mTERF	-	http://plntfdb.bio.uni-potsdam.de/v3.0/fam_mem.php?family_id=mTERF
Ghir_A13G006570	NAC	NAM	-	http://plntfdb.bio.uni-potsdam.de/v3.0/fam_mem.php?family_id=NAC
Ghir_D03G013870	C2C2-Dof	zf-Dof	-	http://plntfdb.bio.uni-potsdam.de/v3.0/fam_mem.php?family_id=C2C2-Dof
Ghir_D10G015140	G2-like	G2-like	Response_reg	http://plntfdb.bio.uni-potsdam.de/v3.0/fam_mem.php?family_id=G2-like
Ghir_D04G020390.1	BBR/BPC	GAGA_bind	-	http://plntfdb.bio.uni-potsdam.de/v3.0/fam_mem.php?family_id=BBR/BPC
Ghir_A08G000510	GRAS	GRAS	-	http://plntfdb.bio.uni-potsdam.de/v3.0/fam_mem.php?family_id=GRAS
Ghir_A05G021060	WRKY	WRKY	-	http://plntfdb.bio.uni-potsdam.de/v3.0/fam_mem.php?family_id=WRKY
Ghir_D08G020340	bHLH	HLH	-	http://plntfdb.bio.uni-potsdam.de/v3.0/fam_mem.php?family_id=bHLH
Ghir_D06G012430	AP2-EREBP	AP2	-	http://plntfdb.bio.uni-potsdam.de/v3.0/fam_mem.php?family_id=AP2-EREBP
Ghir_A11G003180.1	HSF	HSF_DNA-bind	-	http://plntfdb.bio.uni-potsdam.de/v3.0/fam_mem.php?family_id=HSF
Ghir_D02G024640	ABI3VP1	B3	AP2,Auxin_resp	http://plntfdb.bio.uni-potsdam.de/v3.0/fam_mem.php?family_id=ABI3VP1
Ghir_D12G010510	SBP	SBP	-	http://plntfdb.bio.uni-potsdam.de/v3.0/fam_mem.php?family_id=SBP
Ghir_A06G017380	LOB	DUF260	-	http://plntfdb.bio.uni-potsdam.de/v3.0/fam_mem.php?family_id=LOB
Ghir_D12G007030	C2C2-Dof	zf-Dof	-	http://plntfdb.bio.uni-potsdam.de/v3.0/fam_mem.php?family_id=C2C2-Dof
Ghir_D11G033300	LOB	DUF260	-	http://plntfdb.bio.uni-potsdam.de/v3.0/fam_mem.php?family_id=LOB
Ghir_D12G009380	bHLH	HLH	-	http://plntfdb.bio.uni-potsdam.de/v3.0/fam_mem.php?family_id=bHLH
Ghir_A02G018230	zf-HD	ZF-HD_dimer	-	http://plntfdb.bio.uni-potsdam.de/v3.0/fam_mem.php?family_id=zf-HD
Ghir_D12G019130.2	MADS	SRF-TF	-	http://plntfdb.bio.uni-potsdam.de/v3.0/fam_mem.php?family_id=MADS
BGI_novel_G000320	GRAS	GRAS	-	http://plntfdb.bio.uni-potsdam.de/v3.0/fam_mem.php?family_id=GRAS
Ghir_A05G012570	FAR1	FAR1	-	http://plntfdb.bio.uni-potsdam.de/v3.0/fam_mem.php?family_id=FAR1
Ghir_A07G019950.1	Alfin-like	Alfin-like	DDT,Homeobox,JmjC,JmjN	http://plntfdb.bio.uni-potsdam.de/v3.0/fam_mem.php?family_id=Alfin-like
Ghir_A11G002600	ARF	Auxin_resp	-	http://plntfdb.bio.uni-potsdam.de/v3.0/fam_mem.php?family_id=ARF
Ghir_A07G011950	E2F-DP	E2F_TDP	-	http://plntfdb.bio.uni-potsdam.de/v3.0/fam_mem.php?family_id=E2F-DP
Ghir_A10G002300	bHLH	HLH	-	http://plntfdb.bio.uni-potsdam.de/v3.0/fam_mem.php?family_id=bHLH
Ghir_D12G005640	C3H	zf-CCCH	PHD,SNF2_N,zf-C2H2	http://plntfdb.bio.uni-potsdam.de/v3.0/fam_mem.php?family_id=C3H
Ghir_A04G007850	MYB	Myb_DNA-binding	ARID,Response_reg,SNF2_N	http://plntfdb.bio.uni-potsdam.de/v3.0/fam_mem.php?family_id=MYB
Ghir_D05G016090	AP2-EREBP	AP2	-	http://plntfdb.bio.uni-potsdam.de/v3.0/fam_mem.php?family_id=AP2-EREBP
Ghir_D11G026340	MYB	Myb_DNA-binding	ARID,Response_reg,SNF2_N	http://plntfdb.bio.uni-potsdam.de/v3.0/fam_mem.php?family_id=MYB
Ghir_A04G006560	TCP	TCP	-	http://plntfdb.bio.uni-potsdam.de/v3.0/fam_mem.php?family_id=TCP
Ghir_A12G005510	LOB	DUF260	-	http://plntfdb.bio.uni-potsdam.de/v3.0/fam_mem.php?family_id=LOB
Ghir_A10G002860	bHLH	HLH	-	http://plntfdb.bio.uni-potsdam.de/v3.0/fam_mem.php?family_id=bHLH
Ghir_A11G033820	AP2-EREBP	AP2	-	http://plntfdb.bio.uni-potsdam.de/v3.0/fam_mem.php?family_id=AP2-EREBP
Ghir_A06G002510	GRF	QLQ,WRC	-	http://plntfdb.bio.uni-potsdam.de/v3.0/fam_mem.php?family_id=GRF
Ghir_A05G020880	HSF	HSF_DNA-bind	-	http://plntfdb.bio.uni-potsdam.de/v3.0/fam_mem.php?family_id=HSF
Ghir_D03G004750	WRKY	WRKY	-	http://plntfdb.bio.uni-potsdam.de/v3.0/fam_mem.php?family_id=WRKY
Ghir_D02G012940	zf-HD	ZF-HD_dimer	-	http://plntfdb.bio.uni-potsdam.de/v3.0/fam_mem.php?family_id=zf-HD
Ghir_D11G027210	WRKY	WRKY	-	http://plntfdb.bio.uni-potsdam.de/v3.0/fam_mem.php?family_id=WRKY
Ghir_D09G024860	RWP-RK	RWP-RK	-	http://plntfdb.bio.uni-potsdam.de/v3.0/fam_mem.php?family_id=RWP-RK
Ghir_D04G003860	RWP-RK	RWP-RK	-	http://plntfdb.bio.uni-potsdam.de/v3.0/fam_mem.php?family_id=RWP-RK
Ghir_D09G004070	WRKY	WRKY	-	http://plntfdb.bio.uni-potsdam.de/v3.0/fam_mem.php?family_id=WRKY
Ghir_D02G011380	RWP-RK	RWP-RK	-	http://plntfdb.bio.uni-potsdam.de/v3.0/fam_mem.php?family_id=RWP-RK
Ghir_A07G013010	Alfin-like	Alfin-like	DDT,Homeobox,JmjC,JmjN	http://plntfdb.bio.uni-potsdam.de/v3.0/fam_mem.php?family_id=Alfin-like
Ghir_A05G038050	MYB	Myb_DNA-binding	ARID,Response_reg,SNF2_N	http://plntfdb.bio.uni-potsdam.de/v3.0/fam_mem.php?family_id=MYB
Ghir_A09G019140	AP2-EREBP	AP2	-	http://plntfdb.bio.uni-potsdam.de/v3.0/fam_mem.php?family_id=AP2-EREBP
Ghir_D06G009110	MYB	Myb_DNA-binding	ARID,Response_reg,SNF2_N	http://plntfdb.bio.uni-potsdam.de/v3.0/fam_mem.php?family_id=MYB
Ghir_D11G007220	NAC	NAM	-	http://plntfdb.bio.uni-potsdam.de/v3.0/fam_mem.php?family_id=NAC
Ghir_A09G024980.2	ARR-B	G2-like,Myb_DNA-binding,Response_reg	CCT	http://plntfdb.bio.uni-potsdam.de/v3.0/fam_mem.php?family_id=ARR-B
Ghir_D12G006680	GRAS	GRAS	-	http://plntfdb.bio.uni-potsdam.de/v3.0/fam_mem.php?family_id=GRAS
Ghir_D06G003020.1	C2C2-GATA	GATA	-	http://plntfdb.bio.uni-potsdam.de/v3.0/fam_mem.php?family_id=C2C2-GATA
BGI_novel_G005416	G2-like	G2-like	Response_reg	http://plntfdb.bio.uni-potsdam.de/v3.0/fam_mem.php?family_id=G2-like
Ghir_D12G004330	ABI3VP1	B3	AP2,Auxin_resp	http://plntfdb.bio.uni-potsdam.de/v3.0/fam_mem.php?family_id=ABI3VP1
Ghir_A07G010720	GRAS	GRAS	-	http://plntfdb.bio.uni-potsdam.de/v3.0/fam_mem.php?family_id=GRAS
Ghir_D08G021720	MYB	Myb_DNA-binding	ARID,Response_reg,SNF2_N	http://plntfdb.bio.uni-potsdam.de/v3.0/fam_mem.php?family_id=MYB
Ghir_A04G005020	NAC	NAM	-	http://plntfdb.bio.uni-potsdam.de/v3.0/fam_mem.php?family_id=NAC
Ghir_D02G001330	GRAS	GRAS	-	http://plntfdb.bio.uni-potsdam.de/v3.0/fam_mem.php?family_id=GRAS
Ghir_D09G011420	HSF	HSF_DNA-bind	-	http://plntfdb.bio.uni-potsdam.de/v3.0/fam_mem.php?family_id=HSF
Ghir_A05G021670.1	BSD	BSD	-	http://plntfdb.bio.uni-potsdam.de/v3.0/fam_mem.php?family_id=BSD
Ghir_D01G018350.1	RWP-RK	RWP-RK	-	http://plntfdb.bio.uni-potsdam.de/v3.0/fam_mem.php?family_id=RWP-RK
Ghir_A05G015050.5	ARF	Auxin_resp	-	http://plntfdb.bio.uni-potsdam.de/v3.0/fam_mem.php?family_id=ARF
Ghir_A07G002460	C3H	zf-CCCH	PHD,SNF2_N,zf-C2H2	http://plntfdb.bio.uni-potsdam.de/v3.0/fam_mem.php?family_id=C3H
Ghir_D02G012350.1	FAR1	FAR1	-	http://plntfdb.bio.uni-potsdam.de/v3.0/fam_mem.php?family_id=FAR1
Ghir_D07G018380	C3H	zf-CCCH	PHD,SNF2_N,zf-C2H2	http://plntfdb.bio.uni-potsdam.de/v3.0/fam_mem.php?family_id=C3H
Ghir_A02G010200	ABI3VP1	B3	AP2,Auxin_resp	http://plntfdb.bio.uni-potsdam.de/v3.0/fam_mem.php?family_id=ABI3VP1
Ghir_A10G024140	C3H	zf-CCCH	PHD,SNF2_N,zf-C2H2	http://plntfdb.bio.uni-potsdam.de/v3.0/fam_mem.php?family_id=C3H
Ghir_D08G020710	LOB	DUF260	-	http://plntfdb.bio.uni-potsdam.de/v3.0/fam_mem.php?family_id=LOB
Ghir_A11G014590	BSD	BSD	-	http://plntfdb.bio.uni-potsdam.de/v3.0/fam_mem.php?family_id=BSD
Ghir_A07G014430	C2C2-Dof	zf-Dof	-	http://plntfdb.bio.uni-potsdam.de/v3.0/fam_mem.php?family_id=C2C2-Dof
Ghir_A10G008660	AP2-EREBP	AP2	-	http://plntfdb.bio.uni-potsdam.de/v3.0/fam_mem.php?family_id=AP2-EREBP
Ghir_D05G011250	WRKY	WRKY	-	http://plntfdb.bio.uni-potsdam.de/v3.0/fam_mem.php?family_id=WRKY
Ghir_D08G007000	C2H2	zf-C2H2	PHD	http://plntfdb.bio.uni-potsdam.de/v3.0/fam_mem.php?family_id=C2H2
Ghir_A04G008290	C2H2	zf-C2H2	PHD	http://plntfdb.bio.uni-potsdam.de/v3.0/fam_mem.php?family_id=C2H2
Ghir_A11G012040	ARR-B	G2-like,Myb_DNA-binding,Response_reg	CCT	http://plntfdb.bio.uni-potsdam.de/v3.0/fam_mem.php?family_id=ARR-B
Ghir_A03G020130	C2H2	zf-C2H2	PHD	http://plntfdb.bio.uni-potsdam.de/v3.0/fam_mem.php?family_id=C2H2
Ghir_A11G004930	MYB	Myb_DNA-binding	ARID,Response_reg,SNF2_N	http://plntfdb.bio.uni-potsdam.de/v3.0/fam_mem.php?family_id=MYB
BGI_novel_G002953	mTERF	mTERF	-	http://plntfdb.bio.uni-potsdam.de/v3.0/fam_mem.php?family_id=mTERF
Ghir_A05G038120	WRKY	WRKY	-	http://plntfdb.bio.uni-potsdam.de/v3.0/fam_mem.php?family_id=WRKY
Ghir_D03G018820	bZIP	bZIP_1,bZIP_2,bZIP_Maf	HLH	http://plntfdb.bio.uni-potsdam.de/v3.0/fam_mem.php?family_id=bZIP
Ghir_D13G023550	MYB	Myb_DNA-binding	ARID,Response_reg,SNF2_N	http://plntfdb.bio.uni-potsdam.de/v3.0/fam_mem.php?family_id=MYB
Ghir_A10G020000	GeBP	DUF573	-	http://plntfdb.bio.uni-potsdam.de/v3.0/fam_mem.php?family_id=GeBP
Ghir_A03G013050	BES1	DUF822	-	http://plntfdb.bio.uni-potsdam.de/v3.0/fam_mem.php?family_id=BES1
Ghir_D09G011530	C3H	zf-CCCH	PHD,SNF2_N,zf-C2H2	http://plntfdb.bio.uni-potsdam.de/v3.0/fam_mem.php?family_id=C3H
Ghir_D06G021450	C2C2-GATA	GATA	-	http://plntfdb.bio.uni-potsdam.de/v3.0/fam_mem.php?family_id=C2C2-GATA
Ghir_D10G024250	C2C2-Dof	zf-Dof	-	http://plntfdb.bio.uni-potsdam.de/v3.0/fam_mem.php?family_id=C2C2-Dof
Ghir_A06G015120	LOB	DUF260	-	http://plntfdb.bio.uni-potsdam.de/v3.0/fam_mem.php?family_id=LOB
Ghir_D08G009050	AP2-EREBP	AP2	-	http://plntfdb.bio.uni-potsdam.de/v3.0/fam_mem.php?family_id=AP2-EREBP
Ghir_D11G015710	C2C2-CO-like	CCT,zf-B_box	GATA,PLATZ	http://plntfdb.bio.uni-potsdam.de/v3.0/fam_mem.php?family_id=C2C2-CO-like
Ghir_A07G014280	bHLH	HLH	-	http://plntfdb.bio.uni-potsdam.de/v3.0/fam_mem.php?family_id=bHLH
Ghir_D06G004300	C2C2-Dof	zf-Dof	-	http://plntfdb.bio.uni-potsdam.de/v3.0/fam_mem.php?family_id=C2C2-Dof
Ghir_A12G014820	ULT	ULT	-	http://plntfdb.bio.uni-potsdam.de/v3.0/fam_mem.php?family_id=ULT
Ghir_A05G019690	TUB	Tub	-	http://plntfdb.bio.uni-potsdam.de/v3.0/fam_mem.php?family_id=TUB
Ghir_A12G026500	AP2-EREBP	AP2	-	http://plntfdb.bio.uni-potsdam.de/v3.0/fam_mem.php?family_id=AP2-EREBP
Ghir_A08G014470.1	C2H2	zf-C2H2	PHD	http://plntfdb.bio.uni-potsdam.de/v3.0/fam_mem.php?family_id=C2H2
Ghir_D02G014230	C2H2	zf-C2H2	PHD	http://plntfdb.bio.uni-potsdam.de/v3.0/fam_mem.php?family_id=C2H2
Ghir_A01G002160	Tify	tify	GATA	http://plntfdb.bio.uni-potsdam.de/v3.0/fam_mem.php?family_id=Tify
Ghir_D13G008980.2	BSD	BSD	-	http://plntfdb.bio.uni-potsdam.de/v3.0/fam_mem.php?family_id=BSD
Ghir_D06G001690	HSF	HSF_DNA-bind	-	http://plntfdb.bio.uni-potsdam.de/v3.0/fam_mem.php?family_id=HSF
Ghir_A02G018210	C2C2-GATA	GATA	-	http://plntfdb.bio.uni-potsdam.de/v3.0/fam_mem.php?family_id=C2C2-GATA
Ghir_D06G009840.3	Sigma70-like	Sigma70_r2,Sigma70_r3,Sigma70_r4	-	http://plntfdb.bio.uni-potsdam.de/v3.0/fam_mem.php?family_id=Sigma70-like
Ghir_A13G017970	AP2-EREBP	AP2	-	http://plntfdb.bio.uni-potsdam.de/v3.0/fam_mem.php?family_id=AP2-EREBP
Ghir_D07G006740	MYB	Myb_DNA-binding	ARID,Response_reg,SNF2_N	http://plntfdb.bio.uni-potsdam.de/v3.0/fam_mem.php?family_id=MYB
Ghir_D06G005320	DBP	DNC,PP2C	-	http://plntfdb.bio.uni-potsdam.de/v3.0/fam_mem.php?family_id=DBP
Ghir_D05G020910.1	NAC	NAM	-	http://plntfdb.bio.uni-potsdam.de/v3.0/fam_mem.php?family_id=NAC
Ghir_D11G036360	MYB	Myb_DNA-binding	ARID,Response_reg,SNF2_N	http://plntfdb.bio.uni-potsdam.de/v3.0/fam_mem.php?family_id=MYB
Ghir_A05G015940	G2-like	G2-like	Response_reg	http://plntfdb.bio.uni-potsdam.de/v3.0/fam_mem.php?family_id=G2-like
Ghir_A07G021000	G2-like	G2-like	Response_reg	http://plntfdb.bio.uni-potsdam.de/v3.0/fam_mem.php?family_id=G2-like
Ghir_A05G037630.1	WRKY	WRKY	-	http://plntfdb.bio.uni-potsdam.de/v3.0/fam_mem.php?family_id=WRKY
Ghir_D05G008980	C3H	zf-CCCH	PHD,SNF2_N,zf-C2H2	http://plntfdb.bio.uni-potsdam.de/v3.0/fam_mem.php?family_id=C3H
Ghir_A05G020960	bHLH	HLH	-	http://plntfdb.bio.uni-potsdam.de/v3.0/fam_mem.php?family_id=bHLH
Ghir_A12G018140	TCP	TCP	-	http://plntfdb.bio.uni-potsdam.de/v3.0/fam_mem.php?family_id=TCP
Ghir_A02G011750.1	CPP	TCR	-	http://plntfdb.bio.uni-potsdam.de/v3.0/fam_mem.php?family_id=CPP
Ghir_D12G019810	WRKY	WRKY	-	http://plntfdb.bio.uni-potsdam.de/v3.0/fam_mem.php?family_id=WRKY
Ghir_A01G010050.2	BBR/BPC	GAGA_bind	-	http://plntfdb.bio.uni-potsdam.de/v3.0/fam_mem.php?family_id=BBR/BPC
Ghir_A03G017830	MYB	Myb_DNA-binding	ARID,Response_reg,SNF2_N	http://plntfdb.bio.uni-potsdam.de/v3.0/fam_mem.php?family_id=MYB
Ghir_A01G012300	C3H	zf-CCCH	PHD,SNF2_N,zf-C2H2	http://plntfdb.bio.uni-potsdam.de/v3.0/fam_mem.php?family_id=C3H
Ghir_D06G020520	bZIP	bZIP_1,bZIP_2,bZIP_Maf	HLH	http://plntfdb.bio.uni-potsdam.de/v3.0/fam_mem.php?family_id=bZIP
Ghir_A03G012890	SBP	SBP	-	http://plntfdb.bio.uni-potsdam.de/v3.0/fam_mem.php?family_id=SBP
Ghir_A09G024070	AP2-EREBP	AP2	-	http://plntfdb.bio.uni-potsdam.de/v3.0/fam_mem.php?family_id=AP2-EREBP
Ghir_A12G026130	C2C2-Dof	zf-Dof	-	http://plntfdb.bio.uni-potsdam.de/v3.0/fam_mem.php?family_id=C2C2-Dof
Ghir_A11G009380	LIM	LIM	-	http://plntfdb.bio.uni-potsdam.de/v3.0/fam_mem.php?family_id=LIM
Ghir_D02G001240.1	NAC	NAM	-	http://plntfdb.bio.uni-potsdam.de/v3.0/fam_mem.php?family_id=NAC
Ghir_A13G000080	LOB	DUF260	-	http://plntfdb.bio.uni-potsdam.de/v3.0/fam_mem.php?family_id=LOB
Ghir_D08G012010	MYB	Myb_DNA-binding	ARID,Response_reg,SNF2_N	http://plntfdb.bio.uni-potsdam.de/v3.0/fam_mem.php?family_id=MYB
Ghir_A11G005410	GRAS	GRAS	-	http://plntfdb.bio.uni-potsdam.de/v3.0/fam_mem.php?family_id=GRAS
Ghir_A02G006320	GRAS	GRAS	-	http://plntfdb.bio.uni-potsdam.de/v3.0/fam_mem.php?family_id=GRAS
Ghir_D08G024990	PBF-2-like	Whirly	-	http://plntfdb.bio.uni-potsdam.de/v3.0/fam_mem.php?family_id=PBF-2-like
Ghir_D12G006610.2	TUB	Tub	-	http://plntfdb.bio.uni-potsdam.de/v3.0/fam_mem.php?family_id=TUB
Ghir_D09G014000	ABI3VP1	B3	AP2,Auxin_resp	http://plntfdb.bio.uni-potsdam.de/v3.0/fam_mem.php?family_id=ABI3VP1
Ghir_D13G019130	AP2-EREBP	AP2	-	http://plntfdb.bio.uni-potsdam.de/v3.0/fam_mem.php?family_id=AP2-EREBP
Ghir_A10G006920	WRKY	WRKY	-	http://plntfdb.bio.uni-potsdam.de/v3.0/fam_mem.php?family_id=WRKY
Ghir_D07G023780	C2H2	zf-C2H2	PHD	http://plntfdb.bio.uni-potsdam.de/v3.0/fam_mem.php?family_id=C2H2
Ghir_A11G023430	MYB	Myb_DNA-binding	ARID,Response_reg,SNF2_N	http://plntfdb.bio.uni-potsdam.de/v3.0/fam_mem.php?family_id=MYB
Ghir_D06G000950	NAC	NAM	-	http://plntfdb.bio.uni-potsdam.de/v3.0/fam_mem.php?family_id=NAC
Ghir_A11G026660	G2-like	G2-like	Response_reg	http://plntfdb.bio.uni-potsdam.de/v3.0/fam_mem.php?family_id=G2-like
Ghir_D10G003340	ARF	Auxin_resp	-	http://plntfdb.bio.uni-potsdam.de/v3.0/fam_mem.php?family_id=ARF
Ghir_A11G015440.1	MYB	Myb_DNA-binding	ARID,Response_reg,SNF2_N	http://plntfdb.bio.uni-potsdam.de/v3.0/fam_mem.php?family_id=MYB
Ghir_D11G026250	NAC	NAM	-	http://plntfdb.bio.uni-potsdam.de/v3.0/fam_mem.php?family_id=NAC
Ghir_D05G003200	C2C2-GATA	GATA	-	http://plntfdb.bio.uni-potsdam.de/v3.0/fam_mem.php?family_id=C2C2-GATA
BGI_novel_G003485	MYB	Myb_DNA-binding	ARID,Response_reg,SNF2_N	http://plntfdb.bio.uni-potsdam.de/v3.0/fam_mem.php?family_id=MYB
Ghir_A03G016600	C3H	zf-CCCH	PHD,SNF2_N,zf-C2H2	http://plntfdb.bio.uni-potsdam.de/v3.0/fam_mem.php?family_id=C3H
Ghir_D03G013560	GRAS	GRAS	-	http://plntfdb.bio.uni-potsdam.de/v3.0/fam_mem.php?family_id=GRAS
Ghir_A01G010670	ABI3VP1	B3	AP2,Auxin_resp	http://plntfdb.bio.uni-potsdam.de/v3.0/fam_mem.php?family_id=ABI3VP1
Ghir_D11G011550	MYB	Myb_DNA-binding	ARID,Response_reg,SNF2_N	http://plntfdb.bio.uni-potsdam.de/v3.0/fam_mem.php?family_id=MYB
Ghir_A06G014270	WRKY	WRKY	-	http://plntfdb.bio.uni-potsdam.de/v3.0/fam_mem.php?family_id=WRKY
Ghir_D11G004410	AP2-EREBP	AP2	-	http://plntfdb.bio.uni-potsdam.de/v3.0/fam_mem.php?family_id=AP2-EREBP
Ghir_D10G023030	AP2-EREBP	AP2	-	http://plntfdb.bio.uni-potsdam.de/v3.0/fam_mem.php?family_id=AP2-EREBP
Ghir_A02G016280	bHLH	HLH	-	http://plntfdb.bio.uni-potsdam.de/v3.0/fam_mem.php?family_id=bHLH
Ghir_D09G000720	WRKY	WRKY	-	http://plntfdb.bio.uni-potsdam.de/v3.0/fam_mem.php?family_id=WRKY
Ghir_A09G017630	AP2-EREBP	AP2	-	http://plntfdb.bio.uni-potsdam.de/v3.0/fam_mem.php?family_id=AP2-EREBP
Ghir_A05G008870	C2H2	zf-C2H2	PHD	http://plntfdb.bio.uni-potsdam.de/v3.0/fam_mem.php?family_id=C2H2
Ghir_D06G015050.1	WRKY	WRKY	-	http://plntfdb.bio.uni-potsdam.de/v3.0/fam_mem.php?family_id=WRKY
Ghir_D05G001490	PLATZ	PLATZ	-	http://plntfdb.bio.uni-potsdam.de/v3.0/fam_mem.php?family_id=PLATZ
Ghir_A10G006410	C2C2-GATA	GATA	-	http://plntfdb.bio.uni-potsdam.de/v3.0/fam_mem.php?family_id=C2C2-GATA
Ghir_D07G008570	MYB	Myb_DNA-binding	ARID,Response_reg,SNF2_N	http://plntfdb.bio.uni-potsdam.de/v3.0/fam_mem.php?family_id=MYB
Ghir_A07G011940	OFP	Ovate	-	http://plntfdb.bio.uni-potsdam.de/v3.0/fam_mem.php?family_id=OFP
Ghir_A01G013560	zf-HD	ZF-HD_dimer	-	http://plntfdb.bio.uni-potsdam.de/v3.0/fam_mem.php?family_id=zf-HD
Ghir_D09G010230.1	NAC	NAM	-	http://plntfdb.bio.uni-potsdam.de/v3.0/fam_mem.php?family_id=NAC
Ghir_D02G004930	ABI3VP1	B3	AP2,Auxin_resp	http://plntfdb.bio.uni-potsdam.de/v3.0/fam_mem.php?family_id=ABI3VP1
Ghir_D13G008780	SBP	SBP	-	http://plntfdb.bio.uni-potsdam.de/v3.0/fam_mem.php?family_id=SBP
Ghir_D13G002530.2	MYB	Myb_DNA-binding	ARID,Response_reg,SNF2_N	http://plntfdb.bio.uni-potsdam.de/v3.0/fam_mem.php?family_id=MYB
Ghir_A03G019190	CAMTA	CG-1,IQ	-	http://plntfdb.bio.uni-potsdam.de/v3.0/fam_mem.php?family_id=CAMTA
Ghir_A09G015540.1	E2F-DP	E2F_TDP	-	http://plntfdb.bio.uni-potsdam.de/v3.0/fam_mem.php?family_id=E2F-DP
Ghir_A05G003450	GRF	QLQ,WRC	-	http://plntfdb.bio.uni-potsdam.de/v3.0/fam_mem.php?family_id=GRF
Ghir_A10G022510.3	GRAS	GRAS	-	http://plntfdb.bio.uni-potsdam.de/v3.0/fam_mem.php?family_id=GRAS
Ghir_A02G003130	FHA	FHA	-	http://plntfdb.bio.uni-potsdam.de/v3.0/fam_mem.php?family_id=FHA
Ghir_A11G019630	C2H2	zf-C2H2	PHD	http://plntfdb.bio.uni-potsdam.de/v3.0/fam_mem.php?family_id=C2H2
Ghir_A11G010830	NAC	NAM	-	http://plntfdb.bio.uni-potsdam.de/v3.0/fam_mem.php?family_id=NAC
Ghir_A01G009160.1	RWP-RK	RWP-RK	-	http://plntfdb.bio.uni-potsdam.de/v3.0/fam_mem.php?family_id=RWP-RK
Ghir_D05G003160.1	MYB	Myb_DNA-binding	ARID,Response_reg,SNF2_N	http://plntfdb.bio.uni-potsdam.de/v3.0/fam_mem.php?family_id=MYB
Ghir_D13G000570	LOB	DUF260	-	http://plntfdb.bio.uni-potsdam.de/v3.0/fam_mem.php?family_id=LOB
Ghir_A11G013630	bHLH	HLH	-	http://plntfdb.bio.uni-potsdam.de/v3.0/fam_mem.php?family_id=bHLH
Ghir_D06G008500	Tify	tify	GATA	http://plntfdb.bio.uni-potsdam.de/v3.0/fam_mem.php?family_id=Tify
Ghir_A08G020570	FAR1	FAR1	-	http://plntfdb.bio.uni-potsdam.de/v3.0/fam_mem.php?family_id=FAR1
Ghir_D10G016010	HSF	HSF_DNA-bind	-	http://plntfdb.bio.uni-potsdam.de/v3.0/fam_mem.php?family_id=HSF
Ghir_A09G025720	RWP-RK	RWP-RK	-	http://plntfdb.bio.uni-potsdam.de/v3.0/fam_mem.php?family_id=RWP-RK
Ghir_A11G004920	TUB	Tub	-	http://plntfdb.bio.uni-potsdam.de/v3.0/fam_mem.php?family_id=TUB
Ghir_D10G007550	Trihelix	trihelix	-	http://plntfdb.bio.uni-potsdam.de/v3.0/fam_mem.php?family_id=Trihelix
Ghir_A04G008300	NAC	NAM	-	http://plntfdb.bio.uni-potsdam.de/v3.0/fam_mem.php?family_id=NAC
Ghir_D02G010480	AP2-EREBP	AP2	-	http://plntfdb.bio.uni-potsdam.de/v3.0/fam_mem.php?family_id=AP2-EREBP
Ghir_A06G019420	WRKY	WRKY	-	http://plntfdb.bio.uni-potsdam.de/v3.0/fam_mem.php?family_id=WRKY
Ghir_D05G032380	HB	Homeobox,KNOX1,KNOX2	-	http://plntfdb.bio.uni-potsdam.de/v3.0/fam_mem.php?family_id=HB
Ghir_A11G021000	WRKY	WRKY	-	http://plntfdb.bio.uni-potsdam.de/v3.0/fam_mem.php?family_id=WRKY
Ghir_A12G006640	C2C2-GATA	GATA	-	http://plntfdb.bio.uni-potsdam.de/v3.0/fam_mem.php?family_id=C2C2-GATA
Ghir_A11G016400	WRKY	WRKY	-	http://plntfdb.bio.uni-potsdam.de/v3.0/fam_mem.php?family_id=WRKY
Ghir_D09G012750	MYB	Myb_DNA-binding	ARID,Response_reg,SNF2_N	http://plntfdb.bio.uni-potsdam.de/v3.0/fam_mem.php?family_id=MYB
Ghir_D10G003310	NAC	NAM	-	http://plntfdb.bio.uni-potsdam.de/v3.0/fam_mem.php?family_id=NAC
Ghir_A05G039020	MADS	SRF-TF	-	http://plntfdb.bio.uni-potsdam.de/v3.0/fam_mem.php?family_id=MADS
Ghir_D09G003060	LOB	DUF260	-	http://plntfdb.bio.uni-potsdam.de/v3.0/fam_mem.php?family_id=LOB
Ghir_A02G007110	GRAS	GRAS	-	http://plntfdb.bio.uni-potsdam.de/v3.0/fam_mem.php?family_id=GRAS
Ghir_D09G023010	mTERF	mTERF	-	http://plntfdb.bio.uni-potsdam.de/v3.0/fam_mem.php?family_id=mTERF
Ghir_D03G007700.1	AP2-EREBP	AP2	-	http://plntfdb.bio.uni-potsdam.de/v3.0/fam_mem.php?family_id=AP2-EREBP
Ghir_D02G020530.1	TIG	TIG	-	http://plntfdb.bio.uni-potsdam.de/v3.0/fam_mem.php?family_id=TIG
Ghir_A12G014300	MYB	Myb_DNA-binding	ARID,Response_reg,SNF2_N	http://plntfdb.bio.uni-potsdam.de/v3.0/fam_mem.php?family_id=MYB
Ghir_D05G022650	bHLH	HLH	-	http://plntfdb.bio.uni-potsdam.de/v3.0/fam_mem.php?family_id=bHLH
Ghir_D11G009890	WRKY	WRKY	-	http://plntfdb.bio.uni-potsdam.de/v3.0/fam_mem.php?family_id=WRKY
Ghir_A08G005740	bHLH	HLH	-	http://plntfdb.bio.uni-potsdam.de/v3.0/fam_mem.php?family_id=bHLH
Ghir_A10G024380	bHLH	HLH	-	http://plntfdb.bio.uni-potsdam.de/v3.0/fam_mem.php?family_id=bHLH
Ghir_D02G012920	NAC	NAM	-	http://plntfdb.bio.uni-potsdam.de/v3.0/fam_mem.php?family_id=NAC
Ghir_A09G006930	TUB	Tub	-	http://plntfdb.bio.uni-potsdam.de/v3.0/fam_mem.php?family_id=TUB
Ghir_D11G006950	bHLH	HLH	-	http://plntfdb.bio.uni-potsdam.de/v3.0/fam_mem.php?family_id=bHLH
Ghir_D08G013600	MYB	Myb_DNA-binding	ARID,Response_reg,SNF2_N	http://plntfdb.bio.uni-potsdam.de/v3.0/fam_mem.php?family_id=MYB
Ghir_D12G027450	ARR-B	G2-like,Myb_DNA-binding,Response_reg	CCT	http://plntfdb.bio.uni-potsdam.de/v3.0/fam_mem.php?family_id=ARR-B
Ghir_D05G025120	NAC	NAM	-	http://plntfdb.bio.uni-potsdam.de/v3.0/fam_mem.php?family_id=NAC
Ghir_D02G018530	AP2-EREBP	AP2	-	http://plntfdb.bio.uni-potsdam.de/v3.0/fam_mem.php?family_id=AP2-EREBP
Ghir_D08G025300	MYB	Myb_DNA-binding	ARID,Response_reg,SNF2_N	http://plntfdb.bio.uni-potsdam.de/v3.0/fam_mem.php?family_id=MYB
Ghir_A07G011200	C3H	zf-CCCH	PHD,SNF2_N,zf-C2H2	http://plntfdb.bio.uni-potsdam.de/v3.0/fam_mem.php?family_id=C3H
Ghir_D09G016030	C2C2-Dof	zf-Dof	-	http://plntfdb.bio.uni-potsdam.de/v3.0/fam_mem.php?family_id=C2C2-Dof
Ghir_D08G019710	LIM	LIM	-	http://plntfdb.bio.uni-potsdam.de/v3.0/fam_mem.php?family_id=LIM
Ghir_A03G021030	ABI3VP1	B3	AP2,Auxin_resp	http://plntfdb.bio.uni-potsdam.de/v3.0/fam_mem.php?family_id=ABI3VP1
Ghir_D01G013310	C3H	zf-CCCH	PHD,SNF2_N,zf-C2H2	http://plntfdb.bio.uni-potsdam.de/v3.0/fam_mem.php?family_id=C3H
Ghir_A08G024300	MYB	Myb_DNA-binding	ARID,Response_reg,SNF2_N	http://plntfdb.bio.uni-potsdam.de/v3.0/fam_mem.php?family_id=MYB
Ghir_A05G013820	C2C2-Dof	zf-Dof	-	http://plntfdb.bio.uni-potsdam.de/v3.0/fam_mem.php?family_id=C2C2-Dof
Ghir_D12G024800.3	WRKY	WRKY	-	http://plntfdb.bio.uni-potsdam.de/v3.0/fam_mem.php?family_id=WRKY
Ghir_D06G010840	AP2-EREBP	AP2	-	http://plntfdb.bio.uni-potsdam.de/v3.0/fam_mem.php?family_id=AP2-EREBP
Ghir_D10G009940	GRAS	GRAS	-	http://plntfdb.bio.uni-potsdam.de/v3.0/fam_mem.php?family_id=GRAS
Ghir_A10G003000	MADS	SRF-TF	-	http://plntfdb.bio.uni-potsdam.de/v3.0/fam_mem.php?family_id=MADS
Ghir_D12G007490.1	ARF	Auxin_resp	-	http://plntfdb.bio.uni-potsdam.de/v3.0/fam_mem.php?family_id=ARF
Ghir_A12G027410	ARR-B	G2-like,Myb_DNA-binding,Response_reg	CCT	http://plntfdb.bio.uni-potsdam.de/v3.0/fam_mem.php?family_id=ARR-B
Ghir_D02G001260	RWP-RK	RWP-RK	-	http://plntfdb.bio.uni-potsdam.de/v3.0/fam_mem.php?family_id=RWP-RK
Ghir_A12G000820.3	C2C2-CO-like	CCT,zf-B_box	GATA,PLATZ	http://plntfdb.bio.uni-potsdam.de/v3.0/fam_mem.php?family_id=C2C2-CO-like
Ghir_D05G018000	GRAS	GRAS	-	http://plntfdb.bio.uni-potsdam.de/v3.0/fam_mem.php?family_id=GRAS
Ghir_A12G019560	WRKY	WRKY	-	http://plntfdb.bio.uni-potsdam.de/v3.0/fam_mem.php?family_id=WRKY
Ghir_D04G004760	C2H2	zf-C2H2	PHD	http://plntfdb.bio.uni-potsdam.de/v3.0/fam_mem.php?family_id=C2H2
Ghir_A09G021730	bHLH	HLH	-	http://plntfdb.bio.uni-potsdam.de/v3.0/fam_mem.php?family_id=bHLH
Ghir_D08G011760	ABI3VP1	B3	AP2,Auxin_resp	http://plntfdb.bio.uni-potsdam.de/v3.0/fam_mem.php?family_id=ABI3VP1
Ghir_D06G014590	AP2-EREBP	AP2	-	http://plntfdb.bio.uni-potsdam.de/v3.0/fam_mem.php?family_id=AP2-EREBP
Ghir_A12G023760	TCP	TCP	-	http://plntfdb.bio.uni-potsdam.de/v3.0/fam_mem.php?family_id=TCP
Ghir_A10G001350	bHLH	HLH	-	http://plntfdb.bio.uni-potsdam.de/v3.0/fam_mem.php?family_id=bHLH
Ghir_D11G029770	HB	Homeobox,KNOX1,KNOX2	-	http://plntfdb.bio.uni-potsdam.de/v3.0/fam_mem.php?family_id=HB
Ghir_A09G013640.1	MYB	Myb_DNA-binding	ARID,Response_reg,SNF2_N	http://plntfdb.bio.uni-potsdam.de/v3.0/fam_mem.php?family_id=MYB
Ghir_D11G001040	HSF	HSF_DNA-bind	-	http://plntfdb.bio.uni-potsdam.de/v3.0/fam_mem.php?family_id=HSF
Ghir_D03G018820.1	bZIP	bZIP_1,bZIP_2,bZIP_Maf	HLH	http://plntfdb.bio.uni-potsdam.de/v3.0/fam_mem.php?family_id=bZIP
Ghir_D07G005990	C3H	zf-CCCH	PHD,SNF2_N,zf-C2H2	http://plntfdb.bio.uni-potsdam.de/v3.0/fam_mem.php?family_id=C3H
Ghir_D10G001480	WRKY	WRKY	-	http://plntfdb.bio.uni-potsdam.de/v3.0/fam_mem.php?family_id=WRKY
Ghir_A05G004120	Alfin-like	Alfin-like	DDT,Homeobox,JmjC,JmjN	http://plntfdb.bio.uni-potsdam.de/v3.0/fam_mem.php?family_id=Alfin-like
Ghir_D12G008860	GRAS	GRAS	-	http://plntfdb.bio.uni-potsdam.de/v3.0/fam_mem.php?family_id=GRAS
Ghir_D08G024560	C3H	zf-CCCH	PHD,SNF2_N,zf-C2H2	http://plntfdb.bio.uni-potsdam.de/v3.0/fam_mem.php?family_id=C3H
Ghir_A13G008310	MYB	Myb_DNA-binding	ARID,Response_reg,SNF2_N	http://plntfdb.bio.uni-potsdam.de/v3.0/fam_mem.php?family_id=MYB
Ghir_A12G028770	MYB	Myb_DNA-binding	ARID,Response_reg,SNF2_N	http://plntfdb.bio.uni-potsdam.de/v3.0/fam_mem.php?family_id=MYB
Ghir_A11G023530	WRKY	WRKY	-	http://plntfdb.bio.uni-potsdam.de/v3.0/fam_mem.php?family_id=WRKY
Ghir_A10G006790	NAC	NAM	-	http://plntfdb.bio.uni-potsdam.de/v3.0/fam_mem.php?family_id=NAC
Ghir_A10G008210	WRKY	WRKY	-	http://plntfdb.bio.uni-potsdam.de/v3.0/fam_mem.php?family_id=WRKY
Ghir_A03G001240	MYB	Myb_DNA-binding	ARID,Response_reg,SNF2_N	http://plntfdb.bio.uni-potsdam.de/v3.0/fam_mem.php?family_id=MYB
Ghir_D06G014580	AP2-EREBP	AP2	-	http://plntfdb.bio.uni-potsdam.de/v3.0/fam_mem.php?family_id=AP2-EREBP
Ghir_D09G013060	G2-like	G2-like	Response_reg	http://plntfdb.bio.uni-potsdam.de/v3.0/fam_mem.php?family_id=G2-like
Ghir_D10G011080	WRKY	WRKY	-	http://plntfdb.bio.uni-potsdam.de/v3.0/fam_mem.php?family_id=WRKY
Ghir_D12G001760	MADS	SRF-TF	-	http://plntfdb.bio.uni-potsdam.de/v3.0/fam_mem.php?family_id=MADS
Ghir_A04G002230	GRAS	GRAS	-	http://plntfdb.bio.uni-potsdam.de/v3.0/fam_mem.php?family_id=GRAS
Ghir_A01G006120	NOZZLE	NOZZLE_Angio	-	http://plntfdb.bio.uni-potsdam.de/v3.0/fam_mem.php?family_id=NOZZLE
Ghir_A09G003250	NAC	NAM	-	http://plntfdb.bio.uni-potsdam.de/v3.0/fam_mem.php?family_id=NAC
Ghir_A05G003890.1	Tify	tify	GATA	http://plntfdb.bio.uni-potsdam.de/v3.0/fam_mem.php?family_id=Tify
Ghir_A05G026130.1	MADS	SRF-TF	-	http://plntfdb.bio.uni-potsdam.de/v3.0/fam_mem.php?family_id=MADS
Ghir_D08G013880	NAC	NAM	-	http://plntfdb.bio.uni-potsdam.de/v3.0/fam_mem.php?family_id=NAC
Ghir_A06G021640	AP2-EREBP	AP2	-	http://plntfdb.bio.uni-potsdam.de/v3.0/fam_mem.php?family_id=AP2-EREBP
Ghir_A01G019630	OFP	Ovate	-	http://plntfdb.bio.uni-potsdam.de/v3.0/fam_mem.php?family_id=OFP
Ghir_D12G006640	C2C2-GATA	GATA	-	http://plntfdb.bio.uni-potsdam.de/v3.0/fam_mem.php?family_id=C2C2-GATA
Ghir_D03G003760	MYB	Myb_DNA-binding	ARID,Response_reg,SNF2_N	http://plntfdb.bio.uni-potsdam.de/v3.0/fam_mem.php?family_id=MYB
Ghir_A08G002190	G2-like	G2-like	Response_reg	http://plntfdb.bio.uni-potsdam.de/v3.0/fam_mem.php?family_id=G2-like
Ghir_D05G029880	NAC	NAM	-	http://plntfdb.bio.uni-potsdam.de/v3.0/fam_mem.php?family_id=NAC
Ghir_D11G007810	FAR1	FAR1	-	http://plntfdb.bio.uni-potsdam.de/v3.0/fam_mem.php?family_id=FAR1
Ghir_D08G013310.1	AP2-EREBP	AP2	-	http://plntfdb.bio.uni-potsdam.de/v3.0/fam_mem.php?family_id=AP2-EREBP
Ghir_D05G020140	LIM	LIM	-	http://plntfdb.bio.uni-potsdam.de/v3.0/fam_mem.php?family_id=LIM
Ghir_D09G023740	FAR1	FAR1	-	http://plntfdb.bio.uni-potsdam.de/v3.0/fam_mem.php?family_id=FAR1
Ghir_A10G019020.1	SRS	DUF702	-	http://plntfdb.bio.uni-potsdam.de/v3.0/fam_mem.php?family_id=SRS
Ghir_A08G024070	PBF-2-like	Whirly	-	http://plntfdb.bio.uni-potsdam.de/v3.0/fam_mem.php?family_id=PBF-2-like
Ghir_A05G030300.1	C2H2	zf-C2H2	PHD	http://plntfdb.bio.uni-potsdam.de/v3.0/fam_mem.php?family_id=C2H2
Ghir_D13G025730	NAC	NAM	-	http://plntfdb.bio.uni-potsdam.de/v3.0/fam_mem.php?family_id=NAC
Ghir_D13G013960	C3H	zf-CCCH	PHD,SNF2_N,zf-C2H2	http://plntfdb.bio.uni-potsdam.de/v3.0/fam_mem.php?family_id=C3H
Ghir_A02G008040	MADS	SRF-TF	-	http://plntfdb.bio.uni-potsdam.de/v3.0/fam_mem.php?family_id=MADS
Ghir_A07G007280	bHLH	HLH	-	http://plntfdb.bio.uni-potsdam.de/v3.0/fam_mem.php?family_id=bHLH
Ghir_D09G010790	FAR1	FAR1	-	http://plntfdb.bio.uni-potsdam.de/v3.0/fam_mem.php?family_id=FAR1
Ghir_A03G011130	MYB	Myb_DNA-binding	ARID,Response_reg,SNF2_N	http://plntfdb.bio.uni-potsdam.de/v3.0/fam_mem.php?family_id=MYB
Ghir_D03G002490.1	AP2-EREBP	AP2	-	http://plntfdb.bio.uni-potsdam.de/v3.0/fam_mem.php?family_id=AP2-EREBP
Ghir_A06G000920	MYB	Myb_DNA-binding	ARID,Response_reg,SNF2_N	http://plntfdb.bio.uni-potsdam.de/v3.0/fam_mem.php?family_id=MYB
Ghir_A09G012160	NAC	NAM	-	http://plntfdb.bio.uni-potsdam.de/v3.0/fam_mem.php?family_id=NAC
Ghir_A11G004400	ARF	Auxin_resp	-	http://plntfdb.bio.uni-potsdam.de/v3.0/fam_mem.php?family_id=ARF
Ghir_A12G023730	MADS	SRF-TF	-	http://plntfdb.bio.uni-potsdam.de/v3.0/fam_mem.php?family_id=MADS
Ghir_D12G013520	WRKY	WRKY	-	http://plntfdb.bio.uni-potsdam.de/v3.0/fam_mem.php?family_id=WRKY
Ghir_A08G024660	TUB	Tub	-	http://plntfdb.bio.uni-potsdam.de/v3.0/fam_mem.php?family_id=TUB
Ghir_A01G012730.1	SBP	SBP	-	http://plntfdb.bio.uni-potsdam.de/v3.0/fam_mem.php?family_id=SBP
Ghir_D11G010070.1	bZIP	bZIP_1,bZIP_2,bZIP_Maf	HLH	http://plntfdb.bio.uni-potsdam.de/v3.0/fam_mem.php?family_id=bZIP
Ghir_A12G005270	ARR-B	G2-like,Myb_DNA-binding,Response_reg	CCT	http://plntfdb.bio.uni-potsdam.de/v3.0/fam_mem.php?family_id=ARR-B
Ghir_A08G026610	MYB	Myb_DNA-binding	ARID,Response_reg,SNF2_N	http://plntfdb.bio.uni-potsdam.de/v3.0/fam_mem.php?family_id=MYB
Ghir_D13G007650.1	TCP	TCP	-	http://plntfdb.bio.uni-potsdam.de/v3.0/fam_mem.php?family_id=TCP
Ghir_A11G027480	Trihelix	trihelix	-	http://plntfdb.bio.uni-potsdam.de/v3.0/fam_mem.php?family_id=Trihelix
Ghir_A13G002110	AP2-EREBP	AP2	-	http://plntfdb.bio.uni-potsdam.de/v3.0/fam_mem.php?family_id=AP2-EREBP
Ghir_D11G018000	NAC	NAM	-	http://plntfdb.bio.uni-potsdam.de/v3.0/fam_mem.php?family_id=NAC
Ghir_D10G023920	C2H2	zf-C2H2	PHD	http://plntfdb.bio.uni-potsdam.de/v3.0/fam_mem.php?family_id=C2H2
Ghir_A03G011480	G2-like	G2-like	Response_reg	http://plntfdb.bio.uni-potsdam.de/v3.0/fam_mem.php?family_id=G2-like
Ghir_D10G003210	AP2-EREBP	AP2	-	http://plntfdb.bio.uni-potsdam.de/v3.0/fam_mem.php?family_id=AP2-EREBP
Ghir_A09G024060	AP2-EREBP	AP2	-	http://plntfdb.bio.uni-potsdam.de/v3.0/fam_mem.php?family_id=AP2-EREBP
Ghir_A08G016190	bZIP	bZIP_1,bZIP_2,bZIP_Maf	HLH	http://plntfdb.bio.uni-potsdam.de/v3.0/fam_mem.php?family_id=bZIP
Ghir_D10G021350	FAR1	FAR1	-	http://plntfdb.bio.uni-potsdam.de/v3.0/fam_mem.php?family_id=FAR1
Ghir_D05G018180	MYB	Myb_DNA-binding	ARID,Response_reg,SNF2_N	http://plntfdb.bio.uni-potsdam.de/v3.0/fam_mem.php?family_id=MYB
Ghir_D04G018640	MADS	SRF-TF	-	http://plntfdb.bio.uni-potsdam.de/v3.0/fam_mem.php?family_id=MADS
Ghir_A03G000600	bHLH	HLH	-	http://plntfdb.bio.uni-potsdam.de/v3.0/fam_mem.php?family_id=bHLH
Ghir_D02G013230.2	MYB	Myb_DNA-binding	ARID,Response_reg,SNF2_N	http://plntfdb.bio.uni-potsdam.de/v3.0/fam_mem.php?family_id=MYB
Ghir_A01G013280	FAR1	FAR1	-	http://plntfdb.bio.uni-potsdam.de/v3.0/fam_mem.php?family_id=FAR1
Ghir_A04G005060	MADS	SRF-TF	-	http://plntfdb.bio.uni-potsdam.de/v3.0/fam_mem.php?family_id=MADS
Ghir_A02G004670	SBP	SBP	-	http://plntfdb.bio.uni-potsdam.de/v3.0/fam_mem.php?family_id=SBP
Ghir_D04G007140	MYB	Myb_DNA-binding	ARID,Response_reg,SNF2_N	http://plntfdb.bio.uni-potsdam.de/v3.0/fam_mem.php?family_id=MYB
Ghir_D13G011660	GeBP	DUF573	-	http://plntfdb.bio.uni-potsdam.de/v3.0/fam_mem.php?family_id=GeBP
Ghir_D13G005490.1	TIG	TIG	-	http://plntfdb.bio.uni-potsdam.de/v3.0/fam_mem.php?family_id=TIG
BGI_novel_G003521	MYB	Myb_DNA-binding	ARID,Response_reg,SNF2_N	http://plntfdb.bio.uni-potsdam.de/v3.0/fam_mem.php?family_id=MYB
Ghir_D06G012700	mTERF	mTERF	-	http://plntfdb.bio.uni-potsdam.de/v3.0/fam_mem.php?family_id=mTERF
Ghir_A09G018020	C2C2-Dof	zf-Dof	-	http://plntfdb.bio.uni-potsdam.de/v3.0/fam_mem.php?family_id=C2C2-Dof
Ghir_D05G012130	AP2-EREBP	AP2	-	http://plntfdb.bio.uni-potsdam.de/v3.0/fam_mem.php?family_id=AP2-EREBP
Ghir_A12G015050	G2-like	G2-like	Response_reg	http://plntfdb.bio.uni-potsdam.de/v3.0/fam_mem.php?family_id=G2-like
Ghir_D02G002330	HSF	HSF_DNA-bind	-	http://plntfdb.bio.uni-potsdam.de/v3.0/fam_mem.php?family_id=HSF
Ghir_D06G022720	AP2-EREBP	AP2	-	http://plntfdb.bio.uni-potsdam.de/v3.0/fam_mem.php?family_id=AP2-EREBP
Ghir_D10G013210	RWP-RK	RWP-RK	-	http://plntfdb.bio.uni-potsdam.de/v3.0/fam_mem.php?family_id=RWP-RK
Ghir_D08G003110	WRKY	WRKY	-	http://plntfdb.bio.uni-potsdam.de/v3.0/fam_mem.php?family_id=WRKY
Ghir_D07G014470	NAC	NAM	-	http://plntfdb.bio.uni-potsdam.de/v3.0/fam_mem.php?family_id=NAC
Ghir_D11G036770	G2-like	G2-like	Response_reg	http://plntfdb.bio.uni-potsdam.de/v3.0/fam_mem.php?family_id=G2-like
Ghir_A12G012660.3	MYB	Myb_DNA-binding	ARID,Response_reg,SNF2_N	http://plntfdb.bio.uni-potsdam.de/v3.0/fam_mem.php?family_id=MYB
Ghir_A07G022490	bHLH	HLH	-	http://plntfdb.bio.uni-potsdam.de/v3.0/fam_mem.php?family_id=bHLH
Ghir_D05G017170	bHLH	HLH	-	http://plntfdb.bio.uni-potsdam.de/v3.0/fam_mem.php?family_id=bHLH
Ghir_A08G014440	GRAS	GRAS	-	http://plntfdb.bio.uni-potsdam.de/v3.0/fam_mem.php?family_id=GRAS
Ghir_D11G001410	WRKY	WRKY	-	http://plntfdb.bio.uni-potsdam.de/v3.0/fam_mem.php?family_id=WRKY
Ghir_D13G001640	LOB	DUF260	-	http://plntfdb.bio.uni-potsdam.de/v3.0/fam_mem.php?family_id=LOB
Ghir_A13G006580	C3H	zf-CCCH	PHD,SNF2_N,zf-C2H2	http://plntfdb.bio.uni-potsdam.de/v3.0/fam_mem.php?family_id=C3H
Ghir_D05G017710	Alfin-like	Alfin-like	DDT,Homeobox,JmjC,JmjN	http://plntfdb.bio.uni-potsdam.de/v3.0/fam_mem.php?family_id=Alfin-like
Ghir_D12G017670	MYB	Myb_DNA-binding	ARID,Response_reg,SNF2_N	http://plntfdb.bio.uni-potsdam.de/v3.0/fam_mem.php?family_id=MYB
Ghir_A09G011570	MYB	Myb_DNA-binding	ARID,Response_reg,SNF2_N	http://plntfdb.bio.uni-potsdam.de/v3.0/fam_mem.php?family_id=MYB
Ghir_D02G013230	MYB	Myb_DNA-binding	ARID,Response_reg,SNF2_N	http://plntfdb.bio.uni-potsdam.de/v3.0/fam_mem.php?family_id=MYB
Ghir_D09G005740	C2C2-GATA	GATA	-	http://plntfdb.bio.uni-potsdam.de/v3.0/fam_mem.php?family_id=C2C2-GATA
Ghir_A11G001400	WRKY	WRKY	-	http://plntfdb.bio.uni-potsdam.de/v3.0/fam_mem.php?family_id=WRKY
Ghir_A02G006270	mTERF	mTERF	-	http://plntfdb.bio.uni-potsdam.de/v3.0/fam_mem.php?family_id=mTERF
Ghir_A12G029270	AP2-EREBP	AP2	-	http://plntfdb.bio.uni-potsdam.de/v3.0/fam_mem.php?family_id=AP2-EREBP
Ghir_D08G021610.1	C2C2-GATA	GATA	-	http://plntfdb.bio.uni-potsdam.de/v3.0/fam_mem.php?family_id=C2C2-GATA
Ghir_A11G010920.1	bHLH	HLH	-	http://plntfdb.bio.uni-potsdam.de/v3.0/fam_mem.php?family_id=bHLH
Ghir_D11G004830.5	MYB	Myb_DNA-binding	ARID,Response_reg,SNF2_N	http://plntfdb.bio.uni-potsdam.de/v3.0/fam_mem.php?family_id=MYB
Ghir_D07G021870.1	bHLH	HLH	-	http://plntfdb.bio.uni-potsdam.de/v3.0/fam_mem.php?family_id=bHLH
Ghir_D08G021610	C2C2-GATA	GATA	-	http://plntfdb.bio.uni-potsdam.de/v3.0/fam_mem.php?family_id=C2C2-GATA
Ghir_A09G024100	AP2-EREBP	AP2	-	http://plntfdb.bio.uni-potsdam.de/v3.0/fam_mem.php?family_id=AP2-EREBP
Ghir_D11G030310	AP2-EREBP	AP2	-	http://plntfdb.bio.uni-potsdam.de/v3.0/fam_mem.php?family_id=AP2-EREBP
Ghir_D05G031990	TIG	TIG	-	http://plntfdb.bio.uni-potsdam.de/v3.0/fam_mem.php?family_id=TIG
Ghir_D11G025590	AP2-EREBP	AP2	-	http://plntfdb.bio.uni-potsdam.de/v3.0/fam_mem.php?family_id=AP2-EREBP
Ghir_D06G012760.1	Alfin-like	Alfin-like	DDT,Homeobox,JmjC,JmjN	http://plntfdb.bio.uni-potsdam.de/v3.0/fam_mem.php?family_id=Alfin-like
Ghir_D02G007540	GRAS	GRAS	-	http://plntfdb.bio.uni-potsdam.de/v3.0/fam_mem.php?family_id=GRAS
Ghir_A08G022110	bHLH	HLH	-	http://plntfdb.bio.uni-potsdam.de/v3.0/fam_mem.php?family_id=bHLH
Ghir_A11G006710	LOB	DUF260	-	http://plntfdb.bio.uni-potsdam.de/v3.0/fam_mem.php?family_id=LOB
Ghir_A04G015570	BBR/BPC	GAGA_bind	-	http://plntfdb.bio.uni-potsdam.de/v3.0/fam_mem.php?family_id=BBR/BPC
Ghir_A12G012150	AP2-EREBP	AP2	-	http://plntfdb.bio.uni-potsdam.de/v3.0/fam_mem.php?family_id=AP2-EREBP
BGI_novel_G001930	WRKY	WRKY	-	http://plntfdb.bio.uni-potsdam.de/v3.0/fam_mem.php?family_id=WRKY
Ghir_D12G013920	C2C2-GATA	GATA	-	http://plntfdb.bio.uni-potsdam.de/v3.0/fam_mem.php?family_id=C2C2-GATA
Ghir_A06G013600	MYB	Myb_DNA-binding	ARID,Response_reg,SNF2_N	http://plntfdb.bio.uni-potsdam.de/v3.0/fam_mem.php?family_id=MYB
Ghir_A07G011100	MYB	Myb_DNA-binding	ARID,Response_reg,SNF2_N	http://plntfdb.bio.uni-potsdam.de/v3.0/fam_mem.php?family_id=MYB
Ghir_A11G018890	FHA	FHA	-	http://plntfdb.bio.uni-potsdam.de/v3.0/fam_mem.php?family_id=FHA
Ghir_D06G008070	Alfin-like	Alfin-like	DDT,Homeobox,JmjC,JmjN	http://plntfdb.bio.uni-potsdam.de/v3.0/fam_mem.php?family_id=Alfin-like
Ghir_A03G017780	MYB	Myb_DNA-binding	ARID,Response_reg,SNF2_N	http://plntfdb.bio.uni-potsdam.de/v3.0/fam_mem.php?family_id=MYB
Ghir_D07G016150	MYB	Myb_DNA-binding	ARID,Response_reg,SNF2_N	http://plntfdb.bio.uni-potsdam.de/v3.0/fam_mem.php?family_id=MYB
Ghir_A01G017770	LOB	DUF260	-	http://plntfdb.bio.uni-potsdam.de/v3.0/fam_mem.php?family_id=LOB
Ghir_A03G020430	MYB	Myb_DNA-binding	ARID,Response_reg,SNF2_N	http://plntfdb.bio.uni-potsdam.de/v3.0/fam_mem.php?family_id=MYB
Ghir_D09G010050	C2H2	zf-C2H2	PHD	http://plntfdb.bio.uni-potsdam.de/v3.0/fam_mem.php?family_id=C2H2
Ghir_D04G005020	MYB	Myb_DNA-binding	ARID,Response_reg,SNF2_N	http://plntfdb.bio.uni-potsdam.de/v3.0/fam_mem.php?family_id=MYB
Ghir_A09G004990	WRKY	WRKY	-	http://plntfdb.bio.uni-potsdam.de/v3.0/fam_mem.php?family_id=WRKY
Ghir_A11G035310	GRAS	GRAS	-	http://plntfdb.bio.uni-potsdam.de/v3.0/fam_mem.php?family_id=GRAS
Ghir_A11G010500	bHLH	HLH	-	http://plntfdb.bio.uni-potsdam.de/v3.0/fam_mem.php?family_id=bHLH
Ghir_D08G017330	bHLH	HLH	-	http://plntfdb.bio.uni-potsdam.de/v3.0/fam_mem.php?family_id=bHLH
Ghir_A08G003280	bHLH	HLH	-	http://plntfdb.bio.uni-potsdam.de/v3.0/fam_mem.php?family_id=bHLH
Ghir_A13G005790	GRAS	GRAS	-	http://plntfdb.bio.uni-potsdam.de/v3.0/fam_mem.php?family_id=GRAS
Ghir_A13G008340.1	WRKY	WRKY	-	http://plntfdb.bio.uni-potsdam.de/v3.0/fam_mem.php?family_id=WRKY
Ghir_A05G031820.1	G2-like	G2-like	Response_reg	http://plntfdb.bio.uni-potsdam.de/v3.0/fam_mem.php?family_id=G2-like
Ghir_D06G018620	LIM	LIM	-	http://plntfdb.bio.uni-potsdam.de/v3.0/fam_mem.php?family_id=LIM
Ghir_D11G022020	bHLH	HLH	-	http://plntfdb.bio.uni-potsdam.de/v3.0/fam_mem.php?family_id=bHLH
Ghir_A10G003010.1	MADS	SRF-TF	-	http://plntfdb.bio.uni-potsdam.de/v3.0/fam_mem.php?family_id=MADS
Ghir_D02G000760	TAZ	zf-TAZ	PHD	http://plntfdb.bio.uni-potsdam.de/v3.0/fam_mem.php?family_id=TAZ
Ghir_A12G023330.1	GRAS	GRAS	-	http://plntfdb.bio.uni-potsdam.de/v3.0/fam_mem.php?family_id=GRAS
Ghir_D07G022910	AP2-EREBP	AP2	-	http://plntfdb.bio.uni-potsdam.de/v3.0/fam_mem.php?family_id=AP2-EREBP
Ghir_D05G002260	GRAS	GRAS	-	http://plntfdb.bio.uni-potsdam.de/v3.0/fam_mem.php?family_id=GRAS
Ghir_A07G011700	C2H2	zf-C2H2	PHD	http://plntfdb.bio.uni-potsdam.de/v3.0/fam_mem.php?family_id=C2H2
Ghir_D02G008860	HB	Homeobox,KNOX1,KNOX2	-	http://plntfdb.bio.uni-potsdam.de/v3.0/fam_mem.php?family_id=HB
Ghir_D11G003130	C3H	zf-CCCH	PHD,SNF2_N,zf-C2H2	http://plntfdb.bio.uni-potsdam.de/v3.0/fam_mem.php?family_id=C3H
Ghir_D08G012650	AP2-EREBP	AP2	-	http://plntfdb.bio.uni-potsdam.de/v3.0/fam_mem.php?family_id=AP2-EREBP
Ghir_A12G005890	MYB	Myb_DNA-binding	ARID,Response_reg,SNF2_N	http://plntfdb.bio.uni-potsdam.de/v3.0/fam_mem.php?family_id=MYB
Ghir_D06G018430	Alfin-like	Alfin-like	DDT,Homeobox,JmjC,JmjN	http://plntfdb.bio.uni-potsdam.de/v3.0/fam_mem.php?family_id=Alfin-like
Ghir_D02G024050	NAC	NAM	-	http://plntfdb.bio.uni-potsdam.de/v3.0/fam_mem.php?family_id=NAC
Ghir_A08G005620	GRAS	GRAS	-	http://plntfdb.bio.uni-potsdam.de/v3.0/fam_mem.php?family_id=GRAS
Ghir_A07G001550	MYB	Myb_DNA-binding	ARID,Response_reg,SNF2_N	http://plntfdb.bio.uni-potsdam.de/v3.0/fam_mem.php?family_id=MYB
Ghir_D05G008640	AP2-EREBP	AP2	-	http://plntfdb.bio.uni-potsdam.de/v3.0/fam_mem.php?family_id=AP2-EREBP
Ghir_A02G005450	GRAS	GRAS	-	http://plntfdb.bio.uni-potsdam.de/v3.0/fam_mem.php?family_id=GRAS
Ghir_D07G017200	AP2-EREBP	AP2	-	http://plntfdb.bio.uni-potsdam.de/v3.0/fam_mem.php?family_id=AP2-EREBP
Ghir_A07G002790.1	MYB	Myb_DNA-binding	ARID,Response_reg,SNF2_N	http://plntfdb.bio.uni-potsdam.de/v3.0/fam_mem.php?family_id=MYB
Ghir_D05G007970	MYB	Myb_DNA-binding	ARID,Response_reg,SNF2_N	http://plntfdb.bio.uni-potsdam.de/v3.0/fam_mem.php?family_id=MYB
Ghir_A07G005350	bHLH	HLH	-	http://plntfdb.bio.uni-potsdam.de/v3.0/fam_mem.php?family_id=bHLH
Ghir_D07G001940	Tify	tify	GATA	http://plntfdb.bio.uni-potsdam.de/v3.0/fam_mem.php?family_id=Tify
Ghir_A09G014670	GRF	QLQ,WRC	-	http://plntfdb.bio.uni-potsdam.de/v3.0/fam_mem.php?family_id=GRF
Ghir_A10G006590	NAC	NAM	-	http://plntfdb.bio.uni-potsdam.de/v3.0/fam_mem.php?family_id=NAC
Ghir_D02G005680	C2C2-GATA	GATA	-	http://plntfdb.bio.uni-potsdam.de/v3.0/fam_mem.php?family_id=C2C2-GATA
Ghir_D07G001730	AP2-EREBP	AP2	-	http://plntfdb.bio.uni-potsdam.de/v3.0/fam_mem.php?family_id=AP2-EREBP
Ghir_A09G009640	C2H2	zf-C2H2	PHD	http://plntfdb.bio.uni-potsdam.de/v3.0/fam_mem.php?family_id=C2H2
Ghir_D10G006390	LOB	DUF260	-	http://plntfdb.bio.uni-potsdam.de/v3.0/fam_mem.php?family_id=LOB
Ghir_A02G006740	bZIP	bZIP_1,bZIP_2,bZIP_Maf	HLH	http://plntfdb.bio.uni-potsdam.de/v3.0/fam_mem.php?family_id=bZIP
Ghir_A07G017790	bHLH	HLH	-	http://plntfdb.bio.uni-potsdam.de/v3.0/fam_mem.php?family_id=bHLH
Ghir_D02G005200	mTERF	mTERF	-	http://plntfdb.bio.uni-potsdam.de/v3.0/fam_mem.php?family_id=mTERF
Ghir_A12G006110	CSD	CSD	-	http://plntfdb.bio.uni-potsdam.de/v3.0/fam_mem.php?family_id=CSD
Ghir_A11G011040.1	NAC	NAM	-	http://plntfdb.bio.uni-potsdam.de/v3.0/fam_mem.php?family_id=NAC
Ghir_A09G022760	GRAS	GRAS	-	http://plntfdb.bio.uni-potsdam.de/v3.0/fam_mem.php?family_id=GRAS
Ghir_A05G016560	C2C2-Dof	zf-Dof	-	http://plntfdb.bio.uni-potsdam.de/v3.0/fam_mem.php?family_id=C2C2-Dof
Ghir_A11G035500	MYB	Myb_DNA-binding	ARID,Response_reg,SNF2_N	http://plntfdb.bio.uni-potsdam.de/v3.0/fam_mem.php?family_id=MYB
Ghir_A12G028440	G2-like	G2-like	Response_reg	http://plntfdb.bio.uni-potsdam.de/v3.0/fam_mem.php?family_id=G2-like
Ghir_D06G023770	MYB	Myb_DNA-binding	ARID,Response_reg,SNF2_N	http://plntfdb.bio.uni-potsdam.de/v3.0/fam_mem.php?family_id=MYB
Ghir_A03G009730	C3H	zf-CCCH	PHD,SNF2_N,zf-C2H2	http://plntfdb.bio.uni-potsdam.de/v3.0/fam_mem.php?family_id=C3H
BGI_novel_G001894	bHLH	HLH	-	http://plntfdb.bio.uni-potsdam.de/v3.0/fam_mem.php?family_id=bHLH
Ghir_A06G002390	BSD	BSD	-	http://plntfdb.bio.uni-potsdam.de/v3.0/fam_mem.php?family_id=BSD
BGI_novel_G000178	OFP	Ovate	-	http://plntfdb.bio.uni-potsdam.de/v3.0/fam_mem.php?family_id=OFP
Ghir_A11G021540	MYB	Myb_DNA-binding	ARID,Response_reg,SNF2_N	http://plntfdb.bio.uni-potsdam.de/v3.0/fam_mem.php?family_id=MYB
BGI_novel_G007228	AP2-EREBP	AP2	-	http://plntfdb.bio.uni-potsdam.de/v3.0/fam_mem.php?family_id=AP2-EREBP
Ghir_D05G029500	Trihelix	trihelix	-	http://plntfdb.bio.uni-potsdam.de/v3.0/fam_mem.php?family_id=Trihelix
Ghir_A06G001100.1	NAC	NAM	-	http://plntfdb.bio.uni-potsdam.de/v3.0/fam_mem.php?family_id=NAC
Ghir_D10G018960.1	CAMTA	CG-1,IQ	-	http://plntfdb.bio.uni-potsdam.de/v3.0/fam_mem.php?family_id=CAMTA
Ghir_A07G016840	AP2-EREBP	AP2	-	http://plntfdb.bio.uni-potsdam.de/v3.0/fam_mem.php?family_id=AP2-EREBP
Ghir_A11G007690	NAC	NAM	-	http://plntfdb.bio.uni-potsdam.de/v3.0/fam_mem.php?family_id=NAC
Ghir_D06G021600	LOB	DUF260	-	http://plntfdb.bio.uni-potsdam.de/v3.0/fam_mem.php?family_id=LOB
Ghir_A05G021010.1	AP2-EREBP	AP2	-	http://plntfdb.bio.uni-potsdam.de/v3.0/fam_mem.php?family_id=AP2-EREBP
Ghir_D09G024700	WRKY	WRKY	-	http://plntfdb.bio.uni-potsdam.de/v3.0/fam_mem.php?family_id=WRKY
Ghir_A13G019250	C2C2-CO-like	CCT,zf-B_box	GATA,PLATZ	http://plntfdb.bio.uni-potsdam.de/v3.0/fam_mem.php?family_id=C2C2-CO-like
Ghir_D13G024640	ABI3VP1	B3	AP2,Auxin_resp	http://plntfdb.bio.uni-potsdam.de/v3.0/fam_mem.php?family_id=ABI3VP1
Ghir_D02G007540.1	GRAS	GRAS	-	http://plntfdb.bio.uni-potsdam.de/v3.0/fam_mem.php?family_id=GRAS
Ghir_D12G009040	LOB	DUF260	-	http://plntfdb.bio.uni-potsdam.de/v3.0/fam_mem.php?family_id=LOB
Ghir_A10G011530	Tify	tify	GATA	http://plntfdb.bio.uni-potsdam.de/v3.0/fam_mem.php?family_id=Tify
Ghir_D13G002240	C2H2	zf-C2H2	PHD	http://plntfdb.bio.uni-potsdam.de/v3.0/fam_mem.php?family_id=C2H2
Ghir_D11G024210.8	C3H	zf-CCCH	PHD,SNF2_N,zf-C2H2	http://plntfdb.bio.uni-potsdam.de/v3.0/fam_mem.php?family_id=C3H
Ghir_D05G001890	AP2-EREBP	AP2	-	http://plntfdb.bio.uni-potsdam.de/v3.0/fam_mem.php?family_id=AP2-EREBP
Ghir_D12G019130	MADS	SRF-TF	-	http://plntfdb.bio.uni-potsdam.de/v3.0/fam_mem.php?family_id=MADS
Ghir_D13G002150	C2C2-Dof	zf-Dof	-	http://plntfdb.bio.uni-potsdam.de/v3.0/fam_mem.php?family_id=C2C2-Dof
Ghir_A03G021330	MYB	Myb_DNA-binding	ARID,Response_reg,SNF2_N	http://plntfdb.bio.uni-potsdam.de/v3.0/fam_mem.php?family_id=MYB
Ghir_D06G005360	PLATZ	PLATZ	-	http://plntfdb.bio.uni-potsdam.de/v3.0/fam_mem.php?family_id=PLATZ
Ghir_D04G007400	bHLH	HLH	-	http://plntfdb.bio.uni-potsdam.de/v3.0/fam_mem.php?family_id=bHLH
Ghir_A10G007160	AP2-EREBP	AP2	-	http://plntfdb.bio.uni-potsdam.de/v3.0/fam_mem.php?family_id=AP2-EREBP
Ghir_A02G004490	MYB	Myb_DNA-binding	ARID,Response_reg,SNF2_N	http://plntfdb.bio.uni-potsdam.de/v3.0/fam_mem.php?family_id=MYB
Ghir_A09G018360	MYB	Myb_DNA-binding	ARID,Response_reg,SNF2_N	http://plntfdb.bio.uni-potsdam.de/v3.0/fam_mem.php?family_id=MYB
Ghir_D13G001690.3	C3H	zf-CCCH	PHD,SNF2_N,zf-C2H2	http://plntfdb.bio.uni-potsdam.de/v3.0/fam_mem.php?family_id=C3H
Ghir_D01G002690	mTERF	mTERF	-	http://plntfdb.bio.uni-potsdam.de/v3.0/fam_mem.php?family_id=mTERF
Ghir_A13G003450	ABI3VP1	B3	AP2,Auxin_resp	http://plntfdb.bio.uni-potsdam.de/v3.0/fam_mem.php?family_id=ABI3VP1
Ghir_A07G002170	WRKY	WRKY	-	http://plntfdb.bio.uni-potsdam.de/v3.0/fam_mem.php?family_id=WRKY
Ghir_A11G021210	AP2-EREBP	AP2	-	http://plntfdb.bio.uni-potsdam.de/v3.0/fam_mem.php?family_id=AP2-EREBP
Ghir_D01G015410	Tify	tify	GATA	http://plntfdb.bio.uni-potsdam.de/v3.0/fam_mem.php?family_id=Tify
Ghir_D10G022230	NAC	NAM	-	http://plntfdb.bio.uni-potsdam.de/v3.0/fam_mem.php?family_id=NAC
Ghir_A01G010280	MYB	Myb_DNA-binding	ARID,Response_reg,SNF2_N	http://plntfdb.bio.uni-potsdam.de/v3.0/fam_mem.php?family_id=MYB
Ghir_A05G007650	C2H2	zf-C2H2	PHD	http://plntfdb.bio.uni-potsdam.de/v3.0/fam_mem.php?family_id=C2H2
Ghir_D01G019100	ABI3VP1	B3	AP2,Auxin_resp	http://plntfdb.bio.uni-potsdam.de/v3.0/fam_mem.php?family_id=ABI3VP1
Ghir_A07G003920	ABI3VP1	B3	AP2,Auxin_resp	http://plntfdb.bio.uni-potsdam.de/v3.0/fam_mem.php?family_id=ABI3VP1
Ghir_D11G021420	TAZ	zf-TAZ	PHD	http://plntfdb.bio.uni-potsdam.de/v3.0/fam_mem.php?family_id=TAZ
Ghir_D09G024600	AP2-EREBP	AP2	-	http://plntfdb.bio.uni-potsdam.de/v3.0/fam_mem.php?family_id=AP2-EREBP
Ghir_A04G012980	MYB	Myb_DNA-binding	ARID,Response_reg,SNF2_N	http://plntfdb.bio.uni-potsdam.de/v3.0/fam_mem.php?family_id=MYB
Ghir_D12G027440	LOB	DUF260	-	http://plntfdb.bio.uni-potsdam.de/v3.0/fam_mem.php?family_id=LOB
Ghir_A11G034860	MYB	Myb_DNA-binding	ARID,Response_reg,SNF2_N	http://plntfdb.bio.uni-potsdam.de/v3.0/fam_mem.php?family_id=MYB
Ghir_A03G012920	WRKY	WRKY	-	http://plntfdb.bio.uni-potsdam.de/v3.0/fam_mem.php?family_id=WRKY
Ghir_A05G039180	WRKY	WRKY	-	http://plntfdb.bio.uni-potsdam.de/v3.0/fam_mem.php?family_id=WRKY
Ghir_A07G014000	bHLH	HLH	-	http://plntfdb.bio.uni-potsdam.de/v3.0/fam_mem.php?family_id=bHLH
Ghir_A07G012700	C2H2	zf-C2H2	PHD	http://plntfdb.bio.uni-potsdam.de/v3.0/fam_mem.php?family_id=C2H2
Ghir_A01G003440	NAC	NAM	-	http://plntfdb.bio.uni-potsdam.de/v3.0/fam_mem.php?family_id=NAC
Ghir_D12G024710	AP2-EREBP	AP2	-	http://plntfdb.bio.uni-potsdam.de/v3.0/fam_mem.php?family_id=AP2-EREBP
Ghir_D06G022660	VOZ	VOZ	-	http://plntfdb.bio.uni-potsdam.de/v3.0/fam_mem.php?family_id=VOZ
Ghir_D02G021400	MYB	Myb_DNA-binding	ARID,Response_reg,SNF2_N	http://plntfdb.bio.uni-potsdam.de/v3.0/fam_mem.php?family_id=MYB
Ghir_D05G014610	LOB	DUF260	-	http://plntfdb.bio.uni-potsdam.de/v3.0/fam_mem.php?family_id=LOB
Ghir_A07G015770.2	SBP	SBP	-	http://plntfdb.bio.uni-potsdam.de/v3.0/fam_mem.php?family_id=SBP
Ghir_A03G023100	MADS	SRF-TF	-	http://plntfdb.bio.uni-potsdam.de/v3.0/fam_mem.php?family_id=MADS
Ghir_D05G024470	GRAS	GRAS	-	http://plntfdb.bio.uni-potsdam.de/v3.0/fam_mem.php?family_id=GRAS
Ghir_D01G002650	mTERF	mTERF	-	http://plntfdb.bio.uni-potsdam.de/v3.0/fam_mem.php?family_id=mTERF
Ghir_D02G003500	FHA	FHA	-	http://plntfdb.bio.uni-potsdam.de/v3.0/fam_mem.php?family_id=FHA
Ghir_A12G017470	NAC	NAM	-	http://plntfdb.bio.uni-potsdam.de/v3.0/fam_mem.php?family_id=NAC
Ghir_D02G019080	MYB	Myb_DNA-binding	ARID,Response_reg,SNF2_N	http://plntfdb.bio.uni-potsdam.de/v3.0/fam_mem.php?family_id=MYB
Ghir_A05G023300	AP2-EREBP	AP2	-	http://plntfdb.bio.uni-potsdam.de/v3.0/fam_mem.php?family_id=AP2-EREBP
Ghir_A01G005100	TCP	TCP	-	http://plntfdb.bio.uni-potsdam.de/v3.0/fam_mem.php?family_id=TCP
Ghir_D05G006030	AP2-EREBP	AP2	-	http://plntfdb.bio.uni-potsdam.de/v3.0/fam_mem.php?family_id=AP2-EREBP
Ghir_D12G016800	HSF	HSF_DNA-bind	-	http://plntfdb.bio.uni-potsdam.de/v3.0/fam_mem.php?family_id=HSF
Ghir_A11G010510	AP2-EREBP	AP2	-	http://plntfdb.bio.uni-potsdam.de/v3.0/fam_mem.php?family_id=AP2-EREBP
Ghir_A05G024650	GRAS	GRAS	-	http://plntfdb.bio.uni-potsdam.de/v3.0/fam_mem.php?family_id=GRAS
Ghir_Scaffold923G000020	Sigma70-like	Sigma70_r2,Sigma70_r3,Sigma70_r4	-	http://plntfdb.bio.uni-potsdam.de/v3.0/fam_mem.php?family_id=Sigma70-like
Ghir_D13G007830	G2-like	G2-like	Response_reg	http://plntfdb.bio.uni-potsdam.de/v3.0/fam_mem.php?family_id=G2-like
Ghir_A01G012770	E2F-DP	E2F_TDP	-	http://plntfdb.bio.uni-potsdam.de/v3.0/fam_mem.php?family_id=E2F-DP
Ghir_D01G019030	C2H2	zf-C2H2	PHD	http://plntfdb.bio.uni-potsdam.de/v3.0/fam_mem.php?family_id=C2H2
Ghir_D06G000890	C2H2	zf-C2H2	PHD	http://plntfdb.bio.uni-potsdam.de/v3.0/fam_mem.php?family_id=C2H2
Ghir_A11G004700	NAC	NAM	-	http://plntfdb.bio.uni-potsdam.de/v3.0/fam_mem.php?family_id=NAC
Ghir_A03G019190.1	CAMTA	CG-1,IQ	-	http://plntfdb.bio.uni-potsdam.de/v3.0/fam_mem.php?family_id=CAMTA
Ghir_A09G008010	ABI3VP1	B3	AP2,Auxin_resp	http://plntfdb.bio.uni-potsdam.de/v3.0/fam_mem.php?family_id=ABI3VP1
Ghir_D06G010440	MYB	Myb_DNA-binding	ARID,Response_reg,SNF2_N	http://plntfdb.bio.uni-potsdam.de/v3.0/fam_mem.php?family_id=MYB
Ghir_D05G023700	GRAS	GRAS	-	http://plntfdb.bio.uni-potsdam.de/v3.0/fam_mem.php?family_id=GRAS
Ghir_A09G024590	BSD	BSD	-	http://plntfdb.bio.uni-potsdam.de/v3.0/fam_mem.php?family_id=BSD
Ghir_D01G020350	bHLH	HLH	-	http://plntfdb.bio.uni-potsdam.de/v3.0/fam_mem.php?family_id=bHLH
Ghir_D06G010690	WRKY	WRKY	-	http://plntfdb.bio.uni-potsdam.de/v3.0/fam_mem.php?family_id=WRKY
Ghir_A11G034860.1	MYB	Myb_DNA-binding	ARID,Response_reg,SNF2_N	http://plntfdb.bio.uni-potsdam.de/v3.0/fam_mem.php?family_id=MYB
Ghir_A04G014130	MADS	SRF-TF	-	http://plntfdb.bio.uni-potsdam.de/v3.0/fam_mem.php?family_id=MADS
Ghir_A03G005190	GRAS	GRAS	-	http://plntfdb.bio.uni-potsdam.de/v3.0/fam_mem.php?family_id=GRAS
Ghir_D07G007100	C3H	zf-CCCH	PHD,SNF2_N,zf-C2H2	http://plntfdb.bio.uni-potsdam.de/v3.0/fam_mem.php?family_id=C3H
Ghir_D12G002860	bHLH	HLH	-	http://plntfdb.bio.uni-potsdam.de/v3.0/fam_mem.php?family_id=bHLH
Ghir_D12G011260	MADS	SRF-TF	-	http://plntfdb.bio.uni-potsdam.de/v3.0/fam_mem.php?family_id=MADS
Ghir_A06G007950	MYB	Myb_DNA-binding	ARID,Response_reg,SNF2_N	http://plntfdb.bio.uni-potsdam.de/v3.0/fam_mem.php?family_id=MYB
Ghir_A10G023360	LIM	LIM	-	http://plntfdb.bio.uni-potsdam.de/v3.0/fam_mem.php?family_id=LIM
Ghir_D13G006630	MYB	Myb_DNA-binding	ARID,Response_reg,SNF2_N	http://plntfdb.bio.uni-potsdam.de/v3.0/fam_mem.php?family_id=MYB
Ghir_A06G003880	AP2-EREBP	AP2	-	http://plntfdb.bio.uni-potsdam.de/v3.0/fam_mem.php?family_id=AP2-EREBP
Ghir_D08G015500	MYB	Myb_DNA-binding	ARID,Response_reg,SNF2_N	http://plntfdb.bio.uni-potsdam.de/v3.0/fam_mem.php?family_id=MYB
Ghir_A04G014430	ABI3VP1	B3	AP2,Auxin_resp	http://plntfdb.bio.uni-potsdam.de/v3.0/fam_mem.php?family_id=ABI3VP1
Ghir_A12G012530	NAC	NAM	-	http://plntfdb.bio.uni-potsdam.de/v3.0/fam_mem.php?family_id=NAC
Ghir_D03G003520	AP2-EREBP	AP2	-	http://plntfdb.bio.uni-potsdam.de/v3.0/fam_mem.php?family_id=AP2-EREBP
Ghir_A03G018390	MYB	Myb_DNA-binding	ARID,Response_reg,SNF2_N	http://plntfdb.bio.uni-potsdam.de/v3.0/fam_mem.php?family_id=MYB
Ghir_D09G010980	bHLH	HLH	-	http://plntfdb.bio.uni-potsdam.de/v3.0/fam_mem.php?family_id=bHLH
Ghir_A11G010920	bHLH	HLH	-	http://plntfdb.bio.uni-potsdam.de/v3.0/fam_mem.php?family_id=bHLH
Ghir_A07G015980	NAC	NAM	-	http://plntfdb.bio.uni-potsdam.de/v3.0/fam_mem.php?family_id=NAC
Ghir_A01G002710	mTERF	mTERF	-	http://plntfdb.bio.uni-potsdam.de/v3.0/fam_mem.php?family_id=mTERF
Ghir_A05G028560	LOB	DUF260	-	http://plntfdb.bio.uni-potsdam.de/v3.0/fam_mem.php?family_id=LOB
Ghir_D07G001270	bHLH	HLH	-	http://plntfdb.bio.uni-potsdam.de/v3.0/fam_mem.php?family_id=bHLH
Ghir_D12G018060	AP2-EREBP	AP2	-	http://plntfdb.bio.uni-potsdam.de/v3.0/fam_mem.php?family_id=AP2-EREBP
Ghir_D05G012400	C2H2	zf-C2H2	PHD	http://plntfdb.bio.uni-potsdam.de/v3.0/fam_mem.php?family_id=C2H2
Ghir_D08G018090.1	C2C2-GATA	GATA	-	http://plntfdb.bio.uni-potsdam.de/v3.0/fam_mem.php?family_id=C2C2-GATA
Ghir_A05G019710	zf-HD	ZF-HD_dimer	-	http://plntfdb.bio.uni-potsdam.de/v3.0/fam_mem.php?family_id=zf-HD
Ghir_D07G012260	BSD	BSD	-	http://plntfdb.bio.uni-potsdam.de/v3.0/fam_mem.php?family_id=BSD
Ghir_D02G022510	ABI3VP1	B3	AP2,Auxin_resp	http://plntfdb.bio.uni-potsdam.de/v3.0/fam_mem.php?family_id=ABI3VP1
Ghir_D07G008220	C3H	zf-CCCH	PHD,SNF2_N,zf-C2H2	http://plntfdb.bio.uni-potsdam.de/v3.0/fam_mem.php?family_id=C3H
Ghir_D03G016670	LIM	LIM	-	http://plntfdb.bio.uni-potsdam.de/v3.0/fam_mem.php?family_id=LIM
Ghir_D08G000240	AP2-EREBP	AP2	-	http://plntfdb.bio.uni-potsdam.de/v3.0/fam_mem.php?family_id=AP2-EREBP
Ghir_A12G012070	VARL	VARL	-	http://plntfdb.bio.uni-potsdam.de/v3.0/fam_mem.php?family_id=VARL
Ghir_D13G003990	AP2-EREBP	AP2	-	http://plntfdb.bio.uni-potsdam.de/v3.0/fam_mem.php?family_id=AP2-EREBP
Ghir_D12G000600	BSD	BSD	-	http://plntfdb.bio.uni-potsdam.de/v3.0/fam_mem.php?family_id=BSD
Ghir_D10G008850	ARF	Auxin_resp	-	http://plntfdb.bio.uni-potsdam.de/v3.0/fam_mem.php?family_id=ARF
Ghir_D13G014750	WRKY	WRKY	-	http://plntfdb.bio.uni-potsdam.de/v3.0/fam_mem.php?family_id=WRKY
Ghir_D13G003710.1	ABI3VP1	B3	AP2,Auxin_resp	http://plntfdb.bio.uni-potsdam.de/v3.0/fam_mem.php?family_id=ABI3VP1
Ghir_D07G008790	MADS	SRF-TF	-	http://plntfdb.bio.uni-potsdam.de/v3.0/fam_mem.php?family_id=MADS
Ghir_A02G012400	AP2-EREBP	AP2	-	http://plntfdb.bio.uni-potsdam.de/v3.0/fam_mem.php?family_id=AP2-EREBP
Ghir_A05G011940	G2-like	G2-like	Response_reg	http://plntfdb.bio.uni-potsdam.de/v3.0/fam_mem.php?family_id=G2-like
Ghir_D11G010840	bHLH	HLH	-	http://plntfdb.bio.uni-potsdam.de/v3.0/fam_mem.php?family_id=bHLH
Ghir_D05G027570	bZIP	bZIP_1,bZIP_2,bZIP_Maf	HLH	http://plntfdb.bio.uni-potsdam.de/v3.0/fam_mem.php?family_id=bZIP
Ghir_A12G028480	C2H2	zf-C2H2	PHD	http://plntfdb.bio.uni-potsdam.de/v3.0/fam_mem.php?family_id=C2H2
Ghir_A05G017980	GRAS	GRAS	-	http://plntfdb.bio.uni-potsdam.de/v3.0/fam_mem.php?family_id=GRAS
Ghir_D08G002860	NOZZLE	NOZZLE_Angio	-	http://plntfdb.bio.uni-potsdam.de/v3.0/fam_mem.php?family_id=NOZZLE
Ghir_A13G003540	G2-like	G2-like	Response_reg	http://plntfdb.bio.uni-potsdam.de/v3.0/fam_mem.php?family_id=G2-like
Ghir_A10G016180.3	ARF	Auxin_resp	-	http://plntfdb.bio.uni-potsdam.de/v3.0/fam_mem.php?family_id=ARF
Ghir_A07G003550	AP2-EREBP	AP2	-	http://plntfdb.bio.uni-potsdam.de/v3.0/fam_mem.php?family_id=AP2-EREBP
Ghir_D01G021490	bZIP	bZIP_1,bZIP_2,bZIP_Maf	HLH	http://plntfdb.bio.uni-potsdam.de/v3.0/fam_mem.php?family_id=bZIP
Ghir_A03G004010	ARF	Auxin_resp	-	http://plntfdb.bio.uni-potsdam.de/v3.0/fam_mem.php?family_id=ARF
Ghir_A01G019790	NAC	NAM	-	http://plntfdb.bio.uni-potsdam.de/v3.0/fam_mem.php?family_id=NAC
Ghir_A07G006060.1	TAZ	zf-TAZ	PHD	http://plntfdb.bio.uni-potsdam.de/v3.0/fam_mem.php?family_id=TAZ
Ghir_D09G025550.1	MYB	Myb_DNA-binding	ARID,Response_reg,SNF2_N	http://plntfdb.bio.uni-potsdam.de/v3.0/fam_mem.php?family_id=MYB
Ghir_A12G006670.1	GRAS	GRAS	-	http://plntfdb.bio.uni-potsdam.de/v3.0/fam_mem.php?family_id=GRAS
Ghir_D12G025640	AP2-EREBP	AP2	-	http://plntfdb.bio.uni-potsdam.de/v3.0/fam_mem.php?family_id=AP2-EREBP
Ghir_A09G004190.4	MYB	Myb_DNA-binding	ARID,Response_reg,SNF2_N	http://plntfdb.bio.uni-potsdam.de/v3.0/fam_mem.php?family_id=MYB
Ghir_D05G034140	MADS	SRF-TF	-	http://plntfdb.bio.uni-potsdam.de/v3.0/fam_mem.php?family_id=MADS
Ghir_D13G021350	Alfin-like	Alfin-like	DDT,Homeobox,JmjC,JmjN	http://plntfdb.bio.uni-potsdam.de/v3.0/fam_mem.php?family_id=Alfin-like
Ghir_D12G005360	ARF	Auxin_resp	-	http://plntfdb.bio.uni-potsdam.de/v3.0/fam_mem.php?family_id=ARF
Ghir_A06G016330	HB	Homeobox,KNOX1,KNOX2	-	http://plntfdb.bio.uni-potsdam.de/v3.0/fam_mem.php?family_id=HB
Ghir_D09G016860	G2-like	G2-like	Response_reg	http://plntfdb.bio.uni-potsdam.de/v3.0/fam_mem.php?family_id=G2-like
Ghir_D03G017480	NAC	NAM	-	http://plntfdb.bio.uni-potsdam.de/v3.0/fam_mem.php?family_id=NAC
Ghir_A03G017080	C2H2	zf-C2H2	PHD	http://plntfdb.bio.uni-potsdam.de/v3.0/fam_mem.php?family_id=C2H2
Ghir_A07G002250	LOB	DUF260	-	http://plntfdb.bio.uni-potsdam.de/v3.0/fam_mem.php?family_id=LOB
Ghir_D05G025430	MADS	SRF-TF	-	http://plntfdb.bio.uni-potsdam.de/v3.0/fam_mem.php?family_id=MADS
Ghir_D12G005490	LOB	DUF260	-	http://plntfdb.bio.uni-potsdam.de/v3.0/fam_mem.php?family_id=LOB
Ghir_A01G009280	SBP	SBP	-	http://plntfdb.bio.uni-potsdam.de/v3.0/fam_mem.php?family_id=SBP
Ghir_D09G014440.1	GRF	QLQ,WRC	-	http://plntfdb.bio.uni-potsdam.de/v3.0/fam_mem.php?family_id=GRF
Ghir_D09G025740	OFP	Ovate	-	http://plntfdb.bio.uni-potsdam.de/v3.0/fam_mem.php?family_id=OFP
Ghir_A05G035670	LOB	DUF260	-	http://plntfdb.bio.uni-potsdam.de/v3.0/fam_mem.php?family_id=LOB
Ghir_D11G003470	bHLH	HLH	-	http://plntfdb.bio.uni-potsdam.de/v3.0/fam_mem.php?family_id=bHLH
Ghir_D13G016290.1	bZIP	bZIP_1,bZIP_2,bZIP_Maf	HLH	http://plntfdb.bio.uni-potsdam.de/v3.0/fam_mem.php?family_id=bZIP
Ghir_A12G015320	MYB	Myb_DNA-binding	ARID,Response_reg,SNF2_N	http://plntfdb.bio.uni-potsdam.de/v3.0/fam_mem.php?family_id=MYB
Ghir_A07G002060	MYB	Myb_DNA-binding	ARID,Response_reg,SNF2_N	http://plntfdb.bio.uni-potsdam.de/v3.0/fam_mem.php?family_id=MYB
Ghir_D05G001250.2	Tify	tify	GATA	http://plntfdb.bio.uni-potsdam.de/v3.0/fam_mem.php?family_id=Tify
Ghir_A08G019920.1	AP2-EREBP	AP2	-	http://plntfdb.bio.uni-potsdam.de/v3.0/fam_mem.php?family_id=AP2-EREBP
Ghir_A07G017150	FAR1	FAR1	-	http://plntfdb.bio.uni-potsdam.de/v3.0/fam_mem.php?family_id=FAR1
Ghir_D11G009370	LIM	LIM	-	http://plntfdb.bio.uni-potsdam.de/v3.0/fam_mem.php?family_id=LIM
Ghir_A05G009570	G2-like	G2-like	Response_reg	http://plntfdb.bio.uni-potsdam.de/v3.0/fam_mem.php?family_id=G2-like
Ghir_A01G020970	AP2-EREBP	AP2	-	http://plntfdb.bio.uni-potsdam.de/v3.0/fam_mem.php?family_id=AP2-EREBP
Ghir_D02G015400	SBP	SBP	-	http://plntfdb.bio.uni-potsdam.de/v3.0/fam_mem.php?family_id=SBP
Ghir_A03G016780	NAC	NAM	-	http://plntfdb.bio.uni-potsdam.de/v3.0/fam_mem.php?family_id=NAC
Ghir_A03G000800	ARR-B	G2-like,Myb_DNA-binding,Response_reg	CCT	http://plntfdb.bio.uni-potsdam.de/v3.0/fam_mem.php?family_id=ARR-B
Ghir_A13G003720.1	ABI3VP1	B3	AP2,Auxin_resp	http://plntfdb.bio.uni-potsdam.de/v3.0/fam_mem.php?family_id=ABI3VP1
Ghir_D02G021410.1	LIM	LIM	-	http://plntfdb.bio.uni-potsdam.de/v3.0/fam_mem.php?family_id=LIM
Ghir_D06G023450	Trihelix	trihelix	-	http://plntfdb.bio.uni-potsdam.de/v3.0/fam_mem.php?family_id=Trihelix
Ghir_A09G020840	PLATZ	PLATZ	-	http://plntfdb.bio.uni-potsdam.de/v3.0/fam_mem.php?family_id=PLATZ
Ghir_A05G027940.1	C2H2	zf-C2H2	PHD	http://plntfdb.bio.uni-potsdam.de/v3.0/fam_mem.php?family_id=C2H2
Ghir_D04G020970.1	NAC	NAM	-	http://plntfdb.bio.uni-potsdam.de/v3.0/fam_mem.php?family_id=NAC
Ghir_A11G020350	ABI3VP1	B3	AP2,Auxin_resp	http://plntfdb.bio.uni-potsdam.de/v3.0/fam_mem.php?family_id=ABI3VP1
Ghir_A02G018080.1	GRAS	GRAS	-	http://plntfdb.bio.uni-potsdam.de/v3.0/fam_mem.php?family_id=GRAS
Ghir_A05G007440	C2H2	zf-C2H2	PHD	http://plntfdb.bio.uni-potsdam.de/v3.0/fam_mem.php?family_id=C2H2
Ghir_A11G000910	AP2-EREBP	AP2	-	http://plntfdb.bio.uni-potsdam.de/v3.0/fam_mem.php?family_id=AP2-EREBP
Ghir_A08G010300	E2F-DP	E2F_TDP	-	http://plntfdb.bio.uni-potsdam.de/v3.0/fam_mem.php?family_id=E2F-DP
Ghir_D02G011150	C3H	zf-CCCH	PHD,SNF2_N,zf-C2H2	http://plntfdb.bio.uni-potsdam.de/v3.0/fam_mem.php?family_id=C3H
Ghir_D04G018700	MADS	SRF-TF	-	http://plntfdb.bio.uni-potsdam.de/v3.0/fam_mem.php?family_id=MADS
Ghir_D12G014460.1	MYB	Myb_DNA-binding	ARID,Response_reg,SNF2_N	http://plntfdb.bio.uni-potsdam.de/v3.0/fam_mem.php?family_id=MYB
Ghir_A08G000470	C2C2-Dof	zf-Dof	-	http://plntfdb.bio.uni-potsdam.de/v3.0/fam_mem.php?family_id=C2C2-Dof
BGI_novel_G001576	VOZ	VOZ	-	http://plntfdb.bio.uni-potsdam.de/v3.0/fam_mem.php?family_id=VOZ
Ghir_D02G006300	SBP	SBP	-	http://plntfdb.bio.uni-potsdam.de/v3.0/fam_mem.php?family_id=SBP
Ghir_A12G007850	LOB	DUF260	-	http://plntfdb.bio.uni-potsdam.de/v3.0/fam_mem.php?family_id=LOB
Ghir_A13G004930	C2C2-GATA	GATA	-	http://plntfdb.bio.uni-potsdam.de/v3.0/fam_mem.php?family_id=C2C2-GATA
Ghir_D03G006060	C2C2-GATA	GATA	-	http://plntfdb.bio.uni-potsdam.de/v3.0/fam_mem.php?family_id=C2C2-GATA
Ghir_D09G005820	bHLH	HLH	-	http://plntfdb.bio.uni-potsdam.de/v3.0/fam_mem.php?family_id=bHLH
Ghir_D04G005180	zf-HD	ZF-HD_dimer	-	http://plntfdb.bio.uni-potsdam.de/v3.0/fam_mem.php?family_id=zf-HD
Ghir_A05G020330	G2-like	G2-like	Response_reg	http://plntfdb.bio.uni-potsdam.de/v3.0/fam_mem.php?family_id=G2-like
Ghir_D08G018890	NAC	NAM	-	http://plntfdb.bio.uni-potsdam.de/v3.0/fam_mem.php?family_id=NAC
Ghir_D12G025560	ABI3VP1	B3	AP2,Auxin_resp	http://plntfdb.bio.uni-potsdam.de/v3.0/fam_mem.php?family_id=ABI3VP1
Ghir_D01G015020	C2H2	zf-C2H2	PHD	http://plntfdb.bio.uni-potsdam.de/v3.0/fam_mem.php?family_id=C2H2
Ghir_A02G007100	GRAS	GRAS	-	http://plntfdb.bio.uni-potsdam.de/v3.0/fam_mem.php?family_id=GRAS
Ghir_A11G034080	bHLH	HLH	-	http://plntfdb.bio.uni-potsdam.de/v3.0/fam_mem.php?family_id=bHLH
Ghir_D10G023930	C2H2	zf-C2H2	PHD	http://plntfdb.bio.uni-potsdam.de/v3.0/fam_mem.php?family_id=C2H2
Ghir_A10G019640.2	FAR1	FAR1	-	http://plntfdb.bio.uni-potsdam.de/v3.0/fam_mem.php?family_id=FAR1
Ghir_A10G005580.1	C2H2	zf-C2H2	PHD	http://plntfdb.bio.uni-potsdam.de/v3.0/fam_mem.php?family_id=C2H2
Ghir_A06G006910	AP2-EREBP	AP2	-	http://plntfdb.bio.uni-potsdam.de/v3.0/fam_mem.php?family_id=AP2-EREBP
Ghir_D09G004910	MYB	Myb_DNA-binding	ARID,Response_reg,SNF2_N	http://plntfdb.bio.uni-potsdam.de/v3.0/fam_mem.php?family_id=MYB
Ghir_D07G022430	WRKY	WRKY	-	http://plntfdb.bio.uni-potsdam.de/v3.0/fam_mem.php?family_id=WRKY
Ghir_D07G007220	MADS	SRF-TF	-	http://plntfdb.bio.uni-potsdam.de/v3.0/fam_mem.php?family_id=MADS
Ghir_D10G016060	Tify	tify	GATA	http://plntfdb.bio.uni-potsdam.de/v3.0/fam_mem.php?family_id=Tify
Ghir_D10G010160	LOB	DUF260	-	http://plntfdb.bio.uni-potsdam.de/v3.0/fam_mem.php?family_id=LOB
BGI_novel_G000842	TUB	Tub	-	http://plntfdb.bio.uni-potsdam.de/v3.0/fam_mem.php?family_id=TUB
Ghir_A13G003440	ABI3VP1	B3	AP2,Auxin_resp	http://plntfdb.bio.uni-potsdam.de/v3.0/fam_mem.php?family_id=ABI3VP1
Ghir_A01G017540	ABI3VP1	B3	AP2,Auxin_resp	http://plntfdb.bio.uni-potsdam.de/v3.0/fam_mem.php?family_id=ABI3VP1
BGI_novel_G000322	GRAS	GRAS	-	http://plntfdb.bio.uni-potsdam.de/v3.0/fam_mem.php?family_id=GRAS
Ghir_D03G009850	Trihelix	trihelix	-	http://plntfdb.bio.uni-potsdam.de/v3.0/fam_mem.php?family_id=Trihelix
Ghir_D13G017800	MYB	Myb_DNA-binding	ARID,Response_reg,SNF2_N	http://plntfdb.bio.uni-potsdam.de/v3.0/fam_mem.php?family_id=MYB
Ghir_D10G021610.1	bHLH	HLH	-	http://plntfdb.bio.uni-potsdam.de/v3.0/fam_mem.php?family_id=bHLH
Ghir_D08G024200	HSF	HSF_DNA-bind	-	http://plntfdb.bio.uni-potsdam.de/v3.0/fam_mem.php?family_id=HSF
Ghir_D05G018330	RWP-RK	RWP-RK	-	http://plntfdb.bio.uni-potsdam.de/v3.0/fam_mem.php?family_id=RWP-RK
Ghir_A07G022970	NAC	NAM	-	http://plntfdb.bio.uni-potsdam.de/v3.0/fam_mem.php?family_id=NAC
Ghir_A02G016500	GRF	QLQ,WRC	-	http://plntfdb.bio.uni-potsdam.de/v3.0/fam_mem.php?family_id=GRF
Ghir_A11G030450	bHLH	HLH	-	http://plntfdb.bio.uni-potsdam.de/v3.0/fam_mem.php?family_id=bHLH
Ghir_D01G022110	E2F-DP	E2F_TDP	-	http://plntfdb.bio.uni-potsdam.de/v3.0/fam_mem.php?family_id=E2F-DP
Ghir_A08G018090	MYB	Myb_DNA-binding	ARID,Response_reg,SNF2_N	http://plntfdb.bio.uni-potsdam.de/v3.0/fam_mem.php?family_id=MYB
Ghir_A10G009090	LOB	DUF260	-	http://plntfdb.bio.uni-potsdam.de/v3.0/fam_mem.php?family_id=LOB
Ghir_D02G013430.2	MADS	SRF-TF	-	http://plntfdb.bio.uni-potsdam.de/v3.0/fam_mem.php?family_id=MADS
Ghir_D12G016350	SBP	SBP	-	http://plntfdb.bio.uni-potsdam.de/v3.0/fam_mem.php?family_id=SBP
Ghir_D12G014830	MYB	Myb_DNA-binding	ARID,Response_reg,SNF2_N	http://plntfdb.bio.uni-potsdam.de/v3.0/fam_mem.php?family_id=MYB
Ghir_D07G013360	MYB	Myb_DNA-binding	ARID,Response_reg,SNF2_N	http://plntfdb.bio.uni-potsdam.de/v3.0/fam_mem.php?family_id=MYB
Ghir_A05G025710	AP2-EREBP	AP2	-	http://plntfdb.bio.uni-potsdam.de/v3.0/fam_mem.php?family_id=AP2-EREBP
Ghir_A11G003600	MYB	Myb_DNA-binding	ARID,Response_reg,SNF2_N	http://plntfdb.bio.uni-potsdam.de/v3.0/fam_mem.php?family_id=MYB
Ghir_A11G019360	zf-HD	ZF-HD_dimer	-	http://plntfdb.bio.uni-potsdam.de/v3.0/fam_mem.php?family_id=zf-HD
Ghir_D05G021360	LOB	DUF260	-	http://plntfdb.bio.uni-potsdam.de/v3.0/fam_mem.php?family_id=LOB
Ghir_D04G013880	MYB	Myb_DNA-binding	ARID,Response_reg,SNF2_N	http://plntfdb.bio.uni-potsdam.de/v3.0/fam_mem.php?family_id=MYB
Ghir_A06G006200	G2-like	G2-like	Response_reg	http://plntfdb.bio.uni-potsdam.de/v3.0/fam_mem.php?family_id=G2-like
Ghir_A12G025620	AP2-EREBP	AP2	-	http://plntfdb.bio.uni-potsdam.de/v3.0/fam_mem.php?family_id=AP2-EREBP
Ghir_D13G025230	TCP	TCP	-	http://plntfdb.bio.uni-potsdam.de/v3.0/fam_mem.php?family_id=TCP
Ghir_A13G009020.1	BBR/BPC	GAGA_bind	-	http://plntfdb.bio.uni-potsdam.de/v3.0/fam_mem.php?family_id=BBR/BPC
Ghir_D01G007790	AP2-EREBP	AP2	-	http://plntfdb.bio.uni-potsdam.de/v3.0/fam_mem.php?family_id=AP2-EREBP
Ghir_A07G005320	ARF	Auxin_resp	-	http://plntfdb.bio.uni-potsdam.de/v3.0/fam_mem.php?family_id=ARF
Ghir_A02G014430	bHLH	HLH	-	http://plntfdb.bio.uni-potsdam.de/v3.0/fam_mem.php?family_id=bHLH
Ghir_A07G003670	WRKY	WRKY	-	http://plntfdb.bio.uni-potsdam.de/v3.0/fam_mem.php?family_id=WRKY
Ghir_D10G004220	Trihelix	trihelix	-	http://plntfdb.bio.uni-potsdam.de/v3.0/fam_mem.php?family_id=Trihelix
Ghir_D05G018190	NAC	NAM	-	http://plntfdb.bio.uni-potsdam.de/v3.0/fam_mem.php?family_id=NAC
Ghir_A06G008580	AP2-EREBP	AP2	-	http://plntfdb.bio.uni-potsdam.de/v3.0/fam_mem.php?family_id=AP2-EREBP
Ghir_A08G026250	C2C2-GATA	GATA	-	http://plntfdb.bio.uni-potsdam.de/v3.0/fam_mem.php?family_id=C2C2-GATA
Ghir_A02G001210	RWP-RK	RWP-RK	-	http://plntfdb.bio.uni-potsdam.de/v3.0/fam_mem.php?family_id=RWP-RK
Ghir_D11G019720	C2H2	zf-C2H2	PHD	http://plntfdb.bio.uni-potsdam.de/v3.0/fam_mem.php?family_id=C2H2
Ghir_D07G021870	bHLH	HLH	-	http://plntfdb.bio.uni-potsdam.de/v3.0/fam_mem.php?family_id=bHLH
Ghir_A07G010780.2	G2-like	G2-like	Response_reg	http://plntfdb.bio.uni-potsdam.de/v3.0/fam_mem.php?family_id=G2-like
Ghir_A03G020790	ABI3VP1	B3	AP2,Auxin_resp	http://plntfdb.bio.uni-potsdam.de/v3.0/fam_mem.php?family_id=ABI3VP1
Ghir_A10G021860	C2H2	zf-C2H2	PHD	http://plntfdb.bio.uni-potsdam.de/v3.0/fam_mem.php?family_id=C2H2
Ghir_A09G010460.2	NAC	NAM	-	http://plntfdb.bio.uni-potsdam.de/v3.0/fam_mem.php?family_id=NAC
Ghir_A04G009920.1	Trihelix	trihelix	-	http://plntfdb.bio.uni-potsdam.de/v3.0/fam_mem.php?family_id=Trihelix
Ghir_D11G010490	AP2-EREBP	AP2	-	http://plntfdb.bio.uni-potsdam.de/v3.0/fam_mem.php?family_id=AP2-EREBP
Ghir_A06G021650.1	C3H	zf-CCCH	PHD,SNF2_N,zf-C2H2	http://plntfdb.bio.uni-potsdam.de/v3.0/fam_mem.php?family_id=C3H
Ghir_A09G019780	RWP-RK	RWP-RK	-	http://plntfdb.bio.uni-potsdam.de/v3.0/fam_mem.php?family_id=RWP-RK
Ghir_D11G003890	C2C2-Dof	zf-Dof	-	http://plntfdb.bio.uni-potsdam.de/v3.0/fam_mem.php?family_id=C2C2-Dof
Ghir_D12G002020	C2H2	zf-C2H2	PHD	http://plntfdb.bio.uni-potsdam.de/v3.0/fam_mem.php?family_id=C2H2
Ghir_A13G023050	GRAS	GRAS	-	http://plntfdb.bio.uni-potsdam.de/v3.0/fam_mem.php?family_id=GRAS
Ghir_D01G002680	mTERF	mTERF	-	http://plntfdb.bio.uni-potsdam.de/v3.0/fam_mem.php?family_id=mTERF
BGI_novel_G006237	MYB	Myb_DNA-binding	ARID,Response_reg,SNF2_N	http://plntfdb.bio.uni-potsdam.de/v3.0/fam_mem.php?family_id=MYB
Ghir_D07G004670	NAC	NAM	-	http://plntfdb.bio.uni-potsdam.de/v3.0/fam_mem.php?family_id=NAC
Ghir_A11G018900	SRS	DUF702	-	http://plntfdb.bio.uni-potsdam.de/v3.0/fam_mem.php?family_id=SRS
Ghir_A11G015880.1	C3H	zf-CCCH	PHD,SNF2_N,zf-C2H2	http://plntfdb.bio.uni-potsdam.de/v3.0/fam_mem.php?family_id=C3H
Ghir_A11G013300	HSF	HSF_DNA-bind	-	http://plntfdb.bio.uni-potsdam.de/v3.0/fam_mem.php?family_id=HSF
Ghir_A12G013380	GRAS	GRAS	-	http://plntfdb.bio.uni-potsdam.de/v3.0/fam_mem.php?family_id=GRAS
Ghir_D08G012560	WRKY	WRKY	-	http://plntfdb.bio.uni-potsdam.de/v3.0/fam_mem.php?family_id=WRKY
Ghir_A06G010870.1	WRKY	WRKY	-	http://plntfdb.bio.uni-potsdam.de/v3.0/fam_mem.php?family_id=WRKY
Ghir_D11G005310	MYB	Myb_DNA-binding	ARID,Response_reg,SNF2_N	http://plntfdb.bio.uni-potsdam.de/v3.0/fam_mem.php?family_id=MYB
Ghir_D05G006200	WRKY	WRKY	-	http://plntfdb.bio.uni-potsdam.de/v3.0/fam_mem.php?family_id=WRKY
Ghir_D13G016920	WRKY	WRKY	-	http://plntfdb.bio.uni-potsdam.de/v3.0/fam_mem.php?family_id=WRKY
Ghir_A13G024170	C2H2	zf-C2H2	PHD	http://plntfdb.bio.uni-potsdam.de/v3.0/fam_mem.php?family_id=C2H2
BGI_novel_G007410	MADS	SRF-TF	-	http://plntfdb.bio.uni-potsdam.de/v3.0/fam_mem.php?family_id=MADS
Ghir_D02G016460	AP2-EREBP	AP2	-	http://plntfdb.bio.uni-potsdam.de/v3.0/fam_mem.php?family_id=AP2-EREBP
Ghir_A07G003840	C2C2-CO-like	CCT,zf-B_box	GATA,PLATZ	http://plntfdb.bio.uni-potsdam.de/v3.0/fam_mem.php?family_id=C2C2-CO-like
Ghir_D07G004980	AP2-EREBP	AP2	-	http://plntfdb.bio.uni-potsdam.de/v3.0/fam_mem.php?family_id=AP2-EREBP
Ghir_A12G018590.1	WRKY	WRKY	-	http://plntfdb.bio.uni-potsdam.de/v3.0/fam_mem.php?family_id=WRKY
Ghir_A01G000310	CSD	CSD	-	http://plntfdb.bio.uni-potsdam.de/v3.0/fam_mem.php?family_id=CSD
Ghir_A05G002380	HSF	HSF_DNA-bind	-	http://plntfdb.bio.uni-potsdam.de/v3.0/fam_mem.php?family_id=HSF
Ghir_A03G020090	bHLH	HLH	-	http://plntfdb.bio.uni-potsdam.de/v3.0/fam_mem.php?family_id=bHLH
Ghir_A13G023880	ABI3VP1	B3	AP2,Auxin_resp	http://plntfdb.bio.uni-potsdam.de/v3.0/fam_mem.php?family_id=ABI3VP1
Ghir_A05G020870	bHLH	HLH	-	http://plntfdb.bio.uni-potsdam.de/v3.0/fam_mem.php?family_id=bHLH
Ghir_D08G014690	LIM	LIM	-	http://plntfdb.bio.uni-potsdam.de/v3.0/fam_mem.php?family_id=LIM
Ghir_D02G013220	WRKY	WRKY	-	http://plntfdb.bio.uni-potsdam.de/v3.0/fam_mem.php?family_id=WRKY
Ghir_D13G002530	MYB	Myb_DNA-binding	ARID,Response_reg,SNF2_N	http://plntfdb.bio.uni-potsdam.de/v3.0/fam_mem.php?family_id=MYB
Ghir_D01G013750.1	SBP	SBP	-	http://plntfdb.bio.uni-potsdam.de/v3.0/fam_mem.php?family_id=SBP
Ghir_A12G023920	HSF	HSF_DNA-bind	-	http://plntfdb.bio.uni-potsdam.de/v3.0/fam_mem.php?family_id=HSF
Ghir_D06G005810	C2C2-YABBY	YABBY	-	http://plntfdb.bio.uni-potsdam.de/v3.0/fam_mem.php?family_id=C2C2-YABBY
Ghir_A06G003030.5	C2C2-GATA	GATA	-	http://plntfdb.bio.uni-potsdam.de/v3.0/fam_mem.php?family_id=C2C2-GATA
Ghir_D07G002180	Alfin-like	Alfin-like	DDT,Homeobox,JmjC,JmjN	http://plntfdb.bio.uni-potsdam.de/v3.0/fam_mem.php?family_id=Alfin-like
Ghir_D05G025730	AP2-EREBP	AP2	-	http://plntfdb.bio.uni-potsdam.de/v3.0/fam_mem.php?family_id=AP2-EREBP
Ghir_D09G020780	AP2-EREBP	AP2	-	http://plntfdb.bio.uni-potsdam.de/v3.0/fam_mem.php?family_id=AP2-EREBP
Ghir_A08G001710	ABI3VP1	B3	AP2,Auxin_resp	http://plntfdb.bio.uni-potsdam.de/v3.0/fam_mem.php?family_id=ABI3VP1
Ghir_A09G018100	NAC	NAM	-	http://plntfdb.bio.uni-potsdam.de/v3.0/fam_mem.php?family_id=NAC
Ghir_D09G003410	FAR1	FAR1	-	http://plntfdb.bio.uni-potsdam.de/v3.0/fam_mem.php?family_id=FAR1
Ghir_A08G004590	AP2-EREBP	AP2	-	http://plntfdb.bio.uni-potsdam.de/v3.0/fam_mem.php?family_id=AP2-EREBP
Ghir_D09G012080	FHA	FHA	-	http://plntfdb.bio.uni-potsdam.de/v3.0/fam_mem.php?family_id=FHA
Ghir_A08G019760	WRKY	WRKY	-	http://plntfdb.bio.uni-potsdam.de/v3.0/fam_mem.php?family_id=WRKY
Ghir_A03G010220.5	FAR1	FAR1	-	http://plntfdb.bio.uni-potsdam.de/v3.0/fam_mem.php?family_id=FAR1
Ghir_A11G014840	AP2-EREBP	AP2	-	http://plntfdb.bio.uni-potsdam.de/v3.0/fam_mem.php?family_id=AP2-EREBP
Ghir_D13G019750	MADS	SRF-TF	-	http://plntfdb.bio.uni-potsdam.de/v3.0/fam_mem.php?family_id=MADS
Ghir_D05G003250	bHLH	HLH	-	http://plntfdb.bio.uni-potsdam.de/v3.0/fam_mem.php?family_id=bHLH
Ghir_D10G002510.1	ABI3VP1	B3	AP2,Auxin_resp	http://plntfdb.bio.uni-potsdam.de/v3.0/fam_mem.php?family_id=ABI3VP1
Ghir_D07G000810	AP2-EREBP	AP2	-	http://plntfdb.bio.uni-potsdam.de/v3.0/fam_mem.php?family_id=AP2-EREBP
Ghir_D13G006110.1	MYB	Myb_DNA-binding	ARID,Response_reg,SNF2_N	http://plntfdb.bio.uni-potsdam.de/v3.0/fam_mem.php?family_id=MYB
Ghir_D03G019280	MYB	Myb_DNA-binding	ARID,Response_reg,SNF2_N	http://plntfdb.bio.uni-potsdam.de/v3.0/fam_mem.php?family_id=MYB
Ghir_D09G008240	Tify	tify	GATA	http://plntfdb.bio.uni-potsdam.de/v3.0/fam_mem.php?family_id=Tify
Ghir_A10G001370	bHLH	HLH	-	http://plntfdb.bio.uni-potsdam.de/v3.0/fam_mem.php?family_id=bHLH
Ghir_D01G012140	bZIP	bZIP_1,bZIP_2,bZIP_Maf	HLH	http://plntfdb.bio.uni-potsdam.de/v3.0/fam_mem.php?family_id=bZIP
Ghir_A13G015420	NAC	NAM	-	http://plntfdb.bio.uni-potsdam.de/v3.0/fam_mem.php?family_id=NAC
Ghir_A01G012340	C2H2	zf-C2H2	PHD	http://plntfdb.bio.uni-potsdam.de/v3.0/fam_mem.php?family_id=C2H2
Ghir_D11G001280.1	MYB	Myb_DNA-binding	ARID,Response_reg,SNF2_N	http://plntfdb.bio.uni-potsdam.de/v3.0/fam_mem.php?family_id=MYB
Ghir_D05G001370	HB	Homeobox,KNOX1,KNOX2	-	http://plntfdb.bio.uni-potsdam.de/v3.0/fam_mem.php?family_id=HB
Ghir_A13G021190	C3H	zf-CCCH	PHD,SNF2_N,zf-C2H2	http://plntfdb.bio.uni-potsdam.de/v3.0/fam_mem.php?family_id=C3H
Ghir_A03G013080	ABI3VP1	B3	AP2,Auxin_resp	http://plntfdb.bio.uni-potsdam.de/v3.0/fam_mem.php?family_id=ABI3VP1
Ghir_A12G006670	GRAS	GRAS	-	http://plntfdb.bio.uni-potsdam.de/v3.0/fam_mem.php?family_id=GRAS
Ghir_D06G001870	WRKY	WRKY	-	http://plntfdb.bio.uni-potsdam.de/v3.0/fam_mem.php?family_id=WRKY
Ghir_D12G004380	ABI3VP1	B3	AP2,Auxin_resp	http://plntfdb.bio.uni-potsdam.de/v3.0/fam_mem.php?family_id=ABI3VP1
Ghir_A10G024300	G2-like	G2-like	Response_reg	http://plntfdb.bio.uni-potsdam.de/v3.0/fam_mem.php?family_id=G2-like
Ghir_D08G022860	bHLH	HLH	-	http://plntfdb.bio.uni-potsdam.de/v3.0/fam_mem.php?family_id=bHLH
Ghir_D02G019650	TCP	TCP	-	http://plntfdb.bio.uni-potsdam.de/v3.0/fam_mem.php?family_id=TCP
Ghir_A07G006750	MYB	Myb_DNA-binding	ARID,Response_reg,SNF2_N	http://plntfdb.bio.uni-potsdam.de/v3.0/fam_mem.php?family_id=MYB
Ghir_A04G015830	MADS	SRF-TF	-	http://plntfdb.bio.uni-potsdam.de/v3.0/fam_mem.php?family_id=MADS
Ghir_A04G011440	MYB	Myb_DNA-binding	ARID,Response_reg,SNF2_N	http://plntfdb.bio.uni-potsdam.de/v3.0/fam_mem.php?family_id=MYB
Ghir_D07G006000	C2H2	zf-C2H2	PHD	http://plntfdb.bio.uni-potsdam.de/v3.0/fam_mem.php?family_id=C2H2
Ghir_A03G022180.1	CSD	CSD	-	http://plntfdb.bio.uni-potsdam.de/v3.0/fam_mem.php?family_id=CSD
Ghir_D07G019980.1	FAR1	FAR1	-	http://plntfdb.bio.uni-potsdam.de/v3.0/fam_mem.php?family_id=FAR1
Ghir_A03G001060	C2C2-GATA	GATA	-	http://plntfdb.bio.uni-potsdam.de/v3.0/fam_mem.php?family_id=C2C2-GATA
Ghir_A11G027870	G2-like	G2-like	Response_reg	http://plntfdb.bio.uni-potsdam.de/v3.0/fam_mem.php?family_id=G2-like
Ghir_D04G004080	MADS	SRF-TF	-	http://plntfdb.bio.uni-potsdam.de/v3.0/fam_mem.php?family_id=MADS
Ghir_D11G022510	zf-HD	ZF-HD_dimer	-	http://plntfdb.bio.uni-potsdam.de/v3.0/fam_mem.php?family_id=zf-HD
Ghir_D07G004570	bHLH	HLH	-	http://plntfdb.bio.uni-potsdam.de/v3.0/fam_mem.php?family_id=bHLH
BGI_novel_G003407	AP2-EREBP	AP2	-	http://plntfdb.bio.uni-potsdam.de/v3.0/fam_mem.php?family_id=AP2-EREBP
Ghir_A07G015710	C2H2	zf-C2H2	PHD	http://plntfdb.bio.uni-potsdam.de/v3.0/fam_mem.php?family_id=C2H2
Ghir_A08G024510	NAC	NAM	-	http://plntfdb.bio.uni-potsdam.de/v3.0/fam_mem.php?family_id=NAC
Ghir_A13G023900	ABI3VP1	B3	AP2,Auxin_resp	http://plntfdb.bio.uni-potsdam.de/v3.0/fam_mem.php?family_id=ABI3VP1
Ghir_D07G001330	MYB	Myb_DNA-binding	ARID,Response_reg,SNF2_N	http://plntfdb.bio.uni-potsdam.de/v3.0/fam_mem.php?family_id=MYB
Ghir_A07G005570	WRKY	WRKY	-	http://plntfdb.bio.uni-potsdam.de/v3.0/fam_mem.php?family_id=WRKY
Ghir_A10G017930	MYB	Myb_DNA-binding	ARID,Response_reg,SNF2_N	http://plntfdb.bio.uni-potsdam.de/v3.0/fam_mem.php?family_id=MYB
Ghir_A12G017290	C2H2	zf-C2H2	PHD	http://plntfdb.bio.uni-potsdam.de/v3.0/fam_mem.php?family_id=C2H2
Ghir_D01G012370	bHLH	HLH	-	http://plntfdb.bio.uni-potsdam.de/v3.0/fam_mem.php?family_id=bHLH
Ghir_A11G018730	NAC	NAM	-	http://plntfdb.bio.uni-potsdam.de/v3.0/fam_mem.php?family_id=NAC
Ghir_D06G011890	bZIP	bZIP_1,bZIP_2,bZIP_Maf	HLH	http://plntfdb.bio.uni-potsdam.de/v3.0/fam_mem.php?family_id=bZIP
Ghir_A08G023490	ABI3VP1	B3	AP2,Auxin_resp	http://plntfdb.bio.uni-potsdam.de/v3.0/fam_mem.php?family_id=ABI3VP1
Ghir_D02G018810	AP2-EREBP	AP2	-	http://plntfdb.bio.uni-potsdam.de/v3.0/fam_mem.php?family_id=AP2-EREBP
Ghir_A05G007050.2	bHLH	HLH	-	http://plntfdb.bio.uni-potsdam.de/v3.0/fam_mem.php?family_id=bHLH
Ghir_A05G017990	GRAS	GRAS	-	http://plntfdb.bio.uni-potsdam.de/v3.0/fam_mem.php?family_id=GRAS
Ghir_D13G003010	C3H	zf-CCCH	PHD,SNF2_N,zf-C2H2	http://plntfdb.bio.uni-potsdam.de/v3.0/fam_mem.php?family_id=C3H
Ghir_D05G011980	LOB	DUF260	-	http://plntfdb.bio.uni-potsdam.de/v3.0/fam_mem.php?family_id=LOB
Ghir_D01G018430	WRKY	WRKY	-	http://plntfdb.bio.uni-potsdam.de/v3.0/fam_mem.php?family_id=WRKY
Ghir_A12G000250	C2H2	zf-C2H2	PHD	http://plntfdb.bio.uni-potsdam.de/v3.0/fam_mem.php?family_id=C2H2
Ghir_A07G015870.1	MYB	Myb_DNA-binding	ARID,Response_reg,SNF2_N	http://plntfdb.bio.uni-potsdam.de/v3.0/fam_mem.php?family_id=MYB
Ghir_D06G015980	LOB	DUF260	-	http://plntfdb.bio.uni-potsdam.de/v3.0/fam_mem.php?family_id=LOB
Ghir_A10G007880	CPP	TCR	-	http://plntfdb.bio.uni-potsdam.de/v3.0/fam_mem.php?family_id=CPP
Ghir_D09G010970.1	ARF	Auxin_resp	-	http://plntfdb.bio.uni-potsdam.de/v3.0/fam_mem.php?family_id=ARF
Ghir_D11G019490	zf-HD	ZF-HD_dimer	-	http://plntfdb.bio.uni-potsdam.de/v3.0/fam_mem.php?family_id=zf-HD
Ghir_D01G018350	RWP-RK	RWP-RK	-	http://plntfdb.bio.uni-potsdam.de/v3.0/fam_mem.php?family_id=RWP-RK
Ghir_D08G028040	MADS	SRF-TF	-	http://plntfdb.bio.uni-potsdam.de/v3.0/fam_mem.php?family_id=MADS
Ghir_D07G006650.1	G2-like	G2-like	Response_reg	http://plntfdb.bio.uni-potsdam.de/v3.0/fam_mem.php?family_id=G2-like
Ghir_A06G002270	LOB	DUF260	-	http://plntfdb.bio.uni-potsdam.de/v3.0/fam_mem.php?family_id=LOB
Ghir_A13G018530	bHLH	HLH	-	http://plntfdb.bio.uni-potsdam.de/v3.0/fam_mem.php?family_id=bHLH
Ghir_A09G023350	HSF	HSF_DNA-bind	-	http://plntfdb.bio.uni-potsdam.de/v3.0/fam_mem.php?family_id=HSF
Ghir_D07G023890	MYB	Myb_DNA-binding	ARID,Response_reg,SNF2_N	http://plntfdb.bio.uni-potsdam.de/v3.0/fam_mem.php?family_id=MYB
Ghir_D08G012500	AP2-EREBP	AP2	-	http://plntfdb.bio.uni-potsdam.de/v3.0/fam_mem.php?family_id=AP2-EREBP
Ghir_D13G011940	MYB	Myb_DNA-binding	ARID,Response_reg,SNF2_N	http://plntfdb.bio.uni-potsdam.de/v3.0/fam_mem.php?family_id=MYB
Ghir_A08G024430	MYB	Myb_DNA-binding	ARID,Response_reg,SNF2_N	http://plntfdb.bio.uni-potsdam.de/v3.0/fam_mem.php?family_id=MYB
Ghir_D01G006680	GRAS	GRAS	-	http://plntfdb.bio.uni-potsdam.de/v3.0/fam_mem.php?family_id=GRAS
Ghir_A05G003630	ARF	Auxin_resp	-	http://plntfdb.bio.uni-potsdam.de/v3.0/fam_mem.php?family_id=ARF
Ghir_A13G002540	PLATZ	PLATZ	-	http://plntfdb.bio.uni-potsdam.de/v3.0/fam_mem.php?family_id=PLATZ
Ghir_D11G008980.2	MADS	SRF-TF	-	http://plntfdb.bio.uni-potsdam.de/v3.0/fam_mem.php?family_id=MADS
Ghir_A03G004010.1	ARF	Auxin_resp	-	http://plntfdb.bio.uni-potsdam.de/v3.0/fam_mem.php?family_id=ARF
Ghir_A10G010240	TUB	Tub	-	http://plntfdb.bio.uni-potsdam.de/v3.0/fam_mem.php?family_id=TUB
Ghir_A06G005750	C2C2-YABBY	YABBY	-	http://plntfdb.bio.uni-potsdam.de/v3.0/fam_mem.php?family_id=C2C2-YABBY
Ghir_A05G041640	WRKY	WRKY	-	http://plntfdb.bio.uni-potsdam.de/v3.0/fam_mem.php?family_id=WRKY
Ghir_D02G017450.1	bHLH	HLH	-	http://plntfdb.bio.uni-potsdam.de/v3.0/fam_mem.php?family_id=bHLH
Ghir_A12G020310.1	MYB	Myb_DNA-binding	ARID,Response_reg,SNF2_N	http://plntfdb.bio.uni-potsdam.de/v3.0/fam_mem.php?family_id=MYB
Ghir_A07G006640	G2-like	G2-like	Response_reg	http://plntfdb.bio.uni-potsdam.de/v3.0/fam_mem.php?family_id=G2-like
Ghir_A11G028490	bHLH	HLH	-	http://plntfdb.bio.uni-potsdam.de/v3.0/fam_mem.php?family_id=bHLH
Ghir_A11G003500	bHLH	HLH	-	http://plntfdb.bio.uni-potsdam.de/v3.0/fam_mem.php?family_id=bHLH
Ghir_A01G019080	G2-like	G2-like	Response_reg	http://plntfdb.bio.uni-potsdam.de/v3.0/fam_mem.php?family_id=G2-like
Ghir_A05G038680	zf-HD	ZF-HD_dimer	-	http://plntfdb.bio.uni-potsdam.de/v3.0/fam_mem.php?family_id=zf-HD
Ghir_D12G007490	ARF	Auxin_resp	-	http://plntfdb.bio.uni-potsdam.de/v3.0/fam_mem.php?family_id=ARF
Ghir_D05G019710	zf-HD	ZF-HD_dimer	-	http://plntfdb.bio.uni-potsdam.de/v3.0/fam_mem.php?family_id=zf-HD
Ghir_D07G002110	MYB	Myb_DNA-binding	ARID,Response_reg,SNF2_N	http://plntfdb.bio.uni-potsdam.de/v3.0/fam_mem.php?family_id=MYB
Ghir_A06G008810	MYB	Myb_DNA-binding	ARID,Response_reg,SNF2_N	http://plntfdb.bio.uni-potsdam.de/v3.0/fam_mem.php?family_id=MYB
Ghir_A11G010520.1	ARF	Auxin_resp	-	http://plntfdb.bio.uni-potsdam.de/v3.0/fam_mem.php?family_id=ARF
Ghir_D13G013920	NAC	NAM	-	http://plntfdb.bio.uni-potsdam.de/v3.0/fam_mem.php?family_id=NAC
Ghir_A03G004200.1	EIL	EIN3	-	http://plntfdb.bio.uni-potsdam.de/v3.0/fam_mem.php?family_id=EIL
Ghir_D13G016300	mTERF	mTERF	-	http://plntfdb.bio.uni-potsdam.de/v3.0/fam_mem.php?family_id=mTERF
Ghir_D08G017200	MYB	Myb_DNA-binding	ARID,Response_reg,SNF2_N	http://plntfdb.bio.uni-potsdam.de/v3.0/fam_mem.php?family_id=MYB
Ghir_D02G011680	C3H	zf-CCCH	PHD,SNF2_N,zf-C2H2	http://plntfdb.bio.uni-potsdam.de/v3.0/fam_mem.php?family_id=C3H
Ghir_D03G010030	LOB	DUF260	-	http://plntfdb.bio.uni-potsdam.de/v3.0/fam_mem.php?family_id=LOB
Ghir_D09G018660	AP2-EREBP	AP2	-	http://plntfdb.bio.uni-potsdam.de/v3.0/fam_mem.php?family_id=AP2-EREBP
Ghir_A10G007880.1	CPP	TCR	-	http://plntfdb.bio.uni-potsdam.de/v3.0/fam_mem.php?family_id=CPP
Ghir_A07G014020	MYB	Myb_DNA-binding	ARID,Response_reg,SNF2_N	http://plntfdb.bio.uni-potsdam.de/v3.0/fam_mem.php?family_id=MYB
Ghir_A12G015120	AP2-EREBP	AP2	-	http://plntfdb.bio.uni-potsdam.de/v3.0/fam_mem.php?family_id=AP2-EREBP
Ghir_A01G001630	MYB	Myb_DNA-binding	ARID,Response_reg,SNF2_N	http://plntfdb.bio.uni-potsdam.de/v3.0/fam_mem.php?family_id=MYB
Ghir_D06G017180	HB	Homeobox,KNOX1,KNOX2	-	http://plntfdb.bio.uni-potsdam.de/v3.0/fam_mem.php?family_id=HB
Ghir_D05G003160	MYB	Myb_DNA-binding	ARID,Response_reg,SNF2_N	http://plntfdb.bio.uni-potsdam.de/v3.0/fam_mem.php?family_id=MYB
Ghir_A07G003480	HB	Homeobox,KNOX1,KNOX2	-	http://plntfdb.bio.uni-potsdam.de/v3.0/fam_mem.php?family_id=HB
Ghir_D03G001970	ABI3VP1	B3	AP2,Auxin_resp	http://plntfdb.bio.uni-potsdam.de/v3.0/fam_mem.php?family_id=ABI3VP1
Ghir_D06G008190	MYB	Myb_DNA-binding	ARID,Response_reg,SNF2_N	http://plntfdb.bio.uni-potsdam.de/v3.0/fam_mem.php?family_id=MYB
Ghir_A03G001430	GRAS	GRAS	-	http://plntfdb.bio.uni-potsdam.de/v3.0/fam_mem.php?family_id=GRAS
Ghir_A11G033860	AP2-EREBP	AP2	-	http://plntfdb.bio.uni-potsdam.de/v3.0/fam_mem.php?family_id=AP2-EREBP
Ghir_A03G011490	MYB	Myb_DNA-binding	ARID,Response_reg,SNF2_N	http://plntfdb.bio.uni-potsdam.de/v3.0/fam_mem.php?family_id=MYB
Ghir_D05G026790	GRF	QLQ,WRC	-	http://plntfdb.bio.uni-potsdam.de/v3.0/fam_mem.php?family_id=GRF
Ghir_D05G016320	C3H	zf-CCCH	PHD,SNF2_N,zf-C2H2	http://plntfdb.bio.uni-potsdam.de/v3.0/fam_mem.php?family_id=C3H
Ghir_A05G016730	C2C2-Dof	zf-Dof	-	http://plntfdb.bio.uni-potsdam.de/v3.0/fam_mem.php?family_id=C2C2-Dof
Ghir_A03G017060	AP2-EREBP	AP2	-	http://plntfdb.bio.uni-potsdam.de/v3.0/fam_mem.php?family_id=AP2-EREBP
Ghir_D12G012440	C2C2-Dof	zf-Dof	-	http://plntfdb.bio.uni-potsdam.de/v3.0/fam_mem.php?family_id=C2C2-Dof
Ghir_A02G004850	AP2-EREBP	AP2	-	http://plntfdb.bio.uni-potsdam.de/v3.0/fam_mem.php?family_id=AP2-EREBP
Ghir_D02G009280	HSF	HSF_DNA-bind	-	http://plntfdb.bio.uni-potsdam.de/v3.0/fam_mem.php?family_id=HSF
Ghir_D07G025150	C2C2-CO-like	CCT,zf-B_box	GATA,PLATZ	http://plntfdb.bio.uni-potsdam.de/v3.0/fam_mem.php?family_id=C2C2-CO-like
Ghir_A06G003030	C2C2-GATA	GATA	-	http://plntfdb.bio.uni-potsdam.de/v3.0/fam_mem.php?family_id=C2C2-GATA
Ghir_A03G021060	ABI3VP1	B3	AP2,Auxin_resp	http://plntfdb.bio.uni-potsdam.de/v3.0/fam_mem.php?family_id=ABI3VP1
Ghir_A01G002010.2	G2-like	G2-like	Response_reg	http://plntfdb.bio.uni-potsdam.de/v3.0/fam_mem.php?family_id=G2-like
Ghir_D05G020330	C2C2-Dof	zf-Dof	-	http://plntfdb.bio.uni-potsdam.de/v3.0/fam_mem.php?family_id=C2C2-Dof
Ghir_A03G020730	AP2-EREBP	AP2	-	http://plntfdb.bio.uni-potsdam.de/v3.0/fam_mem.php?family_id=AP2-EREBP
Ghir_D10G026770.1	LOB	DUF260	-	http://plntfdb.bio.uni-potsdam.de/v3.0/fam_mem.php?family_id=LOB
Ghir_D13G011270	NAC	NAM	-	http://plntfdb.bio.uni-potsdam.de/v3.0/fam_mem.php?family_id=NAC
Ghir_D10G027090	mTERF	mTERF	-	http://plntfdb.bio.uni-potsdam.de/v3.0/fam_mem.php?family_id=mTERF
Ghir_D07G009450	C3H	zf-CCCH	PHD,SNF2_N,zf-C2H2	http://plntfdb.bio.uni-potsdam.de/v3.0/fam_mem.php?family_id=C3H
Ghir_D05G005050	AP2-EREBP	AP2	-	http://plntfdb.bio.uni-potsdam.de/v3.0/fam_mem.php?family_id=AP2-EREBP
BGI_novel_G006582	NAC	NAM	-	http://plntfdb.bio.uni-potsdam.de/v3.0/fam_mem.php?family_id=NAC
Ghir_A11G027280	AP2-EREBP	AP2	-	http://plntfdb.bio.uni-potsdam.de/v3.0/fam_mem.php?family_id=AP2-EREBP
Ghir_D02G005060	TUB	Tub	-	http://plntfdb.bio.uni-potsdam.de/v3.0/fam_mem.php?family_id=TUB
Ghir_A12G018130	bHLH	HLH	-	http://plntfdb.bio.uni-potsdam.de/v3.0/fam_mem.php?family_id=bHLH
Ghir_D12G027510	C3H	zf-CCCH	PHD,SNF2_N,zf-C2H2	http://plntfdb.bio.uni-potsdam.de/v3.0/fam_mem.php?family_id=C3H
Ghir_A07G013160	MYB	Myb_DNA-binding	ARID,Response_reg,SNF2_N	http://plntfdb.bio.uni-potsdam.de/v3.0/fam_mem.php?family_id=MYB
Ghir_A05G004860	C2C2-GATA	GATA	-	http://plntfdb.bio.uni-potsdam.de/v3.0/fam_mem.php?family_id=C2C2-GATA
Ghir_D05G026390	OFP	Ovate	-	http://plntfdb.bio.uni-potsdam.de/v3.0/fam_mem.php?family_id=OFP
Ghir_D01G003210	NAC	NAM	-	http://plntfdb.bio.uni-potsdam.de/v3.0/fam_mem.php?family_id=NAC
Ghir_A08G006560	LOB	DUF260	-	http://plntfdb.bio.uni-potsdam.de/v3.0/fam_mem.php?family_id=LOB
Ghir_D07G012950	SRS	DUF702	-	http://plntfdb.bio.uni-potsdam.de/v3.0/fam_mem.php?family_id=SRS
Ghir_A12G028560	MYB	Myb_DNA-binding	ARID,Response_reg,SNF2_N	http://plntfdb.bio.uni-potsdam.de/v3.0/fam_mem.php?family_id=MYB
Ghir_A08G021220	LOB	DUF260	-	http://plntfdb.bio.uni-potsdam.de/v3.0/fam_mem.php?family_id=LOB
Ghir_D02G018970.2	ULT	ULT	-	http://plntfdb.bio.uni-potsdam.de/v3.0/fam_mem.php?family_id=ULT
Ghir_A12G028930	LIM	LIM	-	http://plntfdb.bio.uni-potsdam.de/v3.0/fam_mem.php?family_id=LIM
Ghir_D03G018040	AP2-EREBP	AP2	-	http://plntfdb.bio.uni-potsdam.de/v3.0/fam_mem.php?family_id=AP2-EREBP
Ghir_D03G001600	C2H2	zf-C2H2	PHD	http://plntfdb.bio.uni-potsdam.de/v3.0/fam_mem.php?family_id=C2H2
Ghir_A06G013890	C2C2-Dof	zf-Dof	-	http://plntfdb.bio.uni-potsdam.de/v3.0/fam_mem.php?family_id=C2C2-Dof
Ghir_A11G005550	bHLH	HLH	-	http://plntfdb.bio.uni-potsdam.de/v3.0/fam_mem.php?family_id=bHLH
Ghir_D13G023680	GRAS	GRAS	-	http://plntfdb.bio.uni-potsdam.de/v3.0/fam_mem.php?family_id=GRAS
Ghir_A04G015860	WRKY	WRKY	-	http://plntfdb.bio.uni-potsdam.de/v3.0/fam_mem.php?family_id=WRKY
Ghir_D09G002330	WRKY	WRKY	-	http://plntfdb.bio.uni-potsdam.de/v3.0/fam_mem.php?family_id=WRKY
Ghir_D11G024930	MYB	Myb_DNA-binding	ARID,Response_reg,SNF2_N	http://plntfdb.bio.uni-potsdam.de/v3.0/fam_mem.php?family_id=MYB
Ghir_A07G009320	C3H	zf-CCCH	PHD,SNF2_N,zf-C2H2	http://plntfdb.bio.uni-potsdam.de/v3.0/fam_mem.php?family_id=C3H
Ghir_A06G010070	MYB	Myb_DNA-binding	ARID,Response_reg,SNF2_N	http://plntfdb.bio.uni-potsdam.de/v3.0/fam_mem.php?family_id=MYB
Ghir_D03G010570	C2H2	zf-C2H2	PHD	http://plntfdb.bio.uni-potsdam.de/v3.0/fam_mem.php?family_id=C2H2
Ghir_D08G015490	AP2-EREBP	AP2	-	http://plntfdb.bio.uni-potsdam.de/v3.0/fam_mem.php?family_id=AP2-EREBP
Ghir_A11G021800	C2C2-Dof	zf-Dof	-	http://plntfdb.bio.uni-potsdam.de/v3.0/fam_mem.php?family_id=C2C2-Dof
Ghir_A11G010990	MYB	Myb_DNA-binding	ARID,Response_reg,SNF2_N	http://plntfdb.bio.uni-potsdam.de/v3.0/fam_mem.php?family_id=MYB
Ghir_A12G015270	C3H	zf-CCCH	PHD,SNF2_N,zf-C2H2	http://plntfdb.bio.uni-potsdam.de/v3.0/fam_mem.php?family_id=C3H
Ghir_A05G004690.1	C3H	zf-CCCH	PHD,SNF2_N,zf-C2H2	http://plntfdb.bio.uni-potsdam.de/v3.0/fam_mem.php?family_id=C3H
Ghir_D07G024830	WRKY	WRKY	-	http://plntfdb.bio.uni-potsdam.de/v3.0/fam_mem.php?family_id=WRKY
Ghir_A13G009020	BBR/BPC	GAGA_bind	-	http://plntfdb.bio.uni-potsdam.de/v3.0/fam_mem.php?family_id=BBR/BPC
Ghir_A09G021400	G2-like	G2-like	Response_reg	http://plntfdb.bio.uni-potsdam.de/v3.0/fam_mem.php?family_id=G2-like
Ghir_A04G007630	PLATZ	PLATZ	-	http://plntfdb.bio.uni-potsdam.de/v3.0/fam_mem.php?family_id=PLATZ
Ghir_A03G008370	MADS	SRF-TF	-	http://plntfdb.bio.uni-potsdam.de/v3.0/fam_mem.php?family_id=MADS
Ghir_D05G016400	ABI3VP1	B3	AP2,Auxin_resp	http://plntfdb.bio.uni-potsdam.de/v3.0/fam_mem.php?family_id=ABI3VP1
Ghir_D11G010920.2	MYB	Myb_DNA-binding	ARID,Response_reg,SNF2_N	http://plntfdb.bio.uni-potsdam.de/v3.0/fam_mem.php?family_id=MYB
Ghir_A05G011520	WRKY	WRKY	-	http://plntfdb.bio.uni-potsdam.de/v3.0/fam_mem.php?family_id=WRKY
Ghir_A13G007610	MADS	SRF-TF	-	http://plntfdb.bio.uni-potsdam.de/v3.0/fam_mem.php?family_id=MADS
Ghir_A09G008080	AP2-EREBP	AP2	-	http://plntfdb.bio.uni-potsdam.de/v3.0/fam_mem.php?family_id=AP2-EREBP
Ghir_D08G026620.1	HRT	HRT	-	http://plntfdb.bio.uni-potsdam.de/v3.0/fam_mem.php?family_id=HRT
Ghir_D11G036170	GRAS	GRAS	-	http://plntfdb.bio.uni-potsdam.de/v3.0/fam_mem.php?family_id=GRAS
Ghir_A13G019360	ARR-B	G2-like,Myb_DNA-binding,Response_reg	CCT	http://plntfdb.bio.uni-potsdam.de/v3.0/fam_mem.php?family_id=ARR-B
Ghir_D01G005130	TCP	TCP	-	http://plntfdb.bio.uni-potsdam.de/v3.0/fam_mem.php?family_id=TCP
Ghir_D11G008770	LOB	DUF260	-	http://plntfdb.bio.uni-potsdam.de/v3.0/fam_mem.php?family_id=LOB
Ghir_A03G009330	bZIP	bZIP_1,bZIP_2,bZIP_Maf	HLH	http://plntfdb.bio.uni-potsdam.de/v3.0/fam_mem.php?family_id=bZIP
Ghir_A09G013630	MYB	Myb_DNA-binding	ARID,Response_reg,SNF2_N	http://plntfdb.bio.uni-potsdam.de/v3.0/fam_mem.php?family_id=MYB
Ghir_A07G024770	ABI3VP1	B3	AP2,Auxin_resp	http://plntfdb.bio.uni-potsdam.de/v3.0/fam_mem.php?family_id=ABI3VP1
Ghir_D12G017690	NAC	NAM	-	http://plntfdb.bio.uni-potsdam.de/v3.0/fam_mem.php?family_id=NAC
Ghir_D13G008420.4	WRKY	WRKY	-	http://plntfdb.bio.uni-potsdam.de/v3.0/fam_mem.php?family_id=WRKY
Ghir_A12G011220	AP2-EREBP	AP2	-	http://plntfdb.bio.uni-potsdam.de/v3.0/fam_mem.php?family_id=AP2-EREBP
Ghir_A06G014480	ARF	Auxin_resp	-	http://plntfdb.bio.uni-potsdam.de/v3.0/fam_mem.php?family_id=ARF
Ghir_A05G022740	bHLH	HLH	-	http://plntfdb.bio.uni-potsdam.de/v3.0/fam_mem.php?family_id=bHLH
Ghir_D07G024850	TCP	TCP	-	http://plntfdb.bio.uni-potsdam.de/v3.0/fam_mem.php?family_id=TCP
Ghir_A12G004430	ABI3VP1	B3	AP2,Auxin_resp	http://plntfdb.bio.uni-potsdam.de/v3.0/fam_mem.php?family_id=ABI3VP1
Ghir_D07G002530	mTERF	mTERF	-	http://plntfdb.bio.uni-potsdam.de/v3.0/fam_mem.php?family_id=mTERF
Ghir_D05G032600	bHLH	HLH	-	http://plntfdb.bio.uni-potsdam.de/v3.0/fam_mem.php?family_id=bHLH
Ghir_A07G006750.5	MYB	Myb_DNA-binding	ARID,Response_reg,SNF2_N	http://plntfdb.bio.uni-potsdam.de/v3.0/fam_mem.php?family_id=MYB
Ghir_D07G007660	bHLH	HLH	-	http://plntfdb.bio.uni-potsdam.de/v3.0/fam_mem.php?family_id=bHLH
Ghir_A02G015050	WRKY	WRKY	-	http://plntfdb.bio.uni-potsdam.de/v3.0/fam_mem.php?family_id=WRKY
Ghir_A13G015370	AP2-EREBP	AP2	-	http://plntfdb.bio.uni-potsdam.de/v3.0/fam_mem.php?family_id=AP2-EREBP
Ghir_A10G009310	GRAS	GRAS	-	http://plntfdb.bio.uni-potsdam.de/v3.0/fam_mem.php?family_id=GRAS
Ghir_D12G009540	AP2-EREBP	AP2	-	http://plntfdb.bio.uni-potsdam.de/v3.0/fam_mem.php?family_id=AP2-EREBP
Ghir_D10G004970	mTERF	mTERF	-	http://plntfdb.bio.uni-potsdam.de/v3.0/fam_mem.php?family_id=mTERF
Ghir_D08G013160	mTERF	mTERF	-	http://plntfdb.bio.uni-potsdam.de/v3.0/fam_mem.php?family_id=mTERF
Ghir_D05G028330	WRKY	WRKY	-	http://plntfdb.bio.uni-potsdam.de/v3.0/fam_mem.php?family_id=WRKY
Ghir_D11G003630	NAC	NAM	-	http://plntfdb.bio.uni-potsdam.de/v3.0/fam_mem.php?family_id=NAC
Ghir_D04G004930	WRKY	WRKY	-	http://plntfdb.bio.uni-potsdam.de/v3.0/fam_mem.php?family_id=WRKY
Ghir_D08G013510	WRKY	WRKY	-	http://plntfdb.bio.uni-potsdam.de/v3.0/fam_mem.php?family_id=WRKY
Ghir_A07G012170	BSD	BSD	-	http://plntfdb.bio.uni-potsdam.de/v3.0/fam_mem.php?family_id=BSD
Ghir_D05G030270	C2C2-GATA	GATA	-	http://plntfdb.bio.uni-potsdam.de/v3.0/fam_mem.php?family_id=C2C2-GATA
Ghir_D07G007460	TCP	TCP	-	http://plntfdb.bio.uni-potsdam.de/v3.0/fam_mem.php?family_id=TCP
Ghir_D02G001240	NAC	NAM	-	http://plntfdb.bio.uni-potsdam.de/v3.0/fam_mem.php?family_id=NAC
Ghir_A02G005980.1	SBP	SBP	-	http://plntfdb.bio.uni-potsdam.de/v3.0/fam_mem.php?family_id=SBP
Ghir_D08G016160	MYB	Myb_DNA-binding	ARID,Response_reg,SNF2_N	http://plntfdb.bio.uni-potsdam.de/v3.0/fam_mem.php?family_id=MYB
Ghir_A06G007690	bHLH	HLH	-	http://plntfdb.bio.uni-potsdam.de/v3.0/fam_mem.php?family_id=bHLH
Ghir_A13G001150	GRAS	GRAS	-	http://plntfdb.bio.uni-potsdam.de/v3.0/fam_mem.php?family_id=GRAS
Ghir_A07G005240	LFY	FLO_LFY	-	http://plntfdb.bio.uni-potsdam.de/v3.0/fam_mem.php?family_id=LFY
Ghir_D04G017600	ABI3VP1	B3	AP2,Auxin_resp	http://plntfdb.bio.uni-potsdam.de/v3.0/fam_mem.php?family_id=ABI3VP1
Ghir_D01G007230	G2-like	G2-like	Response_reg	http://plntfdb.bio.uni-potsdam.de/v3.0/fam_mem.php?family_id=G2-like
Ghir_A05G027830.2	MADS	SRF-TF	-	http://plntfdb.bio.uni-potsdam.de/v3.0/fam_mem.php?family_id=MADS
Ghir_D07G021330.1	FAR1	FAR1	-	http://plntfdb.bio.uni-potsdam.de/v3.0/fam_mem.php?family_id=FAR1
Ghir_D13G023100	MYB	Myb_DNA-binding	ARID,Response_reg,SNF2_N	http://plntfdb.bio.uni-potsdam.de/v3.0/fam_mem.php?family_id=MYB
Ghir_D13G025110.1	C2C2-GATA	GATA	-	http://plntfdb.bio.uni-potsdam.de/v3.0/fam_mem.php?family_id=C2C2-GATA
Ghir_A08G026000	AP2-EREBP	AP2	-	http://plntfdb.bio.uni-potsdam.de/v3.0/fam_mem.php?family_id=AP2-EREBP
Ghir_D13G020830	HSF	HSF_DNA-bind	-	http://plntfdb.bio.uni-potsdam.de/v3.0/fam_mem.php?family_id=HSF
Ghir_A01G013730	G2-like	G2-like	Response_reg	http://plntfdb.bio.uni-potsdam.de/v3.0/fam_mem.php?family_id=G2-like
Ghir_A07G006060	TAZ	zf-TAZ	PHD	http://plntfdb.bio.uni-potsdam.de/v3.0/fam_mem.php?family_id=TAZ
Ghir_D12G025150	C2C2-Dof	zf-Dof	-	http://plntfdb.bio.uni-potsdam.de/v3.0/fam_mem.php?family_id=C2C2-Dof
Ghir_A05G017360	bHLH	HLH	-	http://plntfdb.bio.uni-potsdam.de/v3.0/fam_mem.php?family_id=bHLH
Ghir_D11G014940	AP2-EREBP	AP2	-	http://plntfdb.bio.uni-potsdam.de/v3.0/fam_mem.php?family_id=AP2-EREBP
Ghir_D10G025090	LOB	DUF260	-	http://plntfdb.bio.uni-potsdam.de/v3.0/fam_mem.php?family_id=LOB
Ghir_A11G032750	LOB	DUF260	-	http://plntfdb.bio.uni-potsdam.de/v3.0/fam_mem.php?family_id=LOB
Ghir_D03G016990	HB	Homeobox,KNOX1,KNOX2	-	http://plntfdb.bio.uni-potsdam.de/v3.0/fam_mem.php?family_id=HB
Ghir_D01G016920.1	Trihelix	trihelix	-	http://plntfdb.bio.uni-potsdam.de/v3.0/fam_mem.php?family_id=Trihelix
Ghir_A10G007030	FAR1	FAR1	-	http://plntfdb.bio.uni-potsdam.de/v3.0/fam_mem.php?family_id=FAR1
Ghir_A08G002960	AP2-EREBP	AP2	-	http://plntfdb.bio.uni-potsdam.de/v3.0/fam_mem.php?family_id=AP2-EREBP
Ghir_D12G006360.1	MADS	SRF-TF	-	http://plntfdb.bio.uni-potsdam.de/v3.0/fam_mem.php?family_id=MADS
Ghir_A04G007810	C2H2	zf-C2H2	PHD	http://plntfdb.bio.uni-potsdam.de/v3.0/fam_mem.php?family_id=C2H2
Ghir_D01G002640.1	mTERF	mTERF	-	http://plntfdb.bio.uni-potsdam.de/v3.0/fam_mem.php?family_id=mTERF
Ghir_A12G017450	MYB	Myb_DNA-binding	ARID,Response_reg,SNF2_N	http://plntfdb.bio.uni-potsdam.de/v3.0/fam_mem.php?family_id=MYB
Ghir_A12G003320	RWP-RK	RWP-RK	-	http://plntfdb.bio.uni-potsdam.de/v3.0/fam_mem.php?family_id=RWP-RK
Ghir_D06G006990	ABI3VP1	B3	AP2,Auxin_resp	http://plntfdb.bio.uni-potsdam.de/v3.0/fam_mem.php?family_id=ABI3VP1
Ghir_A10G008180	bHLH	HLH	-	http://plntfdb.bio.uni-potsdam.de/v3.0/fam_mem.php?family_id=bHLH
Ghir_A05G016500	C3H	zf-CCCH	PHD,SNF2_N,zf-C2H2	http://plntfdb.bio.uni-potsdam.de/v3.0/fam_mem.php?family_id=C3H
Ghir_D06G017030.1	WRKY	WRKY	-	http://plntfdb.bio.uni-potsdam.de/v3.0/fam_mem.php?family_id=WRKY
Ghir_D11G008390	SBP	SBP	-	http://plntfdb.bio.uni-potsdam.de/v3.0/fam_mem.php?family_id=SBP
Ghir_D11G014450	bHLH	HLH	-	http://plntfdb.bio.uni-potsdam.de/v3.0/fam_mem.php?family_id=bHLH
Ghir_A09G025530.1	WRKY	WRKY	-	http://plntfdb.bio.uni-potsdam.de/v3.0/fam_mem.php?family_id=WRKY
Ghir_D01G015000	G2-like	G2-like	Response_reg	http://plntfdb.bio.uni-potsdam.de/v3.0/fam_mem.php?family_id=G2-like
Ghir_D07G002270	LOB	DUF260	-	http://plntfdb.bio.uni-potsdam.de/v3.0/fam_mem.php?family_id=LOB
Ghir_D02G007890	MADS	SRF-TF	-	http://plntfdb.bio.uni-potsdam.de/v3.0/fam_mem.php?family_id=MADS
Ghir_A05G008210	NAC	NAM	-	http://plntfdb.bio.uni-potsdam.de/v3.0/fam_mem.php?family_id=NAC
Ghir_D13G007650	TCP	TCP	-	http://plntfdb.bio.uni-potsdam.de/v3.0/fam_mem.php?family_id=TCP
Ghir_D12G016770.1	PLATZ	PLATZ	-	http://plntfdb.bio.uni-potsdam.de/v3.0/fam_mem.php?family_id=PLATZ
Ghir_A02G017200	bHLH	HLH	-	http://plntfdb.bio.uni-potsdam.de/v3.0/fam_mem.php?family_id=bHLH
Ghir_D02G007020	AP2-EREBP	AP2	-	http://plntfdb.bio.uni-potsdam.de/v3.0/fam_mem.php?family_id=AP2-EREBP
Ghir_A06G019720	WRKY	WRKY	-	http://plntfdb.bio.uni-potsdam.de/v3.0/fam_mem.php?family_id=WRKY
Ghir_A13G022890	MYB	Myb_DNA-binding	ARID,Response_reg,SNF2_N	http://plntfdb.bio.uni-potsdam.de/v3.0/fam_mem.php?family_id=MYB
Ghir_D09G015940	MYB	Myb_DNA-binding	ARID,Response_reg,SNF2_N	http://plntfdb.bio.uni-potsdam.de/v3.0/fam_mem.php?family_id=MYB
Ghir_A12G003710	bHLH	HLH	-	http://plntfdb.bio.uni-potsdam.de/v3.0/fam_mem.php?family_id=bHLH
Ghir_D05G026430	BES1	DUF822	-	http://plntfdb.bio.uni-potsdam.de/v3.0/fam_mem.php?family_id=BES1
Ghir_A13G022960	C3H	zf-CCCH	PHD,SNF2_N,zf-C2H2	http://plntfdb.bio.uni-potsdam.de/v3.0/fam_mem.php?family_id=C3H
Ghir_A07G015380	MADS	SRF-TF	-	http://plntfdb.bio.uni-potsdam.de/v3.0/fam_mem.php?family_id=MADS
Ghir_D06G010600	bHLH	HLH	-	http://plntfdb.bio.uni-potsdam.de/v3.0/fam_mem.php?family_id=bHLH
Ghir_D05G024690	Trihelix	trihelix	-	http://plntfdb.bio.uni-potsdam.de/v3.0/fam_mem.php?family_id=Trihelix
Ghir_D04G009800	OFP	Ovate	-	http://plntfdb.bio.uni-potsdam.de/v3.0/fam_mem.php?family_id=OFP
Ghir_D06G012760	Alfin-like	Alfin-like	DDT,Homeobox,JmjC,JmjN	http://plntfdb.bio.uni-potsdam.de/v3.0/fam_mem.php?family_id=Alfin-like
Ghir_D12G004370	ABI3VP1	B3	AP2,Auxin_resp	http://plntfdb.bio.uni-potsdam.de/v3.0/fam_mem.php?family_id=ABI3VP1
Ghir_A04G013230	ABI3VP1	B3	AP2,Auxin_resp	http://plntfdb.bio.uni-potsdam.de/v3.0/fam_mem.php?family_id=ABI3VP1
Ghir_A04G005050	MADS	SRF-TF	-	http://plntfdb.bio.uni-potsdam.de/v3.0/fam_mem.php?family_id=MADS
Ghir_A09G000800	ARF	Auxin_resp	-	http://plntfdb.bio.uni-potsdam.de/v3.0/fam_mem.php?family_id=ARF
Ghir_A05G034290	bHLH	HLH	-	http://plntfdb.bio.uni-potsdam.de/v3.0/fam_mem.php?family_id=bHLH
Ghir_A13G018490	AP2-EREBP	AP2	-	http://plntfdb.bio.uni-potsdam.de/v3.0/fam_mem.php?family_id=AP2-EREBP
Ghir_A07G005580	SBP	SBP	-	http://plntfdb.bio.uni-potsdam.de/v3.0/fam_mem.php?family_id=SBP
Ghir_D13G019150	AP2-EREBP	AP2	-	http://plntfdb.bio.uni-potsdam.de/v3.0/fam_mem.php?family_id=AP2-EREBP
Ghir_D13G009120.1	bHLH	HLH	-	http://plntfdb.bio.uni-potsdam.de/v3.0/fam_mem.php?family_id=bHLH
Ghir_A03G004160	C3H	zf-CCCH	PHD,SNF2_N,zf-C2H2	http://plntfdb.bio.uni-potsdam.de/v3.0/fam_mem.php?family_id=C3H
Ghir_D12G019830	ABI3VP1	B3	AP2,Auxin_resp	http://plntfdb.bio.uni-potsdam.de/v3.0/fam_mem.php?family_id=ABI3VP1
Ghir_D03G009280	ARF	Auxin_resp	-	http://plntfdb.bio.uni-potsdam.de/v3.0/fam_mem.php?family_id=ARF
Ghir_A10G011300	bHLH	HLH	-	http://plntfdb.bio.uni-potsdam.de/v3.0/fam_mem.php?family_id=bHLH
Ghir_A13G003540.1	G2-like	G2-like	Response_reg	http://plntfdb.bio.uni-potsdam.de/v3.0/fam_mem.php?family_id=G2-like
Ghir_D12G015720	bHLH	HLH	-	http://plntfdb.bio.uni-potsdam.de/v3.0/fam_mem.php?family_id=bHLH
Ghir_A03G003040	ABI3VP1	B3	AP2,Auxin_resp	http://plntfdb.bio.uni-potsdam.de/v3.0/fam_mem.php?family_id=ABI3VP1
Ghir_D09G009540.2	C3H	zf-CCCH	PHD,SNF2_N,zf-C2H2	http://plntfdb.bio.uni-potsdam.de/v3.0/fam_mem.php?family_id=C3H
Ghir_D10G010760	bHLH	HLH	-	http://plntfdb.bio.uni-potsdam.de/v3.0/fam_mem.php?family_id=bHLH
Ghir_A08G000470.1	C2C2-Dof	zf-Dof	-	http://plntfdb.bio.uni-potsdam.de/v3.0/fam_mem.php?family_id=C2C2-Dof
Ghir_A08G002770	NOZZLE	NOZZLE_Angio	-	http://plntfdb.bio.uni-potsdam.de/v3.0/fam_mem.php?family_id=NOZZLE
Ghir_D10G016060.1	Tify	tify	GATA	http://plntfdb.bio.uni-potsdam.de/v3.0/fam_mem.php?family_id=Tify
Ghir_D12G008630.1	AP2-EREBP	AP2	-	http://plntfdb.bio.uni-potsdam.de/v3.0/fam_mem.php?family_id=AP2-EREBP
Ghir_D01G004700.1	C2C2-YABBY	YABBY	-	http://plntfdb.bio.uni-potsdam.de/v3.0/fam_mem.php?family_id=C2C2-YABBY
Ghir_D12G027190	MYB	Myb_DNA-binding	ARID,Response_reg,SNF2_N	http://plntfdb.bio.uni-potsdam.de/v3.0/fam_mem.php?family_id=MYB
Ghir_D08G025540	TUB	Tub	-	http://plntfdb.bio.uni-potsdam.de/v3.0/fam_mem.php?family_id=TUB
Ghir_A05G002100	GRAS	GRAS	-	http://plntfdb.bio.uni-potsdam.de/v3.0/fam_mem.php?family_id=GRAS
Ghir_D10G006410	C2H2	zf-C2H2	PHD	http://plntfdb.bio.uni-potsdam.de/v3.0/fam_mem.php?family_id=C2H2
Ghir_D02G006830	NAC	NAM	-	http://plntfdb.bio.uni-potsdam.de/v3.0/fam_mem.php?family_id=NAC
Ghir_D10G024960	GRAS	GRAS	-	http://plntfdb.bio.uni-potsdam.de/v3.0/fam_mem.php?family_id=GRAS
Ghir_A09G025450	AP2-EREBP	AP2	-	http://plntfdb.bio.uni-potsdam.de/v3.0/fam_mem.php?family_id=AP2-EREBP
Ghir_D09G023220	AP2-EREBP	AP2	-	http://plntfdb.bio.uni-potsdam.de/v3.0/fam_mem.php?family_id=AP2-EREBP
Ghir_D10G008850.2	ARF	Auxin_resp	-	http://plntfdb.bio.uni-potsdam.de/v3.0/fam_mem.php?family_id=ARF
Ghir_D02G005170	C3H	zf-CCCH	PHD,SNF2_N,zf-C2H2	http://plntfdb.bio.uni-potsdam.de/v3.0/fam_mem.php?family_id=C3H
Ghir_D03G001510	GRAS	GRAS	-	http://plntfdb.bio.uni-potsdam.de/v3.0/fam_mem.php?family_id=GRAS
Ghir_A05G040340	C3H	zf-CCCH	PHD,SNF2_N,zf-C2H2	http://plntfdb.bio.uni-potsdam.de/v3.0/fam_mem.php?family_id=C3H
Ghir_D01G002080	Tify	tify	GATA	http://plntfdb.bio.uni-potsdam.de/v3.0/fam_mem.php?family_id=Tify
Ghir_D10G002700.1	MYB	Myb_DNA-binding	ARID,Response_reg,SNF2_N	http://plntfdb.bio.uni-potsdam.de/v3.0/fam_mem.php?family_id=MYB
Ghir_D11G004290	bHLH	HLH	-	http://plntfdb.bio.uni-potsdam.de/v3.0/fam_mem.php?family_id=bHLH
Ghir_A08G019960	NAC	NAM	-	http://plntfdb.bio.uni-potsdam.de/v3.0/fam_mem.php?family_id=NAC
Ghir_D09G015160	Sigma70-like	Sigma70_r2,Sigma70_r3,Sigma70_r4	-	http://plntfdb.bio.uni-potsdam.de/v3.0/fam_mem.php?family_id=Sigma70-like
Ghir_A01G017520	ABI3VP1	B3	AP2,Auxin_resp	http://plntfdb.bio.uni-potsdam.de/v3.0/fam_mem.php?family_id=ABI3VP1
Ghir_D04G020140	MADS	SRF-TF	-	http://plntfdb.bio.uni-potsdam.de/v3.0/fam_mem.php?family_id=MADS
Ghir_A13G012580	bHLH	HLH	-	http://plntfdb.bio.uni-potsdam.de/v3.0/fam_mem.php?family_id=bHLH
Ghir_D12G026900	MYB	Myb_DNA-binding	ARID,Response_reg,SNF2_N	http://plntfdb.bio.uni-potsdam.de/v3.0/fam_mem.php?family_id=MYB
Ghir_D05G020060	BES1	DUF822	-	http://plntfdb.bio.uni-potsdam.de/v3.0/fam_mem.php?family_id=BES1
Ghir_A09G022590	OFP	Ovate	-	http://plntfdb.bio.uni-potsdam.de/v3.0/fam_mem.php?family_id=OFP
Ghir_D01G006050	NAC	NAM	-	http://plntfdb.bio.uni-potsdam.de/v3.0/fam_mem.php?family_id=NAC
Ghir_D12G014860	MYB	Myb_DNA-binding	ARID,Response_reg,SNF2_N	http://plntfdb.bio.uni-potsdam.de/v3.0/fam_mem.php?family_id=MYB
Ghir_D13G024190.1	E2F-DP	E2F_TDP	-	http://plntfdb.bio.uni-potsdam.de/v3.0/fam_mem.php?family_id=E2F-DP
Ghir_A13G014550	FHA	FHA	-	http://plntfdb.bio.uni-potsdam.de/v3.0/fam_mem.php?family_id=FHA
Ghir_D01G000600	ABI3VP1	B3	AP2,Auxin_resp	http://plntfdb.bio.uni-potsdam.de/v3.0/fam_mem.php?family_id=ABI3VP1
Ghir_D11G035190	OFP	Ovate	-	http://plntfdb.bio.uni-potsdam.de/v3.0/fam_mem.php?family_id=OFP
Ghir_D10G022420	AP2-EREBP	AP2	-	http://plntfdb.bio.uni-potsdam.de/v3.0/fam_mem.php?family_id=AP2-EREBP
Ghir_D08G018280	AP2-EREBP	AP2	-	http://plntfdb.bio.uni-potsdam.de/v3.0/fam_mem.php?family_id=AP2-EREBP
Ghir_D13G014730	mTERF	mTERF	-	http://plntfdb.bio.uni-potsdam.de/v3.0/fam_mem.php?family_id=mTERF
Ghir_A04G008890.1	bHLH	HLH	-	http://plntfdb.bio.uni-potsdam.de/v3.0/fam_mem.php?family_id=bHLH
Ghir_A05G026520	MYB	Myb_DNA-binding	ARID,Response_reg,SNF2_N	http://plntfdb.bio.uni-potsdam.de/v3.0/fam_mem.php?family_id=MYB
Ghir_D07G006650	G2-like	G2-like	Response_reg	http://plntfdb.bio.uni-potsdam.de/v3.0/fam_mem.php?family_id=G2-like
Ghir_A09G001290	AP2-EREBP	AP2	-	http://plntfdb.bio.uni-potsdam.de/v3.0/fam_mem.php?family_id=AP2-EREBP
Ghir_A08G017270	C2C2-GATA	GATA	-	http://plntfdb.bio.uni-potsdam.de/v3.0/fam_mem.php?family_id=C2C2-GATA
Ghir_D02G012350	FAR1	FAR1	-	http://plntfdb.bio.uni-potsdam.de/v3.0/fam_mem.php?family_id=FAR1
Ghir_D01G019050	TCP	TCP	-	http://plntfdb.bio.uni-potsdam.de/v3.0/fam_mem.php?family_id=TCP
Ghir_A12G023380	MYB	Myb_DNA-binding	ARID,Response_reg,SNF2_N	http://plntfdb.bio.uni-potsdam.de/v3.0/fam_mem.php?family_id=MYB
Ghir_D07G009430	C3H	zf-CCCH	PHD,SNF2_N,zf-C2H2	http://plntfdb.bio.uni-potsdam.de/v3.0/fam_mem.php?family_id=C3H
Ghir_A01G022830	NOZZLE	NOZZLE_Angio	-	http://plntfdb.bio.uni-potsdam.de/v3.0/fam_mem.php?family_id=NOZZLE
Ghir_D02G021530	C2H2	zf-C2H2	PHD	http://plntfdb.bio.uni-potsdam.de/v3.0/fam_mem.php?family_id=C2H2
Ghir_D11G014680	BSD	BSD	-	http://plntfdb.bio.uni-potsdam.de/v3.0/fam_mem.php?family_id=BSD
Ghir_A02G005400	CAMTA	CG-1,IQ	-	http://plntfdb.bio.uni-potsdam.de/v3.0/fam_mem.php?family_id=CAMTA
Ghir_A11G011870	MYB	Myb_DNA-binding	ARID,Response_reg,SNF2_N	http://plntfdb.bio.uni-potsdam.de/v3.0/fam_mem.php?family_id=MYB
Ghir_A02G017520	MYB	Myb_DNA-binding	ARID,Response_reg,SNF2_N	http://plntfdb.bio.uni-potsdam.de/v3.0/fam_mem.php?family_id=MYB
Ghir_D11G027620	Trihelix	trihelix	-	http://plntfdb.bio.uni-potsdam.de/v3.0/fam_mem.php?family_id=Trihelix
Ghir_D07G011970	OFP	Ovate	-	http://plntfdb.bio.uni-potsdam.de/v3.0/fam_mem.php?family_id=OFP
Ghir_A13G001450	ABI3VP1	B3	AP2,Auxin_resp	http://plntfdb.bio.uni-potsdam.de/v3.0/fam_mem.php?family_id=ABI3VP1
Ghir_D08G018850	GRAS	GRAS	-	http://plntfdb.bio.uni-potsdam.de/v3.0/fam_mem.php?family_id=GRAS
Ghir_A09G000810	bHLH	HLH	-	http://plntfdb.bio.uni-potsdam.de/v3.0/fam_mem.php?family_id=bHLH
Ghir_A12G002650	ABI3VP1	B3	AP2,Auxin_resp	http://plntfdb.bio.uni-potsdam.de/v3.0/fam_mem.php?family_id=ABI3VP1
Ghir_A07G019190	GRAS	GRAS	-	http://plntfdb.bio.uni-potsdam.de/v3.0/fam_mem.php?family_id=GRAS
Ghir_A01G000920	MYB	Myb_DNA-binding	ARID,Response_reg,SNF2_N	http://plntfdb.bio.uni-potsdam.de/v3.0/fam_mem.php?family_id=MYB
Ghir_A05G032080.1	TIG	TIG	-	http://plntfdb.bio.uni-potsdam.de/v3.0/fam_mem.php?family_id=TIG
Ghir_D08G025970	MYB	Myb_DNA-binding	ARID,Response_reg,SNF2_N	http://plntfdb.bio.uni-potsdam.de/v3.0/fam_mem.php?family_id=MYB
Ghir_D08G014980	WRKY	WRKY	-	http://plntfdb.bio.uni-potsdam.de/v3.0/fam_mem.php?family_id=WRKY
Ghir_A03G007020	MYB	Myb_DNA-binding	ARID,Response_reg,SNF2_N	http://plntfdb.bio.uni-potsdam.de/v3.0/fam_mem.php?family_id=MYB
Ghir_A12G006610	bHLH	HLH	-	http://plntfdb.bio.uni-potsdam.de/v3.0/fam_mem.php?family_id=bHLH
Ghir_A06G007580	C2C2-GATA	GATA	-	http://plntfdb.bio.uni-potsdam.de/v3.0/fam_mem.php?family_id=C2C2-GATA
Ghir_D09G004110	TCP	TCP	-	http://plntfdb.bio.uni-potsdam.de/v3.0/fam_mem.php?family_id=TCP
Ghir_A02G017410	ABI3VP1	B3	AP2,Auxin_resp	http://plntfdb.bio.uni-potsdam.de/v3.0/fam_mem.php?family_id=ABI3VP1
Ghir_A13G018510	AP2-EREBP	AP2	-	http://plntfdb.bio.uni-potsdam.de/v3.0/fam_mem.php?family_id=AP2-EREBP
Ghir_D04G001740	Trihelix	trihelix	-	http://plntfdb.bio.uni-potsdam.de/v3.0/fam_mem.php?family_id=Trihelix
Ghir_A08G003340.1	C3H	zf-CCCH	PHD,SNF2_N,zf-C2H2	http://plntfdb.bio.uni-potsdam.de/v3.0/fam_mem.php?family_id=C3H
Ghir_D01G010820	ARF	Auxin_resp	-	http://plntfdb.bio.uni-potsdam.de/v3.0/fam_mem.php?family_id=ARF
BGI_novel_G001661	WRKY	WRKY	-	http://plntfdb.bio.uni-potsdam.de/v3.0/fam_mem.php?family_id=WRKY
Ghir_A01G004880	ABI3VP1	B3	AP2,Auxin_resp	http://plntfdb.bio.uni-potsdam.de/v3.0/fam_mem.php?family_id=ABI3VP1
Ghir_D10G019520.1	TIG	TIG	-	http://plntfdb.bio.uni-potsdam.de/v3.0/fam_mem.php?family_id=TIG
Ghir_D02G024530	MADS	SRF-TF	-	http://plntfdb.bio.uni-potsdam.de/v3.0/fam_mem.php?family_id=MADS
Ghir_A10G021130	MYB	Myb_DNA-binding	ARID,Response_reg,SNF2_N	http://plntfdb.bio.uni-potsdam.de/v3.0/fam_mem.php?family_id=MYB
Ghir_A12G000900	C3H	zf-CCCH	PHD,SNF2_N,zf-C2H2	http://plntfdb.bio.uni-potsdam.de/v3.0/fam_mem.php?family_id=C3H
Ghir_A13G016590	PLATZ	PLATZ	-	http://plntfdb.bio.uni-potsdam.de/v3.0/fam_mem.php?family_id=PLATZ
Ghir_A05G016280	LOB	DUF260	-	http://plntfdb.bio.uni-potsdam.de/v3.0/fam_mem.php?family_id=LOB
Ghir_D12G014460	MYB	Myb_DNA-binding	ARID,Response_reg,SNF2_N	http://plntfdb.bio.uni-potsdam.de/v3.0/fam_mem.php?family_id=MYB
Ghir_A02G006830	C2C2-Dof	zf-Dof	-	http://plntfdb.bio.uni-potsdam.de/v3.0/fam_mem.php?family_id=C2C2-Dof
Ghir_A02G004920	ABI3VP1	B3	AP2,Auxin_resp	http://plntfdb.bio.uni-potsdam.de/v3.0/fam_mem.php?family_id=ABI3VP1
Ghir_D06G000460	SRS	DUF702	-	http://plntfdb.bio.uni-potsdam.de/v3.0/fam_mem.php?family_id=SRS
Ghir_D01G016490	C2C2-YABBY	YABBY	-	http://plntfdb.bio.uni-potsdam.de/v3.0/fam_mem.php?family_id=C2C2-YABBY
Ghir_A12G022680	C2C2-GATA	GATA	-	http://plntfdb.bio.uni-potsdam.de/v3.0/fam_mem.php?family_id=C2C2-GATA
Ghir_A02G001220.1	GRAS	GRAS	-	http://plntfdb.bio.uni-potsdam.de/v3.0/fam_mem.php?family_id=GRAS
Ghir_D13G015580	GRAS	GRAS	-	http://plntfdb.bio.uni-potsdam.de/v3.0/fam_mem.php?family_id=GRAS
Ghir_D10G021600	bHLH	HLH	-	http://plntfdb.bio.uni-potsdam.de/v3.0/fam_mem.php?family_id=bHLH
Ghir_A09G006930.1	TUB	Tub	-	http://plntfdb.bio.uni-potsdam.de/v3.0/fam_mem.php?family_id=TUB
Ghir_A02G012270.1	mTERF	mTERF	-	http://plntfdb.bio.uni-potsdam.de/v3.0/fam_mem.php?family_id=mTERF
Ghir_A05G017630	WRKY	WRKY	-	http://plntfdb.bio.uni-potsdam.de/v3.0/fam_mem.php?family_id=WRKY
Ghir_D02G013010	mTERF	mTERF	-	http://plntfdb.bio.uni-potsdam.de/v3.0/fam_mem.php?family_id=mTERF
Ghir_A12G007670	AP2-EREBP	AP2	-	http://plntfdb.bio.uni-potsdam.de/v3.0/fam_mem.php?family_id=AP2-EREBP
Ghir_D05G010350	C2C2-GATA	GATA	-	http://plntfdb.bio.uni-potsdam.de/v3.0/fam_mem.php?family_id=C2C2-GATA
Ghir_A01G017510	ABI3VP1	B3	AP2,Auxin_resp	http://plntfdb.bio.uni-potsdam.de/v3.0/fam_mem.php?family_id=ABI3VP1
Ghir_A10G018200.1	Alfin-like	Alfin-like	DDT,Homeobox,JmjC,JmjN	http://plntfdb.bio.uni-potsdam.de/v3.0/fam_mem.php?family_id=Alfin-like
Ghir_D02G003910	CPP	TCR	-	http://plntfdb.bio.uni-potsdam.de/v3.0/fam_mem.php?family_id=CPP
Ghir_A12G007050	ABI3VP1	B3	AP2,Auxin_resp	http://plntfdb.bio.uni-potsdam.de/v3.0/fam_mem.php?family_id=ABI3VP1
Ghir_D01G002670	mTERF	mTERF	-	http://plntfdb.bio.uni-potsdam.de/v3.0/fam_mem.php?family_id=mTERF
Ghir_A01G020120	AP2-EREBP	AP2	-	http://plntfdb.bio.uni-potsdam.de/v3.0/fam_mem.php?family_id=AP2-EREBP
Ghir_A10G019600	mTERF	mTERF	-	http://plntfdb.bio.uni-potsdam.de/v3.0/fam_mem.php?family_id=mTERF
Ghir_D12G012120	AP2-EREBP	AP2	-	http://plntfdb.bio.uni-potsdam.de/v3.0/fam_mem.php?family_id=AP2-EREBP
Ghir_A11G035240.1	E2F-DP	E2F_TDP	-	http://plntfdb.bio.uni-potsdam.de/v3.0/fam_mem.php?family_id=E2F-DP
Ghir_D08G013880.1	NAC	NAM	-	http://plntfdb.bio.uni-potsdam.de/v3.0/fam_mem.php?family_id=NAC
Ghir_A01G002730	mTERF	mTERF	-	http://plntfdb.bio.uni-potsdam.de/v3.0/fam_mem.php?family_id=mTERF
Ghir_D07G008520	bHLH	HLH	-	http://plntfdb.bio.uni-potsdam.de/v3.0/fam_mem.php?family_id=bHLH
Ghir_A12G016120.2	SBP	SBP	-	http://plntfdb.bio.uni-potsdam.de/v3.0/fam_mem.php?family_id=SBP
Ghir_A03G006890	NAC	NAM	-	http://plntfdb.bio.uni-potsdam.de/v3.0/fam_mem.php?family_id=NAC
Ghir_D10G005190	Trihelix	trihelix	-	http://plntfdb.bio.uni-potsdam.de/v3.0/fam_mem.php?family_id=Trihelix
Ghir_A10G004240	ARF	Auxin_resp	-	http://plntfdb.bio.uni-potsdam.de/v3.0/fam_mem.php?family_id=ARF
Ghir_D09G004110.1	TCP	TCP	-	http://plntfdb.bio.uni-potsdam.de/v3.0/fam_mem.php?family_id=TCP
Ghir_D04G019120	ABI3VP1	B3	AP2,Auxin_resp	http://plntfdb.bio.uni-potsdam.de/v3.0/fam_mem.php?family_id=ABI3VP1
Ghir_D05G016380	C2C2-Dof	zf-Dof	-	http://plntfdb.bio.uni-potsdam.de/v3.0/fam_mem.php?family_id=C2C2-Dof
Ghir_A03G005180	MYB	Myb_DNA-binding	ARID,Response_reg,SNF2_N	http://plntfdb.bio.uni-potsdam.de/v3.0/fam_mem.php?family_id=MYB
Ghir_D02G011920	AP2-EREBP	AP2	-	http://plntfdb.bio.uni-potsdam.de/v3.0/fam_mem.php?family_id=AP2-EREBP
Ghir_A03G016190	bHLH	HLH	-	http://plntfdb.bio.uni-potsdam.de/v3.0/fam_mem.php?family_id=bHLH
Ghir_A03G011730	MYB	Myb_DNA-binding	ARID,Response_reg,SNF2_N	http://plntfdb.bio.uni-potsdam.de/v3.0/fam_mem.php?family_id=MYB
Ghir_D01G023840	G2-like	G2-like	Response_reg	http://plntfdb.bio.uni-potsdam.de/v3.0/fam_mem.php?family_id=G2-like
Ghir_D08G020830	NAC	NAM	-	http://plntfdb.bio.uni-potsdam.de/v3.0/fam_mem.php?family_id=NAC
BGI_novel_G003457	ABI3VP1	B3	AP2,Auxin_resp	http://plntfdb.bio.uni-potsdam.de/v3.0/fam_mem.php?family_id=ABI3VP1
Ghir_A12G016460	C2H2	zf-C2H2	PHD	http://plntfdb.bio.uni-potsdam.de/v3.0/fam_mem.php?family_id=C2H2
Ghir_D03G002880	TAZ	zf-TAZ	PHD	http://plntfdb.bio.uni-potsdam.de/v3.0/fam_mem.php?family_id=TAZ
Ghir_D06G002210	LIM	LIM	-	http://plntfdb.bio.uni-potsdam.de/v3.0/fam_mem.php?family_id=LIM
Ghir_D12G006610	TUB	Tub	-	http://plntfdb.bio.uni-potsdam.de/v3.0/fam_mem.php?family_id=TUB
Ghir_A11G010950	bHLH	HLH	-	http://plntfdb.bio.uni-potsdam.de/v3.0/fam_mem.php?family_id=bHLH
Ghir_A07G008740	MADS	SRF-TF	-	http://plntfdb.bio.uni-potsdam.de/v3.0/fam_mem.php?family_id=MADS
Ghir_D04G007410	MYB	Myb_DNA-binding	ARID,Response_reg,SNF2_N	http://plntfdb.bio.uni-potsdam.de/v3.0/fam_mem.php?family_id=MYB
Ghir_A08G017590	AP2-EREBP	AP2	-	http://plntfdb.bio.uni-potsdam.de/v3.0/fam_mem.php?family_id=AP2-EREBP
Ghir_D08G025540.1	TUB	Tub	-	http://plntfdb.bio.uni-potsdam.de/v3.0/fam_mem.php?family_id=TUB
Ghir_D09G010370	E2F-DP	E2F_TDP	-	http://plntfdb.bio.uni-potsdam.de/v3.0/fam_mem.php?family_id=E2F-DP
Ghir_A07G006450	BSD	BSD	-	http://plntfdb.bio.uni-potsdam.de/v3.0/fam_mem.php?family_id=BSD
Ghir_A08G003390	C3H	zf-CCCH	PHD,SNF2_N,zf-C2H2	http://plntfdb.bio.uni-potsdam.de/v3.0/fam_mem.php?family_id=C3H
Ghir_A01G007780	GRAS	GRAS	-	http://plntfdb.bio.uni-potsdam.de/v3.0/fam_mem.php?family_id=GRAS
Ghir_A04G005150	NAC	NAM	-	http://plntfdb.bio.uni-potsdam.de/v3.0/fam_mem.php?family_id=NAC
Ghir_D05G026320	TUB	Tub	-	http://plntfdb.bio.uni-potsdam.de/v3.0/fam_mem.php?family_id=TUB
Ghir_A12G001730	MADS	SRF-TF	-	http://plntfdb.bio.uni-potsdam.de/v3.0/fam_mem.php?family_id=MADS
Ghir_A12G023120.1	NAC	NAM	-	http://plntfdb.bio.uni-potsdam.de/v3.0/fam_mem.php?family_id=NAC
Ghir_A09G019960	AP2-EREBP	AP2	-	http://plntfdb.bio.uni-potsdam.de/v3.0/fam_mem.php?family_id=AP2-EREBP
Ghir_D11G013290	HSF	HSF_DNA-bind	-	http://plntfdb.bio.uni-potsdam.de/v3.0/fam_mem.php?family_id=HSF
Ghir_A07G019180	MYB	Myb_DNA-binding	ARID,Response_reg,SNF2_N	http://plntfdb.bio.uni-potsdam.de/v3.0/fam_mem.php?family_id=MYB
Ghir_A11G007010	bHLH	HLH	-	http://plntfdb.bio.uni-potsdam.de/v3.0/fam_mem.php?family_id=bHLH
Ghir_A05G007060.1	FAR1	FAR1	-	http://plntfdb.bio.uni-potsdam.de/v3.0/fam_mem.php?family_id=FAR1
BGI_novel_G003409	PLATZ	PLATZ	-	http://plntfdb.bio.uni-potsdam.de/v3.0/fam_mem.php?family_id=PLATZ
Ghir_D05G021390	bHLH	HLH	-	http://plntfdb.bio.uni-potsdam.de/v3.0/fam_mem.php?family_id=bHLH
Ghir_D10G000900	WRKY	WRKY	-	http://plntfdb.bio.uni-potsdam.de/v3.0/fam_mem.php?family_id=WRKY
Ghir_D06G020570	WRKY	WRKY	-	http://plntfdb.bio.uni-potsdam.de/v3.0/fam_mem.php?family_id=WRKY
Ghir_D13G022640	CPP	TCR	-	http://plntfdb.bio.uni-potsdam.de/v3.0/fam_mem.php?family_id=CPP
Ghir_D07G000550	OFP	Ovate	-	http://plntfdb.bio.uni-potsdam.de/v3.0/fam_mem.php?family_id=OFP
Ghir_D01G009480	GRAS	GRAS	-	http://plntfdb.bio.uni-potsdam.de/v3.0/fam_mem.php?family_id=GRAS
Ghir_D11G018490.1	MYB	Myb_DNA-binding	ARID,Response_reg,SNF2_N	http://plntfdb.bio.uni-potsdam.de/v3.0/fam_mem.php?family_id=MYB
Ghir_D12G028920	MYB	Myb_DNA-binding	ARID,Response_reg,SNF2_N	http://plntfdb.bio.uni-potsdam.de/v3.0/fam_mem.php?family_id=MYB
Ghir_A08G024270.1	Alfin-like	Alfin-like	DDT,Homeobox,JmjC,JmjN	http://plntfdb.bio.uni-potsdam.de/v3.0/fam_mem.php?family_id=Alfin-like
Ghir_D13G013960.4	C3H	zf-CCCH	PHD,SNF2_N,zf-C2H2	http://plntfdb.bio.uni-potsdam.de/v3.0/fam_mem.php?family_id=C3H
Ghir_D11G000260	C2H2	zf-C2H2	PHD	http://plntfdb.bio.uni-potsdam.de/v3.0/fam_mem.php?family_id=C2H2
Ghir_A07G012150	C2C2-YABBY	YABBY	-	http://plntfdb.bio.uni-potsdam.de/v3.0/fam_mem.php?family_id=C2C2-YABBY
Ghir_A02G014490	zf-HD	ZF-HD_dimer	-	http://plntfdb.bio.uni-potsdam.de/v3.0/fam_mem.php?family_id=zf-HD
Ghir_A06G000920.1	MYB	Myb_DNA-binding	ARID,Response_reg,SNF2_N	http://plntfdb.bio.uni-potsdam.de/v3.0/fam_mem.php?family_id=MYB
Ghir_D12G004350	zf-HD	ZF-HD_dimer	-	http://plntfdb.bio.uni-potsdam.de/v3.0/fam_mem.php?family_id=zf-HD
Ghir_D11G035700	MYB	Myb_DNA-binding	ARID,Response_reg,SNF2_N	http://plntfdb.bio.uni-potsdam.de/v3.0/fam_mem.php?family_id=MYB
Ghir_A13G010970	CPP	TCR	-	http://plntfdb.bio.uni-potsdam.de/v3.0/fam_mem.php?family_id=CPP
BGI_novel_G005627	ARF	Auxin_resp	-	http://plntfdb.bio.uni-potsdam.de/v3.0/fam_mem.php?family_id=ARF
Ghir_A11G008610	C2C2-YABBY	YABBY	-	http://plntfdb.bio.uni-potsdam.de/v3.0/fam_mem.php?family_id=C2C2-YABBY
Ghir_D13G013360	NAC	NAM	-	http://plntfdb.bio.uni-potsdam.de/v3.0/fam_mem.php?family_id=NAC
Ghir_D07G008730	GRAS	GRAS	-	http://plntfdb.bio.uni-potsdam.de/v3.0/fam_mem.php?family_id=GRAS
Ghir_D06G021610	LOB	DUF260	-	http://plntfdb.bio.uni-potsdam.de/v3.0/fam_mem.php?family_id=LOB
Ghir_A04G011800	MYB	Myb_DNA-binding	ARID,Response_reg,SNF2_N	http://plntfdb.bio.uni-potsdam.de/v3.0/fam_mem.php?family_id=MYB
Ghir_A12G010310	SBP	SBP	-	http://plntfdb.bio.uni-potsdam.de/v3.0/fam_mem.php?family_id=SBP
Ghir_D10G000130	G2-like	G2-like	Response_reg	http://plntfdb.bio.uni-potsdam.de/v3.0/fam_mem.php?family_id=G2-like
Ghir_A13G006110	MADS	SRF-TF	-	http://plntfdb.bio.uni-potsdam.de/v3.0/fam_mem.php?family_id=MADS
Ghir_A13G009690	bHLH	HLH	-	http://plntfdb.bio.uni-potsdam.de/v3.0/fam_mem.php?family_id=bHLH
Ghir_A10G002560	ARF	Auxin_resp	-	http://plntfdb.bio.uni-potsdam.de/v3.0/fam_mem.php?family_id=ARF
Ghir_A08G023640.2	C3H	zf-CCCH	PHD,SNF2_N,zf-C2H2	http://plntfdb.bio.uni-potsdam.de/v3.0/fam_mem.php?family_id=C3H
Ghir_D01G021120	OFP	Ovate	-	http://plntfdb.bio.uni-potsdam.de/v3.0/fam_mem.php?family_id=OFP
Ghir_A12G023820	AP2-EREBP	AP2	-	http://plntfdb.bio.uni-potsdam.de/v3.0/fam_mem.php?family_id=AP2-EREBP
Ghir_A04G013150	G2-like	G2-like	Response_reg	http://plntfdb.bio.uni-potsdam.de/v3.0/fam_mem.php?family_id=G2-like
Ghir_A01G017880	MYB	Myb_DNA-binding	ARID,Response_reg,SNF2_N	http://plntfdb.bio.uni-potsdam.de/v3.0/fam_mem.php?family_id=MYB
Ghir_A07G021340	bHLH	HLH	-	http://plntfdb.bio.uni-potsdam.de/v3.0/fam_mem.php?family_id=bHLH
Ghir_A02G007610	NAC	NAM	-	http://plntfdb.bio.uni-potsdam.de/v3.0/fam_mem.php?family_id=NAC
Ghir_D08G007780	ARF	Auxin_resp	-	http://plntfdb.bio.uni-potsdam.de/v3.0/fam_mem.php?family_id=ARF
Ghir_A05G010900	MYB	Myb_DNA-binding	ARID,Response_reg,SNF2_N	http://plntfdb.bio.uni-potsdam.de/v3.0/fam_mem.php?family_id=MYB
Ghir_D10G004230	Trihelix	trihelix	-	http://plntfdb.bio.uni-potsdam.de/v3.0/fam_mem.php?family_id=Trihelix
Ghir_D09G007910	NAC	NAM	-	http://plntfdb.bio.uni-potsdam.de/v3.0/fam_mem.php?family_id=NAC
Ghir_A07G010370	MYB	Myb_DNA-binding	ARID,Response_reg,SNF2_N	http://plntfdb.bio.uni-potsdam.de/v3.0/fam_mem.php?family_id=MYB
Ghir_A05G022430	bHLH	HLH	-	http://plntfdb.bio.uni-potsdam.de/v3.0/fam_mem.php?family_id=bHLH
Ghir_A13G014360	MYB	Myb_DNA-binding	ARID,Response_reg,SNF2_N	http://plntfdb.bio.uni-potsdam.de/v3.0/fam_mem.php?family_id=MYB
Ghir_D03G000370	NAC	NAM	-	http://plntfdb.bio.uni-potsdam.de/v3.0/fam_mem.php?family_id=NAC
Ghir_A02G010170	NAC	NAM	-	http://plntfdb.bio.uni-potsdam.de/v3.0/fam_mem.php?family_id=NAC
Ghir_A08G024490	NAC	NAM	-	http://plntfdb.bio.uni-potsdam.de/v3.0/fam_mem.php?family_id=NAC
Ghir_A11G016520.1	FAR1	FAR1	-	http://plntfdb.bio.uni-potsdam.de/v3.0/fam_mem.php?family_id=FAR1
Ghir_D04G015260	G2-like	G2-like	Response_reg	http://plntfdb.bio.uni-potsdam.de/v3.0/fam_mem.php?family_id=G2-like
Ghir_D02G004310	AP2-EREBP	AP2	-	http://plntfdb.bio.uni-potsdam.de/v3.0/fam_mem.php?family_id=AP2-EREBP
Ghir_A12G010230	C2H2	zf-C2H2	PHD	http://plntfdb.bio.uni-potsdam.de/v3.0/fam_mem.php?family_id=C2H2
Ghir_A05G001690	AP2-EREBP	AP2	-	http://plntfdb.bio.uni-potsdam.de/v3.0/fam_mem.php?family_id=AP2-EREBP
BGI_novel_G000775	Alfin-like	Alfin-like	DDT,Homeobox,JmjC,JmjN	http://plntfdb.bio.uni-potsdam.de/v3.0/fam_mem.php?family_id=Alfin-like
Ghir_D10G008580	NAC	NAM	-	http://plntfdb.bio.uni-potsdam.de/v3.0/fam_mem.php?family_id=NAC
Ghir_D03G016870	GRAS	GRAS	-	http://plntfdb.bio.uni-potsdam.de/v3.0/fam_mem.php?family_id=GRAS
Ghir_D10G018030.2	C3H	zf-CCCH	PHD,SNF2_N,zf-C2H2	http://plntfdb.bio.uni-potsdam.de/v3.0/fam_mem.php?family_id=C3H
Ghir_D13G017770	MYB	Myb_DNA-binding	ARID,Response_reg,SNF2_N	http://plntfdb.bio.uni-potsdam.de/v3.0/fam_mem.php?family_id=MYB
Ghir_A07G018540	SAP	STER_AP	-	http://plntfdb.bio.uni-potsdam.de/v3.0/fam_mem.php?family_id=SAP
Ghir_A12G014110	C3H	zf-CCCH	PHD,SNF2_N,zf-C2H2	http://plntfdb.bio.uni-potsdam.de/v3.0/fam_mem.php?family_id=C3H
Ghir_D08G020650	WRKY	WRKY	-	http://plntfdb.bio.uni-potsdam.de/v3.0/fam_mem.php?family_id=WRKY
Ghir_A06G007220	NAC	NAM	-	http://plntfdb.bio.uni-potsdam.de/v3.0/fam_mem.php?family_id=NAC
Ghir_A11G010160	AP2-EREBP	AP2	-	http://plntfdb.bio.uni-potsdam.de/v3.0/fam_mem.php?family_id=AP2-EREBP
Ghir_A04G005030	NAC	NAM	-	http://plntfdb.bio.uni-potsdam.de/v3.0/fam_mem.php?family_id=NAC
Ghir_D07G021330	FAR1	FAR1	-	http://plntfdb.bio.uni-potsdam.de/v3.0/fam_mem.php?family_id=FAR1
Ghir_D10G022230.1	NAC	NAM	-	http://plntfdb.bio.uni-potsdam.de/v3.0/fam_mem.php?family_id=NAC
Ghir_A13G012380	MADS	SRF-TF	-	http://plntfdb.bio.uni-potsdam.de/v3.0/fam_mem.php?family_id=MADS
Ghir_A10G008790	GRF	QLQ,WRC	-	http://plntfdb.bio.uni-potsdam.de/v3.0/fam_mem.php?family_id=GRF
Ghir_D11G027400	AP2-EREBP	AP2	-	http://plntfdb.bio.uni-potsdam.de/v3.0/fam_mem.php?family_id=AP2-EREBP
Ghir_A07G023870	MYB	Myb_DNA-binding	ARID,Response_reg,SNF2_N	http://plntfdb.bio.uni-potsdam.de/v3.0/fam_mem.php?family_id=MYB
Ghir_A06G022520	FHA	FHA	-	http://plntfdb.bio.uni-potsdam.de/v3.0/fam_mem.php?family_id=FHA
Ghir_A01G019040	C2H2	zf-C2H2	PHD	http://plntfdb.bio.uni-potsdam.de/v3.0/fam_mem.php?family_id=C2H2
Ghir_A13G015120	NAC	NAM	-	http://plntfdb.bio.uni-potsdam.de/v3.0/fam_mem.php?family_id=NAC
Ghir_A05G016910	MYB	Myb_DNA-binding	ARID,Response_reg,SNF2_N	http://plntfdb.bio.uni-potsdam.de/v3.0/fam_mem.php?family_id=MYB
Ghir_A09G013350	AP2-EREBP	AP2	-	http://plntfdb.bio.uni-potsdam.de/v3.0/fam_mem.php?family_id=AP2-EREBP
Ghir_D11G020050	ABI3VP1	B3	AP2,Auxin_resp	http://plntfdb.bio.uni-potsdam.de/v3.0/fam_mem.php?family_id=ABI3VP1
Ghir_D11G012540	TUB	Tub	-	http://plntfdb.bio.uni-potsdam.de/v3.0/fam_mem.php?family_id=TUB
Ghir_A12G015080	NAC	NAM	-	http://plntfdb.bio.uni-potsdam.de/v3.0/fam_mem.php?family_id=NAC
Ghir_D05G032530	C3H	zf-CCCH	PHD,SNF2_N,zf-C2H2	http://plntfdb.bio.uni-potsdam.de/v3.0/fam_mem.php?family_id=C3H
Ghir_D06G003040.1	C2C2-GATA	GATA	-	http://plntfdb.bio.uni-potsdam.de/v3.0/fam_mem.php?family_id=C2C2-GATA
Ghir_A13G005190	C2H2	zf-C2H2	PHD	http://plntfdb.bio.uni-potsdam.de/v3.0/fam_mem.php?family_id=C2H2
Ghir_A13G003170	mTERF	mTERF	-	http://plntfdb.bio.uni-potsdam.de/v3.0/fam_mem.php?family_id=mTERF
Ghir_A12G017660	bHLH	HLH	-	http://plntfdb.bio.uni-potsdam.de/v3.0/fam_mem.php?family_id=bHLH
Ghir_D06G014710	NAC	NAM	-	http://plntfdb.bio.uni-potsdam.de/v3.0/fam_mem.php?family_id=NAC
Ghir_A03G005350	G2-like	G2-like	Response_reg	http://plntfdb.bio.uni-potsdam.de/v3.0/fam_mem.php?family_id=G2-like
Ghir_D02G019370	C2C2-CO-like	CCT,zf-B_box	GATA,PLATZ	http://plntfdb.bio.uni-potsdam.de/v3.0/fam_mem.php?family_id=C2C2-CO-like
Ghir_D13G025020	EIL	EIN3	-	http://plntfdb.bio.uni-potsdam.de/v3.0/fam_mem.php?family_id=EIL
Ghir_A09G025990.1	C2H2	zf-C2H2	PHD	http://plntfdb.bio.uni-potsdam.de/v3.0/fam_mem.php?family_id=C2H2
Ghir_A12G015250	TCP	TCP	-	http://plntfdb.bio.uni-potsdam.de/v3.0/fam_mem.php?family_id=TCP
Ghir_D04G019960.1	SBP	SBP	-	http://plntfdb.bio.uni-potsdam.de/v3.0/fam_mem.php?family_id=SBP
Ghir_D08G015660	Trihelix	trihelix	-	http://plntfdb.bio.uni-potsdam.de/v3.0/fam_mem.php?family_id=Trihelix
Ghir_A09G003510	C3H	zf-CCCH	PHD,SNF2_N,zf-C2H2	http://plntfdb.bio.uni-potsdam.de/v3.0/fam_mem.php?family_id=C3H
Ghir_A04G016090	AP2-EREBP	AP2	-	http://plntfdb.bio.uni-potsdam.de/v3.0/fam_mem.php?family_id=AP2-EREBP
Ghir_D03G002040	MYB	Myb_DNA-binding	ARID,Response_reg,SNF2_N	http://plntfdb.bio.uni-potsdam.de/v3.0/fam_mem.php?family_id=MYB
Ghir_D05G026860.1	AP2-EREBP	AP2	-	http://plntfdb.bio.uni-potsdam.de/v3.0/fam_mem.php?family_id=AP2-EREBP
Ghir_A08G026050	RWP-RK	RWP-RK	-	http://plntfdb.bio.uni-potsdam.de/v3.0/fam_mem.php?family_id=RWP-RK
Ghir_A02G015090	WRKY	WRKY	-	http://plntfdb.bio.uni-potsdam.de/v3.0/fam_mem.php?family_id=WRKY
Ghir_D01G021090	OFP	Ovate	-	http://plntfdb.bio.uni-potsdam.de/v3.0/fam_mem.php?family_id=OFP
Ghir_A05G041810	AP2-EREBP	AP2	-	http://plntfdb.bio.uni-potsdam.de/v3.0/fam_mem.php?family_id=AP2-EREBP
BGI_novel_G000323	GRAS	GRAS	-	http://plntfdb.bio.uni-potsdam.de/v3.0/fam_mem.php?family_id=GRAS
Ghir_D08G005850	MYB	Myb_DNA-binding	ARID,Response_reg,SNF2_N	http://plntfdb.bio.uni-potsdam.de/v3.0/fam_mem.php?family_id=MYB
Ghir_A01G010000	ARF	Auxin_resp	-	http://plntfdb.bio.uni-potsdam.de/v3.0/fam_mem.php?family_id=ARF
Ghir_A02G000770.1	TAZ	zf-TAZ	PHD	http://plntfdb.bio.uni-potsdam.de/v3.0/fam_mem.php?family_id=TAZ
Ghir_A03G000280.1	bZIP	bZIP_1,bZIP_2,bZIP_Maf	HLH	http://plntfdb.bio.uni-potsdam.de/v3.0/fam_mem.php?family_id=bZIP
Ghir_D05G013560	C2C2-Dof	zf-Dof	-	http://plntfdb.bio.uni-potsdam.de/v3.0/fam_mem.php?family_id=C2C2-Dof
Ghir_A06G003180	MADS	SRF-TF	-	http://plntfdb.bio.uni-potsdam.de/v3.0/fam_mem.php?family_id=MADS
Ghir_D04G016120	MYB	Myb_DNA-binding	ARID,Response_reg,SNF2_N	http://plntfdb.bio.uni-potsdam.de/v3.0/fam_mem.php?family_id=MYB
Ghir_D08G020590.1	C3H	zf-CCCH	PHD,SNF2_N,zf-C2H2	http://plntfdb.bio.uni-potsdam.de/v3.0/fam_mem.php?family_id=C3H
Ghir_D08G027280	ARR-B	G2-like,Myb_DNA-binding,Response_reg	CCT	http://plntfdb.bio.uni-potsdam.de/v3.0/fam_mem.php?family_id=ARR-B
Ghir_D06G001810	AP2-EREBP	AP2	-	http://plntfdb.bio.uni-potsdam.de/v3.0/fam_mem.php?family_id=AP2-EREBP
Ghir_D13G025760	mTERF	mTERF	-	http://plntfdb.bio.uni-potsdam.de/v3.0/fam_mem.php?family_id=mTERF
Ghir_A06G008380	ARF	Auxin_resp	-	http://plntfdb.bio.uni-potsdam.de/v3.0/fam_mem.php?family_id=ARF
Ghir_A05G003160	HSF	HSF_DNA-bind	-	http://plntfdb.bio.uni-potsdam.de/v3.0/fam_mem.php?family_id=HSF
Ghir_A12G012390	bHLH	HLH	-	http://plntfdb.bio.uni-potsdam.de/v3.0/fam_mem.php?family_id=bHLH
Ghir_A08G002790	C2C2-CO-like	CCT,zf-B_box	GATA,PLATZ	http://plntfdb.bio.uni-potsdam.de/v3.0/fam_mem.php?family_id=C2C2-CO-like
Ghir_D11G001180	GRAS	GRAS	-	http://plntfdb.bio.uni-potsdam.de/v3.0/fam_mem.php?family_id=GRAS
Ghir_D10G002170	bHLH	HLH	-	http://plntfdb.bio.uni-potsdam.de/v3.0/fam_mem.php?family_id=bHLH
Ghir_A01G004470	BES1	DUF822	-	http://plntfdb.bio.uni-potsdam.de/v3.0/fam_mem.php?family_id=BES1
Ghir_D07G012950.2	SRS	DUF702	-	http://plntfdb.bio.uni-potsdam.de/v3.0/fam_mem.php?family_id=SRS
Ghir_A07G007370	MADS	SRF-TF	-	http://plntfdb.bio.uni-potsdam.de/v3.0/fam_mem.php?family_id=MADS
Ghir_D10G016930	MADS	SRF-TF	-	http://plntfdb.bio.uni-potsdam.de/v3.0/fam_mem.php?family_id=MADS
Ghir_D05G026680	MYB	Myb_DNA-binding	ARID,Response_reg,SNF2_N	http://plntfdb.bio.uni-potsdam.de/v3.0/fam_mem.php?family_id=MYB
Ghir_A11G004920.1	TUB	Tub	-	http://plntfdb.bio.uni-potsdam.de/v3.0/fam_mem.php?family_id=TUB
Ghir_D04G003500	NAC	NAM	-	http://plntfdb.bio.uni-potsdam.de/v3.0/fam_mem.php?family_id=NAC
Ghir_A11G000680	TCP	TCP	-	http://plntfdb.bio.uni-potsdam.de/v3.0/fam_mem.php?family_id=TCP
Ghir_D13G001410	C3H	zf-CCCH	PHD,SNF2_N,zf-C2H2	http://plntfdb.bio.uni-potsdam.de/v3.0/fam_mem.php?family_id=C3H
Ghir_A12G028470	MYB	Myb_DNA-binding	ARID,Response_reg,SNF2_N	http://plntfdb.bio.uni-potsdam.de/v3.0/fam_mem.php?family_id=MYB
Ghir_D05G025680	AP2-EREBP	AP2	-	http://plntfdb.bio.uni-potsdam.de/v3.0/fam_mem.php?family_id=AP2-EREBP
Ghir_D12G023830	AP2-EREBP	AP2	-	http://plntfdb.bio.uni-potsdam.de/v3.0/fam_mem.php?family_id=AP2-EREBP
Ghir_A05G001230	HB	Homeobox,KNOX1,KNOX2	-	http://plntfdb.bio.uni-potsdam.de/v3.0/fam_mem.php?family_id=HB
Ghir_D11G003280	bHLH	HLH	-	http://plntfdb.bio.uni-potsdam.de/v3.0/fam_mem.php?family_id=bHLH
Ghir_A13G007410	TCP	TCP	-	http://plntfdb.bio.uni-potsdam.de/v3.0/fam_mem.php?family_id=TCP
Ghir_A11G033260	LOB	DUF260	-	http://plntfdb.bio.uni-potsdam.de/v3.0/fam_mem.php?family_id=LOB
Ghir_D12G016630	C2H2	zf-C2H2	PHD	http://plntfdb.bio.uni-potsdam.de/v3.0/fam_mem.php?family_id=C2H2
Ghir_D05G028590	LOB	DUF260	-	http://plntfdb.bio.uni-potsdam.de/v3.0/fam_mem.php?family_id=LOB
Ghir_D08G027100	C2C2-GATA	GATA	-	http://plntfdb.bio.uni-potsdam.de/v3.0/fam_mem.php?family_id=C2C2-GATA
Ghir_D07G012850	C2H2	zf-C2H2	PHD	http://plntfdb.bio.uni-potsdam.de/v3.0/fam_mem.php?family_id=C2H2
Ghir_D04G020770	C2C2-Dof	zf-Dof	-	http://plntfdb.bio.uni-potsdam.de/v3.0/fam_mem.php?family_id=C2C2-Dof
Ghir_A06G017700	LIM	LIM	-	http://plntfdb.bio.uni-potsdam.de/v3.0/fam_mem.php?family_id=LIM
Ghir_A05G041420	LOB	DUF260	-	http://plntfdb.bio.uni-potsdam.de/v3.0/fam_mem.php?family_id=LOB
Ghir_D02G024660	ABI3VP1	B3	AP2,Auxin_resp	http://plntfdb.bio.uni-potsdam.de/v3.0/fam_mem.php?family_id=ABI3VP1
Ghir_A08G007530	BSD	BSD	-	http://plntfdb.bio.uni-potsdam.de/v3.0/fam_mem.php?family_id=BSD
Ghir_A06G014700	WRKY	WRKY	-	http://plntfdb.bio.uni-potsdam.de/v3.0/fam_mem.php?family_id=WRKY
Ghir_A03G005210	GRAS	GRAS	-	http://plntfdb.bio.uni-potsdam.de/v3.0/fam_mem.php?family_id=GRAS
Ghir_A05G012300	WRKY	WRKY	-	http://plntfdb.bio.uni-potsdam.de/v3.0/fam_mem.php?family_id=WRKY
Ghir_D05G027470	MYB	Myb_DNA-binding	ARID,Response_reg,SNF2_N	http://plntfdb.bio.uni-potsdam.de/v3.0/fam_mem.php?family_id=MYB
Ghir_A07G008440	MYB	Myb_DNA-binding	ARID,Response_reg,SNF2_N	http://plntfdb.bio.uni-potsdam.de/v3.0/fam_mem.php?family_id=MYB
Ghir_A10G022900	LIM	LIM	-	http://plntfdb.bio.uni-potsdam.de/v3.0/fam_mem.php?family_id=LIM
Ghir_D05G010340	ARF	Auxin_resp	-	http://plntfdb.bio.uni-potsdam.de/v3.0/fam_mem.php?family_id=ARF
Ghir_D12G000840	C2C2-CO-like	CCT,zf-B_box	GATA,PLATZ	http://plntfdb.bio.uni-potsdam.de/v3.0/fam_mem.php?family_id=C2C2-CO-like
Ghir_D03G009930	MYB	Myb_DNA-binding	ARID,Response_reg,SNF2_N	http://plntfdb.bio.uni-potsdam.de/v3.0/fam_mem.php?family_id=MYB
Ghir_D05G020770	bZIP	bZIP_1,bZIP_2,bZIP_Maf	HLH	http://plntfdb.bio.uni-potsdam.de/v3.0/fam_mem.php?family_id=bZIP
Ghir_A06G017870	GRAS	GRAS	-	http://plntfdb.bio.uni-potsdam.de/v3.0/fam_mem.php?family_id=GRAS
Ghir_D01G009680.2	SBP	SBP	-	http://plntfdb.bio.uni-potsdam.de/v3.0/fam_mem.php?family_id=SBP
Ghir_A12G007040	ABI3VP1	B3	AP2,Auxin_resp	http://plntfdb.bio.uni-potsdam.de/v3.0/fam_mem.php?family_id=ABI3VP1
Ghir_A09G024580	FAR1	FAR1	-	http://plntfdb.bio.uni-potsdam.de/v3.0/fam_mem.php?family_id=FAR1
Ghir_D05G006190	WRKY	WRKY	-	http://plntfdb.bio.uni-potsdam.de/v3.0/fam_mem.php?family_id=WRKY
Ghir_D12G017880	bHLH	HLH	-	http://plntfdb.bio.uni-potsdam.de/v3.0/fam_mem.php?family_id=bHLH
Ghir_D13G013680	MYB	Myb_DNA-binding	ARID,Response_reg,SNF2_N	http://plntfdb.bio.uni-potsdam.de/v3.0/fam_mem.php?family_id=MYB
Ghir_D02G013400	C2C2-YABBY	YABBY	-	http://plntfdb.bio.uni-potsdam.de/v3.0/fam_mem.php?family_id=C2C2-YABBY
Ghir_D12G000240.1	Tify	tify	GATA	http://plntfdb.bio.uni-potsdam.de/v3.0/fam_mem.php?family_id=Tify
Ghir_D06G018800	GRAS	GRAS	-	http://plntfdb.bio.uni-potsdam.de/v3.0/fam_mem.php?family_id=GRAS
Ghir_A07G004140	C2C2-YABBY	YABBY	-	http://plntfdb.bio.uni-potsdam.de/v3.0/fam_mem.php?family_id=C2C2-YABBY
Ghir_D04G015810	MYB	Myb_DNA-binding	ARID,Response_reg,SNF2_N	http://plntfdb.bio.uni-potsdam.de/v3.0/fam_mem.php?family_id=MYB
Ghir_D10G026800	AP2-EREBP	AP2	-	http://plntfdb.bio.uni-potsdam.de/v3.0/fam_mem.php?family_id=AP2-EREBP
Ghir_A05G020480	MYB	Myb_DNA-binding	ARID,Response_reg,SNF2_N	http://plntfdb.bio.uni-potsdam.de/v3.0/fam_mem.php?family_id=MYB
Ghir_D12G005230	ARR-B	G2-like,Myb_DNA-binding,Response_reg	CCT	http://plntfdb.bio.uni-potsdam.de/v3.0/fam_mem.php?family_id=ARR-B
Ghir_D05G034010	NAC	NAM	-	http://plntfdb.bio.uni-potsdam.de/v3.0/fam_mem.php?family_id=NAC
Ghir_A03G001960	HB	Homeobox,KNOX1,KNOX2	-	http://plntfdb.bio.uni-potsdam.de/v3.0/fam_mem.php?family_id=HB
Ghir_D07G012230.1	C2C2-YABBY	YABBY	-	http://plntfdb.bio.uni-potsdam.de/v3.0/fam_mem.php?family_id=C2C2-YABBY
Ghir_D08G001770	AP2-EREBP	AP2	-	http://plntfdb.bio.uni-potsdam.de/v3.0/fam_mem.php?family_id=AP2-EREBP
Ghir_D11G003460	bHLH	HLH	-	http://plntfdb.bio.uni-potsdam.de/v3.0/fam_mem.php?family_id=bHLH
Ghir_A11G010110	bZIP	bZIP_1,bZIP_2,bZIP_Maf	HLH	http://plntfdb.bio.uni-potsdam.de/v3.0/fam_mem.php?family_id=bZIP
Ghir_D01G014820	BBR/BPC	GAGA_bind	-	http://plntfdb.bio.uni-potsdam.de/v3.0/fam_mem.php?family_id=BBR/BPC
Ghir_D11G015920.3	C3H	zf-CCCH	PHD,SNF2_N,zf-C2H2	http://plntfdb.bio.uni-potsdam.de/v3.0/fam_mem.php?family_id=C3H
Ghir_D08G009330	C2C2-CO-like	CCT,zf-B_box	GATA,PLATZ	http://plntfdb.bio.uni-potsdam.de/v3.0/fam_mem.php?family_id=C2C2-CO-like
Ghir_D08G021580	MADS	SRF-TF	-	http://plntfdb.bio.uni-potsdam.de/v3.0/fam_mem.php?family_id=MADS
Ghir_D09G001260	AP2-EREBP	AP2	-	http://plntfdb.bio.uni-potsdam.de/v3.0/fam_mem.php?family_id=AP2-EREBP
Ghir_D08G014730	MYB	Myb_DNA-binding	ARID,Response_reg,SNF2_N	http://plntfdb.bio.uni-potsdam.de/v3.0/fam_mem.php?family_id=MYB
Ghir_D09G014630	Trihelix	trihelix	-	http://plntfdb.bio.uni-potsdam.de/v3.0/fam_mem.php?family_id=Trihelix
Ghir_D11G033570	Sigma70-like	Sigma70_r2,Sigma70_r3,Sigma70_r4	-	http://plntfdb.bio.uni-potsdam.de/v3.0/fam_mem.php?family_id=Sigma70-like
Ghir_D04G006960	NAC	NAM	-	http://plntfdb.bio.uni-potsdam.de/v3.0/fam_mem.php?family_id=NAC
Ghir_A10G005860	C2C2-Dof	zf-Dof	-	http://plntfdb.bio.uni-potsdam.de/v3.0/fam_mem.php?family_id=C2C2-Dof
Ghir_A11G008220	AP2-EREBP	AP2	-	http://plntfdb.bio.uni-potsdam.de/v3.0/fam_mem.php?family_id=AP2-EREBP
Ghir_A02G000490	OFP	Ovate	-	http://plntfdb.bio.uni-potsdam.de/v3.0/fam_mem.php?family_id=OFP
Ghir_D11G019050	SRS	DUF702	-	http://plntfdb.bio.uni-potsdam.de/v3.0/fam_mem.php?family_id=SRS
Ghir_D03G014920	ARF	Auxin_resp	-	http://plntfdb.bio.uni-potsdam.de/v3.0/fam_mem.php?family_id=ARF
Ghir_D02G005180	MYB	Myb_DNA-binding	ARID,Response_reg,SNF2_N	http://plntfdb.bio.uni-potsdam.de/v3.0/fam_mem.php?family_id=MYB
Ghir_A11G007190	MYB	Myb_DNA-binding	ARID,Response_reg,SNF2_N	http://plntfdb.bio.uni-potsdam.de/v3.0/fam_mem.php?family_id=MYB
Ghir_A08G017570	MYB	Myb_DNA-binding	ARID,Response_reg,SNF2_N	http://plntfdb.bio.uni-potsdam.de/v3.0/fam_mem.php?family_id=MYB
Ghir_A09G018180	C2H2	zf-C2H2	PHD	http://plntfdb.bio.uni-potsdam.de/v3.0/fam_mem.php?family_id=C2H2
Ghir_D09G009530	C3H	zf-CCCH	PHD,SNF2_N,zf-C2H2	http://plntfdb.bio.uni-potsdam.de/v3.0/fam_mem.php?family_id=C3H
Ghir_A13G024370	ARF	Auxin_resp	-	http://plntfdb.bio.uni-potsdam.de/v3.0/fam_mem.php?family_id=ARF
Ghir_D08G027380	ARR-B	G2-like,Myb_DNA-binding,Response_reg	CCT	http://plntfdb.bio.uni-potsdam.de/v3.0/fam_mem.php?family_id=ARR-B
Ghir_D05G025820	LOB	DUF260	-	http://plntfdb.bio.uni-potsdam.de/v3.0/fam_mem.php?family_id=LOB
Ghir_A13G024880	OFP	Ovate	-	http://plntfdb.bio.uni-potsdam.de/v3.0/fam_mem.php?family_id=OFP
Ghir_D05G026150	MADS	SRF-TF	-	http://plntfdb.bio.uni-potsdam.de/v3.0/fam_mem.php?family_id=MADS
Ghir_A07G012380	LOB	DUF260	-	http://plntfdb.bio.uni-potsdam.de/v3.0/fam_mem.php?family_id=LOB
Ghir_A05G012650	C2H2	zf-C2H2	PHD	http://plntfdb.bio.uni-potsdam.de/v3.0/fam_mem.php?family_id=C2H2
Ghir_D03G003280	bHLH	HLH	-	http://plntfdb.bio.uni-potsdam.de/v3.0/fam_mem.php?family_id=bHLH
Ghir_A09G011160	MYB	Myb_DNA-binding	ARID,Response_reg,SNF2_N	http://plntfdb.bio.uni-potsdam.de/v3.0/fam_mem.php?family_id=MYB
Ghir_A06G004460	AP2-EREBP	AP2	-	http://plntfdb.bio.uni-potsdam.de/v3.0/fam_mem.php?family_id=AP2-EREBP
Ghir_A05G001610	C2C2-YABBY	YABBY	-	http://plntfdb.bio.uni-potsdam.de/v3.0/fam_mem.php?family_id=C2C2-YABBY
Ghir_A12G019530	bZIP	bZIP_1,bZIP_2,bZIP_Maf	HLH	http://plntfdb.bio.uni-potsdam.de/v3.0/fam_mem.php?family_id=bZIP
Ghir_D11G014170	G2-like	G2-like	Response_reg	http://plntfdb.bio.uni-potsdam.de/v3.0/fam_mem.php?family_id=G2-like
Ghir_D07G002090	MYB	Myb_DNA-binding	ARID,Response_reg,SNF2_N	http://plntfdb.bio.uni-potsdam.de/v3.0/fam_mem.php?family_id=MYB
Ghir_D12G023910	HSF	HSF_DNA-bind	-	http://plntfdb.bio.uni-potsdam.de/v3.0/fam_mem.php?family_id=HSF
Ghir_D13G005720	NAC	NAM	-	http://plntfdb.bio.uni-potsdam.de/v3.0/fam_mem.php?family_id=NAC
Ghir_D03G017410	MYB	Myb_DNA-binding	ARID,Response_reg,SNF2_N	http://plntfdb.bio.uni-potsdam.de/v3.0/fam_mem.php?family_id=MYB
Ghir_D08G025210	NAC	NAM	-	http://plntfdb.bio.uni-potsdam.de/v3.0/fam_mem.php?family_id=NAC
Ghir_D12G016930	MYB	Myb_DNA-binding	ARID,Response_reg,SNF2_N	http://plntfdb.bio.uni-potsdam.de/v3.0/fam_mem.php?family_id=MYB
Ghir_D13G020150	HB	Homeobox,KNOX1,KNOX2	-	http://plntfdb.bio.uni-potsdam.de/v3.0/fam_mem.php?family_id=HB
Ghir_D13G024920	MYB	Myb_DNA-binding	ARID,Response_reg,SNF2_N	http://plntfdb.bio.uni-potsdam.de/v3.0/fam_mem.php?family_id=MYB
Ghir_A02G018580	NAC	NAM	-	http://plntfdb.bio.uni-potsdam.de/v3.0/fam_mem.php?family_id=NAC
Ghir_A05G003010	MYB	Myb_DNA-binding	ARID,Response_reg,SNF2_N	http://plntfdb.bio.uni-potsdam.de/v3.0/fam_mem.php?family_id=MYB
Ghir_A10G016570.1	C3H	zf-CCCH	PHD,SNF2_N,zf-C2H2	http://plntfdb.bio.uni-potsdam.de/v3.0/fam_mem.php?family_id=C3H
Ghir_D06G003610	C2H2	zf-C2H2	PHD	http://plntfdb.bio.uni-potsdam.de/v3.0/fam_mem.php?family_id=C2H2
Ghir_A05G020350	ABI3VP1	B3	AP2,Auxin_resp	http://plntfdb.bio.uni-potsdam.de/v3.0/fam_mem.php?family_id=ABI3VP1
Ghir_D10G016760	MYB	Myb_DNA-binding	ARID,Response_reg,SNF2_N	http://plntfdb.bio.uni-potsdam.de/v3.0/fam_mem.php?family_id=MYB
Ghir_D06G013210	NAC	NAM	-	http://plntfdb.bio.uni-potsdam.de/v3.0/fam_mem.php?family_id=NAC
Ghir_A06G008380.1	ARF	Auxin_resp	-	http://plntfdb.bio.uni-potsdam.de/v3.0/fam_mem.php?family_id=ARF
Ghir_D05G003200.1	C2C2-GATA	GATA	-	http://plntfdb.bio.uni-potsdam.de/v3.0/fam_mem.php?family_id=C2C2-GATA
Ghir_A12G015890.2	Trihelix	trihelix	-	http://plntfdb.bio.uni-potsdam.de/v3.0/fam_mem.php?family_id=Trihelix
Ghir_A12G003050	MADS	SRF-TF	-	http://plntfdb.bio.uni-potsdam.de/v3.0/fam_mem.php?family_id=MADS
Ghir_A01G000610	ABI3VP1	B3	AP2,Auxin_resp	http://plntfdb.bio.uni-potsdam.de/v3.0/fam_mem.php?family_id=ABI3VP1
Ghir_A07G001320	MYB	Myb_DNA-binding	ARID,Response_reg,SNF2_N	http://plntfdb.bio.uni-potsdam.de/v3.0/fam_mem.php?family_id=MYB
Ghir_A01G009090	GRAS	GRAS	-	http://plntfdb.bio.uni-potsdam.de/v3.0/fam_mem.php?family_id=GRAS
Ghir_D02G019340	MADS	SRF-TF	-	http://plntfdb.bio.uni-potsdam.de/v3.0/fam_mem.php?family_id=MADS
Ghir_D11G008580	PLATZ	PLATZ	-	http://plntfdb.bio.uni-potsdam.de/v3.0/fam_mem.php?family_id=PLATZ
Ghir_D02G013430	MADS	SRF-TF	-	http://plntfdb.bio.uni-potsdam.de/v3.0/fam_mem.php?family_id=MADS
Ghir_D12G002580	G2-like	G2-like	Response_reg	http://plntfdb.bio.uni-potsdam.de/v3.0/fam_mem.php?family_id=G2-like
Ghir_D02G009610	BES1	DUF822	-	http://plntfdb.bio.uni-potsdam.de/v3.0/fam_mem.php?family_id=BES1
Ghir_D07G011270	C2H2	zf-C2H2	PHD	http://plntfdb.bio.uni-potsdam.de/v3.0/fam_mem.php?family_id=C2H2
Ghir_D03G003280.1	bHLH	HLH	-	http://plntfdb.bio.uni-potsdam.de/v3.0/fam_mem.php?family_id=bHLH
Ghir_A12G010270	bHLH	HLH	-	http://plntfdb.bio.uni-potsdam.de/v3.0/fam_mem.php?family_id=bHLH
Ghir_A09G013390	bHLH	HLH	-	http://plntfdb.bio.uni-potsdam.de/v3.0/fam_mem.php?family_id=bHLH
Ghir_D12G019820	WRKY	WRKY	-	http://plntfdb.bio.uni-potsdam.de/v3.0/fam_mem.php?family_id=WRKY
Ghir_D04G011870	C2H2	zf-C2H2	PHD	http://plntfdb.bio.uni-potsdam.de/v3.0/fam_mem.php?family_id=C2H2
Ghir_A07G003250	AP2-EREBP	AP2	-	http://plntfdb.bio.uni-potsdam.de/v3.0/fam_mem.php?family_id=AP2-EREBP
Ghir_A12G020860	AP2-EREBP	AP2	-	http://plntfdb.bio.uni-potsdam.de/v3.0/fam_mem.php?family_id=AP2-EREBP
Ghir_A11G008460	bHLH	HLH	-	http://plntfdb.bio.uni-potsdam.de/v3.0/fam_mem.php?family_id=bHLH
Ghir_D01G008180	C3H	zf-CCCH	PHD,SNF2_N,zf-C2H2	http://plntfdb.bio.uni-potsdam.de/v3.0/fam_mem.php?family_id=C3H
Ghir_A05G025550	MADS	SRF-TF	-	http://plntfdb.bio.uni-potsdam.de/v3.0/fam_mem.php?family_id=MADS
Ghir_A11G032910.1	Sigma70-like	Sigma70_r2,Sigma70_r3,Sigma70_r4	-	http://plntfdb.bio.uni-potsdam.de/v3.0/fam_mem.php?family_id=Sigma70-like
Ghir_D09G017650	zf-HD	ZF-HD_dimer	-	http://plntfdb.bio.uni-potsdam.de/v3.0/fam_mem.php?family_id=zf-HD
Ghir_A01G010130	SRS	DUF702	-	http://plntfdb.bio.uni-potsdam.de/v3.0/fam_mem.php?family_id=SRS
Ghir_A12G022030	C3H	zf-CCCH	PHD,SNF2_N,zf-C2H2	http://plntfdb.bio.uni-potsdam.de/v3.0/fam_mem.php?family_id=C3H
Ghir_A13G008340	WRKY	WRKY	-	http://plntfdb.bio.uni-potsdam.de/v3.0/fam_mem.php?family_id=WRKY
Ghir_D05G007500	C2H2	zf-C2H2	PHD	http://plntfdb.bio.uni-potsdam.de/v3.0/fam_mem.php?family_id=C2H2
Ghir_D11G011120	SBP	SBP	-	http://plntfdb.bio.uni-potsdam.de/v3.0/fam_mem.php?family_id=SBP
Ghir_A01G017920	mTERF	mTERF	-	http://plntfdb.bio.uni-potsdam.de/v3.0/fam_mem.php?family_id=mTERF
Ghir_D11G012560	ARF	Auxin_resp	-	http://plntfdb.bio.uni-potsdam.de/v3.0/fam_mem.php?family_id=ARF
Ghir_A10G002380	C2C2-Dof	zf-Dof	-	http://plntfdb.bio.uni-potsdam.de/v3.0/fam_mem.php?family_id=C2C2-Dof
Ghir_D12G022010	HSF	HSF_DNA-bind	-	http://plntfdb.bio.uni-potsdam.de/v3.0/fam_mem.php?family_id=HSF
Ghir_D11G019020	C2C2-GATA	GATA	-	http://plntfdb.bio.uni-potsdam.de/v3.0/fam_mem.php?family_id=C2C2-GATA
Ghir_A09G001450	MYB	Myb_DNA-binding	ARID,Response_reg,SNF2_N	http://plntfdb.bio.uni-potsdam.de/v3.0/fam_mem.php?family_id=MYB
Ghir_D11G033890	bHLH	HLH	-	http://plntfdb.bio.uni-potsdam.de/v3.0/fam_mem.php?family_id=bHLH
Ghir_D11G005390	TAZ	zf-TAZ	PHD	http://plntfdb.bio.uni-potsdam.de/v3.0/fam_mem.php?family_id=TAZ
Ghir_A02G016020.1	AP2-EREBP	AP2	-	http://plntfdb.bio.uni-potsdam.de/v3.0/fam_mem.php?family_id=AP2-EREBP
Ghir_D08G025770	bZIP	bZIP_1,bZIP_2,bZIP_Maf	HLH	http://plntfdb.bio.uni-potsdam.de/v3.0/fam_mem.php?family_id=bZIP
Ghir_D07G009180.1	WRKY	WRKY	-	http://plntfdb.bio.uni-potsdam.de/v3.0/fam_mem.php?family_id=WRKY
Ghir_D13G002050	MYB	Myb_DNA-binding	ARID,Response_reg,SNF2_N	http://plntfdb.bio.uni-potsdam.de/v3.0/fam_mem.php?family_id=MYB
Ghir_A02G015930	AP2-EREBP	AP2	-	http://plntfdb.bio.uni-potsdam.de/v3.0/fam_mem.php?family_id=AP2-EREBP
Ghir_D02G007160.1	bZIP	bZIP_1,bZIP_2,bZIP_Maf	HLH	http://plntfdb.bio.uni-potsdam.de/v3.0/fam_mem.php?family_id=bZIP
Ghir_D09G005210	bHLH	HLH	-	http://plntfdb.bio.uni-potsdam.de/v3.0/fam_mem.php?family_id=bHLH
Ghir_A03G002810	MYB	Myb_DNA-binding	ARID,Response_reg,SNF2_N	http://plntfdb.bio.uni-potsdam.de/v3.0/fam_mem.php?family_id=MYB
Ghir_D07G023080	GRAS	GRAS	-	http://plntfdb.bio.uni-potsdam.de/v3.0/fam_mem.php?family_id=GRAS
Ghir_A11G019960	ABI3VP1	B3	AP2,Auxin_resp	http://plntfdb.bio.uni-potsdam.de/v3.0/fam_mem.php?family_id=ABI3VP1
Ghir_D05G014340.1	AP2-EREBP	AP2	-	http://plntfdb.bio.uni-potsdam.de/v3.0/fam_mem.php?family_id=AP2-EREBP
Ghir_A08G004320	PLATZ	PLATZ	-	http://plntfdb.bio.uni-potsdam.de/v3.0/fam_mem.php?family_id=PLATZ
Ghir_A11G021110	MADS	SRF-TF	-	http://plntfdb.bio.uni-potsdam.de/v3.0/fam_mem.php?family_id=MADS
Ghir_A09G007590	Alfin-like	Alfin-like	DDT,Homeobox,JmjC,JmjN	http://plntfdb.bio.uni-potsdam.de/v3.0/fam_mem.php?family_id=Alfin-like
Ghir_D02G000360	WRKY	WRKY	-	http://plntfdb.bio.uni-potsdam.de/v3.0/fam_mem.php?family_id=WRKY
Ghir_D05G019290	SRS	DUF702	-	http://plntfdb.bio.uni-potsdam.de/v3.0/fam_mem.php?family_id=SRS
Ghir_A11G003670	NAC	NAM	-	http://plntfdb.bio.uni-potsdam.de/v3.0/fam_mem.php?family_id=NAC
Ghir_D09G020910	HSF	HSF_DNA-bind	-	http://plntfdb.bio.uni-potsdam.de/v3.0/fam_mem.php?family_id=HSF
Ghir_D12G019850.1	WRKY	WRKY	-	http://plntfdb.bio.uni-potsdam.de/v3.0/fam_mem.php?family_id=WRKY
Ghir_A05G020130	LIM	LIM	-	http://plntfdb.bio.uni-potsdam.de/v3.0/fam_mem.php?family_id=LIM
Ghir_A02G001210.1	RWP-RK	RWP-RK	-	http://plntfdb.bio.uni-potsdam.de/v3.0/fam_mem.php?family_id=RWP-RK
Ghir_A11G013460	bHLH	HLH	-	http://plntfdb.bio.uni-potsdam.de/v3.0/fam_mem.php?family_id=bHLH
Ghir_D04G015030	bHLH	HLH	-	http://plntfdb.bio.uni-potsdam.de/v3.0/fam_mem.php?family_id=bHLH
Ghir_A03G018890	C3H	zf-CCCH	PHD,SNF2_N,zf-C2H2	http://plntfdb.bio.uni-potsdam.de/v3.0/fam_mem.php?family_id=C3H
Ghir_A03G006890.1	NAC	NAM	-	http://plntfdb.bio.uni-potsdam.de/v3.0/fam_mem.php?family_id=NAC
Ghir_D05G004970	C2C2-GATA	GATA	-	http://plntfdb.bio.uni-potsdam.de/v3.0/fam_mem.php?family_id=C2C2-GATA
Ghir_A06G010240	bHLH	HLH	-	http://plntfdb.bio.uni-potsdam.de/v3.0/fam_mem.php?family_id=bHLH
Ghir_D07G021520	bHLH	HLH	-	http://plntfdb.bio.uni-potsdam.de/v3.0/fam_mem.php?family_id=bHLH
Ghir_A04G004440	C2C2-YABBY	YABBY	-	http://plntfdb.bio.uni-potsdam.de/v3.0/fam_mem.php?family_id=C2C2-YABBY
Ghir_A02G004570	BSD	BSD	-	http://plntfdb.bio.uni-potsdam.de/v3.0/fam_mem.php?family_id=BSD
Ghir_D08G018450	AP2-EREBP	AP2	-	http://plntfdb.bio.uni-potsdam.de/v3.0/fam_mem.php?family_id=AP2-EREBP
Ghir_D05G025720	AP2-EREBP	AP2	-	http://plntfdb.bio.uni-potsdam.de/v3.0/fam_mem.php?family_id=AP2-EREBP
Ghir_A01G012320	C3H	zf-CCCH	PHD,SNF2_N,zf-C2H2	http://plntfdb.bio.uni-potsdam.de/v3.0/fam_mem.php?family_id=C3H
Ghir_A11G003010	NAC	NAM	-	http://plntfdb.bio.uni-potsdam.de/v3.0/fam_mem.php?family_id=NAC
Ghir_D04G005390	AP2-EREBP	AP2	-	http://plntfdb.bio.uni-potsdam.de/v3.0/fam_mem.php?family_id=AP2-EREBP
Ghir_A12G008540	C2H2	zf-C2H2	PHD	http://plntfdb.bio.uni-potsdam.de/v3.0/fam_mem.php?family_id=C2H2
Ghir_A08G025920	Tify	tify	GATA	http://plntfdb.bio.uni-potsdam.de/v3.0/fam_mem.php?family_id=Tify
Ghir_A05G041630.2	WRKY	WRKY	-	http://plntfdb.bio.uni-potsdam.de/v3.0/fam_mem.php?family_id=WRKY
Ghir_D08G024560.1	C3H	zf-CCCH	PHD,SNF2_N,zf-C2H2	http://plntfdb.bio.uni-potsdam.de/v3.0/fam_mem.php?family_id=C3H
Ghir_A10G005120	GRF	QLQ,WRC	-	http://plntfdb.bio.uni-potsdam.de/v3.0/fam_mem.php?family_id=GRF
Ghir_A06G012080.1	AP2-EREBP	AP2	-	http://plntfdb.bio.uni-potsdam.de/v3.0/fam_mem.php?family_id=AP2-EREBP
Ghir_D04G008070	WRKY	WRKY	-	http://plntfdb.bio.uni-potsdam.de/v3.0/fam_mem.php?family_id=WRKY
Ghir_D04G017200	LIM	LIM	-	http://plntfdb.bio.uni-potsdam.de/v3.0/fam_mem.php?family_id=LIM
Ghir_A11G010170	AP2-EREBP	AP2	-	http://plntfdb.bio.uni-potsdam.de/v3.0/fam_mem.php?family_id=AP2-EREBP
Ghir_D09G016780	C2C2-YABBY	YABBY	-	http://plntfdb.bio.uni-potsdam.de/v3.0/fam_mem.php?family_id=C2C2-YABBY
Ghir_A08G006920	C2H2	zf-C2H2	PHD	http://plntfdb.bio.uni-potsdam.de/v3.0/fam_mem.php?family_id=C2H2
Ghir_D13G012860	AP2-EREBP	AP2	-	http://plntfdb.bio.uni-potsdam.de/v3.0/fam_mem.php?family_id=AP2-EREBP
Ghir_D09G019990	AP2-EREBP	AP2	-	http://plntfdb.bio.uni-potsdam.de/v3.0/fam_mem.php?family_id=AP2-EREBP
Ghir_A09G004210	GRAS	GRAS	-	http://plntfdb.bio.uni-potsdam.de/v3.0/fam_mem.php?family_id=GRAS
[truncated: 3,554 more rows]
