# Supplementary material for: Transcriptome Analysis Reveals the Defense Mechanism of Cotton against Verticillium dahliae Induced by Hypovirulent Fungus Gibellulopsis nigrescens CEF08111
Source: Int J Mol Sci. 2023 Jan 12;24(2):1480. doi: 10.3390/ijms24021480 (PMC9863408; doi:10.3390/ijms24021480)
Supplement: Supplementary file 1 [file ijms-24-01480-s001.zip › Table S4.xlsx]

## Sheet: TS4
Query ID	Subject ID	Identity	Align Length	Mismatch	Gap	Query Start	Query End	Subject Start	Subject End	Evalue	Score	Name	Type	Species	Domain Class	GeneBank ID	GeneBank Locus	Description
BGI_novel_G000017	PRGDB00152804	45.5	897	453	15	270	2891	1	884	2.4e-204	712.2	orange1.1g035887m	Putative_R-Genes,_predicted_from_Pythozome	Citrus sinensis	CNL			Disease resistance protein (CC-NBS-LRR class) family (best arabidopsis hit)
BGI_novel_G000063	PRGDB00158506	59	100	41	0	966	1265	83	182	1.1e-24	114.8	orange1.1g039290m	Putative_R-Genes,_predicted_from_Pythozome	Citrus sinensis	RLP			Leucine-rich repeat protein kinase family protein (best arabidopsis hit)
BGI_novel_G000064	PRGDB00158506	59	100	41	0	1039	1338	83	182	1.2e-24	114.8	orange1.1g039290m	Putative_R-Genes,_predicted_from_Pythozome	Citrus sinensis	RLP			Leucine-rich repeat protein kinase family protein (best arabidopsis hit)
BGI_novel_G000065	PRGDB00077464	44.8	125	62	2	1901	2254	1067	1191	3.2e-21	103.6	Ta.3983	Putative_R-Genes,_predicted_from_NCBI_UniGene	Triticum aestivum	RLP	241988090	AK335347	Triticum aestivum cDNA, clone: WT012_K21, cultivar: Chinese Spring
BGI_novel_G000100	PRGDB00206822	33.3	132	82	1	1069	674	963	1088	4e-12	72.4	LOC_Os10g07574.1	Putative_R-Genes,_predicted_from_Pythozome	Oryza sativa	NL
BGI_novel_G000122	PRGDB00184271	87.2	47	5	1	378	518	662	707	4.4e-17	89.4	GRMZM2G162531_T01	Putative_R-Genes,_predicted_from_Pythozome	Zea mays	RLP			STRUBBELIG-receptor family 8 (best arabidopsis hit); STRUBBELIG-RECEPTOR FAMILY 7 precursor, putative, expressed (best rice hit)
BGI_novel_G000279	PRGDB00215267	72.5	91	11	1	600	830	30	120	2.4e-28	127.1	MDP0000256952	Putative_R-Genes,_predicted_from_Pythozome	Malus x domestica	RLP
BGI_novel_G000303	PRGDB00163215	73.5	351	91	2	1039	2085	331	681	9.3e-142	503.8	Egrandis_v1_0.004936m	Putative_R-Genes,_predicted_from_Pythozome	Areca catechu	RLP			transmembrane kinase-like 1 (best arabidopsis hit)
BGI_novel_G000306	PRGDB00167710	82.2	393	68	1	94	1272	878	1268	6.7e-180	630.6	Medtr2g047020.1	Putative_R-Genes,_predicted_from_Pythozome	Medicago truncatula	TNL			heat shock cognate protein 70-1 (best arabidopsis hit)
BGI_novel_G000313	PRGDB00165376	30.4	79	50	2	3412	3648	876	949	3.1	35	cassava4.1_034199m	Putative_R-Genes,_predicted_from_Pythozome	Vitis aestivalis	CNL			NB-ARC domain-containing disease resistance protein (best arabidopsis hit)
BGI_novel_G000316	PRGDB00165376	30.4	79	50	2	3377	3613	876	949	2.8	35	cassava4.1_034199m	Putative_R-Genes,_predicted_from_Pythozome	Vitis aestivalis	CNL			NB-ARC domain-containing disease resistance protein (best arabidopsis hit)
BGI_novel_G000389	PRGDB00215267	88.6	44	5	0	238	369	44	87	2.6e-15	83.2	MDP0000256952	Putative_R-Genes,_predicted_from_Pythozome	Malus x domestica	RLP
BGI_novel_G000430	PRGDB00215267	35.8	193	120	3	2387	2959	704	894	5.4e-24	113.6	MDP0000256952	Putative_R-Genes,_predicted_from_Pythozome	Malus x domestica	RLP
BGI_novel_G000480	PRGDB00192523	43.8	48	26	1	934	1074	4	51	0.56	35.8	Mtr.24619	Putative_R-Genes,_predicted_from_NCBI_UniGene	Medicago truncatula	RLP	357513572	XM_003627027	Medicago truncatula Receptor-like protein kinase (MTR_8g014820) mRNA, complete cds
BGI_novel_G000513	PRGDB00187911	48.1	129	65	1	907	1287	1074	1202	2.8e-31	136.7	Ta.74193	Putative_R-Genes,_predicted_from_NCBI_UniGene	Triticum aestivum	RLP	241988090	AK335347	Triticum aestivum cDNA, clone: WT012_K21, cultivar: Chinese Spring
BGI_novel_G000516	PRGDB00215267	69.2	78	24	0	639	872	3	80	8.2e-25	114.8	MDP0000256952	Putative_R-Genes,_predicted_from_Pythozome	Malus x domestica	RLP
BGI_novel_G000535	PRGDB00201109	56	50	19	2	1233	1379	279	326	3.1e-08	60.5	Bra015449	Putative_R-Genes,_predicted_from_Pythozome	Brassica rapa	RLP
BGI_novel_G000588	PRGDB00149836	49	863	410	13	272	2782	1	859	1.3e-219	763.1	clementine0.9_002094m	Putative_R-Genes,_predicted_from_Pythozome	Citrus clementina	NL			NB-ARC domain-containing disease resistance protein (best arabidopsis hit)
BGI_novel_G000590	PRGDB00184271	80.9	47	8	1	543	683	662	707	7.7e-16	85.5	GRMZM2G162531_T01	Putative_R-Genes,_predicted_from_Pythozome	Zea mays	RLP			STRUBBELIG-receptor family 8 (best arabidopsis hit); STRUBBELIG-RECEPTOR FAMILY 7 precursor, putative, expressed (best rice hit)
BGI_novel_G000639	PRGDB00204891	55.4	74	33	0	534	755	757	830	5.6e-14	79	Lus10020500	Putative_R-Genes,_predicted_from_Pythozome	Linum usitatissimum	RLP
BGI_novel_G000644	PRGDB00148403	27.7	137	97	2	73	480	1386	1521	8.8e-08	56.6	clementine0.9_035959m	Putative_R-Genes,_predicted_from_Pythozome	Citrus clementina	CNL			NB-ARC domain-containing disease resistance protein (best arabidopsis hit)
BGI_novel_G000645	PRGDB00186217	29.1	358	209	13	1287	2309	1442	1771	5.2e-27	122.9	GRMZM2G381429_T01	Putative_R-Genes,_predicted_from_Pythozome	Zea mays	NL			NB-ARC domain-containing disease resistance protein (best arabidopsis hit); resistance protein, putative, expressed (best rice hit)
BGI_novel_G000647	PRGDB00186217	29.9	318	184	10	2635	3552	1481	1771	5.1e-26	120.2	GRMZM2G381429_T01	Putative_R-Genes,_predicted_from_Pythozome	Zea mays	NL			NB-ARC domain-containing disease resistance protein (best arabidopsis hit); resistance protein, putative, expressed (best rice hit)
BGI_novel_G000652	PRGDB00186217	29.9	318	184	10	2812	3729	1481	1771	5.3e-26	120.2	GRMZM2G381429_T01	Putative_R-Genes,_predicted_from_Pythozome	Zea mays	NL			NB-ARC domain-containing disease resistance protein (best arabidopsis hit); resistance protein, putative, expressed (best rice hit)
BGI_novel_G000653	PRGDB00186217	29.9	318	184	10	3256	4173	1481	1771	5.9e-26	120.2	GRMZM2G381429_T01	Putative_R-Genes,_predicted_from_Pythozome	Zea mays	NL			NB-ARC domain-containing disease resistance protein (best arabidopsis hit); resistance protein, putative, expressed (best rice hit)
BGI_novel_G000661	PRGDB00215055	33	103	58	3	683	979	801	896	1e-07	58.5	MDP0000248164	Putative_R-Genes,_predicted_from_Pythozome	Malus x domestica	NL
BGI_novel_G000751	PRGDB00061511	43.8	422	233	2	689	1951	2278	2696	2.2e-101	370.2	disease resistance protein	Putative_R-Genes,_collected_from_NCBI_Protein	Brassica rapa subsp. pekinensis	TNL	227438238	FJ842828	Brassica rapa subsp. pekinensis isolate BrTNL10 disease resistance protein gene, complete cds.
BGI_novel_G000753	PRGDB00078883	36.8	304	188	2	1781	2683	172	474	2.3e-44	181.4	Vvi.16557	Putative_R-Genes,_predicted_from_NCBI_UniGene	Vitis vinifera	RLP	225441697	XM_002277255	PREDICTED: Vitis vinifera hypothetical protein LOC100262317 (LOC100262317), mRNA
BGI_novel_G000765	PRGDB00061522	46.3	41	22	0	1632	1754	21	61	0.0019	45.1	disease resistance protein	Putative_R-Genes,_collected_from_NCBI_Protein	Brassica rapa subsp. pekinensis	NL	227438216	FJ842817	Brassica rapa subsp. pekinensis isolate BrNL12 disease resistance protein gene, complete cds.
BGI_novel_G000774	PRGDB00202169	38.9	36	18	1	236	331	5	40	17	30.4	Bra007015	Putative_R-Genes,_predicted_from_Pythozome	Brassica rapa	RLP
BGI_novel_G000806	PRGDB00195350	29.4	163	98	5	513	980	1245	1397	2e-07	57.4	Phvulv091013216m	Putative_R-Genes,_predicted_from_Pythozome	Phaseolus vulgaris	CNL
BGI_novel_G000808	PRGDB00195350	29.4	163	98	5	1460	1927	1245	1397	3e-07	57.4	Phvulv091013216m	Putative_R-Genes,_predicted_from_Pythozome	Phaseolus vulgaris	CNL
BGI_novel_G000809	PRGDB00195350	29.4	163	98	5	614	1081	1245	1397	2.1e-07	57.4	Phvulv091013216m	Putative_R-Genes,_predicted_from_Pythozome	Phaseolus vulgaris	CNL
BGI_novel_G000810	PRGDB00175342	49.3	150	64	6	3266	3694	724	868	6.2e-27	123.2	POPTR_0019s00390.1	Putative_R-Genes,_predicted_from_Pythozome	Populus trichocarpa	NL			LRR and NB-ARC domains-containing disease resistance protein (best arabidopsis hit)
BGI_novel_G000811	PRGDB00175342	49.3	150	64	6	2990	3418	724	868	5.7e-27	123.2	POPTR_0019s00390.1	Putative_R-Genes,_predicted_from_Pythozome	Populus trichocarpa	NL			LRR and NB-ARC domains-containing disease resistance protein (best arabidopsis hit)
BGI_novel_G000826	PRGDB00176281	46.7	45	23	1	1236	1370	139	182	0.0021	43.9	29666.m001443	Putative_R-Genes,_predicted_from_Pythozome	Oryza barthii	NL			Disease resistance protein (CC-NBS-LRR class) family (best arabidopsis hit)
BGI_novel_G000827	PRGDB00176281	46.7	45	23	1	2474	2608	139	182	0.0037	43.9	29666.m001443	Putative_R-Genes,_predicted_from_Pythozome	Oryza barthii	NL			Disease resistance protein (CC-NBS-LRR class) family (best arabidopsis hit)
BGI_novel_G000919	PRGDB00196775	33	115	69	4	1397	1077	1162	1276	1.4e-07	57.8	Phvulv091001300m	Putative_R-Genes,_predicted_from_Pythozome	Phaseolus vulgaris	TNL
BGI_novel_G000933	PRGDB00206908	23.2	452	284	14	31	1323	216	625	1.5e-19	97.8	LOC_Os02g02660.1	Putative_R-Genes,_predicted_from_Pythozome	Oryza sativa	CNL
BGI_novel_G001023	PRGDB00165191	34.4	154	100	1	776	1237	797	949	5.7e-21	102.1	mgv1a000858m	Putative_R-Genes,_predicted_from_Pythozome	Cucumis x hytivus	NL			NB-ARC domain-containing disease resistance protein (best arabidopsis hit)
BGI_novel_G001054	PRGDB00162428	63.7	963	340	7	300	3179	1	956	0	1197.6	cassava4.1_001094m	Putative_R-Genes,_predicted_from_Pythozome	Vitis aestivalis	RLP			Leucine-rich repeat protein kinase family protein (best arabidopsis hit)
BGI_novel_G001067	PRGDB00144080	40	95	56	1	1084	1365	238	332	3.4e-15	83.2	907240	Putative_R-Genes,_predicted_from_Pythozome	Arabidopsis lyrata	CNL			Disease resistance protein (CC-NBS-LRR class) family (best arabidopsis hit)
BGI_novel_G001080	PRGDB00078883	40.2	276	154	5	2992	2180	170	439	8e-41	169.9	Vvi.16557	Putative_R-Genes,_predicted_from_NCBI_UniGene	Vitis vinifera	RLP	225441697	XM_002277255	PREDICTED: Vitis vinifera hypothetical protein LOC100262317 (LOC100262317), mRNA
BGI_novel_G001113	PRGDB00168424	25.3	166	105	4	47	532	368	518	6.8e-06	51.6	Medtr5g022410.1	Putative_R-Genes,_predicted_from_Pythozome	Medicago truncatula	TNL			Disease resistance protein (TIR-NBS-LRR class) family (best arabidopsis hit)
BGI_novel_G001145	PRGDB00141906	51.7	89	35	2	1511	1753	660	748	1.2e-16	88.2	AcoGoldSmith_v1.015485m	Putative_R-Genes,_predicted_from_Pythozome	Gossypium arboreum	N			pleiotropic drug resistance 3 (best arabidopsis hit)
BGI_novel_G001146	PRGDB00141906	51.7	89	35	2	362	604	660	748	5.3e-17	88.2	AcoGoldSmith_v1.015485m	Putative_R-Genes,_predicted_from_Pythozome	Gossypium arboreum	N			pleiotropic drug resistance 3 (best arabidopsis hit)
BGI_novel_G001148	PRGDB00207164	54.2	96	36	2	1039	1302	660	755	3.8e-22	106.3	Aquca_045_00059.1	Putative_R-Genes,_predicted_from_Pythozome	Aquilegia coerulea	N
BGI_novel_G001198	PRGDB00215267	37.9	145	81	3	1355	1777	694	833	9.3e-13	75.9	MDP0000256952	Putative_R-Genes,_predicted_from_Pythozome	Malus x domestica	RLP
BGI_novel_G001202	PRGDB00216446	33.2	190	111	2	574	1095	915	1104	6.4e-30	132.5	MDP0000196862	Putative_R-Genes,_predicted_from_Pythozome	Malus x domestica	RLP
BGI_novel_G001206	PRGDB00213184	75.2	133	33	0	665	1063	1	133	4.3e-50	199.1	MDP0000285888	Putative_R-Genes,_predicted_from_Pythozome	Malus x domestica	CNL
BGI_novel_G001224	PRGDB00078883	40.2	209	122	1	4833	4207	198	403	3.1e-36	154.5	Vvi.16557	Putative_R-Genes,_predicted_from_NCBI_UniGene	Vitis vinifera	RLP	225441697	XM_002277255	PREDICTED: Vitis vinifera hypothetical protein LOC100262317 (LOC100262317), mRNA
BGI_novel_G001236	PRGDB00195495	28.7	307	200	7	3196	4098	1126	1419	7.3e-21	103.2	Phvulv091018313m	Putative_R-Genes,_predicted_from_Pythozome	Phaseolus vulgaris	TNL
BGI_novel_G001248	PRGDB00078883	43.9	41	23	0	2459	2581	175	215	0.28	38.5	Vvi.16557	Putative_R-Genes,_predicted_from_NCBI_UniGene	Vitis vinifera	RLP	225441697	XM_002277255	PREDICTED: Vitis vinifera hypothetical protein LOC100262317 (LOC100262317), mRNA
BGI_novel_G001256	PRGDB00193121	30.2	106	72	1	457	140	915	1018	9.3e-08	58.2	Ta.71864	Putative_R-Genes,_predicted_from_NCBI_UniGene	Triticum aestivum	CNL	312469343	HP616612	TSA: Triticum aestivum cultivar Bobwhite isotig07427.flagleaf mRNA sequence
BGI_novel_G001258	PRGDB00078883	38.9	296	173	3	1420	2289	168	461	4e-43	177.2	Vvi.16557	Putative_R-Genes,_predicted_from_NCBI_UniGene	Vitis vinifera	RLP	225441697	XM_002277255	PREDICTED: Vitis vinifera hypothetical protein LOC100262317 (LOC100262317), mRNA
BGI_novel_G001259	PRGDB00078883	38.9	296	173	3	2096	2965	168	461	4.6e-43	177.2	Vvi.16557	Putative_R-Genes,_predicted_from_NCBI_UniGene	Vitis vinifera	RLP	225441697	XM_002277255	PREDICTED: Vitis vinifera hypothetical protein LOC100262317 (LOC100262317), mRNA
BGI_novel_G001276	PRGDB00196775	32.8	119	70	3	1174	845	1159	1276	1.6e-09	63.9	Phvulv091001300m	Putative_R-Genes,_predicted_from_Pythozome	Phaseolus vulgaris	TNL
BGI_novel_G001298	PRGDB00199472	39.8	103	60	2	206	508	847	949	4.8e-13	74.3	Pavirv00061359m	Putative_R-Genes,_predicted_from_Pythozome	Panicum virgatum	NL
BGI_novel_G001310	PRGDB00078883	39.1	207	120	3	2518	1913	172	377	2.4e-30	135.6	Vvi.16557	Putative_R-Genes,_predicted_from_NCBI_UniGene	Vitis vinifera	RLP	225441697	XM_002277255	PREDICTED: Vitis vinifera hypothetical protein LOC100262317 (LOC100262317), mRNA
BGI_novel_G001322	PRGDB00061511	50.2	215	107	0	3732	4376	2284	2498	1.6e-57	225.3	disease resistance protein	Putative_R-Genes,_collected_from_NCBI_Protein	Brassica rapa subsp. pekinensis	TNL	227438238	FJ842828	Brassica rapa subsp. pekinensis isolate BrTNL10 disease resistance protein gene, complete cds.
BGI_novel_G001323	PRGDB00182255	46.7	75	34	1	886	1110	1614	1682	1.7e-08	61.2	441722	Putative_R-Genes,_predicted_from_Pythozome	Selaginella moellendorffii	N			pleiotropic drug resistance 12 (best arabidopsis hit)
BGI_novel_G001455	PRGDB00061511	55.7	79	35	0	111	347	2303	2381	3.9e-18	92.4	disease resistance protein	Putative_R-Genes,_collected_from_NCBI_Protein	Brassica rapa subsp. pekinensis	TNL	227438238	FJ842828	Brassica rapa subsp. pekinensis isolate BrTNL10 disease resistance protein gene, complete cds.
BGI_novel_G001468	PRGDB00201227	59.4	64	24	2	280	468	1455	1517	2.3e-13	75.9	Bra026094	Putative_R-Genes,_predicted_from_Pythozome	Brassica rapa	CNL
BGI_novel_G001477	PRGDB00167217	48.2	85	43	1	1620	1874	953	1036	4.2e-16	86.7	mgv1a020513m	Putative_R-Genes,_predicted_from_Pythozome	Cucumis x hytivus	CNL			NB-ARC domain-containing disease resistance protein (best arabidopsis hit)
BGI_novel_G001544	PRGDB00167655	29.2	219	143	4	87	740	602	809	5e-18	91.7	Medtr2g018300.1	Putative_R-Genes,_predicted_from_Pythozome	Medicago truncatula	CNL			LRR and NB-ARC domains-containing disease resistance protein (best arabidopsis hit)
BGI_novel_G001605	PRGDB00189975	39.3	89	45	4	526	786	1514	1595	6.7e-09	61.6	Hv.37291	Putative_R-Genes,_predicted_from_NCBI_UniGene	Hordeum vulgare	NL	326489646	AK370605	Hordeum vulgare subsp. vulgare mRNA for predicted protein, complete cds, clone: NIASHv2113B23
BGI_novel_G001608	PRGDB00215267	42.3	168	96	1	1182	1685	704	870	1.9e-28	128.6	MDP0000256952	Putative_R-Genes,_predicted_from_Pythozome	Malus x domestica	RLP
BGI_novel_G001612	PRGDB00047385	60.9	87	34	0	1580	1840	397	483	4.7e-25	115.9	NBS type disease resistance protein	Putative_R-Genes,_collected_from_NCBI_Protein	Populus trichocarpa	N	105922962	DQ513233	Populus trichocarpa clone 177919 NBS type disease resistance protein mRNA, complete cds.
BGI_novel_G001623	PRGDB00149626	52	483	220	8	676	2106	208	684	8.4e-124	444.5	clementine0.9_001938m	Putative_R-Genes,_predicted_from_Pythozome	Citrus clementina	CNL			Disease resistance protein (CC-NBS-LRR class) family (best arabidopsis hit)
BGI_novel_G001625	PRGDB00078883	38.7	248	140	6	960	1691	268	507	1.9e-35	151.4	Vvi.16557	Putative_R-Genes,_predicted_from_NCBI_UniGene	Vitis vinifera	RLP	225441697	XM_002277255	PREDICTED: Vitis vinifera hypothetical protein LOC100262317 (LOC100262317), mRNA
BGI_novel_G001626	PRGDB00078883	38.7	248	140	6	721	1452	268	507	1.8e-35	151.4	Vvi.16557	Putative_R-Genes,_predicted_from_NCBI_UniGene	Vitis vinifera	RLP	225441697	XM_002277255	PREDICTED: Vitis vinifera hypothetical protein LOC100262317 (LOC100262317), mRNA
BGI_novel_G001678	PRGDB00167217	44.6	56	30	1	1276	1109	978	1032	7e-08	58.5	mgv1a020513m	Putative_R-Genes,_predicted_from_Pythozome	Cucumis x hytivus	CNL			NB-ARC domain-containing disease resistance protein (best arabidopsis hit)
BGI_novel_G001690	PRGDB00164453	25.5	216	146	6	1294	1914	1094	1303	4.2e-12	73.6	Glyma16g33590.1	Putative_R-Genes,_predicted_from_Pythozome	Glycine max	TNL			Disease resistance protein (TIR-NBS-LRR class) family (best arabidopsis hit)
BGI_novel_G001720	PRGDB00167217	43.6	78	43	1	1046	1279	961	1037	4.9e-13	76.6	mgv1a020513m	Putative_R-Genes,_predicted_from_Pythozome	Cucumis x hytivus	CNL			NB-ARC domain-containing disease resistance protein (best arabidopsis hit)
BGI_novel_G001732	PRGDB00061511	56.4	39	15	1	2752	2868	2046	2082	0.03	41.6	disease resistance protein	Putative_R-Genes,_collected_from_NCBI_Protein	Brassica rapa subsp. pekinensis	TNL	227438238	FJ842828	Brassica rapa subsp. pekinensis isolate BrTNL10 disease resistance protein gene, complete cds.
BGI_novel_G001820	PRGDB00078600	30.1	146	98	1	1611	2036	371	516	7.3e-10	65.9	Vvi.5127	Putative_R-Genes,_predicted_from_NCBI_UniGene	Vitis vinifera	RLK	225449666	XM_002264215	PREDICTED: Vitis vinifera hypothetical protein LOC100253963 (LOC100253963), mRNA
BGI_novel_G001854	PRGDB00148403	32.1	112	76	0	579	914	1394	1505	2.4e-09	62.8	clementine0.9_035959m	Putative_R-Genes,_predicted_from_Pythozome	Citrus clementina	CNL			NB-ARC domain-containing disease resistance protein (best arabidopsis hit)
BGI_novel_G001886	PRGDB00192523	35.6	205	126	3	667	1272	2	203	3.2e-35	150.6	Mtr.24619	Putative_R-Genes,_predicted_from_NCBI_UniGene	Medicago truncatula	RLP	357513572	XM_003627027	Medicago truncatula Receptor-like protein kinase (MTR_8g014820) mRNA, complete cds
BGI_novel_G001888	PRGDB00192523	35.6	205	126	3	2761	2156	2	203	3.8e-35	150.6	Mtr.24619	Putative_R-Genes,_predicted_from_NCBI_UniGene	Medicago truncatula	RLP	357513572	XM_003627027	Medicago truncatula Receptor-like protein kinase (MTR_8g014820) mRNA, complete cds
BGI_novel_G001889	PRGDB00070731	53.4	58	26	1	339	512	26	82	5.3e-09	61.6	Mdo.689	Putative_R-Genes,_predicted_from_NCBI_UniGene	Malus x domestica	T	292668962	GU732467	Malus x domestica AP2 domain class transcription factor (AP2D43) mRNA, complete cds
BGI_novel_G001891	PRGDB00078600	32	194	127	2	569	1141	370	561	3.9e-21	103.2	Vvi.5127	Putative_R-Genes,_predicted_from_NCBI_UniGene	Vitis vinifera	RLK	225449666	XM_002264215	PREDICTED: Vitis vinifera hypothetical protein LOC100253963 (LOC100253963), mRNA
BGI_novel_G001898	PRGDB00078682	84.9	93	12	2	1055	1327	781	873	1.4e-38	161.4	Vvi.8276	Putative_R-Genes,_predicted_from_NCBI_UniGene	Vitis vinifera	NL	225452519	XM_002275052	PREDICTED: Vitis vinifera hypothetical protein LOC100250803 (LOC100250803), mRNA
BGI_novel_G001900	PRGDB00181635	30.2	139	86	4	274	663	11	147	8.2e-10	65.1	Si025833m	Putative_R-Genes,_predicted_from_Pythozome	Setaria italica	NL			NAC domain containing protein 90 (best arabidopsis hit); NBS-LRR disease resistance protein, putative, expressed (best rice hit)
BGI_novel_G001945	PRGDB00078883	34.1	82	54	0	1968	2213	309	390	1e-06	56.2	Vvi.16557	Putative_R-Genes,_predicted_from_NCBI_UniGene	Vitis vinifera	RLP	225441697	XM_002277255	PREDICTED: Vitis vinifera hypothetical protein LOC100262317 (LOC100262317), mRNA
BGI_novel_G002038	PRGDB00148403	21.7	161	117	2	88	555	1375	1531	8.3e-07	54.7	clementine0.9_035959m	Putative_R-Genes,_predicted_from_Pythozome	Citrus clementina	CNL			NB-ARC domain-containing disease resistance protein (best arabidopsis hit)
BGI_novel_G002193	PRGDB00178188	42.1	401	224	4	303	1496	227	622	4e-67	255.8	POPTR_0002s12280.1	Putative_R-Genes,_predicted_from_Pythozome	Populus trichocarpa	RLP			Leucine-rich repeat receptor-like protein kinase family protein (best arabidopsis hit)
BGI_novel_G002197	PRGDB00147863	33.5	161	102	3	646	1113	78	238	2.8e-13	76.3	clementine0.9_004226m	Putative_R-Genes,_predicted_from_Pythozome	Citrus clementina	RLP			Leucine-rich repeat receptor-like protein kinase family protein (best arabidopsis hit)
BGI_novel_G002205	PRGDB00167217	44	75	41	1	300	524	964	1037	1.1e-10	68.2	mgv1a020513m	Putative_R-Genes,_predicted_from_Pythozome	Cucumis x hytivus	CNL			NB-ARC domain-containing disease resistance protein (best arabidopsis hit)
BGI_novel_G002206	PRGDB00192523	31.3	275	165	7	1072	251	18	269	7e-22	105.5	Mtr.24619	Putative_R-Genes,_predicted_from_NCBI_UniGene	Medicago truncatula	RLP	357513572	XM_003627027	Medicago truncatula Receptor-like protein kinase (MTR_8g014820) mRNA, complete cds
BGI_novel_G002222	PRGDB00192408	27.2	213	136	5	1049	1660	1562	1764	7.9e-13	75.5	Mtr.17858	Putative_R-Genes,_predicted_from_NCBI_UniGene	Medicago truncatula	NL	357472002	XM_003606238	Medicago truncatula NBS resistance protein (MTR_4g055630) mRNA, complete cds
BGI_novel_G002225	PRGDB00206841	35.3	204	129	1	2356	2958	227	430	3.4e-31	137.9	LOC_Os04g53040.1	Putative_R-Genes,_predicted_from_Pythozome	Oryza sativa	NL
BGI_novel_G002301	PRGDB00078883	35	143	66	4	5408	5803	277	403	1.3e-12	76.3	Vvi.16557	Putative_R-Genes,_predicted_from_NCBI_UniGene	Vitis vinifera	RLP	225441697	XM_002277255	PREDICTED: Vitis vinifera hypothetical protein LOC100262317 (LOC100262317), mRNA
BGI_novel_G002308	PRGDB00206941	46.9	81	40	2	359	592	804	884	5.2e-10	65.5	LOC_Os05g17050.1	Putative_R-Genes,_predicted_from_Pythozome	Oryza sativa	RLP
BGI_novel_G002315	PRGDB00167710	30.1	249	169	3	584	1324	1346	1591	1.1e-27	125.6	Medtr2g047020.1	Putative_R-Genes,_predicted_from_Pythozome	Medicago truncatula	TNL			heat shock cognate protein 70-1 (best arabidopsis hit)
BGI_novel_G002326	PRGDB00215326	69.4	124	37	1	463	834	1478	1600	2.6e-45	183.3	MDP0000285649	Putative_R-Genes,_predicted_from_Pythozome	Malus x domestica	NL
BGI_novel_G002349	PRGDB00063306	20.8	144	103	3	837	1244	663	803	8.5e-06	52	hypothetical protein	Putative_R-Genes,_collected_from_NCBI_Protein	Oryza sativa Japonica Group	NL	297728740	NM_001189805	Oryza sativa Japonica Group Os11g0699100 (Os11g0699100) mRNA, complete cds.
BGI_novel_G002351	PRGDB00063306	20.8	144	103	3	902	1309	663	803	8.8e-06	52	hypothetical protein	Putative_R-Genes,_collected_from_NCBI_Protein	Oryza sativa Japonica Group	NL	297728740	NM_001189805	Oryza sativa Japonica Group Os11g0699100 (Os11g0699100) mRNA, complete cds.
BGI_novel_G002354	PRGDB00063306	20.8	144	103	3	870	1277	663	803	8.7e-06	52	hypothetical protein	Putative_R-Genes,_collected_from_NCBI_Protein	Oryza sativa Japonica Group	NL	297728740	NM_001189805	Oryza sativa Japonica Group Os11g0699100 (Os11g0699100) mRNA, complete cds.
BGI_novel_G002433	PRGDB00192523	39	182	108	2	2273	2809	2	183	3.7e-35	150.2	Mtr.24619	Putative_R-Genes,_predicted_from_NCBI_UniGene	Medicago truncatula	RLP	357513572	XM_003627027	Medicago truncatula Receptor-like protein kinase (MTR_8g014820) mRNA, complete cds
BGI_novel_G002458	PRGDB00075085	52	640	254	10	89	1927	37	650	5.8e-173	607.4	Pth.286	Putative_R-Genes,_predicted_from_NCBI_UniGene	Populus trichocarpa	RLK-GNK2	224113934	XM_002316582	Populus trichocarpa predicted protein, mRNA
BGI_novel_G002459	PRGDB00166456	61.5	663	215	10	175	2100	15	658	1.4e-220	765.8	cassava4.1_003218m	Putative_R-Genes,_predicted_from_Pythozome	Vitis aestivalis	RLK-GNK2			cysteine-rich RLK (RECEPTOR-like protein kinase) 25 (best arabidopsis hit)
BGI_novel_G002523	PRGDB00217737	39.5	81	46	1	212	454	355	432	2.3e-08	59.3	Thhalv10027751m	Putative_R-Genes,_predicted_from_Pythozome	Eutrema halophilum	TNL
BGI_novel_G002635	PRGDB00078883	33.2	217	135	3	1203	1835	171	383	2e-23	110.5	Vvi.16557	Putative_R-Genes,_predicted_from_NCBI_UniGene	Vitis vinifera	RLP	225441697	XM_002277255	PREDICTED: Vitis vinifera hypothetical protein LOC100262317 (LOC100262317), mRNA
BGI_novel_G002679	PRGDB00078883	33.4	299	191	6	1843	2724	206	501	8.2e-26	119.8	Vvi.16557	Putative_R-Genes,_predicted_from_NCBI_UniGene	Vitis vinifera	RLP	225441697	XM_002277255	PREDICTED: Vitis vinifera hypothetical protein LOC100262317 (LOC100262317), mRNA
BGI_novel_G002707	PRGDB00211015	50.4	568	276	3	234	1928	8	572	1.4e-148	528.1	Eucgr.F04101.1	Putative_R-Genes,_predicted_from_Pythozome	Eucalyptus grandis	RLP
BGI_novel_G002708	PRGDB00170879	35.3	238	139	7	342	1037	1274	1502	1.4e-21	103.6	Pp1s176_100V6.1	Putative_R-Genes,_predicted_from_Pythozome	Physcomitrella patens	RLP			disease resistance protein (TIR-NBS-LRR class) (best arabidopsis hit)
BGI_novel_G002746	PRGDB00200918	32.1	321	174	18	924	1829	521	816	2.5e-32	140.2	Bra023648	Putative_R-Genes,_predicted_from_Pythozome	Brassica rapa	TNL
BGI_novel_G002748	PRGDB00061522	42.1	121	70	0	4533	4895	1276	1396	2.2e-19	98.6	disease resistance protein	Putative_R-Genes,_collected_from_NCBI_Protein	Brassica rapa subsp. pekinensis	NL	227438216	FJ842817	Brassica rapa subsp. pekinensis isolate BrNL12 disease resistance protein gene, complete cds.
BGI_novel_G002749	PRGDB00163437	29.6	321	176	10	1887	2732	586	895	8.4e-23	109.4	Glyma14g23930.1	Putative_R-Genes,_predicted_from_Pythozome	Glycine max	CNL			disease resistance protein (TIR-NBS-LRR class), putative (best arabidopsis hit)
BGI_novel_G002751	PRGDB00149757	28	250	161	8	2005	2709	734	979	1.1e-09	65.9	evm.model.supercontig_2.253	Putative_R-Genes,_predicted_from_Pythozome	Arabidopsis lyrata subsp. lyrata	TNL			disease resistance protein (TIR-NBS-LRR class), putative (best arabidopsis hit)
BGI_novel_G002752	PRGDB00175773	46.9	143	76	0	1462	1034	28	170	1.5e-33	144.4	27622.m000146	Putative_R-Genes,_predicted_from_Pythozome	Oryza barthii	RLP			Leucine-rich repeat protein kinase family protein (best arabidopsis hit)
BGI_novel_G002762	PRGDB00149582	36.1	227	137	5	3	668	147	370	2.1e-31	135.6	clementine0.9_000801m	Putative_R-Genes,_predicted_from_Pythozome	Citrus clementina	TNL			disease resistance protein (TIR-NBS-LRR class), putative (best arabidopsis hit)
BGI_novel_G002763	PRGDB00175330	28.8	240	124	7	2181	2849	708	917	6.8e-09	63.2	POPTR_0019s09760.1	Putative_R-Genes,_predicted_from_Pythozome	Populus trichocarpa	TNL			disease resistance protein (TIR-NBS-LRR class), putative (best arabidopsis hit)
BGI_novel_G002765	PRGDB00062496	27.8	194	104	6	704	1246	554	724	0.00086	45.8	tir-nbs-lrr resistance protein	Putative_R-Genes,_collected_from_NCBI_Protein	Populus trichocarpa	TNL	116047823	CM000355	Populus trichocarpa linkage group XIX, whole genome shotgun sequence.
BGI_novel_G002766	PRGDB00079096	45.9	170	87	2	131	637	10	175	1.6e-33	145.6	Vvi.25563	Putative_R-Genes,_predicted_from_NCBI_UniGene	Vitis vinifera	CNL	225460216	XM_002277805	PREDICTED: Vitis vinifera hypothetical protein LOC100251634 (LOC100251634), mRNA
BGI_novel_G002767	PRGDB00079096	45.9	170	87	2	98	604	10	175	1.7e-33	145.6	Vvi.25563	Putative_R-Genes,_predicted_from_NCBI_UniGene	Vitis vinifera	CNL	225460216	XM_002277805	PREDICTED: Vitis vinifera hypothetical protein LOC100251634 (LOC100251634), mRNA
BGI_novel_G002769	PRGDB00149816	29.3	321	192	11	1913	2839	629	926	3.9e-17	90.9	clementine0.9_000646m	Putative_R-Genes,_predicted_from_Pythozome	Citrus clementina	TNL			disease resistance protein (TIR-NBS-LRR class), putative (best arabidopsis hit)
BGI_novel_G002771	PRGDB00149758	27.9	566	311	26	2036	3583	661	1179	1.5e-34	149.1	evm.model.supercontig_2.255	Putative_R-Genes,_predicted_from_Pythozome	Arabidopsis lyrata subsp. lyrata	CNL			disease resistance protein (TIR-NBS-LRR class), putative (best arabidopsis hit)
BGI_novel_G002772	PRGDB00149758	27.9	566	311	26	1936	3483	661	1179	1.5e-34	149.1	evm.model.supercontig_2.255	Putative_R-Genes,_predicted_from_Pythozome	Arabidopsis lyrata subsp. lyrata	CNL			disease resistance protein (TIR-NBS-LRR class), putative (best arabidopsis hit)
BGI_novel_G002773	PRGDB00174071	28.4	222	103	8	403	975	966	1162	2.9e-05	51.2	ppa014815m	Putative_R-Genes,_predicted_from_Pythozome	Prunus persica	TNL			disease resistance protein (TIR-NBS-LRR class), putative (best arabidopsis hit)
BGI_novel_G002776	PRGDB00213858	32.5	1211	690	32	171	3632	6	1146	1.6e-160	567	MDP0000378930	Putative_R-Genes,_predicted_from_Pythozome	Malus x domestica	TNL
BGI_novel_G002778	PRGDB00213858	32.6	1194	683	31	171	3596	6	1129	2.1e-159	563.9	MDP0000378930	Putative_R-Genes,_predicted_from_Pythozome	Malus x domestica	TNL
BGI_novel_G002784	PRGDB00202496	33.3	150	72	7	442	873	1351	1478	4.6e-05	50.1	Bra020861	Putative_R-Genes,_predicted_from_Pythozome	Brassica rapa	TNL
BGI_novel_G002785	PRGDB00158699	41.4	116	60	4	8	349	827	936	1.1e-11	72.4	Glyma06g41380.1	Putative_R-Genes,_predicted_from_Pythozome	Glycine max	CNL			disease resistance protein (TIR-NBS-LRR class) (best arabidopsis hit)
BGI_novel_G002787	PRGDB00202496	34.8	46	29	1	45	179	278	323	25	31.2	Bra020861	Putative_R-Genes,_predicted_from_Pythozome	Brassica rapa	TNL
BGI_novel_G002790	PRGDB00184440	53.6	151	69	1	166	615	5	155	2.6e-36	152.5	GSVIVT01036408001	Putative_R-Genes,_predicted_from_Pythozome	Vitis vinifera	TNL			Disease resistance protein (TIR-NBS-LRR class) family (best arabidopsis hit)
BGI_novel_G002793	PRGDB00205572	60.8	181	55	4	140	643	856	1033	1.2e-48	193.4	Lus10010223	Putative_R-Genes,_predicted_from_Pythozome	Linum usitatissimum	NL
BGI_novel_G002794	PRGDB00205572	63.9	108	27	2	450	746	929	1033	1.8e-26	119.8	Lus10010223	Putative_R-Genes,_predicted_from_Pythozome	Linum usitatissimum	NL
BGI_novel_G002823	PRGDB00150715	65	845	281	7	230	2740	1	838	7.2e-313	1073.2	evm.TU.contig_30789.1	Putative_R-Genes,_predicted_from_Pythozome	Arabidopsis lyrata subsp. lyrata	RLP			Leucine-rich repeat protein kinase family protein (best arabidopsis hit)
BGI_novel_G003030	PRGDB00206903	35.4	79	49	1	2098	2334	621	697	0.00064	47	LOC_Os02g16090.1	Putative_R-Genes,_predicted_from_Pythozome	Oryza sativa	CN
BGI_novel_G003032	PRGDB00168424	29.9	174	97	7	1133	648	366	526	2.9e-09	63.2	Medtr5g022410.1	Putative_R-Genes,_predicted_from_Pythozome	Medicago truncatula	TNL			Disease resistance protein (TIR-NBS-LRR class) family (best arabidopsis hit)
BGI_novel_G003055	PRGDB00215264	35.3	102	62	3	88	384	116	216	8.6e-07	54.7	MDP0000156744	Putative_R-Genes,_predicted_from_Pythozome	Malus x domestica	T
BGI_novel_G003078	PRGDB00149954	40.5	990	513	24	217	3021	6	974	2e-183	642.9	clementine0.9_001471m	Putative_R-Genes,_predicted_from_Pythozome	Citrus clementina	CNL			NB-ARC domain-containing disease resistance protein (best arabidopsis hit)
BGI_novel_G003083	PRGDB00068721	55	160	63	3	674	1144	27	180	1.5e-39	163.7	Ghi.24694	Putative_R-Genes,_predicted_from_NCBI_UniGene	Gossypium hirsutum	CNL	109876380	DW505354	GH_TMIRS_093_B09_F Cotton Normalized Library dT primed Gossypium hirsutum cDNA, mRNA sequence
BGI_novel_G003104	PRGDB00192523	41.1	107	63	0	3008	3328	46	152	3.5e-16	87.8	Mtr.24619	Putative_R-Genes,_predicted_from_NCBI_UniGene	Medicago truncatula	RLP	357513572	XM_003627027	Medicago truncatula Receptor-like protein kinase (MTR_8g014820) mRNA, complete cds
BGI_novel_G003108	PRGDB00157612	50.9	507	243	5	406	1914	18	522	4.4e-132	471.9	orange1.1g001805m	Putative_R-Genes,_predicted_from_Pythozome	Citrus sinensis	TNL			transmembrane receptors;ATP binding (best arabidopsis hit)
BGI_novel_G003111	PRGDB00066564	43	107	60	1	610	927	1127	1233	6.3e-12	72.4	At.45170	Putative_R-Genes,_predicted_from_NCBI_UniGene	Arabidopsis thaliana	TNL	110741818	AK226752	Arabidopsis thaliana mRNA for putative disease resistance protein, complete cds, clone: RAFL07-75-G09
BGI_novel_G003112	PRGDB00166209	49.9	517	257	2	483	2033	25	539	2.5e-139	496.5	cassava4.1_028330m	Putative_R-Genes,_predicted_from_Pythozome	Vitis aestivalis	TNL			disease resistance protein (TIR-NBS-LRR class), putative (best arabidopsis hit)
BGI_novel_G003113	PRGDB00149737	51.9	156	69	3	477	932	17	170	1.4e-37	157.9	clementine0.9_001688m	Putative_R-Genes,_predicted_from_Pythozome	Citrus clementina	TNL			Disease resistance protein (TIR-NBS-LRR class) family (best arabidopsis hit)
BGI_novel_G003114	PRGDB00157612	39.9	1050	524	19	251	3259	18	1007	9.1e-188	658.3	orange1.1g001805m	Putative_R-Genes,_predicted_from_Pythozome	Citrus sinensis	TNL			transmembrane receptors;ATP binding (best arabidopsis hit)
BGI_novel_G003115	PRGDB00149509	53.4	528	242	4	248	1828	13	537	2.2e-153	543.1	clementine0.9_035990m	Putative_R-Genes,_predicted_from_Pythozome	Citrus clementina	TNL			disease resistance protein (TIR-NBS-LRR class), putative (best arabidopsis hit)
BGI_novel_G003120	PRGDB00148294	48.6	401	183	7	329	1477	66	461	5.9e-99	362.1	clementine0.9_000338m	Putative_R-Genes,_predicted_from_Pythozome	Citrus clementina	NL			LRR and NB-ARC domains-containing disease resistance protein (best arabidopsis hit)
BGI_novel_G003123	PRGDB00165841	49.3	538	263	6	306	1916	1	529	5.9e-142	505.8	cassava4.1_023508m	Putative_R-Genes,_predicted_from_Pythozome	Vitis aestivalis	CNL			NB-ARC domain-containing disease resistance protein (best arabidopsis hit)
BGI_novel_G003124	PRGDB00165841	49.3	538	263	6	101	1711	1	529	5.4e-142	505.8	cassava4.1_023508m	Putative_R-Genes,_predicted_from_Pythozome	Vitis aestivalis	CNL			NB-ARC domain-containing disease resistance protein (best arabidopsis hit)
BGI_novel_G003125	PRGDB00165841	49.3	538	263	6	4517	2907	1	529	5.2e-142	505.8	cassava4.1_023508m	Putative_R-Genes,_predicted_from_Pythozome	Vitis aestivalis	CNL			NB-ARC domain-containing disease resistance protein (best arabidopsis hit)
BGI_novel_G003126	PRGDB00165841	49.3	538	263	6	59	1669	1	529	5e-142	505.8	cassava4.1_023508m	Putative_R-Genes,_predicted_from_Pythozome	Vitis aestivalis	CNL			NB-ARC domain-containing disease resistance protein (best arabidopsis hit)
BGI_novel_G003127	PRGDB00165841	47.1	881	419	14	3507	889	1	842	1e-201	703.7	cassava4.1_023508m	Putative_R-Genes,_predicted_from_Pythozome	Vitis aestivalis	CNL			NB-ARC domain-containing disease resistance protein (best arabidopsis hit)
BGI_novel_G003134	PRGDB00175345	40.4	1224	610	25	101	3529	1	1185	9.5e-226	783.9	POPTR_0019s10290.1	Putative_R-Genes,_predicted_from_Pythozome	Populus trichocarpa	NL			LRR and NB-ARC domains-containing disease resistance protein (best arabidopsis hit)
BGI_novel_G003136	PRGDB00177397	41.9	246	129	5	288	1001	368	607	6.9e-44	179.5	30061.m000284	Putative_R-Genes,_predicted_from_Pythozome	Oryza barthii	NL			NB-ARC domain-containing disease resistance protein (best arabidopsis hit)
BGI_novel_G003139	PRGDB00165842	45.9	647	327	9	424	2352	2	629	9.1e-150	531.6	cassava4.1_023493m	Putative_R-Genes,_predicted_from_Pythozome	Vitis aestivalis	NL			NB-ARC domain-containing disease resistance protein (best arabidopsis hit)
BGI_novel_G003194	PRGDB00148403	22.2	189	128	4	157	687	1393	1574	1e-06	55.1	clementine0.9_035959m	Putative_R-Genes,_predicted_from_Pythozome	Citrus clementina	CNL			NB-ARC domain-containing disease resistance protein (best arabidopsis hit)
BGI_novel_G003216	PRGDB00211657	64.4	45	16	0	324	458	670	714	3.4e-12	72.8	Eucgr.H02157.1	Putative_R-Genes,_predicted_from_Pythozome	Eucalyptus grandis	TNL
BGI_novel_G003242	PRGDB00078883	32.9	246	162	1	2392	3129	170	412	1.2e-31	139	Vvi.16557	Putative_R-Genes,_predicted_from_NCBI_UniGene	Vitis vinifera	RLP	225441697	XM_002277255	PREDICTED: Vitis vinifera hypothetical protein LOC100262317 (LOC100262317), mRNA
BGI_novel_G003247	PRGDB00148403	36.8	68	41	1	146	343	1379	1446	3e-06	52.8	clementine0.9_035959m	Putative_R-Genes,_predicted_from_Pythozome	Citrus clementina	CNL			NB-ARC domain-containing disease resistance protein (best arabidopsis hit)
BGI_novel_G003278	PRGDB00201227	43.2	139	39	1	930	1226	1431	1569	1.1e-18	94.4	Bra026094	Putative_R-Genes,_predicted_from_Pythozome	Brassica rapa	CNL
BGI_novel_G003327	PRGDB00150555	77.8	361	79	1	129	1208	294	654	5e-162	571.2	evm.model.supercontig_69.83	Putative_R-Genes,_predicted_from_Pythozome	Arabidopsis lyrata subsp. lyrata	RLK-GNK2			cysteine-rich RLK (RECEPTOR-like protein kinase) 2 (best arabidopsis hit)
BGI_novel_G003328	PRGDB00148140	65.1	278	96	1	247	1077	5	282	4.1e-104	377.9	clementine0.9_004744m	Putative_R-Genes,_predicted_from_Pythozome	Citrus clementina	RLK-GNK2			cysteine-rich RLK (RECEPTOR-like protein kinase) 2 (best arabidopsis hit)
BGI_novel_G003342	PRGDB00061511	53.5	447	207	1	3082	4419	1749	2195	4e-137	490	disease resistance protein	Putative_R-Genes,_collected_from_NCBI_Protein	Brassica rapa subsp. pekinensis	TNL	227438238	FJ842828	Brassica rapa subsp. pekinensis isolate BrTNL10 disease resistance protein gene, complete cds.
BGI_novel_G003365	PRGDB00141906	68.2	66	21	0	862	1059	684	749	3.6e-22	106.3	AcoGoldSmith_v1.015485m	Putative_R-Genes,_predicted_from_Pythozome	Gossypium arboreum	N			pleiotropic drug resistance 3 (best arabidopsis hit)
BGI_novel_G003367	PRGDB00141906	68.2	66	21	0	1579	1776	684	749	5e-22	106.3	AcoGoldSmith_v1.015485m	Putative_R-Genes,_predicted_from_Pythozome	Gossypium arboreum	N			pleiotropic drug resistance 3 (best arabidopsis hit)
BGI_novel_G003379	PRGDB00078883	32.4	179	118	1	939	1466	276	454	4.5e-16	85.9	Vvi.16557	Putative_R-Genes,_predicted_from_NCBI_UniGene	Vitis vinifera	RLP	225441697	XM_002277255	PREDICTED: Vitis vinifera hypothetical protein LOC100262317 (LOC100262317), mRNA
BGI_novel_G003406	PRGDB00070731	55.8	86	32	2	638	880	4	88	1.7e-18	93.6	Mdo.689	Putative_R-Genes,_predicted_from_NCBI_UniGene	Malus x domestica	T	292668962	GU732467	Malus x domestica AP2 domain class transcription factor (AP2D43) mRNA, complete cds
BGI_novel_G003407	PRGDB00070731	50	112	47	2	731	1042	16	126	4.6e-19	95.5	Mdo.689	Putative_R-Genes,_predicted_from_NCBI_UniGene	Malus x domestica	T	292668962	GU732467	Malus x domestica AP2 domain class transcription factor (AP2D43) mRNA, complete cds
BGI_novel_G003410	PRGDB00215095	44.4	63	35	0	351	539	54	116	9.7e-10	63.9	MDP0000319352	Putative_R-Genes,_predicted_from_Pythozome	Malus x domestica	TNL
BGI_novel_G003420	PRGDB00167655	38.6	215	119	4	264	908	608	809	3.3e-33	142.9	Medtr2g018300.1	Putative_R-Genes,_predicted_from_Pythozome	Medicago truncatula	CNL			LRR and NB-ARC domains-containing disease resistance protein (best arabidopsis hit)
BGI_novel_G003447	PRGDB00169670	39.2	74	45	0	1031	1252	1309	1382	2.8e-08	60.1	Medtr7g107730.1	Putative_R-Genes,_predicted_from_Pythozome	Medicago truncatula	TNL			disease resistance protein (TIR-NBS-LRR class), putative (best arabidopsis hit)
BGI_novel_G003453	PRGDB00199472	33.3	138	85	3	930	1328	885	1020	7.9e-09	62	Pavirv00061359m	Putative_R-Genes,_predicted_from_Pythozome	Panicum virgatum	NL
BGI_novel_G003462	PRGDB00189838	62.5	128	48	0	198	581	1434	1561	2.4e-42	172.2	Hv.34616	Putative_R-Genes,_predicted_from_NCBI_UniGene	Hordeum vulgare	NL	326530114	AK377143	Hordeum vulgare subsp. vulgare mRNA for predicted protein, partial cds, clone: NIASHv3149K09
BGI_novel_G003474	PRGDB00206816	53.1	49	23	0	1166	1020	368	416	5.6e-08	58.5	LOC_Os10g21950.1	Putative_R-Genes,_predicted_from_Pythozome	Oryza sativa	NL
BGI_novel_G003494	PRGDB00188193	62	250	68	1	232	981	2	224	2.8e-78	292.7	Ghi.14515	Putative_R-Genes,_predicted_from_NCBI_UniGene	Gossypium hirsutum	RLP	333952413	JF800909	Gossypium hirsutum cultivar Restoring line Y18 somatic embryogenesis receptor-like kinase 3 protein (serk3) mRNA, complete cds
BGI_novel_G003556	PRGDB00161715	67.5	77	25	0	938	1168	295	371	8.1e-18	92.4	cassava4.1_001587m	Putative_R-Genes,_predicted_from_Pythozome	Vitis aestivalis	CNL			NB-ARC domain-containing disease resistance protein (best arabidopsis hit)
BGI_novel_G003682	PRGDB00201227	58.6	58	23	1	683	856	1461	1517	3.3e-11	69.3	Bra026094	Putative_R-Genes,_predicted_from_Pythozome	Brassica rapa	CNL
BGI_novel_G003708	PRGDB00192523	39	182	108	2	1797	2333	2	183	7.9e-36	152.1	Mtr.24619	Putative_R-Genes,_predicted_from_NCBI_UniGene	Medicago truncatula	RLP	357513572	XM_003627027	Medicago truncatula Receptor-like protein kinase (MTR_8g014820) mRNA, complete cds
BGI_novel_G003710	PRGDB00217051	74.9	223	56	0	929	1597	121	343	6.9e-94	345.1	MDP0000182032	Putative_R-Genes,_predicted_from_Pythozome	Malus x domestica	T
BGI_novel_G003725	PRGDB00184310	69.6	79	24	0	622	858	952	1030	1.7e-24	114.4	GSVIVT01034283001	Putative_R-Genes,_predicted_from_Pythozome	Vitis vinifera	NL			receptor like protein 14 (best arabidopsis hit)
BGI_novel_G003726	PRGDB00143781	80	35	7	0	896	1000	169	203	7.7e-09	62	356572	Putative_R-Genes,_predicted_from_Pythozome	Arabidopsis lyrata	T			Disease resistance protein (TIR-NBS-LRR class) family (best arabidopsis hit)
BGI_novel_G003751	PRGDB00149028	45.9	159	82	2	3077	3550	779	934	1.5e-28	128.6	clementine0.9_001692m	Putative_R-Genes,_predicted_from_Pythozome	Citrus clementina	CNL			NB-ARC domain-containing disease resistance protein (best arabidopsis hit)
BGI_novel_G003753	PRGDB00149028	45.9	159	82	2	4084	4557	779	934	1.9e-28	128.6	clementine0.9_001692m	Putative_R-Genes,_predicted_from_Pythozome	Citrus clementina	CNL			NB-ARC domain-containing disease resistance protein (best arabidopsis hit)
BGI_novel_G003754	PRGDB00177506	29.6	179	110	4	36	548	1145	1315	2e-15	83.2	POPTR_0001s42440.1	Putative_R-Genes,_predicted_from_Pythozome	Populus trichocarpa	CNL			NB-ARC domain-containing disease resistance protein (best arabidopsis hit)
BGI_novel_G003756	PRGDB00177143	30.5	82	45	2	179	424	797	866	0.57	35.8	POPTR_0001s47840.1	Putative_R-Genes,_predicted_from_Pythozome	Populus trichocarpa	CNL			NB-ARC domain-containing disease resistance protein (best arabidopsis hit)
BGI_novel_G003757	PRGDB00177143	30.5	82	45	2	186	431	797	866	0.67	35.8	POPTR_0001s47840.1	Putative_R-Genes,_predicted_from_Pythozome	Populus trichocarpa	CNL			NB-ARC domain-containing disease resistance protein (best arabidopsis hit)
BGI_novel_G003758	PRGDB00177143	30.5	82	45	2	186	431	797	866	0.58	35.8	POPTR_0001s47840.1	Putative_R-Genes,_predicted_from_Pythozome	Populus trichocarpa	CNL			NB-ARC domain-containing disease resistance protein (best arabidopsis hit)
BGI_novel_G003765	PRGDB00214485	77.3	110	25	0	1	330	871	980	5.6e-46	183.3	MDP0000287433	Putative_R-Genes,_predicted_from_Pythozome	Malus x domestica	CN
BGI_novel_G003783	PRGDB00192428	36.7	281	174	3	3379	4215	993	1271	6.4e-44	179.9	Mtr.19746	Putative_R-Genes,_predicted_from_NCBI_UniGene	Medicago truncatula	RLP	357446746	XM_003593601	Medicago truncatula Receptor-like protein kinase HSL1 (MTR_2g014560) mRNA, complete cds
BGI_novel_G003918	PRGDB00215267	32.6	236	149	5	2426	3118	704	934	1.8e-27	125.2	MDP0000256952	Putative_R-Genes,_predicted_from_Pythozome	Malus x domestica	RLP
BGI_novel_G003978	PRGDB00211657	64.4	45	16	0	549	683	670	714	3.6e-12	72.8	Eucgr.H02157.1	Putative_R-Genes,_predicted_from_Pythozome	Eucalyptus grandis	TNL
BGI_novel_G003981	PRGDB00192408	24.8	202	131	6	1662	2243	1575	1763	6.7e-07	56.2	Mtr.17858	Putative_R-Genes,_predicted_from_NCBI_UniGene	Medicago truncatula	NL	357472002	XM_003606238	Medicago truncatula NBS resistance protein (MTR_4g055630) mRNA, complete cds
BGI_novel_G003982	PRGDB00192408	24.8	202	131	6	1047	1628	1575	1763	5.2e-07	56.2	Mtr.17858	Putative_R-Genes,_predicted_from_NCBI_UniGene	Medicago truncatula	NL	357472002	XM_003606238	Medicago truncatula NBS resistance protein (MTR_4g055630) mRNA, complete cds
BGI_novel_G004021	PRGDB00214485	74.2	128	31	1	161	538	853	980	3.6e-49	194.5	MDP0000287433	Putative_R-Genes,_predicted_from_Pythozome	Malus x domestica	CN
BGI_novel_G004024	PRGDB00200918	24.7	235	155	9	1305	1964	587	814	7.4e-10	66.2	Bra023648	Putative_R-Genes,_predicted_from_Pythozome	Brassica rapa	TNL
BGI_novel_G004025	PRGDB00202070	27.5	469	281	16	215	1489	4	457	1.6e-29	130.6	Bra027581	Putative_R-Genes,_predicted_from_Pythozome	Brassica rapa	RLK-GNK2
BGI_novel_G004082	PRGDB00191790	61.3	191	74	0	202	774	289	479	2.4e-76	285.8	Lsa.51071	Putative_R-Genes,_predicted_from_NCBI_UniGene	Lactuca sativa	N	329678974	JI581480	TSA: Lactuca sativa Letassy_X1_20535 mRNA sequence
BGI_novel_G004088	PRGDB00206908	30	110	68	1	1203	874	522	622	3.1e-07	56.6	LOC_Os02g02660.1	Putative_R-Genes,_predicted_from_Pythozome	Oryza sativa	CNL
BGI_novel_G004217	PRGWK00000006	88.3	307	36	0	1331	2251	344	650	3e-153	542.3	MELO3C002144	Contributed_R-Genes	Cucumis melo	RLK
BGI_novel_G004298	PRGDB00078600	32.7	147	65	5	953	1381	474	590	1.9e-08	60.5	Vvi.5127	Putative_R-Genes,_predicted_from_NCBI_UniGene	Vitis vinifera	RLK	225449666	XM_002264215	PREDICTED: Vitis vinifera hypothetical protein LOC100253963 (LOC100253963), mRNA
BGI_novel_G004299	PRGDB00078600	32.7	147	65	5	1468	1896	474	590	2.6e-08	60.5	Vvi.5127	Putative_R-Genes,_predicted_from_NCBI_UniGene	Vitis vinifera	RLK	225449666	XM_002264215	PREDICTED: Vitis vinifera hypothetical protein LOC100253963 (LOC100253963), mRNA
BGI_novel_G004363	PRGDB00155597	83.2	950	158	2	193	3042	20	967	0	1587.4	orange1.1g001816m	Putative_R-Genes,_predicted_from_Pythozome	Citrus sinensis	RLP			Leucine-rich receptor-like protein kinase family protein (best arabidopsis hit)
BGI_novel_G004463	PRGDB00215326	88.2	34	4	0	980	1081	1670	1703	3.7e-10	66.6	MDP0000285649	Putative_R-Genes,_predicted_from_Pythozome	Malus x domestica	NL
BGI_novel_G004464	PRGDB00215326	68.6	102	32	0	539	844	1602	1703	4.1e-33	142.9	MDP0000285649	Putative_R-Genes,_predicted_from_Pythozome	Malus x domestica	NL
BGI_novel_G004543	PRGDB00161399	65.9	41	14	0	44	166	8	48	9.8e-09	62.4	cassava4.1_000507m	Putative_R-Genes,_predicted_from_Pythozome	Vitis aestivalis	CNL			transmembrane receptors;ATP binding (best arabidopsis hit)
BGI_novel_G004544	PRGDB00177940	66.9	160	50	3	17	493	10	167	3.4e-54	211.1	POPTR_0007s04750.1	Putative_R-Genes,_predicted_from_Pythozome	Populus trichocarpa	TNL			Disease resistance protein (TIR-NBS-LRR class) family (best arabidopsis hit)
BGI_novel_G004548	PRGDB00205035	68.9	45	14	0	1923	1789	82	126	8.9e-11	68.6	Lus10000423	Putative_R-Genes,_predicted_from_Pythozome	Linum usitatissimum	TNL
BGI_novel_G004582	PRGDB00207410	45.2	146	78	1	849	1280	349	494	6.7e-30	132.1	Aquca_009_00902.1	Putative_R-Genes,_predicted_from_Pythozome	Aquilegia coerulea	RLP
BGI_novel_G004604	PRGDB00078883	32.6	172	113	2	2551	3066	175	343	9.9e-20	99	Vvi.16557	Putative_R-Genes,_predicted_from_NCBI_UniGene	Vitis vinifera	RLP	225441697	XM_002277255	PREDICTED: Vitis vinifera hypothetical protein LOC100262317 (LOC100262317), mRNA
BGI_novel_G004605	PRGDB00214485	71.8	71	20	0	5	217	910	980	9.6e-25	112.5	MDP0000287433	Putative_R-Genes,_predicted_from_Pythozome	Malus x domestica	CN
BGI_novel_G004606	PRGDB00214485	75.5	102	22	1	132	428	631	732	9.4e-38	156	MDP0000287433	Putative_R-Genes,_predicted_from_Pythozome	Malus x domestica	CN
BGI_novel_G004777	PRGDB00164261	35.3	51	30	1	2030	2173	2012	2062	3.3	33.9	Glyma16g23790.1	Putative_R-Genes,_predicted_from_Pythozome	Glycine max	CNL			transmembrane receptors;ATP binding (best arabidopsis hit)
BGI_novel_G004793	PRGDB00216650	27.8	284	142	10	835	1647	1011	1244	3.1e-19	97.1	MDP0000252094	Putative_R-Genes,_predicted_from_Pythozome	Malus x domestica	RLP
BGI_novel_G004812	PRGDB00173220	75.6	509	121	3	856	2379	75	581	2.2e-214	745.7	ppa003371m	Putative_R-Genes,_predicted_from_Pythozome	Prunus persica	RLP			Leucine-rich repeat protein kinase family protein (best arabidopsis hit)
BGI_novel_G004825	PRGDB00073072	26.9	67	49	0	395	595	550	616	0.11	37.7	Os.80143	Putative_R-Genes,_predicted_from_NCBI_UniGene	Oryza sativa Japonica Group	CNL	32975074	AK065056	Oryza sativa Japonica Group cDNA clone:J013001J06, full insert sequence
BGI_novel_G004846	PRGDB00184271	89.4	47	4	1	304	444	662	707	3e-17	89.7	GRMZM2G162531_T01	Putative_R-Genes,_predicted_from_Pythozome	Zea mays	RLP			STRUBBELIG-receptor family 8 (best arabidopsis hit); STRUBBELIG-RECEPTOR FAMILY 7 precursor, putative, expressed (best rice hit)
BGI_novel_G004873	PRGDB00183610	63.1	982	328	6	30	2906	1	971	0	1215.3	GSVIVT01021289001	Putative_R-Genes,_predicted_from_Pythozome	Vitis vinifera	RLP			Leucine-rich repeat transmembrane protein kinase (best arabidopsis hit)
BGI_novel_G004875	PRGDB00183610	64.6	982	336	5	98	3040	1	971	0	1258.4	GSVIVT01021289001	Putative_R-Genes,_predicted_from_Pythozome	Vitis vinifera	RLP			Leucine-rich repeat transmembrane protein kinase (best arabidopsis hit)
BGI_novel_G004876	PRGDB00173600	67.1	642	208	2	1575	3497	365	1004	4.2e-251	867.8	ppa000741m	Putative_R-Genes,_predicted_from_Pythozome	Prunus persica	RLP			Leucine-rich repeat transmembrane protein kinase (best arabidopsis hit)
BGI_novel_G004877	PRGDB00173600	67.9	604	191	2	1964	3772	403	1004	8.8e-239	827	ppa000741m	Putative_R-Genes,_predicted_from_Pythozome	Prunus persica	RLP			Leucine-rich repeat transmembrane protein kinase (best arabidopsis hit)
BGI_novel_G004879	PRGDB00173600	76	292	65	1	776	1636	688	979	1e-126	453.8	ppa000741m	Putative_R-Genes,_predicted_from_Pythozome	Prunus persica	RLP			Leucine-rich repeat transmembrane protein kinase (best arabidopsis hit)
BGI_novel_G004880	PRGDB00173600	76	292	65	1	1539	2399	688	979	1.4e-126	453.8	ppa000741m	Putative_R-Genes,_predicted_from_Pythozome	Prunus persica	RLP			Leucine-rich repeat transmembrane protein kinase (best arabidopsis hit)
BGI_novel_G004887	PRGDB00173600	67.2	668	214	3	1580	3574	320	985	1.6e-261	902.5	ppa000741m	Putative_R-Genes,_predicted_from_Pythozome	Prunus persica	RLP			Leucine-rich repeat transmembrane protein kinase (best arabidopsis hit)
BGI_novel_G004891	PRGDB00183610	68.8	666	204	3	1483	3477	314	976	1.6e-261	902.5	GSVIVT01021289001	Putative_R-Genes,_predicted_from_Pythozome	Vitis vinifera	RLP			Leucine-rich repeat transmembrane protein kinase (best arabidopsis hit)
BGI_novel_G004893	PRGDB00183610	62.6	760	273	5	131	2410	5	753	7.1e-275	946.8	GSVIVT01021289001	Putative_R-Genes,_predicted_from_Pythozome	Vitis vinifera	RLP			Leucine-rich repeat transmembrane protein kinase (best arabidopsis hit)
BGI_novel_G004894	PRGDB00183610	62.6	760	273	5	146	2425	5	753	7.6e-275	946.8	GSVIVT01021289001	Putative_R-Genes,_predicted_from_Pythozome	Vitis vinifera	RLP			Leucine-rich repeat transmembrane protein kinase (best arabidopsis hit)
BGI_novel_G004895	PRGDB00183610	67	530	172	2	2034	3623	314	840	2.5e-200	699.5	GSVIVT01021289001	Putative_R-Genes,_predicted_from_Pythozome	Vitis vinifera	RLP			Leucine-rich repeat transmembrane protein kinase (best arabidopsis hit)
BGI_novel_G004900	PRGDB00163358	64.3	1005	337	11	98	3079	1	994	0	1250	cassava4.1_030745m	Putative_R-Genes,_predicted_from_Pythozome	Vitis aestivalis	RLP			receptor-like kinase in flowers 1 (best arabidopsis hit)
BGI_novel_G004917	PRGDB00215267	49.1	57	24	2	337	492	312	368	2.2e-07	56.6	MDP0000256952	Putative_R-Genes,_predicted_from_Pythozome	Malus x domestica	RLP
BGI_novel_G004926	PRGDB00215095	33.2	563	313	10	467	2119	23	534	2.7e-78	293.1	MDP0000319352	Putative_R-Genes,_predicted_from_Pythozome	Malus x domestica	TNL
BGI_novel_G004933	PRGDB00189975	37.5	88	46	4	543	800	1514	1594	2e-07	56.6	Hv.37291	Putative_R-Genes,_predicted_from_NCBI_UniGene	Hordeum vulgare	NL	326489646	AK370605	Hordeum vulgare subsp. vulgare mRNA for predicted protein, complete cds, clone: NIASHv2113B23
BGI_novel_G004938	PRGDB00152666	65.4	52	18	0	348	503	532	583	4.1e-12	71.6	orange1.1g038671m	Putative_R-Genes,_predicted_from_Pythozome	Citrus sinensis	RLP			Leucine-rich repeat receptor-like protein kinase family protein (best arabidopsis hit)
BGI_novel_G004956	PRGDB00199472	37.5	176	102	4	1608	2117	847	1020	4.5e-23	109.8	Pavirv00061359m	Putative_R-Genes,_predicted_from_Pythozome	Panicum virgatum	NL
BGI_novel_G005001	PRGDB00068487	83.4	223	37	0	308	976	48	270	9e-103	375.2	Ghi.11098	Putative_R-Genes,_predicted_from_NCBI_UniGene	Gossypium hirsutum	NL	109855502	DW484481	GH_RMIRS_047_F02_006_R Cotton Normalized Library random primed Gossypium hirsutum cDNA, mRNA sequence
BGI_novel_G005003	PRGDB00162094	43.8	1288	659	23	326	4111	1	1249	7.1e-274	943.7	cassava4.1_029580m	Putative_R-Genes,_predicted_from_Pythozome	Vitis aestivalis	NL			LRR and NB-ARC domains-containing disease resistance protein (best arabidopsis hit)
BGI_novel_G005072	PRGDB00186818	35.9	103	48	4	556	858	1141	1227	0.0018	45.4		Putative_R-Genes,_collected_from_NCBI_Protein	Vitis vinifera	NL	359487181	XM_003633480	PREDICTED: Vitis vinifera putative disease resistance protein At3g14460-like (LOC100256694), mRNA.
BGI_novel_G005104	PRGDB00165925	55.6	72	31	1	1359	1571	413	484	6.1e-11	69.3	cassava4.1_022908m	Putative_R-Genes,_predicted_from_Pythozome	Vitis aestivalis	CNL			NB-ARC domain-containing disease resistance protein (best arabidopsis hit)
BGI_novel_G005114	PRGDB00165925	47	423	217	6	755	2017	6	423	1.7e-100	367.9	cassava4.1_022908m	Putative_R-Genes,_predicted_from_Pythozome	Vitis aestivalis	CNL			NB-ARC domain-containing disease resistance protein (best arabidopsis hit)
BGI_novel_G005122	PRGDB00149954	44.4	99	53	1	636	932	6	102	6.8e-18	93.2	clementine0.9_001471m	Putative_R-Genes,_predicted_from_Pythozome	Citrus clementina	CNL			NB-ARC domain-containing disease resistance protein (best arabidopsis hit)
BGI_novel_G005123	PRGDB00149962	45	140	73	3	524	940	6	142	3.3e-25	115.9	clementine0.9_033891m	Putative_R-Genes,_predicted_from_Pythozome	Citrus clementina	CNL			NB-ARC domain-containing disease resistance protein (best arabidopsis hit)
BGI_novel_G005124	PRGDB00149962	45	140	73	3	631	1047	6	142	3.6e-25	115.9	clementine0.9_033891m	Putative_R-Genes,_predicted_from_Pythozome	Citrus clementina	CNL			NB-ARC domain-containing disease resistance protein (best arabidopsis hit)
BGI_novel_G005136	PRGDB00176284	25.3	257	149	12	2840	3580	882	1105	0.00064	47	29666.m001447	Putative_R-Genes,_predicted_from_Pythozome	Oryza barthii	NL			NB-ARC domain-containing disease resistance protein (best arabidopsis hit)
BGI_novel_G005155	PRGDB00149743	48.5	778	368	14	380	2635	52	822	3.3e-187	656	clementine0.9_000634m	Putative_R-Genes,_predicted_from_Pythozome	Citrus clementina	CNL			NB-ARC domain-containing disease resistance protein (best arabidopsis hit)
BGI_novel_G005161	PRGDB00162702	52.9	70	33	0	2	211	410	479	4.4e-17	89.7	cassava4.1_032094m	Putative_R-Genes,_predicted_from_Pythozome	Vitis aestivalis	NL			LRR and NB-ARC domains-containing disease resistance protein (best arabidopsis hit)
BGI_novel_G005162	PRGDB00153099	37.5	741	424	15	2	2158	672	1395	2.8e-121	436	orange1.1g000594m	Putative_R-Genes,_predicted_from_Pythozome	Citrus sinensis	CNL			LRR and NB-ARC domains-containing disease resistance protein (best arabidopsis hit)
BGI_novel_G005164	PRGDB00187911	43.3	194	103	3	47	619	1005	1194	2.8e-46	185.7	Ta.74193	Putative_R-Genes,_predicted_from_NCBI_UniGene	Triticum aestivum	RLP	241988090	AK335347	Triticum aestivum cDNA, clone: WT012_K21, cultivar: Chinese Spring
BGI_novel_G005174	PRGDB00215267	37.7	77	47	1	1452	1682	463	538	2.1e-07	57.4	MDP0000256952	Putative_R-Genes,_predicted_from_Pythozome	Malus x domestica	RLP
BGI_novel_G005177	PRGDB00178373	54.1	157	72	0	1904	1434	1	157	7.4e-45	181.8	POPTR_0672s00200.1	Putative_R-Genes,_predicted_from_Pythozome	Populus trichocarpa	RLP			Leucine-rich repeat protein kinase family protein (best arabidopsis hit)
BGI_novel_G005212	PRGDB00061522	30.4	217	101	4	73	681	255	435	8.4e-20	97.1	disease resistance protein	Putative_R-Genes,_collected_from_NCBI_Protein	Brassica rapa subsp. pekinensis	NL	227438216	FJ842817	Brassica rapa subsp. pekinensis isolate BrNL12 disease resistance protein gene, complete cds.
BGI_novel_G005215	PRGDB00215267	40.2	122	69	2	1094	1450	667	787	4.7e-13	76.6	MDP0000256952	Putative_R-Genes,_predicted_from_Pythozome	Malus x domestica	RLP
BGI_novel_G005262	PRGDB00148403	36.2	58	37	0	1091	918	1384	1441	6.2e-07	55.5	clementine0.9_035959m	Putative_R-Genes,_predicted_from_Pythozome	Citrus clementina	CNL			NB-ARC domain-containing disease resistance protein (best arabidopsis hit)
BGI_novel_G005288	PRGDB00201456	77.1	48	11	0	202	345	359	406	4e-14	78.6	Bra016026	Putative_R-Genes,_predicted_from_Pythozome	Brassica rapa	CN
BGI_novel_G005323	PRGDB00148403	24.4	308	206	6	149	1024	1358	1654	7.6e-17	88.2	clementine0.9_035959m	Putative_R-Genes,_predicted_from_Pythozome	Citrus clementina	CNL			NB-ARC domain-containing disease resistance protein (best arabidopsis hit)
BGI_novel_G005333	PRGDB00077609	38.2	55	34	0	470	634	214	268	2.7e-06	52.8	Ta.25393	Putative_R-Genes,_predicted_from_NCBI_UniGene	Triticum aestivum	N	241983377	AK331317	Triticum aestivum cDNA, clone: WT007_D05, cultivar: Chinese Spring
BGI_novel_G005398	PRGDB00185523	64.3	235	61	1	297	1001	413	624	1.2e-78	293.5	GRMZM2G062042_T02	Putative_R-Genes,_predicted_from_Pythozome	Zea mays	CN			Clathrin, heavy chain (best arabidopsis hit); clathrin heavy chain, putative, expressed (best rice hit)
BGI_novel_G005402	PRGDB00079047	54.8	62	22	3	1096	1272	28	86	4.7e-07	57.4	Vvi.24310	Putative_R-Genes,_predicted_from_NCBI_UniGene	Vitis vinifera	Mlo-like	225435268	XM_002282180	PREDICTED: Vitis vinifera MLO13 protein (MLO13), mRNA
BGI_novel_G005403	PRGDB00150708	56.8	169	44	2	254	673	3	171	1.2e-45	183	evm.TU.contig_28125.4	Putative_R-Genes,_predicted_from_Pythozome	Arabidopsis lyrata subsp. lyrata	Mlo-like			Seven transmembrane MLO family protein (best arabidopsis hit)
BGI_novel_G005487	PRGDB00061511	46.6	247	132	0	1	741	2353	2599	9.6e-63	241.1	disease resistance protein	Putative_R-Genes,_collected_from_NCBI_Protein	Brassica rapa subsp. pekinensis	TNL	227438238	FJ842828	Brassica rapa subsp. pekinensis isolate BrTNL10 disease resistance protein gene, complete cds.
BGI_novel_G005501	PRGDB00189975	38.2	89	46	4	368	628	1514	1595	2.7e-08	59.3	Hv.37291	Putative_R-Genes,_predicted_from_NCBI_UniGene	Hordeum vulgare	NL	326489646	AK370605	Hordeum vulgare subsp. vulgare mRNA for predicted protein, complete cds, clone: NIASHv2113B23
BGI_novel_G005526	PRGDB00174964	53.2	94	42	1	468	749	35	126	2.6e-23	110.9	POPTR_0115s00250.1	Putative_R-Genes,_predicted_from_Pythozome	Populus trichocarpa	NL			LRR and NB-ARC domains-containing disease resistance protein (best arabidopsis hit)
BGI_novel_G005529	PRGDB00174964	53.2	94	42	1	901	1182	35	126	3e-23	110.9	POPTR_0115s00250.1	Putative_R-Genes,_predicted_from_Pythozome	Populus trichocarpa	NL			LRR and NB-ARC domains-containing disease resistance protein (best arabidopsis hit)
BGI_novel_G005533	PRGDB00174964	53.2	94	42	1	890	1171	35	126	3e-23	110.9	POPTR_0115s00250.1	Putative_R-Genes,_predicted_from_Pythozome	Populus trichocarpa	NL			LRR and NB-ARC domains-containing disease resistance protein (best arabidopsis hit)
BGI_novel_G005558	PRGDB00061522	34.2	120	77	1	953	600	316	435	2.8e-11	70.9	disease resistance protein	Putative_R-Genes,_collected_from_NCBI_Protein	Brassica rapa subsp. pekinensis	NL	227438216	FJ842817	Brassica rapa subsp. pekinensis isolate BrNL12 disease resistance protein gene, complete cds.
BGI_novel_G005575	PRGDB00148403	34	103	62	2	1076	771	1360	1457	2.3e-07	57.4	clementine0.9_035959m	Putative_R-Genes,_predicted_from_Pythozome	Citrus clementina	CNL			NB-ARC domain-containing disease resistance protein (best arabidopsis hit)
BGI_novel_G005577	PRGDB00078600	28.3	219	150	3	888	1529	371	587	6.1e-17	89.4	Vvi.5127	Putative_R-Genes,_predicted_from_NCBI_UniGene	Vitis vinifera	RLK	225449666	XM_002264215	PREDICTED: Vitis vinifera hypothetical protein LOC100253963 (LOC100253963), mRNA
BGI_novel_G005578	PRGDB00078600	28.3	219	150	3	919	1560	371	587	6.2e-17	89.4	Vvi.5127	Putative_R-Genes,_predicted_from_NCBI_UniGene	Vitis vinifera	RLK	225449666	XM_002264215	PREDICTED: Vitis vinifera hypothetical protein LOC100253963 (LOC100253963), mRNA
BGI_novel_G005598	PRGDB00189975	48.8	217	94	8	563	1195	1390	1595	6.1e-47	188.3	Hv.37291	Putative_R-Genes,_predicted_from_NCBI_UniGene	Hordeum vulgare	NL	326489646	AK370605	Hordeum vulgare subsp. vulgare mRNA for predicted protein, complete cds, clone: NIASHv2113B23
BGI_novel_G005601	PRGDB00078883	38.2	55	28	1	2561	2397	355	403	21	32.3	Vvi.16557	Putative_R-Genes,_predicted_from_NCBI_UniGene	Vitis vinifera	RLP	225441697	XM_002277255	PREDICTED: Vitis vinifera hypothetical protein LOC100262317 (LOC100262317), mRNA
BGI_novel_G005730	PRGDB00186217	27	311	192	8	2587	3492	1487	1771	1.3e-19	99	GRMZM2G381429_T01	Putative_R-Genes,_predicted_from_Pythozome	Zea mays	NL			NB-ARC domain-containing disease resistance protein (best arabidopsis hit); resistance protein, putative, expressed (best rice hit)
BGI_novel_G005779	PRGDB00078883	37.3	169	102	2	851	1348	262	429	1.7e-16	88.6	Vvi.16557	Putative_R-Genes,_predicted_from_NCBI_UniGene	Vitis vinifera	RLP	225441697	XM_002277255	PREDICTED: Vitis vinifera hypothetical protein LOC100262317 (LOC100262317), mRNA
BGI_novel_G005806	PRGDB00078883	32.3	303	200	2	1597	2496	168	468	2.5e-36	154.5	Vvi.16557	Putative_R-Genes,_predicted_from_NCBI_UniGene	Vitis vinifera	RLP	225441697	XM_002277255	PREDICTED: Vitis vinifera hypothetical protein LOC100262317 (LOC100262317), mRNA
BGI_novel_G005815	PRGDB00186217	25.9	305	194	6	286	1173	1491	1772	2e-17	90.1	GRMZM2G381429_T01	Putative_R-Genes,_predicted_from_Pythozome	Zea mays	NL			NB-ARC domain-containing disease resistance protein (best arabidopsis hit); resistance protein, putative, expressed (best rice hit)
BGI_novel_G005849	PRGDB00206903	27.7	155	109	2	2849	3313	336	487	1.1e-10	69.3	LOC_Os02g16090.1	Putative_R-Genes,_predicted_from_Pythozome	Oryza sativa	CN
BGI_novel_G005856	PRGDB00061522	25	208	149	2	438	1040	22	229	1.1e-11	71.6	disease resistance protein	Putative_R-Genes,_collected_from_NCBI_Protein	Brassica rapa subsp. pekinensis	NL	227438216	FJ842817	Brassica rapa subsp. pekinensis isolate BrNL12 disease resistance protein gene, complete cds.
BGI_novel_G005921	PRGDB00072281	30.8	107	70	2	290	610	1011	1113	2e-07	57.8	Os.27702	Putative_R-Genes,_predicted_from_NCBI_UniGene	Oryza sativa Japonica Group	CNL	37988273	AK111610	Oryza sativa Japonica Group cDNA clone:J013100B16, full insert sequence
BGI_novel_G005973	PRGDB00061522	40.2	112	67	0	1151	1486	331	442	9e-16	85.1	disease resistance protein	Putative_R-Genes,_collected_from_NCBI_Protein	Brassica rapa subsp. pekinensis	NL	227438216	FJ842817	Brassica rapa subsp. pekinensis isolate BrNL12 disease resistance protein gene, complete cds.
BGI_novel_G005974	PRGDB00184336	39.3	89	51	2	4	261	548	636	7.1e-10	65.1	GSVIVT01034745001	Putative_R-Genes,_predicted_from_Pythozome	Vitis vinifera	N			pleiotropic drug resistance 11 (best arabidopsis hit)
BGI_novel_G006006	PRGDB00070731	47.4	78	32	3	394	603	6	82	9.8e-10	64.3	Mdo.689	Putative_R-Genes,_predicted_from_NCBI_UniGene	Malus x domestica	T	292668962	GU732467	Malus x domestica AP2 domain class transcription factor (AP2D43) mRNA, complete cds
BGI_novel_G006040	PRGDB00216981	63.5	419	121	4	170	1363	1	408	3.4e-146	519.2	MDP0000297928	Putative_R-Genes,_predicted_from_Pythozome	Malus x domestica	RLP
BGI_novel_G006058	PRGDB00190653	39.6	356	187	3	276	1259	197	552	7e-55	214.9	Lsa.23604	Putative_R-Genes,_predicted_from_NCBI_UniGene	Lactuca sativa	RLP	329671671	JI574177	TSA: Lactuca sativa Letassy_X1_19943 mRNA sequence
BGI_novel_G006060	PRGDB00182817	74	150	39	0	686	237	220	369	9.7e-59	226.9	GSVIVT01000641001	Putative_R-Genes,_predicted_from_Pythozome	Vitis vinifera	NL			NB-ARC domain-containing disease resistance protein (best arabidopsis hit)
BGI_novel_G006070	PRGDB00195542	66.8	289	95	1	3	869	517	804	9.1e-110	396.4	Phvulv091020956m	Putative_R-Genes,_predicted_from_Pythozome	Phaseolus vulgaris	RLP
BGI_novel_G006073	PRGDB00155344	49.6	135	68	0	9	413	302	436	3.6e-27	122.1	Egrandis_v1_0.049773m	Putative_R-Genes,_predicted_from_Pythozome	Areca catechu	RLP			Leucine-rich repeat receptor-like protein kinase family protein (best arabidopsis hit)
BGI_novel_G006074	PRGDB00178121	60.6	246	85	4	2	727	579	816	1.8e-77	289.3	POPTR_0002s12270.1	Putative_R-Genes,_predicted_from_Pythozome	Populus trichocarpa	RLP			Leucine-rich repeat receptor-like protein kinase family protein (best arabidopsis hit)
BGI_novel_G006075	PRGDB00178296	38.9	190	63	4	136	549	17	205	2.9e-24	112.1	POPTR_0002s00920.1	Putative_R-Genes,_predicted_from_Pythozome	Populus trichocarpa	RLP			Protein kinase family protein with leucine-rich repeat domain (best arabidopsis hit)
BGI_novel_G006088	PRGDB00202237	97.6	41	1	0	482	604	1758	1798	2.1e-16	86.3	Bra017241	Putative_R-Genes,_predicted_from_Pythozome	Brassica rapa	N
BGI_novel_G006089	PRGDB00202237	97.6	41	1	0	778	900	1758	1798	2.7e-16	86.3	Bra017241	Putative_R-Genes,_predicted_from_Pythozome	Brassica rapa	N
BGI_novel_G006092	PRGDB00147868	48.6	35	18	0	2212	2316	785	819	0.0063	42.7	clementine0.9_027599m	Putative_R-Genes,_predicted_from_Pythozome	Citrus clementina	RLP			Leucine-rich repeat receptor-like protein kinase family protein (best arabidopsis hit)
BGI_novel_G006104	PRGDB00215267	36.9	111	65	4	278	601	720	828	4.3e-07	57.8	MDP0000256952	Putative_R-Genes,_predicted_from_Pythozome	Malus x domestica	RLP
BGI_novel_G006129	PRGDB00202169	46.6	58	31	0	875	1048	40	97	5.2e-09	63.2	Bra007015	Putative_R-Genes,_predicted_from_Pythozome	Brassica rapa	RLP
BGI_novel_G006147	PRGDB00186217	24.5	322	181	8	2483	3394	1491	1768	1.8e-17	91.7	GRMZM2G381429_T01	Putative_R-Genes,_predicted_from_Pythozome	Zea mays	NL			NB-ARC domain-containing disease resistance protein (best arabidopsis hit); resistance protein, putative, expressed (best rice hit)
BGI_novel_G006183	PRGDB00063306	23.4	145	99	3	443	853	663	803	1.9e-07	57	hypothetical protein	Putative_R-Genes,_collected_from_NCBI_Protein	Oryza sativa Japonica Group	NL	297728740	NM_001189805	Oryza sativa Japonica Group Os11g0699100 (Os11g0699100) mRNA, complete cds.
BGI_novel_G006208	PRGDB00204876	54.8	62	26	2	1642	1824	1440	1500	1.6e-09	65.1	Lus10019708	Putative_R-Genes,_predicted_from_Pythozome	Linum usitatissimum	TNL
BGI_novel_G006209	PRGDB00204876	54.8	62	26	2	746	928	1440	1500	1.2e-09	65.1	Lus10019708	Putative_R-Genes,_predicted_from_Pythozome	Linum usitatissimum	TNL
BGI_novel_G006211	PRGDB00204876	54.8	62	26	2	711	893	1440	1500	8.8e-10	65.1	Lus10019708	Putative_R-Genes,_predicted_from_Pythozome	Linum usitatissimum	TNL
BGI_novel_G006216	PRGDB00049879	30.6	196	105	3	395	922	2644	2828	5.4e-16	85.9	Os11g0686400	Putative_R-Genes,_collected_from_NCBI_Protein	Oryza sativa Japonica Group	CNL	115486666	NM_001075009	Oryza sativa (japonica cultivar-group) Os11g0686400 (Os11g0686400) mRNA, complete cds.
BGI_novel_G006230	PRGDB00192523	41.7	120	69	1	5	361	64	183	8.8e-25	113.2	Mtr.24619	Putative_R-Genes,_predicted_from_NCBI_UniGene	Medicago truncatula	RLP	357513572	XM_003627027	Medicago truncatula Receptor-like protein kinase (MTR_8g014820) mRNA, complete cds
BGI_novel_G006231	PRGDB00215944	61.2	80	27	2	837	1064	1693	1772	2e-21	103.2	MDP0000282838	Putative_R-Genes,_predicted_from_Pythozome	Malus x domestica	CN
BGI_novel_G006237	PRGDB00211657	70.5	44	13	0	280	411	670	713	8.1e-12	70.9	Eucgr.H02157.1	Putative_R-Genes,_predicted_from_Pythozome	Eucalyptus grandis	TNL
BGI_novel_G006342	PRGDB00078883	32.5	237	156	2	222	923	231	466	1.8e-23	111.3	Vvi.16557	Putative_R-Genes,_predicted_from_NCBI_UniGene	Vitis vinifera	RLP	225441697	XM_002277255	PREDICTED: Vitis vinifera hypothetical protein LOC100262317 (LOC100262317), mRNA
BGI_novel_G006410	PRGDB00200844	66.7	60	19	1	200	376	314	373	6e-15	81.3	Bra008427	Putative_R-Genes,_predicted_from_Pythozome	Brassica rapa	RLP
BGI_novel_G006496	PRGDB00148025	26.6	398	217	12	698	1702	411	796	2.7e-16	87	clementine0.9_000455m	Putative_R-Genes,_predicted_from_Pythozome	Citrus clementina	NL			LRR and NB-ARC domains-containing disease resistance protein (best arabidopsis hit)
BGI_novel_G006539	PRGDB00213858	32.2	199	126	5	2538	3110	757	954	6.8e-13	77	MDP0000378930	Putative_R-Genes,_predicted_from_Pythozome	Malus x domestica	TNL
BGI_novel_G006542	PRGDB00062618	38.3	222	110	5	33	620	592	812	1.4e-27	124.8	tir-nbs-lrr resistance protein	Putative_R-Genes,_collected_from_NCBI_Protein	Populus trichocarpa	TNL	224145029	XM_002325465	Populus trichocarpa tir-nbs-lrr resistance protein, mRNA.
BGI_novel_G006543	PRGDB00149757	28.4	225	131	9	2023	2616	758	979	9.1e-08	59.7	evm.model.supercontig_2.253	Putative_R-Genes,_predicted_from_Pythozome	Arabidopsis lyrata subsp. lyrata	TNL			disease resistance protein (TIR-NBS-LRR class), putative (best arabidopsis hit)
BGI_novel_G006546	PRGDB00149757	28.4	225	131	9	1985	2578	758	979	9e-08	59.7	evm.model.supercontig_2.253	Putative_R-Genes,_predicted_from_Pythozome	Arabidopsis lyrata subsp. lyrata	TNL			disease resistance protein (TIR-NBS-LRR class), putative (best arabidopsis hit)
BGI_novel_G006547	PRGDB00062680	41.5	518	263	11	119	1642	12	499	1.1e-96	355.1	tir-nbs-lrr resistance protein	Putative_R-Genes,_collected_from_NCBI_Protein	Populus trichocarpa	TNL	224127916	XM_002329173	Populus trichocarpa tir-nbs-lrr resistance protein, mRNA.
BGI_novel_G006553	PRGDB00162680	25.5	466	265	15	6	1334	650	1056	1.1e-22	108.2	cassava4.1_032150m	Putative_R-Genes,_predicted_from_Pythozome	Vitis aestivalis	TNL			disease resistance protein (TIR-NBS-LRR class), putative (best arabidopsis hit)
BGI_novel_G006557	PRGDB00149582	41.1	625	345	12	224	2044	16	635	3.2e-121	436.8	clementine0.9_000801m	Putative_R-Genes,_predicted_from_Pythozome	Citrus clementina	TNL			disease resistance protein (TIR-NBS-LRR class), putative (best arabidopsis hit)
BGI_novel_G006565	PRGDB00149758	42.4	165	90	4	106	600	20	179	4.5e-27	124	evm.model.supercontig_2.255	Putative_R-Genes,_predicted_from_Pythozome	Arabidopsis lyrata subsp. lyrata	CNL			disease resistance protein (TIR-NBS-LRR class), putative (best arabidopsis hit)
BGI_novel_G006579	PRGDB00183044	71.3	893	246	4	224	2899	68	951	0	1297.7	GSVIVT01008042001	Putative_R-Genes,_predicted_from_Pythozome	Vitis vinifera	N			ATP-binding cassette A2 (best arabidopsis hit)
BGI_novel_G006581	PRGDB00204891	75.2	242	59	1	66	788	740	981	8.3e-100	364	Lus10020500	Putative_R-Genes,_predicted_from_Pythozome	Linum usitatissimum	RLP
BGI_novel_G006587	PRGDB00215191	74.1	81	21	0	407	649	924	1004	1e-29	130.6	MDP0000254848	Putative_R-Genes,_predicted_from_Pythozome	Malus x domestica	RLK-GNK2
BGI_novel_G006588	PRGDB00215191	73.3	75	20	0	399	623	930	1004	7.9e-27	120.9	MDP0000254848	Putative_R-Genes,_predicted_from_Pythozome	Malus x domestica	RLK-GNK2
BGI_novel_G006590	PRGDB00199472	34.5	165	99	5	167	646	849	1009	4.3e-16	85.5	Pavirv00061359m	Putative_R-Genes,_predicted_from_Pythozome	Panicum virgatum	NL
BGI_novel_G006603	PRGDB00175646	72.4	98	27	0	23	316	1	98	1.9e-35	152.1	POPTR_0014s01150.1	Putative_R-Genes,_predicted_from_Pythozome	Populus trichocarpa	CNL			LRR and NB-ARC domains-containing disease resistance protein (best arabidopsis hit)
BGI_novel_G006615	PRGDB00078600	42.9	70	40	0	1838	1629	432	501	6.4e-05	49.3	Vvi.5127	Putative_R-Genes,_predicted_from_NCBI_UniGene	Vitis vinifera	RLK	225449666	XM_002264215	PREDICTED: Vitis vinifera hypothetical protein LOC100253963 (LOC100253963), mRNA
BGI_novel_G006627	PRGDB00215267	34.1	334	203	8	122	1105	720	1042	5.8e-42	172.2	MDP0000256952	Putative_R-Genes,_predicted_from_Pythozome	Malus x domestica	RLP
BGI_novel_G006634	PRGDB00151049	31.8	110	74	1	290	616	2	111	9.1e-07	54.3	Cre12.g532050.t1.1	Putative_R-Genes,_predicted_from_Pythozome	Chlamydomonas reinhardtii	N			U-box domain-containing protein kinase family protein (best arabidopsis hit)
BGI_novel_G006670	PRGDB00215267	28.2	188	131	3	1335	1889	713	899	3.3e-13	76.6	MDP0000256952	Putative_R-Genes,_predicted_from_Pythozome	Malus x domestica	RLP
BGI_novel_G006678	PRGDB00147219	73.2	56	15	0	1903	2070	53	108	4.5e-18	93.2	Bradi4g25570.1	Putative_R-Genes,_predicted_from_Pythozome	Ricinus communis	CN			Clathrin, heavy chain (best arabidopsis hit); clathrin heavy chain, putative, expressed (best rice hit)
BGI_novel_G006717	PRGDB00215267	40.7	199	113	3	74	664	704	899	3.5e-33	142.9	MDP0000256952	Putative_R-Genes,_predicted_from_Pythozome	Malus x domestica	RLP
BGI_novel_G006749	PRGDB00215267	35	237	142	7	343	1035	704	934	1.4e-28	129.4	MDP0000256952	Putative_R-Genes,_predicted_from_Pythozome	Malus x domestica	RLP
BGI_novel_G006799	PRGDB00206906	31.9	144	97	1	1787	1356	1595	1737	1.7e-11	70.9	LOC_Os02g20420.1	Putative_R-Genes,_predicted_from_Pythozome	Oryza sativa	CNL
BGI_novel_G006810	PRGDB00196775	25.5	165	104	5	88	525	1110	1274	1.5e-07	57	Phvulv091001300m	Putative_R-Genes,_predicted_from_Pythozome	Phaseolus vulgaris	TNL
BGI_novel_G006812	PRGDB00216316	83.3	36	6	0	397	504	330	365	1.1e-10	67	MDP0000248430	Putative_R-Genes,_predicted_from_Pythozome	Malus x domestica	N
BGI_novel_G006846	PRGDB00061522	51.4	175	81	3	2352	2864	575	749	4.8e-42	173.3	disease resistance protein	Putative_R-Genes,_collected_from_NCBI_Protein	Brassica rapa subsp. pekinensis	NL	227438216	FJ842817	Brassica rapa subsp. pekinensis isolate BrNL12 disease resistance protein gene, complete cds.
BGI_novel_G006860	PRGDB00149954	40.1	237	136	3	1	699	4	238	2.7e-41	170.6	clementine0.9_001471m	Putative_R-Genes,_predicted_from_Pythozome	Citrus clementina	CNL			NB-ARC domain-containing disease resistance protein (best arabidopsis hit)
BGI_novel_G006861	PRGDB00213197	55.8	113	49	1	1349	1687	576	687	7.4e-29	129.4	MDP0000309582	Putative_R-Genes,_predicted_from_Pythozome	Malus x domestica	NL
BGI_novel_G006865	PRGDB00148643	46.3	82	40	2	265	507	3	81	7.9e-14	77.4	clementine0.9_001366m	Putative_R-Genes,_predicted_from_Pythozome	Citrus clementina	RLP			Leucine-rich repeat transmembrane protein kinase (best arabidopsis hit)
BGI_novel_G006878	PRGDB00149481	51.6	675	318	8	229	2235	17	688	1.4e-180	633.3	clementine0.9_036043m	Putative_R-Genes,_predicted_from_Pythozome	Citrus clementina	TNL			disease resistance protein (TIR-NBS-LRR class), putative (best arabidopsis hit)
BGI_novel_G006879	PRGDB00149454	45.2	332	178	4	1109	2098	21	350	5.6e-71	269.6	clementine0.9_034751m	Putative_R-Genes,_predicted_from_Pythozome	Citrus clementina	NL			disease resistance protein (TIR-NBS-LRR class), putative (best arabidopsis hit)
BGI_novel_G006880	PRGDB00156452	63.3	90	33	0	166	435	13	102	6.8e-26	119.8	orange1.1g000943m	Putative_R-Genes,_predicted_from_Pythozome	Citrus sinensis	TNL			disease resistance protein (TIR-NBS-LRR class), putative (best arabidopsis hit)
BGI_novel_G006886	PRGDB00166209	49.1	540	271	3	160	1773	25	562	1.4e-150	533.9	cassava4.1_028330m	Putative_R-Genes,_predicted_from_Pythozome	Vitis aestivalis	TNL			disease resistance protein (TIR-NBS-LRR class), putative (best arabidopsis hit)
BGI_novel_G006887	PRGDB00166209	49.1	540	271	3	156	1769	25	562	1.5e-150	533.9	cassava4.1_028330m	Putative_R-Genes,_predicted_from_Pythozome	Vitis aestivalis	TNL			disease resistance protein (TIR-NBS-LRR class), putative (best arabidopsis hit)
BGI_novel_G006903	PRGDB00148294	48.8	648	291	11	77	1948	1	631	5.9e-152	538.9	clementine0.9_000338m	Putative_R-Genes,_predicted_from_Pythozome	Citrus clementina	NL			LRR and NB-ARC domains-containing disease resistance protein (best arabidopsis hit)
BGI_novel_G006907	PRGDB00177403	49.4	81	41	0	1129	887	1	81	1.2e-14	80.9	30063.m001415	Putative_R-Genes,_predicted_from_Pythozome	Oryza barthii	NL			LRR and NB-ARC domains-containing disease resistance protein (best arabidopsis hit)
BGI_novel_G006908	PRGDB00176188	55.4	65	25	1	90	272	1	65	3.2e-12	71.6	29609.m000594	Putative_R-Genes,_predicted_from_Pythozome	Oryza barthii	NL			NB-ARC domain-containing disease resistance protein (best arabidopsis hit)
BGI_novel_G006914	PRGDB00216296	31.6	136	67	5	443	826	542	659	0.00079	45.4	MDP0000292810	Putative_R-Genes,_predicted_from_Pythozome	Malus x domestica	NL
BGI_novel_G006915	PRGDB00216296	31.6	136	67	5	1425	1808	542	659	0.0012	45.4	MDP0000292810	Putative_R-Genes,_predicted_from_Pythozome	Malus x domestica	NL
BGI_novel_G006924	PRGDB00062313	30.9	94	58	2	972	1232	613	706	0.58	36.2	Disease resistance protein RGA2, putative	Putative_R-Genes,_collected_from_NCBI_Protein	Ricinus communis	NL	223533882	EQ974013	Ricinus communis genomic scaffold scf_1106159291084, whole genome shotgun sequence.
BGI_novel_G006927	PRGDB00216296	31.6	497	310	12	5	1444	306	789	7.5e-53	208.8	MDP0000292810	Putative_R-Genes,_predicted_from_Pythozome	Malus x domestica	NL
BGI_novel_G006938	PRGDB00182255	49	49	25	0	2000	2146	1621	1669	6.9e-07	56.2	441722	Putative_R-Genes,_predicted_from_Pythozome	Selaginella moellendorffii	N			pleiotropic drug resistance 12 (best arabidopsis hit)
BGI_novel_G006955	PRGDB00215267	39.1	87	50	2	455	709	728	813	2.7e-07	56.2	MDP0000256952	Putative_R-Genes,_predicted_from_Pythozome	Malus x domestica	RLP
BGI_novel_G006964	PRGDB00172620	76.3	59	14	0	502	678	27	85	1.6e-20	100.9	ppa002525m	Putative_R-Genes,_predicted_from_Pythozome	Prunus persica	RLP			Leucine-rich repeat protein kinase family protein (best arabidopsis hit)
BGI_novel_G006975	PRGDB00201456	73.6	53	14	0	178	336	354	406	1.3e-14	80.9	Bra016026	Putative_R-Genes,_predicted_from_Pythozome	Brassica rapa	CN
BGI_novel_G006983	PRGDB00202605	53.8	212	88	4	450	1058	9	219	1.5e-64	246.9	Carubv10019327m	Putative_R-Genes,_predicted_from_Pythozome	Capsella rubella	Other
BGI_novel_G007008	PRGDB00148403	24.9	265	184	4	677	1438	1394	1654	7.7e-13	75.5	clementine0.9_035959m	Putative_R-Genes,_predicted_from_Pythozome	Citrus clementina	CNL			NB-ARC domain-containing disease resistance protein (best arabidopsis hit)
BGI_novel_G007014	PRGDB00215944	62.4	85	28	2	903	1145	1693	1777	2.9e-23	109.8	MDP0000282838	Putative_R-Genes,_predicted_from_Pythozome	Malus x domestica	CN
BGI_novel_G007015	PRGDB00215944	62.4	85	28	2	701	943	1693	1777	2.5e-23	109.8	MDP0000282838	Putative_R-Genes,_predicted_from_Pythozome	Malus x domestica	CN
BGI_novel_G007095	PRGDB00144072	78.3	60	13	0	417	596	1147	1206	2.5e-24	113.2	915648	Putative_R-Genes,_predicted_from_Pythozome	Arabidopsis lyrata	NL			Disease resistance protein (TIR-NBS-LRR class) (best arabidopsis hit)
BGI_novel_G007155	PRGDB00187911	36.9	252	143	6	183	911	928	1172	1e-38	161.4	Ta.74193	Putative_R-Genes,_predicted_from_NCBI_UniGene	Triticum aestivum	RLP	241988090	AK335347	Triticum aestivum cDNA, clone: WT012_K21, cultivar: Chinese Spring
BGI_novel_G007163	PRGDB00061522	25.3	194	138	4	621	1181	22	215	1.4e-08	62.8	disease resistance protein	Putative_R-Genes,_collected_from_NCBI_Protein	Brassica rapa subsp. pekinensis	NL	227438216	FJ842817	Brassica rapa subsp. pekinensis isolate BrNL12 disease resistance protein gene, complete cds.
BGI_novel_G007190	PRGDB00148403	30.2	139	92	2	879	478	1484	1622	5.8e-07	56.2	clementine0.9_035959m	Putative_R-Genes,_predicted_from_Pythozome	Citrus clementina	CNL			NB-ARC domain-containing disease resistance protein (best arabidopsis hit)
BGI_novel_G007199	PRGDB00050753	58.5	212	87	1	129	761	428	639	5.5e-73	274.2	R 11	Putative_R-Genes,_collected_from_NCBI_Protein	Glycine max	TNL	27764534	AF541963	Glycine max cv Williams 82 BAC clone Gm_ISb001_091_F11, complete sequence.
BGI_novel_G007228	PRGDB00189344	56	109	45	2	1250	1567	1164	1272	7.9e-26	118.6	Hv.10056	Putative_R-Genes,_predicted_from_NCBI_UniGene	Hordeum vulgare	NL	326521753	AK369251	Hordeum vulgare subsp. vulgare mRNA for predicted protein, complete cds, clone: NIASHv2087M16
BGI_novel_G007365	PRGDB00164261	26.7	258	163	2	1289	2062	1670	1901	7.4e-18	92.8	Glyma16g23790.1	Putative_R-Genes,_predicted_from_Pythozome	Glycine max	CNL			transmembrane receptors;ATP binding (best arabidopsis hit)
BGI_novel_G007384	PRGDB00078883	35.9	198	120	3	1902	2483	242	436	1.4e-25	118.2	Vvi.16557	Putative_R-Genes,_predicted_from_NCBI_UniGene	Vitis vinifera	RLP	225441697	XM_002277255	PREDICTED: Vitis vinifera hypothetical protein LOC100262317 (LOC100262317), mRNA
BGI_novel_G007412	PRGDB00186217	33.8	154	88	4	3059	3490	1480	1629	6.4e-15	83.6	GRMZM2G381429_T01	Putative_R-Genes,_predicted_from_Pythozome	Zea mays	NL			NB-ARC domain-containing disease resistance protein (best arabidopsis hit); resistance protein, putative, expressed (best rice hit)
BGI_novel_G007413	PRGDB00148403	22	277	200	5	1058	261	1384	1655	1.4e-11	70.9	clementine0.9_035959m	Putative_R-Genes,_predicted_from_Pythozome	Citrus clementina	CNL			NB-ARC domain-containing disease resistance protein (best arabidopsis hit)
BGI_novel_G007435	PRGDB00213322	34.2	316	188	10	84	1010	794	1096	4.4e-46	185.3	MDP0000279719	Putative_R-Genes,_predicted_from_Pythozome	Malus x domestica	NL
BGI_novel_G007436	PRGDB00213322	34	297	169	9	208	1068	817	1096	8.4e-41	168.3	MDP0000279719	Putative_R-Genes,_predicted_from_Pythozome	Malus x domestica	NL
BGI_novel_G007437	PRGDB00213322	33.3	207	117	6	208	801	817	1011	7.4e-27	122.5	MDP0000279719	Putative_R-Genes,_predicted_from_Pythozome	Malus x domestica	NL
BGI_novel_G007487	PRGDB00148403	29.6	223	137	5	966	1598	1386	1600	1.1e-17	91.3	clementine0.9_035959m	Putative_R-Genes,_predicted_from_Pythozome	Citrus clementina	CNL			NB-ARC domain-containing disease resistance protein (best arabidopsis hit)
BGI_novel_G007492	PRGDB00213497	59.7	67	24	1	613	813	107	170	3.2e-12	72.8	MDP0000439417	Putative_R-Genes,_predicted_from_Pythozome	Malus x domestica	RLP
BGI_novel_G007497	PRGDB00187911	36.9	309	187	4	55	963	896	1202	8e-56	217.6	Ta.74193	Putative_R-Genes,_predicted_from_NCBI_UniGene	Triticum aestivum	RLP	241988090	AK335347	Triticum aestivum cDNA, clone: WT012_K21, cultivar: Chinese Spring
BGI_novel_G007519	PRGDB00149440	71.3	94	27	0	929	1210	850	943	1.3e-29	131	clementine0.9_001644m	Putative_R-Genes,_predicted_from_Pythozome	Citrus clementina	N			ABC2 homolog 6 (best arabidopsis hit)
BGI_novel_G007520	PRGDB00149440	71.3	94	27	0	881	1162	850	943	1.2e-29	131	clementine0.9_001644m	Putative_R-Genes,_predicted_from_Pythozome	Citrus clementina	N			ABC2 homolog 6 (best arabidopsis hit)
BGI_novel_G007547	PRGDB00187911	38.9	321	183	6	195	1124	876	1194	9.8e-65	247.7	Ta.74193	Putative_R-Genes,_predicted_from_NCBI_UniGene	Triticum aestivum	RLP	241988090	AK335347	Triticum aestivum cDNA, clone: WT012_K21, cultivar: Chinese Spring
BGI_novel_G007574	PRGDB00216189	57.4	188	79	1	128	688	33	220	3.7e-53	208	MDP0000215194	Putative_R-Genes,_predicted_from_Pythozome	Malus x domestica	RLP
BGI_novel_G007575	PRGWK00000549	43.7	71	40	0	1138	1350	825	895	4.8e-08	60.5	Solyc03g006030.1.1	Contributed_R-Genes	Solanum lycopersicum	RLK
BGI_novel_G007577	PRGWK00000549	48.6	35	18	0	1599	1703	454	488	23	30.8	Solyc03g006030.1.1	Contributed_R-Genes	Solanum lycopersicum	RLK
Ghir_A01G000170	PRGDB00181635	39.4	170	86	5	234	695	13	181	1.4e-25	117.1	Si025833m	Putative_R-Genes,_predicted_from_Pythozome	Setaria italica	NL			NAC domain containing protein 90 (best arabidopsis hit); NBS-LRR disease resistance protein, putative, expressed (best rice hit)
Ghir_A01G000380	PRGDB00204808	64.6	48	16	1	302	442	1759	1806	3e-06	53.1	GRMZM2G060054_T03	Putative_R-Genes,_predicted_from_Pythozome	Zea mays	CNL
Ghir_A01G000590	PRGDB00213428	32.4	105	60	3	744	1052	1042	1137	3.5e-10	67	MDP0000525273	Putative_R-Genes,_predicted_from_Pythozome	Malus x domestica	CNL
Ghir_A01G000740	PRGDB00214306	35	117	45	2	929	1279	90	175	9.4e-12	72	MDP0000240942	Putative_R-Genes,_predicted_from_Pythozome	Malus x domestica	CNL
Ghir_A01G000910	PRGDB00079109	71.8	248	64	3	234	974	755	997	1.7e-95	350.9	Vvi.25858	Putative_R-Genes,_predicted_from_NCBI_UniGene	Vitis vinifera	RLP	225428899	XM_002282493	PREDICTED: Vitis vinifera hypothetical protein LOC100260676 (LOC100260676), mRNA
Ghir_A01G000940	PRGDB00050753	50.7	205	94	3	165	779	438	635	5.5e-58	224.6	R 11	Putative_R-Genes,_collected_from_NCBI_Protein	Glycine max	TNL	27764534	AF541963	Glycine max cv Williams 82 BAC clone Gm_ISb001_091_F11, complete sequence.
Ghir_A01G001370	PRGDB00216544	49.4	261	99	2	2016	2798	232	459	1e-56	221.9	MDP0000286805	Putative_R-Genes,_predicted_from_Pythozome	Malus x domestica	TNL
Ghir_A01G001420	PRGDB00216326	69.3	323	91	2	522	1475	709	1028	1.4e-134	480.7	MDP0000255780	Putative_R-Genes,_predicted_from_Pythozome	Malus x domestica	RLP
Ghir_A01G001650	PRGDB00214154	58.7	482	192	2	218	1654	1296	1773	4.5e-169	594.3	MDP0000259421	Putative_R-Genes,_predicted_from_Pythozome	Malus x domestica	N
Ghir_A01G001770	PRGDB00070731	54.7	64	29	0	891	1082	19	82	2.2e-13	77.4	Mdo.689	Putative_R-Genes,_predicted_from_NCBI_UniGene	Malus x domestica	T	292668962	GU732467	Malus x domestica AP2 domain class transcription factor (AP2D43) mRNA, complete cds
Ghir_A01G001840	PRGDB00160871	49.7	519	236	9	1	1500	1	513	5.5e-134	477.6	cassava4.1_001427m	Putative_R-Genes,_predicted_from_Pythozome	Vitis aestivalis	CNL			Disease resistance protein (CC-NBS-LRR class) family (best arabidopsis hit)
Ghir_A01G001850	PRGDB00154034	33.5	920	510	17	7	2706	57	894	5.5e-126	451.8	orange1.1g036761m	Putative_R-Genes,_predicted_from_Pythozome	Citrus sinensis	CNL			Disease resistance protein (CC-NBS-LRR class) family (best arabidopsis hit)
Ghir_A01G001860	PRGDB00149628	45.5	898	454	14	1	2607	1	892	2.8e-207	721.8	clementine0.9_001935m	Putative_R-Genes,_predicted_from_Pythozome	Citrus clementina	CNL			Disease resistance protein (CC-NBS-LRR class) family (best arabidopsis hit)
Ghir_A01G001860.1	PRGDB00154053	46.7	889	444	13	136	2730	1	883	4.7e-213	741.1	orange1.1g002700m	Putative_R-Genes,_predicted_from_Pythozome	Citrus sinensis	CNL			Disease resistance protein (CC-NBS-LRR class) family (best arabidopsis hit)
Ghir_A01G001870	PRGDB00154053	47.4	889	443	12	354	2963	1	883	5.8e-217	754.2	orange1.1g002700m	Putative_R-Genes,_predicted_from_Pythozome	Citrus sinensis	CNL			Disease resistance protein (CC-NBS-LRR class) family (best arabidopsis hit)
Ghir_A01G001890	PRGDB00149628	44.7	899	424	17	1	2499	1	892	4.2e-194	677.9	clementine0.9_001935m	Putative_R-Genes,_predicted_from_Pythozome	Citrus clementina	CNL			Disease resistance protein (CC-NBS-LRR class) family (best arabidopsis hit)
Ghir_A01G001890.1	PRGDB00149628	52.1	532	243	9	354	1925	1	528	6.8e-144	510.8	clementine0.9_001935m	Putative_R-Genes,_predicted_from_Pythozome	Citrus clementina	CNL			Disease resistance protein (CC-NBS-LRR class) family (best arabidopsis hit)
Ghir_A01G001990	PRGDB00186748	64.3	42	14	1	493	618	1549	1589	3.5e-08	59.3		Putative_R-Genes,_collected_from_NCBI_Protein	Vitis vinifera	CNL	359494970	XM_002269736	PREDICTED: Vitis vinifera putative disease resistance protein At3g14460-like (LOC100262349), mRNA.
Ghir_A01G002130	PRGDB00218046	41.9	124	51	2	1095	1415	374	493	3.4e-14	80.9	Thhalv10027276m	Putative_R-Genes,_predicted_from_Pythozome	Eutrema halophilum	TNL
Ghir_A01G002320	PRGDB00182255	34.7	216	103	5	961	1599	1519	1699	1.6e-23	111.3	441722	Putative_R-Genes,_predicted_from_Pythozome	Selaginella moellendorffii	N			pleiotropic drug resistance 12 (best arabidopsis hit)
Ghir_A01G002460	PRGDB00189168	29.9	304	198	6	489	1376	79	375	3.4e-35	149.4	Gma.63188	Putative_R-Genes,_predicted_from_NCBI_UniGene	Glycine max	RLP	356523477	XM_003530317	PREDICTED: Glycine max protein STRUBBELIG-RECEPTOR FAMILY 5-like (LOC100785529), mRNA
Ghir_A01G002680	PRGDB00201821	49	49	25	0	618	764	1084	1132	8.1e-06	52.4	Bra012540	Putative_R-Genes,_predicted_from_Pythozome	Brassica rapa	TNL
Ghir_A01G002830	PRGDB00204802	54.4	57	23	1	199	360	750	806	7.3e-09	61.6	GRMZM2G392176_T01	Putative_R-Genes,_predicted_from_Pythozome	Zea mays	RLP
Ghir_A01G002840	PRGDB00183040	43.7	103	55	1	256	564	576	675	2.2e-17	89.4	GSVIVT01007793001	Putative_R-Genes,_predicted_from_Pythozome	Vitis vinifera	NL			RING/U-box superfamily protein (best arabidopsis hit)
Ghir_A01G003190	PRGDB00216779	89.3	56	6	0	2462	2629	1103	1158	1.1e-20	102.4	MDP0000600203	Putative_R-Genes,_predicted_from_Pythozome	Malus x domestica	RLP
Ghir_A01G003240	PRGDB00177091	42.3	123	68	3	220	582	240	361	6.6e-21	101.7	POPTR_0818s00195.1	Putative_R-Genes,_predicted_from_Pythozome	Populus trichocarpa	T			NAC domain containing protein 17 (best arabidopsis hit)
Ghir_A01G003480	PRGDB00078883	65.5	313	108	0	591	1529	661	973	1.2e-113	410.2	Vvi.16557	Putative_R-Genes,_predicted_from_NCBI_UniGene	Vitis vinifera	RLP	225441697	XM_002277255	PREDICTED: Vitis vinifera hypothetical protein LOC100262317 (LOC100262317), mRNA
Ghir_A01G003990.1	PRGDB00149962	50.9	234	106	7	1292	1972	384	615	1.7e-49	198.4	clementine0.9_033891m	Putative_R-Genes,_predicted_from_Pythozome	Citrus clementina	CNL			NB-ARC domain-containing disease resistance protein (best arabidopsis hit)
Ghir_A01G004210.1	PRGDB00183261	53.2	1005	389	21	114	2984	62	1033	8.4e-274	943	GSVIVT01014113001	Putative_R-Genes,_predicted_from_Pythozome	Vitis vinifera	RLP			Leucine-rich repeat transmembrane protein kinase (best arabidopsis hit)
Ghir_A01G004220	PRGDB00183261	70.5	982	282	5	413	3355	62	1036	0	1419.1	GSVIVT01014113001	Putative_R-Genes,_predicted_from_Pythozome	Vitis vinifera	RLP			Leucine-rich repeat transmembrane protein kinase (best arabidopsis hit)
Ghir_A01G004230.1	PRGDB00157599	66.4	999	328	6	359	3337	16	1012	0	1321.2	orange1.1g001767m	Putative_R-Genes,_predicted_from_Pythozome	Citrus sinensis	RLP			Leucine-rich repeat transmembrane protein kinase (best arabidopsis hit)
Ghir_A01G004250.1	PRGDB00214242	29.6	71	39	3	2920	3111	1015	1081	0.094	39.3	MDP0000898059	Putative_R-Genes,_predicted_from_Pythozome	Malus x domestica	RLP
Ghir_A01G004840	PRGDB00167562	46.4	192	103	0	1495	2070	444	635	1.1e-44	182.2	Medtr1g118320.1	Putative_R-Genes,_predicted_from_Pythozome	Medicago truncatula	CN			phosphoenolpyruvate carboxylase 4 (best arabidopsis hit)
Ghir_A01G004860	PRGDB00198577	29	124	76	3	1791	2135	17	137	0.0026	44.7	Pavirv00064701m	Putative_R-Genes,_predicted_from_Pythozome	Panicum virgatum	CN
Ghir_A01G005080	PRGDB00176673	53.5	1056	467	10	37	3177	12	1052	5e-301	1033.5	POPTR_0011s14420.1	Putative_R-Genes,_predicted_from_Pythozome	Populus trichocarpa	RLP			Leucine-rich repeat protein kinase family protein (best arabidopsis hit)
Ghir_A01G005130	PRGDB00214478	34	156	79	4	532	927	408	563	5.8e-16	84.7	MDP0000208730	Putative_R-Genes,_predicted_from_Pythozome	Malus x domestica	Mlo-like
Ghir_A01G005160	PRGDB00182366	40	80	44	2	2221	2460	1696	1771	2.3e-06	55.5	412710	Putative_R-Genes,_predicted_from_Pythozome	Selaginella moellendorffii	N			pleiotropic drug resistance 12 (best arabidopsis hit)
Ghir_A01G005160.1	PRGDB00182366	40	80	44	2	2590	2829	1696	1771	2.7e-06	55.5	412710	Putative_R-Genes,_predicted_from_Pythozome	Selaginella moellendorffii	N			pleiotropic drug resistance 12 (best arabidopsis hit)
Ghir_A01G005550	PRGDB00149481	46	1156	559	17	309	3752	14	1112	5.9e-265	914.1	clementine0.9_036043m	Putative_R-Genes,_predicted_from_Pythozome	Citrus clementina	TNL			disease resistance protein (TIR-NBS-LRR class), putative (best arabidopsis hit)
Ghir_A01G005770	PRGDB00164248	62.8	611	226	1	169	2001	23	632	1.4e-220	765.8	cassava4.1_032702m	Putative_R-Genes,_predicted_from_Pythozome	Vitis aestivalis	N			ABC-2 type transporter family protein (best arabidopsis hit)
Ghir_A01G005780	PRGDB00177091	42.1	152	86	2	144	596	240	390	2.3e-29	129.8	POPTR_0818s00195.1	Putative_R-Genes,_predicted_from_Pythozome	Populus trichocarpa	T			NAC domain containing protein 17 (best arabidopsis hit)
Ghir_A01G006250	PRGDB00149962	42.4	983	524	18	70	2958	6	966	6.2e-195	681	clementine0.9_033891m	Putative_R-Genes,_predicted_from_Pythozome	Citrus clementina	CNL			NB-ARC domain-containing disease resistance protein (best arabidopsis hit)
Ghir_A01G006320	PRGDB00080257	49.4	851	424	6	157	2694	7	855	7.8e-237	820.1	Les.24017	Putative_R-Genes,_predicted_from_NCBI_UniGene	Solanum lycopersicum	CNL	225312705	AK320048	Solanum lycopersicum cDNA, clone: LEFL1004BH01, HTC in leaf
Ghir_A01G006790	PRGDB00061522	51.7	29	14	0	226	312	331	359	0.32	37.7	disease resistance protein	Putative_R-Genes,_collected_from_NCBI_Protein	Brassica rapa subsp. pekinensis	NL	227438216	FJ842817	Brassica rapa subsp. pekinensis isolate BrNL12 disease resistance protein gene, complete cds.
Ghir_A01G006940	PRGDB00047385	58.3	96	40	0	790	1077	388	483	2.3e-27	122.9	NBS type disease resistance protein	Putative_R-Genes,_collected_from_NCBI_Protein	Populus trichocarpa	N	105922962	DQ513233	Populus trichocarpa clone 177919 NBS type disease resistance protein mRNA, complete cds.
Ghir_A01G007180	PRGDB00061511	52.9	412	178	1	6	1193	1758	2169	2.8e-124	446	disease resistance protein	Putative_R-Genes,_collected_from_NCBI_Protein	Brassica rapa subsp. pekinensis	TNL	227438238	FJ842828	Brassica rapa subsp. pekinensis isolate BrTNL10 disease resistance protein gene, complete cds.
Ghir_A01G007230.2	PRGDB00202501	62.6	230	85	1	321	1007	87	316	5.2e-76	285.8	Bra036019	Putative_R-Genes,_predicted_from_Pythozome	Brassica rapa	TNL
Ghir_A01G007280	PRGDB00215267	87.2	47	6	0	688	828	35	81	4.6e-16	85.5	MDP0000256952	Putative_R-Genes,_predicted_from_Pythozome	Malus x domestica	RLP
Ghir_A01G007440	PRGDB00070731	59.1	66	27	0	885	1082	23	88	2.3e-15	84.3	Mdo.689	Putative_R-Genes,_predicted_from_NCBI_UniGene	Malus x domestica	T	292668962	GU732467	Malus x domestica AP2 domain class transcription factor (AP2D43) mRNA, complete cds
Ghir_A01G008160	PRGDB00206841	54	63	27	1	1609	1427	372	434	3.7e-13	76.3	LOC_Os04g53040.1	Putative_R-Genes,_predicted_from_Pythozome	Oryza sativa	NL
Ghir_A01G008250	PRGDB00215446	66.2	210	62	2	1893	2501	352	559	1.4e-73	277.7	MDP0000264975	Putative_R-Genes,_predicted_from_Pythozome	Malus x domestica	TNL
Ghir_A01G008260	PRGDB00215326	61.3	357	108	3	202	1269	1478	1805	1e-119	430.3	MDP0000285649	Putative_R-Genes,_predicted_from_Pythozome	Malus x domestica	NL
Ghir_A01G008300	PRGDB00213180	47.5	59	29	1	2021	2191	859	917	4.6e-07	57	MDP0000285880	Putative_R-Genes,_predicted_from_Pythozome	Malus x domestica	TNL
Ghir_A01G008310	PRGDB00062347	35.2	88	49	2	1528	1791	178	257	9.2e-10	65.5	E3 ligase	Putative_R-Genes,_collected_from_NCBI_Protein	Oryza sativa Japonica Group	N	324029072	HQ123582	Oryza sativa Japonica Group cultivar Taipei 309 E3 ligase (BBI1) gene, complete cds.
Ghir_A01G008340	PRGDB00175219	52.8	193	71	1	431	1009	3	175	3.6e-51	202.2	POPTR_0003s08250.1	Putative_R-Genes,_predicted_from_Pythozome	Populus trichocarpa	TNL			transmembrane receptors;ATP binding (best arabidopsis hit)
Ghir_A01G008390	PRGDB00173031	75.7	1092	257	4	246	3506	1	1089	0	1628.2	ppa000573m	Putative_R-Genes,_predicted_from_Pythozome	Prunus persica	RLP			Leucine-rich receptor-like protein kinase family protein (best arabidopsis hit)
Ghir_A01G008410	PRGDB00216779	46.6	58	31	0	2323	2496	1103	1160	1.3e-06	55.8	MDP0000600203	Putative_R-Genes,_predicted_from_Pythozome	Malus x domestica	RLP
Ghir_A01G008450.1	PRGDB00181372	28.6	133	89	3	584	982	149	275	5.8e-06	53.1	Si005894m	Putative_R-Genes,_predicted_from_Pythozome	Setaria italica	CN			U-box domain-containing protein kinase family protein (best arabidopsis hit); protein kinase, putative, expressed (best rice hit)
Ghir_A01G008570.2	PRGDB00181316	27	100	70	1	355	654	121	217	1.3e-06	55.1	Si005916m	Putative_R-Genes,_predicted_from_Pythozome	Setaria italica	CN			U-box domain-containing protein kinase family protein (best arabidopsis hit); protein kinase, putative, expressed (best rice hit)
Ghir_A01G009160	PRGDB00213363	72.7	77	21	0	16	246	1332	1408	4.2e-27	122.5	MDP0000265619	Putative_R-Genes,_predicted_from_Pythozome	Malus x domestica	N
Ghir_A01G009370	PRGDB00216544	72.2	227	63	0	1787	2467	231	457	4.3e-88	325.9	MDP0000286805	Putative_R-Genes,_predicted_from_Pythozome	Malus x domestica	TNL
Ghir_A01G009380	PRGDB00183040	42.9	84	42	2	282	530	577	655	4.9e-13	75.5	GSVIVT01007793001	Putative_R-Genes,_predicted_from_Pythozome	Vitis vinifera	NL			RING/U-box superfamily protein (best arabidopsis hit)
Ghir_A01G009450	PRGDB00213421	71.2	379	106	1	888	2015	1	379	2.3e-158	559.3	MDP0000280399	Putative_R-Genes,_predicted_from_Pythozome	Malus x domestica	RLP
Ghir_A01G009480	PRGDB00202436	34.7	95	56	2	564	848	1487	1575	2.8e-09	64.3	Bra010551	Putative_R-Genes,_predicted_from_Pythozome	Brassica rapa	CNL
Ghir_A01G010270.1	PRGDB00202436	45.1	102	53	1	374	679	1254	1352	2.3e-17	91.3	Bra010551	Putative_R-Genes,_predicted_from_Pythozome	Brassica rapa	CNL
Ghir_A01G010560	PRGDB00161165	64	833	221	7	1	2277	1	828	9.4e-302	1035.4	cassava4.1_001747m	Putative_R-Genes,_predicted_from_Pythozome	Vitis aestivalis	RPW8-NL			ADR1-like 1 (best arabidopsis hit)
Ghir_A01G010560.1	PRGDB00161165	66.8	570	183	4	1268	2977	258	821	6.8e-221	767.3	cassava4.1_001747m	Putative_R-Genes,_predicted_from_Pythozome	Vitis aestivalis	RPW8-NL			ADR1-like 1 (best arabidopsis hit)
Ghir_A01G010850	PRGDB00177275	64.3	994	342	5	119	3094	28	1010	0	1211.8	29991.m000656	Putative_R-Genes,_predicted_from_Pythozome	Oryza barthii	RLP			Leucine-rich repeat protein kinase family protein (best arabidopsis hit)
Ghir_A01G010890	PRGDB00073072	41.5	53	27	3	893	1045	562	612	79	29.3	Os.80143	Putative_R-Genes,_predicted_from_NCBI_UniGene	Oryza sativa Japonica Group	CNL	32975074	AK065056	Oryza sativa Japonica Group cDNA clone:J013001J06, full insert sequence
Ghir_A01G010940	PRGDB00149156	70	630	155	9	106	1899	38	665	4.4e-244	843.6	clementine0.9_004363m	Putative_R-Genes,_predicted_from_Pythozome	Citrus clementina	RLP			Leucine-rich repeat protein kinase family protein (best arabidopsis hit)
Ghir_A01G011020	PRGDB00215570	67.3	52	16	1	1307	1459	1020	1071	2.2e-12	73.9	MDP0000168665	Putative_R-Genes,_predicted_from_Pythozome	Malus x domestica	TNL
Ghir_A01G011050	PRGDB00152962	43.1	195	97	5	404	946	1	195	9.5e-32	138.7	orange1.1g002265m	Putative_R-Genes,_predicted_from_Pythozome	Citrus sinensis	CNL			NB-ARC domain-containing disease resistance protein (best arabidopsis hit)
Ghir_A01G011250	PRGDB00192408	24.2	223	142	6	1149	1802	1563	1763	3.8e-07	56.6	Mtr.17858	Putative_R-Genes,_predicted_from_NCBI_UniGene	Medicago truncatula	NL	357472002	XM_003606238	Medicago truncatula NBS resistance protein (MTR_4g055630) mRNA, complete cds
Ghir_A01G011600	PRGDB00188448	50.8	246	110	4	1370	2101	61	297	8e-61	235.7	Gma.19334	Putative_R-Genes,_predicted_from_NCBI_UniGene	Glycine max	NL	356567183	XM_003551753	PREDICTED: Glycine max probable disease resistance protein At4g27220-like (LOC100788065), mRNA
Ghir_A01G011810.1	PRGDB00184089	40	80	48	0	1956	2195	676	755	2.4e-09	65.1	GSVIVT01029816001	Putative_R-Genes,_predicted_from_Pythozome	Vitis vinifera	RLP			BRI1-associated receptor kinase (best arabidopsis hit)
Ghir_A01G011860	PRGDB00203241	69.7	1896	536	11	276	5912	7	1881	0	2623.6	Carubv10025445m	Putative_R-Genes,_predicted_from_Pythozome	Capsella rubella	N
Ghir_A01G011860.1	PRGDB00203241	76.4	711	162	5	82	2196	1171	1881	0	1090.9	Carubv10025445m	Putative_R-Genes,_predicted_from_Pythozome	Capsella rubella	N
Ghir_A01G011910.2	PRGDB00078883	32.5	83	56	0	2021	1773	175	257	2.3e-05	52	Vvi.16557	Putative_R-Genes,_predicted_from_NCBI_UniGene	Vitis vinifera	RLP	225441697	XM_002277255	PREDICTED: Vitis vinifera hypothetical protein LOC100262317 (LOC100262317), mRNA
Ghir_A01G011970	PRGDB00206562	46.3	348	183	4	1522	2556	484	830	9.8e-77	288.5	Lus10028841	Putative_R-Genes,_predicted_from_Pythozome	Linum usitatissimum	N
Ghir_A01G012100	PRGDB00207410	46.3	147	77	1	1489	1923	349	495	4.3e-30	133.3	Aquca_009_00902.1	Putative_R-Genes,_predicted_from_Pythozome	Aquilegia coerulea	RLP
Ghir_A01G012290	PRGDB00215267	44.9	227	120	4	561	1232	325	549	9.8e-49	194.9	MDP0000256952	Putative_R-Genes,_predicted_from_Pythozome	Malus x domestica	RLP
Ghir_A01G012290.1	PRGDB00215267	49.3	75	37	1	561	782	325	399	2.7e-14	81.3	MDP0000256952	Putative_R-Genes,_predicted_from_Pythozome	Malus x domestica	RLP
Ghir_A01G012490.1	PRGDB00178750	78	744	161	2	164	2392	1	742	0	1142.5	POPTR_0016s06620.1	Putative_R-Genes,_predicted_from_Pythozome	Populus trichocarpa	N			ABC-2 type transporter family protein (best arabidopsis hit)
Ghir_A01G012750	PRGDB00202169	44.4	63	35	0	2186	1998	76	138	5.9e-11	69.7	Bra007015	Putative_R-Genes,_predicted_from_Pythozome	Brassica rapa	RLP
Ghir_A01G013940.1	PRGDB00190291	27.5	142	87	5	2415	2837	356	482	1	36.2	Lsa.16797	Putative_R-Genes,_predicted_from_NCBI_UniGene	Lactuca sativa	N	329676902	JI579408	TSA: Lactuca sativa Letassy_X1_5504 mRNA sequence
Ghir_A01G014200	PRGDB00074692	32.1	252	145	8	252	947	1	246	5.3e-25	115.5	Psi.20381	Putative_R-Genes,_predicted_from_NCBI_UniGene	Picea sitchensis	RLK-GNK2	148906756	EF676637	Picea sitchensis clone WS02745_K01 unknown mRNA
Ghir_A01G014250	PRGDB00217904	37.5	80	49	1	2538	2302	167	246	3.8e-06	53.9	Thhalv10018718m	Putative_R-Genes,_predicted_from_Pythozome	Eutrema halophilum	TNL
Ghir_A01G014260	PRGDB00217904	37.5	80	49	1	613	849	167	246	2.6e-06	53.9	Thhalv10018718m	Putative_R-Genes,_predicted_from_Pythozome	Eutrema halophilum	TNL
Ghir_A01G014680	PRGDB00211657	66.7	45	15	0	360	494	670	714	2.4e-11	69.7	Eucgr.H02157.1	Putative_R-Genes,_predicted_from_Pythozome	Eucalyptus grandis	TNL
Ghir_A01G014710.1	PRGDB00183155	75.4	731	146	5	206	2302	2	730	2.7e-305	1047.7	GSVIVT01011781001	Putative_R-Genes,_predicted_from_Pythozome	Vitis vinifera	N			ABC-2 type transporter family protein (best arabidopsis hit)
Ghir_A01G015270	PRGDB00078803	39.1	396	232	5	1832	3010	211	600	1.8e-60	234.6	Vvi.12916	Putative_R-Genes,_predicted_from_NCBI_UniGene	Vitis vinifera	N	225452756	XM_002283015	PREDICTED: Vitis vinifera hypothetical protein LOC100262734 (LOC100262734), mRNA
Ghir_A01G015270.1	PRGDB00078803	50.9	228	105	3	3421	4098	378	600	3.7e-50	200.7	Vvi.12916	Putative_R-Genes,_predicted_from_NCBI_UniGene	Vitis vinifera	N	225452756	XM_002283015	PREDICTED: Vitis vinifera hypothetical protein LOC100262734 (LOC100262734), mRNA
Ghir_A01G015450	PRGDB00178714	54.4	305	130	4	294	1187	854	1156	5.1e-93	341.3	Sb02g022180.1	Putative_R-Genes,_predicted_from_Pythozome	Sorghum bicolor	NL			Domain of unknown function (DUF220) (best arabidopsis hit); OBP32pep, putative, expressed (best rice hit)
Ghir_A01G015890	PRGDB00202605	50	224	108	4	355	1017	25	247	9.6e-63	240.7	Carubv10019327m	Putative_R-Genes,_predicted_from_Pythozome	Capsella rubella	Other
Ghir_A01G015910	PRGDB00192082	52.4	233	100	4	434	1108	31	260	3.7e-70	265.8	Lsa.52826	Putative_R-Genes,_predicted_from_NCBI_UniGene	Lactuca sativa	Other	329672052	JI574558	TSA: Lactuca sativa Letassy_X1_3613 mRNA sequence
Ghir_A01G015980	PRGDB00214989	42.7	454	202	11	862	2085	168	609	3.6e-82	305.8	MDP0000481805	Putative_R-Genes,_predicted_from_Pythozome	Malus x domestica	N
Ghir_A01G016000	PRGDB00193121	33.3	72	48	0	782	997	928	999	4.9e-06	52.4	Ta.71864	Putative_R-Genes,_predicted_from_NCBI_UniGene	Triticum aestivum	CNL	312469343	HP616612	TSA: Triticum aestivum cultivar Bobwhite isotig07427.flagleaf mRNA sequence
Ghir_A01G016010	PRGDB00211657	64.4	45	16	0	1012	1146	670	714	4.9e-12	72.8	Eucgr.H02157.1	Putative_R-Genes,_predicted_from_Pythozome	Eucalyptus grandis	TNL
Ghir_A01G016260	PRGDB00189838	60.1	326	121	3	883	1857	1251	1568	3.2e-108	392.5	Hv.34616	Putative_R-Genes,_predicted_from_NCBI_UniGene	Hordeum vulgare	NL	326530114	AK377143	Hordeum vulgare subsp. vulgare mRNA for predicted protein, partial cds, clone: NIASHv3149K09
Ghir_A01G016500	PRGDB00192408	24.8	202	131	6	1129	1710	1575	1763	4.6e-07	56.2	Mtr.17858	Putative_R-Genes,_predicted_from_NCBI_UniGene	Medicago truncatula	NL	357472002	XM_003606238	Medicago truncatula NBS resistance protein (MTR_4g055630) mRNA, complete cds
Ghir_A01G016710	PRGDB00192459	45.9	266	137	2	680	1459	212	476	7.3e-60	231.5	Mtr.22577	Putative_R-Genes,_predicted_from_NCBI_UniGene	Medicago truncatula	CNL	357509266	XM_003624874	Medicago truncatula NB-LRR type disease resistance protein (MTR_7g089080) mRNA, complete cds
Ghir_A01G016720	PRGDB00191296	44.8	277	152	1	1592	2419	247	523	1.4e-59	231.1	Lsa.44031	Putative_R-Genes,_predicted_from_NCBI_UniGene	Lactuca sativa	N	329679120	JI581626	TSA: Lactuca sativa CLC_LTR_V1A_17001 mRNA sequence
Ghir_A01G016780	PRGDB00213363	70.6	85	25	0	2837	3091	1327	1411	6.2e-28	126.7	MDP0000265619	Putative_R-Genes,_predicted_from_Pythozome	Malus x domestica	N
Ghir_A01G016780.1	PRGDB00213363	70.6	51	15	0	3440	3592	1361	1411	6e-14	80.5	MDP0000265619	Putative_R-Genes,_predicted_from_Pythozome	Malus x domestica	N
Ghir_A01G017230	PRGDB00176101	66.4	943	285	3	684	3425	30	969	0	1265.4	POPTR_0009s08540.1	Putative_R-Genes,_predicted_from_Pythozome	Populus trichocarpa	RLP			Leucine-rich receptor-like protein kinase family protein (best arabidopsis hit)
Ghir_A01G017410	PRGDB00215055	50	76	38	0	1080	1307	758	833	2.5e-16	87.8	MDP0000248164	Putative_R-Genes,_predicted_from_Pythozome	Malus x domestica	NL
Ghir_A01G017430	PRGDB00147571	42.9	105	50	1	828	1142	731	825	3.6e-18	93.6	clementine0.9_000952m	Putative_R-Genes,_predicted_from_Pythozome	Citrus clementina	RLP			Leucine-rich repeat protein kinase family protein (best arabidopsis hit)
Ghir_A01G017700	PRGDB00153683	77.8	963	211	2	639	3521	3	964	0	1493.8	orange1.1g001922m	Putative_R-Genes,_predicted_from_Pythozome	Citrus sinensis	RLP			Leucine-rich receptor-like protein kinase family protein (best arabidopsis hit)
Ghir_A01G018380	PRGWK00001141	69.7	76	23	0	576	803	917	992	9.5e-29	127.9	Solyc12g100010.1.1	Contributed_R-Genes	Solanum lycopersicum	RLP
Ghir_A01G018380.1	PRGWK00001141	69.7	76	23	0	1207	1434	917	992	1.4e-28	127.9	Solyc12g100010.1.1	Contributed_R-Genes	Solanum lycopersicum	RLP
Ghir_A01G018400	PRGDB00216650	64	225	77	2	1452	2126	1025	1245	2.5e-82	306.6	MDP0000252094	Putative_R-Genes,_predicted_from_Pythozome	Malus x domestica	RLP
Ghir_A01G018640.1	PRGDB00216779	43.9	57	32	0	481	651	1103	1159	1.4e-06	54.3	MDP0000600203	Putative_R-Genes,_predicted_from_Pythozome	Malus x domestica	RLP
Ghir_A01G018920	PRGDB00150642	64.3	624	217	3	311	2170	22	643	2.4e-221	768.5	evm.model.supercontig_85.116	Putative_R-Genes,_predicted_from_Pythozome	Arabidopsis lyrata subsp. lyrata	RLP			Leucine-rich repeat protein kinase family protein (best arabidopsis hit)
Ghir_A01G019270	PRGDB00214610	49.5	99	50	0	646	942	1553	1651	8.3e-21	101.3	MDP0000288298	Putative_R-Genes,_predicted_from_Pythozome	Malus x domestica	TNL
Ghir_A01G019310	PRGDB00178750	81.8	614	85	3	815	2575	129	742	1.8e-285	981.5	POPTR_0016s06620.1	Putative_R-Genes,_predicted_from_Pythozome	Populus trichocarpa	N			ABC-2 type transporter family protein (best arabidopsis hit)
Ghir_A01G019310.1	PRGDB00178750	80.4	739	143	2	281	2494	5	742	0	1166	POPTR_0016s06620.1	Putative_R-Genes,_predicted_from_Pythozome	Populus trichocarpa	N			ABC-2 type transporter family protein (best arabidopsis hit)
Ghir_A01G019410	PRGDB00150715	60.9	755	285	4	175	2427	1	749	5.6e-264	910.2	evm.TU.contig_30789.1	Putative_R-Genes,_predicted_from_Pythozome	Arabidopsis lyrata subsp. lyrata	RLP			Leucine-rich repeat protein kinase family protein (best arabidopsis hit)
Ghir_A01G019460	PRGDB00079067	36.8	397	227	11	7	1143	936	1326	1.4e-57	223.4	Vvi.24747	Putative_R-Genes,_predicted_from_NCBI_UniGene	Vitis vinifera	NL	225424433	XM_002281516	PREDICTED: Vitis vinifera hypothetical protein LOC100249092 (LOC100249092), mRNA
Ghir_A01G019500	PRGDB00176116	69.6	932	270	8	328	3102	36	961	0	1253.4	29439.m000228	Putative_R-Genes,_predicted_from_Pythozome	Oryza barthii	RLP			Leucine-rich repeat protein kinase family protein (best arabidopsis hit)
Ghir_A01G019500.1	PRGDB00176116	69.6	932	270	8	315	3089	36	961	0	1253.4	29439.m000228	Putative_R-Genes,_predicted_from_Pythozome	Oryza barthii	RLP			Leucine-rich repeat protein kinase family protein (best arabidopsis hit)
Ghir_A01G019730	PRGDB00183352	36.8	475	268	4	416	1828	1447	1893	1.6e-80	300.4	GSVIVT01015461001	Putative_R-Genes,_predicted_from_Pythozome	Vitis vinifera	N			pleiotropic drug resistance 12 (best arabidopsis hit)
Ghir_A01G019790	PRGDB00181635	55.4	177	73	3	66	593	11	182	2.7e-44	179.1	Si025833m	Putative_R-Genes,_predicted_from_Pythozome	Setaria italica	NL			NAC domain containing protein 90 (best arabidopsis hit); NBS-LRR disease resistance protein, putative, expressed (best rice hit)
Ghir_A01G020230	PRGDB00207410	41.4	152	87	1	1540	1989	343	494	3.9e-26	120.2	Aquca_009_00902.1	Putative_R-Genes,_predicted_from_Pythozome	Aquilegia coerulea	RLP
Ghir_A01G020240	PRGDB00174904	73.6	647	161	4	242	2161	36	679	6.1e-275	946.4	POPTR_0006s11840.1	Putative_R-Genes,_predicted_from_Pythozome	Populus trichocarpa	RLP			Leucine-rich repeat protein kinase family protein (best arabidopsis hit)
Ghir_A01G020460	PRGDB00215167	41.1	95	51	1	2547	2816	86	180	3.6e-10	67.4	MDP0000184177	Putative_R-Genes,_predicted_from_Pythozome	Malus x domestica	TNL
Ghir_A01G021190	PRGDB00202169	68.6	236	39	1	267	869	15	250	1.1e-79	297	Bra007015	Putative_R-Genes,_predicted_from_Pythozome	Brassica rapa	RLP
Ghir_A01G021530	PRGDB00182255	35.7	185	87	2	1200	1754	1517	1669	7e-25	116.3	441722	Putative_R-Genes,_predicted_from_Pythozome	Selaginella moellendorffii	N			pleiotropic drug resistance 12 (best arabidopsis hit)
Ghir_A01G021670	PRGDB00167710	82.2	393	68	1	10	1188	878	1268	6e-180	630.6	Medtr2g047020.1	Putative_R-Genes,_predicted_from_Pythozome	Medicago truncatula	TNL			heat shock cognate protein 70-1 (best arabidopsis hit)
Ghir_A01G021680	PRGDB00167710	82.2	393	68	1	179	1357	878	1268	7.8e-180	630.6	Medtr2g047020.1	Putative_R-Genes,_predicted_from_Pythozome	Medicago truncatula	TNL			heat shock cognate protein 70-1 (best arabidopsis hit)
Ghir_A01G022390	PRGDB00184231	50.9	171	84	0	82	594	125	295	3e-43	174.9	GSVIVT01032740001	Putative_R-Genes,_predicted_from_Pythozome	Vitis vinifera	RLP			inflorescence meristem receptor-like kinase 2 (best arabidopsis hit)
Ghir_A01G022430	PRGWK00001242	26.2	206	120	3	805	1404	67	246	1.8e-10	67.8	Sotub01g037760.1.1	Contributed_R-Genes	Solanum tuberosum	RLP
Ghir_A01G022550.1	PRGDB00214355	35.6	160	96	3	829	1308	753	905	3.8e-18	92.8	MDP0000310183	Putative_R-Genes,_predicted_from_Pythozome	Malus x domestica	CNL
Ghir_A01G022740	PRGDB00182255	39	182	80	3	5875	6420	1519	1669	5.1e-25	117.9	441722	Putative_R-Genes,_predicted_from_Pythozome	Selaginella moellendorffii	N			pleiotropic drug resistance 12 (best arabidopsis hit)
Ghir_A01G022880	PRGDB00202169	54.4	125	57	0	249	623	15	139	4.1e-33	142.1	Bra007015	Putative_R-Genes,_predicted_from_Pythozome	Brassica rapa	RLP
Ghir_A01G023010	PRGDB00216446	64.8	108	35	1	2049	2372	1161	1265	1.4e-33	144.8	MDP0000196862	Putative_R-Genes,_predicted_from_Pythozome	Malus x domestica	RLP
Ghir_A02G000170	PRGDB00213184	80.5	133	26	0	655	1053	1	133	2e-55	216.9	MDP0000285888	Putative_R-Genes,_predicted_from_Pythozome	Malus x domestica	CNL
Ghir_A02G000420	PRGDB00215055	45.9	74	39	1	251	469	758	831	9.5e-13	73.9	MDP0000248164	Putative_R-Genes,_predicted_from_Pythozome	Malus x domestica	NL
Ghir_A02G000500	PRGDB00201108	27.3	348	224	10	1218	2234	982	1309	3.2e-24	113.6	Bra002153	Putative_R-Genes,_predicted_from_Pythozome	Brassica rapa	TNL
Ghir_A02G000650	PRGDB00216535	37.8	90	45	2	1060	1302	395	482	3e-07	57.4	MDP0000279752	Putative_R-Genes,_predicted_from_Pythozome	Malus x domestica	N
Ghir_A02G000670.1	PRGDB00078525	73	137	37	0	292	702	144	280	7.1e-56	218.8	Vvi.774	Putative_R-Genes,_predicted_from_NCBI_UniGene	Vitis vinifera	RLP	225469427	XM_002267128	PREDICTED: Vitis vinifera hypothetical protein LOC100251471 (LOC100251471), mRNA
Ghir_A02G000680	PRGDB00078525	51.9	345	113	6	13	996	9	317	4.3e-89	327.8	Vvi.774	Putative_R-Genes,_predicted_from_NCBI_UniGene	Vitis vinifera	RLP	225469427	XM_002267128	PREDICTED: Vitis vinifera hypothetical protein LOC100251471 (LOC100251471), mRNA
Ghir_A02G000710	PRGDB00078525	56.7	342	111	7	24	1043	11	317	1.9e-102	372.5	Vvi.774	Putative_R-Genes,_predicted_from_NCBI_UniGene	Vitis vinifera	RLP	225469427	XM_002267128	PREDICTED: Vitis vinifera hypothetical protein LOC100251471 (LOC100251471), mRNA
Ghir_A02G000770	PRGDB00201109	46.7	362	181	7	136	1194	7	365	1.2e-85	316.6	Bra015449	Putative_R-Genes,_predicted_from_Pythozome	Brassica rapa	RLP
Ghir_A02G000770.1	PRGDB00201109	46.7	362	181	7	136	1194	7	365	1.3e-85	316.6	Bra015449	Putative_R-Genes,_predicted_from_Pythozome	Brassica rapa	RLP
Ghir_A02G000810	PRGDB00205338	44	468	233	11	1737	3089	952	1407	3e-92	340.1	Lus10015091	Putative_R-Genes,_predicted_from_Pythozome	Linum usitatissimum	RLK-GNK2
Ghir_A02G000950.1	PRGDB00202070	28.2	206	128	6	205	783	54	252	1e-10	68.6	Bra027581	Putative_R-Genes,_predicted_from_Pythozome	Brassica rapa	RLK-GNK2
Ghir_A02G001160	PRGDB00155485	42.9	769	414	15	895	3162	14	770	2.3e-151	536.6	orange1.1g003435m	Putative_R-Genes,_predicted_from_Pythozome	Citrus sinensis	NL			NB-ARC domain-containing disease resistance protein (best arabidopsis hit)
Ghir_A02G001170	PRGDB00149372	52.2	901	411	6	1426	4089	428	1321	7.2e-264	910.6	clementine0.9_000539m	Putative_R-Genes,_predicted_from_Pythozome	Citrus clementina	NL			NB-ARC domain-containing disease resistance protein (best arabidopsis hit)
Ghir_A02G001760	PRGDB00182255	27.3	187	101	5	1414	1974	1517	1668	7.2e-06	53.5	441722	Putative_R-Genes,_predicted_from_Pythozome	Selaginella moellendorffii	N			pleiotropic drug resistance 12 (best arabidopsis hit)
Ghir_A02G001780	PRGDB00065333	85.7	28	4	0	373	456	140	167	6.3e-07	55.1	Aan.68903	Putative_R-Genes,_predicted_from_NCBI_UniGene	Artemisia annua	RLK	259809559	EZ369767	TSA: Artemisia annua strain Uganda Contig3218.Ulm mRNA sequence
Ghir_A02G001870	PRGDB00202169	50	128	64	0	309	692	13	140	9.4e-35	147.5	Bra007015	Putative_R-Genes,_predicted_from_Pythozome	Brassica rapa	RLP
Ghir_A02G002070	PRGDB00149385	78.7	437	78	5	1577	2851	495	928	1.5e-196	686.4	evm.model.supercontig_157.31	Putative_R-Genes,_predicted_from_Pythozome	Arabidopsis lyrata subsp. lyrata	RLP			Leucine-rich repeat protein kinase family protein (best arabidopsis hit)
Ghir_A02G002710	PRGDB00072527	36.5	359	188	9	884	1894	709	1049	3.8e-51	203	Os.49895	Putative_R-Genes,_predicted_from_NCBI_UniGene	Oryza sativa Japonica Group	NL	37988925	AK119302	Oryza sativa Japonica Group cDNA clone:001-130-F02, full insert sequence
Ghir_A02G002710.1	PRGDB00072527	53	115	46	1	3074	3418	943	1049	9.9e-25	115.9	Os.49895	Putative_R-Genes,_predicted_from_NCBI_UniGene	Oryza sativa Japonica Group	NL	37988925	AK119302	Oryza sativa Japonica Group cDNA clone:001-130-F02, full insert sequence
Ghir_A02G002720	PRGDB00062544	64.8	54	19	0	1240	1401	991	1044	5.3e-13	75.9	cc-nbs-lrr resistance protein	Putative_R-Genes,_collected_from_NCBI_Protein	Populus trichocarpa	NL	116047840	CM000338	Populus trichocarpa linkage group II, whole genome shotgun sequence.
Ghir_A02G002790	PRGDB00200918	23.4	214	120	12	1339	1911	624	816	1.9e-05	50.8	Bra023648	Putative_R-Genes,_predicted_from_Pythozome	Brassica rapa	TNL
Ghir_A02G002810.1	PRGDB00200918	34.2	357	203	12	2523	3554	520	857	7.3e-52	206.1	Bra023648	Putative_R-Genes,_predicted_from_Pythozome	Brassica rapa	TNL
Ghir_A02G002830	PRGDB00200918	34.1	337	183	9	982	1944	518	831	3.1e-54	213	Bra023648	Putative_R-Genes,_predicted_from_Pythozome	Brassica rapa	TNL
Ghir_A02G003000	PRGWK00000938	71.9	32	9	0	393	488	557	588	1.2e-06	53.9	Solyc09g064680.1.1	Contributed_R-Genes	Solanum lycopersicum	NL
Ghir_A02G003010	PRGWK00000938	71.9	32	9	0	448	543	557	588	5.1e-06	51.6	Solyc09g064680.1.1	Contributed_R-Genes	Solanum lycopersicum	NL
Ghir_A02G003080	PRGDB00176268	81.6	125	19	1	2582	2220	333	457	2.1e-52	208	29656.m000483	Putative_R-Genes,_predicted_from_Pythozome	Oryza barthii	Mlo-like			Seven transmembrane MLO family protein (best arabidopsis hit)
Ghir_A02G003100	PRGDB00216446	39.4	165	85	3	2226	2702	1111	1266	4.2e-29	130.2	MDP0000196862	Putative_R-Genes,_predicted_from_Pythozome	Malus x domestica	RLP
Ghir_A02G003100.1	PRGDB00216446	44.7	47	26	0	910	1050	915	961	5.4e-08	60.1	MDP0000196862	Putative_R-Genes,_predicted_from_Pythozome	Malus x domestica	RLP
Ghir_A02G003190	PRGDB00192813	86.9	145	19	0	383	817	832	976	3.1e-71	268.5	Smo.15449	Putative_R-Genes,_predicted_from_NCBI_UniGene	Selaginella moellendorffii	N	302822632	XM_002992927	Selaginella moellendorffii hypothetical protein, mRNA
Ghir_A02G003620	PRGDB00217736	39.1	161	82	1	117	551	264	424	8.8e-26	117.1	Thhalv10027748m	Putative_R-Genes,_predicted_from_Pythozome	Eutrema halophilum	TNL
Ghir_A02G003620.1	PRGDB00217730	52.5	40	19	0	1884	2003	151	190	2.9e-05	50.4	Thhalv10027862m	Putative_R-Genes,_predicted_from_Pythozome	Eutrema halophilum	TNL
Ghir_A02G003750	PRGDB00148403	29.9	127	88	1	836	1213	1384	1510	2.8e-11	70.1	clementine0.9_035959m	Putative_R-Genes,_predicted_from_Pythozome	Citrus clementina	CNL			NB-ARC domain-containing disease resistance protein (best arabidopsis hit)
Ghir_A02G003850	PRGDB00207410	48.6	175	80	3	1405	1917	328	496	7.4e-36	152.1	Aquca_009_00902.1	Putative_R-Genes,_predicted_from_Pythozome	Aquilegia coerulea	RLP
Ghir_A02G003930.1	PRGDB00078883	34.9	295	187	2	1795	920	177	469	2e-40	168.7	Vvi.16557	Putative_R-Genes,_predicted_from_NCBI_UniGene	Vitis vinifera	RLP	225441697	XM_002277255	PREDICTED: Vitis vinifera hypothetical protein LOC100262317 (LOC100262317), mRNA
Ghir_A02G003980	PRGDB00070731	44.3	79	41	2	342	578	21	96	3.9e-09	62	Mdo.689	Putative_R-Genes,_predicted_from_NCBI_UniGene	Malus x domestica	T	292668962	GU732467	Malus x domestica AP2 domain class transcription factor (AP2D43) mRNA, complete cds
Ghir_A02G004240	PRGDB00215095	30.1	561	350	12	137	1807	16	538	3.8e-63	242.7	MDP0000319352	Putative_R-Genes,_predicted_from_Pythozome	Malus x domestica	TNL
Ghir_A02G004240.1	PRGDB00215095	31	432	264	10	487	1770	137	538	3.4e-48	193	MDP0000319352	Putative_R-Genes,_predicted_from_Pythozome	Malus x domestica	TNL
Ghir_A02G004720	PRGDB00178622	74.4	1372	333	4	143	4249	1	1357	0	1988.8	POPTR_0008s20040.1	Putative_R-Genes,_predicted_from_Pythozome	Populus trichocarpa	N			Protein kinase family protein with ARM repeat domain (best arabidopsis hit)
Ghir_A02G004790	PRGDB00191790	61.3	191	74	0	261	833	289	479	2.6e-76	285.8	Lsa.51071	Putative_R-Genes,_predicted_from_NCBI_UniGene	Lactuca sativa	N	329678974	JI581480	TSA: Lactuca sativa Letassy_X1_20535 mRNA sequence
Ghir_A02G005190	PRGDB00200844	46	335	154	4	592	1530	56	385	2.7e-78	292.7	Bra008427	Putative_R-Genes,_predicted_from_Pythozome	Brassica rapa	RLP
Ghir_A02G005590	PRGDB00189838	58.4	327	132	4	677	1648	1248	1573	4.6e-103	375.2	Hv.34616	Putative_R-Genes,_predicted_from_NCBI_UniGene	Hordeum vulgare	NL	326530114	AK377143	Hordeum vulgare subsp. vulgare mRNA for predicted protein, partial cds, clone: NIASHv3149K09
Ghir_A02G005780	PRGDB00213421	51.6	277	124	1	321	1151	86	352	1.5e-76	287	MDP0000280399	Putative_R-Genes,_predicted_from_Pythozome	Malus x domestica	RLP
Ghir_A02G006290	PRGDB00152910	70.4	490	137	3	171	1625	1	487	1.2e-201	702.6	orange1.1g011363m	Putative_R-Genes,_predicted_from_Pythozome	Citrus sinensis	Mlo-like			Seven transmembrane MLO family protein (best arabidopsis hit)
Ghir_A02G006440.1	PRGDB00215739	53.6	179	63	3	420	950	20	180	3.6e-43	176.8	MDP0000180046	Putative_R-Genes,_predicted_from_Pythozome	Malus x domestica	TNL
Ghir_A02G006680	PRGDB00192108	52.4	393	161	7	234	1412	1167	1533	2.8e-103	375.9	Lsa.52993	Putative_R-Genes,_predicted_from_NCBI_UniGene	Lactuca sativa	TNL	329671470	JI573976	TSA: Lactuca sativa Letassy_X1_17963 mRNA sequence
Ghir_A02G006790	PRGDB00047070	38.3	1078	452	22	1	3054	987	1911	1.4e-189	663.3	disease resistance protein (TIR-NBS-LRR class), putative	Putative_R-Genes,_collected_from_NCBI_Protein	Arabidopsis thaliana	TNL	18414202	NM_117515	Arabidopsis thaliana disease resistance protein (TIR-NBS-LRR class), putative (AT4G14370) mRNA, complete cds.
Ghir_A02G006800	PRGDB00079067	27.1	350	227	8	78	1067	937	1278	8.7e-25	114.8	Vvi.24747	Putative_R-Genes,_predicted_from_NCBI_UniGene	Vitis vinifera	NL	225424433	XM_002281516	PREDICTED: Vitis vinifera hypothetical protein LOC100249092 (LOC100249092), mRNA
Ghir_A02G006850	PRGDB00148988	69.4	1070	318	4	281	3469	1	1068	0	1477.6	clementine0.9_001025m	Putative_R-Genes,_predicted_from_Pythozome	Citrus clementina	RLP			Leucine-rich repeat transmembrane protein kinase family protein (best arabidopsis hit)
Ghir_A02G006910	PRGDB00073207	41.2	51	29	1	783	935	785	834	0.2	37.7	Os.86222	Putative_R-Genes,_predicted_from_NCBI_UniGene	Oryza sativa Japonica Group	NL	115485442	NM_001074397	Oryza sativa Japonica Group Os11g0462900 (Os11g0462900) mRNA, complete cds
Ghir_A02G007050	PRGDB00217351	47.1	291	112	5	1659	2495	1058	1318	3.7e-66	253.4	MDP0000726867	Putative_R-Genes,_predicted_from_Pythozome	Malus x domestica	CNL
Ghir_A02G007060	PRGDB00146989	39.5	76	45	1	256	483	597	671	1.3e-07	56.2	Bradi3g58940.1	Putative_R-Genes,_predicted_from_Pythozome	Ricinus communis	NL			NB-ARC domain-containing disease resistance protein (best arabidopsis hit); RGH1A, putative, expressed (best rice hit)
Ghir_A02G007270	PRGDB00201520	53.7	190	82	3	275	835	703	889	9e-47	187.6	Bra013656	Putative_R-Genes,_predicted_from_Pythozome	Brassica rapa	RLK-GNK2
Ghir_A02G007740	PRGDB00182366	58	50	21	0	980	1129	1695	1744	1.6e-07	58.2	412710	Putative_R-Genes,_predicted_from_Pythozome	Selaginella moellendorffii	N			pleiotropic drug resistance 12 (best arabidopsis hit)
Ghir_A02G007930	PRGDB00214085	50	118	55	2	571	915	222	338	2.4e-24	114	MDP0000194411	Putative_R-Genes,_predicted_from_Pythozome	Malus x domestica	N
Ghir_A02G008070	PRGDB00070731	40.8	76	45	0	903	1130	7	82	5.6e-10	65.9	Mdo.689	Putative_R-Genes,_predicted_from_NCBI_UniGene	Malus x domestica	T	292668962	GU732467	Malus x domestica AP2 domain class transcription factor (AP2D43) mRNA, complete cds
Ghir_A02G008200	PRGDB00191694	66.2	74	25	0	906	1127	342	415	2.2e-25	117.1	Lsa.50102	Putative_R-Genes,_predicted_from_NCBI_UniGene	Lactuca sativa	N	329683061	JI585567	TSA: Lactuca sativa Letassy_X1_3887 mRNA sequence
Ghir_A02G008470	PRGDB00178167	68.8	926	284	2	302	3067	1	925	0	1278.8	POPTR_0002s11230.1	Putative_R-Genes,_predicted_from_Pythozome	Populus trichocarpa	RLP			Leucine-rich repeat transmembrane protein kinase family protein (best arabidopsis hit)
Ghir_A02G008500	PRGDB00143781	77.1	35	8	0	921	1025	169	203	5e-08	59.3	356572	Putative_R-Genes,_predicted_from_Pythozome	Arabidopsis lyrata	T			Disease resistance protein (TIR-NBS-LRR class) family (best arabidopsis hit)
Ghir_A02G009010	PRGDB00078600	29.1	175	120	1	4948	5460	372	546	9.9e-13	77.4	Vvi.5127	Putative_R-Genes,_predicted_from_NCBI_UniGene	Vitis vinifera	RLK	225449666	XM_002264215	PREDICTED: Vitis vinifera hypothetical protein LOC100253963 (LOC100253963), mRNA
Ghir_A02G009040.1	PRGDB00148579	64.2	960	306	4	306	3176	80	1004	0	1204.5	clementine0.9_034053m	Putative_R-Genes,_predicted_from_Pythozome	Citrus clementina	RLP			Leucine-rich repeat protein kinase family protein (best arabidopsis hit)
Ghir_A02G009050	PRGDB00213497	58.9	163	61	3	812	1291	11	170	2.4e-42	173.3	MDP0000439417	Putative_R-Genes,_predicted_from_Pythozome	Malus x domestica	RLP
Ghir_A02G009100	PRGDB00146307	50.7	355	156	3	258	1265	1029	1383	1.2e-94	347.1	Bradi1g72570.1	Putative_R-Genes,_predicted_from_Pythozome	Ricinus communis	RLP			Leucine-rich receptor-like protein kinase family protein (best arabidopsis hit); systemin receptor SR160 precursor, putative, expressed (best rice hit)
Ghir_A02G009260	PRGDB00186556	48.4	62	30	1	639	824	204	263	3.4e-07	55.8		Putative_R-Genes,_collected_from_NCBI_Protein	Glycine max	T	359806121	NM_001254006	Glycine max TMV resistance protein N-like (LOC100820100), mRNA.
Ghir_A02G009320	PRGDB00213363	52.5	992	415	14	573	3530	762	1703	2.1e-270	932.2	MDP0000265619	Putative_R-Genes,_predicted_from_Pythozome	Malus x domestica	N
Ghir_A02G009320.2	PRGDB00213363	56.5	671	265	9	2793	4799	1058	1703	1.4e-197	690.6	MDP0000265619	Putative_R-Genes,_predicted_from_Pythozome	Malus x domestica	N
Ghir_A02G009420	PRGDB00200844	59.8	465	147	11	851	2230	28	457	3.9e-142	505.4	Bra008427	Putative_R-Genes,_predicted_from_Pythozome	Brassica rapa	RLP
Ghir_A02G009470	PRGDB00202605	58.3	230	93	3	299	982	20	248	2.2e-79	296.2	Carubv10019327m	Putative_R-Genes,_predicted_from_Pythozome	Capsella rubella	Other
Ghir_A02G009540	PRGWK00001094	37.2	78	48	1	784	1014	1	78	1.3e-07	58.5	Solyc12g009740.1.1	Contributed_R-Genes	Solanum lycopersicum	RLP
Ghir_A02G009950	PRGDB00154607	78.6	945	197	5	70	2898	24	965	0	1490.3	orange1.1g002121m	Putative_R-Genes,_predicted_from_Pythozome	Citrus sinensis	RLP			Leucine-rich repeat protein kinase family protein (best arabidopsis hit)
Ghir_A02G010090	PRGDB00216446	34.8	351	199	7	1057	2019	915	1265	1.1e-56	221.5	MDP0000196862	Putative_R-Genes,_predicted_from_Pythozome	Malus x domestica	RLP
Ghir_A02G010170	PRGDB00177091	42.2	45	25	1	594	728	240	283	1.2	35.8	POPTR_0818s00195.1	Putative_R-Genes,_predicted_from_Pythozome	Populus trichocarpa	T			NAC domain containing protein 17 (best arabidopsis hit)
Ghir_A02G010200	PRGDB00189344	61.7	107	39	1	988	1302	1164	1270	5.2e-31	136.3	Hv.10056	Putative_R-Genes,_predicted_from_NCBI_UniGene	Hordeum vulgare	NL	326521753	AK369251	Hordeum vulgare subsp. vulgare mRNA for predicted protein, complete cds, clone: NIASHv2087M16
Ghir_A02G010240	PRGDB00214989	41.7	283	149	6	1742	2551	323	602	3e-52	206.8	MDP0000481805	Putative_R-Genes,_predicted_from_Pythozome	Malus x domestica	N
Ghir_A02G010260	PRGDB00213363	44.4	63	31	2	2795	2983	1588	1646	0.00063	46.6	MDP0000265619	Putative_R-Genes,_predicted_from_Pythozome	Malus x domestica	N
Ghir_A02G010300	PRGDB00167710	54.8	454	200	4	255	1610	881	1331	8.6e-126	451.1	Medtr2g047020.1	Putative_R-Genes,_predicted_from_Pythozome	Medicago truncatula	TNL			heat shock cognate protein 70-1 (best arabidopsis hit)
Ghir_A02G010420	PRGDB00202140	49.2	59	30	0	1529	1705	628	686	7.4e-10	66.2	Bra027791	Putative_R-Genes,_predicted_from_Pythozome	Brassica rapa	TNL
Ghir_A02G010940	PRGDB00192408	42.6	204	109	2	1410	2021	1570	1765	1.9e-44	180.6	Mtr.17858	Putative_R-Genes,_predicted_from_NCBI_UniGene	Medicago truncatula	NL	357472002	XM_003606238	Medicago truncatula NBS resistance protein (MTR_4g055630) mRNA, complete cds
Ghir_A02G011040.1	PRGDB00175193	69.4	415	126	1	990	2234	1	414	1.5e-166	586.6	POPTR_0003s13590.1	Putative_R-Genes,_predicted_from_Pythozome	Populus trichocarpa	RLP			Leucine-rich repeat protein kinase family protein (best arabidopsis hit)
Ghir_A02G011310	PRGDB00049550	55.9	111	48	1	308	640	1115	1224	1.3e-28	127.1	TTR1	Putative_R-Genes,_collected_from_NCBI_Protein	Arabidopsis thaliana	TNL	30694676	NM_123873	Arabidopsis thaliana TTR1 (WRKY domain family protein 16); transcription factor (TTR1) mRNA, complete cds.
Ghir_A02G011310.1	PRGDB00049550	56.4	110	48	0	308	637	1115	1224	8.7e-30	131	TTR1	Putative_R-Genes,_collected_from_NCBI_Protein	Arabidopsis thaliana	TNL	30694676	NM_123873	Arabidopsis thaliana TTR1 (WRKY domain family protein 16); transcription factor (TTR1) mRNA, complete cds.
Ghir_A02G011740	PRGDB00216316	65.7	405	97	6	97	1305	1	365	1.8e-134	479.2	MDP0000248430	Putative_R-Genes,_predicted_from_Pythozome	Malus x domestica	N
Ghir_A02G011860	PRGDB00217072	57.7	156	64	1	777	1238	1200	1355	3.3e-47	189.9	MDP0000261726	Putative_R-Genes,_predicted_from_Pythozome	Malus x domestica	RLP
Ghir_A02G012150	PRGDB00073072	34.9	86	54	2	600	857	221	304	2.3e-06	53.9	Os.80143	Putative_R-Genes,_predicted_from_NCBI_UniGene	Oryza sativa Japonica Group	CNL	32975074	AK065056	Oryza sativa Japonica Group cDNA clone:J013001J06, full insert sequence
Ghir_A02G012370	PRGDB00174864	79.3	889	183	1	944	3610	1	888	0	1406	POPTR_0006s05020.1	Putative_R-Genes,_predicted_from_Pythozome	Populus trichocarpa	RLP			Leucine-rich repeat protein kinase family protein (best arabidopsis hit)
Ghir_A02G012470	PRGDB00146307	50.8	364	164	2	249	1295	1021	1384	1.6e-101	369.8	Bradi1g72570.1	Putative_R-Genes,_predicted_from_Pythozome	Ricinus communis	RLP			Leucine-rich receptor-like protein kinase family protein (best arabidopsis hit); systemin receptor SR160 precursor, putative, expressed (best rice hit)
Ghir_A02G012510.1	PRGDB00182879	67.5	637	188	6	668	2572	158	777	6e-239	827	GSVIVT01001660001	Putative_R-Genes,_predicted_from_Pythozome	Vitis vinifera	N			ABC-2 type transporter family protein (best arabidopsis hit)
Ghir_A02G012520	PRGDB00204876	83.3	72	12	0	655	870	1465	1536	2e-27	123.6	Lus10019708	Putative_R-Genes,_predicted_from_Pythozome	Linum usitatissimum	TNL
Ghir_A02G012830	PRGDB00203535	74.7	778	192	2	144	2465	381	1157	0	1177.9	Carubv10019685m	Putative_R-Genes,_predicted_from_Pythozome	Capsella rubella	CN
Ghir_A02G012950	PRGDB00217808	36.7	158	96	2	397	858	29	186	8.9e-23	107.8	Thhalv10006389m	Putative_R-Genes,_predicted_from_Pythozome	Eutrema halophilum	RLP
Ghir_A02G013520	PRGDB00202169	33.3	72	39	2	715	903	178	249	0.022	40	Bra007015	Putative_R-Genes,_predicted_from_Pythozome	Brassica rapa	RLP
Ghir_A02G013670.1	PRGDB00214085	68.1	69	22	0	375	581	270	338	5.5e-19	95.1	MDP0000194411	Putative_R-Genes,_predicted_from_Pythozome	Malus x domestica	N
Ghir_A02G013910	PRGDB00217351	47.1	291	112	5	1787	2623	1058	1318	6.6e-66	253.1	MDP0000726867	Putative_R-Genes,_predicted_from_Pythozome	Malus x domestica	CNL
Ghir_A02G014450	PRGDB00187911	45.9	318	163	7	382	1320	889	1202	5.3e-73	275	Ta.74193	Putative_R-Genes,_predicted_from_NCBI_UniGene	Triticum aestivum	RLP	241988090	AK335347	Triticum aestivum cDNA, clone: WT012_K21, cultivar: Chinese Spring
Ghir_A02G014460	PRGDB00187911	42.9	315	171	6	162	1091	889	1199	9.1e-71	267.3	Ta.74193	Putative_R-Genes,_predicted_from_NCBI_UniGene	Triticum aestivum	RLP	241988090	AK335347	Triticum aestivum cDNA, clone: WT012_K21, cultivar: Chinese Spring
Ghir_A02G014700	PRGDB00148455	78.1	32	7	0	616	711	942	973	7.6e-06	52.4	clementine0.9_032089m	Putative_R-Genes,_predicted_from_Pythozome	Citrus clementina	NL			NB-ARC domain-containing disease resistance protein (best arabidopsis hit)
Ghir_A02G014820	PRGDB00177064	54	50	21	2	365	511	387	435	4.3e-09	62	29912.m005281	Putative_R-Genes,_predicted_from_Pythozome	Oryza barthii	N			Flavin-binding monooxygenase family protein (best arabidopsis hit)
Ghir_A02G014870	PRGDB00078970	51.9	320	146	5	1080	2027	1046	1361	8.4e-92	338.6	Vvi.20745	Putative_R-Genes,_predicted_from_NCBI_UniGene	Vitis vinifera	CNL	225447515	XM_002268092	PREDICTED: Vitis vinifera hypothetical protein LOC100252764 (LOC100252764), mRNA
Ghir_A02G014880	PRGDB00148468	68.7	1034	316	4	469	3552	28	1059	0	1375.9	clementine0.9_001086m	Putative_R-Genes,_predicted_from_Pythozome	Citrus clementina	RLP			Leucine-rich receptor-like protein kinase family protein (best arabidopsis hit)
Ghir_A02G014980.1	PRGDB00078883	38.2	131	77	2	2113	1730	373	502	1.1e-11	73.2	Vvi.16557	Putative_R-Genes,_predicted_from_NCBI_UniGene	Vitis vinifera	RLP	225441697	XM_002277255	PREDICTED: Vitis vinifera hypothetical protein LOC100262317 (LOC100262317), mRNA
Ghir_A02G015100	PRGDB00148473	70.2	1170	346	3	493	3996	15	1183	0	1625.9	clementine0.9_000750m	Putative_R-Genes,_predicted_from_Pythozome	Citrus clementina	RLP			Leucine-rich receptor-like protein kinase family protein (best arabidopsis hit)
Ghir_A02G015170	PRGDB00070731	50.8	59	29	0	745	921	28	86	8.6e-10	65.1	Mdo.689	Putative_R-Genes,_predicted_from_NCBI_UniGene	Malus x domestica	T	292668962	GU732467	Malus x domestica AP2 domain class transcription factor (AP2D43) mRNA, complete cds
Ghir_A02G015930	PRGDB00070731	37.2	78	48	1	772	1002	5	82	1.1e-07	58.2	Mdo.689	Putative_R-Genes,_predicted_from_NCBI_UniGene	Malus x domestica	T	292668962	GU732467	Malus x domestica AP2 domain class transcription factor (AP2D43) mRNA, complete cds
Ghir_A02G016000	PRGDB00173248	58.4	813	310	8	248	2623	1	806	6.2e-268	924.1	ppa001508m	Putative_R-Genes,_predicted_from_Pythozome	Prunus persica	CN			U-box domain-containing protein kinase family protein (best arabidopsis hit)
Ghir_A02G016290	PRGDB00155597	81.2	994	180	3	262	3228	20	1011	0	1605.1	orange1.1g001816m	Putative_R-Genes,_predicted_from_Pythozome	Citrus sinensis	RLP			Leucine-rich receptor-like protein kinase family protein (best arabidopsis hit)
Ghir_A02G016300	PRGDB00165970	78.9	1012	205	3	134	3169	12	1014	0	1593.2	cassava4.1_000864m	Putative_R-Genes,_predicted_from_Pythozome	Vitis aestivalis	RLP			Leucine-rich receptor-like protein kinase family protein (best arabidopsis hit)
Ghir_A02G016360.1	PRGDB00148403	31.1	74	49	1	1129	914	1376	1449	4.2e-06	53.1	clementine0.9_035959m	Putative_R-Genes,_predicted_from_Pythozome	Citrus clementina	CNL			NB-ARC domain-containing disease resistance protein (best arabidopsis hit)
Ghir_A02G016910	PRGDB00191296	39	310	182	5	2051	2959	209	518	5e-49	196.4	Lsa.44031	Putative_R-Genes,_predicted_from_NCBI_UniGene	Lactuca sativa	N	329679120	JI581626	TSA: Lactuca sativa CLC_LTR_V1A_17001 mRNA sequence
Ghir_A02G016910.4	PRGDB00191296	39	310	182	5	2178	3086	209	518	5.2e-49	196.4	Lsa.44031	Putative_R-Genes,_predicted_from_NCBI_UniGene	Lactuca sativa	N	329679120	JI581626	TSA: Lactuca sativa CLC_LTR_V1A_17001 mRNA sequence
Ghir_A02G017000	PRGDB00150496	56.2	769	280	9	31	2184	8	770	6e-229	793.5	evm.model.supercontig_6.100	Putative_R-Genes,_predicted_from_Pythozome	Arabidopsis lyrata subsp. lyrata	RLP			Leucine-rich repeat protein kinase family protein (best arabidopsis hit)
Ghir_A02G017100	PRGDB00155561	64.3	647	208	6	362	2248	25	666	1.1e-229	796.2	orange1.1g005999m	Putative_R-Genes,_predicted_from_Pythozome	Citrus sinensis	RLP			Leucine-rich repeat protein kinase family protein (best arabidopsis hit)
Ghir_A02G017120	PRGDB00217028	41.2	97	52	2	330	611	20	114	4.2e-13	75.9	MDP0000191680	Putative_R-Genes,_predicted_from_Pythozome	Malus x domestica	T
Ghir_A02G017360	PRGDB00070731	35.2	105	58	1	266	580	21	115	2.2e-10	66.2	Mdo.689	Putative_R-Genes,_predicted_from_NCBI_UniGene	Malus x domestica	T	292668962	GU732467	Malus x domestica AP2 domain class transcription factor (AP2D43) mRNA, complete cds
Ghir_A02G017630	PRGDB00147571	54.5	222	96	2	1085	1741	870	1089	2.5e-59	230.7	clementine0.9_000952m	Putative_R-Genes,_predicted_from_Pythozome	Citrus clementina	RLP			Leucine-rich repeat protein kinase family protein (best arabidopsis hit)
Ghir_A02G017690	PRGDB00072356	36.6	123	66	2	1262	1606	1081	1199	3.5e-11	70.5	Os.35691	Putative_R-Genes,_predicted_from_NCBI_UniGene	Oryza sativa Japonica Group	RLP	32976298	AK066280	Oryza sativa Japonica Group cDNA clone:J013066D13, full insert sequence
Ghir_A02G018240	PRGDB00202436	36.5	704	400	11	537	2642	1249	1907	2.2e-123	443.4	Bra010551	Putative_R-Genes,_predicted_from_Pythozome	Brassica rapa	CNL
Ghir_A02G018350	PRGDB00201975	52.6	367	155	6	454	1533	34	388	2.2e-107	389.4	Bra036845	Putative_R-Genes,_predicted_from_Pythozome	Brassica rapa	CNL
Ghir_A02G018380	PRGDB00147216	81	269	51	0	1	807	806	1074	6.8e-128	456.8	Bradi4g24910.1	Putative_R-Genes,_predicted_from_Pythozome	Ricinus communis	RLP			mitogen-activated protein kinase 1 (best arabidopsis hit); CGMC_MAPKCMGC_2_SLT2y_ERK.2 - CGMC includes CDA, MAPK, GSK3, and CLKC kinases, expressed (best rice hit)
Ghir_A02G018420.1	PRGDB00188700	58.5	920	363	6	47	2770	30	942	1.6e-300	1031.9	Gma.37111	Putative_R-Genes,_predicted_from_NCBI_UniGene	Glycine max	CNL	356496702	XM_003517157	PREDICTED: Glycine max disease resistance RPP8-like protein 3-like (LOC100788025), mRNA
Ghir_A02G018550	PRGDB00150499	71.2	1134	317	5	224	3595	6	1139	0	1552.3	evm.model.supercontig_6.224	Putative_R-Genes,_predicted_from_Pythozome	Arabidopsis lyrata subsp. lyrata	RLP			Leucine-rich receptor-like protein kinase family protein (best arabidopsis hit)
Ghir_A02G018620	PRGDB00201975	44.7	409	204	7	175	1365	34	432	2.2e-90	332.8	Bra036845	Putative_R-Genes,_predicted_from_Pythozome	Brassica rapa	CNL
Ghir_A02G018790	PRGDB00216062	83.7	49	8	0	151	297	1	49	4.2e-16	85.5	MDP0000255546	Putative_R-Genes,_predicted_from_Pythozome	Malus x domestica	NL
Ghir_A02G019190	PRGDB00181635	32.5	237	129	8	88	711	13	247	4.4e-25	116.3	Si025833m	Putative_R-Genes,_predicted_from_Pythozome	Setaria italica	NL			NAC domain containing protein 90 (best arabidopsis hit); NBS-LRR disease resistance protein, putative, expressed (best rice hit)
Ghir_A02G019270	PRGDB00216620	44.5	110	52	2	1195	1521	326	427	6.2e-19	95.9	MDP0000287465	Putative_R-Genes,_predicted_from_Pythozome	Malus x domestica	N
Ghir_A02G019270.1	PRGDB00216620	44.5	110	52	2	826	1152	326	427	5.2e-19	95.9	MDP0000287465	Putative_R-Genes,_predicted_from_Pythozome	Malus x domestica	N
Ghir_A02G019280	PRGDB00192459	52	127	60	1	702	1082	207	332	4.4e-32	139.4	Mtr.22577	Putative_R-Genes,_predicted_from_NCBI_UniGene	Medicago truncatula	CNL	357509266	XM_003624874	Medicago truncatula NB-LRR type disease resistance protein (MTR_7g089080) mRNA, complete cds
Ghir_A02G019450	PRGDB00213421	67.1	334	108	1	1598	2593	46	379	5.8e-121	435.3	MDP0000280399	Putative_R-Genes,_predicted_from_Pythozome	Malus x domestica	RLP
Ghir_A02G019450.1	PRGDB00213421	70.1	301	90	0	2126	3028	79	379	6.8e-118	425.2	MDP0000280399	Putative_R-Genes,_predicted_from_Pythozome	Malus x domestica	RLP
Ghir_A02G019500	PRGDB00217081	42.9	140	67	2	948	1367	1	127	1.1e-24	115.2	MDP0000283149	Putative_R-Genes,_predicted_from_Pythozome	Malus x domestica	TNL
Ghir_A02G019500.3	PRGDB00217081	43.3	141	67	2	868	1290	1	128	3.1e-25	117.1	MDP0000283149	Putative_R-Genes,_predicted_from_Pythozome	Malus x domestica	TNL
Ghir_A03G000050	PRGDB00143461	40	95	52	2	202	474	5	98	1.7e-15	83.2	476148	Putative_R-Genes,_predicted_from_Pythozome	Arabidopsis lyrata	Other			receptor serine/threonine kinase, putative (best arabidopsis hit)
Ghir_A03G000100	PRGDB00177064	42.9	56	30	2	1364	1528	379	433	4.3e-07	56.2	29912.m005281	Putative_R-Genes,_predicted_from_Pythozome	Oryza barthii	N			Flavin-binding monooxygenase family protein (best arabidopsis hit)
Ghir_A03G000110	PRGDB00205260	61	210	77	2	520	1134	39	248	1e-64	247.3	Lus10035674	Putative_R-Genes,_predicted_from_Pythozome	Linum usitatissimum	TNL
Ghir_A03G000450	PRGDB00078803	50.2	1221	592	6	315	3938	28	1245	0	1187.9	Vvi.12916	Putative_R-Genes,_predicted_from_NCBI_UniGene	Vitis vinifera	N	225452756	XM_002283015	PREDICTED: Vitis vinifera hypothetical protein LOC100262734 (LOC100262734), mRNA
Ghir_A03G000640	PRGDB00216316	28.9	284	177	5	618	1469	95	353	7e-18	92	MDP0000248430	Putative_R-Genes,_predicted_from_Pythozome	Malus x domestica	N
Ghir_A03G001170	PRGDB00070731	53.7	82	31	2	724	951	5	85	1e-16	87.8	Mdo.689	Putative_R-Genes,_predicted_from_NCBI_UniGene	Malus x domestica	T	292668962	GU732467	Malus x domestica AP2 domain class transcription factor (AP2D43) mRNA, complete cds
Ghir_A03G001620	PRGDB00165376	48.7	152	69	5	3404	3853	1005	1149	8e-23	109.8	cassava4.1_034199m	Putative_R-Genes,_predicted_from_Pythozome	Vitis aestivalis	CNL			NB-ARC domain-containing disease resistance protein (best arabidopsis hit)
Ghir_A03G001640	PRGDB00165376	34.3	344	171	14	2788	3747	768	1080	5.6e-24	113.6	cassava4.1_034199m	Putative_R-Genes,_predicted_from_Pythozome	Vitis aestivalis	CNL			NB-ARC domain-containing disease resistance protein (best arabidopsis hit)
Ghir_A03G001860	PRGDB00073503	28	482	338	7	684	2117	1574	2050	9.8e-53	208.4	Os.99749	Putative_R-Genes,_predicted_from_NCBI_UniGene	Oryza sativa Japonica Group	CN	297720030	NM_001185448	Oryza sativa Japonica Group Os01g0516800 (Os01g0516800) mRNA, complete cds
Ghir_A03G001980	PRGDB00161715	50.6	859	403	9	132	2675	1	849	5.8e-232	803.9	cassava4.1_001587m	Putative_R-Genes,_predicted_from_Pythozome	Vitis aestivalis	CNL			NB-ARC domain-containing disease resistance protein (best arabidopsis hit)
Ghir_A03G002080	PRGDB00186618	50.7	73	33	1	277	486	32	104	6.8e-11	68.2		Putative_R-Genes,_collected_from_NCBI_Protein	Brachypodium distachyon	NL	357127893	XM_003565564	PREDICTED: Brachypodium distachyon disease resistance protein RPH8A-like (LOC100842838), mRNA.
Ghir_A03G002300	PRGDB00189850	52.7	205	88	4	336	926	28	231	1.4e-65	250	Hv.34869	Putative_R-Genes,_predicted_from_NCBI_UniGene	Hordeum vulgare	Other	326526852	AK369614	Hordeum vulgare subsp. vulgare mRNA for predicted protein, complete cds, clone: NIASHv2094G16
Ghir_A03G002360	PRGDB00163861	72.8	629	169	2	410	2290	20	648	9.1e-277	952.6	cassava4.1_003177m	Putative_R-Genes,_predicted_from_Pythozome	Vitis aestivalis	RLP			Leucine-rich repeat protein kinase family protein (best arabidopsis hit)
Ghir_A03G002380.1	PRGDB00184271	91.5	47	3	1	350	490	662	707	9.9e-18	91.7	GRMZM2G162531_T01	Putative_R-Genes,_predicted_from_Pythozome	Zea mays	RLP			STRUBBELIG-receptor family 8 (best arabidopsis hit); STRUBBELIG-RECEPTOR FAMILY 7 precursor, putative, expressed (best rice hit)
Ghir_A03G002820	PRGDB00192108	38.4	385	212	13	207	1343	1168	1533	1.3e-59	230.7	Lsa.52993	Putative_R-Genes,_predicted_from_NCBI_UniGene	Lactuca sativa	TNL	329671470	JI573976	TSA: Lactuca sativa Letassy_X1_17963 mRNA sequence
Ghir_A03G002880	PRGDB00216316	25.9	166	114	2	259	753	181	338	2.4e-09	63.5	MDP0000248430	Putative_R-Genes,_predicted_from_Pythozome	Malus x domestica	N
Ghir_A03G002910	PRGDB00177064	44.7	47	25	1	914	1051	387	433	8.3e-07	55.1	29912.m005281	Putative_R-Genes,_predicted_from_Pythozome	Oryza barthii	N			Flavin-binding monooxygenase family protein (best arabidopsis hit)
Ghir_A03G003020	PRGDB00156306	87.7	350	43	0	1669	2718	287	636	2.8e-176	619	orange1.1g006696m	Putative_R-Genes,_predicted_from_Pythozome	Citrus sinensis	RLP			Leucine-rich repeat protein kinase family protein (best arabidopsis hit)
Ghir_A03G003020.2	PRGDB00156306	87.7	350	43	0	3042	4091	287	636	4.1e-176	619	orange1.1g006696m	Putative_R-Genes,_predicted_from_Pythozome	Citrus sinensis	RLP			Leucine-rich repeat protein kinase family protein (best arabidopsis hit)
Ghir_A03G003260	PRGWK00001242	30.7	88	60	1	2183	2446	147	233	0.00026	48.1	Sotub01g037760.1.1	Contributed_R-Genes	Solanum tuberosum	RLP
Ghir_A03G003260.5	PRGWK00001242	29	214	116	6	3280	3897	61	246	1.5e-07	59.3	Sotub01g037760.1.1	Contributed_R-Genes	Solanum tuberosum	RLP
Ghir_A03G003270	PRGDB00047998	45.7	46	24	1	1840	1977	489	533	0.004	43.9	AT4g12370	Putative_R-Genes,_collected_from_NCBI_Protein	Arabidopsis thaliana	TNL	7267889	AL161533	Arabidopsis thaliana DNA chromosome 4, contig fragment No. 33.
Ghir_A03G003330	PRGDB00156340	49.8	683	293	9	3412	1430	189	843	1e-182	640.6	orange1.1g036168m	Putative_R-Genes,_predicted_from_Pythozome	Citrus sinensis	CNL			NB-ARC domain-containing disease resistance protein (best arabidopsis hit)
Ghir_A03G003350	PRGDB00149355	73.3	131	35	0	545	937	1446	1576	2.6e-56	219.5	clementine0.9_000252m	Putative_R-Genes,_predicted_from_Pythozome	Citrus clementina	CNL			NB-ARC domain-containing disease resistance protein (best arabidopsis hit)
Ghir_A03G003410	PRGDB00217119	55.6	252	96	5	422	1141	1	248	1.5e-69	263.8	MDP0000320460	Putative_R-Genes,_predicted_from_Pythozome	Malus x domestica	RLP
Ghir_A03G003580.1	PRGDB00213421	39.3	117	65	2	1265	1606	129	242	3.7e-15	83.6	MDP0000280399	Putative_R-Genes,_predicted_from_Pythozome	Malus x domestica	RLP
Ghir_A03G003600	PRGDB00191790	53.8	184	84	1	296	847	297	479	2.9e-64	245.7	Lsa.51071	Putative_R-Genes,_predicted_from_NCBI_UniGene	Lactuca sativa	N	329678974	JI581480	TSA: Lactuca sativa Letassy_X1_20535 mRNA sequence
Ghir_A03G003760	PRGDB00068820	84.5	258	40	0	286	1059	36	293	4.7e-122	438.7	Gma.7643	Putative_R-Genes,_predicted_from_NCBI_UniGene	Glycine max	NL	210144184	AK286966	Glycine max cDNA, clone: GMFL01-41-C06
Ghir_A03G003800	PRGDB00175775	84.1	690	110	0	508	2577	30	719	0	1161	POPTR_0004s22390.1	Putative_R-Genes,_predicted_from_Pythozome	Populus trichocarpa	N			ABC-2 type transporter family protein (best arabidopsis hit)
Ghir_A03G004000	PRGDB00156657	56.3	71	31	0	1089	1301	214	284	1.7e-15	84	Glyma03g23250.1	Putative_R-Genes,_predicted_from_Pythozome	Glycine max	T			GATA transcription factor 2 (best arabidopsis hit)
Ghir_A03G004090	PRGDB00215703	57.6	66	17	1	714	911	913	967	5.6e-10	66.2	MDP0000160795	Putative_R-Genes,_predicted_from_Pythozome	Malus x domestica	CNL
Ghir_A03G004570	PRGDB00204808	70.1	97	28	1	235	525	1649	1744	7.4e-29	127.9	GRMZM2G060054_T03	Putative_R-Genes,_predicted_from_Pythozome	Zea mays	CNL
Ghir_A03G004610	PRGDB00211657	51.8	56	26	1	319	486	666	720	2.5e-09	63.2	Eucgr.H02157.1	Putative_R-Genes,_predicted_from_Pythozome	Eucalyptus grandis	TNL
Ghir_A03G004890	PRGDB00167710	80.7	393	74	1	45	1223	878	1268	4.9e-175	614.4	Medtr2g047020.1	Putative_R-Genes,_predicted_from_Pythozome	Medicago truncatula	TNL			heat shock cognate protein 70-1 (best arabidopsis hit)
Ghir_A03G004920	PRGDB00191296	58	286	119	1	1863	2717	238	523	4.8e-89	329.3	Lsa.44031	Putative_R-Genes,_predicted_from_NCBI_UniGene	Lactuca sativa	N	329679120	JI581626	TSA: Lactuca sativa CLC_LTR_V1A_17001 mRNA sequence
Ghir_A03G004940	PRGDB00049789	60.4	225	64	1	744	1343	2	226	3.6e-71	269.2	putative RING zinc finger ankyrin protein	Putative_R-Genes,_collected_from_NCBI_Protein	Sorghum bicolor	N	190688725	EU810765	Sorghum bicolor clone BAC Sbb12448, complete sequence.
Ghir_A03G005040	PRGDB00200918	36.7	109	65	3	1525	1851	724	828	1.7e-14	81.3	Bra023648	Putative_R-Genes,_predicted_from_Pythozome	Brassica rapa	TNL
Ghir_A03G005130.1	PRGDB00200918	31.2	189	116	7	1402	1947	676	857	5.6e-21	102.8	Bra023648	Putative_R-Genes,_predicted_from_Pythozome	Brassica rapa	TNL
Ghir_A03G005310	PRGDB00177064	41.8	55	31	1	881	1042	379	433	3e-06	53.5	29912.m005281	Putative_R-Genes,_predicted_from_Pythozome	Oryza barthii	N			Flavin-binding monooxygenase family protein (best arabidopsis hit)
Ghir_A03G005310.1	PRGDB00177064	41.8	55	31	1	1449	1610	379	433	3.9e-06	53.5	29912.m005281	Putative_R-Genes,_predicted_from_Pythozome	Oryza barthii	N			Flavin-binding monooxygenase family protein (best arabidopsis hit)
Ghir_A03G005340	PRGDB00183352	37.1	477	249	6	223	1590	1447	1893	1.7e-79	296.6	GSVIVT01015461001	Putative_R-Genes,_predicted_from_Pythozome	Vitis vinifera	N			pleiotropic drug resistance 12 (best arabidopsis hit)
Ghir_A03G005650	PRGDB00184271	89.4	47	4	1	313	453	662	707	3.4e-17	89.7	GRMZM2G162531_T01	Putative_R-Genes,_predicted_from_Pythozome	Zea mays	RLP			STRUBBELIG-receptor family 8 (best arabidopsis hit); STRUBBELIG-RECEPTOR FAMILY 7 precursor, putative, expressed (best rice hit)
Ghir_A03G005790	PRGDB00215095	29.8	533	329	12	185	1774	18	508	6.3e-61	235.3	MDP0000319352	Putative_R-Genes,_predicted_from_Pythozome	Malus x domestica	TNL
Ghir_A03G005840	PRGDB00182255	38.5	174	75	3	1082	1603	1528	1669	7.9e-21	102.8	441722	Putative_R-Genes,_predicted_from_Pythozome	Selaginella moellendorffii	N			pleiotropic drug resistance 12 (best arabidopsis hit)
Ghir_A03G006070	PRGDB00201975	41.2	277	145	3	686	1483	117	386	2.2e-52	206.8	Bra036845	Putative_R-Genes,_predicted_from_Pythozome	Brassica rapa	CNL
Ghir_A03G006490	PRGDB00214226	42.1	273	117	11	216	1010	761	1000	3.7e-38	159.1	MDP0000309192	Putative_R-Genes,_predicted_from_Pythozome	Malus x domestica	CNL
Ghir_A03G007060	PRGDB00070731	52.2	69	32	1	464	670	18	85	4.4e-12	72.4	Mdo.689	Putative_R-Genes,_predicted_from_NCBI_UniGene	Malus x domestica	T	292668962	GU732467	Malus x domestica AP2 domain class transcription factor (AP2D43) mRNA, complete cds
Ghir_A03G007130	PRGDB00215645	79.9	174	35	0	444	965	432	605	4.6e-74	278.5	MDP0000303549	Putative_R-Genes,_predicted_from_Pythozome	Malus x domestica	NL
Ghir_A03G007130.1	PRGDB00214067	83.5	91	15	0	444	716	627	717	2e-37	157.1	MDP0000308010	Putative_R-Genes,_predicted_from_Pythozome	Malus x domestica	NL
Ghir_A03G007460	PRGDB00176206	67.9	611	185	3	166	1992	25	626	5.3e-241	833.6	POPTR_0012s09230.1	Putative_R-Genes,_predicted_from_Pythozome	Populus trichocarpa	RLP			Leucine-rich repeat protein kinase family protein (best arabidopsis hit)
Ghir_A03G008250	PRGDB00078815	29.9	221	115	7	248	826	145	353	3.8e-14	79.3	Vvi.13914	Putative_R-Genes,_predicted_from_NCBI_UniGene	Vitis vinifera	RLP	225423461	XM_002274011	PREDICTED: Vitis vinifera hypothetical protein LOC100267943 (LOC100267943), mRNA
Ghir_A03G008280.1	PRGDB00078883	37.3	134	79	3	2278	1880	237	366	2e-15	85.9	Vvi.16557	Putative_R-Genes,_predicted_from_NCBI_UniGene	Vitis vinifera	RLP	225441697	XM_002277255	PREDICTED: Vitis vinifera hypothetical protein LOC100262317 (LOC100262317), mRNA
Ghir_A03G008310	PRGDB00200719	26.8	280	174	7	414	1247	25	275	1.5e-16	88.2	Bra005270	Putative_R-Genes,_predicted_from_Pythozome	Brassica rapa	CNL
Ghir_A03G009150	PRGDB00070731	53.1	32	13	1	547	636	97	128	12	31.2	Mdo.689	Putative_R-Genes,_predicted_from_NCBI_UniGene	Malus x domestica	T	292668962	GU732467	Malus x domestica AP2 domain class transcription factor (AP2D43) mRNA, complete cds
Ghir_A03G009910	PRGDB00208610	64.3	602	212	3	627	2423	76	677	1.5e-217	756.1	Aquca_016_00415.3	Putative_R-Genes,_predicted_from_Pythozome	Aquilegia coerulea	RLP
Ghir_A03G009940	PRGDB00063797	30.1	136	88	3	358	744	230	365	4e-08	59.3	hypothetical protein	Putative_R-Genes,_collected_from_NCBI_Protein	Sorghum bicolor	T	242047787	XM_002461595	Sorghum bicolor hypothetical protein, mRNA.
Ghir_A03G010080	PRGDB00177800	69	1105	329	9	445	3750	1	1095	0	1498	30147.m013904	Putative_R-Genes,_predicted_from_Pythozome	Oryza barthii	RLP			Leucine-rich receptor-like protein kinase family protein (best arabidopsis hit)
Ghir_A03G010340	PRGDB00173972	65.2	632	210	3	377	2272	21	642	2.5e-224	778.5	ppa002536m	Putative_R-Genes,_predicted_from_Pythozome	Prunus persica	RLP			receptor-like kinase 1 (best arabidopsis hit)
Ghir_A03G010480	PRGDB00217738	31.8	85	58	0	557	811	186	270	4.3e-05	48.9	Thhalv10027802m	Putative_R-Genes,_predicted_from_Pythozome	Eutrema halophilum	TNL
Ghir_A03G010650	PRGDB00216779	67.3	49	13	1	1229	1375	1151	1196	9.6e-10	65.1	MDP0000600203	Putative_R-Genes,_predicted_from_Pythozome	Malus x domestica	RLP
Ghir_A03G010650.1	PRGDB00216779	67.3	49	13	1	1750	1896	1151	1196	1.2e-09	65.1	MDP0000600203	Putative_R-Genes,_predicted_from_Pythozome	Malus x domestica	RLP
Ghir_A03G010790.1	PRGDB00214485	58.1	136	57	0	1190	1597	844	979	1.3e-43	177.6	MDP0000287433	Putative_R-Genes,_predicted_from_Pythozome	Malus x domestica	CN
Ghir_A03G010890	PRGDB00078682	41.4	70	38	2	996	1196	783	852	1.6e-07	57.8	Vvi.8276	Putative_R-Genes,_predicted_from_NCBI_UniGene	Vitis vinifera	NL	225452519	XM_002275052	PREDICTED: Vitis vinifera hypothetical protein LOC100250803 (LOC100250803), mRNA
Ghir_A03G010970	PRGDB00201252	44.3	88	45	2	669	926	848	933	5.2e-11	70.1	Bra018936	Putative_R-Genes,_predicted_from_Pythozome	Brassica rapa	RLP
Ghir_A03G011000	PRGDB00189344	61.4	83	31	1	981	1226	1178	1260	3.6e-22	106.7	Hv.10056	Putative_R-Genes,_predicted_from_NCBI_UniGene	Hordeum vulgare	NL	326521753	AK369251	Hordeum vulgare subsp. vulgare mRNA for predicted protein, complete cds, clone: NIASHv2087M16
Ghir_A03G011010	PRGWK00000726	64.5	603	199	7	152	1930	27	624	4.6e-226	784.3	Solyc05g009800.1.1	Contributed_R-Genes	Solanum lycopersicum	RLP-Malectin
Ghir_A03G011120	PRGDB00148144	62.7	730	258	5	595	2745	11	739	3.8e-258	891	clementine0.9_003331m	Putative_R-Genes,_predicted_from_Pythozome	Citrus clementina	RLP			Leucine-rich repeat protein kinase family protein (best arabidopsis hit)
Ghir_A03G011390	PRGDB00143316	49.4	77	37	2	498	722	642	718	4e-11	68.9	915422	Putative_R-Genes,_predicted_from_Pythozome	Arabidopsis lyrata	TNL			Disease resistance protein (TIR-NBS-LRR class) family (best arabidopsis hit)
Ghir_A03G011400	PRGDB00215095	30.9	512	310	11	288	1820	59	527	5.6e-56	218.8	MDP0000319352	Putative_R-Genes,_predicted_from_Pythozome	Malus x domestica	TNL
Ghir_A03G011520	PRGDB00177091	44.2	154	78	4	508	963	240	387	3.1e-29	129.8	POPTR_0818s00195.1	Putative_R-Genes,_predicted_from_Pythozome	Populus trichocarpa	T			NAC domain containing protein 17 (best arabidopsis hit)
Ghir_A03G012140	PRGDB00204257	39.2	79	34	3	352	585	503	568	0.00018	47.4	Bradi5g25117.1	Putative_R-Genes,_predicted_from_Pythozome	Brachypodium distachyon	RLP
Ghir_A03G012210	PRGDB00195495	28.8	156	100	3	1	450	1294	1444	3e-11	68.2	Phvulv091018313m	Putative_R-Genes,_predicted_from_Pythozome	Phaseolus vulgaris	TNL
Ghir_A03G012330	PRGDB00150346	70.9	1021	280	7	479	3496	1	1019	0	1429.8	clementine0.9_001243m	Putative_R-Genes,_predicted_from_Pythozome	Citrus clementina	RLP			phytosulfokin receptor 1 (best arabidopsis hit)
Ghir_A03G012370	PRGDB00217252	27.3	183	125	5	1654	2193	1363	1540	2.6e-11	70.9	MDP0000284128	Putative_R-Genes,_predicted_from_Pythozome	Malus x domestica	RLP
Ghir_A03G012540	PRGDB00079067	66.2	429	142	3	296	1579	923	1349	1.1e-159	563.1	Vvi.24747	Putative_R-Genes,_predicted_from_NCBI_UniGene	Vitis vinifera	NL	225424433	XM_002281516	PREDICTED: Vitis vinifera hypothetical protein LOC100249092 (LOC100249092), mRNA
Ghir_A03G013520	PRGDB00165191	45.2	93	49	1	529	807	860	950	2.1e-17	89.7	mgv1a000858m	Putative_R-Genes,_predicted_from_Pythozome	Cucumis x hytivus	NL			NB-ARC domain-containing disease resistance protein (best arabidopsis hit)
Ghir_A03G013620.1	PRGDB00215362	36	125	67	5	1198	1551	722	840	1.2e-07	58.2	MDP0000769222	Putative_R-Genes,_predicted_from_Pythozome	Malus x domestica	CNL
Ghir_A03G013820	PRGDB00211657	71.1	45	13	0	358	492	670	714	1.2e-12	74.3	Eucgr.H02157.1	Putative_R-Genes,_predicted_from_Pythozome	Eucalyptus grandis	TNL
Ghir_A03G014240	PRGDB00164072	79.9	683	130	6	326	2368	38	715	0	1092.4	cassava4.1_002604m	Putative_R-Genes,_predicted_from_Pythozome	Vitis aestivalis	RLP			Leucine-rich repeat protein kinase family protein (best arabidopsis hit)
Ghir_A03G014410.2	PRGDB00148403	30.4	112	77	1	473	141	1385	1496	3.3e-08	60.1	clementine0.9_035959m	Putative_R-Genes,_predicted_from_Pythozome	Citrus clementina	CNL			NB-ARC domain-containing disease resistance protein (best arabidopsis hit)
Ghir_A03G014450	PRGDB00078803	30.3	198	122	4	2235	2786	391	586	4.2e-15	84.3	Vvi.12916	Putative_R-Genes,_predicted_from_NCBI_UniGene	Vitis vinifera	N	225452756	XM_002283015	PREDICTED: Vitis vinifera hypothetical protein LOC100262734 (LOC100262734), mRNA
Ghir_A03G014450.1	PRGDB00078803	30.3	198	122	4	2089	2640	391	586	4.1e-15	84.3	Vvi.12916	Putative_R-Genes,_predicted_from_NCBI_UniGene	Vitis vinifera	N	225452756	XM_002283015	PREDICTED: Vitis vinifera hypothetical protein LOC100262734 (LOC100262734), mRNA
Ghir_A03G014500.1	PRGDB00189912	27.8	352	217	9	982	1935	197	545	6.6e-27	122.5	Hv.36068	Putative_R-Genes,_predicted_from_NCBI_UniGene	Hordeum vulgare	N	326508777	AK364708	Hordeum vulgare subsp. vulgare mRNA for predicted protein, complete cds, clone: NIASHv2027L24
Ghir_A03G014580	PRGDB00216651	83.8	37	6	0	304	414	1256	1292	6.2e-12	71.2	MDP0000230932	Putative_R-Genes,_predicted_from_Pythozome	Malus x domestica	CNL
Ghir_A03G014580.1	PRGDB00216651	83.8	37	6	0	549	659	1256	1292	7.9e-12	71.2	MDP0000230932	Putative_R-Genes,_predicted_from_Pythozome	Malus x domestica	CNL
Ghir_A03G015360	PRGDB00213507	48.7	304	128	5	301	1185	82	366	4.6e-72	271.9	MDP0000288100	Putative_R-Genes,_predicted_from_Pythozome	Malus x domestica	NL
Ghir_A03G015360.1	PRGDB00213507	59	144	59	0	133	564	223	366	7.2e-45	181.4	MDP0000288100	Putative_R-Genes,_predicted_from_Pythozome	Malus x domestica	NL
Ghir_A03G015670	PRGDB00191296	34.3	297	187	6	1108	1995	237	526	1.5e-32	141	Lsa.44031	Putative_R-Genes,_predicted_from_NCBI_UniGene	Lactuca sativa	N	329679120	JI581626	TSA: Lactuca sativa CLC_LTR_V1A_17001 mRNA sequence
Ghir_A03G015790	PRGDB00078682	57.3	281	104	6	188	1018	739	1007	9.8e-76	283.9	Vvi.8276	Putative_R-Genes,_predicted_from_NCBI_UniGene	Vitis vinifera	NL	225452519	XM_002275052	PREDICTED: Vitis vinifera hypothetical protein LOC100250803 (LOC100250803), mRNA
Ghir_A03G015930	PRGDB00192459	25.7	191	134	4	549	1115	253	437	3.5e-06	53.5	Mtr.22577	Putative_R-Genes,_predicted_from_NCBI_UniGene	Medicago truncatula	CNL	357509266	XM_003624874	Medicago truncatula NB-LRR type disease resistance protein (MTR_7g089080) mRNA, complete cds
Ghir_A03G015940.3	PRGWK00001790	34.8	89	58	0	985	1251	7	95	9.4e-08	58.9	Sotub06g019720.1.1	Contributed_R-Genes	Solanum tuberosum	TN
Ghir_A03G016080	PRGDB00205338	34.9	510	303	11	995	2473	961	1458	1.3e-76	287.7	Lus10015091	Putative_R-Genes,_predicted_from_Pythozome	Linum usitatissimum	RLK-GNK2
Ghir_A03G016150	PRGDB00166539	72.2	582	131	3	73	1740	23	599	6.7e-239	826.2	cassava4.1_003949m	Putative_R-Genes,_predicted_from_Pythozome	Vitis aestivalis	RLP			Leucine-rich repeat protein kinase family protein (best arabidopsis hit)
Ghir_A03G016180	PRGDB00152768	54.7	1378	554	16	196	4158	6	1370	0	1422.9	orange1.1g000630m	Putative_R-Genes,_predicted_from_Pythozome	Citrus sinensis	TNL			transmembrane receptors;ATP binding (best arabidopsis hit)
Ghir_A03G016530	PRGDB00150537	77.2	648	144	4	329	2272	31	674	1.5e-291	1001.9	evm.model.supercontig_65.54	Putative_R-Genes,_predicted_from_Pythozome	Arabidopsis lyrata subsp. lyrata	RLP			leucine-rich repeat transmembrane protein kinase family protein (best arabidopsis hit)
Ghir_A03G016760	PRGDB00177091	50.8	124	54	6	1032	1391	240	360	2.2e-21	104	POPTR_0818s00195.1	Putative_R-Genes,_predicted_from_Pythozome	Populus trichocarpa	T			NAC domain containing protein 17 (best arabidopsis hit)
Ghir_A03G016980	PRGDB00070731	42.7	82	43	1	1820	2065	26	103	8e-11	69.3	Mdo.689	Putative_R-Genes,_predicted_from_NCBI_UniGene	Malus x domestica	T	292668962	GU732467	Malus x domestica AP2 domain class transcription factor (AP2D43) mRNA, complete cds
Ghir_A03G017000	PRGDB00073406	38.1	105	61	3	635	324	71	172	1.9e-09	63.5	Os.98049	Putative_R-Genes,_predicted_from_NCBI_UniGene	Oryza sativa Japonica Group	RLP	116012748	AK243383	Oryza sativa Japonica Group cDNA, clone: J100063E02, full insert sequence
Ghir_A03G017020	PRGDB00215095	28.9	560	344	13	722	2395	21	528	7.5e-52	205.7	MDP0000319352	Putative_R-Genes,_predicted_from_Pythozome	Malus x domestica	TNL
Ghir_A03G017070	PRGDB00173473	33	97	64	1	874	1164	713	808	3.5e-08	60.8	ppa001518m	Putative_R-Genes,_predicted_from_Pythozome	Prunus persica	CN			U-box domain-containing protein kinase family protein (best arabidopsis hit)
Ghir_A03G017270	PRGDB00070731	41.3	121	69	1	263	625	1	119	2.8e-17	90.5	Mdo.689	Putative_R-Genes,_predicted_from_NCBI_UniGene	Malus x domestica	T	292668962	GU732467	Malus x domestica AP2 domain class transcription factor (AP2D43) mRNA, complete cds
Ghir_A03G017490	PRGDB00217007	66.7	153	50	1	568	1023	93	245	9.6e-52	204.5	MDP0000579910	Putative_R-Genes,_predicted_from_Pythozome	Malus x domestica	RLP
Ghir_A03G017520	PRGDB00070731	59.6	57	23	0	756	926	26	82	2.3e-13	77	Mdo.689	Putative_R-Genes,_predicted_from_NCBI_UniGene	Malus x domestica	T	292668962	GU732467	Malus x domestica AP2 domain class transcription factor (AP2D43) mRNA, complete cds
Ghir_A03G017590	PRGDB00200844	50.5	424	172	8	713	1924	52	457	8.5e-112	404.4	Bra008427	Putative_R-Genes,_predicted_from_Pythozome	Brassica rapa	RLP
Ghir_A03G017630	PRGDB00152308	65.6	807	262	7	398	2785	1	802	2.3e-290	998	orange1.1g003704m	Putative_R-Genes,_predicted_from_Pythozome	Citrus sinensis	RLP			STRUBBELIG-receptor family 3 (best arabidopsis hit)
Ghir_A03G017630.4	PRGDB00152308	65.6	807	262	7	546	2933	1	802	2.5e-290	998	orange1.1g003704m	Putative_R-Genes,_predicted_from_Pythozome	Citrus sinensis	RLP			STRUBBELIG-receptor family 3 (best arabidopsis hit)
Ghir_A03G017900.2	PRGWK00000861	47.2	704	322	16	348	2414	4	672	1.1e-150	533.9	Solyc07g053180.1.1	Contributed_R-Genes	Solanum lycopersicum	L
Ghir_A03G018150.1	PRGDB00154239	76.7	1443	304	7	243	4481	1	1441	0	2137.1	orange1.1g000533m	Putative_R-Genes,_predicted_from_Pythozome	Citrus sinensis	N			mitogen-activated protein kinase kinase kinase 7 (best arabidopsis hit)
Ghir_A03G018690	PRGDB00195495	34	100	65	1	2489	2785	1319	1418	5.8e-06	53.1	Phvulv091018313m	Putative_R-Genes,_predicted_from_Pythozome	Phaseolus vulgaris	TNL
Ghir_A03G018820	PRGDB00214610	62.4	263	99	0	989	1777	149	411	6.4e-92	338.6	MDP0000288298	Putative_R-Genes,_predicted_from_Pythozome	Malus x domestica	TNL
Ghir_A03G018860	PRGDB00181635	35	140	77	4	272	652	4	142	4.8e-17	88.6	Si025833m	Putative_R-Genes,_predicted_from_Pythozome	Setaria italica	NL			NAC domain containing protein 90 (best arabidopsis hit); NBS-LRR disease resistance protein, putative, expressed (best rice hit)
Ghir_A03G018950	PRGDB00188193	92.7	616	38	1	1	1827	5	620	0	1129	Ghi.14515	Putative_R-Genes,_predicted_from_NCBI_UniGene	Gossypium hirsutum	RLP	333952413	JF800909	Gossypium hirsutum cultivar Restoring line Y18 somatic embryogenesis receptor-like kinase 3 protein (serk3) mRNA, complete cds
Ghir_A03G018950.1	PRGDB00177866	82.5	473	76	3	779	2194	145	611	2.7e-219	761.5	30153.m000744	Putative_R-Genes,_predicted_from_Pythozome	Oryza barthii	RLP			BRI1-associated receptor kinase (best arabidopsis hit)
Ghir_A03G019190	PRGDB00189864	51.6	122	59	0	403	768	1040	1161	2.7e-30	134.4	Hv.35067	Putative_R-Genes,_predicted_from_NCBI_UniGene	Hordeum vulgare	NL	326524336	AK369350	Hordeum vulgare subsp. vulgare mRNA for predicted protein, complete cds, clone: NIASHv2089K17
Ghir_A03G019190.1	PRGDB00189864	51.9	108	52	0	403	726	1040	1147	7.7e-27	123.2	Hv.35067	Putative_R-Genes,_predicted_from_NCBI_UniGene	Hordeum vulgare	NL	326524336	AK369350	Hordeum vulgare subsp. vulgare mRNA for predicted protein, complete cds, clone: NIASHv2089K17
Ghir_A03G019240	PRGDB00213421	33.9	254	142	7	677	1378	104	351	1.7e-30	134	MDP0000280399	Putative_R-Genes,_predicted_from_Pythozome	Malus x domestica	RLP
Ghir_A03G019240.1	PRGDB00213421	33.9	254	142	7	197	898	104	351	1.3e-30	134	MDP0000280399	Putative_R-Genes,_predicted_from_Pythozome	Malus x domestica	RLP
Ghir_A03G020020	PRGDB00202169	25.6	121	85	2	197	547	16	135	5.4e-07	55.1	Bra007015	Putative_R-Genes,_predicted_from_Pythozome	Brassica rapa	RLP
Ghir_A03G020190	PRGDB00189838	53	336	147	6	346	1335	1243	1573	2.8e-93	342.8	Hv.34616	Putative_R-Genes,_predicted_from_NCBI_UniGene	Hordeum vulgare	NL	326530114	AK377143	Hordeum vulgare subsp. vulgare mRNA for predicted protein, partial cds, clone: NIASHv3149K09
Ghir_A03G020190.2	PRGDB00189838	59.3	135	54	1	1286	1690	1440	1573	9.4e-40	165.2	Hv.34616	Putative_R-Genes,_predicted_from_NCBI_UniGene	Hordeum vulgare	NL	326530114	AK377143	Hordeum vulgare subsp. vulgare mRNA for predicted protein, partial cds, clone: NIASHv3149K09
Ghir_A03G020430	PRGDB00211657	54.5	44	20	0	294	425	674	717	2.5e-06	53.5	Eucgr.H02157.1	Putative_R-Genes,_predicted_from_Pythozome	Eucalyptus grandis	TNL
Ghir_A03G020660	PRGDB00079067	34.9	421	246	9	288	1502	919	1327	1.5e-55	217.2	Vvi.24747	Putative_R-Genes,_predicted_from_NCBI_UniGene	Vitis vinifera	NL	225424433	XM_002281516	PREDICTED: Vitis vinifera hypothetical protein LOC100249092 (LOC100249092), mRNA
Ghir_A03G020730	PRGDB00070731	45.1	82	38	1	415	660	8	82	1.2e-11	71.2	Mdo.689	Putative_R-Genes,_predicted_from_NCBI_UniGene	Malus x domestica	T	292668962	GU732467	Malus x domestica AP2 domain class transcription factor (AP2D43) mRNA, complete cds
Ghir_A03G021030	PRGDB00214786	26.8	157	105	4	982	1437	710	861	3.7e-08	60.1	MDP0000257606	Putative_R-Genes,_predicted_from_Pythozome	Malus x domestica	NL
Ghir_A03G021310	PRGDB00150522	57	831	322	4	822	3212	30	859	4.5e-258	891	evm.model.supercontig_62.155	Putative_R-Genes,_predicted_from_Pythozome	Arabidopsis lyrata subsp. lyrata	RLP			Leucine-rich repeat protein kinase family protein (best arabidopsis hit)
Ghir_A03G021470.1	PRGDB00201975	59.1	88	35	1	2146	1883	288	374	2.4e-21	104	Bra036845	Putative_R-Genes,_predicted_from_Pythozome	Brassica rapa	CNL
Ghir_A03G022200	PRGDB00213092	50.2	225	107	2	263	922	52	276	5e-63	241.9	MDP0000278380	Putative_R-Genes,_predicted_from_Pythozome	Malus x domestica	Other
Ghir_A03G022260	PRGDB00211657	64.4	45	16	0	320	454	670	714	3.6e-12	72.4	Eucgr.H02157.1	Putative_R-Genes,_predicted_from_Pythozome	Eucalyptus grandis	TNL
Ghir_A03G022370	PRGDB00189838	60.4	331	122	3	806	1795	1251	1573	8.8e-111	401	Hv.34616	Putative_R-Genes,_predicted_from_NCBI_UniGene	Hordeum vulgare	NL	326530114	AK377143	Hordeum vulgare subsp. vulgare mRNA for predicted protein, partial cds, clone: NIASHv3149K09
Ghir_A03G022370.1	PRGDB00189838	60.4	331	122	3	634	1623	1251	1573	8.1e-111	401	Hv.34616	Putative_R-Genes,_predicted_from_NCBI_UniGene	Hordeum vulgare	NL	326530114	AK377143	Hordeum vulgare subsp. vulgare mRNA for predicted protein, partial cds, clone: NIASHv3149K09
Ghir_A03G022560	PRGDB00204912	30.2	944	514	25	301	2808	13	919	6.3e-109	395.2	Lus10017408	Putative_R-Genes,_predicted_from_Pythozome	Linum usitatissimum	CN
Ghir_A03G022560.1	PRGDB00204912	31.5	944	530	24	360	2951	13	919	1.3e-119	431	Lus10017408	Putative_R-Genes,_predicted_from_Pythozome	Linum usitatissimum	CN
Ghir_A03G022610	PRGDB00181635	40	170	86	5	254	718	13	181	3.2e-26	119.4	Si025833m	Putative_R-Genes,_predicted_from_Pythozome	Setaria italica	NL			NAC domain containing protein 90 (best arabidopsis hit); NBS-LRR disease resistance protein, putative, expressed (best rice hit)
Ghir_A03G022690.1	PRGDB00191296	40.7	285	168	1	1567	2421	236	519	1.9e-51	204.1	Lsa.44031	Putative_R-Genes,_predicted_from_NCBI_UniGene	Lactuca sativa	N	329679120	JI581626	TSA: Lactuca sativa CLC_LTR_V1A_17001 mRNA sequence
Ghir_A03G023320	PRGDB00176431	76.3	957	225	2	466	3336	26	980	0	1469.1	29765.m000745	Putative_R-Genes,_predicted_from_Pythozome	Oryza barthii	RLP			Leucine-rich receptor-like protein kinase family protein (best arabidopsis hit)
Ghir_A03G023630	PRGDB00177292	70.7	968	258	6	88	2949	34	989	0	1350.1	POPTR_0001s12420.1	Putative_R-Genes,_predicted_from_Pythozome	Populus trichocarpa	RLP			Leucine-rich receptor-like protein kinase family protein (best arabidopsis hit)
Ghir_A03G023660.1	PRGDB00078883	47.6	84	44	0	1238	1489	320	403	3.5e-18	92.8	Vvi.16557	Putative_R-Genes,_predicted_from_NCBI_UniGene	Vitis vinifera	RLP	225441697	XM_002277255	PREDICTED: Vitis vinifera hypothetical protein LOC100262317 (LOC100262317), mRNA
Ghir_A03G023820	PRGDB00216316	26.2	298	203	6	207	1088	69	353	1.9e-21	103.6	MDP0000248430	Putative_R-Genes,_predicted_from_Pythozome	Malus x domestica	N
Ghir_A04G000230	PRGDB00146508	44.4	126	63	2	71	427	1181	1306	1.6e-24	112.8	Bradi2g36190.3	Putative_R-Genes,_predicted_from_Pythozome	Ricinus communis	CNL			NB-ARC domain-containing disease resistance protein (best arabidopsis hit); NBS-LRR disease resistance protein, putative, expressed (best rice hit)
Ghir_A04G000240	PRGDB00213184	70.4	135	38	1	602	1006	1	133	1.2e-47	190.7	MDP0000285888	Putative_R-Genes,_predicted_from_Pythozome	Malus x domestica	CNL
Ghir_A04G000240.1	PRGDB00213184	70.4	135	38	1	456	860	1	133	1e-47	190.7	MDP0000285888	Putative_R-Genes,_predicted_from_Pythozome	Malus x domestica	CNL
Ghir_A04G000480	PRGDB00216779	48.3	58	30	0	2510	2683	1103	1160	4.3e-07	57.4	MDP0000600203	Putative_R-Genes,_predicted_from_Pythozome	Malus x domestica	RLP
Ghir_A04G000520	PRGDB00173031	71.5	1065	298	2	210	3392	30	1092	0	1524.6	ppa000573m	Putative_R-Genes,_predicted_from_Pythozome	Prunus persica	RLP			Leucine-rich receptor-like protein kinase family protein (best arabidopsis hit)
Ghir_A04G000560	PRGDB00201388	17.8	208	152	4	971	1576	1516	1710	2.3	34.7	Bra004192	Putative_R-Genes,_predicted_from_Pythozome	Brassica rapa	CNL
Ghir_A04G000570	PRGDB00215446	67.1	210	60	2	1539	2147	352	559	1.4e-75	284.3	MDP0000264975	Putative_R-Genes,_predicted_from_Pythozome	Malus x domestica	TNL
Ghir_A04G000570.1	PRGDB00215446	67.1	210	60	2	2269	2877	352	559	1.8e-75	284.3	MDP0000264975	Putative_R-Genes,_predicted_from_Pythozome	Malus x domestica	TNL
Ghir_A04G000650.1	PRGDB00175219	52.3	193	72	1	328	906	3	175	1.4e-50	200.3	POPTR_0003s08250.1	Putative_R-Genes,_predicted_from_Pythozome	Populus trichocarpa	TNL			transmembrane receptors;ATP binding (best arabidopsis hit)
Ghir_A04G000880	PRGDB00161715	44.4	858	449	13	292	2835	1	840	1.2e-183	643.7	cassava4.1_001587m	Putative_R-Genes,_predicted_from_Pythozome	Vitis aestivalis	CNL			NB-ARC domain-containing disease resistance protein (best arabidopsis hit)
Ghir_A04G001160	PRGDB00070731	55.4	74	33	0	479	700	19	92	9.9e-16	85.1	Mdo.689	Putative_R-Genes,_predicted_from_NCBI_UniGene	Malus x domestica	T	292668962	GU732467	Malus x domestica AP2 domain class transcription factor (AP2D43) mRNA, complete cds
Ghir_A04G001180	PRGDB00187911	40.6	315	179	5	150	1079	889	1200	2.5e-68	259.2	Ta.74193	Putative_R-Genes,_predicted_from_NCBI_UniGene	Triticum aestivum	RLP	241988090	AK335347	Triticum aestivum cDNA, clone: WT012_K21, cultivar: Chinese Spring
Ghir_A04G001240.1	PRGDB00187911	41.8	79	45	1	2116	1880	1117	1194	6.6e-13	75.9	Ta.74193	Putative_R-Genes,_predicted_from_NCBI_UniGene	Triticum aestivum	RLP	241988090	AK335347	Triticum aestivum cDNA, clone: WT012_K21, cultivar: Chinese Spring
Ghir_A04G002080	PRGDB00177436	39.5	215	113	5	157	777	1228	1433	2.5e-31	135.6	POPTR_0001s45120.1	Putative_R-Genes,_predicted_from_Pythozome	Populus trichocarpa	NL			NB-ARC domain-containing disease resistance protein (best arabidopsis hit)
Ghir_A04G002100.1	PRGDB00160447	31.8	110	73	1	313	636	5	114	4.5e-12	73.2	cassava4.1_022100m	Putative_R-Genes,_predicted_from_Pythozome	Vitis aestivalis	CNL			NB-ARC domain-containing disease resistance protein (best arabidopsis hit)
Ghir_A04G002790	PRGDB00149962	43.4	76	41	1	2961	3188	894	967	4.7e-10	67	clementine0.9_033891m	Putative_R-Genes,_predicted_from_Pythozome	Citrus clementina	CNL			NB-ARC domain-containing disease resistance protein (best arabidopsis hit)
Ghir_A04G002790.1	PRGDB00175440	44	75	39	2	1026	1247	1111	1183	1.9e-09	63.9	POPTR_0019s03700.1	Putative_R-Genes,_predicted_from_Pythozome	Populus trichocarpa	NL			NB-ARC domain-containing disease resistance protein (best arabidopsis hit)
Ghir_A04G002820	PRGDB00167217	51.1	45	21	1	2597	2463	991	1034	5.5e-06	53.1	mgv1a020513m	Putative_R-Genes,_predicted_from_Pythozome	Cucumis x hytivus	CNL			NB-ARC domain-containing disease resistance protein (best arabidopsis hit)
Ghir_A04G002820.4	PRGDB00167217	51.1	45	21	1	1592	1458	991	1034	3.5e-06	53.1	mgv1a020513m	Putative_R-Genes,_predicted_from_Pythozome	Cucumis x hytivus	CNL			NB-ARC domain-containing disease resistance protein (best arabidopsis hit)
Ghir_A04G002850	PRGDB00177091	38.2	144	75	3	55	447	240	382	1.1e-20	100.5	POPTR_0818s00195.1	Putative_R-Genes,_predicted_from_Pythozome	Populus trichocarpa	T			NAC domain containing protein 17 (best arabidopsis hit)
Ghir_A04G002850.1	PRGDB00177091	46.1	128	67	2	152	532	240	366	3.3e-26	119.8	POPTR_0818s00195.1	Putative_R-Genes,_predicted_from_Pythozome	Populus trichocarpa	T			NAC domain containing protein 17 (best arabidopsis hit)
Ghir_A04G003030	PRGDB00199494	30.3	142	82	6	268	651	640	778	1.5e-06	53.9	Pavirv00029442m	Putative_R-Genes,_predicted_from_Pythozome	Panicum virgatum	NL
Ghir_A04G003190.1	PRGDB00184523	48.6	109	46	1	1770	1444	977	1075	5.7e-22	105.9	GSVIVT01037631001	Putative_R-Genes,_predicted_from_Pythozome	Vitis vinifera	CNL			NB-ARC domain-containing disease resistance protein (best arabidopsis hit)
Ghir_A04G003260	PRGDB00149954	35.7	975	553	23	591	3350	16	971	5.5e-137	488.8	clementine0.9_001471m	Putative_R-Genes,_predicted_from_Pythozome	Citrus clementina	CNL			NB-ARC domain-containing disease resistance protein (best arabidopsis hit)
Ghir_A04G003450	PRGDB00214355	30.1	173	95	6	899	1405	755	905	4.8e-09	62.8	MDP0000310183	Putative_R-Genes,_predicted_from_Pythozome	Malus x domestica	CNL
Ghir_A04G003630	PRGDB00070731	64.4	59	21	0	129	305	23	81	4.7e-15	81.6	Mdo.689	Putative_R-Genes,_predicted_from_NCBI_UniGene	Malus x domestica	T	292668962	GU732467	Malus x domestica AP2 domain class transcription factor (AP2D43) mRNA, complete cds
Ghir_A04G003800	PRGDB00178409	33.8	1501	819	36	40	4167	10	1461	3.9e-192	672.2	POPTR_0134s00210.1	Putative_R-Genes,_predicted_from_Pythozome	Populus trichocarpa	CNL			NB-ARC domain-containing disease resistance protein (best arabidopsis hit)
Ghir_A04G003820	PRGDB00177506	42.4	184	99	2	85	618	1195	1377	6.2e-29	127.5	POPTR_0001s42440.1	Putative_R-Genes,_predicted_from_Pythozome	Populus trichocarpa	CNL			NB-ARC domain-containing disease resistance protein (best arabidopsis hit)
Ghir_A04G003830.1	PRGDB00178409	43.2	44	25	0	25	156	1340	1383	0.25	37.7	POPTR_0134s00210.1	Putative_R-Genes,_predicted_from_Pythozome	Populus trichocarpa	CNL			NB-ARC domain-containing disease resistance protein (best arabidopsis hit)
Ghir_A04G003840.1	PRGDB00062306	35.2	54	33	1	4218	4379	971	1022	16	32.7	Disease resistance protein RGA2, putative	Putative_R-Genes,_collected_from_NCBI_Protein	Ricinus communis	NL	223537753	EQ973904	Ricinus communis genomic scaffold scf_1106159297868, whole genome shotgun sequence.
Ghir_A04G004370	PRGDB00201186	72.4	105	28	1	339	653	1	104	3.3e-40	165.2	Bra039669	Putative_R-Genes,_predicted_from_Pythozome	Brassica rapa	N
Ghir_A04G004520	PRGDB00157600	64.3	1009	351	7	436	3441	3	1009	0	1262.7	orange1.1g001768m	Putative_R-Genes,_predicted_from_Pythozome	Citrus sinensis	RLP			Leucine-rich repeat transmembrane protein kinase (best arabidopsis hit)
Ghir_A04G004740.1	PRGDB00162702	41.3	1386	722	32	78	4178	25	1337	4.7e-265	914.4	cassava4.1_032094m	Putative_R-Genes,_predicted_from_Pythozome	Vitis aestivalis	NL			LRR and NB-ARC domains-containing disease resistance protein (best arabidopsis hit)
Ghir_A04G005290	PRGDB00215055	39.5	76	35	3	172	396	784	849	1e-06	53.1	MDP0000248164	Putative_R-Genes,_predicted_from_Pythozome	Malus x domestica	NL
Ghir_A04G005590	PRGDB00206399	65.4	431	145	2	207	1496	485	912	2.8e-164	578.6	Lus10012284	Putative_R-Genes,_predicted_from_Pythozome	Linum usitatissimum	N
Ghir_A04G005690	PRGDB00217252	56.1	82	36	0	433	678	683	764	9.6e-23	109	MDP0000284128	Putative_R-Genes,_predicted_from_Pythozome	Malus x domestica	RLP
Ghir_A04G006030	PRGDB00189838	55.3	318	140	2	541	1488	1258	1575	3.6e-97	355.5	Hv.34616	Putative_R-Genes,_predicted_from_NCBI_UniGene	Hordeum vulgare	NL	326530114	AK377143	Hordeum vulgare subsp. vulgare mRNA for predicted protein, partial cds, clone: NIASHv3149K09
Ghir_A04G006100	PRGDB00216650	57	316	129	4	1059	2000	935	1245	2.5e-103	376.3	MDP0000252094	Putative_R-Genes,_predicted_from_Pythozome	Malus x domestica	RLP
Ghir_A04G006360	PRGDB00079067	31	416	254	13	165	1355	937	1338	1.6e-39	163.7	Vvi.24747	Putative_R-Genes,_predicted_from_NCBI_UniGene	Vitis vinifera	NL	225424433	XM_002281516	PREDICTED: Vitis vinifera hypothetical protein LOC100249092 (LOC100249092), mRNA
Ghir_A04G006440	PRGDB00181635	42.3	253	115	7	239	943	11	250	8.6e-44	177.6	Si025833m	Putative_R-Genes,_predicted_from_Pythozome	Setaria italica	NL			NAC domain containing protein 90 (best arabidopsis hit); NBS-LRR disease resistance protein, putative, expressed (best rice hit)
Ghir_A04G006610	PRGDB00189344	48	123	57	4	449	802	1149	1269	1.6e-20	100.9	Hv.10056	Putative_R-Genes,_predicted_from_NCBI_UniGene	Hordeum vulgare	NL	326521753	AK369251	Hordeum vulgare subsp. vulgare mRNA for predicted protein, complete cds, clone: NIASHv2087M16
Ghir_A04G006670	PRGDB00216033	63.2	185	60	2	2352	2894	1	181	2.9e-62	240.4	MDP0000314577	Putative_R-Genes,_predicted_from_Pythozome	Malus x domestica	RLP
Ghir_A04G007780	PRGDB00186478	52.7	182	86	0	5394	4849	168	349	1.2e-51	206.5		Putative_R-Genes,_collected_from_NCBI_Protein	Medicago truncatula	TNL	357499226	XM_003619854	Medicago truncatula Disease resistance protein (MTR_6g071550) mRNA, complete cds.
Ghir_A04G007830	PRGDB00191790	51.9	183	87	1	579	1127	298	479	1e-60	235.3	Lsa.51071	Putative_R-Genes,_predicted_from_NCBI_UniGene	Lactuca sativa	N	329678974	JI581480	TSA: Lactuca sativa Letassy_X1_20535 mRNA sequence
Ghir_A04G008340	PRGDB00214478	44.2	285	100	10	532	1212	281	564	2.3e-46	186.4	MDP0000208730	Putative_R-Genes,_predicted_from_Pythozome	Malus x domestica	Mlo-like
Ghir_A04G008560	PRGDB00189838	55.2	326	137	3	935	1909	1251	1568	1.7e-96	353.6	Hv.34616	Putative_R-Genes,_predicted_from_NCBI_UniGene	Hordeum vulgare	NL	326530114	AK377143	Hordeum vulgare subsp. vulgare mRNA for predicted protein, partial cds, clone: NIASHv3149K09
Ghir_A04G008940	PRGDB00177064	35.6	149	78	6	311	736	296	433	4.3e-18	92	29912.m005281	Putative_R-Genes,_predicted_from_Pythozome	Oryza barthii	N			Flavin-binding monooxygenase family protein (best arabidopsis hit)
Ghir_A04G009190	PRGDB00207410	54.8	935	371	5	132	2936	501	1383	2.6e-276	951.4	Aquca_009_00902.1	Putative_R-Genes,_predicted_from_Pythozome	Aquilegia coerulea	RLP
Ghir_A04G009200	PRGDB00207410	40	512	271	11	255	1763	21	505	1e-91	337.4	Aquca_009_00902.1	Putative_R-Genes,_predicted_from_Pythozome	Aquilegia coerulea	RLP
Ghir_A04G009570	PRGDB00180392	46	409	159	15	108	1181	696	1093	9.4e-80	297.4	Si039656m	Putative_R-Genes,_predicted_from_Pythozome	Setaria italica	N			white-brown complex homolog protein 11 (best arabidopsis hit); white-brown complex homolog protein 11, putative, expressed (best rice hit)
Ghir_A04G009620	PRGDB00214816	69.7	76	20	2	1265	1492	1	73	1.1e-20	102.1	MDP0000171887	Putative_R-Genes,_predicted_from_Pythozome	Malus x domestica	CNL
Ghir_A04G009760	PRGWK00001761	59.8	92	32	2	1706	1969	1	91	4.6e-20	99.8	Sotub06g009190.1.1	Contributed_R-Genes	Solanum tuberosum	RLK
Ghir_A04G009760.1	PRGWK00001761	59.8	92	32	2	1971	2234	1	91	5.1e-20	99.8	Sotub06g009190.1.1	Contributed_R-Genes	Solanum tuberosum	RLK
Ghir_A04G010460	PRGDB00215267	40.1	287	162	6	243	1079	265	549	6.5e-49	194.9	MDP0000256952	Putative_R-Genes,_predicted_from_Pythozome	Malus x domestica	RLP
Ghir_A04G010770.1	PRGDB00217533	68.6	140	44	0	4336	4755	30	169	1.8e-51	206.8	Thhalv10011182m	Putative_R-Genes,_predicted_from_Pythozome	Eutrema halophilum	CN
Ghir_A04G010910	PRGDB00177091	49.2	128	58	5	503	874	240	364	1.7e-21	104.4	POPTR_0818s00195.1	Putative_R-Genes,_predicted_from_Pythozome	Populus trichocarpa	T			NAC domain containing protein 17 (best arabidopsis hit)
Ghir_A04G010920	PRGDB00070731	44.3	79	44	0	556	792	26	104	9.4e-13	74.7	Mdo.689	Putative_R-Genes,_predicted_from_NCBI_UniGene	Malus x domestica	T	292668962	GU732467	Malus x domestica AP2 domain class transcription factor (AP2D43) mRNA, complete cds
Ghir_A04G011040	PRGDB00213421	31.6	190	116	4	468	1013	131	314	2.2e-19	97.1	MDP0000280399	Putative_R-Genes,_predicted_from_Pythozome	Malus x domestica	RLP
Ghir_A04G011300	PRGDB00200844	47.4	424	193	6	531	1766	52	457	6.1e-104	378.3	Bra008427	Putative_R-Genes,_predicted_from_Pythozome	Brassica rapa	RLP
Ghir_A04G011460	PRGDB00211657	64.4	45	16	0	220	354	670	714	1.1e-11	70.9	Eucgr.H02157.1	Putative_R-Genes,_predicted_from_Pythozome	Eucalyptus grandis	TNL
Ghir_A04G012280.1	PRGDB00217252	34.1	135	71	4	77	448	631	758	5.4e-11	69.3	MDP0000284128	Putative_R-Genes,_predicted_from_Pythozome	Malus x domestica	RLP
Ghir_A04G012320	PRGDB00213421	35.1	225	128	5	698	1336	131	349	4.8e-30	132.5	MDP0000280399	Putative_R-Genes,_predicted_from_Pythozome	Malus x domestica	RLP
Ghir_A04G012410	PRGDB00078682	50.6	79	39	0	583	819	773	851	1.1e-17	91.7	Vvi.8276	Putative_R-Genes,_predicted_from_NCBI_UniGene	Vitis vinifera	NL	225452519	XM_002275052	PREDICTED: Vitis vinifera hypothetical protein LOC100250803 (LOC100250803), mRNA
Ghir_A04G012800	PRGDB00143781	77.1	35	8	0	956	1060	169	203	9.7e-08	58.5	356572	Putative_R-Genes,_predicted_from_Pythozome	Arabidopsis lyrata	T			Disease resistance protein (TIR-NBS-LRR class) family (best arabidopsis hit)
Ghir_A04G012980	PRGDB00211657	48.9	47	24	0	304	444	673	719	4.9e-06	52	Eucgr.H02157.1	Putative_R-Genes,_predicted_from_Pythozome	Eucalyptus grandis	TNL
Ghir_A04G013080	PRGDB00077825	28.9	304	203	7	535	1413	1197	1498	1.5e-26	120.9	Ta.43524	Putative_R-Genes,_predicted_from_NCBI_UniGene	Triticum aestivum	CNL	241987454	AK334711	Triticum aestivum cDNA, clone: WT010_M17, cultivar: Chinese Spring
Ghir_A04G013260	PRGDB00214085	61.1	90	35	0	757	1026	249	338	3e-25	117.1	MDP0000194411	Putative_R-Genes,_predicted_from_Pythozome	Malus x domestica	N
Ghir_A04G013690	PRGDB00189838	55.6	360	143	6	491	1567	1230	1573	2.2e-99	362.8	Hv.34616	Putative_R-Genes,_predicted_from_NCBI_UniGene	Hordeum vulgare	NL	326530114	AK377143	Hordeum vulgare subsp. vulgare mRNA for predicted protein, partial cds, clone: NIASHv3149K09
Ghir_A04G014110.2	PRGDB00216650	28.3	357	191	12	3054	4085	940	1244	1.1e-31	139.4	MDP0000252094	Putative_R-Genes,_predicted_from_Pythozome	Malus x domestica	RLP
Ghir_A04G014120	PRGDB00216650	28.3	357	191	12	446	1477	940	1244	4.9e-32	139.4	MDP0000252094	Putative_R-Genes,_predicted_from_Pythozome	Malus x domestica	RLP
Ghir_A04G014120.1	PRGDB00216650	34.2	73	46	2	173	391	940	1010	9.2e-06	52	MDP0000252094	Putative_R-Genes,_predicted_from_Pythozome	Malus x domestica	RLP
Ghir_A04G014210	PRGDB00147571	57.5	179	75	1	889	1422	911	1089	2.5e-52	208	clementine0.9_000952m	Putative_R-Genes,_predicted_from_Pythozome	Citrus clementina	RLP			Leucine-rich repeat protein kinase family protein (best arabidopsis hit)
Ghir_A04G014210.1	PRGDB00147571	57.5	179	75	1	889	1422	911	1089	2.5e-52	208	clementine0.9_000952m	Putative_R-Genes,_predicted_from_Pythozome	Citrus clementina	RLP			Leucine-rich repeat protein kinase family protein (best arabidopsis hit)
Ghir_A04G015040	PRGDB00189912	27.8	187	123	4	918	1445	197	382	3.9e-15	83.2	Hv.36068	Putative_R-Genes,_predicted_from_NCBI_UniGene	Hordeum vulgare	N	326508777	AK364708	Hordeum vulgare subsp. vulgare mRNA for predicted protein, complete cds, clone: NIASHv2027L24
Ghir_A04G015660	PRGDB00214002	67.8	597	185	3	947	2716	51	647	7.1e-228	790.4	MDP0000277070	Putative_R-Genes,_predicted_from_Pythozome	Malus x domestica	RLP
Ghir_A04G015730	PRGDB00213057	23.7	177	134	1	1080	1610	1086	1261	4.2e-07	56.6	MDP0000278168	Putative_R-Genes,_predicted_from_Pythozome	Malus x domestica	TNL
Ghir_A04G015940	PRGDB00050757	47.8	67	32	1	291	491	200	263	9.1e-10	63.5	R 11	Putative_R-Genes,_collected_from_NCBI_Protein	Glycine max	T	27764534	AF541963	Glycine max cv Williams 82 BAC clone Gm_ISb001_091_F11, complete sequence.
Ghir_A04G016280	PRGDB00201800	46	265	86	6	768	1538	1136	1351	4e-49	196.1	Bra001162	Putative_R-Genes,_predicted_from_Pythozome	Brassica rapa	TNL
Ghir_A05G000450	PRGDB00200674	31.1	164	102	6	1291	1761	15	174	3.4e-07	57.4	Bra005271	Putative_R-Genes,_predicted_from_Pythozome	Brassica rapa	CNL
Ghir_A05G000810	PRGDB00215267	25.8	132	77	2	387	740	17	141	3.9e-07	55.8	MDP0000256952	Putative_R-Genes,_predicted_from_Pythozome	Malus x domestica	RLP
Ghir_A05G000830	PRGDB00148286	73.1	624	166	2	441	2312	21	642	1.7e-256	885.6	clementine0.9_004747m	Putative_R-Genes,_predicted_from_Pythozome	Citrus clementina	RLP			Leucine-rich repeat protein kinase family protein (best arabidopsis hit)
Ghir_A05G000980	PRGDB00189664	53.1	64	25	3	219	401	630	691	1.9e-09	65.1	Hv.31767	Putative_R-Genes,_predicted_from_NCBI_UniGene	Hordeum vulgare	NL	326501247	AK367652	Hordeum vulgare subsp. vulgare mRNA for predicted protein, complete cds, clone: NIASHv2059P21
Ghir_A05G001120	PRGDB00217072	53.7	287	121	4	828	1679	1177	1454	3e-78	292.7	MDP0000261726	Putative_R-Genes,_predicted_from_Pythozome	Malus x domestica	RLP
Ghir_A05G001130	PRGDB00078682	46.3	54	28	1	1411	1569	795	848	3.6e-07	56.6	Vvi.8276	Putative_R-Genes,_predicted_from_NCBI_UniGene	Vitis vinifera	NL	225452519	XM_002275052	PREDICTED: Vitis vinifera hypothetical protein LOC100250803 (LOC100250803), mRNA
Ghir_A05G001130.2	PRGDB00078682	46.3	54	28	1	1576	1734	795	848	3.9e-07	56.6	Vvi.8276	Putative_R-Genes,_predicted_from_NCBI_UniGene	Vitis vinifera	NL	225452519	XM_002275052	PREDICTED: Vitis vinifera hypothetical protein LOC100250803 (LOC100250803), mRNA
Ghir_A05G001300	PRGDB00213421	58.1	186	75	1	2240	1683	197	379	1.6e-52	207.6	MDP0000280399	Putative_R-Genes,_predicted_from_Pythozome	Malus x domestica	RLP
Ghir_A05G001300.1	PRGDB00213421	58.1	186	75	1	2541	1984	197	379	1.8e-52	207.6	MDP0000280399	Putative_R-Genes,_predicted_from_Pythozome	Malus x domestica	RLP
Ghir_A05G001650	PRGDB00073072	48.6	599	293	3	801	2555	61	658	1.5e-151	537	Os.80143	Putative_R-Genes,_predicted_from_NCBI_UniGene	Oryza sativa Japonica Group	CNL	32975074	AK065056	Oryza sativa Japonica Group cDNA clone:J013001J06, full insert sequence
Ghir_A05G001690	PRGDB00070731	30.9	162	100	3	585	1049	25	181	2e-07	57	Mdo.689	Putative_R-Genes,_predicted_from_NCBI_UniGene	Malus x domestica	T	292668962	GU732467	Malus x domestica AP2 domain class transcription factor (AP2D43) mRNA, complete cds
Ghir_A05G001730	PRGDB00078525	49	261	126	3	131	907	14	269	2.3e-67	256.1	Vvi.774	Putative_R-Genes,_predicted_from_NCBI_UniGene	Vitis vinifera	RLP	225469427	XM_002267128	PREDICTED: Vitis vinifera hypothetical protein LOC100251471 (LOC100251471), mRNA
Ghir_A05G001900	PRGDB00215446	50.3	183	78	3	970	1515	353	523	4.5e-44	179.1	MDP0000264975	Putative_R-Genes,_predicted_from_Pythozome	Malus x domestica	TNL
Ghir_A05G002090	PRGDB00214554	81.9	343	55	2	482	1489	666	1008	5.8e-156	550.8	MDP0000322399	Putative_R-Genes,_predicted_from_Pythozome	Malus x domestica	NL
Ghir_A05G002150	PRGDB00183352	67.3	801	262	0	305	2707	1127	1927	0	1116.3	GSVIVT01015461001	Putative_R-Genes,_predicted_from_Pythozome	Vitis vinifera	N			pleiotropic drug resistance 12 (best arabidopsis hit)
Ghir_A05G002160	PRGDB00149841	76.1	616	145	2	378	2225	24	637	4.8e-263	907.1	evm.model.supercontig_23.170	Putative_R-Genes,_predicted_from_Pythozome	Arabidopsis lyrata subsp. lyrata	RLP			Leucine-rich repeat protein kinase family protein (best arabidopsis hit)
Ghir_A05G002170	PRGDB00163458	81.4	1421	262	2	259	4518	1	1420	0	2364	cassava4.1_000260m	Putative_R-Genes,_predicted_from_Pythozome	Vitis aestivalis	N			pleiotropic drug resistance 4 (best arabidopsis hit)
Ghir_A05G002180	PRGDB00189912	23.1	364	244	10	1105	2109	197	553	3.8e-22	106.7	Hv.36068	Putative_R-Genes,_predicted_from_NCBI_UniGene	Hordeum vulgare	N	326508777	AK364708	Hordeum vulgare subsp. vulgare mRNA for predicted protein, complete cds, clone: NIASHv2027L24
Ghir_A05G002350	PRGDB00202169	33.5	194	93	2	254	727	17	210	9.8e-25	114.4	Bra007015	Putative_R-Genes,_predicted_from_Pythozome	Brassica rapa	RLP
Ghir_A05G002570	PRGDB00079067	43.6	78	43	1	559	792	933	1009	7.9e-11	69.7	Vvi.24747	Putative_R-Genes,_predicted_from_NCBI_UniGene	Vitis vinifera	NL	225424433	XM_002281516	PREDICTED: Vitis vinifera hypothetical protein LOC100249092 (LOC100249092), mRNA
Ghir_A05G002570.1	PRGDB00079067	43.6	78	43	1	559	792	933	1009	7.6e-11	69.7	Vvi.24747	Putative_R-Genes,_predicted_from_NCBI_UniGene	Vitis vinifera	NL	225424433	XM_002281516	PREDICTED: Vitis vinifera hypothetical protein LOC100249092 (LOC100249092), mRNA
Ghir_A05G002940	PRGDB00201252	70	20	6	0	3382	3441	1081	1100	1.2	35.8	Bra018936	Putative_R-Genes,_predicted_from_Pythozome	Brassica rapa	RLP
Ghir_A05G002940.1	PRGDB00201252	70	20	6	0	4024	4083	1081	1100	1.4	35.8	Bra018936	Putative_R-Genes,_predicted_from_Pythozome	Brassica rapa	RLP
Ghir_A05G003040	PRGDB00198784	36.1	83	51	1	915	1157	750	832	2e-09	63.9	Pavirv00056058m	Putative_R-Genes,_predicted_from_Pythozome	Panicum virgatum	NL
Ghir_A05G003220	PRGDB00177072	54.9	882	372	6	1	2583	1	877	4.9e-270	930.2	29912.m005378	Putative_R-Genes,_predicted_from_Pythozome	Oryza barthii	NL			NB-ARC domain-containing disease resistance protein (best arabidopsis hit)
Ghir_A05G003480	PRGDB00182795	42.7	150	82	2	343	780	1098	1247	9.5e-28	124.4	GSVIVT01000058001	Putative_R-Genes,_predicted_from_Pythozome	Vitis vinifera	RLP			Leucine-rich repeat protein kinase family protein (best arabidopsis hit)
Ghir_A05G003480.1	PRGDB00182795	42.1	76	42	1	343	564	1098	1173	5.5e-09	60.8	GSVIVT01000058001	Putative_R-Genes,_predicted_from_Pythozome	Vitis vinifera	RLP			Leucine-rich repeat protein kinase family protein (best arabidopsis hit)
Ghir_A05G003600	PRGDB00079040	45.9	133	59	4	443	802	8	140	6.6e-20	99	Vvi.23988	Putative_R-Genes,_predicted_from_NCBI_UniGene	Vitis vinifera	RLP	225442062	XM_002272327	PREDICTED: Vitis vinifera hypothetical protein LOC100260039 (LOC100260039), mRNA
Ghir_A05G003620	PRGDB00070731	32.9	82	52	1	149	385	25	106	9.3e-07	54.7	Mdo.689	Putative_R-Genes,_predicted_from_NCBI_UniGene	Malus x domestica	T	292668962	GU732467	Malus x domestica AP2 domain class transcription factor (AP2D43) mRNA, complete cds
Ghir_A05G003730	PRGWK00000139	19.3	269	159	8	2494	3300	1289	1499	0.32	38.5	MELO3C009074	Contributed_R-Genes	Cucumis melo	RLK
Ghir_A05G003740	PRGDB00192324	61.2	165	47	3	2272	2760	1124	1273	3.9e-49	196.8	Mtr.12478	Putative_R-Genes,_predicted_from_NCBI_UniGene	Medicago truncatula	TNL	357500090	XM_003620286	Medicago truncatula Sucrose synthase (MTR_6g081120) mRNA, complete cds
Ghir_A05G003880	PRGDB00183040	39.1	69	22	1	558	764	604	652	9.2e-07	54.7	GSVIVT01007793001	Putative_R-Genes,_predicted_from_Pythozome	Vitis vinifera	NL			RING/U-box superfamily protein (best arabidopsis hit)
Ghir_A05G004490	PRGDB00075417	55.4	177	59	1	413	943	15	171	1.1e-48	194.1	Pth.16040	Putative_R-Genes,_predicted_from_NCBI_UniGene	Populus trichocarpa	TNL	105923234	DQ513251	Populus trichocarpa clone 806367 TIR-NBS-LRR type disease resistance protein mRNA, complete cds
Ghir_A05G004530.1	PRGDB00215191	57.7	454	180	7	355	1692	695	1144	2.6e-140	499.2	MDP0000254848	Putative_R-Genes,_predicted_from_Pythozome	Malus x domestica	RLK-GNK2
Ghir_A05G004580.1	PRGDB00215142	38.9	350	190	8	140	1141	674	1015	7.7e-63	241.1	MDP0000277457	Putative_R-Genes,_predicted_from_Pythozome	Malus x domestica	RLP
Ghir_A05G004750	PRGDB00152417	63.1	738	268	1	944	3145	284	1021	3e-275	948	orange1.1g001706m	Putative_R-Genes,_predicted_from_Pythozome	Citrus sinensis	RLP			Protein kinase family protein with leucine-rich repeat domain (best arabidopsis hit)
Ghir_A05G004830	PRGDB00174886	63.9	751	257	5	297	2528	33	776	4.3e-271	934.1	POPTR_0006s25380.1	Putative_R-Genes,_predicted_from_Pythozome	Populus trichocarpa	RLP			Leucine-rich receptor-like protein kinase family protein (best arabidopsis hit)
Ghir_A05G004860	PRGDB00156657	58.7	63	26	0	902	1090	222	284	3e-14	79.7	Glyma03g23250.1	Putative_R-Genes,_predicted_from_Pythozome	Glycine max	T			GATA transcription factor 2 (best arabidopsis hit)
Ghir_A05G004900	PRGWK00001242	27.8	241	123	8	135	833	8	205	3.4e-12	73.2	Sotub01g037760.1.1	Contributed_R-Genes	Solanum tuberosum	RLP
Ghir_A05G004940	PRGDB00070731	55.2	67	29	1	1022	1219	26	92	4.2e-13	76.3	Mdo.689	Putative_R-Genes,_predicted_from_NCBI_UniGene	Malus x domestica	T	292668962	GU732467	Malus x domestica AP2 domain class transcription factor (AP2D43) mRNA, complete cds
Ghir_A05G005010	PRGDB00216535	58.5	106	40	2	854	1171	71	172	1.4e-23	111.7	MDP0000279752	Putative_R-Genes,_predicted_from_Pythozome	Malus x domestica	N
Ghir_A05G005010.1	PRGDB00216535	58.5	106	40	2	892	1209	71	172	1.4e-23	111.7	MDP0000279752	Putative_R-Genes,_predicted_from_Pythozome	Malus x domestica	N
Ghir_A05G005040	PRGDB00211657	48.9	47	24	0	879	1019	673	719	2.3e-07	58.2	Eucgr.H02157.1	Putative_R-Genes,_predicted_from_Pythozome	Eucalyptus grandis	TNL
Ghir_A05G005470.1	PRGDB00216981	67.5	412	97	4	261	1445	33	424	2.6e-154	546.2	MDP0000297928	Putative_R-Genes,_predicted_from_Pythozome	Malus x domestica	RLP
Ghir_A05G005480	PRGDB00149250	74.7	839	210	2	713	3223	17	855	0	1253.4	evm.model.supercontig_1348.2	Putative_R-Genes,_predicted_from_Pythozome	Arabidopsis lyrata subsp. lyrata	RLP			Leucine-rich repeat protein kinase family protein (best arabidopsis hit)
Ghir_A05G005610	PRGDB00073072	44.1	653	344	6	955	2862	10	658	1.6e-147	523.9	Os.80143	Putative_R-Genes,_predicted_from_NCBI_UniGene	Oryza sativa Japonica Group	CNL	32975074	AK065056	Oryza sativa Japonica Group cDNA clone:J013001J06, full insert sequence
Ghir_A05G005900	PRGDB00076724	26.3	133	89	3	305	703	136	259	5.3e-07	56.6	Sbi.21101	Putative_R-Genes,_predicted_from_NCBI_UniGene	Sorghum bicolor	CN	242094787	XM_002437839	Sorghum bicolor hypothetical protein, mRNA
Ghir_A05G005980	PRGDB00070731	38.5	65	40	0	77	271	18	82	2.4e-06	54.3	Mdo.689	Putative_R-Genes,_predicted_from_NCBI_UniGene	Malus x domestica	T	292668962	GU732467	Malus x domestica AP2 domain class transcription factor (AP2D43) mRNA, complete cds
Ghir_A05G006060	PRGDB00191296	35.1	222	132	6	640	1299	266	477	2.6e-20	100.5	Lsa.44031	Putative_R-Genes,_predicted_from_NCBI_UniGene	Lactuca sativa	N	329679120	JI581626	TSA: Lactuca sativa CLC_LTR_V1A_17001 mRNA sequence
Ghir_A05G006430.1	PRGDB00078970	37.5	275	147	2	743	1558	1109	1361	5.3e-46	186.8	Vvi.20745	Putative_R-Genes,_predicted_from_NCBI_UniGene	Vitis vinifera	CNL	225447515	XM_002268092	PREDICTED: Vitis vinifera hypothetical protein LOC100252764 (LOC100252764), mRNA
Ghir_A05G006610	PRGDB00189831	26.5	234	152	8	919	1602	1236	1455	7.6e-12	72.8	Hv.34567	Putative_R-Genes,_predicted_from_NCBI_UniGene	Hordeum vulgare	NL	326530731	AK369963	Hordeum vulgare subsp. vulgare mRNA for predicted protein, complete cds, clone: NIASHv2102D06
Ghir_A05G006740	PRGDB00078970	35.7	42	27	0	1621	1746	1488	1529	40	30.8	Vvi.20745	Putative_R-Genes,_predicted_from_NCBI_UniGene	Vitis vinifera	CNL	225447515	XM_002268092	PREDICTED: Vitis vinifera hypothetical protein LOC100252764 (LOC100252764), mRNA
Ghir_A05G006740.1	PRGDB00078970	35.7	42	27	0	1717	1842	1488	1529	41	30.8	Vvi.20745	Putative_R-Genes,_predicted_from_NCBI_UniGene	Vitis vinifera	CNL	225447515	XM_002268092	PREDICTED: Vitis vinifera hypothetical protein LOC100252764 (LOC100252764), mRNA
Ghir_A05G006800	PRGDB00078970	32.6	291	174	4	744	1598	1076	1350	5.6e-33	143.3	Vvi.20745	Putative_R-Genes,_predicted_from_NCBI_UniGene	Vitis vinifera	CNL	225447515	XM_002268092	PREDICTED: Vitis vinifera hypothetical protein LOC100252764 (LOC100252764), mRNA
Ghir_A05G006810	PRGDB00144037	41.7	60	35	0	164	343	9	68	1.3e-06	53.5	930274	Putative_R-Genes,_predicted_from_Pythozome	Arabidopsis lyrata	T			Leucine-rich repeat (LRR) family protein (best arabidopsis hit)
Ghir_A05G007130	PRGDB00062347	32.3	251	150	6	540	1250	15	259	2.2e-25	117.1	E3 ligase	Putative_R-Genes,_collected_from_NCBI_Protein	Oryza sativa Japonica Group	N	324029072	HQ123582	Oryza sativa Japonica Group cultivar Taipei 309 E3 ligase (BBI1) gene, complete cds.
Ghir_A05G007320	PRGDB00170967	36	139	70	3	1529	1888	657	795	3.4e-15	84	LOC_Os07g14820.1	Putative_R-Genes,_predicted_from_Pythozome	Oryza sativa	RLP			Leucine-rich repeat protein kinase family protein (best arabidopsis hit)
Ghir_A05G007320.1	PRGDB00170967	36	139	70	3	1603	1962	657	795	3.5e-15	84	LOC_Os07g14820.1	Putative_R-Genes,_predicted_from_Pythozome	Oryza sativa	RLP			Leucine-rich repeat protein kinase family protein (best arabidopsis hit)
Ghir_A05G007550	PRGDB00176268	32.6	89	57	1	160	417	339	427	5.4e-07	55.5	29656.m000483	Putative_R-Genes,_predicted_from_Pythozome	Oryza barthii	Mlo-like			Seven transmembrane MLO family protein (best arabidopsis hit)
Ghir_A05G007710	PRGDB00150031	67.2	524	149	10	93	1610	1	519	1.1e-194	679.5	clementine0.9_006901m	Putative_R-Genes,_predicted_from_Pythozome	Citrus clementina	Mlo-like			Seven transmembrane MLO family protein (best arabidopsis hit)
Ghir_A05G007800	PRGDB00184503	58.4	221	75	6	1	651	988	1195	2.9e-57	221.5	GSVIVT01037444001	Putative_R-Genes,_predicted_from_Pythozome	Vitis vinifera	CNL			NB-ARC domain-containing disease resistance protein (best arabidopsis hit)
Ghir_A05G007880	PRGDB00217736	43.3	164	74	2	276	710	167	330	5.5e-28	125.6	Thhalv10027748m	Putative_R-Genes,_predicted_from_Pythozome	Eutrema halophilum	TNL
Ghir_A05G007930	PRGDB00186755	55.9	59	26	0	542	718	1134	1192	1.3e-10	68.2		Putative_R-Genes,_collected_from_NCBI_Protein	Vitis vinifera	CNL	359494547	XM_003634755	PREDICTED: Vitis vinifera putative disease resistance protein RGA3-like (LOC100852663), mRNA.
Ghir_A05G007950.1	PRGDB00077826	46.7	242	117	5	1992	2702	42	276	4.5e-52	206.8	Ta.43882	Putative_R-Genes,_predicted_from_NCBI_UniGene	Triticum aestivum	CN	241984818	AK332078	Triticum aestivum cDNA, clone: WT003_B12, cultivar: Chinese Spring
Ghir_A05G008090	PRGDB00079067	37.3	110	67	1	1018	1341	1217	1326	1.8e-10	67.4	Vvi.24747	Putative_R-Genes,_predicted_from_NCBI_UniGene	Vitis vinifera	NL	225424433	XM_002281516	PREDICTED: Vitis vinifera hypothetical protein LOC100249092 (LOC100249092), mRNA
Ghir_A05G008640	PRGDB00070731	54.3	70	32	0	276	485	26	95	6.1e-12	71.6	Mdo.689	Putative_R-Genes,_predicted_from_NCBI_UniGene	Malus x domestica	T	292668962	GU732467	Malus x domestica AP2 domain class transcription factor (AP2D43) mRNA, complete cds
Ghir_A05G008970	PRGDB00203730	38.6	101	52	2	851	1141	716	810	3.3e-09	64.3	Carubv10028126m	Putative_R-Genes,_predicted_from_Pythozome	Capsella rubella	CN
Ghir_A05G009130	PRGDB00149042	56.3	1037	433	10	243	3326	7	1032	0	1078.5	evm.model.supercontig_112.36	Putative_R-Genes,_predicted_from_Pythozome	Arabidopsis lyrata subsp. lyrata	RLP			Leucine-rich repeat protein kinase family protein (best arabidopsis hit)
Ghir_A05G009180	PRGDB00182255	37.4	182	82	3	1050	1595	1520	1669	1.3e-20	102.1	441722	Putative_R-Genes,_predicted_from_Pythozome	Selaginella moellendorffii	N			pleiotropic drug resistance 12 (best arabidopsis hit)
Ghir_A05G009180.3	PRGDB00182255	37.4	182	82	3	1210	1755	1520	1669	1.5e-20	102.1	441722	Putative_R-Genes,_predicted_from_Pythozome	Selaginella moellendorffii	N			pleiotropic drug resistance 12 (best arabidopsis hit)
Ghir_A05G009270	PRGDB00214816	43.8	80	29	1	1026	1217	1	80	1.2e-07	58.5	MDP0000171887	Putative_R-Genes,_predicted_from_Pythozome	Malus x domestica	CNL
Ghir_A05G009320	PRGDB00184271	89.4	47	4	1	478	618	662	707	3.8e-17	89.7	GRMZM2G162531_T01	Putative_R-Genes,_predicted_from_Pythozome	Zea mays	RLP			STRUBBELIG-receptor family 8 (best arabidopsis hit); STRUBBELIG-RECEPTOR FAMILY 7 precursor, putative, expressed (best rice hit)
Ghir_A05G009440	PRGDB00215267	45.5	253	131	4	501	1241	298	549	2.5e-58	226.5	MDP0000256952	Putative_R-Genes,_predicted_from_Pythozome	Malus x domestica	RLP
Ghir_A05G009640	PRGDB00182255	37.3	185	84	2	1320	1874	1517	1669	7.4e-26	119.4	441722	Putative_R-Genes,_predicted_from_Pythozome	Selaginella moellendorffii	N			pleiotropic drug resistance 12 (best arabidopsis hit)
Ghir_A05G009820	PRGDB00049789	56.6	288	88	6	892	1647	2	288	3.9e-79	295.8	putative RING zinc finger ankyrin protein	Putative_R-Genes,_collected_from_NCBI_Protein	Sorghum bicolor	N	190688725	EU810765	Sorghum bicolor clone BAC Sbb12448, complete sequence.
Ghir_A05G009840	PRGDB00191296	63.4	287	104	1	1290	2147	237	523	3.1e-95	349.7	Lsa.44031	Putative_R-Genes,_predicted_from_NCBI_UniGene	Lactuca sativa	N	329679120	JI581626	TSA: Lactuca sativa CLC_LTR_V1A_17001 mRNA sequence
Ghir_A05G009840.1	PRGDB00191296	63.4	287	104	1	2733	3590	237	523	4.7e-95	349.7	Lsa.44031	Putative_R-Genes,_predicted_from_NCBI_UniGene	Lactuca sativa	N	329679120	JI581626	TSA: Lactuca sativa CLC_LTR_V1A_17001 mRNA sequence
Ghir_A05G009880	PRGDB00167710	82.4	393	67	1	301	1479	878	1268	6.4e-179	627.5	Medtr2g047020.1	Putative_R-Genes,_predicted_from_Pythozome	Medicago truncatula	TNL			heat shock cognate protein 70-1 (best arabidopsis hit)
Ghir_A05G009890	PRGDB00213092	39.9	223	128	5	179	841	58	276	6.7e-43	174.9	MDP0000278380	Putative_R-Genes,_predicted_from_Pythozome	Malus x domestica	Other
Ghir_A05G009950	PRGDB00202169	67.8	236	41	1	220	822	15	250	3.5e-79	295	Bra007015	Putative_R-Genes,_predicted_from_Pythozome	Brassica rapa	RLP
Ghir_A05G010010	PRGDB00204808	71	107	30	1	201	521	1639	1744	3.5e-33	141.7	GRMZM2G060054_T03	Putative_R-Genes,_predicted_from_Pythozome	Zea mays	CNL
Ghir_A05G010010.1	PRGDB00204808	69.8	96	28	1	201	488	1639	1733	2.5e-27	122.9	GRMZM2G060054_T03	Putative_R-Genes,_predicted_from_Pythozome	Zea mays	CNL
Ghir_A05G010350	PRGDB00155209	67.8	1020	327	1	805	3864	5	1023	0	1359.4	orange1.1g001700m	Putative_R-Genes,_predicted_from_Pythozome	Citrus sinensis	RLP			Leucine-rich repeat protein kinase family protein (best arabidopsis hit)
Ghir_A05G010390	PRGDB00180714	44.3	70	38	1	560	769	620	688	7.6e-06	51.6	Si013150m	Putative_R-Genes,_predicted_from_Pythozome	Setaria italica	RLP			PEP1 receptor 1 (best arabidopsis hit); receptor-like protein kinase precursor, putative, expressed (best rice hit)
Ghir_A05G010630	PRGDB00156657	62.1	58	22	0	1846	2019	227	284	1.4e-14	81.6	Glyma03g23250.1	Putative_R-Genes,_predicted_from_Pythozome	Glycine max	T			GATA transcription factor 2 (best arabidopsis hit)
Ghir_A05G010890	PRGDB00152889	79.9	720	144	1	488	2647	1	719	0	1156.4	orange1.1g004929m	Putative_R-Genes,_predicted_from_Pythozome	Citrus sinensis	N			ABC-2 type transporter family protein (best arabidopsis hit)
Ghir_A05G011340	PRGDB00201406	52.6	114	52	2	471	806	1145	1258	1.9e-25	116.7	Bra003867	Putative_R-Genes,_predicted_from_Pythozome	Brassica rapa	TNL
Ghir_A05G011510	PRGDB00179296	53.9	128	54	2	586	963	867	991	2.5e-32	139.8	Sb05g008160.1	Putative_R-Genes,_predicted_from_Pythozome	Sorghum bicolor	NL			MAP kinase kinase 5 (best arabidopsis hit); resistance protein, putative, expressed (best rice hit)
Ghir_A05G011910	PRGDB00067067	58.9	319	124	4	392	1333	120	436	2.9e-104	379	At.74913	Putative_R-Genes,_predicted_from_NCBI_UniGene	Arabidopsis thaliana	RLP	222138216	FJ154118	Arabidopsis thaliana At3g13062 mRNA, complete cds
Ghir_A05G012360	PRGDB00201227	51.6	626	286	5	262	2091	981	1605	8.6e-176	617.1	Bra026094	Putative_R-Genes,_predicted_from_Pythozome	Brassica rapa	CNL
Ghir_A05G012420	PRGDB00070731	43.1	58	33	0	103	276	25	82	2.7e-07	55.8	Mdo.689	Putative_R-Genes,_predicted_from_NCBI_UniGene	Malus x domestica	T	292668962	GU732467	Malus x domestica AP2 domain class transcription factor (AP2D43) mRNA, complete cds
Ghir_A05G012460	PRGDB00073072	27.8	176	111	8	319	810	467	638	0.00035	46.2	Os.80143	Putative_R-Genes,_predicted_from_NCBI_UniGene	Oryza sativa Japonica Group	CNL	32975074	AK065056	Oryza sativa Japonica Group cDNA clone:J013001J06, full insert sequence
Ghir_A05G012570	PRGDB00063797	32.8	119	71	4	810	1139	225	343	3.2e-07	57.4	hypothetical protein	Putative_R-Genes,_collected_from_NCBI_Protein	Sorghum bicolor	T	242047787	XM_002461595	Sorghum bicolor hypothetical protein, mRNA.
Ghir_A05G012710	PRGDB00177643	71.4	1432	395	5	484	4776	32	1450	0	2073.1	POPTR_0001s14650.1	Putative_R-Genes,_predicted_from_Pythozome	Populus trichocarpa	CN			pleiotropic drug resistance 12 (best arabidopsis hit)
Ghir_A05G012720	PRGDB00165878	71.2	1443	391	7	85	4404	19	1439	0	2099.3	cassava4.1_027677m	Putative_R-Genes,_predicted_from_Pythozome	Vitis aestivalis	N			pleiotropic drug resistance 12 (best arabidopsis hit)
Ghir_A05G012720.1	PRGDB00175116	69.3	896	247	4	1963	4581	591	1481	0	1278.8	POPTR_0003s17740.1	Putative_R-Genes,_predicted_from_Pythozome	Populus trichocarpa	N			pleiotropic drug resistance 1 (best arabidopsis hit)
Ghir_A05G012730	PRGDB00163444	71.5	1469	387	6	352	4755	1	1439	0	2146.3	cassava4.1_033021m	Putative_R-Genes,_predicted_from_Pythozome	Vitis aestivalis	N			pleiotropic drug resistance 12 (best arabidopsis hit)
Ghir_A05G012870	PRGDB00183463	59.4	96	31	2	1358	1074	810	898	8.9e-18	91.7	GSVIVT01017267001	Putative_R-Genes,_predicted_from_Pythozome	Vitis vinifera	NL			LRR and NB-ARC domains-containing disease resistance protein (best arabidopsis hit)
Ghir_A05G013520	PRGDB00070731	50	76	37	1	282	506	17	92	1.1e-13	77.4	Mdo.689	Putative_R-Genes,_predicted_from_NCBI_UniGene	Malus x domestica	T	292668962	GU732467	Malus x domestica AP2 domain class transcription factor (AP2D43) mRNA, complete cds
Ghir_A05G013830	PRGDB00215191	53.4	545	202	8	501	2003	690	1226	2.4e-153	542.7	MDP0000254848	Putative_R-Genes,_predicted_from_Pythozome	Malus x domestica	RLK-GNK2
Ghir_A05G014010	PRGDB00203535	73	767	206	1	250	2550	381	1146	0	1140.9	Carubv10019685m	Putative_R-Genes,_predicted_from_Pythozome	Capsella rubella	CN
Ghir_A05G014210	PRGDB00143462	34.4	93	58	2	2006	2275	1719	1811	3.7e-06	53.9	493465	Putative_R-Genes,_predicted_from_Pythozome	Arabidopsis lyrata	TNL			Regulator of chromosome condensation (RCC1) family protein (best arabidopsis hit)
Ghir_A05G014360	PRGDB00079040	60.7	28	8	1	336	410	11	38	13	31.2	Vvi.23988	Putative_R-Genes,_predicted_from_NCBI_UniGene	Vitis vinifera	RLP	225442062	XM_002272327	PREDICTED: Vitis vinifera hypothetical protein LOC100260039 (LOC100260039), mRNA
Ghir_A05G014480	PRGDB00211657	68.9	45	14	0	710	844	670	714	1.3e-12	74.3	Eucgr.H02157.1	Putative_R-Genes,_predicted_from_Pythozome	Eucalyptus grandis	TNL
Ghir_A05G014550.1	PRGDB00217028	73.5	34	9	0	413	514	49	82	6.1e-08	58.5	MDP0000191680	Putative_R-Genes,_predicted_from_Pythozome	Malus x domestica	T
Ghir_A05G014630	PRGDB00078682	36.7	109	68	1	954	1277	780	888	5.5e-16	85.9	Vvi.8276	Putative_R-Genes,_predicted_from_NCBI_UniGene	Vitis vinifera	NL	225452519	XM_002275052	PREDICTED: Vitis vinifera hypothetical protein LOC100250803 (LOC100250803), mRNA
Ghir_A05G014640	PRGDB00215055	56.8	44	19	0	500	631	784	827	7.7e-10	65.5	MDP0000248164	Putative_R-Genes,_predicted_from_Pythozome	Malus x domestica	NL
Ghir_A05G014670.1	PRGDB00162920	79.6	416	80	3	1666	2913	306	716	8.2e-187	654.1	cassava4.1_002588m	Putative_R-Genes,_predicted_from_Pythozome	Vitis aestivalis	RLP			STRUBBELIG-receptor family 6 (best arabidopsis hit)
Ghir_A05G015550.1	PRGDB00218046	41.8	189	76	7	455	1018	333	488	1.5e-29	131.7	Thhalv10027276m	Putative_R-Genes,_predicted_from_Pythozome	Eutrema halophilum	TNL
Ghir_A05G015740	PRGDB00163358	65	984	324	10	160	3078	20	994	0	1239.9	cassava4.1_030745m	Putative_R-Genes,_predicted_from_Pythozome	Vitis aestivalis	RLP			receptor-like kinase in flowers 1 (best arabidopsis hit)
Ghir_A05G015840	PRGDB00047400	41.7	192	80	5	371	934	1050	1213	2.3e-30	133.3	TIR-NBS-TIR-TIR-WRKY type disease resistance protein	Putative_R-Genes,_collected_from_NCBI_Protein	Populus trichocarpa	TNL	105922709	DQ513218	Populus trichocarpa clone 196822 TIR-NBS-TIR-TIR-WRKY type disease resistance protein mRNA, complete cds.
Ghir_A05G015860	PRGDB00214478	37.5	120	61	3	558	887	445	560	7.1e-14	78.6	MDP0000208730	Putative_R-Genes,_predicted_from_Pythozome	Malus x domestica	Mlo-like
Ghir_A05G016270	PRGDB00070731	61.8	76	22	3	548	772	26	95	8.9e-17	87.8	Mdo.689	Putative_R-Genes,_predicted_from_NCBI_UniGene	Malus x domestica	T	292668962	GU732467	Malus x domestica AP2 domain class transcription factor (AP2D43) mRNA, complete cds
Ghir_A05G017060	PRGDB00170972	34.1	91	50	3	1419	1682	73	156	3.6e-06	54.7	LOC_Os07g17230.1	Putative_R-Genes,_predicted_from_Pythozome	Oryza sativa	NL			LRR and NB-ARC domains-containing disease resistance protein (best arabidopsis hit)
Ghir_A05G017160	PRGDB00190291	22.6	217	162	3	1212	1862	405	615	4.7e-07	56.6	Lsa.16797	Putative_R-Genes,_predicted_from_NCBI_UniGene	Lactuca sativa	N	329676902	JI579408	TSA: Lactuca sativa Letassy_X1_5504 mRNA sequence
Ghir_A05G017170	PRGDB00147146	47.3	184	93	2	922	1473	2	181	1.1e-43	177.6	Bradi4g14700.1	Putative_R-Genes,_predicted_from_Pythozome	Ricinus communis	NL			NB-ARC domain-containing disease resistance protein (best arabidopsis hit); disease resistance protein RPM1, putative (best rice hit)
Ghir_A05G017170.1	PRGDB00147146	47.3	184	93	2	2099	2650	2	181	2.2e-43	177.6	Bradi4g14700.1	Putative_R-Genes,_predicted_from_Pythozome	Ricinus communis	NL			NB-ARC domain-containing disease resistance protein (best arabidopsis hit); disease resistance protein RPM1, putative (best rice hit)
Ghir_A05G017290	PRGDB00202493	72.3	47	13	0	1329	1469	839	885	3.8e-12	73.6	Bra030622	Putative_R-Genes,_predicted_from_Pythozome	Brassica rapa	RLP
Ghir_A05G017350	PRGDB00146989	44.8	87	48	0	446	706	601	687	1.2e-15	84.3	Bradi3g58940.1	Putative_R-Genes,_predicted_from_Pythozome	Ricinus communis	NL			NB-ARC domain-containing disease resistance protein (best arabidopsis hit); RGH1A, putative, expressed (best rice hit)
Ghir_A05G017350.1	PRGDB00146989	35.9	145	92	1	130	564	544	687	2.7e-19	96.3	Bradi3g58940.1	Putative_R-Genes,_predicted_from_Pythozome	Ricinus communis	NL			NB-ARC domain-containing disease resistance protein (best arabidopsis hit); RGH1A, putative, expressed (best rice hit)
Ghir_A05G017590	PRGDB00206435	57.9	76	32	0	196	423	770	845	1.9e-17	88.6	Lus10015549	Putative_R-Genes,_predicted_from_Pythozome	Linum usitatissimum	RLP
Ghir_A05G017600	PRGDB00206435	61.1	108	41	1	367	687	770	877	9.2e-30	131	Lus10015549	Putative_R-Genes,_predicted_from_Pythozome	Linum usitatissimum	RLP
Ghir_A05G017830	PRGDB00184523	59.4	133	50	1	3337	2951	988	1120	2e-37	157.9	GSVIVT01037631001	Putative_R-Genes,_predicted_from_Pythozome	Vitis vinifera	CNL			NB-ARC domain-containing disease resistance protein (best arabidopsis hit)
Ghir_A05G017890	PRGDB00065333	62.5	56	20	1	899	1066	113	167	3.4e-11	70.1	Aan.68903	Putative_R-Genes,_predicted_from_NCBI_UniGene	Artemisia annua	RLK	259809559	EZ369767	TSA: Artemisia annua strain Uganda Contig3218.Ulm mRNA sequence
Ghir_A05G017930	PRGDB00191296	39.8	254	148	4	999	1751	279	530	1.2e-40	168.3	Lsa.44031	Putative_R-Genes,_predicted_from_NCBI_UniGene	Lactuca sativa	N	329679120	JI581626	TSA: Lactuca sativa CLC_LTR_V1A_17001 mRNA sequence
Ghir_A05G018100	PRGDB00202169	41.5	212	88	1	348	875	7	218	1.1e-39	164.1	Bra007015	Putative_R-Genes,_predicted_from_Pythozome	Brassica rapa	RLP
Ghir_A05G018180	PRGDB00177091	48.8	125	60	3	633	1004	240	361	5.3e-25	115.9	POPTR_0818s00195.1	Putative_R-Genes,_predicted_from_Pythozome	Populus trichocarpa	T			NAC domain containing protein 17 (best arabidopsis hit)
Ghir_A05G018180.1	PRGDB00177091	48.8	125	60	3	339	710	240	361	4.6e-25	115.9	POPTR_0818s00195.1	Putative_R-Genes,_predicted_from_Pythozome	Populus trichocarpa	T			NAC domain containing protein 17 (best arabidopsis hit)
Ghir_A05G018260	PRGDB00064617	60.7	61	24	0	646	828	54	114	5.6e-16	85.5	Zm.143017	Putative_R-Genes,_predicted_from_NCBI_UniGene	Zea mays	RLK	223973790	BT065207	Zea mays full-length cDNA clone ZM_BFb0035I10 mRNA, complete cds
Ghir_A05G018330	PRGDB00213363	68.2	85	26	1	2206	2460	1325	1408	5e-26	120.2	MDP0000265619	Putative_R-Genes,_predicted_from_Pythozome	Malus x domestica	N
Ghir_A05G018460	PRGDB00182255	38.5	182	81	3	760	1305	1519	1669	3.8e-25	116.7	441722	Putative_R-Genes,_predicted_from_Pythozome	Selaginella moellendorffii	N			pleiotropic drug resistance 12 (best arabidopsis hit)
Ghir_A05G018710	PRGDB00177064	45.3	53	29	0	569	727	380	432	9.5e-09	60.8	29912.m005281	Putative_R-Genes,_predicted_from_Pythozome	Oryza barthii	N			Flavin-binding monooxygenase family protein (best arabidopsis hit)
Ghir_A05G018980	PRGDB00202605	57.1	254	104	5	451	1200	10	262	7e-83	308.1	Carubv10019327m	Putative_R-Genes,_predicted_from_Pythozome	Capsella rubella	Other
Ghir_A05G019020	PRGDB00184271	89.4	47	4	1	530	670	662	707	2.8e-17	90.1	GRMZM2G162531_T01	Putative_R-Genes,_predicted_from_Pythozome	Zea mays	RLP			STRUBBELIG-receptor family 8 (best arabidopsis hit); STRUBBELIG-RECEPTOR FAMILY 7 precursor, putative, expressed (best rice hit)
Ghir_A05G019350	PRGDB00177734	36	111	69	2	277	603	298	408	1.1e-10	67	30138.m004038	Putative_R-Genes,_predicted_from_Pythozome	Oryza barthii	N			Protein kinase superfamily protein (best arabidopsis hit)
Ghir_A05G019500.1	PRGDB00147216	73.4	218	56	2	452	1099	712	929	1.2e-85	317.4	Bradi4g24910.1	Putative_R-Genes,_predicted_from_Pythozome	Ricinus communis	RLP			mitogen-activated protein kinase 1 (best arabidopsis hit); CGMC_MAPKCMGC_2_SLT2y_ERK.2 - CGMC includes CDA, MAPK, GSK3, and CLKC kinases, expressed (best rice hit)
Ghir_A05G020410	PRGDB00215095	32.9	559	320	10	119	1771	23	534	1.1e-77	290.8	MDP0000319352	Putative_R-Genes,_predicted_from_Pythozome	Malus x domestica	TNL
Ghir_A05G020450	PRGDB00161165	72.6	831	215	6	1412	3880	1	826	0	1189.5	cassava4.1_001747m	Putative_R-Genes,_predicted_from_Pythozome	Vitis aestivalis	RPW8-NL			ADR1-like 1 (best arabidopsis hit)
Ghir_A05G020450.1	PRGDB00161165	72	837	215	7	1412	3898	1	826	0	1182.9	cassava4.1_001747m	Putative_R-Genes,_predicted_from_Pythozome	Vitis aestivalis	RPW8-NL			ADR1-like 1 (best arabidopsis hit)
Ghir_A05G020480	PRGDB00211657	57.4	47	20	0	595	735	674	720	1.1e-07	58.2	Eucgr.H02157.1	Putative_R-Genes,_predicted_from_Pythozome	Eucalyptus grandis	TNL
Ghir_A05G020970	PRGDB00062347	38.7	93	55	2	2790	3065	163	254	1.3e-10	68.9	E3 ligase	Putative_R-Genes,_collected_from_NCBI_Protein	Oryza sativa Japonica Group	N	324029072	HQ123582	Oryza sativa Japonica Group cultivar Taipei 309 E3 ligase (BBI1) gene, complete cds.
Ghir_A05G021050	PRGDB00149156	68.7	630	190	4	661	2535	34	661	3.3e-244	844.7	clementine0.9_004363m	Putative_R-Genes,_predicted_from_Pythozome	Citrus clementina	RLP			Leucine-rich repeat protein kinase family protein (best arabidopsis hit)
Ghir_A05G021250	PRGDB00217072	54.3	322	126	2	285	1250	1154	1454	1.4e-93	343.6	MDP0000261726	Putative_R-Genes,_predicted_from_Pythozome	Malus x domestica	RLP
Ghir_A05G021480	PRGDB00191296	43.3	263	149	0	1042	1830	257	519	1.5e-49	197.6	Lsa.44031	Putative_R-Genes,_predicted_from_NCBI_UniGene	Lactuca sativa	N	329679120	JI581626	TSA: Lactuca sativa CLC_LTR_V1A_17001 mRNA sequence
Ghir_A05G021970	PRGDB00143781	77.1	35	8	0	985	1089	169	203	8.7e-08	58.5	356572	Putative_R-Genes,_predicted_from_Pythozome	Arabidopsis lyrata	T			Disease resistance protein (TIR-NBS-LRR class) family (best arabidopsis hit)
Ghir_A05G022000	PRGDB00178120	72.7	958	261	1	651	3521	26	983	0	1402.1	POPTR_0002s10700.1	Putative_R-Genes,_predicted_from_Pythozome	Populus trichocarpa	RLP			Leucine-rich receptor-like protein kinase family protein (best arabidopsis hit)
Ghir_A05G022060	PRGDB00062520	47.8	1259	587	19	283	3945	3	1229	4.5e-308	1057.4	nbs-lrr resistance protein	Putative_R-Genes,_collected_from_NCBI_Protein	Populus trichocarpa	NL	116047831	CM000347	Populus trichocarpa linkage group XI, whole genome shotgun sequence.
Ghir_A05G022280	PRGDB00206876	28.4	522	325	13	34	1485	1623	2133	5.7e-54	212.2	LOC_Os01g33260.1	Putative_R-Genes,_predicted_from_Pythozome	Oryza sativa	N
Ghir_A05G022300	PRGDB00216779	70.7	58	17	0	2266	2439	1103	1160	2.2e-15	84.7	MDP0000600203	Putative_R-Genes,_predicted_from_Pythozome	Malus x domestica	RLP
Ghir_A05G022400	PRGDB00188448	52.8	246	105	4	1477	2208	61	297	2e-62	241.1	Gma.19334	Putative_R-Genes,_predicted_from_NCBI_UniGene	Glycine max	NL	356567183	XM_003551753	PREDICTED: Glycine max probable disease resistance protein At4g27220-like (LOC100788065), mRNA
Ghir_A05G022650	PRGDB00171933	60	290	114	1	1362	2225	973	1262	3.8e-96	352.8	LOC_Os11g27450.1	Putative_R-Genes,_predicted_from_Pythozome	Oryza sativa	NL			RNI-like superfamily protein (best arabidopsis hit)
Ghir_A05G023050	PRGWK00000861	44.5	330	163	5	2067	3032	293	610	1.5e-64	248.1	Solyc07g053180.1.1	Contributed_R-Genes	Solanum lycopersicum	L
Ghir_A05G023080	PRGDB00213421	33.5	227	133	5	613	1257	131	351	1.4e-29	131	MDP0000280399	Putative_R-Genes,_predicted_from_Pythozome	Malus x domestica	RLP
Ghir_A05G023100	PRGDB00211657	60	55	22	0	355	519	670	724	1.1e-13	77.8	Eucgr.H02157.1	Putative_R-Genes,_predicted_from_Pythozome	Eucalyptus grandis	TNL
Ghir_A05G023120	PRGDB00216316	20.1	288	201	6	652	1506	95	356	2.8e-06	53.9	MDP0000248430	Putative_R-Genes,_predicted_from_Pythozome	Malus x domestica	N
Ghir_A05G023190	PRGDB00174306	50.5	1032	469	6	163	3132	29	1060	8e-281	966.5	ppa025153m	Putative_R-Genes,_predicted_from_Pythozome	Prunus persica	RLP			Leucine-rich repeat receptor-like protein kinase family protein (best arabidopsis hit)
Ghir_A05G023200	PRGDB00174306	49.3	1070	484	8	122	3166	24	1090	6e-281	966.8	ppa025153m	Putative_R-Genes,_predicted_from_Pythozome	Prunus persica	RLP			Leucine-rich repeat receptor-like protein kinase family protein (best arabidopsis hit)
Ghir_A05G023310	PRGDB00214485	50.6	468	143	9	547	1731	528	980	6.3e-112	404.8	MDP0000287433	Putative_R-Genes,_predicted_from_Pythozome	Malus x domestica	CN
Ghir_A05G023310.1	PRGDB00214485	56.3	359	96	5	727	1665	637	980	4e-103	375.6	MDP0000287433	Putative_R-Genes,_predicted_from_Pythozome	Malus x domestica	CN
Ghir_A05G023520	PRGDB00217252	33.1	169	106	3	1456	1956	1371	1534	1.5e-12	74.7	MDP0000284128	Putative_R-Genes,_predicted_from_Pythozome	Malus x domestica	RLP
Ghir_A05G023570	PRGDB00214085	52.3	111	49	2	553	876	229	338	2.5e-24	114	MDP0000194411	Putative_R-Genes,_predicted_from_Pythozome	Malus x domestica	N
Ghir_A05G023590.1	PRGDB00078883	37.3	263	159	3	3656	4435	170	429	1.7e-37	159.1	Vvi.16557	Putative_R-Genes,_predicted_from_NCBI_UniGene	Vitis vinifera	RLP	225441697	XM_002277255	PREDICTED: Vitis vinifera hypothetical protein LOC100262317 (LOC100262317), mRNA
Ghir_A05G023870	PRGDB00070731	32.9	73	49	0	911	1129	20	92	3.5e-07	56.6	Mdo.689	Putative_R-Genes,_predicted_from_NCBI_UniGene	Malus x domestica	T	292668962	GU732467	Malus x domestica AP2 domain class transcription factor (AP2D43) mRNA, complete cds
Ghir_A05G024050	PRGDB00169101	80.6	31	6	0	1362	1454	1268	1298	6.7e-07	55.8	LOC_Os02g04530.1	Putative_R-Genes,_predicted_from_Pythozome	Oryza sativa	CNL			LRR and NB-ARC domains-containing disease resistance protein (best arabidopsis hit)
Ghir_A05G024050.1	PRGDB00169101	80.6	31	6	0	1503	1595	1268	1298	6.1e-07	55.8	LOC_Os02g04530.1	Putative_R-Genes,_predicted_from_Pythozome	Oryza sativa	CNL			LRR and NB-ARC domains-containing disease resistance protein (best arabidopsis hit)
Ghir_A05G024060	PRGDB00167788	69.7	119	36	0	382	738	38	156	2.6e-44	179.9	Medtr2g121840.1	Putative_R-Genes,_predicted_from_Pythozome	Medicago truncatula	RLP			Leucine-rich repeat transmembrane protein kinase protein (best arabidopsis hit)
Ghir_A05G024180.1	PRGDB00191296	31.6	95	64	1	1823	2107	263	356	0.00021	49.3	Lsa.44031	Putative_R-Genes,_predicted_from_NCBI_UniGene	Lactuca sativa	N	329679120	JI581626	TSA: Lactuca sativa CLC_LTR_V1A_17001 mRNA sequence
Ghir_A05G024240	PRGDB00217072	52.7	256	119	1	800	1561	1200	1455	7.3e-73	275	MDP0000261726	Putative_R-Genes,_predicted_from_Pythozome	Malus x domestica	RLP
Ghir_A05G024270	PRGDB00192408	27.6	217	129	7	902	1537	1573	1766	4.8e-09	62.8	Mtr.17858	Putative_R-Genes,_predicted_from_NCBI_UniGene	Medicago truncatula	NL	357472002	XM_003606238	Medicago truncatula NBS resistance protein (MTR_4g055630) mRNA, complete cds
Ghir_A05G024390	PRGDB00181372	21.3	150	115	1	1543	1992	120	266	8.3e-06	52.8	Si005894m	Putative_R-Genes,_predicted_from_Pythozome	Setaria italica	CN			U-box domain-containing protein kinase family protein (best arabidopsis hit); protein kinase, putative, expressed (best rice hit)
Ghir_A05G024530	PRGDB00216535	53	330	111	11	586	1476	397	715	7e-75	281.2	MDP0000279752	Putative_R-Genes,_predicted_from_Pythozome	Malus x domestica	N
Ghir_A05G024530.1	PRGDB00216535	53	330	111	11	1027	1917	397	715	9e-75	281.2	MDP0000279752	Putative_R-Genes,_predicted_from_Pythozome	Malus x domestica	N
Ghir_A05G024660	PRGDB00199494	33.9	112	68	3	175	495	668	778	1.1e-09	63.2	Pavirv00029442m	Putative_R-Genes,_predicted_from_Pythozome	Panicum virgatum	NL
Ghir_A05G025000.1	PRGDB00216316	36.8	38	24	0	1161	1274	107	144	20	30.8	MDP0000248430	Putative_R-Genes,_predicted_from_Pythozome	Malus x domestica	N
Ghir_A05G025040	PRGDB00202169	41.5	123	68	1	449	817	15	133	5e-21	102.1	Bra007015	Putative_R-Genes,_predicted_from_Pythozome	Brassica rapa	RLP
Ghir_A05G025090	PRGDB00177091	67	109	33	2	413	736	268	374	8.3e-36	152.1	POPTR_0818s00195.1	Putative_R-Genes,_predicted_from_Pythozome	Populus trichocarpa	T			NAC domain containing protein 17 (best arabidopsis hit)
Ghir_A05G025240	PRGDB00186167	58.6	87	32	2	79	327	110	196	9.9e-17	89	AC152495.1_FGT003	Putative_R-Genes,_predicted_from_Pythozome	Zea mays	CNL			LRR and NB-ARC domains-containing disease resistance protein (best arabidopsis hit); rp1, putative, expressed (best rice hit)
Ghir_A05G025240.1	PRGDB00186167	58.6	87	32	2	858	1106	110	196	1.3e-16	89	AC152495.1_FGT003	Putative_R-Genes,_predicted_from_Pythozome	Zea mays	CNL			LRR and NB-ARC domains-containing disease resistance protein (best arabidopsis hit); rp1, putative, expressed (best rice hit)
Ghir_A05G025250	PRGDB00201252	42	81	47	0	452	694	849	929	2e-10	67.4	Bra018936	Putative_R-Genes,_predicted_from_Pythozome	Brassica rapa	RLP
Ghir_A05G025380	PRGDB00211657	56.4	55	24	0	541	705	670	724	7.2e-12	71.6	Eucgr.H02157.1	Putative_R-Genes,_predicted_from_Pythozome	Eucalyptus grandis	TNL
Ghir_A05G025570.1	PRGDB00161020	61.3	489	186	2	590	2053	14	500	5.5e-165	581.6	cassava4.1_001023m	Putative_R-Genes,_predicted_from_Pythozome	Vitis aestivalis	RLP			Leucine-rich receptor-like protein kinase family protein (best arabidopsis hit)
Ghir_A05G025830.1	PRGDB00192459	48.7	269	130	3	439	1224	210	477	5.9e-68	258.1	Mtr.22577	Putative_R-Genes,_predicted_from_NCBI_UniGene	Medicago truncatula	CNL	357509266	XM_003624874	Medicago truncatula NB-LRR type disease resistance protein (MTR_7g089080) mRNA, complete cds
Ghir_A05G025900	PRGDB00073619	75	44	11	0	952	1083	4	47	9.7e-12	71.2	Pgl.6264	Putative_R-Genes,_predicted_from_NCBI_UniGene	Picea glauca	T	211597751	GE477365	GQ0133.B3.r_M03 GQ013: Elongating ROOTS tips - saplings Picea glauca cDNA clone GQ0133_M03 5', mRNA sequence
Ghir_A05G026100	PRGDB00047070	29.7	74	45	2	196	405	1482	1552	0.51	36.2	disease resistance protein (TIR-NBS-LRR class), putative	Putative_R-Genes,_collected_from_NCBI_Protein	Arabidopsis thaliana	TNL	18414202	NM_117515	Arabidopsis thaliana disease resistance protein (TIR-NBS-LRR class), putative (AT4G14370) mRNA, complete cds.
Ghir_A05G026120	PRGDB00174250	66.1	1151	374	7	34	3462	65	1207	0	1472.2	POPTR_0005s25640.1	Putative_R-Genes,_predicted_from_Pythozome	Populus trichocarpa	RLP			Leucine-rich receptor-like protein kinase family protein (best arabidopsis hit)
Ghir_A05G026770	PRGDB00079067	48.5	66	34	0	792	989	940	1005	8e-11	68.9	Vvi.24747	Putative_R-Genes,_predicted_from_NCBI_UniGene	Vitis vinifera	NL	225424433	XM_002281516	PREDICTED: Vitis vinifera hypothetical protein LOC100249092 (LOC100249092), mRNA
Ghir_A05G026870	PRGDB00149414	71.5	964	264	7	236	3100	1	962	0	1360.1	evm.model.supercontig_160.7	Putative_R-Genes,_predicted_from_Pythozome	Arabidopsis lyrata subsp. lyrata	RLP			Leucine-rich repeat transmembrane protein kinase family protein (best arabidopsis hit)
Ghir_A05G026870.1	PRGDB00173996	72.3	736	194	5	831	3020	156	887	0	1058.5	ppa001184m	Putative_R-Genes,_predicted_from_Pythozome	Prunus persica	RLP			Leucine-rich repeat transmembrane protein kinase family protein (best arabidopsis hit)
Ghir_A05G027470	PRGDB00215386	44.5	335	147	10	957	1883	428	749	9.7e-56	218	MDP0000258186	Putative_R-Genes,_predicted_from_Pythozome	Malus x domestica	CNL
Ghir_A05G027580	PRGDB00192108	47.7	363	168	4	335	1423	1193	1533	1.8e-89	329.7	Lsa.52993	Putative_R-Genes,_predicted_from_NCBI_UniGene	Lactuca sativa	TNL	329671470	JI573976	TSA: Lactuca sativa Letassy_X1_17963 mRNA sequence
Ghir_A05G027810	PRGDB00175322	59.8	965	314	9	73	2778	25	978	0	1090.1	POPTR_0019s10720.3	Putative_R-Genes,_predicted_from_Pythozome	Populus trichocarpa	RLP			Leucine-rich receptor-like protein kinase family protein (best arabidopsis hit)
Ghir_A05G027810.1	PRGDB00175322	59.9	958	310	9	595	3279	25	971	0	1087.4	POPTR_0019s10720.3	Putative_R-Genes,_predicted_from_Pythozome	Populus trichocarpa	RLP			Leucine-rich receptor-like protein kinase family protein (best arabidopsis hit)
Ghir_A05G027860	PRGDB00215095	27.7	548	353	9	197	1825	18	527	2.7e-48	193.4	MDP0000319352	Putative_R-Genes,_predicted_from_Pythozome	Malus x domestica	TNL
Ghir_A05G027970	PRGDB00211657	66.7	45	15	0	720	854	670	714	3e-12	73.2	Eucgr.H02157.1	Putative_R-Genes,_predicted_from_Pythozome	Eucalyptus grandis	TNL
Ghir_A05G028220.1	PRGDB00213930	43.4	251	105	7	383	1060	1	239	1.9e-39	164.1	MDP0000283542	Putative_R-Genes,_predicted_from_Pythozome	Malus x domestica	CNL
Ghir_A05G028330	PRGDB00203751	42.1	133	62	5	585	944	1198	1328	1.8e-16	87	Carubv10025742m	Putative_R-Genes,_predicted_from_Pythozome	Capsella rubella	TNL
Ghir_A05G028670.1	PRGDB00201821	40.4	114	68	0	797	1138	954	1067	5e-18	92.8	Bra012540	Putative_R-Genes,_predicted_from_Pythozome	Brassica rapa	TNL
Ghir_A05G028740	PRGDB00217119	52.6	154	68	5	563	1018	102	252	3.6e-37	156	MDP0000320460	Putative_R-Genes,_predicted_from_Pythozome	Malus x domestica	RLP
Ghir_A05G028830	PRGDB00148393	42.6	1428	766	20	1	4164	1	1414	1.6e-289	995.7	clementine0.9_035928m	Putative_R-Genes,_predicted_from_Pythozome	Citrus clementina	CNL			NB-ARC domain-containing disease resistance protein (best arabidopsis hit)
Ghir_A05G028840	PRGDB00190291	31	290	177	11	19	870	356	628	2.9e-18	92.4	Lsa.16797	Putative_R-Genes,_predicted_from_NCBI_UniGene	Lactuca sativa	N	329676902	JI579408	TSA: Lactuca sativa Letassy_X1_5504 mRNA sequence
Ghir_A05G028960	PRGDB00187911	36.9	309	187	4	106	1014	896	1202	8.3e-56	217.6	Ta.74193	Putative_R-Genes,_predicted_from_NCBI_UniGene	Triticum aestivum	RLP	241988090	AK335347	Triticum aestivum cDNA, clone: WT012_K21, cultivar: Chinese Spring
Ghir_A05G029140.1	PRGDB00206399	58.1	415	157	1	299	1492	488	902	5.8e-138	490.7	Lus10012284	Putative_R-Genes,_predicted_from_Pythozome	Linum usitatissimum	N
Ghir_A05G029150	PRGDB00176384	27.9	233	151	6	247	942	94	310	7.6e-11	68.9	29738.m001021	Putative_R-Genes,_predicted_from_Pythozome	Oryza barthii	N			ABC-2 type transporter family protein (best arabidopsis hit)
Ghir_A05G029620.1	PRGDB00150495	52.8	1140	501	10	14	3334	1	1136	0	1099.3	evm.model.supercontig_596.1	Putative_R-Genes,_predicted_from_Pythozome	Arabidopsis lyrata subsp. lyrata	RLP			Leucine-rich repeat protein kinase family protein (best arabidopsis hit)
Ghir_A05G029630.1	PRGDB00165532	51.4	1036	430	13	91	3042	9	1023	1.1e-276	952.6	cassava4.1_023021m	Putative_R-Genes,_predicted_from_Pythozome	Vitis aestivalis	RLP			Leucine-rich repeat protein kinase family protein (best arabidopsis hit)
Ghir_A05G029770	PRGDB00215739	34.5	258	134	6	393	1118	20	258	6.2e-31	136.3	MDP0000180046	Putative_R-Genes,_predicted_from_Pythozome	Malus x domestica	TNL
Ghir_A05G029820	PRGDB00200918	22.9	170	112	5	1717	2172	588	756	0.0061	42.7	Bra023648	Putative_R-Genes,_predicted_from_Pythozome	Brassica rapa	TNL
Ghir_A05G030060.1	PRGDB00177608	42.9	1101	548	14	8	3292	162	1187	9.7e-230	797	POPTR_0001s38870.1	Putative_R-Genes,_predicted_from_Pythozome	Populus trichocarpa	NL			LRR and NB-ARC domains-containing disease resistance protein (best arabidopsis hit)
Ghir_A05G030170	PRGDB00062311	54.5	22	10	0	263	328	788	809	45	30.8	Disease resistance protein RGA2, putative	Putative_R-Genes,_collected_from_NCBI_Protein	Ricinus communis	NL	223535367	EQ973960	Ricinus communis genomic scaffold scf_1106159299014, whole genome shotgun sequence.
Ghir_A05G030190	PRGDB00047412	47.4	420	218	2	308	1567	1	417	3e-100	367.1	NBS type disease resistance protein	Putative_R-Genes,_collected_from_NCBI_Protein	Populus trichocarpa	NL	105922498	DQ513206	Populus trichocarpa clone 1909175 NBS type disease resistance protein mRNA, complete cds.
Ghir_A05G030230.1	PRGDB00075447	46.8	1266	548	22	638	4261	28	1226	6.5e-279	960.7	Pth.16074	Putative_R-Genes,_predicted_from_NCBI_UniGene	Populus trichocarpa	NL	105922498	DQ513206	Populus trichocarpa clone 1909175 NBS type disease resistance protein mRNA, complete cds
Ghir_A05G030240.1	PRGDB00215457	41.6	1270	712	21	182	3958	266	1516	5e-252	871.3	MDP0000671190	Putative_R-Genes,_predicted_from_Pythozome	Malus x domestica	NL
Ghir_A05G030340	PRGDB00156657	37.3	153	80	3	775	1230	147	284	7.5e-18	92.4	Glyma03g23250.1	Putative_R-Genes,_predicted_from_Pythozome	Glycine max	T			GATA transcription factor 2 (best arabidopsis hit)
Ghir_A05G030500.1	PRGDB00161868	45.6	971	480	14	4	2844	4	950	1.1e-207	723.4	cassava4.1_000595m	Putative_R-Genes,_predicted_from_Pythozome	Vitis aestivalis	NL			NB-ARC domain-containing disease resistance protein (best arabidopsis hit)
Ghir_A05G031090	PRGDB00154053	48.7	610	293	8	777	2567	287	889	3.1e-150	532.3	orange1.1g002700m	Putative_R-Genes,_predicted_from_Pythozome	Citrus sinensis	CNL			Disease resistance protein (CC-NBS-LRR class) family (best arabidopsis hit)
Ghir_A05G031160	PRGDB00192408	30.8	208	122	6	1204	1794	1570	1766	9.3e-17	88.6	Mtr.17858	Putative_R-Genes,_predicted_from_NCBI_UniGene	Medicago truncatula	NL	357472002	XM_003606238	Medicago truncatula NBS resistance protein (MTR_4g055630) mRNA, complete cds
Ghir_A05G031160.2	PRGDB00192408	30.8	208	122	6	2340	2930	1570	1766	1.4e-16	88.6	Mtr.17858	Putative_R-Genes,_predicted_from_NCBI_UniGene	Medicago truncatula	NL	357472002	XM_003606238	Medicago truncatula NBS resistance protein (MTR_4g055630) mRNA, complete cds
Ghir_A05G031410	PRGDB00189831	49.9	355	155	8	823	1863	1173	1512	1.5e-86	320.9	Hv.34567	Putative_R-Genes,_predicted_from_NCBI_UniGene	Hordeum vulgare	NL	326530731	AK369963	Hordeum vulgare subsp. vulgare mRNA for predicted protein, complete cds, clone: NIASHv2102D06
Ghir_A05G031640	PRGDB00150470	74	619	160	1	357	2210	10	628	4.3e-258	890.6	evm.model.supercontig_53.14	Putative_R-Genes,_predicted_from_Pythozome	Arabidopsis lyrata subsp. lyrata	RLP			NSP-interacting kinase 2 (best arabidopsis hit)
Ghir_A05G032140	PRGDB00202436	26	751	465	17	297	2513	1256	1927	4.5e-56	219.5	Bra010551	Putative_R-Genes,_predicted_from_Pythozome	Brassica rapa	CNL
Ghir_A05G032310	PRGDB00213048	48	102	53	0	376	681	61	162	8.5e-21	100.9	MDP0000693116	Putative_R-Genes,_predicted_from_Pythozome	Malus x domestica	RLP
Ghir_A05G032320	PRGDB00148403	28.2	174	114	2	31	528	1483	1653	3.6e-15	81.6	clementine0.9_035959m	Putative_R-Genes,_predicted_from_Pythozome	Citrus clementina	CNL			NB-ARC domain-containing disease resistance protein (best arabidopsis hit)
Ghir_A05G032360	PRGDB00214233	51.8	83	34	2	471	707	502	582	2.3e-10	67.4	MDP0000301393	Putative_R-Genes,_predicted_from_Pythozome	Malus x domestica	TNL
Ghir_A05G032400	PRGDB00166446	68.6	583	180	3	590	2335	44	624	3.9e-235	814.3	cassava4.1_003687m	Putative_R-Genes,_predicted_from_Pythozome	Vitis aestivalis	RLK-GNK2			cysteine-rich RLK (RECEPTOR-like protein kinase) 2 (best arabidopsis hit)
Ghir_A05G032430	PRGDB00166449	84.7	622	93	1	1071	2936	8	627	3.7e-304	1043.9	cassava4.1_003643m	Putative_R-Genes,_predicted_from_Pythozome	Vitis aestivalis	RLP			NSP-interacting kinase 3 (best arabidopsis hit)
Ghir_A05G032490	PRGDB00178714	51.7	298	133	5	445	1311	853	1148	1.7e-82	306.6	Sb02g022180.1	Putative_R-Genes,_predicted_from_Pythozome	Sorghum bicolor	NL			Domain of unknown function (DUF220) (best arabidopsis hit); OBP32pep, putative, expressed (best rice hit)
Ghir_A05G032490.1	PRGDB00178714	72	50	14	0	1423	1572	968	1017	4.8e-15	83.2	Sb02g022180.1	Putative_R-Genes,_predicted_from_Pythozome	Sorghum bicolor	NL			Domain of unknown function (DUF220) (best arabidopsis hit); OBP32pep, putative, expressed (best rice hit)
Ghir_A05G032930	PRGDB00146307	54.3	350	141	3	427	1419	1034	1383	2.8e-105	382.5	Bradi1g72570.1	Putative_R-Genes,_predicted_from_Pythozome	Ricinus communis	RLP			Leucine-rich receptor-like protein kinase family protein (best arabidopsis hit); systemin receptor SR160 precursor, putative, expressed (best rice hit)
Ghir_A05G033390	PRGDB00166284	73.3	660	155	4	1	1917	1	660	1.8e-277	954.5	cassava4.1_002575m	Putative_R-Genes,_predicted_from_Pythozome	Vitis aestivalis	RLP			Leucine-rich repeat protein kinase family protein (best arabidopsis hit)
Ghir_A05G033680	PRGDB00181545	45.2	1056	492	18	525	3677	915	1888	5.6e-238	824.3	440019	Putative_R-Genes,_predicted_from_Pythozome	Selaginella moellendorffii	RLP			DEAD/DEAH box helicase, putative (best arabidopsis hit)
Ghir_A05G034000	PRGDB00078703	51.7	1011	452	8	130	3153	32	1009	2.2e-291	1001.5	Vvi.8718	Putative_R-Genes,_predicted_from_NCBI_UniGene	Vitis vinifera	RLP	225467803	XM_002268472	PREDICTED: Vitis vinifera hypothetical protein LOC100255549 (LOC100255549), mRNA
Ghir_A05G034030	PRGDB00073207	38.9	149	90	1	520	966	687	834	2.7e-25	117.9	Os.86222	Putative_R-Genes,_predicted_from_NCBI_UniGene	Oryza sativa Japonica Group	NL	115485442	NM_001074397	Oryza sativa Japonica Group Os11g0462900 (Os11g0462900) mRNA, complete cds
Ghir_A05G034150	PRGWK00001406	72.2	72	20	0	2577	2792	175	246	2.6e-23	111.3	Sotub03g020700.1.1	Contributed_R-Genes	Solanum tuberosum	RLK
Ghir_A05G034240.2	PRGDB00216446	78.9	19	4	0	785	841	978	996	0.076	38.9	MDP0000196862	Putative_R-Genes,_predicted_from_Pythozome	Malus x domestica	RLP
Ghir_A05G034330	PRGDB00211385	57.4	619	225	6	166	1914	36	651	3.7e-188	658.7	Eucgr.G03081.1	Putative_R-Genes,_predicted_from_Pythozome	Eucalyptus grandis	RLP
Ghir_A05G035020	PRGDB00066523	56.8	95	39	1	371	649	1141	1235	1.4e-22	107.8	At.43039	Putative_R-Genes,_predicted_from_NCBI_UniGene	Arabidopsis thaliana	TNL	39104559	AK117122	Arabidopsis thaliana At5g40910 mRNA for putative disease resistance protein, complete cds, clone: RAFL16-65-P20
Ghir_A05G035080	PRGDB00189975	32.7	349	201	12	418	1410	1217	1549	1.5e-36	154.1	Hv.37291	Putative_R-Genes,_predicted_from_NCBI_UniGene	Hordeum vulgare	NL	326489646	AK370605	Hordeum vulgare subsp. vulgare mRNA for predicted protein, complete cds, clone: NIASHv2113B23
Ghir_A05G035180	PRGDB00147536	62.7	769	267	3	1	2247	1	769	1.2e-269	928.7	clementine0.9_003001m	Putative_R-Genes,_predicted_from_Pythozome	Citrus clementina	RLP			Leucine-rich repeat protein kinase family protein (best arabidopsis hit)
Ghir_A05G035180.1	PRGDB00147536	65.5	748	255	2	1326	3560	1	748	6.6e-280	963.8	clementine0.9_003001m	Putative_R-Genes,_predicted_from_Pythozome	Citrus clementina	RLP			Leucine-rich repeat protein kinase family protein (best arabidopsis hit)
Ghir_A05G035670	PRGWK00002314	71.3	129	36	1	292	675	55	183	1e-45	183.7	Sotub11g029390.1.1	Contributed_R-Genes	Solanum tuberosum	CNL
Ghir_A05G036140	PRGDB00215362	52.1	48	23	0	1511	1654	360	407	6.4e-07	55.8	MDP0000769222	Putative_R-Genes,_predicted_from_Pythozome	Malus x domestica	CNL
Ghir_A05G036140.1	PRGDB00215362	52.1	48	23	0	1511	1654	360	407	1e-06	55.8	MDP0000769222	Putative_R-Genes,_predicted_from_Pythozome	Malus x domestica	CNL
Ghir_A05G036150	PRGDB00143462	46.5	43	20	2	1006	1125	1064	1106	15	31.6	493465	Putative_R-Genes,_predicted_from_Pythozome	Arabidopsis lyrata	TNL			Regulator of chromosome condensation (RCC1) family protein (best arabidopsis hit)
Ghir_A05G036150.1	PRGDB00047070	32.4	136	89	3	1341	1745	1402	1535	6.2e-11	69.3	disease resistance protein (TIR-NBS-LRR class), putative	Putative_R-Genes,_collected_from_NCBI_Protein	Arabidopsis thaliana	TNL	18414202	NM_117515	Arabidopsis thaliana disease resistance protein (TIR-NBS-LRR class), putative (AT4G14370) mRNA, complete cds.
Ghir_A05G036330	PRGDB00201227	40.6	631	349	11	255	2099	992	1612	1.3e-123	443.7	Bra026094	Putative_R-Genes,_predicted_from_Pythozome	Brassica rapa	CNL
Ghir_A05G036520.1	PRGDB00078803	32.3	65	42	1	199	393	22	84	0.00016	49.3	Vvi.12916	Putative_R-Genes,_predicted_from_NCBI_UniGene	Vitis vinifera	N	225452756	XM_002283015	PREDICTED: Vitis vinifera hypothetical protein LOC100262734 (LOC100262734), mRNA
Ghir_A05G036670	PRGDB00163060	79.6	735	143	3	193	2376	19	753	0	1135.9	cassava4.1_002248m	Putative_R-Genes,_predicted_from_Pythozome	Vitis aestivalis	N			ABC-2 type transporter family protein (best arabidopsis hit)
Ghir_A05G036950	PRGDB00201591	60.4	260	99	3	688	1455	36	295	9.3e-87	321.6	Bra013728	Putative_R-Genes,_predicted_from_Pythozome	Brassica rapa	RLP
Ghir_A05G036960	PRGDB00215602	46.1	343	128	8	431	1294	964	1304	1.4e-71	270.4	MDP0000396307	Putative_R-Genes,_predicted_from_Pythozome	Malus x domestica	TNL
Ghir_A05G036970	PRGDB00216033	75	204	45	2	1762	2367	1	200	3.3e-85	316.2	MDP0000314577	Putative_R-Genes,_predicted_from_Pythozome	Malus x domestica	RLP
Ghir_A05G037000	PRGDB00147214	34.3	461	263	9	94	1392	62	510	1.1e-62	240.7	Bradi4g24850.1	Putative_R-Genes,_predicted_from_Pythozome	Ricinus communis	NL			RNI-like superfamily protein (best arabidopsis hit); expressed protein (best rice hit)
Ghir_A05G037070.1	PRGDB00181545	36.5	115	64	3	1080	1415	1263	1371	2.8e-07	58.2	440019	Putative_R-Genes,_predicted_from_Pythozome	Selaginella moellendorffii	RLP			DEAD/DEAH box helicase, putative (best arabidopsis hit)
Ghir_A05G037240.1	PRGDB00158499	62.8	43	16	0	2026	2154	138	180	1.1e-06	55.5	Glyma06g19410.1	Putative_R-Genes,_predicted_from_Pythozome	Glycine max	TNL			disease resistance protein (TIR-NBS class), putative (best arabidopsis hit)
Ghir_A05G037380	PRGDB00216650	27	356	202	10	410	1441	935	1244	3.3e-25	117.9	MDP0000252094	Putative_R-Genes,_predicted_from_Pythozome	Malus x domestica	RLP
Ghir_A05G037650	PRGDB00192469	39.3	247	125	4	792	1505	5	235	2.8e-47	189.9	Mtr.23140	Putative_R-Genes,_predicted_from_NCBI_UniGene	Medicago truncatula	N	357474626	XM_003607550	Medicago truncatula NBS-LRR resistance-like protein 4U (MTR_4g080080) mRNA, complete cds
Ghir_A05G037730	PRGDB00183143	65.7	359	119	3	172	1242	1	357	1.4e-133	476.1	GSVIVT01011370001	Putative_R-Genes,_predicted_from_Pythozome	Vitis vinifera	RLP			Leucine-rich repeat receptor-like protein kinase family protein (best arabidopsis hit)
Ghir_A05G037850	PRGDB00211657	57.8	45	19	0	572	706	670	714	8.3e-10	65.1	Eucgr.H02157.1	Putative_R-Genes,_predicted_from_Pythozome	Eucalyptus grandis	TNL
Ghir_A05G037950	PRGDB00189199	45.5	66	34	1	658	855	200	263	1.8e-07	57.4	Gma.64030	Putative_R-Genes,_predicted_from_NCBI_UniGene	Glycine max	T	223452614	FJ014883	Glycine max clone cw22 disease-resistance protein mRNA, complete cds
Ghir_A05G037950.1	PRGDB00201835	46.3	67	34	1	646	846	260	324	1.8e-07	56.6	Bra013144	Putative_R-Genes,_predicted_from_Pythozome	Brassica rapa	TNL
Ghir_A05G038050	PRGDB00211657	61.8	55	21	0	339	503	670	724	1.1e-13	77.8	Eucgr.H02157.1	Putative_R-Genes,_predicted_from_Pythozome	Eucalyptus grandis	TNL
Ghir_A05G038190	PRGDB00216122	30.2	411	224	16	378	1499	9	393	2.3e-32	140.2	MDP0000283975	Putative_R-Genes,_predicted_from_Pythozome	Malus x domestica	RLK
Ghir_A05G038780	PRGDB00184310	87.7	57	6	1	866	1036	1119	1174	5.1e-21	102.8	GSVIVT01034283001	Putative_R-Genes,_predicted_from_Pythozome	Vitis vinifera	NL			receptor like protein 14 (best arabidopsis hit)
Ghir_A05G039120	PRGDB00218046	53	132	55	4	906	1298	363	488	1.2e-30	135.6	Thhalv10027276m	Putative_R-Genes,_predicted_from_Pythozome	Eutrema halophilum	TNL
Ghir_A05G039120.2	PRGDB00218046	43.3	104	52	4	787	1095	363	460	1.1e-15	85.9	Thhalv10027276m	Putative_R-Genes,_predicted_from_Pythozome	Eutrema halophilum	TNL
Ghir_A05G039350	PRGDB00078803	37.9	535	313	9	540	2114	75	600	1e-91	337.8	Vvi.12916	Putative_R-Genes,_predicted_from_NCBI_UniGene	Vitis vinifera	N	225452756	XM_002283015	PREDICTED: Vitis vinifera hypothetical protein LOC100262734 (LOC100262734), mRNA
Ghir_A05G039360	PRGDB00201508	57.1	410	128	4	193	1296	2	405	1.2e-123	443.4	Bra021474	Putative_R-Genes,_predicted_from_Pythozome	Brassica rapa	RLP
Ghir_A05G039420	PRGDB00192408	25.7	214	132	5	833	1462	1573	1763	1.2e-08	61.2	Mtr.17858	Putative_R-Genes,_predicted_from_NCBI_UniGene	Medicago truncatula	NL	357472002	XM_003606238	Medicago truncatula NBS resistance protein (MTR_4g055630) mRNA, complete cds
Ghir_A05G039570.1	PRGDB00216650	33.3	132	76	4	1783	2145	1114	1244	5.8e-15	82.8	MDP0000252094	Putative_R-Genes,_predicted_from_Pythozome	Malus x domestica	RLP
Ghir_A05G039600	PRGDB00152272	81.6	643	112	3	4	1923	3	642	2.3e-301	1033.9	orange1.1g006505m	Putative_R-Genes,_predicted_from_Pythozome	Citrus sinensis	N			ABC-2 type transporter family protein (best arabidopsis hit)
Ghir_A05G039650	PRGDB00079067	28.6	339	220	8	588	1556	935	1267	2.4e-27	123.6	Vvi.24747	Putative_R-Genes,_predicted_from_NCBI_UniGene	Vitis vinifera	NL	225424433	XM_002281516	PREDICTED: Vitis vinifera hypothetical protein LOC100249092 (LOC100249092), mRNA
Ghir_A05G040340	PRGDB00061532	62.5	32	12	0	569	664	1052	1083	8.2e-06	52	disease resistance protein	Putative_R-Genes,_collected_from_NCBI_Protein	Brassica rapa subsp. pekinensis	TNL	227438196	FJ842807	Brassica rapa subsp. pekinensis isolate BrTNL50 disease resistance protein gene, complete cds.
Ghir_A05G040490	PRGDB00200844	53.1	435	175	8	1005	2303	53	460	3.6e-120	432.6	Bra008427	Putative_R-Genes,_predicted_from_Pythozome	Brassica rapa	RLP
Ghir_A05G040620	PRGDB00192408	59.8	204	75	1	767	1378	1570	1766	4.3e-67	255.4	Mtr.17858	Putative_R-Genes,_predicted_from_NCBI_UniGene	Medicago truncatula	NL	357472002	XM_003606238	Medicago truncatula NBS resistance protein (MTR_4g055630) mRNA, complete cds
Ghir_A05G040920	PRGDB00211657	55.6	45	20	0	374	508	670	714	1.8e-10	67.4	Eucgr.H02157.1	Putative_R-Genes,_predicted_from_Pythozome	Eucalyptus grandis	TNL
Ghir_A05G040920.1	PRGDB00211657	55.6	45	20	0	673	807	670	714	3e-10	67.4	Eucgr.H02157.1	Putative_R-Genes,_predicted_from_Pythozome	Eucalyptus grandis	TNL
Ghir_A05G041170	PRGDB00217154	53.4	73	32	2	463	678	32	103	4.7e-11	68.9	MDP0000385217	Putative_R-Genes,_predicted_from_Pythozome	Malus x domestica	RLP
Ghir_A05G041350	PRGDB00201821	43	107	61	0	626	946	959	1065	1.1e-19	98.6	Bra012540	Putative_R-Genes,_predicted_from_Pythozome	Brassica rapa	TNL
Ghir_A05G041500	PRGDB00214355	89.5	19	2	0	1417	1473	989	1007	0.38	36.2	MDP0000310183	Putative_R-Genes,_predicted_from_Pythozome	Malus x domestica	CNL
Ghir_A05G041650	PRGDB00078970	30.1	256	168	4	606	1361	1113	1361	3e-24	113.6	Vvi.20745	Putative_R-Genes,_predicted_from_NCBI_UniGene	Vitis vinifera	CNL	225447515	XM_002268092	PREDICTED: Vitis vinifera hypothetical protein LOC100252764 (LOC100252764), mRNA
Ghir_A05G041650.1	PRGDB00078970	36.1	97	61	1	670	960	1136	1231	1.8e-09	64.7	Vvi.20745	Putative_R-Genes,_predicted_from_NCBI_UniGene	Vitis vinifera	CNL	225447515	XM_002268092	PREDICTED: Vitis vinifera hypothetical protein LOC100252764 (LOC100252764), mRNA
Ghir_A05G041820	PRGDB00211657	68.9	45	14	0	429	563	670	714	6.9e-13	74.7	Eucgr.H02157.1	Putative_R-Genes,_predicted_from_Pythozome	Eucalyptus grandis	TNL
Ghir_A05G042120.1	PRGDB00202237	32.6	95	60	3	1160	1444	1815	1905	1.9e-06	55.5	Bra017241	Putative_R-Genes,_predicted_from_Pythozome	Brassica rapa	N
Ghir_A05G042210	PRGDB00079007	71.9	1361	363	7	179	4219	1	1356	0	1911	Vvi.22563	Putative_R-Genes,_predicted_from_NCBI_UniGene	Vitis vinifera	CN	225454829	XM_002274716	PREDICTED: Vitis vinifera hypothetical protein LOC100257868 (LOC100257868), mRNA
Ghir_A05G042820	PRGDB00167788	60.7	117	46	0	360	710	40	156	6.4e-37	155.2	Medtr2g121840.1	Putative_R-Genes,_predicted_from_Pythozome	Medicago truncatula	RLP			Leucine-rich repeat transmembrane protein kinase protein (best arabidopsis hit)
Ghir_A05G042980	PRGDB00067001	72.2	352	87	4	426	1466	1	346	1.7e-130	466.8	At.66955	Putative_R-Genes,_predicted_from_NCBI_UniGene	Arabidopsis thaliana	RPW8-NL	110737162	AK228620	Arabidopsis thaliana mRNA for ADR1, complete cds, clone: RAFL15-45-C23
Ghir_A05G043440	PRGDB00189664	50	58	25	2	604	771	636	691	2.7e-07	58.2	Hv.31767	Putative_R-Genes,_predicted_from_NCBI_UniGene	Hordeum vulgare	NL	326501247	AK367652	Hordeum vulgare subsp. vulgare mRNA for predicted protein, complete cds, clone: NIASHv2059P21
Ghir_A06G000100	PRGDB00177064	48.1	54	28	0	527	688	380	433	1.2e-09	63.5	29912.m005281	Putative_R-Genes,_predicted_from_Pythozome	Oryza barthii	N			Flavin-binding monooxygenase family protein (best arabidopsis hit)
Ghir_A06G000100.1	PRGDB00177064	48.1	54	28	0	736	897	380	433	1.5e-09	63.5	29912.m005281	Putative_R-Genes,_predicted_from_Pythozome	Oryza barthii	N			Flavin-binding monooxygenase family protein (best arabidopsis hit)
Ghir_A06G000120	PRGDB00215055	29.9	154	76	5	573	959	684	830	2.9e-12	73.6	MDP0000248164	Putative_R-Genes,_predicted_from_Pythozome	Malus x domestica	NL
Ghir_A06G000180	PRGDB00215380	56.2	178	38	3	143	562	2	177	3.6e-43	174.9	MDP0000255887	Putative_R-Genes,_predicted_from_Pythozome	Malus x domestica	TNL
Ghir_A06G000230.1	PRGDB00078803	48.9	940	453	8	1151	3913	315	1246	1.5e-252	872.8	Vvi.12916	Putative_R-Genes,_predicted_from_NCBI_UniGene	Vitis vinifera	N	225452756	XM_002283015	PREDICTED: Vitis vinifera hypothetical protein LOC100262734 (LOC100262734), mRNA
Ghir_A06G000280	PRGDB00202605	56.2	240	101	4	392	1102	10	248	5.6e-77	288.5	Carubv10019327m	Putative_R-Genes,_predicted_from_Pythozome	Capsella rubella	Other
Ghir_A06G000330	PRGDB00184271	89.4	47	4	1	491	631	662	707	1.2e-17	91.3	GRMZM2G162531_T01	Putative_R-Genes,_predicted_from_Pythozome	Zea mays	RLP			STRUBBELIG-receptor family 8 (best arabidopsis hit); STRUBBELIG-RECEPTOR FAMILY 7 precursor, putative, expressed (best rice hit)
Ghir_A06G000520	PRGDB00047070	31.1	74	48	1	817	1038	1482	1552	0.0024	44.3	disease resistance protein (TIR-NBS-LRR class), putative	Putative_R-Genes,_collected_from_NCBI_Protein	Arabidopsis thaliana	TNL	18414202	NM_117515	Arabidopsis thaliana disease resistance protein (TIR-NBS-LRR class), putative (AT4G14370) mRNA, complete cds.
Ghir_A06G000650	PRGDB00177734	33.3	108	71	1	289	609	301	408	1.8e-08	59.7	30138.m004038	Putative_R-Genes,_predicted_from_Pythozome	Oryza barthii	N			Protein kinase superfamily protein (best arabidopsis hit)
Ghir_A06G000930	PRGDB00177991	55.5	902	389	8	623	3310	2	897	1.8e-268	925.6	30170.m014044	Putative_R-Genes,_predicted_from_Pythozome	Oryza barthii	RLP			Leucine-rich repeat protein kinase family protein (best arabidopsis hit)
Ghir_A06G000930.1	PRGDB00177991	55.5	902	389	8	626	3313	2	897	1.8e-268	925.6	30170.m014044	Putative_R-Genes,_predicted_from_Pythozome	Oryza barthii	RLP			Leucine-rich repeat protein kinase family protein (best arabidopsis hit)
Ghir_A06G001170	PRGDB00217904	31.3	147	91	4	200	610	183	329	3.3e-09	62.4	Thhalv10018718m	Putative_R-Genes,_predicted_from_Pythozome	Eutrema halophilum	TNL
Ghir_A06G001200	PRGDB00178213	57.8	90	38	0	3428	3697	1013	1102	9.8e-23	109.4	30205.m001595	Putative_R-Genes,_predicted_from_Pythozome	Oryza barthii	NL			LRR and NB-ARC domains-containing disease resistance protein (best arabidopsis hit)
Ghir_A06G001210.1	PRGDB00174743	49.1	794	322	9	172	2331	1	786	4.5e-192	671.8	POPTR_0017s03100.1	Putative_R-Genes,_predicted_from_Pythozome	Populus trichocarpa	CNL			LRR and NB-ARC domains-containing disease resistance protein (best arabidopsis hit)
Ghir_A06G001450.1	PRGDB00213491	63	54	18	2	1663	1821	874	926	8.8e-10	65.5	MDP0000220175	Putative_R-Genes,_predicted_from_Pythozome	Malus x domestica	NL
Ghir_A06G001490	PRGDB00211657	59.1	44	18	0	503	634	674	717	6.7e-08	58.5	Eucgr.H02157.1	Putative_R-Genes,_predicted_from_Pythozome	Eucalyptus grandis	TNL
Ghir_A06G001510	PRGDB00217252	34.8	46	23	1	862	978	1222	1267	36	30.4	MDP0000284128	Putative_R-Genes,_predicted_from_Pythozome	Malus x domestica	RLP
Ghir_A06G001880	PRGDB00062348	40.9	93	53	2	2448	2723	163	254	4e-11	70.5	E3 ligase	Putative_R-Genes,_collected_from_NCBI_Protein	Oryza sativa Japonica Group	N	324029070	HQ123581	Oryza sativa Japonica Group cultivar Taipei 309 E3 ligase (BBI1) mRNA, complete cds.
Ghir_A06G001940	PRGDB00070731	42.5	87	48	1	627	887	23	107	3.2e-12	72.8	Mdo.689	Putative_R-Genes,_predicted_from_NCBI_UniGene	Malus x domestica	T	292668962	GU732467	Malus x domestica AP2 domain class transcription factor (AP2D43) mRNA, complete cds
Ghir_A06G002050	PRGDB00073072	26.4	106	65	4	1507	1797	219	320	2.8	34.7	Os.80143	Putative_R-Genes,_predicted_from_NCBI_UniGene	Oryza sativa Japonica Group	CNL	32975074	AK065056	Oryza sativa Japonica Group cDNA clone:J013001J06, full insert sequence
Ghir_A06G002110	PRGDB00211657	47.8	46	24	0	371	508	674	719	9e-06	51.6	Eucgr.H02157.1	Putative_R-Genes,_predicted_from_Pythozome	Eucalyptus grandis	TNL
Ghir_A06G002160	PRGDB00217072	52.4	315	124	5	354	1295	1122	1411	3.4e-81	303.1	MDP0000261726	Putative_R-Genes,_predicted_from_Pythozome	Malus x domestica	RLP
Ghir_A06G002340	PRGDB00191296	43.7	263	148	0	701	1489	257	519	8.6e-51	201.4	Lsa.44031	Putative_R-Genes,_predicted_from_NCBI_UniGene	Lactuca sativa	N	329679120	JI581626	TSA: Lactuca sativa CLC_LTR_V1A_17001 mRNA sequence
Ghir_A06G002710	PRGDB00192408	25.1	223	140	6	1073	1726	1563	1763	6.9e-07	55.8	Mtr.17858	Putative_R-Genes,_predicted_from_NCBI_UniGene	Medicago truncatula	NL	357472002	XM_003606238	Medicago truncatula NBS resistance protein (MTR_4g055630) mRNA, complete cds
Ghir_A06G002720.1	PRGDB00173996	80	130	25	1	579	968	606	734	1.4e-56	220.7	ppa001184m	Putative_R-Genes,_predicted_from_Pythozome	Prunus persica	RLP			Leucine-rich repeat transmembrane protein kinase family protein (best arabidopsis hit)
Ghir_A06G002750	PRGDB00161885	67.1	966	311	3	97	2994	9	967	0	1285.4	cassava4.1_001017m	Putative_R-Genes,_predicted_from_Pythozome	Vitis aestivalis	RLP			Leucine-rich receptor-like protein kinase family protein (best arabidopsis hit)
Ghir_A06G002800	PRGDB00147638	58	1185	471	11	368	3901	1	1165	0	1319.7	clementine0.9_000783m	Putative_R-Genes,_predicted_from_Pythozome	Citrus clementina	CNL			NB-ARC domain-containing disease resistance protein (best arabidopsis hit)
Ghir_A06G002810	PRGDB00147638	52.1	1160	532	9	205	3630	1	1154	0	1151.3	clementine0.9_000783m	Putative_R-Genes,_predicted_from_Pythozome	Citrus clementina	CNL			NB-ARC domain-containing disease resistance protein (best arabidopsis hit)
Ghir_A06G002810.1	PRGDB00147638	52.1	1160	532	9	205	3630	1	1154	0	1151.3	clementine0.9_000783m	Putative_R-Genes,_predicted_from_Pythozome	Citrus clementina	CNL			NB-ARC domain-containing disease resistance protein (best arabidopsis hit)
Ghir_A06G003210	PRGDB00216981	35.9	312	176	8	2206	3081	110	417	2.6e-49	197.6	MDP0000297928	Putative_R-Genes,_predicted_from_Pythozome	Malus x domestica	RLP
Ghir_A06G003260	PRGDB00192459	32.1	109	70	2	753	1079	253	357	6e-07	55.8	Mtr.22577	Putative_R-Genes,_predicted_from_NCBI_UniGene	Medicago truncatula	CNL	357509266	XM_003624874	Medicago truncatula NB-LRR type disease resistance protein (MTR_7g089080) mRNA, complete cds
Ghir_A06G003340	PRGDB00171933	53.6	619	272	5	485	2314	650	1262	6.7e-182	637.9	LOC_Os11g27450.1	Putative_R-Genes,_predicted_from_Pythozome	Oryza sativa	NL			RNI-like superfamily protein (best arabidopsis hit)
Ghir_A06G003710	PRGDB00213421	42.6	54	27	1	1453	1602	298	351	0.014	41.6	MDP0000280399	Putative_R-Genes,_predicted_from_Pythozome	Malus x domestica	RLP
Ghir_A06G003750	PRGDB00174306	55.6	1038	416	7	634	3624	23	1056	0	1096.3	ppa025153m	Putative_R-Genes,_predicted_from_Pythozome	Prunus persica	RLP			Leucine-rich repeat receptor-like protein kinase family protein (best arabidopsis hit)
Ghir_A06G003890	PRGDB00214485	69.5	344	71	2	2581	3510	637	980	8.7e-135	481.5	MDP0000287433	Putative_R-Genes,_predicted_from_Pythozome	Malus x domestica	CN
Ghir_A06G003890.1	PRGDB00214485	55.6	523	156	7	375	1742	467	980	1.7e-145	516.2	MDP0000287433	Putative_R-Genes,_predicted_from_Pythozome	Malus x domestica	CN
Ghir_A06G004740	PRGDB00167788	68.1	119	38	0	454	810	38	156	2e-43	177.2	Medtr2g121840.1	Putative_R-Genes,_predicted_from_Pythozome	Medicago truncatula	RLP			Leucine-rich repeat transmembrane protein kinase protein (best arabidopsis hit)
Ghir_A06G004900	PRGDB00213320	61.9	349	64	4	2172	3101	436	754	9.1e-113	408.3	MDP0000177665	Putative_R-Genes,_predicted_from_Pythozome	Malus x domestica	T
Ghir_A06G004940	PRGDB00217072	57.6	257	107	1	862	1626	1198	1454	2.7e-79	296.2	MDP0000261726	Putative_R-Genes,_predicted_from_Pythozome	Malus x domestica	RLP
Ghir_A06G005090	PRGDB00147146	57	128	54	1	1913	2296	55	181	1.6e-37	157.9	Bradi4g14700.1	Putative_R-Genes,_predicted_from_Pythozome	Ricinus communis	NL			NB-ARC domain-containing disease resistance protein (best arabidopsis hit); disease resistance protein RPM1, putative (best rice hit)
Ghir_A06G005090.1	PRGDB00147146	51.9	181	86	1	1301	1843	2	181	5.9e-49	195.7	Bradi4g14700.1	Putative_R-Genes,_predicted_from_Pythozome	Ricinus communis	NL			NB-ARC domain-containing disease resistance protein (best arabidopsis hit); disease resistance protein RPM1, putative (best rice hit)
Ghir_A06G005110	PRGDB00213428	29.9	117	71	3	1169	1507	1042	1151	2e-11	71.2	MDP0000525273	Putative_R-Genes,_predicted_from_Pythozome	Malus x domestica	CNL
Ghir_A06G005230	PRGDB00183040	36.3	91	49	5	2708	2968	581	666	1.8e-08	61.6	GSVIVT01007793001	Putative_R-Genes,_predicted_from_Pythozome	Vitis vinifera	NL			RING/U-box superfamily protein (best arabidopsis hit)
Ghir_A06G005810.1	PRGDB00078883	34.1	41	27	0	1308	1186	514	554	160	29.3	Vvi.16557	Putative_R-Genes,_predicted_from_NCBI_UniGene	Vitis vinifera	RLP	225441697	XM_002277255	PREDICTED: Vitis vinifera hypothetical protein LOC100262317 (LOC100262317), mRNA
Ghir_A06G005900	PRGDB00215095	28.4	577	348	11	253	1950	21	543	2.2e-50	200.3	MDP0000319352	Putative_R-Genes,_predicted_from_Pythozome	Malus x domestica	TNL
Ghir_A06G006120	PRGDB00182255	29.2	195	101	5	563	1144	1525	1683	2e-11	71.2	441722	Putative_R-Genes,_predicted_from_Pythozome	Selaginella moellendorffii	N			pleiotropic drug resistance 12 (best arabidopsis hit)
Ghir_A06G006120.1	PRGDB00182255	29.2	195	101	5	574	1155	1525	1683	2.3e-11	71.2	441722	Putative_R-Genes,_predicted_from_Pythozome	Selaginella moellendorffii	N			pleiotropic drug resistance 12 (best arabidopsis hit)
Ghir_A06G006210	PRGDB00149056	87.9	348	40	2	1113	2153	309	655	4.5e-172	604.7	clementine0.9_004533m	Putative_R-Genes,_predicted_from_Pythozome	Citrus clementina	RLP			Leucine-rich repeat protein kinase family protein (best arabidopsis hit)
Ghir_A06G006230	PRGDB00192523	37	181	111	2	1544	2077	3	183	2e-29	131.7	Mtr.24619	Putative_R-Genes,_predicted_from_NCBI_UniGene	Medicago truncatula	RLP	357513572	XM_003627027	Medicago truncatula Receptor-like protein kinase (MTR_8g014820) mRNA, complete cds
Ghir_A06G006300	PRGDB00189912	24.6	187	129	4	826	1353	197	382	1.3e-13	78.2	Hv.36068	Putative_R-Genes,_predicted_from_NCBI_UniGene	Hordeum vulgare	N	326508777	AK364708	Hordeum vulgare subsp. vulgare mRNA for predicted protein, complete cds, clone: NIASHv2027L24
Ghir_A06G006740	PRGDB00202169	27.8	216	126	6	326	889	16	229	1.2e-15	84.3	Bra007015	Putative_R-Genes,_predicted_from_Pythozome	Brassica rapa	RLP
Ghir_A06G006780.4	PRGDB00169407	49.3	225	46	3	2583	3257	1076	1232	1.3e-42	175.3	Medtr6g099150.1	Putative_R-Genes,_predicted_from_Pythozome	Medicago truncatula	TNL			disease resistance protein (TIR-NBS-LRR class), putative (best arabidopsis hit)
Ghir_A06G006860	PRGDB00078682	50	70	35	0	166	375	779	848	1.9e-16	86.7	Vvi.8276	Putative_R-Genes,_predicted_from_NCBI_UniGene	Vitis vinifera	NL	225452519	XM_002275052	PREDICTED: Vitis vinifera hypothetical protein LOC100250803 (LOC100250803), mRNA
Ghir_A06G006870.1	PRGDB00078682	50	70	35	0	2051	2260	779	848	5.8e-16	86.7	Vvi.8276	Putative_R-Genes,_predicted_from_NCBI_UniGene	Vitis vinifera	NL	225452519	XM_002275052	PREDICTED: Vitis vinifera hypothetical protein LOC100250803 (LOC100250803), mRNA
Ghir_A06G006890	PRGDB00147146	41.8	194	112	1	1670	2251	2	194	1.6e-36	154.5	Bradi4g14700.1	Putative_R-Genes,_predicted_from_Pythozome	Ricinus communis	NL			NB-ARC domain-containing disease resistance protein (best arabidopsis hit); disease resistance protein RPM1, putative (best rice hit)
Ghir_A06G006900	PRGDB00213507	49.7	300	128	5	531	1418	82	362	8.8e-74	279.3	MDP0000288100	Putative_R-Genes,_predicted_from_Pythozome	Malus x domestica	NL
Ghir_A06G006910	PRGDB00070731	41.3	109	60	1	454	768	2	110	2.6e-15	83.2	Mdo.689	Putative_R-Genes,_predicted_from_NCBI_UniGene	Malus x domestica	T	292668962	GU732467	Malus x domestica AP2 domain class transcription factor (AP2D43) mRNA, complete cds
Ghir_A06G007310	PRGDB00167788	73.6	144	33	2	276	704	21	160	1.1e-55	217.6	Medtr2g121840.1	Putative_R-Genes,_predicted_from_Pythozome	Medicago truncatula	RLP			Leucine-rich repeat transmembrane protein kinase protein (best arabidopsis hit)
Ghir_A06G007650	PRGDB00213507	38.8	67	41	0	940	1140	181	247	2.7e-06	54.3	MDP0000288100	Putative_R-Genes,_predicted_from_Pythozome	Malus x domestica	NL
Ghir_A06G007740	PRGDB00177067	64.7	773	215	6	43	2187	1	773	5.4e-278	956.4	29912.m005314	Putative_R-Genes,_predicted_from_Pythozome	Oryza barthii	N			U-box domain-containing protein kinase family protein (best arabidopsis hit)
Ghir_A06G007740.1	PRGDB00177067	64.3	773	211	6	114	2237	1	773	2.4e-276	951.4	29912.m005314	Putative_R-Genes,_predicted_from_Pythozome	Oryza barthii	N			U-box domain-containing protein kinase family protein (best arabidopsis hit)
Ghir_A06G007810	PRGDB00216326	29.3	208	130	5	259	882	780	970	2.4e-14	80.1	MDP0000255780	Putative_R-Genes,_predicted_from_Pythozome	Malus x domestica	RLP
Ghir_A06G007880	PRGDB00204876	47.6	143	55	5	332	760	1436	1558	2e-24	113.2	Lus10019708	Putative_R-Genes,_predicted_from_Pythozome	Linum usitatissimum	TNL
Ghir_A06G007970.1	PRGDB00143314	80.1	136	27	0	320	727	1213	1348	7.6e-60	231.5	492950	Putative_R-Genes,_predicted_from_Pythozome	Arabidopsis lyrata	NL			NB-ARC domain-containing disease resistance protein (best arabidopsis hit)
Ghir_A06G007990	PRGDB00073072	43.3	60	33	1	2297	2473	524	583	0.0026	44.3	Os.80143	Putative_R-Genes,_predicted_from_NCBI_UniGene	Oryza sativa Japonica Group	CNL	32975074	AK065056	Oryza sativa Japonica Group cDNA clone:J013001J06, full insert sequence
Ghir_A06G008280	PRGDB00079040	39.9	143	72	4	379	774	1	140	1e-17	91.7	Vvi.23988	Putative_R-Genes,_predicted_from_NCBI_UniGene	Vitis vinifera	RLP	225442062	XM_002272327	PREDICTED: Vitis vinifera hypothetical protein LOC100260039 (LOC100260039), mRNA
Ghir_A06G008310.1	PRGDB00078883	38.6	44	27	0	2441	2310	172	215	0.44	38.1	Vvi.16557	Putative_R-Genes,_predicted_from_NCBI_UniGene	Vitis vinifera	RLP	225441697	XM_002277255	PREDICTED: Vitis vinifera hypothetical protein LOC100262317 (LOC100262317), mRNA
Ghir_A06G008330	PRGDB00070731	51.4	74	28	1	151	348	9	82	6.7e-14	78.2	Mdo.689	Putative_R-Genes,_predicted_from_NCBI_UniGene	Malus x domestica	T	292668962	GU732467	Malus x domestica AP2 domain class transcription factor (AP2D43) mRNA, complete cds
Ghir_A06G008460	PRGDB00192324	61.2	165	47	3	1838	2326	1124	1273	2.6e-49	197.2	Mtr.12478	Putative_R-Genes,_predicted_from_NCBI_UniGene	Medicago truncatula	TNL	357500090	XM_003620286	Medicago truncatula Sucrose synthase (MTR_6g081120) mRNA, complete cds
Ghir_A06G008580	PRGDB00070731	55.2	58	26	0	151	324	25	82	7.9e-13	73.9	Mdo.689	Putative_R-Genes,_predicted_from_NCBI_UniGene	Malus x domestica	T	292668962	GU732467	Malus x domestica AP2 domain class transcription factor (AP2D43) mRNA, complete cds
Ghir_A06G008720	PRGDB00216498	81.1	456	81	1	235	1587	508	963	1.4e-220	766.5	MDP0000177416	Putative_R-Genes,_predicted_from_Pythozome	Malus x domestica	CN
Ghir_A06G008810	PRGDB00211657	64.4	45	16	0	303	437	670	714	5.2e-12	72	Eucgr.H02157.1	Putative_R-Genes,_predicted_from_Pythozome	Eucalyptus grandis	TNL
Ghir_A06G008880	PRGDB00176387	82.3	945	162	2	699	3521	20	963	0	1550.4	29739.m003626	Putative_R-Genes,_predicted_from_Pythozome	Oryza barthii	RLP			Leucine-rich receptor-like protein kinase family protein (best arabidopsis hit)
Ghir_A06G009240	PRGDB00176448	48.9	613	289	6	329	2119	14	618	4.2e-151	535	29794.m003312	Putative_R-Genes,_predicted_from_Pythozome	Oryza barthii	RLP			leucine-rich repeat transmembrane protein kinase family protein (best arabidopsis hit)
Ghir_A06G009280	PRGDB00214085	56.2	112	49	0	307	642	227	338	1.6e-26	120.9	MDP0000194411	Putative_R-Genes,_predicted_from_Pythozome	Malus x domestica	N
Ghir_A06G009370	PRGDB00075417	52.8	180	65	1	456	995	12	171	4.6e-49	195.3	Pth.16040	Putative_R-Genes,_predicted_from_NCBI_UniGene	Populus trichocarpa	TNL	105923234	DQ513251	Populus trichocarpa clone 806367 TIR-NBS-LRR type disease resistance protein mRNA, complete cds
Ghir_A06G009400.1	PRGDB00202169	38.6	57	35	0	2081	2251	13	69	9.2e-06	52.4	Bra007015	Putative_R-Genes,_predicted_from_Pythozome	Brassica rapa	RLP
Ghir_A06G009600	PRGDB00078524	74.8	504	124	1	355	1866	999	1499	7.5e-219	760	Vvi.704	Putative_R-Genes,_predicted_from_NCBI_UniGene	Vitis vinifera	RLP	225429385	XM_002278307	PREDICTED: Vitis vinifera hypothetical protein LOC100268155 (LOC100268155), mRNA
Ghir_A06G009620	PRGDB00166548	64.7	1006	347	6	932	3937	21	1022	0	1298.9	cassava4.1_000829m	Putative_R-Genes,_predicted_from_Pythozome	Vitis aestivalis	RLP			Protein kinase family protein with leucine-rich repeat domain (best arabidopsis hit)
Ghir_A06G009770	PRGDB00070731	50.7	69	34	0	342	548	20	88	2.3e-13	76.6	Mdo.689	Putative_R-Genes,_predicted_from_NCBI_UniGene	Malus x domestica	T	292668962	GU732467	Malus x domestica AP2 domain class transcription factor (AP2D43) mRNA, complete cds
Ghir_A06G009900	PRGDB00184285	55	302	116	5	271	1122	995	1294	4e-89	328.2	AC195587.4_FGT004	Putative_R-Genes,_predicted_from_Pythozome	Zea mays	CNL			alpha/beta-Hydrolases superfamily protein (best arabidopsis hit); stripe rust resistance protein Yr10, putative, expressed (best rice hit)
Ghir_A06G009900.1	PRGDB00184285	50.7	302	114	6	271	1077	995	1294	5.3e-77	288.1	AC195587.4_FGT004	Putative_R-Genes,_predicted_from_Pythozome	Zea mays	CNL			alpha/beta-Hydrolases superfamily protein (best arabidopsis hit); stripe rust resistance protein Yr10, putative, expressed (best rice hit)
Ghir_A06G010130	PRGDB00175018	66.7	947	304	5	245	3064	12	954	0	1271.9	POPTR_0018s12100.1	Putative_R-Genes,_predicted_from_Pythozome	Populus trichocarpa	RLP			Leucine-rich repeat transmembrane protein kinase family protein (best arabidopsis hit)
Ghir_A06G010300	PRGDB00149250	79.3	835	172	1	860	3361	17	851	0	1333.9	evm.model.supercontig_1348.2	Putative_R-Genes,_predicted_from_Pythozome	Arabidopsis lyrata subsp. lyrata	RLP			Leucine-rich repeat protein kinase family protein (best arabidopsis hit)
Ghir_A06G010490	PRGDB00070731	41	78	43	1	171	404	11	85	6.3e-08	58.5	Mdo.689	Putative_R-Genes,_predicted_from_NCBI_UniGene	Malus x domestica	T	292668962	GU732467	Malus x domestica AP2 domain class transcription factor (AP2D43) mRNA, complete cds
Ghir_A06G010500	PRGDB00073072	47.1	601	306	4	632	2410	62	658	4e-151	535.4	Os.80143	Putative_R-Genes,_predicted_from_NCBI_UniGene	Oryza sativa Japonica Group	CNL	32975074	AK065056	Oryza sativa Japonica Group cDNA clone:J013001J06, full insert sequence
Ghir_A06G010850	PRGDB00191296	32	269	171	6	733	1533	261	519	3.4e-22	106.7	Lsa.44031	Putative_R-Genes,_predicted_from_NCBI_UniGene	Lactuca sativa	N	329679120	JI581626	TSA: Lactuca sativa CLC_LTR_V1A_17001 mRNA sequence
Ghir_A06G010990	PRGDB00079067	25.4	256	155	6	2226	2909	927	1174	1.8e-13	78.6	Vvi.24747	Putative_R-Genes,_predicted_from_NCBI_UniGene	Vitis vinifera	NL	225424433	XM_002281516	PREDICTED: Vitis vinifera hypothetical protein LOC100249092 (LOC100249092), mRNA
Ghir_A06G011090	PRGDB00217252	61.6	86	33	0	329	586	683	768	1.3e-26	120.9	MDP0000284128	Putative_R-Genes,_predicted_from_Pythozome	Malus x domestica	RLP
Ghir_A06G011120	PRGDB00184310	71.2	156	45	0	1300	1767	884	1039	2.4e-56	221.1	GSVIVT01034283001	Putative_R-Genes,_predicted_from_Pythozome	Vitis vinifera	NL			receptor like protein 14 (best arabidopsis hit)
Ghir_A06G011120.4	PRGDB00184310	71.2	156	45	0	1300	1767	884	1039	2.7e-56	221.1	GSVIVT01034283001	Putative_R-Genes,_predicted_from_Pythozome	Vitis vinifera	NL			receptor like protein 14 (best arabidopsis hit)
Ghir_A06G011200	PRGDB00216981	38.1	312	166	9	618	1493	110	414	3.9e-49	196.4	MDP0000297928	Putative_R-Genes,_predicted_from_Pythozome	Malus x domestica	RLP
Ghir_A06G011610	PRGDB00184523	40.1	147	73	6	4095	3661	924	1057	5e-19	97.1	GSVIVT01037631001	Putative_R-Genes,_predicted_from_Pythozome	Vitis vinifera	CNL			NB-ARC domain-containing disease resistance protein (best arabidopsis hit)
Ghir_A06G011610.1	PRGDB00192311	46	126	68	0	4921	4544	247	372	1.9e-25	118.6	Mtr.11833	Putative_R-Genes,_predicted_from_NCBI_UniGene	Medicago truncatula	TNL	357499226	XM_003619854	Medicago truncatula Disease resistance protein (MTR_6g071550) mRNA, complete cds
Ghir_A06G011920	PRGDB00177932	60.3	707	260	6	1	2097	1	694	2.4e-236	818.1	30169.m006604	Putative_R-Genes,_predicted_from_Pythozome	Oryza barthii	RLP			STRUBBELIG-receptor family 5 (best arabidopsis hit)
Ghir_A06G012080	PRGDB00070731	47.7	65	31	1	947	1132	25	89	1.7e-08	61.2	Mdo.689	Putative_R-Genes,_predicted_from_NCBI_UniGene	Malus x domestica	T	292668962	GU732467	Malus x domestica AP2 domain class transcription factor (AP2D43) mRNA, complete cds
Ghir_A06G012130	PRGDB00078970	51.7	58	28	0	1994	2167	1135	1192	4.4e-07	57.4	Vvi.20745	Putative_R-Genes,_predicted_from_NCBI_UniGene	Vitis vinifera	CNL	225447515	XM_002268092	PREDICTED: Vitis vinifera hypothetical protein LOC100252764 (LOC100252764), mRNA
Ghir_A06G012130.1	PRGDB00078970	43.4	129	72	1	506	892	1109	1236	3.8e-21	103.6	Vvi.20745	Putative_R-Genes,_predicted_from_NCBI_UniGene	Vitis vinifera	CNL	225447515	XM_002268092	PREDICTED: Vitis vinifera hypothetical protein LOC100252764 (LOC100252764), mRNA
Ghir_A06G012210	PRGDB00188191	90.1	607	60	0	565	2385	21	627	0	1087.8	Ghi.12535	Putative_R-Genes,_predicted_from_NCBI_UniGene	Gossypium hirsutum	RLP	312618974	HQ621831	Gossypium hirsutum somatic embryogenesis receptor-like kinase 1 protein (SERK1) mRNA, complete cds
Ghir_A06G012220	PRGDB00216326	30.3	165	112	3	287	775	808	971	6.9e-14	79	MDP0000255780	Putative_R-Genes,_predicted_from_Pythozome	Malus x domestica	RLP
Ghir_A06G012220.2	PRGDB00216326	30.3	165	112	3	287	775	808	971	6.9e-14	79	MDP0000255780	Putative_R-Genes,_predicted_from_Pythozome	Malus x domestica	RLP
Ghir_A06G012400	PRGDB00143781	80	35	7	0	1072	1176	169	203	8.6e-09	62	356572	Putative_R-Genes,_predicted_from_Pythozome	Arabidopsis lyrata	T			Disease resistance protein (TIR-NBS-LRR class) family (best arabidopsis hit)
Ghir_A06G012850	PRGDB00148853	44.2	721	311	16	16	2052	4	675	3.4e-149	528.5	clementine0.9_004201m	Putative_R-Genes,_predicted_from_Pythozome	Citrus clementina	RLK-GNK2			cysteine-rich RLK (RECEPTOR-like protein kinase) 10 (best arabidopsis hit)
Ghir_A06G012860.1	PRGDB00183001	74.2	221	57	0	1284	1946	349	569	3.9e-91	335.9	GSVIVT01006683001	Putative_R-Genes,_predicted_from_Pythozome	Vitis vinifera	RLK-GNK2			cysteine-rich RLK (RECEPTOR-like protein kinase) 29 (best arabidopsis hit)
Ghir_A06G012870	PRGDB00157082	55.3	653	271	6	252	2192	14	651	2.5e-204	711.8	orange1.1g006317m	Putative_R-Genes,_predicted_from_Pythozome	Citrus sinensis	RLK-GNK2			cysteine-rich RLK (RECEPTOR-like protein kinase) 14 (best arabidopsis hit)
Ghir_A06G012870.1	PRGDB00157082	55.3	653	271	6	104	2044	14	651	2.4e-204	711.8	orange1.1g006317m	Putative_R-Genes,_predicted_from_Pythozome	Citrus sinensis	RLK-GNK2			cysteine-rich RLK (RECEPTOR-like protein kinase) 14 (best arabidopsis hit)
Ghir_A06G012880.1	PRGDB00147639	67.8	379	120	1	703	1833	256	634	2.3e-143	509.2	clementine0.9_004898m	Putative_R-Genes,_predicted_from_Pythozome	Citrus clementina	RLK-GNK2			cysteine-rich RLK (RECEPTOR-like protein kinase) 10 (best arabidopsis hit)
Ghir_A06G012900	PRGDB00148813	47.8	550	239	8	88	1656	28	556	3.4e-135	481.9	clementine0.9_004435m	Putative_R-Genes,_predicted_from_Pythozome	Citrus clementina	RLK-GNK2			cysteine-rich RLK (RECEPTOR-like protein kinase) 14 (best arabidopsis hit)
Ghir_A06G012920	PRGDB00150626	57.1	643	256	3	442	2349	30	659	3.5e-212	738	evm.model.supercontig_81.14	Putative_R-Genes,_predicted_from_Pythozome	Arabidopsis lyrata subsp. lyrata	RLK-GNK2			cysteine-rich RLK (RECEPTOR-like protein kinase) 29 (best arabidopsis hit)
Ghir_A06G012950	PRGDB00213057	25.6	227	156	3	2437	1769	1257	1474	6.1e-16	86.3	MDP0000278168	Putative_R-Genes,_predicted_from_Pythozome	Malus x domestica	TNL
Ghir_A06G013030	PRGDB00164254	53.1	113	50	2	6930	7259	353	465	1.2e-21	106.7	cassava4.1_001224m	Putative_R-Genes,_predicted_from_Pythozome	Vitis aestivalis	RLP			Leucine-rich repeat protein kinase family protein (best arabidopsis hit)
Ghir_A06G013030.1	PRGDB00164254	53.1	113	50	2	6927	7256	353	465	1.2e-21	106.7	cassava4.1_001224m	Putative_R-Genes,_predicted_from_Pythozome	Vitis aestivalis	RLP			Leucine-rich repeat protein kinase family protein (best arabidopsis hit)
Ghir_A06G013400.1	PRGDB00148824	64.8	543	159	7	1619	3163	287	825	1.4e-197	689.9	clementine0.9_032308m	Putative_R-Genes,_predicted_from_Pythozome	Citrus clementina	RLP			receptor-like kinase in flowers 1 (best arabidopsis hit)
Ghir_A06G013600	PRGDB00211657	71.1	45	13	0	231	365	670	714	5.7e-13	75.1	Eucgr.H02157.1	Putative_R-Genes,_predicted_from_Pythozome	Eucalyptus grandis	TNL
Ghir_A06G013640	PRGDB00190291	21.5	242	182	2	1147	1854	391	630	2.5e-08	60.8	Lsa.16797	Putative_R-Genes,_predicted_from_NCBI_UniGene	Lactuca sativa	N	329676902	JI579408	TSA: Lactuca sativa Letassy_X1_5504 mRNA sequence
Ghir_A06G014190	PRGDB00148801	66.1	681	216	9	428	2428	10	689	8.3e-250	863.2	clementine0.9_003985m	Putative_R-Genes,_predicted_from_Pythozome	Citrus clementina	RLP			Leucine-rich repeat protein kinase family protein (best arabidopsis hit)
Ghir_A06G014280	PRGDB00202169	42.5	212	107	3	321	929	7	212	6.2e-38	158.3	Bra007015	Putative_R-Genes,_predicted_from_Pythozome	Brassica rapa	RLP
Ghir_A06G014350	PRGDB00191296	40.8	228	129	5	1787	2464	257	480	6.8e-29	129.4	Lsa.44031	Putative_R-Genes,_predicted_from_NCBI_UniGene	Lactuca sativa	N	329679120	JI581626	TSA: Lactuca sativa CLC_LTR_V1A_17001 mRNA sequence
Ghir_A06G014580	PRGDB00070731	48.5	68	32	2	343	540	17	83	1.4e-09	63.9	Mdo.689	Putative_R-Genes,_predicted_from_NCBI_UniGene	Malus x domestica	T	292668962	GU732467	Malus x domestica AP2 domain class transcription factor (AP2D43) mRNA, complete cds
Ghir_A06G014620	PRGDB00213930	39.9	351	161	8	210	1151	1	338	3.8e-50	199.1	MDP0000283542	Putative_R-Genes,_predicted_from_Pythozome	Malus x domestica	CNL
Ghir_A06G014980	PRGDB00146828	28.9	325	198	9	679	1560	82	404	3.2e-29	130.2	Bradi3g17760.2	Putative_R-Genes,_predicted_from_Pythozome	Ricinus communis	RLP			Pyridoxal phosphate (PLP)-dependent transferases superfamily protein (best arabidopsis hit); SHR5-receptor-like kinase, putative (best rice hit)
Ghir_A06G015150	PRGDB00181635	36.7	139	85	3	127	537	5	142	3.5e-21	102.8	Si025833m	Putative_R-Genes,_predicted_from_Pythozome	Setaria italica	NL			NAC domain containing protein 90 (best arabidopsis hit); NBS-LRR disease resistance protein, putative, expressed (best rice hit)
Ghir_A06G015190	PRGDB00202169	41.5	123	72	0	315	683	17	139	7.6e-25	115.2	Bra007015	Putative_R-Genes,_predicted_from_Pythozome	Brassica rapa	RLP
Ghir_A06G015410	PRGDB00078682	46.4	56	30	0	302	469	793	848	1.9e-09	63.2	Vvi.8276	Putative_R-Genes,_predicted_from_NCBI_UniGene	Vitis vinifera	NL	225452519	XM_002275052	PREDICTED: Vitis vinifera hypothetical protein LOC100250803 (LOC100250803), mRNA
Ghir_A06G015610	PRGDB00215095	36.9	563	303	13	66	1715	4	527	2.1e-90	333.2	MDP0000319352	Putative_R-Genes,_predicted_from_Pythozome	Malus x domestica	TNL
Ghir_A06G015710	PRGDB00148853	50.3	678	317	8	423	2420	6	675	1.9e-181	636	clementine0.9_004201m	Putative_R-Genes,_predicted_from_Pythozome	Citrus clementina	RLK-GNK2			cysteine-rich RLK (RECEPTOR-like protein kinase) 10 (best arabidopsis hit)
Ghir_A06G015720	PRGDB00201543	43.9	1359	631	24	7	3909	21	1305	3.7e-306	1050.8	Bra013681	Putative_R-Genes,_predicted_from_Pythozome	Brassica rapa	RLK-GNK2
Ghir_A06G016290	PRGDB00166311	77.1	690	147	3	406	2442	38	727	7.7e-303	1039.3	cassava4.1_002481m	Putative_R-Genes,_predicted_from_Pythozome	Vitis aestivalis	RLP			STRUBBELIG-receptor family 8 (best arabidopsis hit)
Ghir_A06G016290.1	PRGDB00166311	77	543	114	3	1224	2819	185	727	1.2e-232	806.2	cassava4.1_002481m	Putative_R-Genes,_predicted_from_Pythozome	Vitis aestivalis	RLP			STRUBBELIG-receptor family 8 (best arabidopsis hit)
Ghir_A06G016630	PRGDB00216122	27.9	398	244	14	187	1296	9	391	2.2e-19	97.4	MDP0000283975	Putative_R-Genes,_predicted_from_Pythozome	Malus x domestica	RLK
Ghir_A06G016650	PRGDB00186455	41.7	96	43	4	112	363	806	900	1.2e-09	62.4		Putative_R-Genes,_collected_from_NCBI_Protein	Medicago truncatula	NL	357518542	XM_003629512	Medicago truncatula Disease resistance protein (MTR_8g079450) mRNA, complete cds.
Ghir_A06G016680	PRGDB00191296	40.4	240	143	0	913	1632	279	518	1.7e-41	171	Lsa.44031	Putative_R-Genes,_predicted_from_NCBI_UniGene	Lactuca sativa	N	329679120	JI581626	TSA: Lactuca sativa CLC_LTR_V1A_17001 mRNA sequence
Ghir_A06G017180	PRGDB00205572	61.3	186	63	4	145	687	852	1033	4.5e-51	201.8	Lus10010223	Putative_R-Genes,_predicted_from_Pythozome	Linum usitatissimum	NL
Ghir_A06G017260	PRGDB00184231	56.7	203	87	1	445	1050	93	295	7.6e-55	214.5	GSVIVT01032740001	Putative_R-Genes,_predicted_from_Pythozome	Vitis vinifera	RLP			inflorescence meristem receptor-like kinase 2 (best arabidopsis hit)
Ghir_A06G017270	PRGDB00078963	68	820	246	4	436	2865	37	850	4.3e-311	1067	Vvi.20478	Putative_R-Genes,_predicted_from_NCBI_UniGene	Vitis vinifera	RLP	225448571	XM_002277893	PREDICTED: Vitis vinifera hypothetical protein LOC100246700, transcript variant 1 (LOC100246700), mRNA
Ghir_A06G017440	PRGDB00188817	53.4	579	250	5	361	2088	31	592	7.8e-164	577.4	Gma.44875	Putative_R-Genes,_predicted_from_NCBI_UniGene	Glycine max	RLP	356569291	XM_003552789	PREDICTED: Glycine max probable LRR receptor-like serine
Ghir_A06G017690	PRGWK00001610	48.3	60	31	0	3251	3430	75	134	5.2e-11	70.5	Sotub04g029700.1.1	Contributed_R-Genes	Solanum tuberosum	RLP
Ghir_A06G017690.1	PRGWK00001610	48.3	60	31	0	5202	5381	75	134	8.9e-11	70.5	Sotub04g029700.1.1	Contributed_R-Genes	Solanum tuberosum	RLP
Ghir_A06G017900	PRGDB00201227	44.7	94	50	2	1029	1310	966	1057	6.2e-13	76.6	Bra026094	Putative_R-Genes,_predicted_from_Pythozome	Brassica rapa	CNL
Ghir_A06G017910	PRGDB00201227	42.1	629	338	10	174	2006	992	1612	2.5e-132	472.6	Bra026094	Putative_R-Genes,_predicted_from_Pythozome	Brassica rapa	CNL
Ghir_A06G018020	PRGDB00167710	83.2	393	64	1	133	1311	878	1268	3.7e-181	635.2	Medtr2g047020.1	Putative_R-Genes,_predicted_from_Pythozome	Medicago truncatula	TNL			heat shock cognate protein 70-1 (best arabidopsis hit)
Ghir_A06G018260	PRGDB00189838	54	326	141	3	650	1624	1251	1568	1.3e-93	344	Hv.34616	Putative_R-Genes,_predicted_from_NCBI_UniGene	Hordeum vulgare	NL	326530114	AK377143	Hordeum vulgare subsp. vulgare mRNA for predicted protein, partial cds, clone: NIASHv3149K09
Ghir_A06G018280	PRGDB00201997	51.1	450	149	8	1	1137	69	518	6.7e-119	427.2	Bra031763	Putative_R-Genes,_predicted_from_Pythozome	Brassica rapa	Mlo-like
Ghir_A06G018280.1	PRGDB00150471	59.1	296	117	2	763	1650	58	349	4.9e-97	355.1	evm.model.supercontig_53.58	Putative_R-Genes,_predicted_from_Pythozome	Arabidopsis lyrata subsp. lyrata	Mlo-like			Seven transmembrane MLO family protein (best arabidopsis hit)
Ghir_A06G018550	PRGDB00187911	38.8	330	178	5	52	1017	887	1200	8.8e-59	227.3	Ta.74193	Putative_R-Genes,_predicted_from_NCBI_UniGene	Triticum aestivum	RLP	241988090	AK335347	Triticum aestivum cDNA, clone: WT012_K21, cultivar: Chinese Spring
Ghir_A06G018610	PRGDB00062401	44.2	1465	656	32	217	4440	13	1372	8.4e-295	1013.4	cc-nbs-lrr resistance protein	Putative_R-Genes,_collected_from_NCBI_Protein	Populus trichocarpa	NL	116047841	CM000337	Populus trichocarpa linkage group I, whole genome shotgun sequence.
Ghir_A06G018620	PRGDB00176906	52.8	771	355	6	61	2367	1	764	4.5e-222	771.9	29852.m002013	Putative_R-Genes,_predicted_from_Pythozome	Oryza barthii	RLP			Leucine-rich repeat protein kinase family protein (best arabidopsis hit)
Ghir_A06G018820	PRGDB00167710	33.5	218	131	3	693	1346	1388	1591	5e-30	133.3	Medtr2g047020.1	Putative_R-Genes,_predicted_from_Pythozome	Medicago truncatula	TNL			heat shock cognate protein 70-1 (best arabidopsis hit)
Ghir_A06G019080	PRGDB00078682	43.8	73	39	1	459	677	780	850	7.3e-13	74.3	Vvi.8276	Putative_R-Genes,_predicted_from_NCBI_UniGene	Vitis vinifera	NL	225452519	XM_002275052	PREDICTED: Vitis vinifera hypothetical protein LOC100250803 (LOC100250803), mRNA
Ghir_A06G019210	PRGDB00201821	38.5	130	79	1	562	951	955	1083	3.8e-19	96.7	Bra012540	Putative_R-Genes,_predicted_from_Pythozome	Brassica rapa	TNL
Ghir_A06G019250	PRGDB00215095	28.3	460	295	11	863	2236	117	543	3.3e-42	173.3	MDP0000319352	Putative_R-Genes,_predicted_from_Pythozome	Malus x domestica	TNL
Ghir_A06G019330	PRGDB00078689	69.9	957	285	2	434	3304	13	966	0	1317	Vvi.8428	Putative_R-Genes,_predicted_from_NCBI_UniGene	Vitis vinifera	RLP	225448702	XM_002275239	PREDICTED: Vitis vinifera hypothetical protein LOC100257029 (LOC100257029), mRNA
Ghir_A06G019350	PRGDB00215055	35.7	143	73	4	487	873	753	890	1.4e-15	83.6	MDP0000248164	Putative_R-Genes,_predicted_from_Pythozome	Malus x domestica	NL
Ghir_A06G019420	PRGDB00181917	35.5	110	62	3	595	900	1130	1238	7.5e-14	78.2	Si028710m	Putative_R-Genes,_predicted_from_Pythozome	Setaria italica	NL			NB-ARC domain-containing disease resistance protein (best arabidopsis hit); RGH2B, putative, expressed (best rice hit)
Ghir_A06G019480	PRGDB00175437	62.9	626	201	7	197	1999	37	656	4e-217	754.2	POPTR_0019s09010.1	Putative_R-Genes,_predicted_from_Pythozome	Populus trichocarpa	RLP			Leucine-rich repeat protein kinase family protein (best arabidopsis hit)
Ghir_A06G019920.1	PRGDB00160871	49.3	505	247	4	168	1670	1	500	1.6e-136	486.9	cassava4.1_001427m	Putative_R-Genes,_predicted_from_Pythozome	Vitis aestivalis	CNL			Disease resistance protein (CC-NBS-LRR class) family (best arabidopsis hit)
Ghir_A06G019980	PRGDB00154046	46.1	903	463	12	318	2996	1	889	1.6e-214	746.1	orange1.1g002704m	Putative_R-Genes,_predicted_from_Pythozome	Citrus sinensis	CNL			Disease resistance protein (CC-NBS-LRR class) family (best arabidopsis hit)
Ghir_A06G019990	PRGDB00149721	46.8	898	447	9	295	2967	1	874	3.2e-220	765	clementine0.9_035962m	Putative_R-Genes,_predicted_from_Pythozome	Citrus clementina	NL			Disease resistance protein (CC-NBS-LRR class) family (best arabidopsis hit)
Ghir_A06G020270	PRGDB00172736	56.4	303	127	4	58	954	198	499	3.3e-89	328.2	ppa001182m	Putative_R-Genes,_predicted_from_Pythozome	Prunus persica	CNL			Disease resistance protein (CC-NBS-LRR class) family (best arabidopsis hit)
Ghir_A06G020330	PRGDB00156657	41.3	143	42	6	716	1027	145	284	2.1e-15	83.6	Glyma03g23250.1	Putative_R-Genes,_predicted_from_Pythozome	Glycine max	T			GATA transcription factor 2 (best arabidopsis hit)
Ghir_A06G020580	PRGDB00154044	54.3	35	16	0	2686	2790	751	785	0.023	41.2	orange1.1g002659m	Putative_R-Genes,_predicted_from_Pythozome	Citrus sinensis	CNL			Disease resistance protein (CC-NBS-LRR class) family (best arabidopsis hit)
Ghir_A06G020580.1	PRGDB00149626	40.9	110	63	1	2960	3289	754	861	2.4e-11	71.2	clementine0.9_001938m	Putative_R-Genes,_predicted_from_Pythozome	Citrus clementina	CNL			Disease resistance protein (CC-NBS-LRR class) family (best arabidopsis hit)
Ghir_A06G020910	PRGDB00182255	31.2	176	85	7	568	1089	1528	1669	1.6e-10	67.4	441722	Putative_R-Genes,_predicted_from_Pythozome	Selaginella moellendorffii	N			pleiotropic drug resistance 12 (best arabidopsis hit)
Ghir_A06G021480	PRGDB00216446	47.3	93	47	1	31	303	915	1007	1e-22	107.8	MDP0000196862	Putative_R-Genes,_predicted_from_Pythozome	Malus x domestica	RLP
Ghir_A06G021480.1	PRGDB00216650	52.4	21	10	0	1878	1940	1070	1090	5	33.9	MDP0000252094	Putative_R-Genes,_predicted_from_Pythozome	Malus x domestica	RLP
Ghir_A06G021560	PRGDB00202169	56.3	126	55	0	253	630	7	132	4.5e-36	151.8	Bra007015	Putative_R-Genes,_predicted_from_Pythozome	Brassica rapa	RLP
Ghir_A06G021640	PRGDB00070731	55.6	81	36	0	88	330	7	87	4.2e-18	92	Mdo.689	Putative_R-Genes,_predicted_from_NCBI_UniGene	Malus x domestica	T	292668962	GU732467	Malus x domestica AP2 domain class transcription factor (AP2D43) mRNA, complete cds
Ghir_A06G021770	PRGDB00182255	26.7	180	91	4	683	1222	1548	1686	7.9e-06	52.4	441722	Putative_R-Genes,_predicted_from_Pythozome	Selaginella moellendorffii	N			pleiotropic drug resistance 12 (best arabidopsis hit)
Ghir_A06G021790.1	PRGDB00217007	58.6	128	53	0	363	746	113	240	7.9e-34	144.8	MDP0000579910	Putative_R-Genes,_predicted_from_Pythozome	Malus x domestica	RLP
Ghir_A06G021840	PRGDB00216326	56.1	652	225	12	563	2443	710	1325	3.4e-192	672.2	MDP0000255780	Putative_R-Genes,_predicted_from_Pythozome	Malus x domestica	RLP
Ghir_A06G021930	PRGDB00079067	48.6	74	35	2	152	370	934	1005	3.1e-13	77	Vvi.24747	Putative_R-Genes,_predicted_from_NCBI_UniGene	Vitis vinifera	NL	225424433	XM_002281516	PREDICTED: Vitis vinifera hypothetical protein LOC100249092 (LOC100249092), mRNA
Ghir_A06G021960	PRGDB00172968	62.9	641	230	6	286	2199	29	664	3.3e-234	811.2	ppa002516m	Putative_R-Genes,_predicted_from_Pythozome	Prunus persica	RLK-GNK2			cysteine-rich RLK (RECEPTOR-like protein kinase) 25 (best arabidopsis hit)
Ghir_A06G022100	PRGDB00206435	67.7	99	31	1	436	729	770	868	1.5e-30	133.7	Lus10015549	Putative_R-Genes,_predicted_from_Pythozome	Linum usitatissimum	RLP
Ghir_A06G022110	PRGDB00206435	67.7	99	31	1	370	663	770	868	1.4e-30	133.7	Lus10015549	Putative_R-Genes,_predicted_from_Pythozome	Linum usitatissimum	RLP
Ghir_A06G022120	PRGDB00206435	67.7	99	31	1	202	495	770	868	1.3e-30	133.7	Lus10015549	Putative_R-Genes,_predicted_from_Pythozome	Linum usitatissimum	RLP
Ghir_A06G022440	PRGDB00165191	35	137	87	2	466	876	814	948	3.4e-20	99.8	mgv1a000858m	Putative_R-Genes,_predicted_from_Pythozome	Cucumis x hytivus	NL			NB-ARC domain-containing disease resistance protein (best arabidopsis hit)
Ghir_A06G022470	PRGDB00216033	79.6	186	32	3	1593	2138	1	184	3.2e-82	306.2	MDP0000314577	Putative_R-Genes,_predicted_from_Pythozome	Malus x domestica	RLP
Ghir_A06G022470.2	PRGDB00216033	79.6	186	32	3	1376	1921	1	184	3e-82	306.2	MDP0000314577	Putative_R-Genes,_predicted_from_Pythozome	Malus x domestica	RLP
Ghir_A06G022630	PRGDB00165191	32.9	167	97	3	697	1194	797	949	9.5e-18	91.3	mgv1a000858m	Putative_R-Genes,_predicted_from_Pythozome	Cucumis x hytivus	NL			NB-ARC domain-containing disease resistance protein (best arabidopsis hit)
Ghir_A06G022790	PRGDB00049809	31.2	314	191	8	333	1265	370	661	3.9e-29	129.4	WRKY19	Putative_R-Genes,_collected_from_NCBI_Protein	Arabidopsis thaliana	TNL	186511686	NM_001125496	Arabidopsis thaliana WRKY19 (WRKY DNA-binding protein 19) (WRKY19) mRNA, complete cds.
Ghir_A06G022820	PRGDB00186455	41.4	87	44	2	328	567	806	892	2e-09	62.8		Putative_R-Genes,_collected_from_NCBI_Protein	Medicago truncatula	NL	357518542	XM_003629512	Medicago truncatula Disease resistance protein (MTR_8g079450) mRNA, complete cds.
Ghir_A06G022970	PRGDB00070731	52.4	84	40	0	939	1190	3	86	2e-17	90.9	Mdo.689	Putative_R-Genes,_predicted_from_NCBI_UniGene	Malus x domestica	T	292668962	GU732467	Malus x domestica AP2 domain class transcription factor (AP2D43) mRNA, complete cds
Ghir_A07G000310	PRGDB00183040	48.9	47	23	1	1046	1183	604	650	4.7e-08	59.3	GSVIVT01007793001	Putative_R-Genes,_predicted_from_Pythozome	Vitis vinifera	NL			RING/U-box superfamily protein (best arabidopsis hit)
Ghir_A07G000420	PRGDB00200844	35.8	53	34	0	784	942	66	118	2.2	35.8	Bra008427	Putative_R-Genes,_predicted_from_Pythozome	Brassica rapa	RLP
Ghir_A07G000420.2	PRGDB00200844	35.8	53	34	0	712	870	66	118	2.1	35.8	Bra008427	Putative_R-Genes,_predicted_from_Pythozome	Brassica rapa	RLP
Ghir_A07G000680	PRGDB00202169	38.5	122	75	0	286	651	17	138	2.1e-21	103.2	Bra007015	Putative_R-Genes,_predicted_from_Pythozome	Brassica rapa	RLP
Ghir_A07G000810	PRGDB00070731	43.6	94	45	2	344	601	2	95	5.8e-14	78.6	Mdo.689	Putative_R-Genes,_predicted_from_NCBI_UniGene	Malus x domestica	T	292668962	GU732467	Malus x domestica AP2 domain class transcription factor (AP2D43) mRNA, complete cds
Ghir_A07G001060	PRGDB00201252	43.2	81	46	0	545	787	849	929	5.6e-09	63.5	Bra018936	Putative_R-Genes,_predicted_from_Pythozome	Brassica rapa	RLP
Ghir_A07G001420	PRGDB00216326	28.1	235	150	5	461	1165	752	967	1.3e-16	87.4	MDP0000255780	Putative_R-Genes,_predicted_from_Pythozome	Malus x domestica	RLP
Ghir_A07G001450	PRGDB00177064	48.7	156	72	4	2140	1682	309	459	2.9e-33	143.7	29912.m005281	Putative_R-Genes,_predicted_from_Pythozome	Oryza barthii	N			Flavin-binding monooxygenase family protein (best arabidopsis hit)
Ghir_A07G001570	PRGDB00182795	37.5	168	100	3	2532	2044	1082	1249	1.3e-22	108.6	GSVIVT01000058001	Putative_R-Genes,_predicted_from_Pythozome	Vitis vinifera	RLP			Leucine-rich repeat protein kinase family protein (best arabidopsis hit)
Ghir_A07G001620	PRGDB00216650	26.3	437	245	13	381	1652	872	1244	3e-34	146.7	MDP0000252094	Putative_R-Genes,_predicted_from_Pythozome	Malus x domestica	RLP
Ghir_A07G001690	PRGDB00070731	29.7	175	115	3	174	686	25	195	7.9e-14	77.8	Mdo.689	Putative_R-Genes,_predicted_from_NCBI_UniGene	Malus x domestica	T	292668962	GU732467	Malus x domestica AP2 domain class transcription factor (AP2D43) mRNA, complete cds
Ghir_A07G001780	PRGDB00192324	61.2	165	47	3	2316	2804	1124	1273	3e-48	193.7	Mtr.12478	Putative_R-Genes,_predicted_from_NCBI_UniGene	Medicago truncatula	TNL	357500090	XM_003620286	Medicago truncatula Sucrose synthase (MTR_6g081120) mRNA, complete cds
Ghir_A07G001880.1	PRGDB00205261	47.1	289	121	3	1388	2161	882	1169	3e-64	246.5	Lus10035703	Putative_R-Genes,_predicted_from_Pythozome	Linum usitatissimum	RLP
Ghir_A07G001930	PRGDB00070731	52.3	65	31	0	142	336	18	82	1.4e-13	77	Mdo.689	Putative_R-Genes,_predicted_from_NCBI_UniGene	Malus x domestica	T	292668962	GU732467	Malus x domestica AP2 domain class transcription factor (AP2D43) mRNA, complete cds
Ghir_A07G002000	PRGDB00176387	84.9	978	148	0	222	3155	3	980	0	1680.6	29739.m003626	Putative_R-Genes,_predicted_from_Pythozome	Oryza barthii	RLP			Leucine-rich receptor-like protein kinase family protein (best arabidopsis hit)
Ghir_A07G002000.2	PRGDB00176387	84.9	978	148	0	113	3046	3	980	0	1680.6	29739.m003626	Putative_R-Genes,_predicted_from_Pythozome	Oryza barthii	RLP			Leucine-rich receptor-like protein kinase family protein (best arabidopsis hit)
Ghir_A07G002020	PRGDB00073072	26.9	294	179	8	1536	2396	381	645	8e-16	85.9	Os.80143	Putative_R-Genes,_predicted_from_NCBI_UniGene	Oryza sativa Japonica Group	CNL	32975074	AK065056	Oryza sativa Japonica Group cDNA clone:J013001J06, full insert sequence
Ghir_A07G002040	PRGDB00073072	22.9	546	325	19	1500	2945	193	706	8.8e-14	79.7	Os.80143	Putative_R-Genes,_predicted_from_NCBI_UniGene	Oryza sativa Japonica Group	CNL	32975074	AK065056	Oryza sativa Japonica Group cDNA clone:J013001J06, full insert sequence
Ghir_A07G002060	PRGDB00211657	62.7	51	19	0	268	420	670	720	7.6e-13	74.7	Eucgr.H02157.1	Putative_R-Genes,_predicted_from_Pythozome	Eucalyptus grandis	TNL
Ghir_A07G002060.1	PRGDB00211657	62.7	51	19	0	268	420	670	720	6.8e-13	74.7	Eucgr.H02157.1	Putative_R-Genes,_predicted_from_Pythozome	Eucalyptus grandis	TNL
Ghir_A07G002070	PRGDB00211657	68.9	45	14	0	282	416	670	714	2.8e-12	72.8	Eucgr.H02157.1	Putative_R-Genes,_predicted_from_Pythozome	Eucalyptus grandis	TNL
Ghir_A07G002360	PRGDB00215191	51.1	540	207	8	627	2105	697	1226	2.9e-144	512.7	MDP0000254848	Putative_R-Genes,_predicted_from_Pythozome	Malus x domestica	RLK-GNK2
Ghir_A07G002570	PRGDB00175021	59.5	972	381	7	307	3195	21	988	0	1126.7	POPTR_0018s04880.1	Putative_R-Genes,_predicted_from_Pythozome	Populus trichocarpa	RLP			Protein kinase family protein with leucine-rich repeat domain (best arabidopsis hit)
Ghir_A07G002650	PRGDB00152427	63.3	978	337	15	225	3128	2	967	0	1179.9	orange1.1g002105m	Putative_R-Genes,_predicted_from_Pythozome	Citrus sinensis	RLP			Leucine-rich receptor-like protein kinase family protein (best arabidopsis hit)
Ghir_A07G002670	PRGDB00047070	31.7	60	40	1	52	228	1477	1536	0.11	38.1	disease resistance protein (TIR-NBS-LRR class), putative	Putative_R-Genes,_collected_from_NCBI_Protein	Arabidopsis thaliana	TNL	18414202	NM_117515	Arabidopsis thaliana disease resistance protein (TIR-NBS-LRR class), putative (AT4G14370) mRNA, complete cds.
Ghir_A07G002760	PRGDB00216535	67.8	87	25	1	785	1045	71	154	6.8e-25	115.9	MDP0000279752	Putative_R-Genes,_predicted_from_Pythozome	Malus x domestica	N
Ghir_A07G003280	PRGDB00073072	43.5	605	336	3	288	2087	55	658	1.1e-138	493.8	Os.80143	Putative_R-Genes,_predicted_from_NCBI_UniGene	Oryza sativa Japonica Group	CNL	32975074	AK065056	Oryza sativa Japonica Group cDNA clone:J013001J06, full insert sequence
Ghir_A07G003550	PRGDB00070731	40	65	39	0	131	325	18	82	2.9e-07	55.8	Mdo.689	Putative_R-Genes,_predicted_from_NCBI_UniGene	Malus x domestica	T	292668962	GU732467	Malus x domestica AP2 domain class transcription factor (AP2D43) mRNA, complete cds
Ghir_A07G003910	PRGDB00216981	37.7	310	168	8	421	1290	110	414	2.3e-48	193.4	MDP0000297928	Putative_R-Genes,_predicted_from_Pythozome	Malus x domestica	RLP
Ghir_A07G003970	PRGDB00183463	61.6	73	28	0	1298	1080	810	882	3.7e-13	76.3	GSVIVT01017267001	Putative_R-Genes,_predicted_from_Pythozome	Vitis vinifera	NL			LRR and NB-ARC domains-containing disease resistance protein (best arabidopsis hit)
Ghir_A07G004020	PRGDB00216316	28.8	170	119	2	868	1377	188	355	1.1e-12	75.1	MDP0000248430	Putative_R-Genes,_predicted_from_Pythozome	Malus x domestica	N
Ghir_A07G004050	PRGDB00215095	32.6	519	288	11	1094	2611	57	526	1.4e-58	228	MDP0000319352	Putative_R-Genes,_predicted_from_Pythozome	Malus x domestica	TNL
Ghir_A07G004130	PRGDB00073072	47.7	600	297	6	552	2306	61	658	3.4e-150	532.3	Os.80143	Putative_R-Genes,_predicted_from_NCBI_UniGene	Oryza sativa Japonica Group	CNL	32975074	AK065056	Oryza sativa Japonica Group cDNA clone:J013001J06, full insert sequence
Ghir_A07G004280	PRGDB00217736	34.4	154	94	3	533	985	183	332	1.5e-13	78.2	Thhalv10027748m	Putative_R-Genes,_predicted_from_Pythozome	Eutrema halophilum	TNL
Ghir_A07G004360	PRGDB00206562	33.2	244	160	2	4094	4822	495	736	6.5e-34	147.1	Lus10028841	Putative_R-Genes,_predicted_from_Pythozome	Linum usitatissimum	N
Ghir_A07G004370	PRGDB00189912	25.9	286	194	6	1112	1924	197	479	1.2e-20	101.7	Hv.36068	Putative_R-Genes,_predicted_from_NCBI_UniGene	Hordeum vulgare	N	326508777	AK364708	Hordeum vulgare subsp. vulgare mRNA for predicted protein, complete cds, clone: NIASHv2027L24
Ghir_A07G004590	PRGDB00158499	62.8	43	16	0	2367	2495	138	180	1.2e-06	55.5	Glyma06g19410.1	Putative_R-Genes,_predicted_from_Pythozome	Glycine max	TNL			disease resistance protein (TIR-NBS class), putative (best arabidopsis hit)
Ghir_A07G004780	PRGDB00149222	76.1	963	215	5	354	3227	40	992	0	1470.7	evm.model.supercontig_13.290	Putative_R-Genes,_predicted_from_Pythozome	Arabidopsis lyrata subsp. lyrata	RLP			Leucine-rich repeat protein kinase family protein (best arabidopsis hit)
Ghir_A07G004940	PRGDB00070731	66.7	63	20	1	436	624	26	87	3.2e-17	89.4	Mdo.689	Putative_R-Genes,_predicted_from_NCBI_UniGene	Malus x domestica	T	292668962	GU732467	Malus x domestica AP2 domain class transcription factor (AP2D43) mRNA, complete cds
Ghir_A07G004950	PRGDB00070731	35	100	61	2	392	691	26	121	5.2e-07	55.1	Mdo.689	Putative_R-Genes,_predicted_from_NCBI_UniGene	Malus x domestica	T	292668962	GU732467	Malus x domestica AP2 domain class transcription factor (AP2D43) mRNA, complete cds
Ghir_A07G005000	PRGDB00215645	79.3	174	36	0	353	874	432	605	3.2e-73	275.4	MDP0000303549	Putative_R-Genes,_predicted_from_Pythozome	Malus x domestica	NL
Ghir_A07G005000.1	PRGDB00215645	79.3	174	36	0	353	874	432	605	3.1e-73	275.4	MDP0000303549	Putative_R-Genes,_predicted_from_Pythozome	Malus x domestica	NL
Ghir_A07G005100	PRGDB00201825	51.8	56	10	1	762	929	893	931	4.4e-08	58.9	Bra029191	Putative_R-Genes,_predicted_from_Pythozome	Brassica rapa	RLP
Ghir_A07G005270.6	PRGDB00218046	49.6	127	49	3	1279	1629	367	488	3.4e-26	120.9	Thhalv10027276m	Putative_R-Genes,_predicted_from_Pythozome	Eutrema halophilum	TNL
Ghir_A07G005550	PRGDB00165878	72.7	1463	369	7	197	4570	3	1439	0	2138.6	cassava4.1_027677m	Putative_R-Genes,_predicted_from_Pythozome	Vitis aestivalis	N			pleiotropic drug resistance 12 (best arabidopsis hit)
Ghir_A07G005650	PRGDB00176268	69.8	126	31	2	280	639	333	457	7.2e-43	174.5	29656.m000483	Putative_R-Genes,_predicted_from_Pythozome	Oryza barthii	Mlo-like			Seven transmembrane MLO family protein (best arabidopsis hit)
Ghir_A07G005740.1	PRGDB00182255	27.9	190	96	10	4148	4702	1517	1670	3.9e-06	54.7	441722	Putative_R-Genes,_predicted_from_Pythozome	Selaginella moellendorffii	N			pleiotropic drug resistance 12 (best arabidopsis hit)
Ghir_A07G005750	PRGDB00217904	33.1	148	90	3	185	601	179	326	5.3e-13	75.1	Thhalv10018718m	Putative_R-Genes,_predicted_from_Pythozome	Eutrema halophilum	TNL
Ghir_A07G005810	PRGDB00213910	55.4	725	315	6	515	2677	20	740	3.6e-217	755	MDP0000306905	Putative_R-Genes,_predicted_from_Pythozome	Malus x domestica	RLP
Ghir_A07G006060	PRGDB00201109	37.7	289	172	5	116	973	59	342	9.2e-48	191	Bra015449	Putative_R-Genes,_predicted_from_Pythozome	Brassica rapa	RLP
Ghir_A07G006060.1	PRGDB00201109	37.1	224	134	4	177	839	123	342	2.1e-35	149.8	Bra015449	Putative_R-Genes,_predicted_from_Pythozome	Brassica rapa	RLP
Ghir_A07G006120	PRGDB00204561	49.3	75	32	1	433	639	928	1002	1.6e-11	70.5	GRMZM2G431021_T01	Putative_R-Genes,_predicted_from_Pythozome	Zea mays	RLK-GNK2
Ghir_A07G006200	PRGDB00213048	57.8	102	43	0	494	799	61	162	1.4e-26	121.7	MDP0000693116	Putative_R-Genes,_predicted_from_Pythozome	Malus x domestica	RLP
Ghir_A07G006320	PRGDB00183046	62.4	367	132	2	342	1424	597	963	8.1e-125	447.2	GSVIVT01008201001	Putative_R-Genes,_predicted_from_Pythozome	Vitis vinifera	NL			calcium sensing receptor (best arabidopsis hit)
Ghir_A07G006400	PRGDB00159800	46.8	950	470	14	410	3202	3	936	7.4e-236	817.4	Glyma08g12990.1	Putative_R-Genes,_predicted_from_Pythozome	Glycine max	CNL			NB-ARC domain-containing disease resistance protein (best arabidopsis hit)
Ghir_A07G006520	PRGDB00187911	44.5	321	163	8	206	1138	887	1202	3.3e-73	275.4	Ta.74193	Putative_R-Genes,_predicted_from_NCBI_UniGene	Triticum aestivum	RLP	241988090	AK335347	Triticum aestivum cDNA, clone: WT012_K21, cultivar: Chinese Spring
Ghir_A07G006540	PRGDB00062347	37	100	56	3	1169	1465	163	256	1.9e-07	57.4	E3 ligase	Putative_R-Genes,_collected_from_NCBI_Protein	Oryza sativa Japonica Group	N	324029072	HQ123582	Oryza sativa Japonica Group cultivar Taipei 309 E3 ligase (BBI1) gene, complete cds.
Ghir_A07G006600	PRGDB00176311	88.1	696	83	0	180	2267	1	696	0	1231.9	29681.m001373	Putative_R-Genes,_predicted_from_Pythozome	Oryza barthii	N			white-brown complex homolog protein 11 (best arabidopsis hit)
Ghir_A07G006760	PRGDB00216326	27.5	240	150	7	437	1150	747	964	2.5e-18	93.2	MDP0000255780	Putative_R-Genes,_predicted_from_Pythozome	Malus x domestica	RLP
Ghir_A07G006800	PRGDB00213024	53.4	58	26	1	518	688	1162	1219	1.2e-07	57.4	MDP0000195070	Putative_R-Genes,_predicted_from_Pythozome	Malus x domestica	RLP
Ghir_A07G007200	PRGDB00173034	81	600	113	1	458	2254	5	604	6.8e-281	966.5	ppa003105m	Putative_R-Genes,_predicted_from_Pythozome	Prunus persica	RLP			Leucine-rich repeat protein kinase family protein (best arabidopsis hit)
Ghir_A07G007290	PRGDB00211657	56	50	21	1	256	405	670	718	9.1e-10	64.7	Eucgr.H02157.1	Putative_R-Genes,_predicted_from_Pythozome	Eucalyptus grandis	TNL
Ghir_A07G007380	PRGDB00078803	38.5	512	308	5	517	2043	93	600	1e-93	344.4	Vvi.12916	Putative_R-Genes,_predicted_from_NCBI_UniGene	Vitis vinifera	N	225452756	XM_002283015	PREDICTED: Vitis vinifera hypothetical protein LOC100262734 (LOC100262734), mRNA
Ghir_A07G007390	PRGDB00216326	30.7	114	63	2	1811	2152	864	961	6.1e-09	63.2	MDP0000255780	Putative_R-Genes,_predicted_from_Pythozome	Malus x domestica	RLP
Ghir_A07G007490	PRGDB00170879	42	50	28	1	2262	2113	1597	1645	0.024	41.2	Pp1s176_100V6.1	Putative_R-Genes,_predicted_from_Pythozome	Physcomitrella patens	RLP			disease resistance protein (TIR-NBS-LRR class) (best arabidopsis hit)
Ghir_A07G007600.1	PRGDB00068398	94	184	11	0	2125	2676	91	274	3.6e-96	352.8	Ghi.4935	Putative_R-Genes,_predicted_from_NCBI_UniGene	Gossypium hirsutum	RLP	109852453	DW481432	GH_RMIRS_030_G10_R Cotton Normalized Library random primed Gossypium hirsutum cDNA, mRNA sequence
Ghir_A07G007680.1	PRGDB00177734	60.6	831	295	13	2673	5081	649	1475	2.9e-274	945.3	30138.m004038	Putative_R-Genes,_predicted_from_Pythozome	Oryza barthii	N			Protein kinase superfamily protein (best arabidopsis hit)
Ghir_A07G007710.1	PRGDB00215267	87.9	313	38	0	1445	2383	254	566	1.6e-164	580.5	MDP0000256952	Putative_R-Genes,_predicted_from_Pythozome	Malus x domestica	RLP
Ghir_A07G007830	PRGDB00214154	55.7	494	214	3	118	1590	1282	1773	7.3e-160	563.9	MDP0000259421	Putative_R-Genes,_predicted_from_Pythozome	Malus x domestica	N
Ghir_A07G007920	PRGDB00165894	65.7	601	195	4	351	2138	26	620	9.3e-220	763.1	cassava4.1_003708m	Putative_R-Genes,_predicted_from_Pythozome	Vitis aestivalis	RLP			receptor-like kinase 1 (best arabidopsis hit)
Ghir_A07G008060.1	PRGDB00192324	76.5	170	26	1	1472	1981	1118	1273	3.6e-68	259.6	Mtr.12478	Putative_R-Genes,_predicted_from_NCBI_UniGene	Medicago truncatula	TNL	357500090	XM_003620286	Medicago truncatula Sucrose synthase (MTR_6g081120) mRNA, complete cds
Ghir_A07G008340	PRGDB00204891	45.2	124	58	4	1265	1627	1024	1140	2.7e-23	110.2	Lus10020500	Putative_R-Genes,_predicted_from_Pythozome	Linum usitatissimum	RLP
Ghir_A07G008380	PRGDB00191296	32.7	281	182	6	175	1011	243	518	6.7e-22	105.1	Lsa.44031	Putative_R-Genes,_predicted_from_NCBI_UniGene	Lactuca sativa	N	329679120	JI581626	TSA: Lactuca sativa CLC_LTR_V1A_17001 mRNA sequence
Ghir_A07G008430	PRGDB00217737	35.1	154	89	1	227	655	271	424	2.5e-20	99.4	Thhalv10027751m	Putative_R-Genes,_predicted_from_Pythozome	Eutrema halophilum	TNL
Ghir_A07G009700.1	PRGDB00167217	46.2	78	41	1	1979	1746	961	1037	2.9e-14	80.5	mgv1a020513m	Putative_R-Genes,_predicted_from_Pythozome	Cucumis x hytivus	CNL			NB-ARC domain-containing disease resistance protein (best arabidopsis hit)
Ghir_A07G009750	PRGDB00205338	50.6	354	154	6	1898	2914	989	1336	1.1e-80	301.6	Lus10015091	Putative_R-Genes,_predicted_from_Pythozome	Linum usitatissimum	RLK-GNK2
Ghir_A07G010340	PRGDB00204808	70.1	97	28	1	272	562	1649	1744	2e-28	127.1	GRMZM2G060054_T03	Putative_R-Genes,_predicted_from_Pythozome	Zea mays	CNL
Ghir_A07G010530	PRGDB00141790	25.6	223	150	5	259	885	27	247	6.6e-14	78.6	AcoGoldSmith_v1.015706m	Putative_R-Genes,_predicted_from_Pythozome	Gossypium arboreum	RLK-GNK2			cysteine-rich RLK (RECEPTOR-like protein kinase) 25 (best arabidopsis hit)
Ghir_A07G010540	PRGDB00191296	60.6	302	118	1	1364	2266	222	523	1.1e-94	347.8	Lsa.44031	Putative_R-Genes,_predicted_from_NCBI_UniGene	Lactuca sativa	N	329679120	JI581626	TSA: Lactuca sativa CLC_LTR_V1A_17001 mRNA sequence
Ghir_A07G010600	PRGDB00049789	71.4	126	33	2	978	1346	1	126	1e-42	174.9	putative RING zinc finger ankyrin protein	Putative_R-Genes,_collected_from_NCBI_Protein	Sorghum bicolor	N	190688725	EU810765	Sorghum bicolor clone BAC Sbb12448, complete sequence.
Ghir_A07G010790	PRGDB00201131	85.3	680	99	1	307	2346	134	812	0	1194.5	Bra018196	Putative_R-Genes,_predicted_from_Pythozome	Brassica rapa	NL
Ghir_A07G011050	PRGDB00214816	44.3	79	28	1	920	1108	1	79	7.3e-10	65.9	MDP0000171887	Putative_R-Genes,_predicted_from_Pythozome	Malus x domestica	CNL
Ghir_A07G011160	PRGDB00149040	73.7	1432	367	6	24	4316	8	1431	0	2146.3	evm.model.supercontig_112.27	Putative_R-Genes,_predicted_from_Pythozome	Arabidopsis lyrata subsp. lyrata	N			pleiotropic drug resistance 3 (best arabidopsis hit)
Ghir_A07G011420	PRGDB00170967	43.2	88	49	1	1671	1931	696	783	4.7e-12	73.6	LOC_Os07g14820.1	Putative_R-Genes,_predicted_from_Pythozome	Oryza sativa	RLP			Leucine-rich repeat protein kinase family protein (best arabidopsis hit)
Ghir_A07G011600.1	PRGDB00217154	52.8	72	34	0	1902	2117	32	103	6.4e-13	76.3	MDP0000385217	Putative_R-Genes,_predicted_from_Pythozome	Malus x domestica	RLP
Ghir_A07G011670	PRGDB00182255	29.8	191	90	11	660	1214	1525	1677	6.2e-07	55.8	441722	Putative_R-Genes,_predicted_from_Pythozome	Selaginella moellendorffii	N			pleiotropic drug resistance 12 (best arabidopsis hit)
Ghir_A07G011830	PRGDB00181635	50.3	181	89	1	296	835	11	191	9.2e-47	187.2	Si025833m	Putative_R-Genes,_predicted_from_Pythozome	Setaria italica	NL			NAC domain containing protein 90 (best arabidopsis hit); NBS-LRR disease resistance protein, putative, expressed (best rice hit)
Ghir_A07G012040	PRGDB00148703	69.7	975	282	4	697	3588	2	974	0	1340.1	clementine0.9_001500m	Putative_R-Genes,_predicted_from_Pythozome	Citrus clementina	RLP			transmembrane kinase 1 (best arabidopsis hit)
Ghir_A07G012230	PRGDB00217736	43.5	168	76	2	117	563	170	337	3.5e-29	129	Thhalv10027748m	Putative_R-Genes,_predicted_from_Pythozome	Eutrema halophilum	TNL
Ghir_A07G012500	PRGDB00174096	66.2	591	188	4	234	1973	1	590	7.6e-227	786.6	ppa003207m	Putative_R-Genes,_predicted_from_Pythozome	Prunus persica	Mlo-like			Seven transmembrane MLO family protein (best arabidopsis hit)
Ghir_A07G012500.1	PRGDB00174096	65.4	356	112	3	1412	2449	236	590	8e-130	464.5	ppa003207m	Putative_R-Genes,_predicted_from_Pythozome	Prunus persica	Mlo-like			Seven transmembrane MLO family protein (best arabidopsis hit)
Ghir_A07G012630.1	PRGDB00184271	87.2	47	5	1	302	442	662	707	5.8e-17	89	GRMZM2G162531_T01	Putative_R-Genes,_predicted_from_Pythozome	Zea mays	RLP			STRUBBELIG-receptor family 8 (best arabidopsis hit); STRUBBELIG-RECEPTOR FAMILY 7 precursor, putative, expressed (best rice hit)
Ghir_A07G012650	PRGDB00183352	24.6	171	122	4	805	1305	1581	1748	1.7e-08	60.8	GSVIVT01015461001	Putative_R-Genes,_predicted_from_Pythozome	Vitis vinifera	N			pleiotropic drug resistance 12 (best arabidopsis hit)
Ghir_A07G013140	PRGDB00183352	32.4	179	118	1	6123	5587	1595	1770	2.6e-19	98.6	GSVIVT01015461001	Putative_R-Genes,_predicted_from_Pythozome	Vitis vinifera	N			pleiotropic drug resistance 12 (best arabidopsis hit)
Ghir_A07G013330	PRGDB00049933	49.6	248	114	4	598	1326	1037	1278	1e-58	227.6	Os10g0370100	Putative_R-Genes,_collected_from_NCBI_Protein	Oryza sativa Japonica Group	NL	115481725	NM_001070991	Oryza sativa (japonica cultivar-group) Os10g0370100 (Os10g0370100) mRNA, complete cds.
Ghir_A07G013400	PRGDB00201668	47.3	110	42	3	298	591	224	329	3.5e-18	93.6	Bra040843	Putative_R-Genes,_predicted_from_Pythozome	Brassica rapa	CNL
Ghir_A07G013810	PRGDB00213421	54.6	304	122	3	226	1131	86	375	5e-89	327.8	MDP0000280399	Putative_R-Genes,_predicted_from_Pythozome	Malus x domestica	RLP
Ghir_A07G013810.1	PRGDB00213421	54.6	304	122	3	960	1865	86	375	8.9e-89	327.8	MDP0000280399	Putative_R-Genes,_predicted_from_Pythozome	Malus x domestica	RLP
Ghir_A07G014070	PRGDB00158056	81.8	291	53	0	2704	3576	793	1083	5.7e-134	478.8	orange1.1g045553m	Putative_R-Genes,_predicted_from_Pythozome	Citrus sinensis	RLP			receptor-like protein kinase 2 (best arabidopsis hit)
Ghir_A07G014140	PRGDB00177091	35	143	86	3	292	705	248	388	1.3e-15	85.9	POPTR_0818s00195.1	Putative_R-Genes,_predicted_from_Pythozome	Populus trichocarpa	T			NAC domain containing protein 17 (best arabidopsis hit)
Ghir_A07G014140.1	PRGDB00177091	38.9	113	64	2	292	621	248	358	2.6e-15	85.1	POPTR_0818s00195.1	Putative_R-Genes,_predicted_from_Pythozome	Populus trichocarpa	T			NAC domain containing protein 17 (best arabidopsis hit)
Ghir_A07G014350	PRGDB00201975	43.6	227	115	3	748	1395	160	384	6.8e-48	192.2	Bra036845	Putative_R-Genes,_predicted_from_Pythozome	Brassica rapa	CNL
Ghir_A07G014390	PRGDB00200912	44.4	81	44	1	1133	1375	711	790	4.4e-12	73.9	Bra022543	Putative_R-Genes,_predicted_from_Pythozome	Brassica rapa	CN
Ghir_A07G014390.1	PRGDB00184089	53	202	95	0	619	14	581	782	1.1e-50	201.8	GSVIVT01029816001	Putative_R-Genes,_predicted_from_Pythozome	Vitis vinifera	RLP			BRI1-associated receptor kinase (best arabidopsis hit)
Ghir_A07G014440	PRGDB00202140	53.3	60	28	0	1519	1698	627	686	6.8e-12	73.2	Bra027791	Putative_R-Genes,_predicted_from_Pythozome	Brassica rapa	TNL
Ghir_A07G014530	PRGDB00184318	60	55	22	0	708	544	811	865	1.5e-07	58.5	GSVIVT01034429001	Putative_R-Genes,_predicted_from_Pythozome	Vitis vinifera	CNL			Disease resistance protein (CC-NBS-LRR class) family (best arabidopsis hit)
Ghir_A07G014640	PRGDB00183352	34.3	824	490	8	359	2824	1189	1963	5e-129	462.2	GSVIVT01015461001	Putative_R-Genes,_predicted_from_Pythozome	Vitis vinifera	N			pleiotropic drug resistance 12 (best arabidopsis hit)
Ghir_A07G014760	PRGDB00061522	28	189	106	7	904	422	120	306	3e-07	57.8	disease resistance protein	Putative_R-Genes,_collected_from_NCBI_Protein	Brassica rapa subsp. pekinensis	NL	227438216	FJ842817	Brassica rapa subsp. pekinensis isolate BrNL12 disease resistance protein gene, complete cds.
Ghir_A07G014790	PRGDB00070731	63.9	61	22	0	346	528	21	81	6.1e-17	88.2	Mdo.689	Putative_R-Genes,_predicted_from_NCBI_UniGene	Malus x domestica	T	292668962	GU732467	Malus x domestica AP2 domain class transcription factor (AP2D43) mRNA, complete cds
Ghir_A07G014830	PRGDB00215055	46.6	73	36	2	378	596	758	827	7.5e-14	78.2	MDP0000248164	Putative_R-Genes,_predicted_from_Pythozome	Malus x domestica	NL
Ghir_A07G014950	PRGDB00186676	59.4	229	31	3	2935	3579	939	1119	1.5e-57	225.3		Putative_R-Genes,_collected_from_NCBI_Protein	Arachis hypogaea	NL	342365827	HQ637178	Arachis hypogaea clone AHF-205D04 NBS-LRR gene cluster, complete sequence.
Ghir_A07G014950.1	PRGDB00186676	59.4	229	31	3	2925	3569	939	1119	1.5e-57	225.3		Putative_R-Genes,_collected_from_NCBI_Protein	Arachis hypogaea	NL	342365827	HQ637178	Arachis hypogaea clone AHF-205D04 NBS-LRR gene cluster, complete sequence.
Ghir_A07G015070	PRGDB00164106	44.8	607	254	13	770	2521	292	840	7.8e-124	444.5	cassava4.1_001671m	Putative_R-Genes,_predicted_from_Pythozome	Vitis aestivalis	CN			U-box domain-containing protein kinase family protein (best arabidopsis hit)
Ghir_A07G015090	PRGDB00158245	67.8	908	265	10	583	3282	1	889	0	1161.4	orange1.1g002719m	Putative_R-Genes,_predicted_from_Pythozome	Citrus sinensis	CN			U-box domain-containing protein kinase family protein (best arabidopsis hit)
Ghir_A07G015090.1	PRGDB00158245	67.8	908	265	10	471	3170	1	889	0	1161.4	orange1.1g002719m	Putative_R-Genes,_predicted_from_Pythozome	Citrus sinensis	CN			U-box domain-containing protein kinase family protein (best arabidopsis hit)
Ghir_A07G015870	PRGDB00211657	58.9	56	22	1	270	437	670	724	3.5e-12	72.4	Eucgr.H02157.1	Putative_R-Genes,_predicted_from_Pythozome	Eucalyptus grandis	TNL
Ghir_A07G015920	PRGDB00190291	46.9	271	143	1	1737	2546	357	627	2.3e-52	207.6	Lsa.16797	Putative_R-Genes,_predicted_from_NCBI_UniGene	Lactuca sativa	N	329676902	JI579408	TSA: Lactuca sativa Letassy_X1_5504 mRNA sequence
Ghir_A07G015930	PRGDB00149355	68.7	131	41	0	787	1179	1446	1576	2.5e-47	189.9	clementine0.9_000252m	Putative_R-Genes,_predicted_from_Pythozome	Citrus clementina	CNL			NB-ARC domain-containing disease resistance protein (best arabidopsis hit)
Ghir_A07G015930.1	PRGDB00149355	68.7	131	41	0	705	1097	1446	1576	2.3e-47	189.9	clementine0.9_000252m	Putative_R-Genes,_predicted_from_Pythozome	Citrus clementina	CNL			NB-ARC domain-containing disease resistance protein (best arabidopsis hit)
Ghir_A07G016260	PRGDB00183987	62.5	520	184	3	473	2029	13	522	2.8e-182	638.6	GSVIVT01028433001	Putative_R-Genes,_predicted_from_Pythozome	Vitis vinifera	RLP			Leucine-rich repeat transmembrane protein kinase family protein (best arabidopsis hit)
Ghir_A07G016320	PRGDB00078803	28.5	253	178	3	4351	5100	334	586	1.9e-23	112.5	Vvi.12916	Putative_R-Genes,_predicted_from_NCBI_UniGene	Vitis vinifera	N	225452756	XM_002283015	PREDICTED: Vitis vinifera hypothetical protein LOC100262734 (LOC100262734), mRNA
Ghir_A07G016340	PRGDB00214154	80.2	491	97	0	199	1671	1284	1774	2.2e-234	811.6	MDP0000259421	Putative_R-Genes,_predicted_from_Pythozome	Malus x domestica	N
Ghir_A07G016700	PRGDB00178201	73.3	870	227	3	168	2765	21	889	0	1269.2	30204.m001755	Putative_R-Genes,_predicted_from_Pythozome	Oryza barthii	RLP			Leucine-rich repeat protein kinase family protein (best arabidopsis hit)
Ghir_A07G017000	PRGDB00201108	40.2	465	244	9	272	1621	911	1356	3e-84	312.8	Bra002153	Putative_R-Genes,_predicted_from_Pythozome	Brassica rapa	TNL
Ghir_A07G017050	PRGDB00202169	51.2	127	62	0	247	627	14	140	1.3e-33	143.7	Bra007015	Putative_R-Genes,_predicted_from_Pythozome	Brassica rapa	RLP
Ghir_A07G017450	PRGDB00191296	32.1	271	178	5	414	1226	266	530	1.3e-22	107.8	Lsa.44031	Putative_R-Genes,_predicted_from_NCBI_UniGene	Lactuca sativa	N	329679120	JI581626	TSA: Lactuca sativa CLC_LTR_V1A_17001 mRNA sequence
Ghir_A07G017680	PRGDB00215095	29.3	556	339	12	476	2107	15	528	2.3e-51	203.8	MDP0000319352	Putative_R-Genes,_predicted_from_Pythozome	Malus x domestica	TNL
Ghir_A07G017990	PRGDB00215267	60.7	725	263	8	197	2356	642	1349	3.9e-238	824.7	MDP0000256952	Putative_R-Genes,_predicted_from_Pythozome	Malus x domestica	RLP
Ghir_A07G018220	PRGDB00064617	57.4	54	23	0	279	440	60	113	1.2e-11	72.4	Zm.143017	Putative_R-Genes,_predicted_from_NCBI_UniGene	Zea mays	RLK	223973790	BT065207	Zea mays full-length cDNA clone ZM_BFb0035I10 mRNA, complete cds
Ghir_A07G018330	PRGDB00078970	77.5	454	99	2	1409	2767	910	1361	2.8e-200	699.1	Vvi.20745	Putative_R-Genes,_predicted_from_NCBI_UniGene	Vitis vinifera	CNL	225447515	XM_002268092	PREDICTED: Vitis vinifera hypothetical protein LOC100252764 (LOC100252764), mRNA
Ghir_A07G018330.1	PRGDB00078970	77.5	454	99	2	1409	2767	910	1361	2.8e-200	699.1	Vvi.20745	Putative_R-Genes,_predicted_from_NCBI_UniGene	Vitis vinifera	CNL	225447515	XM_002268092	PREDICTED: Vitis vinifera hypothetical protein LOC100252764 (LOC100252764), mRNA
Ghir_A07G018490	PRGDB00150261	70	584	163	8	467	2185	1	583	9.2e-230	796.6	clementine0.9_005881m	Putative_R-Genes,_predicted_from_Pythozome	Citrus clementina	Mlo-like			Seven transmembrane MLO family protein (best arabidopsis hit)
Ghir_A07G018650	PRGDB00213796	62.4	386	110	2	1904	3010	699	1066	1.7e-126	454.1	MDP0000223025	Putative_R-Genes,_predicted_from_Pythozome	Malus x domestica	N
Ghir_A07G018790	PRGDB00062544	75.9	54	13	0	907	1068	991	1044	2.4e-16	86.7	cc-nbs-lrr resistance protein	Putative_R-Genes,_collected_from_NCBI_Protein	Populus trichocarpa	NL	116047840	CM000338	Populus trichocarpa linkage group II, whole genome shotgun sequence.
Ghir_A07G018840	PRGDB00150441	69.4	589	170	5	489	2231	42	628	1.3e-225	782.7	clementine0.9_004999m	Putative_R-Genes,_predicted_from_Pythozome	Citrus clementina	RLP			receptor-like kinase 1 (best arabidopsis hit)
Ghir_A07G019940	PRGDB00189912	26.4	337	228	8	634	1593	197	530	5.4e-25	115.5	Hv.36068	Putative_R-Genes,_predicted_from_NCBI_UniGene	Hordeum vulgare	N	326508777	AK364708	Hordeum vulgare subsp. vulgare mRNA for predicted protein, complete cds, clone: NIASHv2027L24
Ghir_A07G020330	PRGDB00065333	46.1	76	30	1	362	589	103	167	1.6e-11	70.5	Aan.68903	Putative_R-Genes,_predicted_from_NCBI_UniGene	Artemisia annua	RLK	259809559	EZ369767	TSA: Artemisia annua strain Uganda Contig3218.Ulm mRNA sequence
Ghir_A07G021090	PRGDB00154829	71.2	598	170	2	469	2256	26	623	4.8e-254	877.1	orange1.1g006982m	Putative_R-Genes,_predicted_from_Pythozome	Citrus sinensis	RLP			BAK1-interacting receptor-like kinase 1 (best arabidopsis hit)
Ghir_A07G021090.1	PRGDB00154829	71.5	583	164	2	275	2017	41	623	9.3e-249	859.4	orange1.1g006982m	Putative_R-Genes,_predicted_from_Pythozome	Citrus sinensis	RLP			BAK1-interacting receptor-like kinase 1 (best arabidopsis hit)
Ghir_A07G021270	PRGDB00202169	35.3	241	113	4	240	848	14	249	1.1e-34	147.1	Bra007015	Putative_R-Genes,_predicted_from_Pythozome	Brassica rapa	RLP
Ghir_A07G021330	PRGDB00201108	27.6	58	42	0	1012	1185	844	901	5.4	33.1	Bra002153	Putative_R-Genes,_predicted_from_Pythozome	Brassica rapa	TNL
Ghir_A07G021460	PRGDB00177091	36	161	85	9	163	624	240	389	2.5e-14	80.1	POPTR_0818s00195.1	Putative_R-Genes,_predicted_from_Pythozome	Populus trichocarpa	T			NAC domain containing protein 17 (best arabidopsis hit)
Ghir_A07G021550	PRGDB00214564	39.8	83	38	4	1038	1265	1238	1315	2.3e-08	60.5	MDP0000295852	Putative_R-Genes,_predicted_from_Pythozome	Malus x domestica	CNL
Ghir_A07G021730.1	PRGDB00213320	46.1	317	119	4	1410	2282	464	754	6.7e-75	282	MDP0000177665	Putative_R-Genes,_predicted_from_Pythozome	Malus x domestica	T
Ghir_A07G022000.1	PRGDB00216326	26.5	196	123	6	879	1466	788	962	2.4e-07	57.8	MDP0000255780	Putative_R-Genes,_predicted_from_Pythozome	Malus x domestica	RLP
Ghir_A07G022130	PRGDB00214578	75.6	78	19	0	198	431	1	78	1.1e-28	128.3	MDP0000311735	Putative_R-Genes,_predicted_from_Pythozome	Malus x domestica	CNL
Ghir_A07G022130.1	PRGDB00214578	75.6	78	19	0	198	431	1	78	1.6e-28	128.3	MDP0000311735	Putative_R-Genes,_predicted_from_Pythozome	Malus x domestica	CNL
Ghir_A07G022180	PRGDB00211657	56	50	22	0	428	577	670	719	5e-10	65.9	Eucgr.H02157.1	Putative_R-Genes,_predicted_from_Pythozome	Eucalyptus grandis	TNL
Ghir_A07G022390	PRGDB00200675	39.2	102	56	3	1432	1737	870	965	1.7e-10	67.8	Bra018448	Putative_R-Genes,_predicted_from_Pythozome	Brassica rapa	CNL
Ghir_A07G022390.1	PRGDB00200675	39.2	102	56	3	1443	1748	870	965	1.8e-10	67.8	Bra018448	Putative_R-Genes,_predicted_from_Pythozome	Brassica rapa	CNL
Ghir_A07G022400	PRGDB00147502	73.4	590	156	1	464	2230	7	596	2.6e-252	871.3	clementine0.9_005605m	Putative_R-Genes,_predicted_from_Pythozome	Citrus clementina	RLP			Leucine-rich repeat protein kinase family protein (best arabidopsis hit)
Ghir_A07G022610	PRGDB00184231	32.3	161	98	2	7	456	115	275	2.5e-14	78.6	GSVIVT01032740001	Putative_R-Genes,_predicted_from_Pythozome	Vitis vinifera	RLP			inflorescence meristem receptor-like kinase 2 (best arabidopsis hit)
Ghir_A07G022800	PRGDB00216085	48.5	200	68	3	1163	1756	1355	1521	1.2e-39	164.9	MDP0000320862	Putative_R-Genes,_predicted_from_Pythozome	Malus x domestica	RLP
Ghir_A07G022950	PRGDB00191296	41.6	274	158	2	1822	2637	245	518	5.7e-47	189.5	Lsa.44031	Putative_R-Genes,_predicted_from_NCBI_UniGene	Lactuca sativa	N	329679120	JI581626	TSA: Lactuca sativa CLC_LTR_V1A_17001 mRNA sequence
Ghir_A07G023100	PRGDB00143781	77.1	35	8	0	942	1046	169	203	7.9e-08	58.9	356572	Putative_R-Genes,_predicted_from_Pythozome	Arabidopsis lyrata	T			Disease resistance protein (TIR-NBS-LRR class) family (best arabidopsis hit)
Ghir_A07G023120	PRGDB00078803	86.9	1247	160	1	434	4165	7	1253	0	2084.3	Vvi.12916	Putative_R-Genes,_predicted_from_NCBI_UniGene	Vitis vinifera	N	225452756	XM_002283015	PREDICTED: Vitis vinifera hypothetical protein LOC100262734 (LOC100262734), mRNA
Ghir_A07G023120.5	PRGDB00078803	87	1155	146	2	655	4107	99	1253	0	1911.3	Vvi.12916	Putative_R-Genes,_predicted_from_NCBI_UniGene	Vitis vinifera	N	225452756	XM_002283015	PREDICTED: Vitis vinifera hypothetical protein LOC100262734 (LOC100262734), mRNA
Ghir_A07G023270	PRGDB00201975	42.2	374	185	3	338	1444	42	389	3.8e-85	315.5	Bra036845	Putative_R-Genes,_predicted_from_Pythozome	Brassica rapa	CNL
Ghir_A07G023290	PRGDB00177261	64.4	585	158	4	327	1931	8	592	3.9e-223	774.2	POPTR_0001s34850.1	Putative_R-Genes,_predicted_from_Pythozome	Populus trichocarpa	RLP			Leucine-rich repeat protein kinase family protein (best arabidopsis hit)
Ghir_A07G023330	PRGDB00201975	43.2	370	176	3	554	1648	42	382	2.8e-85	316.2	Bra036845	Putative_R-Genes,_predicted_from_Pythozome	Brassica rapa	CNL
Ghir_A07G023360.1	PRGDB00078803	31.2	205	96	7	106	591	54	256	2e-14	81.6	Vvi.12916	Putative_R-Genes,_predicted_from_NCBI_UniGene	Vitis vinifera	N	225452756	XM_002283015	PREDICTED: Vitis vinifera hypothetical protein LOC100262734 (LOC100262734), mRNA
Ghir_A07G023440	PRGDB00191296	31.8	211	140	2	1199	1825	321	529	2.6e-22	107.1	Lsa.44031	Putative_R-Genes,_predicted_from_NCBI_UniGene	Lactuca sativa	N	329679120	JI581626	TSA: Lactuca sativa CLC_LTR_V1A_17001 mRNA sequence
Ghir_A07G023510	PRGDB00171284	27.7	155	97	5	212	649	618	766	1.7e-10	67	LOC_Os08g30634.1	Putative_R-Genes,_predicted_from_Pythozome	Oryza sativa	NL			NB-ARC domain-containing disease resistance protein (best arabidopsis hit)
Ghir_A07G024360	PRGDB00192408	25	228	137	5	754	1410	1562	1764	2.7e-12	73.2	Mtr.17858	Putative_R-Genes,_predicted_from_NCBI_UniGene	Medicago truncatula	NL	357472002	XM_003606238	Medicago truncatula NBS resistance protein (MTR_4g055630) mRNA, complete cds
Ghir_A07G024360.1	PRGDB00192408	27.2	213	136	5	893	1504	1562	1764	1.2e-14	81.3	Mtr.17858	Putative_R-Genes,_predicted_from_NCBI_UniGene	Medicago truncatula	NL	357472002	XM_003606238	Medicago truncatula NBS resistance protein (MTR_4g055630) mRNA, complete cds
Ghir_A07G024410.1	PRGDB00147536	64.6	748	257	3	478	2697	1	748	1.1e-271	936	clementine0.9_003001m	Putative_R-Genes,_predicted_from_Pythozome	Citrus clementina	RLP			Leucine-rich repeat protein kinase family protein (best arabidopsis hit)
Ghir_A07G024470	PRGDB00147050	35.1	97	59	2	302	589	583	676	2.3e-07	56.6	Bradi4g07900.1	Putative_R-Genes,_predicted_from_Pythozome	Ricinus communis	NL			NB-ARC domain-containing disease resistance protein (best arabidopsis hit); NB-ARC domain containing disease resistance protein, putative, expressed (best rice hit)
Ghir_A07G024780	PRGDB00171933	43.4	580	311	6	28	1740	691	1262	1.7e-130	466.1	LOC_Os11g27450.1	Putative_R-Genes,_predicted_from_Pythozome	Oryza sativa	NL			RNI-like superfamily protein (best arabidopsis hit)
Ghir_A07G025280	PRGDB00216650	50	56	28	0	319	486	940	995	4.8e-13	76.3	MDP0000252094	Putative_R-Genes,_predicted_from_Pythozome	Malus x domestica	RLP
Ghir_A07G025280.3	PRGDB00216650	38.5	338	170	4	319	1317	940	1244	6e-71	268.9	MDP0000252094	Putative_R-Genes,_predicted_from_Pythozome	Malus x domestica	RLP
Ghir_A08G000360	PRGDB00204808	70.3	101	29	1	216	518	1645	1744	2.7e-30	132.1	GRMZM2G060054_T03	Putative_R-Genes,_predicted_from_Pythozome	Zea mays	CNL
Ghir_A08G000930	PRGDB00182255	30	203	97	12	600	1187	1513	1677	3.4e-07	56.6	441722	Putative_R-Genes,_predicted_from_Pythozome	Selaginella moellendorffii	N			pleiotropic drug resistance 12 (best arabidopsis hit)
Ghir_A08G001160	PRGDB00215267	36.8	258	138	8	2756	3505	309	549	8.9e-35	149.4	MDP0000256952	Putative_R-Genes,_predicted_from_Pythozome	Malus x domestica	RLP
Ghir_A08G001160.2	PRGDB00215267	36.8	258	138	8	3284	4033	309	549	1e-34	149.4	MDP0000256952	Putative_R-Genes,_predicted_from_Pythozome	Malus x domestica	RLP
Ghir_A08G001170	PRGDB00190543	37.5	88	45	1	1466	1729	1124	1201	9.4e-09	62	Lsa.21632	Putative_R-Genes,_predicted_from_NCBI_UniGene	Lactuca sativa	TNL	329671799	JI574305	TSA: Lactuca sativa Letassy_X1_14610 mRNA sequence
Ghir_A08G001210	PRGDB00217738	45.3	159	73	1	150	584	183	341	6.2e-30	131	Thhalv10027802m	Putative_R-Genes,_predicted_from_Pythozome	Eutrema halophilum	TNL
Ghir_A08G001280	PRGWK00002314	53.4	161	69	2	211	693	59	213	1.2e-40	167.2	Sotub11g029390.1.1	Contributed_R-Genes	Solanum tuberosum	CNL
Ghir_A08G001420	PRGDB00143462	40.7	172	64	4	615	1124	861	996	3.9e-22	107.5	493465	Putative_R-Genes,_predicted_from_Pythozome	Arabidopsis lyrata	TNL			Regulator of chromosome condensation (RCC1) family protein (best arabidopsis hit)
Ghir_A08G001780.3	PRGDB00201131	21	409	277	12	1201	2295	325	731	2.8e-07	57.8	Bra018196	Putative_R-Genes,_predicted_from_Pythozome	Brassica rapa	NL
Ghir_A08G001800	PRGDB00062347	30.1	249	157	5	336	1043	15	259	6.1e-23	108.2	E3 ligase	Putative_R-Genes,_collected_from_NCBI_Protein	Oryza sativa Japonica Group	N	324029072	HQ123582	Oryza sativa Japonica Group cultivar Taipei 309 E3 ligase (BBI1) gene, complete cds.
Ghir_A08G001900	PRGDB00213507	30.1	113	67	1	809	1147	147	247	3.5e-07	57.8	MDP0000288100	Putative_R-Genes,_predicted_from_Pythozome	Malus x domestica	NL
Ghir_A08G002510	PRGDB00200674	31.1	164	102	6	1285	1755	15	174	4.9e-07	56.6	Bra005271	Putative_R-Genes,_predicted_from_Pythozome	Brassica rapa	CNL
Ghir_A08G002600	PRGDB00205338	57.1	494	189	8	1743	3173	961	1448	8.5e-140	498	Lus10015091	Putative_R-Genes,_predicted_from_Pythozome	Linum usitatissimum	RLK-GNK2
Ghir_A08G002700	PRGDB00162156	73.2	552	145	3	962	2611	3	553	8.5e-231	800	cassava4.1_004793m	Putative_R-Genes,_predicted_from_Pythozome	Vitis aestivalis	Mlo-like			Seven transmembrane MLO family protein (best arabidopsis hit)
Ghir_A08G002800	PRGDB00067001	58.8	318	131	0	327	1280	46	363	4.6e-100	365.5	At.66955	Putative_R-Genes,_predicted_from_NCBI_UniGene	Arabidopsis thaliana	RPW8-NL	110737162	AK228620	Arabidopsis thaliana mRNA for ADR1, complete cds, clone: RAFL15-45-C23
Ghir_A08G002830	PRGDB00067001	61.6	297	114	0	272	1162	67	363	1.9e-98	360.1	At.66955	Putative_R-Genes,_predicted_from_NCBI_UniGene	Arabidopsis thaliana	RPW8-NL	110737162	AK228620	Arabidopsis thaliana mRNA for ADR1, complete cds, clone: RAFL15-45-C23
Ghir_A08G002960	PRGDB00070731	54.3	70	32	0	64	273	18	87	8.3e-15	80.9	Mdo.689	Putative_R-Genes,_predicted_from_NCBI_UniGene	Malus x domestica	T	292668962	GU732467	Malus x domestica AP2 domain class transcription factor (AP2D43) mRNA, complete cds
Ghir_A08G003170	PRGDB00047385	63.4	484	176	1	2200	3651	1	483	1.6e-181	636.7	NBS type disease resistance protein	Putative_R-Genes,_collected_from_NCBI_Protein	Populus trichocarpa	N	105922962	DQ513233	Populus trichocarpa clone 177919 NBS type disease resistance protein mRNA, complete cds.
Ghir_A08G003430	PRGDB00202169	29	245	133	3	326	937	5	249	9.5e-27	121.3	Bra007015	Putative_R-Genes,_predicted_from_Pythozome	Brassica rapa	RLP
Ghir_A08G003490	PRGDB00182746	71.7	184	52	0	628	1179	1219	1402	9.2e-80	297.7	107342	Putative_R-Genes,_predicted_from_Pythozome	Ectocarpus siliculosus	N			mitogen-activated protein kinase kinase kinase 7 (best arabidopsis hit)
Ghir_A08G003690.1	PRGDB00183040	43.3	60	32	2	3101	2925	588	646	5.9e-08	60.1	GSVIVT01007793001	Putative_R-Genes,_predicted_from_Pythozome	Vitis vinifera	NL			RING/U-box superfamily protein (best arabidopsis hit)
Ghir_A08G003750	PRGDB00078682	41.1	73	42	1	178	396	780	851	1.9e-12	73.2	Vvi.8276	Putative_R-Genes,_predicted_from_NCBI_UniGene	Vitis vinifera	NL	225452519	XM_002275052	PREDICTED: Vitis vinifera hypothetical protein LOC100250803 (LOC100250803), mRNA
Ghir_A08G003760	PRGWK00001094	42.4	85	46	2	889	1140	1	83	3.4e-12	73.6	Solyc12g009740.1.1	Contributed_R-Genes	Solanum lycopersicum	RLP
Ghir_A08G003880	PRGDB00211657	63.6	44	16	0	435	566	670	713	2.1e-11	70.1	Eucgr.H02157.1	Putative_R-Genes,_predicted_from_Pythozome	Eucalyptus grandis	TNL
Ghir_A08G004010	PRGDB00204163	27.1	207	142	2	240	833	36	242	7.9e-19	94.7	Bradi1g12397.1	Putative_R-Genes,_predicted_from_Pythozome	Brachypodium distachyon	RLK-GNK2
Ghir_A08G004370	PRGDB00213421	55.4	280	114	2	634	1473	86	354	1.3e-83	311.2	MDP0000280399	Putative_R-Genes,_predicted_from_Pythozome	Malus x domestica	RLP
Ghir_A08G004590	PRGDB00070731	50.9	57	28	0	499	669	26	82	2.5e-10	66.6	Mdo.689	Putative_R-Genes,_predicted_from_NCBI_UniGene	Malus x domestica	T	292668962	GU732467	Malus x domestica AP2 domain class transcription factor (AP2D43) mRNA, complete cds
Ghir_A08G004810	PRGDB00171933	45.5	576	300	6	252	1949	687	1258	7.1e-133	474.6	LOC_Os11g27450.1	Putative_R-Genes,_predicted_from_Pythozome	Oryza sativa	NL			RNI-like superfamily protein (best arabidopsis hit)
Ghir_A08G004810.1	PRGDB00171933	45.5	576	300	6	252	1949	687	1258	7.1e-133	474.6	LOC_Os11g27450.1	Putative_R-Genes,_predicted_from_Pythozome	Oryza sativa	NL			RNI-like superfamily protein (best arabidopsis hit)
Ghir_A08G005110	PRGDB00189664	46.6	58	27	2	96	263	636	691	6.9e-06	53.1	Hv.31767	Putative_R-Genes,_predicted_from_NCBI_UniGene	Hordeum vulgare	NL	326501247	AK367652	Hordeum vulgare subsp. vulgare mRNA for predicted protein, complete cds, clone: NIASHv2059P21
Ghir_A08G005430	PRGDB00049879	59.7	77	31	0	5518	5748	2109	2185	1.4e-17	93.2	Os11g0686400	Putative_R-Genes,_collected_from_NCBI_Protein	Oryza sativa Japonica Group	CNL	115486666	NM_001075009	Oryza sativa (japonica cultivar-group) Os11g0686400 (Os11g0686400) mRNA, complete cds.
Ghir_A08G005890	PRGDB00189664	39.6	96	44	4	16	294	623	707	2.3e-08	61.2	Hv.31767	Putative_R-Genes,_predicted_from_NCBI_UniGene	Hordeum vulgare	NL	326501247	AK367652	Hordeum vulgare subsp. vulgare mRNA for predicted protein, complete cds, clone: NIASHv2059P21
Ghir_A08G005890.1	PRGDB00189664	39.6	96	44	4	368	646	623	707	3.2e-08	61.2	Hv.31767	Putative_R-Genes,_predicted_from_NCBI_UniGene	Hordeum vulgare	NL	326501247	AK367652	Hordeum vulgare subsp. vulgare mRNA for predicted protein, complete cds, clone: NIASHv2059P21
Ghir_A08G006150	PRGDB00202169	44.4	27	15	0	386	466	16	42	6.4	32	Bra007015	Putative_R-Genes,_predicted_from_Pythozome	Brassica rapa	RLP
Ghir_A08G006300	PRGDB00202169	51.9	241	71	3	307	900	11	249	2.1e-60	233.8	Bra007015	Putative_R-Genes,_predicted_from_Pythozome	Brassica rapa	RLP
Ghir_A08G006470	PRGDB00184523	53.1	32	15	0	3899	3994	1020	1051	0.092	39.7	GSVIVT01037631001	Putative_R-Genes,_predicted_from_Pythozome	Vitis vinifera	CNL			NB-ARC domain-containing disease resistance protein (best arabidopsis hit)
Ghir_A08G006520.3	PRGDB00183352	33.5	535	345	4	5588	7165	1401	1933	3.9e-87	324.3	GSVIVT01015461001	Putative_R-Genes,_predicted_from_Pythozome	Vitis vinifera	N			pleiotropic drug resistance 12 (best arabidopsis hit)
Ghir_A08G006570	PRGDB00213803	73.5	102	27	0	2221	2526	928	1029	5.3e-37	156.4	MDP0000322059	Putative_R-Genes,_predicted_from_Pythozome	Malus x domestica	RLP
Ghir_A08G006650	PRGDB00217533	40.7	81	45	2	2853	3086	25	105	8.3e-07	56.2	Thhalv10011182m	Putative_R-Genes,_predicted_from_Pythozome	Eutrema halophilum	CN
Ghir_A08G007050	PRGDB00189831	28.3	279	167	10	1356	2147	1161	1421	3.1e-17	90.5	Hv.34567	Putative_R-Genes,_predicted_from_NCBI_UniGene	Hordeum vulgare	NL	326530731	AK369963	Hordeum vulgare subsp. vulgare mRNA for predicted protein, complete cds, clone: NIASHv2102D06
Ghir_A08G007170	PRGDB00192813	85.5	145	21	0	392	826	832	976	8.3e-70	264.2	Smo.15449	Putative_R-Genes,_predicted_from_NCBI_UniGene	Selaginella moellendorffii	N	302822632	XM_002992927	Selaginella moellendorffii hypothetical protein, mRNA
Ghir_A08G007320	PRGDB00213057	21.5	237	184	1	755	1465	1094	1328	2.9e-10	67	MDP0000278168	Putative_R-Genes,_predicted_from_Pythozome	Malus x domestica	TNL
Ghir_A08G007740	PRGDB00171933	46.5	572	292	6	555	2240	691	1258	6e-139	495.4	LOC_Os11g27450.1	Putative_R-Genes,_predicted_from_Pythozome	Oryza sativa	NL			RNI-like superfamily protein (best arabidopsis hit)
Ghir_A08G008090	PRGDB00078883	39.5	299	178	1	3218	4105	179	477	1.2e-46	189.9	Vvi.16557	Putative_R-Genes,_predicted_from_NCBI_UniGene	Vitis vinifera	RLP	225441697	XM_002277255	PREDICTED: Vitis vinifera hypothetical protein LOC100262317 (LOC100262317), mRNA
Ghir_A08G008210	PRGDB00206876	54	50	20	1	2177	2037	2047	2096	8.8e-07	55.5	LOC_Os01g33260.1	Putative_R-Genes,_predicted_from_Pythozome	Oryza sativa	N
Ghir_A08G008340	PRGDB00177154	58.7	787	316	5	313	2661	13	794	4.5e-272	937.2	POPTR_0001s05240.1	Putative_R-Genes,_predicted_from_Pythozome	Populus trichocarpa	RLK			receptor-like protein kinase 1 (best arabidopsis hit)
Ghir_A08G008990	PRGDB00206906	41	61	36	0	868	686	1682	1742	1.3e-06	53.9	LOC_Os02g20420.1	Putative_R-Genes,_predicted_from_Pythozome	Oryza sativa	CNL
Ghir_A08G008990.1	PRGDB00206906	41	61	36	0	748	566	1682	1742	1.2e-06	53.9	LOC_Os02g20420.1	Putative_R-Genes,_predicted_from_Pythozome	Oryza sativa	CNL
Ghir_A08G009180	PRGDB00078682	54.6	152	59	3	691	1119	707	857	8.1e-38	159.1	Vvi.8276	Putative_R-Genes,_predicted_from_NCBI_UniGene	Vitis vinifera	NL	225452519	XM_002275052	PREDICTED: Vitis vinifera hypothetical protein LOC100250803 (LOC100250803), mRNA
Ghir_A08G009590	PRGDB00164261	26.4	607	363	15	871	2619	1499	2045	6.3e-46	186	Glyma16g23790.1	Putative_R-Genes,_predicted_from_Pythozome	Glycine max	CNL			transmembrane receptors;ATP binding (best arabidopsis hit)
Ghir_A08G010070	PRGDB00216122	26.9	357	212	13	136	1101	9	351	1.8e-19	97.8	MDP0000283975	Putative_R-Genes,_predicted_from_Pythozome	Malus x domestica	RLK
Ghir_A08G010180.2	PRGDB00078803	53.1	113	53	0	3050	3388	490	602	1.1e-23	112.5	Vvi.12916	Putative_R-Genes,_predicted_from_NCBI_UniGene	Vitis vinifera	N	225452756	XM_002283015	PREDICTED: Vitis vinifera hypothetical protein LOC100262734 (LOC100262734), mRNA
Ghir_A08G010410	PRGDB00215428	65.6	128	43	1	595	978	864	990	1.9e-40	167.2	MDP0000136433	Putative_R-Genes,_predicted_from_Pythozome	Malus x domestica	TNL
Ghir_A08G010560	PRGDB00070731	38.2	170	82	5	1113	1568	25	189	1.4e-17	91.3	Mdo.689	Putative_R-Genes,_predicted_from_NCBI_UniGene	Malus x domestica	T	292668962	GU732467	Malus x domestica AP2 domain class transcription factor (AP2D43) mRNA, complete cds
Ghir_A08G010580	PRGDB00201591	64	308	89	2	518	1438	5	291	1.4e-111	403.3	Bra013728	Putative_R-Genes,_predicted_from_Pythozome	Brassica rapa	RLP
Ghir_A08G010860	PRGDB00165717	67.9	1282	386	2	238	4011	21	1301	0	1699.1	cassava4.1_033556m	Putative_R-Genes,_predicted_from_Pythozome	Vitis aestivalis	RLP			Leucine-rich repeat transmembrane protein kinase (best arabidopsis hit)
Ghir_A08G011250	PRGDB00211657	64.4	45	16	0	393	527	670	714	1.1e-11	70.9	Eucgr.H02157.1	Putative_R-Genes,_predicted_from_Pythozome	Eucalyptus grandis	TNL
Ghir_A08G011320	PRGDB00213363	47.2	89	44	1	679	945	908	993	1.3e-15	85.5	MDP0000265619	Putative_R-Genes,_predicted_from_Pythozome	Malus x domestica	N
Ghir_A08G011400	PRGDB00184318	59.2	49	20	0	505	359	811	859	3.5e-07	57	GSVIVT01034429001	Putative_R-Genes,_predicted_from_Pythozome	Vitis vinifera	CNL			Disease resistance protein (CC-NBS-LRR class) family (best arabidopsis hit)
Ghir_A08G011570	PRGDB00215267	33.6	217	138	5	2104	2745	694	907	2.4e-23	111.3	MDP0000256952	Putative_R-Genes,_predicted_from_Pythozome	Malus x domestica	RLP
Ghir_A08G011570.1	PRGDB00215267	33.8	216	135	5	1873	2511	697	907	3.8e-23	110.5	MDP0000256952	Putative_R-Genes,_predicted_from_Pythozome	Malus x domestica	RLP
Ghir_A08G011860	PRGDB00177091	42.2	147	68	5	40	435	240	384	1e-20	101.3	POPTR_0818s00195.1	Putative_R-Genes,_predicted_from_Pythozome	Populus trichocarpa	T			NAC domain containing protein 17 (best arabidopsis hit)
Ghir_A08G011860.1	PRGDB00177091	42.2	147	68	5	202	597	240	384	1.3e-20	101.3	POPTR_0818s00195.1	Putative_R-Genes,_predicted_from_Pythozome	Populus trichocarpa	T			NAC domain containing protein 17 (best arabidopsis hit)
Ghir_A08G011870	PRGDB00177091	45	149	77	4	222	665	240	384	2.2e-26	120.6	POPTR_0818s00195.1	Putative_R-Genes,_predicted_from_Pythozome	Populus trichocarpa	T			NAC domain containing protein 17 (best arabidopsis hit)
Ghir_A08G012360	PRGDB00183040	42.9	63	33	2	484	666	585	646	1.2e-08	60.8	GSVIVT01007793001	Putative_R-Genes,_predicted_from_Pythozome	Vitis vinifera	NL			RING/U-box superfamily protein (best arabidopsis hit)
Ghir_A08G012430	PRGDB00073207	45.2	573	298	7	313	1998	691	1258	1.7e-134	479.9	Os.86222	Putative_R-Genes,_predicted_from_NCBI_UniGene	Oryza sativa Japonica Group	NL	115485442	NM_001074397	Oryza sativa Japonica Group Os11g0462900 (Os11g0462900) mRNA, complete cds
Ghir_A08G012430.1	PRGDB00171933	48	254	128	3	1452	2210	1008	1258	2.8e-61	236.9	LOC_Os11g27450.1	Putative_R-Genes,_predicted_from_Pythozome	Oryza sativa	NL			RNI-like superfamily protein (best arabidopsis hit)
Ghir_A08G012630	PRGDB00192324	60.6	170	53	1	1897	2406	1118	1273	5.9e-52	206.1	Mtr.12478	Putative_R-Genes,_predicted_from_NCBI_UniGene	Medicago truncatula	TNL	357500090	XM_003620286	Medicago truncatula Sucrose synthase (MTR_6g081120) mRNA, complete cds
Ghir_A08G012640	PRGDB00070731	41.6	77	45	0	467	697	26	102	8.3e-11	68.2	Mdo.689	Putative_R-Genes,_predicted_from_NCBI_UniGene	Malus x domestica	T	292668962	GU732467	Malus x domestica AP2 domain class transcription factor (AP2D43) mRNA, complete cds
Ghir_A08G012830.1	PRGDB00184089	57.8	45	19	0	141	7	740	784	1.1e-06	55.8	GSVIVT01029816001	Putative_R-Genes,_predicted_from_Pythozome	Vitis vinifera	RLP			BRI1-associated receptor kinase (best arabidopsis hit)
Ghir_A08G012860	PRGDB00148403	33.8	71	47	0	2176	1964	1375	1445	0.0094	42.7	clementine0.9_035959m	Putative_R-Genes,_predicted_from_Pythozome	Citrus clementina	CNL			NB-ARC domain-containing disease resistance protein (best arabidopsis hit)
Ghir_A08G012900	PRGDB00211657	47.1	51	27	0	296	448	670	720	1.6e-07	57	Eucgr.H02157.1	Putative_R-Genes,_predicted_from_Pythozome	Eucalyptus grandis	TNL
Ghir_A08G012920	PRGDB00211657	51.1	45	22	0	336	470	670	714	1.3e-06	53.9	Eucgr.H02157.1	Putative_R-Genes,_predicted_from_Pythozome	Eucalyptus grandis	TNL
Ghir_A08G013010	PRGDB00078803	45.8	59	32	0	434	610	13	71	1.7e-09	65.5	Vvi.12916	Putative_R-Genes,_predicted_from_NCBI_UniGene	Vitis vinifera	N	225452756	XM_002283015	PREDICTED: Vitis vinifera hypothetical protein LOC100262734 (LOC100262734), mRNA
Ghir_A08G013010.1	PRGDB00078803	40.6	1251	715	7	662	4372	13	1249	1.1e-269	929.9	Vvi.12916	Putative_R-Genes,_predicted_from_NCBI_UniGene	Vitis vinifera	N	225452756	XM_002283015	PREDICTED: Vitis vinifera hypothetical protein LOC100262734 (LOC100262734), mRNA
Ghir_A08G013070	PRGDB00217154	64.2	53	18	1	728	883	51	103	2.3e-10	66.6	MDP0000385217	Putative_R-Genes,_predicted_from_Pythozome	Malus x domestica	RLP
Ghir_A08G013290	PRGDB00211657	64.4	45	16	0	324	458	670	714	1.1e-11	70.9	Eucgr.H02157.1	Putative_R-Genes,_predicted_from_Pythozome	Eucalyptus grandis	TNL
Ghir_A08G013610	PRGDB00215055	47.3	74	35	2	557	778	758	827	4.4e-14	79	MDP0000248164	Putative_R-Genes,_predicted_from_Pythozome	Malus x domestica	NL
Ghir_A08G014000	PRGDB00177064	41.8	55	31	1	389	553	382	435	5.4e-07	54.7	29912.m005281	Putative_R-Genes,_predicted_from_Pythozome	Oryza barthii	N			Flavin-binding monooxygenase family protein (best arabidopsis hit)
Ghir_A08G014150	PRGDB00217904	29.2	65	46	0	400	594	183	247	2.3	32.3	Thhalv10018718m	Putative_R-Genes,_predicted_from_Pythozome	Eutrema halophilum	TNL
Ghir_A08G014530	PRGWK00002391	52.9	157	73	1	499	966	91	247	4.9e-39	162.5	Sotub12g019040.1.1	Contributed_R-Genes	Solanum tuberosum	RLP
Ghir_A08G014540	PRGDB00183798	75	40	10	0	218	337	652	691	3.3e-10	65.1	GSVIVT01025162001	Putative_R-Genes,_predicted_from_Pythozome	Vitis vinifera	Mlo-like			Seven transmembrane MLO family protein (best arabidopsis hit)
Ghir_A08G014560	PRGDB00156657	66.7	57	19	0	644	814	228	284	2.2e-15	83.2	Glyma03g23250.1	Putative_R-Genes,_predicted_from_Pythozome	Glycine max	T			GATA transcription factor 2 (best arabidopsis hit)
Ghir_A08G014860	PRGDB00202169	36.7	90	56	1	291	557	16	105	2.8e-11	71.6	Bra007015	Putative_R-Genes,_predicted_from_Pythozome	Brassica rapa	RLP
Ghir_A08G014860.1	PRGDB00202169	33.9	115	73	3	291	629	16	129	1.6e-13	79	Bra007015	Putative_R-Genes,_predicted_from_Pythozome	Brassica rapa	RLP
Ghir_A08G014880	PRGDB00182746	70.7	184	54	0	1233	1784	1219	1402	2.2e-79	296.6	107342	Putative_R-Genes,_predicted_from_Pythozome	Ectocarpus siliculosus	N			mitogen-activated protein kinase kinase kinase 7 (best arabidopsis hit)
Ghir_A08G015070.1	PRGDB00165806	55.4	74	33	0	347	568	29	102	8.5e-17	87.8	cassava4.1_000460m	Putative_R-Genes,_predicted_from_Pythozome	Vitis aestivalis	CNL			LRR and NB-ARC domains-containing disease resistance protein (best arabidopsis hit)
Ghir_A08G015110	PRGDB00162138	47	1359	656	14	555	4604	29	1332	0	1170.2	cassava4.1_032626m	Putative_R-Genes,_predicted_from_Pythozome	Vitis aestivalis	NL			NB-ARC domain-containing disease resistance protein (best arabidopsis hit)
Ghir_A08G015120	PRGDB00078847	24.7	356	202	12	2677	3735	820	1112	8.2e-08	59.7	Vvi.15223	Putative_R-Genes,_predicted_from_NCBI_UniGene	Vitis vinifera	NL	225465934	XM_002268470	PREDICTED: Vitis vinifera hypothetical protein LOC100248074 (LOC100248074), mRNA
Ghir_A08G015180	PRGDB00216326	26.3	167	115	3	567	1061	810	970	2e-11	70.9	MDP0000255780	Putative_R-Genes,_predicted_from_Pythozome	Malus x domestica	RLP
Ghir_A08G015510	PRGDB00202169	48.4	128	66	0	299	682	13	140	1.1e-31	137.9	Bra007015	Putative_R-Genes,_predicted_from_Pythozome	Brassica rapa	RLP
Ghir_A08G015560	PRGDB00186748	64.3	42	14	1	663	788	1549	1589	6e-08	59.3		Putative_R-Genes,_collected_from_NCBI_Protein	Vitis vinifera	CNL	359494970	XM_002269736	PREDICTED: Vitis vinifera putative disease resistance protein At3g14460-like (LOC100262349), mRNA.
Ghir_A08G015770	PRGDB00147495	29.8	198	116	5	427	990	41	225	1e-12	75.5	Bradi5g27650.1	Putative_R-Genes,_predicted_from_Pythozome	Ricinus communis	N			ABC-2 type transporter family protein (best arabidopsis hit); white-brown complex homolog protein 5, putative, expressed (best rice hit)
Ghir_A08G015830	PRGDB00175198	74.8	659	155	5	273	2222	1	657	1.4e-279	961.8	POPTR_0003s03650.1	Putative_R-Genes,_predicted_from_Pythozome	Populus trichocarpa	N			ATP-binding cassette 14 (best arabidopsis hit)
Ghir_A08G015830.1	PRGDB00078860	79.1	320	64	2	273	1223	1	320	1.3e-138	493.8	Vvi.15723	Putative_R-Genes,_predicted_from_NCBI_UniGene	Vitis vinifera	CN	225427592	XM_002270497	PREDICTED: Vitis vinifera hypothetical protein LOC100247745 (LOC100247745), mRNA
Ghir_A08G016000.1	PRGDB00065930	24.2	273	173	9	347	1081	52	318	7.9e-06	51.6	At.11684	Putative_R-Genes,_predicted_from_NCBI_UniGene	Arabidopsis thaliana	RLP	26449860	AK117384	Arabidopsis thaliana At1g73070 mRNA for unknown protein, complete cds, clone: RAFL16-96-P09
Ghir_A08G016240	PRGDB00144080	50	116	53	3	1664	1996	237	352	1.2e-24	115.2	907240	Putative_R-Genes,_predicted_from_Pythozome	Arabidopsis lyrata	CNL			Disease resistance protein (CC-NBS-LRR class) family (best arabidopsis hit)
Ghir_A08G016240.3	PRGDB00144080	50	116	53	3	1524	1856	237	352	1.1e-24	115.2	907240	Putative_R-Genes,_predicted_from_Pythozome	Arabidopsis lyrata	CNL			Disease resistance protein (CC-NBS-LRR class) family (best arabidopsis hit)
Ghir_A08G016270	PRGDB00217737	47.5	61	32	0	643	825	185	245	7.8e-09	61.2	Thhalv10027751m	Putative_R-Genes,_predicted_from_Pythozome	Eutrema halophilum	TNL
Ghir_A08G016330	PRGDB00182255	37.2	86	52	1	1833	2090	1615	1698	4.6e-06	53.9	441722	Putative_R-Genes,_predicted_from_Pythozome	Selaginella moellendorffii	N			pleiotropic drug resistance 12 (best arabidopsis hit)
Ghir_A08G016640.1	PRGDB00215267	33.9	236	140	6	3349	4032	707	934	9.9e-25	116.3	MDP0000256952	Putative_R-Genes,_predicted_from_Pythozome	Malus x domestica	RLP
Ghir_A08G016660	PRGDB00177091	50.3	149	68	5	524	961	240	385	9.2e-32	138.3	POPTR_0818s00195.1	Putative_R-Genes,_predicted_from_Pythozome	Populus trichocarpa	T			NAC domain containing protein 17 (best arabidopsis hit)
Ghir_A08G017320	PRGDB00145022	45.6	136	74	0	427	834	173	308	3e-27	123.2	AT1G51270.3	Putative_R-Genes,_predicted_from_Pythozome	Arabidopsis thaliana	T			MSP domain containing protein, expressed (best arabidopsis hit)
Ghir_A08G017350.1	PRGDB00202169	50.6	241	74	4	356	949	11	249	2.4e-57	222.2	Bra007015	Putative_R-Genes,_predicted_from_Pythozome	Brassica rapa	RLP
Ghir_A08G017420	PRGDB00070731	50	58	28	1	527	700	26	82	2.6e-09	63.2	Mdo.689	Putative_R-Genes,_predicted_from_NCBI_UniGene	Malus x domestica	T	292668962	GU732467	Malus x domestica AP2 domain class transcription factor (AP2D43) mRNA, complete cds
Ghir_A08G017440	PRGDB00070731	50	58	28	1	612	785	26	82	2.4e-09	63.2	Mdo.689	Putative_R-Genes,_predicted_from_NCBI_UniGene	Malus x domestica	T	292668962	GU732467	Malus x domestica AP2 domain class transcription factor (AP2D43) mRNA, complete cds
Ghir_A08G017450	PRGDB00070731	49.5	107	50	2	547	867	26	128	6.5e-18	91.3	Mdo.689	Putative_R-Genes,_predicted_from_NCBI_UniGene	Malus x domestica	T	292668962	GU732467	Malus x domestica AP2 domain class transcription factor (AP2D43) mRNA, complete cds
Ghir_A08G017590	PRGDB00070731	55.6	63	28	0	337	525	26	88	1.6e-13	77	Mdo.689	Putative_R-Genes,_predicted_from_NCBI_UniGene	Malus x domestica	T	292668962	GU732467	Malus x domestica AP2 domain class transcription factor (AP2D43) mRNA, complete cds
Ghir_A08G017600	PRGDB00211657	68.9	45	14	0	323	457	670	714	1.3e-12	73.9	Eucgr.H02157.1	Putative_R-Genes,_predicted_from_Pythozome	Eucalyptus grandis	TNL
Ghir_A08G018060	PRGDB00145113	46.9	96	46	2	192	479	6	96	3.4e-19	95.5	AT1G70250.1	Putative_R-Genes,_predicted_from_Pythozome	Arabidopsis thaliana	Other			Protein kinase domain containing protein, expressed (best arabidopsis hit)
Ghir_A08G018140	PRGDB00148506	69.2	656	200	2	450	2414	22	676	9.8e-263	906	clementine0.9_004009m	Putative_R-Genes,_predicted_from_Pythozome	Citrus clementina	RLP			Leucine-rich repeat protein kinase family protein (best arabidopsis hit)
Ghir_A08G018510	PRGDB00201520	63.3	264	85	4	343	1116	680	937	1.3e-86	320.1	Bra013656	Putative_R-Genes,_predicted_from_Pythozome	Brassica rapa	RLK-GNK2
Ghir_A08G018880	PRGDB00154712	71.8	642	178	2	330	2252	1	640	8e-276	949.5	orange1.1g006178m	Putative_R-Genes,_predicted_from_Pythozome	Citrus sinensis	RLP			Leucine-rich repeat protein kinase family protein (best arabidopsis hit)
Ghir_A08G018900	PRGDB00184271	91.5	47	3	1	268	408	662	707	9.1e-18	91.7	GRMZM2G162531_T01	Putative_R-Genes,_predicted_from_Pythozome	Zea mays	RLP			STRUBBELIG-receptor family 8 (best arabidopsis hit); STRUBBELIG-RECEPTOR FAMILY 7 precursor, putative, expressed (best rice hit)
Ghir_A08G019060	PRGDB00184271	80.9	47	8	1	353	493	662	707	5e-16	85.9	GRMZM2G162531_T01	Putative_R-Genes,_predicted_from_Pythozome	Zea mays	RLP			STRUBBELIG-receptor family 8 (best arabidopsis hit); STRUBBELIG-RECEPTOR FAMILY 7 precursor, putative, expressed (best rice hit)
Ghir_A08G019590	PRGDB00078103	38	345	186	9	293	1297	1118	1444	9.2e-55	214.5	Ta.68544	Putative_R-Genes,_predicted_from_NCBI_UniGene	Triticum aestivum	CNL	241988513	AK335771	Triticum aestivum cDNA, clone: WT013_L19, cultivar: Chinese Spring
Ghir_A08G019920.1	PRGDB00070731	47.4	78	32	3	243	452	6	82	1.5e-09	64.3	Mdo.689	Putative_R-Genes,_predicted_from_NCBI_UniGene	Malus x domestica	T	292668962	GU732467	Malus x domestica AP2 domain class transcription factor (AP2D43) mRNA, complete cds
Ghir_A08G020360	PRGDB00170967	37	108	64	3	1149	1463	676	782	6.6e-09	62.8	LOC_Os07g14820.1	Putative_R-Genes,_predicted_from_Pythozome	Oryza sativa	RLP			Leucine-rich repeat protein kinase family protein (best arabidopsis hit)
Ghir_A08G020510.1	PRGDB00177091	36.7	128	73	5	240	620	240	360	1.2e-11	72	POPTR_0818s00195.1	Putative_R-Genes,_predicted_from_Pythozome	Populus trichocarpa	T			NAC domain containing protein 17 (best arabidopsis hit)
Ghir_A08G020810.4	PRGDB00156657	63.8	58	21	0	1741	1914	227	284	9.4e-15	82	Glyma03g23250.1	Putative_R-Genes,_predicted_from_Pythozome	Glycine max	T			GATA transcription factor 2 (best arabidopsis hit)
Ghir_A08G020920	PRGDB00211657	52	50	24	0	147	296	670	719	1.2e-08	60.8	Eucgr.H02157.1	Putative_R-Genes,_predicted_from_Pythozome	Eucalyptus grandis	TNL
Ghir_A08G021030	PRGDB00213421	40.9	115	62	2	992	1327	129	240	4.4e-15	83.6	MDP0000280399	Putative_R-Genes,_predicted_from_Pythozome	Malus x domestica	RLP
Ghir_A08G021160	PRGDB00153328	73	393	92	2	898	2034	381	773	1e-161	570.1	orange1.1g004124m	Putative_R-Genes,_predicted_from_Pythozome	Citrus sinensis	RLP			Leucine-rich repeat protein kinase family protein (best arabidopsis hit)
Ghir_A08G021200	PRGDB00179296	79	124	26	0	599	970	868	991	3.8e-54	212.2	Sb05g008160.1	Putative_R-Genes,_predicted_from_Pythozome	Sorghum bicolor	NL			MAP kinase kinase 5 (best arabidopsis hit); resistance protein, putative, expressed (best rice hit)
Ghir_A08G021320	PRGDB00072356	36.7	90	57	0	722	991	1105	1194	5.6e-08	59.3	Os.35691	Putative_R-Genes,_predicted_from_NCBI_UniGene	Oryza sativa Japonica Group	RLP	32976298	AK066280	Oryza sativa Japonica Group cDNA clone:J013066D13, full insert sequence
Ghir_A08G021490	PRGDB00158618	92.7	315	23	0	1038	1982	23	337	2.9e-166	585.9	Glyma06g35980.1	Putative_R-Genes,_predicted_from_Pythozome	Glycine max	CNL			lon protease 1 (best arabidopsis hit)
Ghir_A08G021680.1	PRGDB00200844	47.7	329	143	3	634	1542	57	382	3.2e-84	312.4	Bra008427	Putative_R-Genes,_predicted_from_Pythozome	Brassica rapa	RLP
Ghir_A08G022130	PRGDB00191296	28.5	263	183	2	970	1752	262	521	1.9e-22	107.5	Lsa.44031	Putative_R-Genes,_predicted_from_NCBI_UniGene	Lactuca sativa	N	329679120	JI581626	TSA: Lactuca sativa CLC_LTR_V1A_17001 mRNA sequence
Ghir_A08G022290	PRGDB00216326	30.8	117	81	0	929	1279	771	887	1.5e-12	75.5	MDP0000255780	Putative_R-Genes,_predicted_from_Pythozome	Malus x domestica	RLP
Ghir_A08G023580	PRGDB00164261	23.7	586	390	10	571	2307	1509	2044	7.4e-45	182.2	Glyma16g23790.1	Putative_R-Genes,_predicted_from_Pythozome	Glycine max	CNL			transmembrane receptors;ATP binding (best arabidopsis hit)
Ghir_A08G023610	PRGDB00143614	30.5	236	134	6	621	1304	102	315	1.8e-18	94	318095	Putative_R-Genes,_predicted_from_Pythozome	Arabidopsis lyrata	N			ABC-2 type transporter family protein (best arabidopsis hit)
Ghir_A08G023640	PRGDB00061532	59.4	32	13	0	614	709	1052	1083	5.2e-05	50.1	disease resistance protein	Putative_R-Genes,_collected_from_NCBI_Protein	Brassica rapa subsp. pekinensis	TNL	227438196	FJ842807	Brassica rapa subsp. pekinensis isolate BrTNL50 disease resistance protein gene, complete cds.
Ghir_A08G023640.2	PRGDB00061532	59.4	32	13	0	626	721	1052	1083	6.1e-05	50.1	disease resistance protein	Putative_R-Genes,_collected_from_NCBI_Protein	Brassica rapa subsp. pekinensis	TNL	227438196	FJ842807	Brassica rapa subsp. pekinensis isolate BrTNL50 disease resistance protein gene, complete cds.
Ghir_A08G023970	PRGDB00167870	72.4	123	30	1	357	725	316	434	8e-41	167.5	Medtr3g021430.1	Putative_R-Genes,_predicted_from_Pythozome	Medicago truncatula	CNL			Disease resistance protein (TIR-NBS-LRR class) family (best arabidopsis hit)
Ghir_A08G024180	PRGDB00048590	27.4	179	104	4	2398	2928	518	672	3.8e-09	63.9	Disease resistance protein I2, putative	Putative_R-Genes,_collected_from_NCBI_Protein	Solanum demissum	RLP	53749428	AC151801	Solanum demissum chromosome 11 clone PGEC591C22, complete sequence.
Ghir_A08G024210	PRGDB00154389	90.6	32	3	0	2366	2461	2	33	1.5e-08	62	orange1.1g013724m	Putative_R-Genes,_predicted_from_Pythozome	Citrus sinensis	T			Disease resistance protein (TIR-NBS-LRR class) family (best arabidopsis hit)
Ghir_A08G024350	PRGDB00167217	45.6	90	48	1	1822	1553	949	1037	2.3e-14	81.3	mgv1a020513m	Putative_R-Genes,_predicted_from_Pythozome	Cucumis x hytivus	CNL			NB-ARC domain-containing disease resistance protein (best arabidopsis hit)
Ghir_A08G024500	PRGDB00181635	36.7	169	94	6	126	596	2	169	3.8e-22	105.5	Si025833m	Putative_R-Genes,_predicted_from_Pythozome	Setaria italica	NL			NAC domain containing protein 90 (best arabidopsis hit); NBS-LRR disease resistance protein, putative, expressed (best rice hit)
Ghir_A08G024510	PRGDB00181635	38.3	162	87	6	100	546	8	169	2.5e-23	109.4	Si025833m	Putative_R-Genes,_predicted_from_Pythozome	Setaria italica	NL			NAC domain containing protein 90 (best arabidopsis hit); NBS-LRR disease resistance protein, putative, expressed (best rice hit)
Ghir_A08G024570	PRGDB00216981	34.3	312	172	6	264	1142	110	407	4.2e-44	179.9	MDP0000297928	Putative_R-Genes,_predicted_from_Pythozome	Malus x domestica	RLP
Ghir_A08G024690	PRGDB00167562	47.4	192	101	0	1424	1999	444	635	7.4e-46	186	Medtr1g118320.1	Putative_R-Genes,_predicted_from_Pythozome	Medicago truncatula	CN			phosphoenolpyruvate carboxylase 4 (best arabidopsis hit)
Ghir_A08G024710	PRGDB00198577	33.3	99	56	2	1697	1972	17	112	0.0044	43.5	Pavirv00064701m	Putative_R-Genes,_predicted_from_Pythozome	Panicum virgatum	CN
Ghir_A08G024980	PRGDB00215055	39.4	71	39	3	1532	1741	761	828	1.4e-08	61.6	MDP0000248164	Putative_R-Genes,_predicted_from_Pythozome	Malus x domestica	NL
Ghir_A08G024980.1	PRGDB00215055	39.4	71	39	3	1417	1626	761	828	1.3e-08	61.6	MDP0000248164	Putative_R-Genes,_predicted_from_Pythozome	Malus x domestica	NL
Ghir_A08G025040	PRGDB00217737	36.1	147	89	3	381	812	186	330	2.2e-14	80.5	Thhalv10027751m	Putative_R-Genes,_predicted_from_Pythozome	Eutrema halophilum	TNL
Ghir_A08G025090	PRGDB00073072	45.4	599	303	5	527	2254	61	658	5.6e-140	498.4	Os.80143	Putative_R-Genes,_predicted_from_NCBI_UniGene	Oryza sativa Japonica Group	CNL	32975074	AK065056	Oryza sativa Japonica Group cDNA clone:J013001J06, full insert sequence
Ghir_A08G025720	PRGDB00164453	26.5	204	134	7	3079	3660	1109	1306	2.7e-09	64.7	Glyma16g33590.1	Putative_R-Genes,_predicted_from_Pythozome	Glycine max	TNL			Disease resistance protein (TIR-NBS-LRR class) family (best arabidopsis hit)
Ghir_A08G025920	PRGDB00079040	37.2	145	70	6	250	636	1	140	5.2e-13	75.5	Vvi.23988	Putative_R-Genes,_predicted_from_NCBI_UniGene	Vitis vinifera	RLP	225442062	XM_002272327	PREDICTED: Vitis vinifera hypothetical protein LOC100260039 (LOC100260039), mRNA
Ghir_A08G026250	PRGDB00156657	62.1	58	22	0	944	1117	227	284	4e-14	79.3	Glyma03g23250.1	Putative_R-Genes,_predicted_from_Pythozome	Glycine max	T			GATA transcription factor 2 (best arabidopsis hit)
Ghir_A08G026300	PRGDB00070731	43.5	92	46	2	295	552	1	92	2.5e-13	76.3	Mdo.689	Putative_R-Genes,_predicted_from_NCBI_UniGene	Malus x domestica	T	292668962	GU732467	Malus x domestica AP2 domain class transcription factor (AP2D43) mRNA, complete cds
Ghir_A08G026640.1	PRGDB00067001	47.1	223	105	3	574	1221	147	363	1.7e-43	177.9	At.66955	Putative_R-Genes,_predicted_from_NCBI_UniGene	Arabidopsis thaliana	RPW8-NL	110737162	AK228620	Arabidopsis thaliana mRNA for ADR1, complete cds, clone: RAFL15-45-C23
Ghir_A09G000120	PRGDB00167562	47.4	192	101	0	1489	2064	444	635	9.2e-46	185.7	Medtr1g118320.1	Putative_R-Genes,_predicted_from_Pythozome	Medicago truncatula	CN			phosphoenolpyruvate carboxylase 4 (best arabidopsis hit)
Ghir_A09G000160	PRGDB00072070	25.3	324	199	9	980	1930	21	308	1.2e-13	78.6	Os.15454	Putative_R-Genes,_predicted_from_NCBI_UniGene	Oryza sativa Japonica Group	CN	32979699	AK069675	Oryza sativa Japonica Group cDNA clone:J023027M09, full insert sequence
Ghir_A09G000340	PRGDB00176202	77.2	911	205	2	727	3459	6	913	0	1421.8	29618.m000102	Putative_R-Genes,_predicted_from_Pythozome	Oryza barthii	RLP			Leucine-rich repeat transmembrane protein kinase (best arabidopsis hit)
Ghir_A09G000670	PRGDB00143462	37.1	124	72	3	134	505	1298	1415	3.4e-12	73.6	493465	Putative_R-Genes,_predicted_from_Pythozome	Arabidopsis lyrata	TNL			Regulator of chromosome condensation (RCC1) family protein (best arabidopsis hit)
Ghir_A09G000870.1	PRGDB00201508	55.9	410	132	4	177	1277	2	405	1.6e-120	433	Bra021474	Putative_R-Genes,_predicted_from_Pythozome	Brassica rapa	RLP
Ghir_A09G000930	PRGDB00149288	62.5	1158	384	15	1	3360	1	1146	0	1352.4	evm.model.supercontig_14.179	Putative_R-Genes,_predicted_from_Pythozome	Arabidopsis lyrata subsp. lyrata	RLP			receptor-like protein kinase 2 (best arabidopsis hit)
Ghir_A09G001230	PRGDB00183352	34.6	561	326	6	203	1855	1398	1927	4.9e-87	322	GSVIVT01015461001	Putative_R-Genes,_predicted_from_Pythozome	Vitis vinifera	N			pleiotropic drug resistance 12 (best arabidopsis hit)
Ghir_A09G001250.1	PRGDB00144655	54.5	33	11	2	1386	1481	467	496	0.13	38.5	AT4G12020.2	Putative_R-Genes,_predicted_from_Pythozome	Arabidopsis thaliana	TNL			STE_MEKK_ste11_MAP3K.14 - STE kinases include homologs to sterile 7, sterile 11 and sterile 20 from yeast, expressed (best arabidopsis hit)
Ghir_A09G001380	PRGDB00144655	63	27	10	0	84	4	620	646	0.012	42.4	AT4G12020.2	Putative_R-Genes,_predicted_from_Pythozome	Arabidopsis thaliana	TNL			STE_MEKK_ste11_MAP3K.14 - STE kinases include homologs to sterile 7, sterile 11 and sterile 20 from yeast, expressed (best arabidopsis hit)
Ghir_A09G001460	PRGDB00201835	44.8	67	35	1	614	814	260	324	1.7e-06	53.5	Bra013144	Putative_R-Genes,_predicted_from_Pythozome	Brassica rapa	TNL
Ghir_A09G001890	PRGDB00075233	52	102	43	1	1998	2303	703	798	1.2e-20	101.7	Pth.8001	Putative_R-Genes,_predicted_from_NCBI_UniGene	Populus trichocarpa	RLP	224110023	XM_002333124	Populus trichocarpa predicted protein, mRNA
Ghir_A09G001970	PRGDB00211892	44.7	955	463	7	109	2793	34	983	9.7e-211	733.4	Eucgr.I00188.1	Putative_R-Genes,_predicted_from_Pythozome	Eucalyptus grandis	RLP
Ghir_A09G002030.1	PRGDB00078803	87.7	1247	150	1	355	4086	7	1253	0	2103.6	Vvi.12916	Putative_R-Genes,_predicted_from_NCBI_UniGene	Vitis vinifera	N	225452756	XM_002283015	PREDICTED: Vitis vinifera hypothetical protein LOC100262734 (LOC100262734), mRNA
Ghir_A09G002080	PRGDB00178188	44.6	1046	494	16	28	2979	15	1037	1.9e-225	782.3	POPTR_0002s12280.1	Putative_R-Genes,_predicted_from_Pythozome	Populus trichocarpa	RLP			Leucine-rich repeat receptor-like protein kinase family protein (best arabidopsis hit)
Ghir_A09G002080.1	PRGDB00147868	48.4	805	352	7	362	2773	103	845	5.1e-196	684.5	clementine0.9_027599m	Putative_R-Genes,_predicted_from_Pythozome	Citrus clementina	RLP			Leucine-rich repeat receptor-like protein kinase family protein (best arabidopsis hit)
Ghir_A09G002140.1	PRGDB00153160	44.1	751	358	9	1	2103	1	739	3.9e-162	571.6	orange1.1g004642m	Putative_R-Genes,_predicted_from_Pythozome	Citrus sinensis	RLP			Leucine-rich repeat receptor-like protein kinase family protein (best arabidopsis hit)
Ghir_A09G002500	PRGDB00177261	61.3	230	89	0	219	908	8	237	9.9e-81	300.1	POPTR_0001s34850.1	Putative_R-Genes,_predicted_from_Pythozome	Populus trichocarpa	RLP			Leucine-rich repeat protein kinase family protein (best arabidopsis hit)
Ghir_A09G002600	PRGDB00215095	26.2	519	329	10	468	1988	29	505	9.5e-41	168.3	MDP0000319352	Putative_R-Genes,_predicted_from_Pythozome	Malus x domestica	TNL
Ghir_A09G002610	PRGDB00213507	41.7	72	42	0	722	937	176	247	1.1e-09	65.9	MDP0000288100	Putative_R-Genes,_predicted_from_Pythozome	Malus x domestica	NL
Ghir_A09G002740.1	PRGDB00078682	54.9	395	139	9	156	1265	653	1033	1.5e-106	386.3	Vvi.8276	Putative_R-Genes,_predicted_from_NCBI_UniGene	Vitis vinifera	NL	225452519	XM_002275052	PREDICTED: Vitis vinifera hypothetical protein LOC100250803 (LOC100250803), mRNA
Ghir_A09G003220	PRGDB00215520	46.6	335	156	6	297	1232	896	1230	3.3e-71	269.2	MDP0000286727	Putative_R-Genes,_predicted_from_Pythozome	Malus x domestica	TNL
Ghir_A09G003250	PRGDB00216122	53	364	126	6	129	1220	814	1132	1.2e-99	363.6	MDP0000283975	Putative_R-Genes,_predicted_from_Pythozome	Malus x domestica	RLK
Ghir_A09G003300	PRGDB00202169	39.2	245	107	4	252	878	12	250	2.9e-39	162.5	Bra007015	Putative_R-Genes,_predicted_from_Pythozome	Brassica rapa	RLP
Ghir_A09G004220	PRGDB00189838	44.9	365	185	5	19	1110	1238	1587	1.6e-82	306.2	Hv.34616	Putative_R-Genes,_predicted_from_NCBI_UniGene	Hordeum vulgare	NL	326530114	AK377143	Hordeum vulgare subsp. vulgare mRNA for predicted protein, partial cds, clone: NIASHv3149K09
Ghir_A09G004220.1	PRGDB00189838	51.7	58	26	2	385	555	1254	1310	5.7e-08	58.5	Hv.34616	Putative_R-Genes,_predicted_from_NCBI_UniGene	Hordeum vulgare	NL	326530114	AK377143	Hordeum vulgare subsp. vulgare mRNA for predicted protein, partial cds, clone: NIASHv3149K09
Ghir_A09G004450	PRGDB00163018	71.7	106	30	0	131	448	1	106	1.1e-36	154.1	Egrandis_v1_0.023118m	Putative_R-Genes,_predicted_from_Pythozome	Areca catechu	T			Disease resistance protein (TIR-NBS-LRR class) family (best arabidopsis hit)
Ghir_A09G004480	PRGDB00184271	91.5	47	3	1	496	636	662	707	1.2e-17	91.7	GRMZM2G162531_T01	Putative_R-Genes,_predicted_from_Pythozome	Zea mays	RLP			STRUBBELIG-receptor family 8 (best arabidopsis hit); STRUBBELIG-RECEPTOR FAMILY 7 precursor, putative, expressed (best rice hit)
Ghir_A09G004700	PRGDB00070731	54.7	64	29	0	509	700	26	89	2e-11	70.5	Mdo.689	Putative_R-Genes,_predicted_from_NCBI_UniGene	Malus x domestica	T	292668962	GU732467	Malus x domestica AP2 domain class transcription factor (AP2D43) mRNA, complete cds
Ghir_A09G005100	PRGDB00214989	75.4	447	105	2	1607	2947	168	609	1.5e-194	679.9	MDP0000481805	Putative_R-Genes,_predicted_from_Pythozome	Malus x domestica	N
Ghir_A09G005120	PRGDB00207410	35.5	468	244	10	214	1464	36	496	1.5e-60	233.8	Aquca_009_00902.1	Putative_R-Genes,_predicted_from_Pythozome	Aquilegia coerulea	RLP
Ghir_A09G005190.1	PRGDB00150119	67.3	673	194	3	91	2031	1	673	4.7e-260	897.5	evm.model.supercontig_3.281	Putative_R-Genes,_predicted_from_Pythozome	Arabidopsis lyrata subsp. lyrata	RLP			Leucine-rich repeat protein kinase family protein (best arabidopsis hit)
Ghir_A09G005450.1	PRGDB00210019	64.4	73	23	2	616	831	486	556	1.1e-15	86.3	Eucgr.E00958.1	Putative_R-Genes,_predicted_from_Pythozome	Eucalyptus grandis	NL
Ghir_A09G005560	PRGDB00215793	52.4	63	30	0	262	450	983	1045	2e-14	80.1	MDP0000281804	Putative_R-Genes,_predicted_from_Pythozome	Malus x domestica	CNL
Ghir_A09G005820	PRGDB00167655	36.1	169	102	3	583	1089	666	828	1.2e-23	110.9	Medtr2g018300.1	Putative_R-Genes,_predicted_from_Pythozome	Medicago truncatula	CNL			LRR and NB-ARC domains-containing disease resistance protein (best arabidopsis hit)
Ghir_A09G005920	PRGDB00204891	41.6	125	63	4	1153	1518	1024	1141	2.4e-19	96.7	Lus10020500	Putative_R-Genes,_predicted_from_Pythozome	Linum usitatissimum	RLP
Ghir_A09G006030	PRGDB00214355	28.9	159	98	4	714	1178	766	913	4.1e-09	62.8	MDP0000310183	Putative_R-Genes,_predicted_from_Pythozome	Malus x domestica	CNL
Ghir_A09G006150.1	PRGDB00156657	67.2	58	19	0	755	928	227	284	1.3e-15	84.7	Glyma03g23250.1	Putative_R-Genes,_predicted_from_Pythozome	Glycine max	T			GATA transcription factor 2 (best arabidopsis hit)
Ghir_A09G007650.1	PRGDB00153812	66.6	395	128	3	839	2020	268	659	1.2e-141	503.4	orange1.1g006155m	Putative_R-Genes,_predicted_from_Pythozome	Citrus sinensis	RLK-GNK2			cysteine-rich RLK (RECEPTOR-like protein kinase) 29 (best arabidopsis hit)
Ghir_A09G007770	PRGDB00176768	51.7	636	294	5	61	1968	1	623	1.3e-178	626.3	29842.m003674	Putative_R-Genes,_predicted_from_Pythozome	Oryza barthii	RLK-GNK2			cysteine-rich RLK (RECEPTOR-like protein kinase) 26 (best arabidopsis hit)
Ghir_A09G007810	PRGDB00078970	31	248	154	5	1049	1777	1120	1355	2.5e-24	114.4	Vvi.20745	Putative_R-Genes,_predicted_from_NCBI_UniGene	Vitis vinifera	CNL	225447515	XM_002268092	PREDICTED: Vitis vinifera hypothetical protein LOC100252764 (LOC100252764), mRNA
Ghir_A09G008080	PRGDB00070731	55.2	87	38	1	444	704	1	86	1.4e-18	94.4	Mdo.689	Putative_R-Genes,_predicted_from_NCBI_UniGene	Malus x domestica	T	292668962	GU732467	Malus x domestica AP2 domain class transcription factor (AP2D43) mRNA, complete cds
Ghir_A09G008210	PRGDB00188415	50.3	710	291	13	623	2749	5	653	7e-175	614.4	Gma.18451	Putative_R-Genes,_predicted_from_NCBI_UniGene	Glycine max	RLP	356528327	XM_003532708	PREDICTED: Glycine max probable LRR receptor-like serine
Ghir_A09G008780	PRGDB00182795	39.3	168	98	3	186	680	1081	1247	7.6e-26	117.9	GSVIVT01000058001	Putative_R-Genes,_predicted_from_Pythozome	Vitis vinifera	RLP			Leucine-rich repeat protein kinase family protein (best arabidopsis hit)
Ghir_A09G009220	PRGDB00183040	44.6	56	27	2	1701	1865	604	656	1e-07	58.5	GSVIVT01007793001	Putative_R-Genes,_predicted_from_Pythozome	Vitis vinifera	NL			RING/U-box superfamily protein (best arabidopsis hit)
Ghir_A09G009240	PRGDB00217072	55.5	211	92	1	841	1467	1199	1409	8.8e-63	241.1	MDP0000261726	Putative_R-Genes,_predicted_from_Pythozome	Malus x domestica	RLP
Ghir_A09G009290	PRGDB00216326	24.5	196	146	2	971	1558	776	969	3.7e-14	80.5	MDP0000255780	Putative_R-Genes,_predicted_from_Pythozome	Malus x domestica	RLP
Ghir_A09G009390	PRGDB00213322	30.6	134	86	4	418	819	798	924	1.1e-06	54.7	MDP0000279719	Putative_R-Genes,_predicted_from_Pythozome	Malus x domestica	NL
Ghir_A09G009900	PRGDB00201227	45.6	103	55	1	124	432	804	905	3.2e-14	80.1	Bra026094	Putative_R-Genes,_predicted_from_Pythozome	Brassica rapa	CNL
Ghir_A09G009950	PRGDB00070731	49.3	69	35	0	375	581	13	81	6.7e-10	64.7	Mdo.689	Putative_R-Genes,_predicted_from_NCBI_UniGene	Malus x domestica	T	292668962	GU732467	Malus x domestica AP2 domain class transcription factor (AP2D43) mRNA, complete cds
Ghir_A09G009960	PRGDB00146828	27.3	425	254	12	508	1638	82	499	2.1e-34	147.1	Bradi3g17760.2	Putative_R-Genes,_predicted_from_Pythozome	Ricinus communis	RLP			Pyridoxal phosphate (PLP)-dependent transferases superfamily protein (best arabidopsis hit); SHR5-receptor-like kinase, putative (best rice hit)
Ghir_A09G010020	PRGDB00170967	44.3	88	48	1	802	1062	696	783	6.2e-12	72.4	LOC_Os07g14820.1	Putative_R-Genes,_predicted_from_Pythozome	Oryza sativa	RLP			Leucine-rich repeat protein kinase family protein (best arabidopsis hit)
Ghir_A09G010460	PRGDB00181635	52	171	79	3	52	558	14	183	3.7e-44	179.1	Si025833m	Putative_R-Genes,_predicted_from_Pythozome	Setaria italica	NL			NAC domain containing protein 90 (best arabidopsis hit); NBS-LRR disease resistance protein, putative, expressed (best rice hit)
Ghir_A09G010460.2	PRGDB00181635	55.6	133	57	2	52	447	14	145	2.8e-36	152.9	Si025833m	Putative_R-Genes,_predicted_from_Pythozome	Setaria italica	NL			NAC domain containing protein 90 (best arabidopsis hit); NBS-LRR disease resistance protein, putative, expressed (best rice hit)
Ghir_A09G010710	PRGDB00176060	66.5	962	296	3	593	3475	14	950	0	1281.5	POPTR_0009s02550.1	Putative_R-Genes,_predicted_from_Pythozome	Populus trichocarpa	RLP			transmembrane kinase 1 (best arabidopsis hit)
Ghir_A09G010810	PRGDB00079067	30	397	254	11	62	1198	936	1326	1.1e-40	167.5	Vvi.24747	Putative_R-Genes,_predicted_from_NCBI_UniGene	Vitis vinifera	NL	225424433	XM_002281516	PREDICTED: Vitis vinifera hypothetical protein LOC100249092 (LOC100249092), mRNA
Ghir_A09G010820	PRGDB00079067	34.6	402	240	10	213	1382	936	1326	2.6e-54	213	Vvi.24747	Putative_R-Genes,_predicted_from_NCBI_UniGene	Vitis vinifera	NL	225424433	XM_002281516	PREDICTED: Vitis vinifera hypothetical protein LOC100249092 (LOC100249092), mRNA
Ghir_A09G011150	PRGDB00186755	55.8	52	19	1	925	1068	1141	1192	4.7e-07	56.6		Putative_R-Genes,_collected_from_NCBI_Protein	Vitis vinifera	CNL	359494547	XM_003634755	PREDICTED: Vitis vinifera putative disease resistance protein RGA3-like (LOC100852663), mRNA.
Ghir_A09G011150.1	PRGDB00186755	55.8	52	19	1	905	1048	1141	1192	4.6e-07	56.6		Putative_R-Genes,_collected_from_NCBI_Protein	Vitis vinifera	CNL	359494547	XM_003634755	PREDICTED: Vitis vinifera putative disease resistance protein RGA3-like (LOC100852663), mRNA.
Ghir_A09G011180	PRGDB00217736	43.5	168	76	2	146	592	170	337	6.1e-29	129	Thhalv10027748m	Putative_R-Genes,_predicted_from_Pythozome	Eutrema halophilum	TNL
Ghir_A09G011380	PRGWK00002314	53.8	160	66	2	167	628	55	212	9.2e-38	157.1	Sotub11g029390.1.1	Contributed_R-Genes	Solanum tuberosum	CNL
Ghir_A09G011650	PRGDB00213322	31.9	320	194	9	242	1180	794	1096	3.2e-43	176	MDP0000279719	Putative_R-Genes,_predicted_from_Pythozome	Malus x domestica	NL
Ghir_A09G011680	PRGDB00192459	61.9	336	118	5	211	1194	141	474	1e-113	409.8	Mtr.22577	Putative_R-Genes,_predicted_from_NCBI_UniGene	Medicago truncatula	CNL	357509266	XM_003624874	Medicago truncatula NB-LRR type disease resistance protein (MTR_7g089080) mRNA, complete cds
Ghir_A09G011710	PRGDB00184447	54.8	62	28	0	310	495	1038	1099	5.3e-15	82.8	GSVIVT01036582001	Putative_R-Genes,_predicted_from_Pythozome	Vitis vinifera	NL			LRR and NB-ARC domains-containing disease resistance protein (best arabidopsis hit)
Ghir_A09G011720.1	PRGDB00184447	54.8	62	28	0	310	495	1038	1099	8.5e-15	82.8	GSVIVT01036582001	Putative_R-Genes,_predicted_from_Pythozome	Vitis vinifera	NL			LRR and NB-ARC domains-containing disease resistance protein (best arabidopsis hit)
Ghir_A09G011960	PRGDB00170967	39.4	127	59	1	2153	2479	657	783	1.4e-17	92	LOC_Os07g14820.1	Putative_R-Genes,_predicted_from_Pythozome	Oryza sativa	RLP			Leucine-rich repeat protein kinase family protein (best arabidopsis hit)
Ghir_A09G012070.1	PRGDB00176022	71	614	173	3	1029	2864	86	696	4.1e-256	884.4	POPTR_0009s05580.1	Putative_R-Genes,_predicted_from_Pythozome	Populus trichocarpa	N			ABC-2 type transporter family protein (best arabidopsis hit)
Ghir_A09G012340	PRGDB00049933	48.6	251	119	3	760	1500	1037	1281	3.1e-57	223	Os10g0370100	Putative_R-Genes,_collected_from_NCBI_Protein	Oryza sativa Japonica Group	NL	115481725	NM_001070991	Oryza sativa (japonica cultivar-group) Os10g0370100 (Os10g0370100) mRNA, complete cds.
Ghir_A09G012340.2	PRGDB00049933	52.5	139	64	1	1384	1794	1143	1281	1.2e-33	144.8	Os10g0370100	Putative_R-Genes,_collected_from_NCBI_Protein	Oryza sativa Japonica Group	NL	115481725	NM_001070991	Oryza sativa (japonica cultivar-group) Os10g0370100 (Os10g0370100) mRNA, complete cds.
Ghir_A09G012460	PRGDB00206219	52	50	22	2	1134	1277	16	65	1.8e-07	57.8	Lus10043428	Putative_R-Genes,_predicted_from_Pythozome	Linum usitatissimum	N
Ghir_A09G012480	PRGDB00152205	70.7	670	167	9	286	2223	1	665	2.2e-265	914.8	orange1.1g005754m	Putative_R-Genes,_predicted_from_Pythozome	Citrus sinensis	N			ATP-binding casette family G25 (best arabidopsis hit)
Ghir_A09G012580	PRGDB00176361	59.5	946	343	9	16	2748	14	954	1.2e-290	998.8	29728.m000836	Putative_R-Genes,_predicted_from_Pythozome	Oryza barthii	RLP			leucine-rich repeat transmembrane protein kinase family protein (best arabidopsis hit)
Ghir_A09G012580.1	PRGDB00176361	60.5	942	360	7	318	3122	14	950	3.3e-298	1024.2	29728.m000836	Putative_R-Genes,_predicted_from_Pythozome	Oryza barthii	RLP			leucine-rich repeat transmembrane protein kinase family protein (best arabidopsis hit)
Ghir_A09G012590	PRGDB00176361	51.5	653	305	7	318	2255	14	661	1.2e-158	560.5	29728.m000836	Putative_R-Genes,_predicted_from_Pythozome	Oryza barthii	RLP			leucine-rich repeat transmembrane protein kinase family protein (best arabidopsis hit)
Ghir_A09G013140	PRGDB00174864	75.3	889	216	2	614	3271	1	888	0	1312	POPTR_0006s05020.1	Putative_R-Genes,_predicted_from_Pythozome	Populus trichocarpa	RLP			Leucine-rich repeat protein kinase family protein (best arabidopsis hit)
Ghir_A09G013220.1	PRGDB00213757	64	25	9	0	691	765	698	722	0.25	36.6	MDP0000162676	Putative_R-Genes,_predicted_from_Pythozome	Malus x domestica	RLP
Ghir_A09G013340	PRGDB00149218	73.6	889	228	4	252	2912	5	888	0	1280.8	clementine0.9_001976m	Putative_R-Genes,_predicted_from_Pythozome	Citrus clementina	RLP			Leucine-rich repeat receptor-like protein kinase family protein (best arabidopsis hit)
Ghir_A09G013490	PRGDB00206819	43.8	105	59	0	3634	3948	224	328	1.5e-15	86.3	LOC_Os10g17724.1	Putative_R-Genes,_predicted_from_Pythozome	Oryza sativa	NL
Ghir_A09G013490.9	PRGDB00206819	43.8	105	59	0	2310	2624	224	328	1.2e-15	86.3	LOC_Os10g17724.1	Putative_R-Genes,_predicted_from_Pythozome	Oryza sativa	NL
Ghir_A09G013740	PRGDB00177734	50	44	19	1	721	852	197	237	1.3e-06	54.7	30138.m004038	Putative_R-Genes,_predicted_from_Pythozome	Oryza barthii	N			Protein kinase superfamily protein (best arabidopsis hit)
Ghir_A09G014110	PRGDB00178750	75.4	748	178	3	53	2296	1	742	0	1092.8	POPTR_0016s06620.1	Putative_R-Genes,_predicted_from_Pythozome	Populus trichocarpa	N			ABC-2 type transporter family protein (best arabidopsis hit)
Ghir_A09G014110.2	PRGDB00178750	71.5	471	128	3	471	1883	1	465	4.1e-182	638.6	POPTR_0016s06620.1	Putative_R-Genes,_predicted_from_Pythozome	Populus trichocarpa	N			ABC-2 type transporter family protein (best arabidopsis hit)
Ghir_A09G014270	PRGDB00079067	36.6	404	228	11	145	1311	936	1326	2e-59	229.9	Vvi.24747	Putative_R-Genes,_predicted_from_NCBI_UniGene	Vitis vinifera	NL	225424433	XM_002281516	PREDICTED: Vitis vinifera hypothetical protein LOC100249092 (LOC100249092), mRNA
Ghir_A09G014280.1	PRGDB00079067	31.9	411	261	10	243	1439	935	1338	3.2e-45	182.6	Vvi.24747	Putative_R-Genes,_predicted_from_NCBI_UniGene	Vitis vinifera	NL	225424433	XM_002281516	PREDICTED: Vitis vinifera hypothetical protein LOC100249092 (LOC100249092), mRNA
Ghir_A09G014320	PRGDB00166395	70	947	258	6	28	2814	20	958	0	1286.2	cassava4.1_001075m	Putative_R-Genes,_predicted_from_Pythozome	Vitis aestivalis	RLP			Leucine-rich repeat protein kinase family protein (best arabidopsis hit)
Ghir_A09G014320.1	PRGDB00166395	70.4	757	199	5	657	2873	209	958	8.9e-296	1016.1	cassava4.1_001075m	Putative_R-Genes,_predicted_from_Pythozome	Vitis aestivalis	RLP			Leucine-rich repeat protein kinase family protein (best arabidopsis hit)
Ghir_A09G014690	PRGDB00216033	58.1	215	73	4	2183	2788	1	211	2.4e-63	243.8	MDP0000314577	Putative_R-Genes,_predicted_from_Pythozome	Malus x domestica	RLP
Ghir_A09G014790	PRGDB00182795	37.5	224	128	6	181	828	1052	1271	1.4e-34	146.7	GSVIVT01000058001	Putative_R-Genes,_predicted_from_Pythozome	Vitis vinifera	RLP			Leucine-rich repeat protein kinase family protein (best arabidopsis hit)
Ghir_A09G015330	PRGDB00213092	57.9	228	93	3	93	773	51	276	7.9e-77	287	MDP0000278380	Putative_R-Genes,_predicted_from_Pythozome	Malus x domestica	Other
Ghir_A09G015640	PRGDB00182255	49	49	25	0	2788	2934	1621	1669	9.5e-07	56.2	441722	Putative_R-Genes,_predicted_from_Pythozome	Selaginella moellendorffii	N			pleiotropic drug resistance 12 (best arabidopsis hit)
Ghir_A09G015960	PRGDB00062347	41.1	95	50	3	5227	5502	163	254	3.7e-10	68.2	E3 ligase	Putative_R-Genes,_collected_from_NCBI_Protein	Oryza sativa Japonica Group	N	324029072	HQ123582	Oryza sativa Japonica Group cultivar Taipei 309 E3 ligase (BBI1) gene, complete cds.
Ghir_A09G015990	PRGDB00214478	58.8	148	49	2	537	968	424	563	6.5e-39	161.4	MDP0000208730	Putative_R-Genes,_predicted_from_Pythozome	Malus x domestica	Mlo-like
Ghir_A09G016110	PRGDB00166219	81.4	908	162	4	509	3226	23	925	0	1491.1	cassava4.1_001236m	Putative_R-Genes,_predicted_from_Pythozome	Vitis aestivalis	RLP			Leucine-rich repeat protein kinase family protein (best arabidopsis hit)
Ghir_A09G016150	PRGDB00215095	30.7	538	338	9	79	1668	18	528	3.7e-64	245.7	MDP0000319352	Putative_R-Genes,_predicted_from_Pythozome	Malus x domestica	TNL
Ghir_A09G016530	PRGDB00049789	46.5	288	106	8	1070	1828	1	275	4.3e-60	232.6	putative RING zinc finger ankyrin protein	Putative_R-Genes,_collected_from_NCBI_Protein	Sorghum bicolor	N	190688725	EU810765	Sorghum bicolor clone BAC Sbb12448, complete sequence.
Ghir_A09G016580	PRGDB00167710	81.4	393	71	1	449	1627	878	1268	7.9e-178	624	Medtr2g047020.1	Putative_R-Genes,_predicted_from_Pythozome	Medicago truncatula	TNL			heat shock cognate protein 70-1 (best arabidopsis hit)
Ghir_A09G016880	PRGDB00183352	23.3	404	243	12	1028	2170	1092	1451	8.1e-19	95.9	GSVIVT01015461001	Putative_R-Genes,_predicted_from_Pythozome	Vitis vinifera	N			pleiotropic drug resistance 12 (best arabidopsis hit)
Ghir_A09G016900	PRGDB00189838	54.5	319	136	3	1171	2124	1258	1568	1.1e-94	347.8	Hv.34616	Putative_R-Genes,_predicted_from_NCBI_UniGene	Hordeum vulgare	NL	326530114	AK377143	Hordeum vulgare subsp. vulgare mRNA for predicted protein, partial cds, clone: NIASHv3149K09
Ghir_A09G017110	PRGDB00162919	53.3	45	21	0	442	576	670	714	2e-07	57.4	Egrandis_v1_0.004137m	Putative_R-Genes,_predicted_from_Pythozome	Areca catechu	TNL			disease resistance protein (TIR-NBS-LRR class), putative (best arabidopsis hit)
Ghir_A09G017130	PRGDB00184271	89.4	47	4	1	501	641	662	707	3e-17	90.1	GRMZM2G162531_T01	Putative_R-Genes,_predicted_from_Pythozome	Zea mays	RLP			STRUBBELIG-receptor family 8 (best arabidopsis hit); STRUBBELIG-RECEPTOR FAMILY 7 precursor, putative, expressed (best rice hit)
Ghir_A09G017160	PRGDB00180392	43.6	470	194	14	123	1418	696	1132	7.8e-92	337.8	Si039656m	Putative_R-Genes,_predicted_from_Pythozome	Setaria italica	N			white-brown complex homolog protein 11 (best arabidopsis hit); white-brown complex homolog protein 11, putative, expressed (best rice hit)
Ghir_A09G017590	PRGDB00216316	26.6	350	222	12	148	1179	33	353	1.3e-21	104.4	MDP0000248430	Putative_R-Genes,_predicted_from_Pythozome	Malus x domestica	N
Ghir_A09G017840	PRGDB00216326	21.2	236	170	5	575	1273	745	967	6e-10	65.5	MDP0000255780	Putative_R-Genes,_predicted_from_Pythozome	Malus x domestica	RLP
Ghir_A09G017960	PRGDB00201975	27.9	219	123	8	680	1291	180	378	3.3e-09	63.2	Bra036845	Putative_R-Genes,_predicted_from_Pythozome	Brassica rapa	CNL
Ghir_A09G018300	PRGDB00165191	49.7	157	79	0	362	832	794	950	1e-41	170.6	mgv1a000858m	Putative_R-Genes,_predicted_from_Pythozome	Cucumis x hytivus	NL			NB-ARC domain-containing disease resistance protein (best arabidopsis hit)
Ghir_A09G018390	PRGDB00163364	38.8	103	54	1	3229	2948	1	103	3.2e-14	80.9	Egrandis_v1_0.049512m	Putative_R-Genes,_predicted_from_Pythozome	Areca catechu	T			Disease resistance protein (TIR-NBS-LRR class) family (best arabidopsis hit)
Ghir_A09G018440	PRGDB00216316	28.2	266	160	8	556	1332	95	336	3.9e-15	82.8	MDP0000248430	Putative_R-Genes,_predicted_from_Pythozome	Malus x domestica	N
Ghir_A09G018440.1	PRGDB00216316	32.5	120	73	2	1990	2349	225	336	2e-08	61.2	MDP0000248430	Putative_R-Genes,_predicted_from_Pythozome	Malus x domestica	N
Ghir_A09G018640	PRGDB00211657	54.5	55	25	0	287	451	670	724	9.2e-11	67.8	Eucgr.H02157.1	Putative_R-Genes,_predicted_from_Pythozome	Eucalyptus grandis	TNL
Ghir_A09G018790	PRGDB00186618	33.3	141	84	3	266	658	33	173	1.1e-09	64.3		Putative_R-Genes,_collected_from_NCBI_Protein	Brachypodium distachyon	NL	357127893	XM_003565564	PREDICTED: Brachypodium distachyon disease resistance protein RPH8A-like (LOC100842838), mRNA.
Ghir_A09G018830	PRGDB00148966	68.2	1298	358	3	218	3949	1	1297	0	1739.2	evm.model.supercontig_107.30	Putative_R-Genes,_predicted_from_Pythozome	Arabidopsis lyrata subsp. lyrata	RLP			Leucine-rich repeat transmembrane protein kinase (best arabidopsis hit)
Ghir_A09G018990	PRGDB00215944	59.6	250	80	3	568	1254	1529	1778	2.9e-78	292.4	MDP0000282838	Putative_R-Genes,_predicted_from_Pythozome	Malus x domestica	CN
Ghir_A09G019110	PRGDB00206876	26	512	358	9	614	2116	1598	2099	2.7e-48	193.7	LOC_Os01g33260.1	Putative_R-Genes,_predicted_from_Pythozome	Oryza sativa	N
Ghir_A09G019160.1	PRGDB00182255	47.3	169	62	2	293	799	1528	1669	1.5e-32	141	441722	Putative_R-Genes,_predicted_from_Pythozome	Selaginella moellendorffii	N			pleiotropic drug resistance 12 (best arabidopsis hit)
Ghir_A09G019360	PRGDB00079067	38.5	96	59	0	1051	1338	922	1017	2e-13	78.2	Vvi.24747	Putative_R-Genes,_predicted_from_NCBI_UniGene	Vitis vinifera	NL	225424433	XM_002281516	PREDICTED: Vitis vinifera hypothetical protein LOC100249092 (LOC100249092), mRNA
Ghir_A09G019360.2	PRGDB00079067	38.5	96	59	0	1051	1338	922	1017	2.6e-13	78.2	Vvi.24747	Putative_R-Genes,_predicted_from_NCBI_UniGene	Vitis vinifera	NL	225424433	XM_002281516	PREDICTED: Vitis vinifera hypothetical protein LOC100249092 (LOC100249092), mRNA
Ghir_A09G019490	PRGDB00177091	53.5	99	43	2	385	678	271	367	1.4e-21	105.1	POPTR_0818s00195.1	Putative_R-Genes,_predicted_from_Pythozome	Populus trichocarpa	T			NAC domain containing protein 17 (best arabidopsis hit)
Ghir_A09G019510	PRGDB00183040	51	49	24	0	503	649	603	651	2.4e-10	66.2	GSVIVT01007793001	Putative_R-Genes,_predicted_from_Pythozome	Vitis vinifera	NL			RING/U-box superfamily protein (best arabidopsis hit)
Ghir_A09G019570	PRGDB00189168	33.9	224	141	4	727	1395	83	300	1.2e-32	141.7	Gma.63188	Putative_R-Genes,_predicted_from_NCBI_UniGene	Glycine max	RLP	356523477	XM_003530317	PREDICTED: Glycine max protein STRUBBELIG-RECEPTOR FAMILY 5-like (LOC100785529), mRNA
Ghir_A09G019570.1	PRGDB00189168	33.9	224	141	4	727	1395	83	300	2.2e-32	141.7	Gma.63188	Putative_R-Genes,_predicted_from_NCBI_UniGene	Glycine max	RLP	356523477	XM_003530317	PREDICTED: Glycine max protein STRUBBELIG-RECEPTOR FAMILY 5-like (LOC100785529), mRNA
Ghir_A09G019610	PRGDB00216981	29.9	134	89	5	2519	2914	283	413	1.1e-06	55.8	MDP0000297928	Putative_R-Genes,_predicted_from_Pythozome	Malus x domestica	RLP
Ghir_A09G019780	PRGDB00213363	78.6	42	9	0	2136	2261	1364	1405	4.6e-13	77	MDP0000265619	Putative_R-Genes,_predicted_from_Pythozome	Malus x domestica	N
Ghir_A09G019910	PRGDB00070731	37.3	75	47	0	682	906	8	82	4.2e-06	52.8	Mdo.689	Putative_R-Genes,_predicted_from_NCBI_UniGene	Malus x domestica	T	292668962	GU732467	Malus x domestica AP2 domain class transcription factor (AP2D43) mRNA, complete cds
Ghir_A09G019960	PRGDB00070731	54.2	83	35	2	1168	1413	25	105	2e-16	87.4	Mdo.689	Putative_R-Genes,_predicted_from_NCBI_UniGene	Malus x domestica	T	292668962	GU732467	Malus x domestica AP2 domain class transcription factor (AP2D43) mRNA, complete cds
Ghir_A09G020080	PRGDB00216316	66.7	27	9	0	2426	2506	278	304	0.045	40.4	MDP0000248430	Putative_R-Genes,_predicted_from_Pythozome	Malus x domestica	N
Ghir_A09G020200	PRGDB00183702	75.4	57	14	0	1290	1460	1247	1303	3.1e-19	96.7	GSVIVT01023015001	Putative_R-Genes,_predicted_from_Pythozome	Vitis vinifera	NL			NB-ARC domain-containing disease resistance protein (best arabidopsis hit)
Ghir_A09G020380	PRGDB00181372	54.4	263	120	0	930	1718	17	279	8.5e-82	304.7	Si005894m	Putative_R-Genes,_predicted_from_Pythozome	Setaria italica	CN			U-box domain-containing protein kinase family protein (best arabidopsis hit); protein kinase, putative, expressed (best rice hit)
Ghir_A09G020420	PRGDB00143286	66	374	93	3	261	1364	1507	1852	2.5e-131	468.8	334514	Putative_R-Genes,_predicted_from_Pythozome	Arabidopsis lyrata	NL			Disease resistance protein (CC-NBS-LRR class) family (best arabidopsis hit)
Ghir_A09G020530	PRGDB00070731	48.3	58	29	1	815	988	26	82	4.7e-09	62.4	Mdo.689	Putative_R-Genes,_predicted_from_NCBI_UniGene	Malus x domestica	T	292668962	GU732467	Malus x domestica AP2 domain class transcription factor (AP2D43) mRNA, complete cds
Ghir_A09G020910	PRGDB00176618	78.7	596	126	1	603	2387	1	596	1.1e-276	952.6	29827.m002612	Putative_R-Genes,_predicted_from_Pythozome	Oryza barthii	RLP			Leucine-rich repeat protein kinase family protein (best arabidopsis hit)
Ghir_A09G020960	PRGDB00062544	61.4	44	17	0	928	1059	1001	1044	2.7e-08	59.7	cc-nbs-lrr resistance protein	Putative_R-Genes,_collected_from_NCBI_Protein	Populus trichocarpa	NL	116047840	CM000338	Populus trichocarpa linkage group II, whole genome shotgun sequence.
Ghir_A09G020960.1	PRGDB00062544	66.7	54	18	0	1208	1369	991	1044	2.5e-13	77	cc-nbs-lrr resistance protein	Putative_R-Genes,_collected_from_NCBI_Protein	Populus trichocarpa	NL	116047840	CM000338	Populus trichocarpa linkage group II, whole genome shotgun sequence.
Ghir_A09G021090	PRGDB00177009	71	1072	307	2	524	3733	37	1106	0	1513.4	29904.m003011	Putative_R-Genes,_predicted_from_Pythozome	Oryza barthii	RLP			Leucine-rich repeat receptor-like protein kinase family protein (best arabidopsis hit)
Ghir_A09G021190	PRGDB00078970	40.4	255	136	5	767	1498	1112	1361	6e-40	166	Vvi.20745	Putative_R-Genes,_predicted_from_NCBI_UniGene	Vitis vinifera	CNL	225447515	XM_002268092	PREDICTED: Vitis vinifera hypothetical protein LOC100252764 (LOC100252764), mRNA
Ghir_A09G021540	PRGDB00214085	65.6	90	31	0	82	351	249	338	8.8e-29	128.3	MDP0000194411	Putative_R-Genes,_predicted_from_Pythozome	Malus x domestica	N
Ghir_A09G021650	PRGDB00148403	27.1	177	117	3	73	588	1457	1626	3.8e-08	58.2	clementine0.9_035959m	Putative_R-Genes,_predicted_from_Pythozome	Citrus clementina	CNL			NB-ARC domain-containing disease resistance protein (best arabidopsis hit)
Ghir_A09G021850.1	PRGDB00214485	50.6	344	139	1	658	1596	636	979	1.5e-100	366.7	MDP0000287433	Putative_R-Genes,_predicted_from_Pythozome	Malus x domestica	CN
Ghir_A09G021860	PRGDB00175650	65.9	986	309	4	354	3236	21	1004	0	1266.5	POPTR_0014s14440.1	Putative_R-Genes,_predicted_from_Pythozome	Populus trichocarpa	RLP			Leucine-rich receptor-like protein kinase family protein (best arabidopsis hit)
Ghir_A09G022330	PRGDB00149350	57.3	935	371	11	395	3184	2	913	4.2e-302	1037.3	clementine0.9_036014m	Putative_R-Genes,_predicted_from_Pythozome	Citrus clementina	CNL			NB-ARC domain-containing disease resistance protein (best arabidopsis hit)
Ghir_A09G022420.1	PRGDB00183046	32.8	134	86	2	1395	1787	790	922	1.6e-12	75.1	GSVIVT01008201001	Putative_R-Genes,_predicted_from_Pythozome	Vitis vinifera	NL			calcium sensing receptor (best arabidopsis hit)
Ghir_A09G022850.1	PRGDB00194196	23.6	365	264	7	1176	2240	569	928	6.4e-22	106.3	Pin.4094	Putative_R-Genes,_predicted_from_NCBI_UniGene	Phytophthora infestans	N	301122438	XM_002908900	Phytophthora infestans T30-4 dihydroflavonol-4-reductase, putative (PITG_00333) mRNA, complete cds
Ghir_A09G022880	PRGDB00201715	57.4	188	75	3	1077	1637	1176	1359	4.8e-54	212.2	Bra001175	Putative_R-Genes,_predicted_from_Pythozome	Brassica rapa	TNL
Ghir_A09G023470	PRGDB00217736	38.1	160	85	1	118	555	173	332	2.2e-24	112.5	Thhalv10027748m	Putative_R-Genes,_predicted_from_Pythozome	Eutrema halophilum	TNL
Ghir_A09G023510	PRGDB00202169	28.3	120	80	3	208	552	17	135	2.8e-07	55.8	Bra007015	Putative_R-Genes,_predicted_from_Pythozome	Brassica rapa	RLP
Ghir_A09G023950	PRGDB00207410	49.4	168	81	1	1464	1955	343	510	1.3e-36	154.8	Aquca_009_00902.1	Putative_R-Genes,_predicted_from_Pythozome	Aquilegia coerulea	RLP
Ghir_A09G024120.1	PRGDB00215267	43.1	253	137	4	308	1048	298	549	2.5e-54	213	MDP0000256952	Putative_R-Genes,_predicted_from_Pythozome	Malus x domestica	RLP
Ghir_A09G024410	PRGDB00143462	54.8	1058	343	13	15	3047	860	1829	0	1102	493465	Putative_R-Genes,_predicted_from_Pythozome	Arabidopsis lyrata	TNL			Regulator of chromosome condensation (RCC1) family protein (best arabidopsis hit)
Ghir_A09G024630	PRGDB00215142	27.9	315	166	9	881	1702	717	1011	2.9e-25	117.1	MDP0000277457	Putative_R-Genes,_predicted_from_Pythozome	Malus x domestica	RLP
Ghir_A09G024820	PRGDB00217736	26.7	90	64	1	141	410	360	447	0.035	38.9	Thhalv10027748m	Putative_R-Genes,_predicted_from_Pythozome	Eutrema halophilum	TNL
Ghir_A09G024830	PRGDB00189838	58.3	321	132	2	642	1601	1254	1573	3.9e-105	382.1	Hv.34616	Putative_R-Genes,_predicted_from_NCBI_UniGene	Hordeum vulgare	NL	326530114	AK377143	Hordeum vulgare subsp. vulgare mRNA for predicted protein, partial cds, clone: NIASHv3149K09
Ghir_A09G024830.1	PRGDB00189838	58.3	321	132	2	287	1246	1254	1573	3.3e-105	382.1	Hv.34616	Putative_R-Genes,_predicted_from_NCBI_UniGene	Hordeum vulgare	NL	326530114	AK377143	Hordeum vulgare subsp. vulgare mRNA for predicted protein, partial cds, clone: NIASHv3149K09
Ghir_A09G025040	PRGDB00070731	49.1	57	29	0	423	593	26	82	1.6e-09	63.9	Mdo.689	Putative_R-Genes,_predicted_from_NCBI_UniGene	Malus x domestica	T	292668962	GU732467	Malus x domestica AP2 domain class transcription factor (AP2D43) mRNA, complete cds
Ghir_A09G025170	PRGDB00183040	47.6	82	42	1	666	908	577	658	3.7e-16	86.3	GSVIVT01007793001	Putative_R-Genes,_predicted_from_Pythozome	Vitis vinifera	NL			RING/U-box superfamily protein (best arabidopsis hit)
Ghir_A09G025350	PRGDB00204912	23.4	231	148	7	303	944	515	733	1.9e-06	53.5	Lus10017408	Putative_R-Genes,_predicted_from_Pythozome	Linum usitatissimum	CN
Ghir_A09G025480	PRGDB00200719	28.1	128	71	2	211	594	131	237	0.013	41.6	Bra005270	Putative_R-Genes,_predicted_from_Pythozome	Brassica rapa	CNL
Ghir_A09G025610	PRGDB00211657	45.1	51	28	0	386	538	670	720	6.3e-07	55.1	Eucgr.H02157.1	Putative_R-Genes,_predicted_from_Pythozome	Eucalyptus grandis	TNL
Ghir_A09G025940.1	PRGDB00204891	79.2	106	22	0	112	429	876	981	1e-44	180.6	Lus10020500	Putative_R-Genes,_predicted_from_Pythozome	Linum usitatissimum	RLP
Ghir_A09G025970	PRGDB00216326	25.2	163	111	4	883	1356	811	967	2.4e-11	70.5	MDP0000255780	Putative_R-Genes,_predicted_from_Pythozome	Malus x domestica	RLP
Ghir_A09G025980.2	PRGDB00216257	64.6	48	17	0	2561	2704	1149	1196	1.7e-08	61.6	MDP0000284789	Putative_R-Genes,_predicted_from_Pythozome	Malus x domestica	NL
Ghir_A09G026000	PRGDB00213404	52.6	78	36	1	1104	1337	137	213	1.2e-17	91.7	MDP0000386970	Putative_R-Genes,_predicted_from_Pythozome	Malus x domestica	CNL
Ghir_A09G026290	PRGDB00214226	41.1	265	99	10	76	780	761	998	1.4e-31	136.3	MDP0000309192	Putative_R-Genes,_predicted_from_Pythozome	Malus x domestica	CNL
Ghir_A10G000320	PRGDB00178497	57.8	1059	432	5	758	3910	53	1104	0	1187.2	POPTR_0008s00970.1	Putative_R-Genes,_predicted_from_Pythozome	Populus trichocarpa	RLP			PEP1 receptor 1 (best arabidopsis hit)
Ghir_A10G000650	PRGDB00153580	74.4	718	176	4	326	2470	9	721	5e-303	1040	orange1.1g005001m	Putative_R-Genes,_predicted_from_Pythozome	Citrus sinensis	RLP			STRUBBELIG-receptor family 8 (best arabidopsis hit)
Ghir_A10G000810	PRGDB00216316	70.3	185	38	3	5208	5738	194	369	1.9e-61	238.4	MDP0000248430	Putative_R-Genes,_predicted_from_Pythozome	Malus x domestica	N
Ghir_A10G001000	PRGDB00204891	38.3	128	71	3	1215	1595	1020	1140	1.2e-18	94.7	Lus10020500	Putative_R-Genes,_predicted_from_Pythozome	Linum usitatissimum	RLP
Ghir_A10G001120	PRGDB00184336	36	356	197	5	850	1827	335	689	8.2e-50	198.4	GSVIVT01034745001	Putative_R-Genes,_predicted_from_Pythozome	Vitis vinifera	N			pleiotropic drug resistance 11 (best arabidopsis hit)
Ghir_A10G001200.1	PRGDB00172968	58	643	206	10	382	2139	29	664	1.6e-203	709.1	ppa002516m	Putative_R-Genes,_predicted_from_Pythozome	Prunus persica	RLK-GNK2			cysteine-rich RLK (RECEPTOR-like protein kinase) 25 (best arabidopsis hit)
Ghir_A10G001220.1	PRGDB00216779	57.8	45	19	0	2419	2553	1103	1147	4e-07	57	MDP0000600203	Putative_R-Genes,_predicted_from_Pythozome	Malus x domestica	RLP
Ghir_A10G001370	PRGDB00202493	66	53	18	0	899	1057	839	891	5.9e-13	75.9	Bra030622	Putative_R-Genes,_predicted_from_Pythozome	Brassica rapa	RLP
Ghir_A10G001390	PRGDB00191296	29.8	248	167	4	551	1282	277	521	6e-18	92.4	Lsa.44031	Putative_R-Genes,_predicted_from_NCBI_UniGene	Lactuca sativa	N	329679120	JI581626	TSA: Lactuca sativa CLC_LTR_V1A_17001 mRNA sequence
Ghir_A10G001710	PRGDB00189344	37.6	93	51	3	1212	1475	1167	1257	1.9e-08	61.6	Hv.10056	Putative_R-Genes,_predicted_from_NCBI_UniGene	Hordeum vulgare	NL	326521753	AK369251	Hordeum vulgare subsp. vulgare mRNA for predicted protein, complete cds, clone: NIASHv2087M16
Ghir_A10G001790	PRGDB00171933	49.3	144	73	0	186	617	691	834	2.3e-34	147.9	LOC_Os11g27450.1	Putative_R-Genes,_predicted_from_Pythozome	Oryza sativa	NL			RNI-like superfamily protein (best arabidopsis hit)
Ghir_A10G001920	PRGDB00216326	60.3	599	175	8	1	1728	711	1269	2.2e-202	705.7	MDP0000255780	Putative_R-Genes,_predicted_from_Pythozome	Malus x domestica	RLP
Ghir_A10G001930	PRGDB00148810	55.2	762	295	10	285	2555	1	721	1.1e-220	766.5	clementine0.9_003588m	Putative_R-Genes,_predicted_from_Pythozome	Citrus clementina	RLP			Leucine-rich repeat protein kinase family protein (best arabidopsis hit)
Ghir_A10G002050.1	PRGDB00217007	49.4	267	111	7	104	883	1	250	4.8e-59	228.4	MDP0000579910	Putative_R-Genes,_predicted_from_Pythozome	Malus x domestica	RLP
Ghir_A10G002060.1	PRGDB00215932	86.9	427	53	1	1448	2728	1319	1742	4.3e-213	741.9	MDP0000247856	Putative_R-Genes,_predicted_from_Pythozome	Malus x domestica	TNL
Ghir_A10G002430	PRGDB00070731	79.4	63	13	0	216	404	20	82	2.7e-22	106.3	Mdo.689	Putative_R-Genes,_predicted_from_NCBI_UniGene	Malus x domestica	T	292668962	GU732467	Malus x domestica AP2 domain class transcription factor (AP2D43) mRNA, complete cds
Ghir_A10G002440	PRGDB00070731	60.8	74	29	0	537	758	15	88	2.9e-18	94	Mdo.689	Putative_R-Genes,_predicted_from_NCBI_UniGene	Malus x domestica	T	292668962	GU732467	Malus x domestica AP2 domain class transcription factor (AP2D43) mRNA, complete cds
Ghir_A10G002500	PRGDB00153468	70.7	981	282	4	342	3272	24	1003	0	1383.2	orange1.1g001867m	Putative_R-Genes,_predicted_from_Pythozome	Citrus sinensis	RLP			HAESA-like 1 (best arabidopsis hit)
Ghir_A10G002540	PRGDB00183598	69.2	432	132	1	64	1356	22	453	8.3e-177	619.8	GSVIVT01021126001	Putative_R-Genes,_predicted_from_Pythozome	Vitis vinifera	Mlo-like			Seven transmembrane MLO family protein (best arabidopsis hit)
Ghir_A10G002590	PRGDB00202169	54.9	133	60	0	271	669	7	139	5.1e-36	151.8	Bra007015	Putative_R-Genes,_predicted_from_Pythozome	Brassica rapa	RLP
Ghir_A10G002720	PRGDB00204808	65.8	38	13	0	1070	1183	1829	1866	9.1e-08	58.5	GRMZM2G060054_T03	Putative_R-Genes,_predicted_from_Pythozome	Zea mays	CNL
Ghir_A10G002720.4	PRGDB00204808	58.8	68	28	0	1712	1915	1829	1896	5.1e-19	96.3	GRMZM2G060054_T03	Putative_R-Genes,_predicted_from_Pythozome	Zea mays	CNL
Ghir_A10G002840	PRGDB00216650	37.8	333	164	5	268	1221	940	1244	7.6e-67	254.6	MDP0000252094	Putative_R-Genes,_predicted_from_Pythozome	Malus x domestica	RLP
Ghir_A10G003110	PRGDB00191296	36.3	278	167	7	1346	2161	207	480	3e-28	127.1	Lsa.44031	Putative_R-Genes,_predicted_from_NCBI_UniGene	Lactuca sativa	N	329679120	JI581626	TSA: Lactuca sativa CLC_LTR_V1A_17001 mRNA sequence
Ghir_A10G003140	PRGDB00201186	68.9	90	28	0	796	1065	15	104	1.4e-34	147.1	Bra039669	Putative_R-Genes,_predicted_from_Pythozome	Brassica rapa	N
Ghir_A10G003220	PRGDB00047400	55	120	44	2	357	716	1050	1159	1.9e-29	130.2	TIR-NBS-TIR-TIR-WRKY type disease resistance protein	Putative_R-Genes,_collected_from_NCBI_Protein	Populus trichocarpa	TNL	105922709	DQ513218	Populus trichocarpa clone 196822 TIR-NBS-TIR-TIR-WRKY type disease resistance protein mRNA, complete cds.
Ghir_A10G003300	PRGDB00175796	79.2	616	116	4	354	2195	12	617	1.7e-280	964.9	POPTR_0004s05780.1	Putative_R-Genes,_predicted_from_Pythozome	Populus trichocarpa	RLP			Leucine-rich repeat protein kinase family protein (best arabidopsis hit)
Ghir_A10G003320	PRGDB00213491	56	50	21	1	1619	1768	877	925	5.8e-07	55.8	MDP0000220175	Putative_R-Genes,_predicted_from_Pythozome	Malus x domestica	NL
Ghir_A10G003430	PRGDB00149355	78.3	161	33	1	140	622	1418	1576	8e-70	265	clementine0.9_000252m	Putative_R-Genes,_predicted_from_Pythozome	Citrus clementina	CNL			NB-ARC domain-containing disease resistance protein (best arabidopsis hit)
Ghir_A10G003540	PRGDB00218046	49.4	158	67	5	418	888	343	488	8.1e-34	146	Thhalv10027276m	Putative_R-Genes,_predicted_from_Pythozome	Eutrema halophilum	TNL
Ghir_A10G003700	PRGDB00064617	49.2	59	30	0	820	996	55	113	3.6e-11	69.3	Zm.143017	Putative_R-Genes,_predicted_from_NCBI_UniGene	Zea mays	RLK	223973790	BT065207	Zea mays full-length cDNA clone ZM_BFb0035I10 mRNA, complete cds
Ghir_A10G004560	PRGDB00150359	65.5	1035	346	4	49	3138	17	1045	0	1354.3	clementine0.9_032663m	Putative_R-Genes,_predicted_from_Pythozome	Citrus clementina	RLP			Leucine-rich repeat transmembrane protein kinase (best arabidopsis hit)
Ghir_A10G004560.1	PRGDB00150359	64.1	1035	337	5	351	3368	17	1045	0	1307.4	clementine0.9_032663m	Putative_R-Genes,_predicted_from_Pythozome	Citrus clementina	RLP			Leucine-rich repeat transmembrane protein kinase (best arabidopsis hit)
Ghir_A10G004580	PRGDB00150359	63.2	1024	359	6	148	3204	35	1045	0	1284.2	clementine0.9_032663m	Putative_R-Genes,_predicted_from_Pythozome	Citrus clementina	RLP			Leucine-rich repeat transmembrane protein kinase (best arabidopsis hit)
Ghir_A10G004580.2	PRGDB00150359	63.1	1022	359	6	151	3201	35	1043	0	1281.9	clementine0.9_032663m	Putative_R-Genes,_predicted_from_Pythozome	Citrus clementina	RLP			Leucine-rich repeat transmembrane protein kinase (best arabidopsis hit)
Ghir_A10G004710	PRGDB00180410	55.7	681	280	7	734	2752	48	714	6.7e-210	730.7	Si034442m	Putative_R-Genes,_predicted_from_Pythozome	Setaria italica	RLP			STRUBBELIG-receptor family 6 (best arabidopsis hit); STRUBBELIG-RECEPTOR FAMILY 6 precursor, putative, expressed (best rice hit)
Ghir_A10G004870	PRGDB00070731	51.7	58	28	0	555	728	25	82	1.5e-10	68.6	Mdo.689	Putative_R-Genes,_predicted_from_NCBI_UniGene	Malus x domestica	T	292668962	GU732467	Malus x domestica AP2 domain class transcription factor (AP2D43) mRNA, complete cds
Ghir_A10G004870.1	PRGDB00070731	51.7	58	28	0	555	728	25	82	1.2e-10	68.6	Mdo.689	Putative_R-Genes,_predicted_from_NCBI_UniGene	Malus x domestica	T	292668962	GU732467	Malus x domestica AP2 domain class transcription factor (AP2D43) mRNA, complete cds
Ghir_A10G004940	PRGDB00188945	35.3	102	64	1	1134	1439	280	379	9.3e-09	62	Gma.56835	Putative_R-Genes,_predicted_from_NCBI_UniGene	Glycine max	RLP	356514530	XM_003525911	PREDICTED: Glycine max probable LRR receptor-like serine
Ghir_A10G004940.1	PRGDB00188945	35.2	105	66	1	1028	1342	276	378	8.9e-09	62	Gma.56835	Putative_R-Genes,_predicted_from_NCBI_UniGene	Glycine max	RLP	356514530	XM_003525911	PREDICTED: Glycine max probable LRR receptor-like serine
Ghir_A10G005030	PRGDB00201406	69.1	55	17	0	1318	1482	1145	1199	5.3e-15	82.8	Bra003867	Putative_R-Genes,_predicted_from_Pythozome	Brassica rapa	TNL
Ghir_A10G005330	PRGDB00079040	45.6	125	64	2	325	690	17	140	1.7e-20	100.5	Vvi.23988	Putative_R-Genes,_predicted_from_NCBI_UniGene	Vitis vinifera	RLP	225442062	XM_002272327	PREDICTED: Vitis vinifera hypothetical protein LOC100260039 (LOC100260039), mRNA
Ghir_A10G005610	PRGDB00213428	31.3	131	82	3	679	1059	1028	1154	5.9e-15	82.4	MDP0000525273	Putative_R-Genes,_predicted_from_Pythozome	Malus x domestica	CNL
Ghir_A10G005750	PRGDB00217808	33.8	154	100	1	399	854	29	182	1.9e-20	100.1	Thhalv10006389m	Putative_R-Genes,_predicted_from_Pythozome	Eutrema halophilum	RLP
Ghir_A10G005810	PRGDB00078803	30.1	229	145	3	1831	2475	370	597	9.8e-21	102.8	Vvi.12916	Putative_R-Genes,_predicted_from_NCBI_UniGene	Vitis vinifera	N	225452756	XM_002283015	PREDICTED: Vitis vinifera hypothetical protein LOC100262734 (LOC100262734), mRNA
Ghir_A10G005810.1	PRGDB00078803	30.1	229	145	3	2200	2844	370	597	1.1e-20	102.8	Vvi.12916	Putative_R-Genes,_predicted_from_NCBI_UniGene	Vitis vinifera	N	225452756	XM_002283015	PREDICTED: Vitis vinifera hypothetical protein LOC100262734 (LOC100262734), mRNA
Ghir_A10G005960	PRGDB00167788	77.3	119	27	0	261	617	37	155	3.7e-51	202.6	Medtr2g121840.1	Putative_R-Genes,_predicted_from_Pythozome	Medicago truncatula	RLP			Leucine-rich repeat transmembrane protein kinase protein (best arabidopsis hit)
Ghir_A10G006120	PRGDB00175298	61.1	208	78	3	2765	3385	454	659	1.6e-64	248.1	POPTR_0019s12850.1	Putative_R-Genes,_predicted_from_Pythozome	Populus trichocarpa	RLP			Leucine-rich repeat protein kinase family protein (best arabidopsis hit)
Ghir_A10G006120.1	PRGDB00175298	62.1	203	74	3	1356	1961	459	659	1.6e-64	247.3	POPTR_0019s12850.1	Putative_R-Genes,_predicted_from_Pythozome	Populus trichocarpa	RLP			Leucine-rich repeat protein kinase family protein (best arabidopsis hit)
Ghir_A10G006340.1	PRGDB00183425	76.9	1474	327	5	326	4705	21	1494	0	2299.2	GSVIVT01016999001	Putative_R-Genes,_predicted_from_Pythozome	Vitis vinifera	N			ABC-2 and Plant PDR ABC-type transporter family protein (best arabidopsis hit)
Ghir_A10G006410	PRGDB00156657	39	159	56	5	655	1008	126	284	2.7e-17	89.7	Glyma03g23250.1	Putative_R-Genes,_predicted_from_Pythozome	Glycine max	T			GATA transcription factor 2 (best arabidopsis hit)
Ghir_A10G006550	PRGDB00143462	36.6	322	188	7	701	1624	1084	1403	5.4e-49	195.7	493465	Putative_R-Genes,_predicted_from_Pythozome	Arabidopsis lyrata	TNL			Regulator of chromosome condensation (RCC1) family protein (best arabidopsis hit)
Ghir_A10G006590	PRGDB00181635	49.2	130	60	4	353	724	13	142	1.3e-26	121.3	Si025833m	Putative_R-Genes,_predicted_from_Pythozome	Setaria italica	NL			NAC domain containing protein 90 (best arabidopsis hit); NBS-LRR disease resistance protein, putative, expressed (best rice hit)
Ghir_A10G006900.10	PRGDB00149440	27.7	195	131	5	340	921	648	833	3.7e-12	74.7	clementine0.9_001644m	Putative_R-Genes,_predicted_from_Pythozome	Citrus clementina	N			ABC2 homolog 6 (best arabidopsis hit)
Ghir_A10G007320.1	PRGDB00149726	60.4	111	35	3	2488	2156	267	368	5.5e-27	122.9	clementine0.9_027452m	Putative_R-Genes,_predicted_from_Pythozome	Citrus clementina	NL			Disease resistance protein (CC-NBS-LRR class) family (best arabidopsis hit)
Ghir_A10G007390	PRGDB00215435	91.3	23	2	0	713	781	852	874	8.2e-07	55.8	MDP0000253531	Putative_R-Genes,_predicted_from_Pythozome	Malus x domestica	NL
Ghir_A10G007490	PRGDB00170967	33.3	102	64	1	554	859	685	782	2.7e-06	53.5	LOC_Os07g14820.1	Putative_R-Genes,_predicted_from_Pythozome	Oryza sativa	RLP			Leucine-rich repeat protein kinase family protein (best arabidopsis hit)
Ghir_A10G007520	PRGDB00163438	70.5	1436	411	3	396	4694	1	1427	0	2023.8	cassava4.1_000255m	Putative_R-Genes,_predicted_from_Pythozome	Vitis aestivalis	N			pleiotropic drug resistance 12 (best arabidopsis hit)
Ghir_A10G007580	PRGDB00215055	47.8	46	23	1	2032	2166	785	830	1.2e-08	62	MDP0000248164	Putative_R-Genes,_predicted_from_Pythozome	Malus x domestica	NL
Ghir_A10G007830	PRGDB00202169	41.5	123	68	1	334	702	15	133	4.6e-22	105.5	Bra007015	Putative_R-Genes,_predicted_from_Pythozome	Brassica rapa	RLP
Ghir_A10G008930	PRGDB00073072	41.5	53	27	3	663	815	562	612	33	30.4	Os.80143	Putative_R-Genes,_predicted_from_NCBI_UniGene	Oryza sativa Japonica Group	CNL	32975074	AK065056	Oryza sativa Japonica Group cDNA clone:J013001J06, full insert sequence
Ghir_A10G009270	PRGDB00189838	52.2	69	31	1	962	1168	1521	1587	3e-14	80.1	Hv.34616	Putative_R-Genes,_predicted_from_NCBI_UniGene	Hordeum vulgare	NL	326530114	AK377143	Hordeum vulgare subsp. vulgare mRNA for predicted protein, partial cds, clone: NIASHv3149K09
Ghir_A10G009390	PRGDB00202436	36.3	691	392	10	837	2903	1252	1896	8.5e-110	398.3	Bra010551	Putative_R-Genes,_predicted_from_Pythozome	Brassica rapa	CNL
Ghir_A10G009500	PRGDB00147216	81.6	364	67	0	734	1825	712	1075	7.3e-179	627.1	Bradi4g24910.1	Putative_R-Genes,_predicted_from_Pythozome	Ricinus communis	RLP			mitogen-activated protein kinase 1 (best arabidopsis hit); CGMC_MAPKCMGC_2_SLT2y_ERK.2 - CGMC includes CDA, MAPK, GSK3, and CLKC kinases, expressed (best rice hit)
Ghir_A10G010000	PRGDB00148980	63.2	601	201	11	529	2283	31	627	8.3e-207	720.3	evm.model.supercontig_108.37	Putative_R-Genes,_predicted_from_Pythozome	Arabidopsis lyrata subsp. lyrata	RLK-GNK2			cysteine-rich RLK (RECEPTOR-like protein kinase) 42 (best arabidopsis hit)
Ghir_A10G010150	PRGDB00202169	39.6	245	106	3	163	789	12	250	5.2e-43	174.9	Bra007015	Putative_R-Genes,_predicted_from_Pythozome	Brassica rapa	RLP
Ghir_A10G010170	PRGDB00191790	61.3	191	74	0	253	825	289	479	2.7e-77	289.3	Lsa.51071	Putative_R-Genes,_predicted_from_NCBI_UniGene	Lactuca sativa	N	329678974	JI581480	TSA: Lactuca sativa Letassy_X1_20535 mRNA sequence
Ghir_A10G010280	PRGDB00178622	74.5	1371	332	3	133	4236	1	1357	0	1993.4	POPTR_0008s20040.1	Putative_R-Genes,_predicted_from_Pythozome	Populus trichocarpa	N			Protein kinase family protein with ARM repeat domain (best arabidopsis hit)
Ghir_A10G010470	PRGDB00216326	31.6	114	73	2	853	1194	778	886	6.8e-07	55.8	MDP0000255780	Putative_R-Genes,_predicted_from_Pythozome	Malus x domestica	RLP
Ghir_A10G011210	PRGDB00211657	68.9	45	14	0	378	512	670	714	1.7e-12	73.6	Eucgr.H02157.1	Putative_R-Genes,_predicted_from_Pythozome	Eucalyptus grandis	TNL
Ghir_A10G011690.1	PRGDB00193121	31.1	103	71	0	491	183	919	1021	2.7e-06	54.7	Ta.71864	Putative_R-Genes,_predicted_from_NCBI_UniGene	Triticum aestivum	CNL	312469343	HP616612	TSA: Triticum aestivum cultivar Bobwhite isotig07427.flagleaf mRNA sequence
Ghir_A10G012830	PRGDB00186167	68.8	96	30	0	938	1225	101	196	1.2e-30	135.6	AC152495.1_FGT003	Putative_R-Genes,_predicted_from_Pythozome	Zea mays	CNL			LRR and NB-ARC domains-containing disease resistance protein (best arabidopsis hit); rp1, putative, expressed (best rice hit)
Ghir_A10G012830.2	PRGDB00186167	68.8	96	30	0	938	1225	101	196	1.4e-30	135.6	AC152495.1_FGT003	Putative_R-Genes,_predicted_from_Pythozome	Zea mays	CNL			LRR and NB-ARC domains-containing disease resistance protein (best arabidopsis hit); rp1, putative, expressed (best rice hit)
Ghir_A10G012960	PRGDB00214085	64.4	90	32	0	163	432	249	338	1.7e-28	127.5	MDP0000194411	Putative_R-Genes,_predicted_from_Pythozome	Malus x domestica	N
Ghir_A10G013080.1	PRGDB00206841	52.2	67	29	1	1	192	248	314	9.2e-12	72	LOC_Os04g53040.1	Putative_R-Genes,_predicted_from_Pythozome	Oryza sativa	NL
Ghir_A10G013130	PRGDB00149385	65	915	302	9	285	2990	19	928	0	1158.3	evm.model.supercontig_157.31	Putative_R-Genes,_predicted_from_Pythozome	Arabidopsis lyrata subsp. lyrata	RLP			Leucine-rich repeat protein kinase family protein (best arabidopsis hit)
Ghir_A10G013130.1	PRGDB00149385	65	915	302	9	180	2885	19	928	0	1158.3	evm.model.supercontig_157.31	Putative_R-Genes,_predicted_from_Pythozome	Arabidopsis lyrata subsp. lyrata	RLP			Leucine-rich repeat protein kinase family protein (best arabidopsis hit)
Ghir_A10G013980	PRGDB00217736	25	148	89	3	343	786	266	391	4.8e-05	48.9	Thhalv10027748m	Putative_R-Genes,_predicted_from_Pythozome	Eutrema halophilum	TNL
Ghir_A10G014330	PRGDB00213363	54.5	884	332	14	220	2739	849	1706	1.5e-249	862.4	MDP0000265619	Putative_R-Genes,_predicted_from_Pythozome	Malus x domestica	N
Ghir_A10G014480	PRGDB00164360	38.3	334	171	6	4779	3832	769	1085	1.9e-47	191.8	cassava4.1_000426m	Putative_R-Genes,_predicted_from_Pythozome	Vitis aestivalis	NL			NB-ARC domain-containing disease resistance protein (best arabidopsis hit)
Ghir_A10G014590	PRGDB00216122	29.1	412	225	17	139	1242	9	397	5.8e-31	135.6	MDP0000283975	Putative_R-Genes,_predicted_from_Pythozome	Malus x domestica	RLK
Ghir_A10G014600	PRGDB00202493	63.6	140	45	2	74	490	808	942	1.2e-42	173.3	Bra030622	Putative_R-Genes,_predicted_from_Pythozome	Brassica rapa	RLP
Ghir_A10G014600.1	PRGDB00202493	63.6	140	45	2	564	980	808	942	2.5e-42	173.3	Bra030622	Putative_R-Genes,_predicted_from_Pythozome	Brassica rapa	RLP
Ghir_A10G014670	PRGDB00146307	56	350	135	3	366	1358	1034	1383	1.2e-108	393.7	Bradi1g72570.1	Putative_R-Genes,_predicted_from_Pythozome	Ricinus communis	RLP			Leucine-rich receptor-like protein kinase family protein (best arabidopsis hit); systemin receptor SR160 precursor, putative, expressed (best rice hit)
Ghir_A10G014730.1	PRGDB00183046	23.4	303	209	7	618	1475	626	922	1.5e-14	81.3	GSVIVT01008201001	Putative_R-Genes,_predicted_from_Pythozome	Vitis vinifera	NL			calcium sensing receptor (best arabidopsis hit)
Ghir_A10G014850	PRGDB00205338	41.5	465	246	9	1666	3018	955	1407	1.4e-85	318.2	Lus10015091	Putative_R-Genes,_predicted_from_Pythozome	Linum usitatissimum	RLK-GNK2
Ghir_A10G015160	PRGDB00201108	26.9	413	239	15	979	2136	984	1360	3.5e-25	116.7	Bra002153	Putative_R-Genes,_predicted_from_Pythozome	Brassica rapa	TNL
Ghir_A10G015280	PRGDB00078682	38.7	111	66	2	728	1057	771	880	2.3e-14	80.1	Vvi.8276	Putative_R-Genes,_predicted_from_NCBI_UniGene	Vitis vinifera	NL	225452519	XM_002275052	PREDICTED: Vitis vinifera hypothetical protein LOC100250803 (LOC100250803), mRNA
Ghir_A10G015300	PRGDB00189344	36	114	65	4	1259	1585	1147	1257	8.3e-09	62.8	Hv.10056	Putative_R-Genes,_predicted_from_NCBI_UniGene	Hordeum vulgare	NL	326521753	AK369251	Hordeum vulgare subsp. vulgare mRNA for predicted protein, complete cds, clone: NIASHv2087M16
Ghir_A10G015340	PRGDB00153008	72.7	944	257	1	586	3414	20	963	0	1363.6	orange1.1g002094m	Putative_R-Genes,_predicted_from_Pythozome	Citrus sinensis	RLP			Leucine-rich receptor-like protein kinase family protein (best arabidopsis hit)
Ghir_A10G015480.1	PRGDB00213184	84.2	133	21	0	837	1235	1	133	3.8e-58	226.1	MDP0000285888	Putative_R-Genes,_predicted_from_Pythozome	Malus x domestica	CNL
Ghir_A10G015710	PRGDB00155469	82.7	156	19	2	152	604	1454	1606	2.6e-71	268.5	orange1.1g000354m	Putative_R-Genes,_predicted_from_Pythozome	Citrus sinensis	CNL			NB-ARC domain-containing disease resistance protein (best arabidopsis hit)
[truncated: 2,936 more rows]
