# Supplementary material for: Transcriptome Analysis Reveals the Defense Mechanism of Cotton against Verticillium dahliae Induced by Hypovirulent Fungus Gibellulopsis nigrescens CEF08111
Source: Int J Mol Sci. 2023 Jan 12;24(2):1480. doi: 10.3390/ijms24021480 (PMC9863408; doi:10.3390/ijms24021480)
Supplement: Supplementary file 1 [file ijms-24-01480-s001.zip › Table S5.xlsx]

## Sheet: Venn GeneI
Gene ID	log2(Vd3/SW3)	Qvalue(SW3-vs-Vd3)	log2(Gn3/SW3)	Qvalue(SW3-vs-Gn3)
BGI_novel_G000065	-1.199	0.999927	-2.93945	0.00556856
BGI_novel_G000410	1.37629	0.999927	3.34471	0.000400556
BGI_novel_G000526			3.56319	7.75867e-05
BGI_novel_G000620	-0.333957	0.999927	-3.5097	0.000131411
BGI_novel_G000979	0.470841	0.999927	6.43405	2.16269e-24
BGI_novel_G001082	1.63502	0.642849	3.40767	0.000341719
BGI_novel_G001102	-0.462942	0.999927	-3.25228	0.000920388
BGI_novel_G001650	0.767331	0.999927	2.88547	0.00716583
BGI_novel_G002406	-0.352234	0.999927	-4.02434	1.18502e-06
BGI_novel_G002669			4.27284	1.01922e-07
BGI_novel_G004084	1.30757	0.999927	2.8546	0.00773636
BGI_novel_G004158	-0.326334	0.999927	-4.07149	8.79593e-07
BGI_novel_G004226	-0.214965	0.999927	-3.56057	0.000107777
BGI_novel_G004257	1.49123	0.991295	3.88603	1.25983e-06
BGI_novel_G004943	2.30431	0.0357235	2.45418	0.00769883
BGI_novel_G004987	1.73878	0.413117	3.49888	2.44543e-05
Ghir_A01G001090.1	0.891576	0.999927	2.65051	0.0057818
Ghir_A01G002250	0.553092	0.999927	2.87043	0.00691759
Ghir_A01G004480	-1.44429	0.901316	-2.50784	0.00286606
Ghir_A01G005600	1.48437	0.999927	4.10008	6.3034e-12
Ghir_A01G013670	1.00706	0.999927	2.83539	0.00588358
Ghir_A01G015970	0.619963	0.999927	2.48489	0.00585814
Ghir_A01G018310	0.631966	0.999927	3.48084	2.20198e-12
Ghir_A01G020160	1.59645	0.29346	2.4107	0.000162068
Ghir_A01G021400	-0.475754	0.999927	2.40224	0.00588358
Ghir_A01G021450.1	-0.0906181	0.999927	3.66563	1.10279e-05
Ghir_A01G022680.1	-1.04079	0.999927	-4.50579	3.44003e-09
Ghir_A02G004000	1.23248	0.999927	2.66144	0.00144436
Ghir_A02G004660	1.61251	0.479703	2.19588	0.0015917
Ghir_A02G007170	0.543901	0.999927	5.12157	5.32595e-13
Ghir_A02G012310.3	-0.470627	0.999927	-2.90814	0.00631133
Ghir_A02G016000	0.847194	0.999927	2.15326	0.0071312
Ghir_A03G000980	0.460351	0.999927	2.37815	0.000676183
Ghir_A03G001030	2.00157	0.198563	3.09812	0.000990651
Ghir_A03G006390	1.21735	0.999927	3.13843	0.000443321
Ghir_A03G011040.2	-0.742544	0.999927	-4.18244	1.94653e-07
Ghir_A03G011140	0.0984911	0.999927	2.52495	7.86194e-10
Ghir_A03G011310	1.18432	0.999927	3.46186	0.00019492
Ghir_A03G017330			3.38699	0.000322878
Ghir_A03G017570	1.16524	0.999927	3.25842	1.61051e-05
Ghir_A03G023780	1.06981	0.999927	4.57805	1.99897e-09
Ghir_A04G000840	0.998121	0.999927	3.12297	0.000341719
Ghir_A04G001780	0.676641	0.999927	2.68031	0.000111284
Ghir_A04G010830	0.504841	0.999927	2.41696	1.88325e-06
Ghir_A04G011140	0.18503	0.999927	2.94589	0.0053246
Ghir_A04G012440	1.11763	0.999927	3.95596	6.96156e-08
Ghir_A04G012450	1.22109	0.999927	3.24224	1.86334e-05
Ghir_A04G013310	1.1718	0.999927	4.29828	5.92763e-10
Ghir_A04G013320	0.184684	0.999927	2.48589	0.00121031
Ghir_A04G013330	0.171096	0.999927	3.89859	2.19825e-06
Ghir_A05G002310	0.278453	0.999927	2.95508	0.00497308
Ghir_A05G003910	0.503842	0.999927	2.27437	0.000454448
Ghir_A05G006370	1.17786	0.999927	3.11093	3.23548e-07
Ghir_A05G009150	0.672768	0.999927	3.01884	0.00123599
Ghir_A05G010780	0.0433405	0.999927	3.41937	5.79881e-10
Ghir_A05G011990	0.447974	0.999927	2.79314	0.00772546
Ghir_A05G015250	1.61749	0.753088	3.30693	2.39066e-05
Ghir_A05G019040.1	1.34159	0.999927	7.613	1.17124e-62
Ghir_A05G020740	0.427556	0.999927	2.81826	0.00327721
Ghir_A05G022770.1	0.433173	0.999927	2.20524	0.00213757
Ghir_A05G023100	0.5945	0.999927	2.82956	0.00271186
Ghir_A05G023900	0.661562	0.999927	3.51622	4.83487e-05
Ghir_A05G025800			3.50499	0.000162068
Ghir_A05G029000	0.462592	0.999927	3.20371	0.00112445
Ghir_A05G032050	-0.104793	0.999927	3.108	0.00048284
Ghir_A05G036670	0.752413	0.999927	3.37558	7.71184e-05
Ghir_A05G037030	-0.0972261	0.999927	2.76242	0.0071312
Ghir_A05G038920	0.904921	0.999927	2.76239	0.000366771
Ghir_A05G040420	2.20565	0.0747559	3.66583	6.58066e-10
Ghir_A05G043510	0.511373	0.999927	2.5101	0.00424662
Ghir_A06G000150	-0.236343	0.999927	2.69854	0.00437733
Ghir_A06G000170	0.223696	0.999927	2.70166	0.000343999
Ghir_A06G005390	0.622097	0.999927	4.62511	3.12232e-09
Ghir_A06G012470.1	-0.405522	0.999927	-4.05648	7.65219e-07
Ghir_A06G012790	1.22812	0.999927	3.67156	1.58293e-06
Ghir_A06G013700	-0.401521	0.999927	2.45367	0.000878011
Ghir_A06G015610	-0.19172	0.999927	3.2392	0.000486288
Ghir_A06G016420	0.335811	0.999927	3.94831	2.52384e-11
Ghir_A07G003330	-0.626747	0.999927	-5.49564	1.25481e-15
Ghir_A07G011380	0.658476	0.999927	2.84873	0.00862722
Ghir_A07G022140	-0.974312	0.999927	2.37822	0.00462559
Ghir_A08G002820	1.47661	0.185445	3.65758	1.70879e-09
Ghir_A08G002860	0.616941	0.999927	2.68967	9.5353e-07
Ghir_A08G005730	0.59225	0.999927	3.61899	5.52334e-06
Ghir_A08G009860	0.695643	0.999927	2.57829	0.000141251
Ghir_A08G009870	0.8109	0.999927	2.43964	2.6126e-06
Ghir_A08G011580			2.93286	0.00561296
Ghir_A08G012550	1.15075	0.999927	2.23582	0.000705261
Ghir_A08G017220	1.4137	0.999927	3.38263	0.000166076
Ghir_A08G018060	0.530373	0.999927	2.4667	0.00476173
Ghir_A08G024790	0.960973	0.999927	2.58504	0.00169553
Ghir_A09G002070	0.371302	0.999927	2.63896	0.00217286
Ghir_A09G016970	0.696818	0.999927	3.49576	0.000112065
Ghir_A09G021140	0.0450766	0.999927	2.9954	0.00289893
Ghir_A10G003430	0.73708	0.999927	2.5409	6.30961e-05
Ghir_A10G003440	0.992028	0.999927	2.34507	3.20718e-05
Ghir_A10G005750	0.0570061	0.999927	2.70052	0.00887116
Ghir_A10G006760	1.12529	0.999927	3.00313	0.00138877
Ghir_A10G009150	0.671649	0.999927	2.8833	0.00323073
Ghir_A10G011270	0.513295	0.999927	3.13764	0.000124148
Ghir_A10G015270	0.395756	0.999927	2.6655	0.00153583
Ghir_A10G015710	0.00969862	0.999927	2.87339	0.00497964
Ghir_A10G021880	1.907	0.254002	4.33192	7.86194e-10
Ghir_A10G023650	1.88551	0.175669	2.30502	8.04166e-11
Ghir_A10G024200	1.20018	0.999927	2.79921	0.00595452
Ghir_A11G002250	0.157299	0.999927	3.0992	0.00221049
Ghir_A11G007160.1	0.438809	0.999927	-3.22245	0.000963776
Ghir_A11G008000	1.55445	0.882845	2.94055	0.00372286
Ghir_A11G010740	1.46157	0.999927	2.49403	0.000159079
Ghir_A11G013240	0.888639	0.999927	3.84447	9.3707e-08
Ghir_A11G019440.1	1.34759	0.999927	4.68912	3.2144e-10
Ghir_A11G026830	0.347574	0.999927	2.38921	0.00118311
Ghir_A11G029610	0.123102	0.999927	2.82058	0.000238996
Ghir_A11G035400	1.28068	0.999927	5.29434	1.13113e-16
Ghir_A12G000410	0.704816	0.999927	3.6323	2.69209e-06
Ghir_A12G001630	0.757365	0.999927	3.10649	0.00169553
Ghir_A12G001640	1.18775	0.999927	3.78332	2.06234e-07
Ghir_A12G001910	1.38475	0.999927	2.93801	0.000499765
Ghir_A12G016160	0.236019	0.999927	3.13433	5.60354e-08
Ghir_A12G019960	-0.438332	0.999927	2.72002	0.000200901
Ghir_A12G022570	0.808107	0.999927	3.44128	9.37595e-08
Ghir_A12G027520.1	0.106285	0.999927	-3.40257	0.000277467
Ghir_A13G005050	0.827048	0.999927	2.77958	0.00316628
Ghir_A13G006950	1.24331	0.999927	3.30203	0.000340196
Ghir_A13G006960	0.827433	0.999927	3.25606	0.000545013
Ghir_A13G007070	1.24974	0.999927	3.46377	0.000146198
Ghir_A13G016950	0.863928	0.999927	2.40587	7.12779e-06
Ghir_A13G016950.1	0.360764	0.999927	2.05826	0.00143732
Ghir_D01G014410	0.564545	0.999927	2.5251	0.000400556
Ghir_D01G016360			3.55208	0.000112238
Ghir_D01G018560	1.41927	0.298448	2.32802	0.000471051
Ghir_D02G001650	1.56105	0.616947	2.30812	0.00430128
Ghir_D02G002880	1.3498	0.999927	2.99488	0.00342022
Ghir_D02G004980	1.31424	0.999927	2.05534	0.000494055
Ghir_D02G015160	0.376891	0.999927	3.50569	5.39912e-07
Ghir_D02G015910	0.883324	0.999927	2.89762	0.00153583
Ghir_D02G018040			5.59629	5.12194e-15
Ghir_D03G002100	2.30615	0.019957	2.36105	7.88365e-08
Ghir_D03G003820	0.820918	0.999927	4.57812	3.2144e-10
Ghir_D03G015010	0.405378	0.999927	3.14518	1.57659e-06
Ghir_D03G015280	1.33015	0.999927	2.9076	0.00250878
Ghir_D03G015740	0.935655	0.999927	2.88646	0.00422305
Ghir_D03G017150.1	-0.195129	0.999927	-3.06332	0.00112445
Ghir_D03G017740	-0.21786	0.999927	2.26749	2.61258e-07
Ghir_D04G009070	0.780843	0.999927	3.46707	0.00019492
Ghir_D04G010910.3	0.332285	0.999927	3.24395	0.000794586
Ghir_D04G015080	0.79543	0.999927	4.50878	7.60004e-12
Ghir_D04G015610	0.790206	0.999927	2.07439	0.00148917
Ghir_D04G016860	1.49192	0.999927	4.07412	1.5379e-08
Ghir_D04G016870	1.0395	0.999927	3.65315	1.9769e-06
Ghir_D04G016880	1.06045	0.999927	3.16107	0.000341719
Ghir_D05G001040	0.740921	0.999927	3.35261	0.000146035
Ghir_D05G002470.1	0.586303	0.999927	3.40708	5.10273e-05
Ghir_D05G015010	0.77637	0.999927	3.97591	7.1584e-13
Ghir_D05G015090	1.24378	0.999927	3.60188	1.36428e-05
Ghir_D05G015770			3.27193	0.000748224
Ghir_D05G019060	1.72712	0.277056	5.11038	2.18356e-61
Ghir_D05G022880	1.09458	0.999927	3.06765	4.81781e-07
Ghir_D05G024090	1.63799	0.666317	2.81615	0.00198149
Ghir_D05G024360	0.688608	0.999927	2.49281	0.000396401
Ghir_D05G025820	0.0505938	0.999927	3.25091	0.000863483
Ghir_D05G036310.1	1.67163	0.594323	2.91633	0.00176552
Ghir_D05G038590	0.588614	0.999927	2.70751	0.00899491
Ghir_D06G000190	0.847349	0.999927	2.52742	3.84051e-06
Ghir_D06G005400	1.46164	0.999927	4.263	1.73242e-10
Ghir_D06G013380	0.978971	0.999927	3.12263	0.000497415
Ghir_D06G013860	0.216624	0.999927	3.20428	1.4547e-07
Ghir_D06G013880	0.999206	0.999927	2.67577	3.01895e-07
Ghir_D06G014300	-0.224869	0.999927	2.10356	0.00200678
Ghir_D06G015650	0.270629	0.999927	2.88386	9.89566e-06
Ghir_D06G018210	0.918301	0.999927	3.1475	0.00175174
Ghir_D06G020890	0.870162	0.999927	2.86001	0.000307832
Ghir_D07G000800.2	0.369505	0.999927	3.24315	0.000853344
Ghir_D07G005730	-0.024493	0.999927	2.05347	0.000556516
Ghir_D07G010800	0.249759	0.999927	2.93589	1.27478e-07
Ghir_D07G011090	0.867586	0.999927	3.25897	0.000177074
Ghir_D07G011260	1.76302	0.473103	3.03482	9.76436e-11
Ghir_D07G020490	0.158372	0.999927	2.6057	0.000255871
Ghir_D07G022230.1	-0.0961058	0.999927	2.87702	0.00610305
Ghir_D07G023030	0.242851	0.999927	3.57526	2.43122e-05
Ghir_D07G023420	0.392889	0.999927	2.94803	0.00036752
Ghir_D07G023700	0.922002	0.999927	2.33207	4.83487e-05
Ghir_D08G002010	1.36258	0.999927	2.89589	0.00395907
Ghir_D08G002940	1.12836	0.999927	3.24153	7.2471e-08
Ghir_D08G005870	0.475941	0.999927	2.74253	0.00728557
Ghir_D08G005990	-0.194109	0.999927	2.72201	0.00588358
Ghir_D08G007460	1.56648	0.743078	3.98488	9.06055e-12
Ghir_D08G009520	1.02115	0.999927	2.73593	3.09351e-06
Ghir_D08G009530	1.14277	0.999927	2.44171	0.00170676
Ghir_D08G009780	-0.601197	0.999927	2.56586	0.000897586
Ghir_D08G011800	0.476557	0.999927	2.64654	1.56416e-07
Ghir_D08G013910	0.769881	0.999927	2.19166	0.00447577
Ghir_D08G018040	2.26796	0.0578249	4.17668	5.11855e-08
Ghir_D08G018930	0.874901	0.999927	2.53371	0.0022233
Ghir_D08G022030	0.188725	0.999927	2.53665	0.00561609
Ghir_D08G022170	0.715269	0.999927	2.49716	0.00398014
Ghir_D08G024290	2.00177	0.192538	3.58925	0.000112065
Ghir_D08G025680.1	1.11475	0.999927	3.04537	1.63212e-06
Ghir_D09G002020	-0.00398529	0.999927	2.92864	0.000430626
Ghir_D09G008850	0.307355	0.999927	2.29829	0.00200796
Ghir_D09G011510	-0.346572	0.999927	-3.5907	6.33734e-05
Ghir_D09G015430	1.07385	0.999927	2.57942	0.00198149
Ghir_D09G016440	0.298811	0.999927	3.95049	5.11855e-08
Ghir_D09G019100.1	0.553625	0.999927	4.8909	1.86786e-11
Ghir_D09G022410	1.09852	0.999927	2.88563	0.00726488
Ghir_D09G023550	-0.0100033	0.999927	2.7764	0.00607177
Ghir_D10G008610	0.432662	0.999927	2.85473	0.00298783
Ghir_D10G010100	0.776513	0.999927	3.13035	0.00119577
Ghir_D10G012300	0.943884	0.999927	3.28195	3.84375e-07
Ghir_D10G012300.1	0.281116	0.999927	2.93018	0.000910263
Ghir_D10G013060	2.50632	0.0115956	2.99934	0.00112445
Ghir_D10G014970	-0.321653	0.999927	2.10788	0.00122617
Ghir_D10G016490	1.05154	0.286283	3.26608	2.53382e-06
Ghir_D10G019220	0.0958846	0.999927	7.3575	9.17587e-34
Ghir_D10G022050	0.550618	0.999927	2.50652	0.00218054
Ghir_D10G022060	0.0710711	0.999927	2.56514	6.90423e-05
Ghir_D10G026110	2.21637	0.0700168	4.12093	5.73816e-27
Ghir_D11G000260	-0.509469	0.999927	2.46456	0.00909153
Ghir_D11G000640			3.87241	4.36596e-06
Ghir_D11G004880	0.586278	0.999927	2.94213	0.00122341
Ghir_D11G013210	1.15143	0.999927	4.16024	1.10401e-07
Ghir_D11G013490.1	2.39795	0.0305262	2.94706	0.00497308
Ghir_D11G015550	0.917927	0.999927	4.33334	2.99892e-08
Ghir_D11G016280	0.486067	0.999927	2.47833	0.00176552
Ghir_D11G016420	-0.0226825	0.999927	2.29181	0.000166076
Ghir_D11G016950	0.0509805	0.999927	5.12272	3.24057e-18
Ghir_D11G036020	1.10891	0.999927	3.57804	1.63212e-06
Ghir_D12G000370	0.543925	0.999927	2.76824	0.00444508
Ghir_D12G000390	1.19407	0.999927	3.82832	2.84545e-07
Ghir_D12G001050	1.53907	0.827649	2.3225	0.00561512
Ghir_D12G001660	1.04291	0.999927	3.14922	0.000366503
Ghir_D12G005430	-0.529952	0.999927	2.46042	0.00863034
Ghir_D12G016390	-0.0065445	0.999927	2.4586	2.96019e-05
Ghir_D12G016390.1	-0.104415	0.999927	2.09251	0.00288194
Ghir_D12G020210	-0.55692	0.999927	3.01299	2.19825e-06
Ghir_D12G020350	0.703026	0.999927	3.10889	0.000113068
Ghir_D12G021740	0.975377	0.999927	5.12603	1.28644e-12
Ghir_D12G022390.1	1.09841	0.999927	3.3177	0.000264165
Ghir_D12G023200	0.156585	0.999927	3.07571	0.000798974
Ghir_D13G005140	0.998302	0.999927	3.12353	0.000556516
Ghir_D13G005180	0.754547	0.999927	2.75825	0.0093824
Ghir_D13G005260	0.785637	0.999927	3.13953	0.000384691
Ghir_D13G005310	0.691571	0.999927	3.8984	1.63212e-06
Ghir_D13G014130.1	0.498401	0.999927	3.10013	0.00217286
Ghir_D13G016830	0.144359	0.999927	2.27186	0.000497415
Ghir_D13G018340	0.572656	0.999927	4.98277	4.86884e-13
Ghir_D13G019100.2	1.08514	0.999927	2.94065	0.00518253
Ghir_D13G019110	1.20535	0.999927	2.09986	0.00354978
Ghir_D13G021210.1	0.743128	0.999927	2.91476	0.00444508
