# Supplementary material for: Transcriptome Analysis Reveals the Defense Mechanism of Cotton against Verticillium dahliae Induced by Hypovirulent Fungus Gibellulopsis nigrescens CEF08111
Source: Int J Mol Sci. 2023 Jan 12;24(2):1480. doi: 10.3390/ijms24021480 (PMC9863408; doi:10.3390/ijms24021480)
Supplement: Supplementary file 1 [file ijms-24-01480-s001.zip › Table S6.xlsx]

## Sheet: Venn GeneI
Gene ID	log2(Vd12/SW12)	Qvalue(SW12-vs-Vd12)	log2(Gn12/SW12)	Qvalue(SW12-vs-Gn12)
BGI_novel_G000021	-1.23658	0.558565	-2.61481	0.0027502
BGI_novel_G000024	1.25562	0.580389	2.81076	0.00736055
BGI_novel_G000030	-2.49416	0.0252093	-4.63808	3.5341e-15
BGI_novel_G000031	-1.98981	0.147446	-3.32386	0.00119414
BGI_novel_G000110	-0.898063	0.438553	-2.82306	0.00526756
BGI_novel_G000121	-1.2875	0.232084	-2.05777	0.00104675
BGI_novel_G000163	1.08418	0.449006	2.15435	0.00194904
BGI_novel_G000169	-1.24498	0.289828	-2.69421	0.0053683
BGI_novel_G000217	-1.43798	0.0780426	-3.19851	3.53859e-11
BGI_novel_G000224	1.87316	1.49046e-05	2.51442	1.86521e-16
BGI_novel_G000292	1.65404	0.00228143	2.81375	7.25807e-09
BGI_novel_G000302	2.26607	0.031011	3.07262	3.87841e-05
BGI_novel_G000320	-0.648643	0.738305	-3.14545	8.99301e-14
BGI_novel_G000323	-1.67047	0.0688601	-7.1295	7.67265e-14
BGI_novel_G000324	-0.974322	0.738715	-2.44261	2.11027e-16
BGI_novel_G000325	-1.43352	0.13378	-2.65284	1.86562e-08
BGI_novel_G000341	2.12289	0.0299293	2.55998	0.00506069
BGI_novel_G000401	1.18242	0.614584	3.83305	7.03052e-16
BGI_novel_G000420	-0.80811	0.177341	-2.14599	1.35806e-05
BGI_novel_G000426	1.28183	0.517906	3.56834	0.00917675
BGI_novel_G000477	1.51239	0.363901	2.51741	0.00955202
BGI_novel_G000535	-1.67251	1.60544e-05	-2.26804	3.63247e-06
BGI_novel_G000536	1.32909	0.151952	2.04354	4.24644e-05
BGI_novel_G000581	-0.650711	0.429968	-2.27845	7.49855e-09
BGI_novel_G000582	-1.23012	0.234545	-4.01202	1.06401e-06
BGI_novel_G000588	-1.20712	0.293762	-2.36675	1.37229e-06
BGI_novel_G000600	1.46462	0.177414	2.00241	0.0024549
BGI_novel_G000653	1.6579	0.334274	4.90414	1.82699e-05
BGI_novel_G000675	-0.58096	0.888614	-3.68297	0.00616666
BGI_novel_G000733	-0.690915	0.856704	-4.31767	0.00088941
BGI_novel_G000814	1.89192	0.239463	3.32589	0.00195739
BGI_novel_G000925	0.79382	0.811009	3.53112	0.00119414
BGI_novel_G000962	-1.09125	0.348331	-3.10272	9.39825e-08
BGI_novel_G000999	-0.907087	0.056816	-2.25177	7.12098e-05
BGI_novel_G001016	0.827216	0.732802	4.40732	0.000251238
BGI_novel_G001028	-0.0662727	0.976185	-3.27512	0.00446526
BGI_novel_G001043	0.69247	0.855423	2.4688	0.00605153
BGI_novel_G001090	-0.388033	0.944011	-4.2727	0.00060107
BGI_novel_G001115	-1.85928	0.0266662	-2.45072	1.54811e-09
BGI_novel_G001122	-0.931474	0.220002	-2.91206	4.47745e-08
BGI_novel_G001148			4.49456	0.000178843
BGI_novel_G001173	1.62323	0.103719	2.56672	0.000467279
BGI_novel_G001229	0.523785	0.845507	4.58306	9.6468e-05
BGI_novel_G001248	-1.24361	0.00213195	-2.31471	1.67247e-16
BGI_novel_G001262	1.49435	0.0180296	2.26627	6.1752e-05
BGI_novel_G001273	2.66021	0.024189	3.43381	0.00276495
BGI_novel_G001277	-1.15937	0.000226518	-2.67697	2.06776e-12
BGI_novel_G001347	0.8548	0.719995	4.104	0.00198678
BGI_novel_G001355	-1.02516	0.116453	-2.17603	2.73638e-05
BGI_novel_G001370	-1.7784	0.0583906	-2.06087	0.00140868
BGI_novel_G001396	1.68017	0.103502	2.60554	4.58638e-07
BGI_novel_G001421	-1.20445	0.000683098	-2.50078	2.83692e-07
BGI_novel_G001455	-1.593	0.202679	-3.02697	0.00752159
BGI_novel_G001588	-1.56401	0.000173714	-2.13692	3.17753e-10
BGI_novel_G001609	-1.16252	0.167517	-2.97661	0.000116711
BGI_novel_G001656	1.72015	0.100716	2.10474	6.27056e-10
BGI_novel_G001660	-1.6584	0.063855	-4.52026	9.19332e-08
BGI_novel_G001692	2.14897	0.0721475	2.74099	0.00826157
BGI_novel_G001717	1.72459	0.0292173	3.00768	1.10185e-07
BGI_novel_G001891	-0.779658	0.805284	-2.30343	2.90776e-05
BGI_novel_G001893	2.40675	0.0790532	3.75747	0.00630078
BGI_novel_G001900	-1.17033	0.0692618	-3.77333	6.05106e-07
BGI_novel_G001939	-0.488437	0.774562	-2.36741	0.000242094
BGI_novel_G001940	0.830277	0.732795	2.23161	0.00153108
BGI_novel_G001948	-0.726662	0.604662	-4.06028	1.47679e-09
BGI_novel_G002011	-0.776652	0.717415	-2.65052	0.000495633
BGI_novel_G002072	1.21732	0.547464	2.79087	0.00417956
BGI_novel_G002120	1.219	0.595896	3.27979	0.00155737
BGI_novel_G002128	-1.61138	0.0016323	-3.62361	1.11993e-41
BGI_novel_G002146	-1.15835	0.0233826	-2.08922	1.34488e-09
BGI_novel_G002188	-1.72754	0.190362	-3.09156	0.000439035
BGI_novel_G002189	-1.22089	0.384798	-2.99502	3.75959e-05
BGI_novel_G002225	-1.96467	0.026607	-3.3764	6.4097e-08
BGI_novel_G002253	1.29633	0.548313	2.72512	0.00694239
BGI_novel_G002262	-0.856259	0.0415638	-2.03632	6.50348e-08
BGI_novel_G002271	1.39744	0.489074	3.6668	6.07892e-05
BGI_novel_G002352	-0.20537	0.954091	-4.31874	0.000879821
BGI_novel_G002361	-1.00413	0.0120669	-2.61668	2.37762e-14
BGI_novel_G002391	-0.981553	0.734557	-4.29135	0.000843955
BGI_novel_G002392	1.96431	0.203634	3.91992	0.00368059
BGI_novel_G002403			3.7086	0.00759008
BGI_novel_G002432	-1.29554	0.113321	-3.05142	0.000753623
BGI_novel_G002457	-1.59538	0.0768143	-2.77491	0.00068616
BGI_novel_G002459	-1.30118	0.410095	-2.06663	0.00163437
BGI_novel_G002473	1.62391	0.344626	2.6686	0.00340147
BGI_novel_G002478	2.2939	0.0235726	4.35663	9.48665e-11
BGI_novel_G002511	-1.16033	0.585664	-2.87082	0.00468521
BGI_novel_G002696	-0.941655	0.199936	-2.5107	1.24028e-12
BGI_novel_G002707	0.961221	0.367254	2.13279	7.02593e-06
BGI_novel_G002708	1.09226	0.650871	2.67971	0.0072027
BGI_novel_G002712	-1.33754	0.00167961	-3.06368	6.83715e-13
BGI_novel_G002802	1.9223	0.219365	4.72869	4.74342e-05
BGI_novel_G002940	-0.0140871	0.99256	3.61774	0.00238757
BGI_novel_G002967	-1.03716	0.102204	-2.29408	7.56707e-07
BGI_novel_G003025	1.95738	0.204694	5.28245	2.07474e-06
BGI_novel_G003080	-1.5903	0.0156996	-2.4214	8.27936e-10
BGI_novel_G003083	0.87748	0.697125	2.08128	3.46738e-05
BGI_novel_G003103	1.76049	0.230422	2.56688	0.00792564
BGI_novel_G003108	-0.949199	0.303181	-2.10171	0.000139157
BGI_novel_G003112	-1.40651	0.425732	-3.07708	0.000346477
BGI_novel_G003127	2.22041	0.0245777	3.28599	2.51269e-05
BGI_novel_G003149	-1.426	0.142083	-2.41285	4.36312e-07
BGI_novel_G003216	1.53167	0.0431148	2.91751	1.52887e-10
BGI_novel_G003236	-1.65618	1.05333e-07	-4.36081	2.13556e-09
BGI_novel_G003267	-1.52402	0.0142128	-2.51147	1.07646e-05
BGI_novel_G003362	-1.19301	0.0286675	-3.05023	0.000729029
BGI_novel_G003406	1.98387	0.00514985	2.09604	0.00655086
BGI_novel_G003462	-1.35945	0.000121619	-4.45549	1.8079e-10
BGI_novel_G003467	-0.667642	0.754666	-4.33003	1.73335e-05
BGI_novel_G003468	-1.38987	0.0396379	-2.69068	4.34761e-07
BGI_novel_G003542	1.25584	0.528324	3.8691	0.00418682
BGI_novel_G003587	0.623428	0.814157	4.4847	0.000220781
BGI_novel_G003715	1.43508	0.461787	2.47429	0.00810206
BGI_novel_G003719	-0.356688	0.944011	-2.85724	0.00622736
BGI_novel_G003722	-1.29798	0.000104733	-2.26288	1.60452e-12
BGI_novel_G003723	-1.43921	0.39704	-2.30308	0.00878128
BGI_novel_G003742	2.36858	0.0752964	4.88553	1.15562e-10
BGI_novel_G003765	-0.893771	0.249442	-2.69171	5.2776e-15
BGI_novel_G003834	-0.76643	0.457193	-3.16623	1.45911e-14
BGI_novel_G004004	0.150259	0.950748	-2.12304	0.00751549
BGI_novel_G004021	-0.889712	0.376262	-2.83078	6.14555e-05
BGI_novel_G004059	-0.812024	0.759017	-2.02534	0.00681864
BGI_novel_G004066	0.397118	0.906203	3.81903	0.00225414
BGI_novel_G004091	-0.413185	0.821587	-2.13407	2.72421e-07
BGI_novel_G004110	-1.61228	2.45161e-05	-2.65761	1.73818e-19
BGI_novel_G004248	1.01616	0.644954	4.2203	0.000655952
BGI_novel_G004257	1.22359	0.605275	4.13273	0.000137779
BGI_novel_G004258	1.56085	0.37228	3.60813	0.00204228
BGI_novel_G004341	-0.282639	0.944011	-4.45204	0.000447135
BGI_novel_G004344	2.61121	0.0452456	4.54458	8.21132e-05
BGI_novel_G004363	1.56096	0.000983826	2.42572	1.07019e-32
BGI_novel_G004367	-0.799593	0.189557	-2.66214	1.47372e-15
BGI_novel_G004518	2.0905	0.0126102	2.85889	9.78929e-06
BGI_novel_G004543	-0.598111	0.870828	-2.19899	0.00499395
BGI_novel_G004562	-1.76961	0.000349665	-2.68914	2.42937e-13
BGI_novel_G004582	2.19317	0.129972	3.69923	0.00747982
BGI_novel_G004583	-0.621896	0.837517	-2.57487	0.0043502
BGI_novel_G004591	0.658059	0.805284	5.52452	1.67795e-07
BGI_novel_G004605	-0.664543	0.602074	-2.88791	7.92615e-05
BGI_novel_G004606	-0.0835954	0.978798	-2.7493	0.00778183
BGI_novel_G004650	-0.587174	0.431654	-2.63974	4.3696e-07
BGI_novel_G004678	0.913606	0.73548	-4.11116	0.00191282
BGI_novel_G004679	-0.0424572	0.98704	-2.58024	0.000320872
BGI_novel_G004753	-1.77456	0.0137032	-3.16865	3.63369e-17
BGI_novel_G004760	-0.954516	0.00154045	-2.62163	6.17169e-32
BGI_novel_G004777	-0.612794	0.777814	-2.10138	0.00923369
BGI_novel_G004837	-0.594594	0.780261	-2.46185	0.000345062
BGI_novel_G004840	-0.747887	0.49715	-2.58168	7.97393e-07
BGI_novel_G004842	-1.83388	0.0174302	-3.71106	5.35148e-08
BGI_novel_G004843	-1.66328	0.273662	-3.08931	2.37822e-13
BGI_novel_G004849	-0.531286	0.686902	-3.14873	9.40309e-09
BGI_novel_G004850	-0.212425	0.944011	-4.58856	5.0396e-06
BGI_novel_G004868	-0.993231	0.33841	-2.11333	0.000124251
BGI_novel_G004880	2.36456	0.0693086	2.79491	0.00824418
BGI_novel_G004944	-1.54616	0.35443	-5.73846	5.78772e-08
BGI_novel_G004957	-1.02621	0.208918	-3.3814	3.25659e-08
BGI_novel_G004996	-1.06595	0.298931	-2.26229	7.95937e-07
BGI_novel_G005003	1.41953	0.00348171	2.22268	2.30406e-11
BGI_novel_G005005	-0.855425	0.767806	-2.52303	2.40097e-06
BGI_novel_G005006	-1.98049	0.00816557	-2.67319	0.000125307
BGI_novel_G005008	-1.80784	2.38289e-05	-2.25073	0.000138125
BGI_novel_G005048	-1.54491	0.189224	-2.11736	0.00838325
BGI_novel_G005126	0.58188	0.829109	4.14379	0.000943045
BGI_novel_G005164	1.05913	0.632009	4.33209	0.000507038
BGI_novel_G005182	1.88996	0.0373299	2.18141	3.8556e-06
BGI_novel_G005185	1.86111	1.9779e-05	2.74967	4.42394e-11
BGI_novel_G005212	-0.817079	0.631769	-2.18229	0.00108123
BGI_novel_G005213	-1.00557	0.450998	-3.37661	0.000239979
BGI_novel_G005238	-0.722187	0.516677	-2.6266	1.92631e-06
BGI_novel_G005292	-1.90696	0.000555475	-4.04499	3.64831e-10
BGI_novel_G005299	-0.849134	0.77675	-5.68034	1.04094e-07
BGI_novel_G005380	-1.59231	0.079986	-2.7434	9.75356e-05
BGI_novel_G005385	-2.3241	0.0205788	-3.75706	3.87609e-06
BGI_novel_G005421	0.767312	0.81717	4.33673	6.7664e-05
BGI_novel_G005482	1.62821	0.000199809	3.04047	3.08519e-17
BGI_novel_G005492	-1.71116	0.00227545	-3.02915	1.16391e-14
BGI_novel_G005603	-1.44506	0.314395	-2.45982	0.00501471
BGI_novel_G005639	-1.27426	0.141537	-3.66673	7.0345e-08
BGI_novel_G005640	-1.74728	0.000190855	-3.52517	2.61499e-24
BGI_novel_G005643	1.55784	0.0357619	2.02371	6.39133e-06
BGI_novel_G005663	0.718731	0.788825	3.94348	2.70044e-06
BGI_novel_G005668	-1.85549	0.0569422	-4.16586	2.12278e-14
BGI_novel_G005669	-1.58972	0.0143118	-3.45592	4.1489e-06
BGI_novel_G005670	-1.00937	0.0237836	-2.28552	5.13864e-13
BGI_novel_G005724	1.78007	0.00217808	2.23736	2.25919e-08
BGI_novel_G005734	-1.8371	0.0957242	-3.48913	9.89348e-09
BGI_novel_G005950	-0.37696	0.870051	-2.09477	0.00104303
BGI_novel_G006056	-1.42724	0.00186535	-2.41454	1.38202e-06
BGI_novel_G006073	-1.30049	0.00251746	-2.47347	0.000365736
BGI_novel_G006104	1.35449	0.517716	3.1329	0.00345461
BGI_novel_G006147	1.38552	0.400305	2.43314	0.00787844
BGI_novel_G006166	1.7961	0.148735	2.04582	0.00816127
BGI_novel_G006175	1.74351	0.294432	5.45559	4.36928e-07
BGI_novel_G006176	2.108	0.155131	4.00104	0.000123169
BGI_novel_G006183	1.96491	0.210626	3.81752	0.00346802
BGI_novel_G006195	-1.37607	0.0357746	-2.93966	9.55214e-19
BGI_novel_G006197	0.526389	0.845507	-3.85984	1.38681e-11
BGI_novel_G006198	-1.57213	0.0153662	-4.49562	6.51441e-13
BGI_novel_G006234	-1.44695	0.220222	-2.95473	7.60995e-06
BGI_novel_G006240	-1.8356	0.0724098	-2.47392	3.07695e-07
BGI_novel_G006245	-0.507788	0.587731	-2.67272	1.60727e-13
BGI_novel_G006248	-1.50357	0.12578	-3.11092	0.000876843
BGI_novel_G006258	-1.17497	0.128104	-2.00417	1.02179e-06
BGI_novel_G006265	1.3926	0.386746	2.53118	0.000257461
BGI_novel_G006271	-1.42989	0.0299394	-2.68828	0.00200861
BGI_novel_G006273	-0.561896	0.789726	-2.78885	0.00666034
BGI_novel_G006274	-1.17791	0.0305922	-2.04002	6.40937e-09
BGI_novel_G006276	1.48025	0.0836065	2.61936	1.50777e-07
BGI_novel_G006279	2.39986	0.076291	3.38411	0.0070301
BGI_novel_G006333	-2.31418	0.0101142	-2.61962	0.000256136
BGI_novel_G006378	1.42865	0.0790791	2.45118	1.6611e-05
BGI_novel_G006394	-1.36585	0.166215	-2.77232	2.34909e-06
BGI_novel_G006427	1.26307	0.247239	2.05301	0.0032417
BGI_novel_G006474	-1.48306	0.00145016	-3.2071	3.54088e-13
BGI_novel_G006503	-1.57206	0.344696	-3.09724	3.44153e-06
BGI_novel_G006516	-2.77866	0.0107577	-3.64081	0.000885096
BGI_novel_G006579	-1.97501	4.80184e-07	-3.06701	1.69478e-37
BGI_novel_G006590	-0.382199	0.934711	-2.85378	0.00544409
BGI_novel_G006627	-0.0609149	0.982264	-3.45196	1.59067e-10
BGI_novel_G006655	-0.629293	0.643177	-2.41298	0.000248485
BGI_novel_G006688	-1.01027	0.543333	-2.86934	0.000588533
BGI_novel_G006695	2.22415	0.12376	3.531	0.00932734
BGI_novel_G006768	1.04292	0.413583	2.17322	0.000641543
BGI_novel_G006783	-1.16431	0.274234	-2.42472	2.28241e-05
BGI_novel_G006831	1.86918	0.104027	3.15619	7.28352e-05
BGI_novel_G006846	0.0369662	0.991666	-2.76706	2.44193e-05
BGI_novel_G006860	1.68	0.218737	2.86101	0.00127172
BGI_novel_G006886	0.98389	0.708308	2.75785	0.0063124
BGI_novel_G006887	-1.05961	0.210265	-4.59423	1.12464e-06
BGI_novel_G006893	0.797701	0.743548	3.88484	0.00326302
BGI_novel_G006924	1.07904	0.534656	2.18783	0.00615962
BGI_novel_G006981	-1.96998	7.39103e-06	-2.15079	2.8144e-06
BGI_novel_G007008	-0.899176	0.149499	-2.67424	8.10152e-05
BGI_novel_G007075	-1.8817	0.00903635	-2.20892	1.71848e-07
BGI_novel_G007083	1.67988	0.275334	2.2601	0.00966314
BGI_novel_G007136	1.75268	0.298767	3.66415	0.00295886
BGI_novel_G007161	1.39412	0.488359	3.98793	0.00149243
BGI_novel_G007179	-0.82948	0.346068	-2.41637	7.67428e-07
BGI_novel_G007192	-0.77779	0.234009	-2.3891	0.000122119
BGI_novel_G007300	1.78878	0.0673076	2.50662	0.00151966
BGI_novel_G007340	1.92627	0.00855724	2.3405	4.14136e-05
BGI_novel_G007418	-2.49704	0.021831	-4.21708	4.12112e-07
BGI_novel_G007420	-3.0064	0.0101317	-3.63836	0.000943694
BGI_novel_G007436	-1.50069	0.0326155	-3.08182	2.91892e-12
BGI_novel_G007437	-0.482852	0.836485	-2.75048	0.00345722
BGI_novel_G007445	2.38208	0.0191766	2.98272	0.000413819
BGI_novel_G007452	-0.801814	0.798177	-4.58545	0.000113438
BGI_novel_G007481	1.36054	0.480058	3.751	0.00446526
BGI_novel_G007510	-2.0942	0.0250413	-5.16823	3.68428e-09
BGI_novel_G007573	1.57517	0.0388591	2.58688	1.51008e-07
BGI_novel_G007632	-0.691175	0.770407	-2.10347	0.00629217
Ghir_A01G000080.1	2.14148	0.131256	3.21583	0.000879821
Ghir_A01G000170	-1.56179	0.114404	-3.59454	9.44171e-10
Ghir_A01G000230	1.44652	0.342627	2.12034	0.00263187
Ghir_A01G000790	-0.422611	0.297764	-2.46698	1.36573e-06
Ghir_A01G000970	-1.53641	0.0269412	-2.94978	1.18699e-06
Ghir_A01G001100	1.44627	0.178878	2.59508	7.08971e-08
Ghir_A01G001670	1.23352	0.375505	2.86277	2.60053e-06
Ghir_A01G001820	-1.17051	0.538043	-3.77407	0.00428599
Ghir_A01G001890.1	-1.59304	0.383163	-3.6425	0.00890748
Ghir_A01G002020	-1.06603	0.346989	-3.51188	1.47917e-07
Ghir_A01G002060.1	-0.39683	0.875207	-2.57105	1.05373e-06
Ghir_A01G002170	0.80505	0.756978	3.48898	0.0080795
Ghir_A01G002600	0.587346	0.824213	3.66302	0.00865326
Ghir_A01G003140.2	0.373656	0.894613	5.01916	1.06055e-05
Ghir_A01G003220	-0.881403	0.315499	-2.55001	1.2636e-10
Ghir_A01G003470	-2.93435	0.0107143	-3.21332	0.0090842
Ghir_A01G003660	-1.11163	0.122165	-2.20348	0.000726654
Ghir_A01G003660.1	-1.93269	0.0709372	-3.04671	0.0021552
Ghir_A01G003770	0.425153	0.935191	3.28543	0.00316194
Ghir_A01G004080	-0.950303	1.4359e-05	-2.0965	1.05692e-06
Ghir_A01G004530	2.53463	0.0397393	4.99023	1.11764e-12
Ghir_A01G004740	-1.98733	0.0334902	-3.07076	1.66611e-09
Ghir_A01G004860	1.71848	0.147778	2.12369	0.00204718
Ghir_A01G004950	1.24838	0.471575	3.11184	9.55864e-07
Ghir_A01G005770	-1.28103	0.218589	-2.51961	0.000295468
Ghir_A01G005800	-1.47489	0.205336	-3.07754	0.000577404
Ghir_A01G006070	-1.76712	0.0121978	-2.47641	2.65802e-08
Ghir_A01G006100	-1.30611	0.398917	-2.16183	0.00048383
Ghir_A01G006200	-1.45805	0.000112001	-3.61382	8.15915e-07
Ghir_A01G006300	1.47533	0.406553	2.84057	0.00146279
Ghir_A01G006320	-0.820957	0.43795	-2.32545	0.000313793
Ghir_A01G006390	-0.578349	0.406572	-2.9934	1.88809e-05
Ghir_A01G006570	-1.1983	0.0172604	-2.25903	1.51405e-05
Ghir_A01G006590	-0.298686	0.623501	-2.47665	0.00114758
Ghir_A01G006900.1	1.52704	0.0834804	2.78912	4.3696e-07
Ghir_A01G006940	-1.05434	0.410485	-2.13274	6.03385e-05
Ghir_A01G007220	-0.932576	0.314395	-2.6633	0.00318794
Ghir_A01G007420.1	1.54398	0.346068	2.68946	0.00524584
Ghir_A01G007640	-1.71092	0.00651392	-3.14401	4.74189e-11
Ghir_A01G007760	-1.27091	0.246652	-2.84044	9.01172e-12
Ghir_A01G007920	1.65542	0.194777	3.74342	1.83141e-07
Ghir_A01G008390	1.55118	0.335574	2.9536	3.87221e-05
Ghir_A01G008680	1.4833	0.135333	2.36517	2.4272e-05
Ghir_A01G008690	1.80115	0.111251	3.05445	1.51345e-07
Ghir_A01G009210	1.23401	0.47892	2.10431	0.000477326
Ghir_A01G009570	1.59857	0.359367	3.61497	0.00877358
Ghir_A01G009680.1	1.4361	0.0733195	3.38944	5.91583e-09
Ghir_A01G009850	-1.15106	0.0200289	-3.25445	1.48422e-09
Ghir_A01G009850.1	-0.428642	0.43935	-2.12941	0.00257051
Ghir_A01G009950	1.6358	0.0713073	2.62742	1.50804e-05
Ghir_A01G010030	-0.592512	0.094179	-2.60319	4.94021e-14
Ghir_A01G010090.1	-1.08119	0.383916	-2.97897	6.20821e-07
Ghir_A01G010110	-1.75401	0.13817	-2.51073	0.00127909
Ghir_A01G010140.1	-0.573615	0.80824	-2.23703	0.0050785
Ghir_A01G010160	1.73816	0.177341	2.11099	0.00811459
Ghir_A01G010490	-0.671766	0.177847	-2.19896	6.95275e-09
Ghir_A01G010500	1.36143	0.492864	2.59017	0.00717711
Ghir_A01G010680	2.0601	0.0969713	3.55557	8.88163e-08
Ghir_A01G010940	1.12906	0.653401	3.12671	0.00830679
Ghir_A01G011630	-0.963121	0.021552	-3.27312	0.000187044
Ghir_A01G011740.1	-0.836875	0.785649	-2.38254	0.000390162
Ghir_A01G012610	2.01652	0.185764	5.28616	9.20142e-07
Ghir_A01G012620	1.41823	0.140133	3.03776	1.26815e-12
Ghir_A01G013590	2.23814	0.0705871	3.50822	0.000152513
Ghir_A01G013990	-1.58573	0.00559631	-4.00314	1.02839e-34
Ghir_A01G013990.2	-0.652285	0.541134	-3.08199	8.13277e-07
Ghir_A01G014020	1.63047	0.363247	4.02009	2.22923e-05
Ghir_A01G014030	1.60241	0.378244	4.08071	2.87897e-07
Ghir_A01G014070	-0.694324	0.598316	-2.49364	0.00212508
Ghir_A01G014070.2	-1.61509	3.54459e-05	-4.07905	2.50841e-10
Ghir_A01G014240	-0.701251	0.453735	-2.51636	2.55367e-09
Ghir_A01G014520	-0.705476	0.0350212	-2.2478	0.0003632
Ghir_A01G014680.1	1.27932	0.490635	2.99311	9.63068e-05
Ghir_A01G014720	-1.08285	0.094926	-3.28515	4.21169e-05
Ghir_A01G014740	-1.8674	0.0336172	-3.8529	5.98172e-05
Ghir_A01G014740.6	-2.08374	0.12726	-3.91773	6.41079e-05
Ghir_A01G015890	-0.709184	0.63236	-2.63717	0.00319347
Ghir_A01G016010	1.97148	1.92811e-05	2.87808	2.41221e-36
Ghir_A01G016110	-1.26213	0.00695446	-3.10678	1.32485e-12
Ghir_A01G016120	-0.503762	0.665356	-2.19671	0.00859712
Ghir_A01G016140	-1.2415	0.0694348	-2.70109	2.18815e-08
Ghir_A01G016490.1	-2.85687	0.0207108	-3.60849	0.00609472
Ghir_A01G016520	-1.69906	0.308035	-5.42368	5.3082e-13
Ghir_A01G016520.1	-0.962168	0.426549	-4.09381	1.93013e-06
Ghir_A01G016650	-1.26073	0.00818751	-3.48409	4.52693e-06
Ghir_A01G016720	-0.6357	0.582571	-2.37685	0.000470476
Ghir_A01G017190	-1.29818	0.415964	-3.45084	0.00029665
Ghir_A01G017230	-1.0984	0.094926	-3.35082	1.05819e-16
Ghir_A01G017340	-1.58284	0.002777	-5.55097	3.40371e-65
Ghir_A01G017430.1	-1.13108	0.503811	-2.55168	0.000460658
Ghir_A01G017740	-0.51709	0.639987	-2.63354	1.39908e-11
Ghir_A01G017740.2	-1.49273	0.00252087	-2.75755	4.8392e-13
Ghir_A01G018320.1	2.30533	0.0926204	3.18775	0.00873392
Ghir_A01G018380	-1.32323	0.0195081	-3.23268	5.2484e-19
Ghir_A01G018470	-0.526843	0.701019	-2.28418	6.58747e-10
Ghir_A01G018550.1	-1.34983	0.307894	-3.45229	0.000477989
Ghir_A01G018830	-1.49674	0.000522451	-2.95388	9.24656e-18
Ghir_A01G018830.1	-0.50622	0.853537	-3.00628	0.000132392
Ghir_A01G019410	-0.958375	0.38752	-2.59282	8.02344e-06
Ghir_A01G019420.1	-2.06185	0.0665737	-2.94094	0.000123495
Ghir_A01G019500	0.588616	0.823919	3.82275	0.00509105
Ghir_A01G019550.1	-1.29886	0.114198	-2.21856	6.69437e-07
Ghir_A01G019570	-0.868512	0.0438505	-2.65013	0.00147631
Ghir_A01G019630	0.867103	0.774348	3.67837	0.00182527
Ghir_A01G019790	-1.1732	0.313242	-3.37756	2.49742e-11
Ghir_A01G020020	-0.851628	0.084874	-2.58424	1.55539e-08
Ghir_A01G020240	2.02857	0.110389	2.67993	0.00273326
Ghir_A01G021390	1.05097	0.557691	2.87707	0.00258026
Ghir_A01G021750	-1.50518	0.0118187	-3.58764	1.12899e-09
Ghir_A01G021960	1.66275	0.00530065	2.36952	2.61714e-06
Ghir_A01G022030	0.50487	0.913424	2.36427	0.00231478
Ghir_A01G022230	-0.76015	0.349572	-2.81768	4.29572e-08
Ghir_A01G022410	2.0526	0.126323	2.85313	0.00143952
Ghir_A01G022450	-1.46148	0.000149187	-3.22506	2.23669e-25
Ghir_A01G022480	1.56751	0.168471	2.15995	0.00233759
Ghir_A01G022700	-1.10837	0.10508	-2.45659	2.80911e-10
Ghir_A01G022830	1.35915	0.298767	2.47314	6.89264e-06
Ghir_A01G022950	1.44952	0.0724098	2.0483	0.000507664
Ghir_A02G000400	-0.577531	0.663627	-2.01838	0.000404014
Ghir_A02G000490	1.67712	0.159903	3.20476	1.00596e-11
Ghir_A02G001220.1	-1.8705	0.000402844	-2.6937	3.60359e-12
Ghir_A02G002020	-1.63045	0.0678368	-3.03144	5.30682e-10
Ghir_A02G002070	-0.696133	0.712939	-2.20736	0.000395067
Ghir_A02G002140	1.58468	0.0657741	2.12133	0.00257013
Ghir_A02G002480.1	-0.3924	0.814157	-2.10888	3.70962e-10
Ghir_A02G002850	-1.47094	0.124208	-2.28385	1.61632e-09
Ghir_A02G002890	-1.03363	0.377906	-2.13702	1.00309e-06
Ghir_A02G003350	-1.7017	0.150293	-2.4438	0.00214632
Ghir_A02G003360	-0.831778	0.0592266	-2.17387	2.75961e-11
Ghir_A02G003360.1	-0.39733	0.870051	-2.61195	2.82286e-06
Ghir_A02G003730	-0.198111	0.944011	-4.33099	0.000465908
Ghir_A02G003800	-1.94232	0.0340049	-2.33126	0.00688528
Ghir_A02G004150	2.31159	0.0973657	3.2133	0.0093835
Ghir_A02G004380.1	-1.36334	0.0106244	-3.14578	3.38197e-21
Ghir_A02G004720	2.27672	0.109258	3.73132	0.00154416
Ghir_A02G005120	1.51178	0.158318	2.11503	0.000406409
Ghir_A02G005240	-1.62728	0.132378	-2.75129	0.00132327
Ghir_A02G005340	-0.973288	0.474406	-3.45986	6.23247e-06
Ghir_A02G005550	-1.70554	0.168675	-4.71581	1.95572e-08
Ghir_A02G005640	-1.35686	9.43626e-05	-2.68732	2.37387e-33
Ghir_A02G006680	-0.78847	0.039012	-3.04973	1.39029e-09
Ghir_A02G006830	-1.10505	0.0185179	-2.30708	1.23095e-06
Ghir_A02G006850	1.63222	0.0526735	2.24344	1.33638e-07
Ghir_A02G007010	1.71922	0.253183	2.81383	0.000845215
Ghir_A02G007100	0.120208	0.944011	-2.15537	0.000182925
Ghir_A02G007100.1	-0.849822	0.00524373	-2.28126	3.43352e-25
Ghir_A02G007160	-1.54934	0.000151696	-2.74375	1.03316e-10
Ghir_A02G007280.1	-0.728325	0.673632	-3.36273	2.33048e-05
Ghir_A02G007310	-1.02644	0.236956	-2.23172	6.66667e-07
Ghir_A02G007550	-0.509091	0.820065	-2.4444	3.83174e-05
Ghir_A02G007560	1.80114	0.00317613	2.06102	3.91759e-08
Ghir_A02G007620	-0.915182	0.0264084	-2.03031	9.65033e-19
Ghir_A02G007630	-1.44486	0.00506478	-3.36118	2.28362e-15
Ghir_A02G007870	-1.07275	0.107886	-2.74858	6.01568e-07
Ghir_A02G008100	1.8443	0.156379	2.16037	0.00787844
Ghir_A02G008140	-0.736081	0.511651	-2.37451	2.95545e-18
Ghir_A02G008140.1	-1.35064	0.0984475	-3.70007	8.23414e-13
Ghir_A02G008430	-1.69571	3.61586e-12	-2.77924	6.7238e-54
Ghir_A02G008520	-1.5396	0.00309525	-2.44422	2.01491e-19
Ghir_A02G008520.1	0.0545096	0.984179	-2.83092	8.09863e-13
Ghir_A02G008580	-1.43572	2.01713e-08	-2.73734	1.59267e-17
Ghir_A02G008620	-0.676841	0.734105	-2.03286	0.00280374
Ghir_A02G008750	1.63408	0.00343955	2.93398	6.01254e-12
Ghir_A02G008750.1	2.33718	0.0896319	4.04438	0.00025507
Ghir_A02G009240	1.95158	0.00799252	2.28566	6.93121e-06
Ghir_A02G009260	-1.46195	0.00820319	-3.49244	2.57604e-06
Ghir_A02G009630	-1.37921	1.66862e-07	-2.35878	2.7195e-10
Ghir_A02G009660	-1.93472	0.0579726	-7.82933	3.61243e-24
Ghir_A02G009770	-1.90386	0.00145506	-3.20073	6.54618e-19
Ghir_A02G010300	-1.38898	2.50429e-06	-2.97039	5.3398e-21
Ghir_A02G010420	-1.13363	0.0157482	-2.20314	9.22478e-14
Ghir_A02G010600	1.9096	0.0839417	2.76571	0.00169427
Ghir_A02G011250	-1.61179	0.0265203	-3.65269	6.42309e-07
Ghir_A02G012080.1	-1.16465	0.29847	-2.83649	8.23799e-08
Ghir_A02G012190	-0.443525	0.626598	-2.07127	8.21755e-05
Ghir_A02G012280	-1.80572	0.0175403	-5.5732	8.2355e-19
Ghir_A02G012310.3	-1.94477	8.66284e-05	-4.02304	5.52371e-19
Ghir_A02G012480	0.886373	0.705543	3.88105	0.00322108
Ghir_A02G013190	1.97682	0.144586	3.34045	0.000337042
Ghir_A02G013850	1.12038	0.567853	2.23828	0.00179654
Ghir_A02G014180	-1.34102	1.42774e-07	-3.3906	9.11698e-18
Ghir_A02G014230.1	-0.798479	0.434351	-3.62818	1.38114e-16
Ghir_A02G014280	1.34834	0.383916	2.61876	0.000168999
Ghir_A02G014390	-0.621439	0.490089	-2.83145	0.000130632
Ghir_A02G015020	-1.29765	0.000255917	-2.55717	6.82871e-13
Ghir_A02G015200	-0.437583	0.932865	-3.56739	0.00885435
Ghir_A02G015540	-0.932805	0.493191	-2.11109	0.00012571
Ghir_A02G015720	2.16182	0.0371374	2.77906	0.00203716
Ghir_A02G016290	1.50726	0.000297424	2.06675	1.8681e-20
Ghir_A02G016300	1.61887	0.000281794	2.32995	1.3626e-11
Ghir_A02G016450.1	-0.696383	0.755614	-2.20023	2.69495e-06
Ghir_A02G016730	-0.689778	0.560501	-3.34478	5.01454e-07
Ghir_A02G016760	1.76646	0.00763858	2.01191	0.000856372
Ghir_A02G016770	2.17607	0.0407794	2.93906	0.000171982
Ghir_A02G016810.1	-0.787531	0.197193	-3.16368	2.2095e-06
Ghir_A02G016820	-1.49032	0.031943	-4.04637	1.07503e-27
Ghir_A02G016830	2.02585	0.0239943	2.53831	0.000229088
Ghir_A02G017030	1.6119	0.377746	3.37174	0.00395709
Ghir_A02G017120	1.22553	0.342662	2.17112	0.00173613
Ghir_A02G017330	-0.956953	0.192934	-2.339	9.06735e-10
Ghir_A02G018380	-1.35148	0.00523935	-2.24195	2.63953e-18
Ghir_A02G018420.1	-1.46208	0.189366	-2.60531	0.000103183
Ghir_A02G018670.3	-1.01714	0.251612	-4.13385	1.30103e-13
Ghir_A02G018680	1.30817	0.121046	2.44899	2.89187e-05
Ghir_A02G018810	1.52441	0.43042	3.18958	0.0058069
Ghir_A02G018920.1	1.34453	0.0206241	2.17025	1.44985e-06
Ghir_A02G019010	-1.13279	0.131477	-2.58538	0.000345638
Ghir_A02G019190	-1.12916	0.200228	-2.174	5.40756e-05
Ghir_A02G019330	-0.782088	0.617933	-2.97285	1.15933e-13
Ghir_A02G019450	-1.40395	0.00915684	-2.55405	9.43383e-11
Ghir_A02G019450.1	-0.797561	0.410732	-2.36779	2.19056e-05
Ghir_A02G019480.1	-0.513135	0.726102	-2.03375	0.0017688
Ghir_A02G019490	-2.08131	0.105036	-4.48885	1.35954e-07
Ghir_A03G000050	-1.54913	0.0406263	-2.3428	3.15039e-07
Ghir_A03G000150.1	-0.736101	0.82291	-4.7261	7.78181e-09
Ghir_A03G000550	2.17283	0.0366771	2.36642	0.00300761
Ghir_A03G001030	0.579342	0.830744	3.56935	0.00805916
Ghir_A03G001130.1	2.48291	0.0396413	4.44275	6.36615e-07
Ghir_A03G001500	2.35053	0.0898122	4.27711	0.000108291
Ghir_A03G001560	-1.88678	0.014539	-2.49855	1.71412e-05
Ghir_A03G001690	-0.952173	0.0653865	-2.29955	1.5189e-08
Ghir_A03G001770	-1.64967	0.0807572	-5.22685	2.04253e-06
Ghir_A03G001890	2.46536	0.0646342	3.94941	0.000393672
Ghir_A03G001980	-0.877324	0.170799	-2.24023	8.24068e-07
Ghir_A03G002220	-0.95691	0.102354	-2.32159	4.97718e-06
Ghir_A03G002330	1.68732	0.220801	2.89303	0.00025916
Ghir_A03G002380.1	1.27899	0.340331	2.11088	0.00034882
Ghir_A03G002400	2.12975	0.0754307	3.06286	0.000879711
Ghir_A03G002720.1	1.35974	0.475748	3.02425	0.000170831
Ghir_A03G002770.1	1.55389	0.353529	2.58396	0.00120059
Ghir_A03G002820	-1.35053	0.281146	-3.49151	1.71986e-07
Ghir_A03G003630	2.12906	0.0235726	2.72814	1.28356e-07
Ghir_A03G004200	1.52929	0.00137004	2.25711	3.27512e-10
Ghir_A03G004200.1	1.49685	0.00795044	2.0704	7.18922e-08
Ghir_A03G004270	-1.40385	0.00392459	-3.96507	5.35414e-10
Ghir_A03G004510.1	2.13788	0.148699	4.59718	9.19121e-05
Ghir_A03G005040	2.0058	0.017603	2.78448	1.99409e-07
Ghir_A03G005130.1	1.79168	0.0898122	3.14549	6.2928e-07
Ghir_A03G005250	-1.9874	0.00159667	-3.08975	6.01162e-07
Ghir_A03G006950	1.99297	0.184138	3.2358	0.00112359
Ghir_A03G007750	1.07666	0.599633	2.31258	0.00984155
Ghir_A03G007910	-1.72912	9.74186e-07	-3.5398	6.30456e-21
Ghir_A03G008180.1	-0.679942	0.643959	-2.65883	4.11016e-05
Ghir_A03G008410	-1.07256	0.000221106	-2.53542	2.58217e-09
Ghir_A03G008760	1.06399	0.186147	2.18199	3.43518e-06
Ghir_A03G009300	-1.22141	0.0651039	-3.73011	2.60074e-07
Ghir_A03G009530	-0.998246	0.428848	-3.07524	2.79708e-06
Ghir_A03G010050.6	2.00719	0.188364	5.14296	4.1489e-06
Ghir_A03G010060	1.21396	0.60356	3.17212	0.00832377
Ghir_A03G010190.1	0.170764	0.944011	-2.12549	0.000603659
Ghir_A03G010320	-0.284358	0.836887	-3.11364	0.000132671
Ghir_A03G010910	-1.60459	0.00630964	-3.17241	1.30582e-07
Ghir_A03G010930	1.80945	0.28173	3.35126	0.00247827
Ghir_A03G011000	1.54135	0.0552244	2.00662	2.97083e-06
Ghir_A03G011200	1.50325	0.431155	4.22831	0.00019311
Ghir_A03G011220	1.12838	0.375505	2.0358	7.0127e-05
Ghir_A03G011390	-1.71051	0.27824	-3.57824	0.00870624
Ghir_A03G011530	-0.690096	0.488359	-3.81208	9.22478e-14
Ghir_A03G012000	-1.5686	9.20294e-09	-4.36067	7.0447e-57
Ghir_A03G012920	-1.23385	0.281146	-2.06415	0.00118105
Ghir_A03G013420	-1.76971	0.00503324	-3.17386	9.14342e-24
Ghir_A03G013920	-1.35721	0.166215	-4.97893	1.12738e-65
Ghir_A03G014440.2	-1.69508	0.262597	-3.38308	0.000530708
Ghir_A03G014600	-1.69525	1.28106e-08	-2.00642	5.26801e-11
Ghir_A03G014600.1	-1.79599	0.0110067	-3.60931	6.7252e-19
Ghir_A03G014650	-1.6385	0.00476246	-2.38458	0.00110467
Ghir_A03G014670	1.43898	0.458353	3.11152	0.00080008
Ghir_A03G015410	1.15404	0.643237	3.66844	0.000155749
Ghir_A03G015710	-1.53649	0.00836901	-3.30577	1.52729e-06
Ghir_A03G016030	1.94858	0.214162	3.80646	0.0042825
Ghir_A03G016080	0.0814003	0.965047	-2.06154	0.00477954
Ghir_A03G016250	1.65107	0.185349	2.14314	0.0078572
Ghir_A03G016260	-1.26336	0.00807411	-3.2849	9.38375e-22
Ghir_A03G016470	-1.38773	0.0805368	-2.59848	0.00490182
Ghir_A03G016560	-0.916843	0.00390748	-2.03184	9.54857e-06
Ghir_A03G016610	-0.453346	0.616114	-2.21291	2.20454e-05
Ghir_A03G016610.1	-0.486098	0.416945	-2.25401	0.00710439
Ghir_A03G016800.1	-1.93331	2.06053e-05	-2.6129	7.83877e-15
Ghir_A03G016830	-1.72622	8.80723e-06	-2.38908	2.78993e-17
Ghir_A03G016840.1	-0.832719	0.201279	-2.89613	1.37548e-11
Ghir_A03G017160	-0.963855	0.574119	-3.61114	3.63089e-07
Ghir_A03G017430	-1.94358	5.79798e-05	-2.89845	1.38617e-05
Ghir_A03G017480	0.0363759	0.991881	3.79318	0.000886186
Ghir_A03G017520	0.663282	0.858365	2.6313	0.00605773
Ghir_A03G017790	1.68922	0.00805061	2.29426	3.39899e-07
Ghir_A03G017870	-0.640516	0.0646738	-2.64201	3.90829e-06
Ghir_A03G017920	-0.752114	0.0514704	-2.3103	3.9172e-09
Ghir_A03G017920.1	-1.46153	0.185805	-4.84687	2.5417e-15
Ghir_A03G018190	-0.989962	0.162838	-2.60594	6.07055e-12
Ghir_A03G018320	-1.7069	0.0038929	-4.36302	3.54121e-08
Ghir_A03G018330	-0.800771	0.590249	-2.26196	0.00281433
Ghir_A03G018660	-0.379101	0.83587	-2.95879	1.0412e-09
Ghir_A03G018780	-1.64501	0.002993	-4.18595	1.27488e-64
Ghir_A03G018820	-1.51192	0.000125819	-2.66318	2.47577e-07
Ghir_A03G018850	-1.19739	0.0419975	-2.99087	5.39623e-13
Ghir_A03G019350	-0.897445	0.382799	-3.14593	1.28846e-12
Ghir_A03G019800	-1.55767	0.0229298	-2.81171	4.94795e-08
Ghir_A03G020350	1.6769	0.345992	3.08491	0.00666712
Ghir_A03G020430	-1.5315	0.312632	-4.3861	1.19074e-10
Ghir_A03G020600.1	3.01907	0.0118187	4.64601	8.49491e-05
Ghir_A03G020890	1.98377	0.204942	3.54494	0.00486462
Ghir_A03G021060	-1.76046	0.159819	-4.15868	1.751e-05
Ghir_A03G021890	0.682389	0.861209	2.9145	0.00329617
Ghir_A03G022170	2.03927	0.0184604	3.04269	2.82635e-05
Ghir_A03G022300	0.893771	0.702238	4.31817	0.000621569
Ghir_A03G022570	-1.39394	0.218173	-2.57482	0.000570498
Ghir_A03G022610	-1.3262	0.139745	-2.70122	0.000124753
Ghir_A03G022690.1	2.01795	0.0415979	3.5727	1.12225e-08
Ghir_A03G023090	-1.71909	0.000330191	-2.47457	8.22421e-05
Ghir_A03G023150	-1.19863	0.161925	-3.02394	7.9331e-07
Ghir_A03G023410	-1.18558	0.0707028	-2.30217	6.08866e-10
Ghir_A03G023410.1	-0.895275	0.0722739	-2.27468	1.80523e-11
Ghir_A03G023430	-1.91221	1.61504e-07	-2.59949	2.98332e-12
Ghir_A04G000480	2.16986	0.131501	3.78814	0.000163768
Ghir_A04G000880	-1.08483	0.330591	-2.74158	9.5192e-13
Ghir_A04G001440	1.01061	0.682475	4.86786	2.46105e-15
Ghir_A04G001930	1.49414	0.186064	2.44781	0.00142503
Ghir_A04G002500	-1.49518	0.264122	-3.01863	2.05138e-05
Ghir_A04G002670	1.13162	0.453502	2.19815	0.00393052
Ghir_A04G002790	-0.935492	0.542036	-2.35408	0.00216977
Ghir_A04G002790.1	-1.59962	0.38752	-5.32745	1.65341e-06
Ghir_A04G004530.1	-0.32255	0.944011	-2.88557	3.78918e-05
Ghir_A04G005120	1.51783	0.0438505	2.59391	1.09396e-07
Ghir_A04G005470	-0.980665	0.0379918	-3.49994	8.88163e-08
Ghir_A04G005770	1.37589	0.444186	3.15497	4.96944e-05
Ghir_A04G006040.1	-0.785468	0.227396	-3.95589	1.78626e-05
Ghir_A04G007680	-1.26914	0.197472	-2.6495	1.16757e-08
Ghir_A04G007880	1.56255	0.0651572	2.33703	0.000279424
Ghir_A04G008360	1.17948	0.590777	2.18663	0.00904635
Ghir_A04G008390	1.8946	0.0908574	2.65311	0.000314217
Ghir_A04G008650	-1.77409	1.67675e-05	-3.07961	8.57391e-17
Ghir_A04G008650.1	-1.31546	0.0187734	-3.17837	1.1156e-20
Ghir_A04G008660	-0.384826	0.89945	-2.28044	0.00586279
Ghir_A04G008940	0.899548	0.405298	2.00373	0.00013078
Ghir_A04G009030	2.12211	0.111477	5.06727	1.42791e-10
Ghir_A04G009050	2.04054	0.162796	3.45825	0.00117488
Ghir_A04G009320	-0.94833	0.19855	-3.27045	5.80914e-08
Ghir_A04G009410	-1.19588	0.584116	-2.91245	2.0683e-05
Ghir_A04G009410.1	-0.865561	0.106575	-3.02619	1.47755e-15
Ghir_A04G009540	-1.20535	0.00145945	-2.38876	4.31839e-11
Ghir_A04G009940	-0.541355	0.86481	-4.34679	5.59247e-05
Ghir_A04G009950	-0.303002	0.923582	-3.17877	0.000575804
Ghir_A04G009960	-1.34503	0.0158526	-3.80757	2.34469e-09
Ghir_A04G010160	-0.479606	0.430588	-2.3549	1.22771e-12
Ghir_A04G010380	-0.82801	0.0358003	-2.0269	6.33678e-07
Ghir_A04G010400	0.0176056	0.99256	-2.73058	0.000248453
Ghir_A04G010420	-1.66966	0.0898122	-2.1878	0.00434509
Ghir_A04G010500.1	-1.56733	0.0303154	-2.10289	7.1949e-07
Ghir_A04G010530	-0.763178	0.190362	-2.4261	4.83431e-09
Ghir_A04G011040	-1.64921	0.00524598	-4.36815	1.34893e-35
Ghir_A04G011100	-0.635714	0.412394	-3.41667	8.06146e-10
Ghir_A04G011110	-1.01238	0.0200617	-2.2871	1.0606e-07
Ghir_A04G011120	-1.29958	0.00369867	-3.66279	9.83533e-22
Ghir_A04G011160.2	-0.470997	0.689189	-2.43687	4.82763e-15
Ghir_A04G011190	1.49332	0.0257199	2.44275	3.92334e-08
Ghir_A04G011460	-1.51262	0.00780729	-3.78796	0.000111986
Ghir_A04G011680	-1.25202	0.375506	-2.45108	0.00416049
Ghir_A04G011980.1	-1.79735	0.0406932	-3.88813	8.24607e-12
Ghir_A04G012570	1.73409	0.31572	3.41932	0.00234038
Ghir_A04G012580	1.88713	0.0151251	3.56054	3.21099e-11
Ghir_A04G012780	1.30621	0.268227	2.53303	7.04195e-08
Ghir_A04G013160	1.68028	0.113731	2.00512	0.00444322
Ghir_A04G014210	-1.53494	0.00529174	-3.86146	2.58824e-21
Ghir_A04G014210.1	-1.38634	0.509314	-3.47935	1.15388e-13
Ghir_A04G014540	-1.35649	0.0409145	-2.60092	3.26343e-08
Ghir_A04G014540.7	-1.54874	0.0251107	-3.94593	9.33801e-10
Ghir_A04G015160	1.15581	0.476807	2.34452	0.00267021
Ghir_A04G015390	-1.68944	0.00263738	-4.10073	9.69543e-10
Ghir_A04G015460	-1.17008	0.0540482	-2.9031	3.88177e-11
Ghir_A04G015870.1	1.91437	0.233649	4.76426	2.25765e-08
Ghir_A04G016210	-1.21149	0.00502669	-2.32779	5.87019e-18
Ghir_A05G000230.2	-0.214431	0.944011	-2.97315	0.000412851
Ghir_A05G000360	0.910406	0.708308	3.64054	0.0076038
Ghir_A05G000460	-1.61869	0.071838	-2.57182	0.00152116
Ghir_A05G000600	1.81814	0.0190507	2.08759	0.000235781
Ghir_A05G000640	-1.70511	0.123732	-4.62124	0.000171385
Ghir_A05G001000.2	-1.12114	0.244459	-4.83337	3.58507e-09
Ghir_A05G001010.1	-1.25165	0.309298	-4.9254	8.91076e-26
Ghir_A05G001030	2.21335	0.0920471	3.05237	0.00528179
Ghir_A05G001300	1.61169	0.238711	2.57051	0.00848871
Ghir_A05G001490.1	-1.63172	0.0014799	-2.99185	2.22208e-24
Ghir_A05G001590	-1.47702	0.000276335	-2.9666	5.1315e-08
Ghir_A05G001670	1.53222	0.183692	2.18911	0.00241805
Ghir_A05G001820	-2.68697	0.0174302	-3.56634	0.000683417
Ghir_A05G001900	1.45064	0.308906	2.44263	0.000337439
Ghir_A05G002030	-1.40314	7.68238e-06	-3.63542	1.91375e-07
Ghir_A05G002200	1.71569	0.326049	3.44962	0.00260789
Ghir_A05G002250	-1.08439	0.0421644	-2.70835	5.43083e-23
Ghir_A05G002300	-0.83547	0.528831	-2.38894	0.00124069
Ghir_A05G002430	-1.41033	0.0148614	-2.14123	5.44918e-13
Ghir_A05G002570	-1.37157	0.516682	-5.56488	3.17629e-65
Ghir_A05G002570.1	-1.90586	0.17398	-5.78605	2.56377e-12
Ghir_A05G002800	1.22619	0.466284	2.14702	0.00193417
Ghir_A05G002940	-0.722241	0.332299	-2.50354	6.40001e-24
Ghir_A05G003010	1.60186	0.0119725	2.71994	6.08957e-16
Ghir_A05G003050.1	-1.96829	0.0417583	-2.33681	0.00933656
Ghir_A05G003080	1.70504	0.107949	2.72621	5.60005e-06
Ghir_A05G003170	-1.24338	0.150887	-2.83152	1.05497e-07
Ghir_A05G003220	-1.0707	0.300415	-2.86387	1.0004e-13
Ghir_A05G003290	-1.7322	0.00250302	-3.55071	9.1617e-46
Ghir_A05G003320	-1.93223	0.00125567	-2.20706	7.92375e-05
Ghir_A05G003360	-1.53369	3.50334e-05	-2.88835	3.17031e-21
Ghir_A05G003360.1	-2.16571	0.0139117	-2.41202	0.00585785
Ghir_A05G003470	-1.05728	0.054057	-3.04095	8.72823e-13
Ghir_A05G003620	-0.918767	0.250533	-2.20067	0.000429716
Ghir_A05G003660	1.98203	0.0248371	2.52722	0.00236145
Ghir_A05G003880	-1.82421	5.44649e-05	-2.98973	1.72297e-16
Ghir_A05G003980	1.88536	0.0398725	2.41954	7.29515e-05
Ghir_A05G004360	0.946164	0.678829	4.0141	0.0021438
Ghir_A05G004390	1.63753	0.291999	2.44488	0.0058702
Ghir_A05G004690	1.98024	1.3406e-05	2.98734	6.35808e-12
Ghir_A05G004690.1	1.53323	0.000643617	2.32901	8.35285e-08
Ghir_A05G004820	-1.38843	0.0187233	-2.89448	6.24351e-11
Ghir_A05G004890.1	-1.75329	0.222183	-2.71653	0.00730857
Ghir_A05G005040	1.53549	0.348243	2.69132	0.00666034
Ghir_A05G005460	0.497555	0.869058	3.30594	0.00519153
Ghir_A05G005580	-0.506724	0.885127	-2.0535	0.00896385
Ghir_A05G005890.1	-0.519505	0.670111	-2.46009	1.568e-09
Ghir_A05G005990	-0.969379	0.372317	-2.9383	5.09829e-07
Ghir_A05G006040	-0.550776	0.164984	-2.45889	6.28222e-07
Ghir_A05G006120	0.102874	0.944011	-2.36626	0.00604259
Ghir_A05G006130	-0.934134	0.500354	-2.55498	0.000631787
Ghir_A05G006250	-1.26649	0.110899	-2.30842	0.000581002
Ghir_A05G006450.1	1.39516	0.0181228	2.79487	3.735e-13
Ghir_A05G007020	2.10349	0.0679071	2.3988	0.00302046
Ghir_A05G007240.1	-1.70667	0.000813972	-2.39663	5.18943e-11
Ghir_A05G007320	-0.72744	0.67156	-2.23242	0.00613568
Ghir_A05G007470	-1.26395	0.154857	-3.49721	1.04201e-26
Ghir_A05G007950.1	-0.121382	0.966158	-3.89735	0.00400322
Ghir_A05G007960.1	-0.792074	0.267677	-2.27338	4.77098e-09
Ghir_A05G008660	1.87314	0.252852	3.51325	0.00623584
Ghir_A05G009250.1	-1.91644	0.000277646	-3.46272	2.54243e-18
Ghir_A05G009350.1	1.97191	0.100187	2.34201	0.00979801
Ghir_A05G009790	-0.474196	0.575429	-2.47464	1.29696e-12
Ghir_A05G009840.1	0.356048	0.859028	-2.26385	0.00103765
Ghir_A05G009860	-1.56449	0.00915894	-3.64833	4.89247e-10
Ghir_A05G009880	-1.63885	0.000902594	-2.73915	6.90215e-11
Ghir_A05G010020	-1.50777	2.08283e-05	-3.92878	4.06487e-20
Ghir_A05G010260.2	-0.81737	0.673707	-4.6904	2.61785e-08
Ghir_A05G010290	-1.11427	0.0707894	-3.2008	3.76143e-05
Ghir_A05G010290.1	-0.186618	0.944011	-2.35505	0.000358091
Ghir_A05G010440	-1.62736	0.232811	-3.02834	0.00536188
Ghir_A05G010440.1	-1.32944	0.0091588	-2.44824	3.30914e-18
Ghir_A05G010520.1	-1.96986	0.00252087	-3.46959	1.88127e-08
Ghir_A05G010970	1.86949	0.254637	3.46512	0.00259118
Ghir_A05G011070.1	-1.06903	0.664729	-2.71242	0.000225729
Ghir_A05G011130	1.33147	0.1032	2.2696	0.000752137
Ghir_A05G011260.1	2.9888	0.0129396	4.74837	3.75959e-05
Ghir_A05G012050.1	1.8212	0.0559301	3.17049	4.76686e-05
Ghir_A05G012180	1.93508	9.67001e-05	2.45932	1.4139e-15
Ghir_A05G012300	-1.17084	0.280179	-3.58577	1.12183e-14
Ghir_A05G012890	1.75744	0.0860973	3.60231	2.95233e-10
Ghir_A05G013230	-1.46461	0.000155335	-3.73936	1.4184e-22
Ghir_A05G013230.4	-0.825934	0.438346	-4.47493	4.32817e-07
Ghir_A05G013480.1	1.731	0.113613	2.19423	0.00461381
Ghir_A05G013650.1	2.79486	0.0251343	4.62748	9.70011e-05
Ghir_A05G014040	1.52226	0.429698	3.10131	0.00978461
Ghir_A05G014460	-1.57936	0.000377885	-3.15186	1.96861e-57
Ghir_A05G014530	-0.995553	0.578071	-2.21117	0.000218912
Ghir_A05G014610	1.28397	0.411703	2.47698	0.00523671
Ghir_A05G014650.1	0.108652	0.978947	2.39396	7.74823e-05
Ghir_A05G014890	1.69185	0.0285212	3.5774	3.75477e-14
Ghir_A05G015160	1.40292	0.0573707	2.68884	1.38422e-08
Ghir_A05G015200	-1.66539	0.182877	-3.5881	0.00541393
Ghir_A05G015200.1	-1.18736	0.43088	-4.39428	2.67694e-07
Ghir_A05G015380	-2.89672	0.016973	-3.86294	0.00308313
Ghir_A05G015440	-0.634702	0.186684	-2.89865	3.77928e-06
Ghir_A05G015500	-0.713904	0.842957	-4.04976	4.10135e-06
Ghir_A05G015690.1	-0.663301	0.278417	-2.82047	5.90492e-16
Ghir_A05G016230	0.700686	0.803173	3.52077	0.00640819
Ghir_A05G016340.7	1.65808	0.014716	2.06293	0.000160063
Ghir_A05G016490	1.63986	0.0341376	2.33354	3.5661e-05
Ghir_A05G016610	1.17828	0.302389	2.12454	0.000402481
Ghir_A05G016620	0.765593	0.780494	3.38134	0.00577547
Ghir_A05G016900	1.69105	0.242497	2.55133	0.00264701
Ghir_A05G017060.1	-1.10811	0.116078	-2.18766	2.94606e-39
Ghir_A05G017160	1.40057	5.34824e-06	2.07243	1.97498e-12
Ghir_A05G017240	1.96646	0.206144	3.50944	0.000985961
Ghir_A05G017600	-1.1502	0.460539	-5.81644	1.16676e-12
Ghir_A05G017630	-1.35046	0.011095	-3.33126	9.26418e-14
Ghir_A05G017680	-1.87907	0.0222134	-5.15709	3.8355e-14
Ghir_A05G017750	1.24115	0.0229967	2.21914	1.0602e-12
Ghir_A05G017770	-0.601391	0.604729	-2.06819	2.78761e-08
Ghir_A05G017960	-1.62942	3.4776e-08	-2.38936	1.89741e-13
Ghir_A05G017990	-0.66558	0.821818	-2.45524	0.00924919
Ghir_A05G018040.1	1.32626	0.0191044	2.06543	3.12474e-05
Ghir_A05G018230.1	-1.75919	0.219174	-2.74366	0.00797735
Ghir_A05G018520	-1.1745	0.207653	-3.11462	2.5197e-09
Ghir_A05G018590	-1.04627	0.684302	-2.08058	0.00293982
Ghir_A05G018710	-1.43549	0.0047028	-2.03293	4.9542e-06
Ghir_A05G018780	0.475214	0.913967	2.88163	0.00544409
Ghir_A05G019210	-1.68768	2.69883e-06	-2.13383	4.9911e-07
Ghir_A05G019350	1.0526	0.0175379	2.18406	1.49334e-07
Ghir_A05G019510	-0.962146	0.129338	-2.97293	6.13736e-44
Ghir_A05G019560	1.28361	0.551568	3.55485	0.00111436
Ghir_A05G019710	1.74844	0.189224	2.52763	0.00761389
Ghir_A05G019740	-1.9063	0.000311639	-2.78212	1.37065e-18
Ghir_A05G019800	-1.21608	0.167351	-2.543	5.13963e-12
Ghir_A05G019830	-1.25879	0.349945	-4.05939	6.1531e-08
Ghir_A05G020120	-1.04811	0.000596073	-2.20578	1.05471e-10
Ghir_A05G020130.1	-1.41583	6.15723e-08	-2.94267	1.2962e-22
Ghir_A05G020460.1	-0.781707	0.283545	-2.01405	5.08231e-05
Ghir_A05G020470.1	-1.22323	0.550277	-4.19794	4.57683e-08
Ghir_A05G020480	-1.14985	0.060147	-3.15389	4.29522e-06
Ghir_A05G020590.1	-2.38631	0.0155563	-4.10326	1.00309e-06
Ghir_A05G021020	-1.08375	0.00460301	-2.40436	9.77703e-09
Ghir_A05G021110	-1.80707	0.0648468	-2.68077	0.00117684
Ghir_A05G021280	-0.416217	0.885651	-3.18827	0.000886271
Ghir_A05G021290.1	-1.76578	0.0397205	-4.90426	5.91657e-12
Ghir_A05G021330	-1.05379	0.143591	-2.0631	2.84542e-05
Ghir_A05G021350	-1.90588	0.00112214	-2.27593	1.42373e-16
Ghir_A05G021420	-0.00876873	0.993948	-2.09499	0.00215398
Ghir_A05G021480	-0.714669	0.125191	-2.29238	2.38834e-12
Ghir_A05G021750	-1.32168	0.0243844	-3.79846	8.14965e-10
Ghir_A05G022140	-1.63465	0.166749	-2.15421	0.00107789
Ghir_A05G022630	1.45936	0.282374	2.03925	0.00343042
Ghir_A05G022960	-1.27863	0.0013435	-3.77374	7.64285e-19
Ghir_A05G022970	-1.64759	0.00159236	-3.56839	0.00248352
Ghir_A05G023090.1	1.46285	0.0477308	2.07784	6.05474e-05
Ghir_A05G023210	-0.794425	0.136847	-2.51727	2.2743e-06
Ghir_A05G023480	-2.30442	0.0415146	-3.92896	1.19312e-06
Ghir_A05G023710.1	1.89212	0.236766	3.90854	0.0022967
Ghir_A05G024030	-1.6867	0.0511845	-2.31204	0.000770807
Ghir_A05G024110.1	-0.535247	0.751349	-3.52253	2.02203e-05
Ghir_A05G024230	2.04774	0.060147	2.47382	0.00027231
Ghir_A05G024240	1.92745	0.227992	3.50194	0.0043085
Ghir_A05G024250.1	-1.52191	0.108979	-2.66134	3.05662e-06
Ghir_A05G024810	1.97582	0.034428	3.54245	2.45909e-09
Ghir_A05G024890	0.752162	0.763376	3.66159	0.00758473
Ghir_A05G025010	-1.80305	0.000262815	-4.71467	1.15226e-19
Ghir_A05G025010.3	-0.666145	0.608624	-4.14968	3.11345e-10
Ghir_A05G025340.1	-2.2372	0.0102327	-2.70907	9.1119e-05
Ghir_A05G026120	0.927784	0.687948	4.05419	0.00168975
Ghir_A05G026280	1.18835	0.454	2.08222	0.000744035
Ghir_A05G026340	-1.19685	0.0272306	-4.68969	5.79559e-28
Ghir_A05G026470	-1.76054	1.17692e-06	-3.31256	9.178e-07
Ghir_A05G026620	-0.996635	0.362792	-2.15688	0.00405806
Ghir_A05G026630	-1.33658	0.0158137	-2.4545	7.64867e-13
Ghir_A05G026690	-1.221	0.404225	-2.67625	5.92044e-05
Ghir_A05G026700	1.50333	0.0167011	2.05588	1.3741e-13
Ghir_A05G026950	-0.860193	0.219997	-2.38249	1.16089e-05
Ghir_A05G027050	-1.67163	0.0343473	-4.93337	1.61828e-44
Ghir_A05G027760	1.83567	0.135993	3.04638	0.000237604
Ghir_A05G027810.1	1.84128	0.118837	2.19257	0.00977751
Ghir_A05G027880	0.590554	0.823807	6.60053	4.42941e-10
Ghir_A05G027890	0.587681	0.82409	7.04271	5.21279e-14
Ghir_A05G027980	1.4395	0.0585521	2.36464	4.7861e-11
Ghir_A05G028000	-1.41482	0.0758018	-2.06364	4.9871e-05
Ghir_A05G028010	-0.387616	0.883129	-2.08493	1.96953e-07
Ghir_A05G028310	1.87519	0.243408	4.19408	0.000764334
Ghir_A05G028400	1.99584	0.00277915	3.14117	2.45341e-11
Ghir_A05G028630	1.23084	0.556678	3.04026	0.00106748
Ghir_A05G028670.1	-1.09249	0.0585255	-2.82691	1.54634e-08
Ghir_A05G028850	-0.92347	0.601222	-4.60226	2.4522e-13
Ghir_A05G028960	2.08001	0.163732	5.0251	9.62787e-06
Ghir_A05G029260	-1.5843	5.03048e-06	-2.17494	3.01944e-19
Ghir_A05G029270.3	-0.809493	0.460131	-3.30039	1.24424e-16
Ghir_A05G029330	-1.19642	4.3146e-07	-2.04681	7.63551e-35
Ghir_A05G029390	-1.05002	0.612623	-2.29723	0.00036138
Ghir_A05G029430	-1.05838	0.156302	-2.09478	2.49703e-06
Ghir_A05G029510	-1.24688	0.0304304	-2.43883	2.04618e-11
Ghir_A05G030340	-1.81174	0.0035975	-4.81118	2.32024e-12
Ghir_A05G030580	-1.93985	0.218421	-3.67578	0.00643686
Ghir_A05G030710.1	-1.42798	0.273318	-2.41685	0.00267873
Ghir_A05G030730	-1.24804	0.235548	-3.85249	3.48161e-08
Ghir_A05G030970	1.87527	0.214567	2.83608	0.00918053
Ghir_A05G030970.1	2.10823	0.083451	3.13214	0.000443769
Ghir_A05G031090	0.989361	0.395509	2.2645	1.0335e-07
Ghir_A05G031410	-1.77006	1.08046e-07	-2.36488	1.60991e-17
Ghir_A05G031740.1	-1.71975	0.000670876	-4.25877	5.44785e-27
Ghir_A05G031800	1.09474	0.0981295	2.15606	3.63089e-07
Ghir_A05G031930	-1.58538	0.00405227	-3.24164	1.1262e-42
Ghir_A05G032330	-1.89376	4.24732e-07	-4.97554	5.44192e-25
Ghir_A05G032400	-1.31164	0.0659925	-2.7773	1.0306e-55
Ghir_A05G032460	-1.57276	0.092317	-4.12785	0.00075818
Ghir_A05G032480	1.65907	0.332957	3.76146	0.00422181
Ghir_A05G032490.1	-1.03698	0.0777728	-3.28541	1.25704e-10
Ghir_A05G032570.8	-1.15529	0.126664	-4.61427	8.4307e-26
Ghir_A05G032590	2.10437	0.065037	4.07339	5.3934e-10
Ghir_A05G033410	-0.351867	0.929986	-4.19689	0.00140148
Ghir_A05G033660.1	1.42274	0.42328	2.54006	0.00281629
Ghir_A05G033770	1.55731	5.84482e-07	2.03855	4.39066e-17
Ghir_A05G034000	-0.663427	0.581511	-3.83397	3.24289e-09
Ghir_A05G034730	1.9421	1.63443e-05	2.33564	9.9714e-09
Ghir_A05G034990.1	1.84758	0.219254	3.19132	3.68779e-05
Ghir_A05G035400	-1.73684	0.125875	-2.00529	0.00457689
Ghir_A05G036010	1.82391	0.135954	2.54645	0.000184657
Ghir_A05G036110	-0.982929	0.0796331	-2.05479	3.92755e-15
Ghir_A05G036280	-0.632106	0.372176	-2.81501	0.000147599
Ghir_A05G036390.1	-1.98399	3.19229e-06	-2.32858	1.55483e-17
Ghir_A05G036420	-1.09429	0.0187865	-2.80335	1.15308e-11
Ghir_A05G037060.1	-0.954484	0.037931	-2.10245	2.94607e-05
Ghir_A05G037410	-1.61528	0.00716809	-3.2576	2.05184e-10
Ghir_A05G037630.1	0.0470511	0.991629	-3.43505	0.00233259
Ghir_A05G037750	1.35999	0.477004	4.28551	0.000502701
Ghir_A05G037840	-1.81284	0.120605	-3.62467	3.81896e-16
Ghir_A05G037840.1	-1.53843	0.143987	-4.23743	8.43777e-12
Ghir_A05G037850	-0.399816	0.540055	-2.02813	2.50717e-06
Ghir_A05G037940	-0.772187	0.434645	-2.2541	0.0014743
Ghir_A05G038050	1.5504	0.0438723	2.31921	6.97335e-09
Ghir_A05G038070	-2.50342	0.0108317	-3.63878	3.45219e-05
Ghir_A05G038190	1.84016	0.155169	2.67209	0.00139295
Ghir_A05G038580	2.03539	0.158196	3.10456	0.00210184
Ghir_A05G038650.2	2.5194	0.034119	3.25219	0.000191334
Ghir_A05G039410	-1.68829	2.99727e-07	-2.21694	6.08957e-16
Ghir_A05G039480	-0.62909	0.357546	-3.58336	1.40201e-08
Ghir_A05G039600	0.763113	0.776593	4.18359	0.000783624
Ghir_A05G039650	1.7675	0.0704862	2.66349	0.00320106
Ghir_A05G039680	-1.48606	0.0107067	-2.69791	9.52627e-05
Ghir_A05G039760	1.38568	0.393847	2.31431	0.0040825
Ghir_A05G039870	-1.87685	0.0161956	-2.62051	0.000715876
Ghir_A05G039880	-0.840995	0.346788	-2.05383	0.00219834
Ghir_A05G040260	-0.0631499	0.965193	-2.22692	0.00418682
Ghir_A05G040430	-1.81514	8.04357e-06	-2.613	3.5661e-05
Ghir_A05G040610	-1.14375	0.488359	-2.9109	0.00136223
Ghir_A05G040620	-1.11192	0.433701	-2.18997	0.000302576
Ghir_A05G040710	1.26907	0.141232	2.23448	2.54219e-06
Ghir_A05G040780	-1.82111	0.00330262	-4.02319	9.31763e-34
Ghir_A05G041300	0.954957	0.645791	2.18344	0.00131853
Ghir_A05G041490	0.898201	0.318775	2.28386	4.57103e-07
Ghir_A05G041550	-0.0281137	0.99256	-2.56976	4.18383e-08
Ghir_A05G041590	0.199484	0.955617	4.60559	4.04956e-09
Ghir_A05G041750.1	-1.15972	0.0010246	-2.72678	1.97981e-10
Ghir_A05G041920	-1.00837	0.253451	-2.55229	3.98897e-07
Ghir_A05G042530	-1.3142	0.000169692	-2.05432	1.06102e-12
Ghir_A05G042530.1	-1.39988	0.00221483	-2.88307	7.99793e-09
Ghir_A05G042790	1.97312	0.00979793	2.79837	1.60992e-09
Ghir_A05G043440	1.262	0.374435	2.05163	0.00309616
Ghir_A06G000100.1	-2.41819	0.0432292	-5.81181	2.17033e-09
Ghir_A06G000260	-0.738962	0.294096	-2.14081	9.45864e-17
Ghir_A06G000280	-1.66749	0.0168325	-3.20198	3.48115e-16
Ghir_A06G000580	1.57022	0.0408518	2.36418	3.22097e-08
Ghir_A06G001210.1	-0.407371	0.542017	-2.60777	3.1781e-15
Ghir_A06G001310	2.83754	0.0127532	4.61762	5.43283e-08
Ghir_A06G001490	-0.867948	0.656717	-2.3901	0.000151715
Ghir_A06G001560.1	-1.93332	0.0322911	-2.4029	0.000664188
Ghir_A06G001640	1.56705	0.0150913	2.04257	2.41434e-07
Ghir_A06G001720	1.9163	0.199041	2.82981	0.00425757
Ghir_A06G001790	1.21512	0.396562	2.04411	0.00484238
Ghir_A06G001820	0.899253	0.709854	5.17106	1.03416e-07
Ghir_A06G001920	1.65119	0.0481591	2.56463	1.02645e-10
Ghir_A06G001940	1.13953	0.51689	2.02376	0.0040426
Ghir_A06G002190	1.71884	0.000324006	2.60944	9.41859e-17
Ghir_A06G002290	-0.43347	0.798661	-2.41596	0.000208152
Ghir_A06G002450	1.36968	0.432713	2.75208	0.00201631
Ghir_A06G002510	2.03696	0.0936703	2.99028	0.000125627
Ghir_A06G002580.1	-1.84885	0.00060892	-3.13556	5.96603e-27
Ghir_A06G002810	-0.984258	0.340956	-2.32653	2.51243e-05
Ghir_A06G002810.1	-1.16346	0.226413	-2.91351	5.32742e-18
Ghir_A06G002930	1.39002	0.139128	2.06792	0.00155407
Ghir_A06G003340	1.76157	0.0518422	2.59232	1.6624e-05
Ghir_A06G003670	-1.68051	6.28222e-09	-2.29132	3.41873e-20
Ghir_A06G003890	-1.09748	0.245202	-3.05969	5.82828e-22
Ghir_A06G004230	-1.34905	0.000189881	-3.3361	6.79274e-40
Ghir_A06G004230.1	0.290651	0.91361	-2.09554	0.00611584
Ghir_A06G004440	1.08844	0.462468	2.07712	0.000999009
Ghir_A06G004580	1.81267	0.237468	2.86413	0.00249633
Ghir_A06G004750.1	1.54125	0.41983	3.4409	0.00287013
Ghir_A06G005190	-0.51553	0.833417	-3.32504	0.00586279
Ghir_A06G006120.1	-1.99011	7.37964e-09	-3.63555	1.82654e-18
Ghir_A06G006150	1.31391	0.384916	2.01567	0.0099022
Ghir_A06G006930	-1.10456	0.011055	-2.30699	3.89804e-13
Ghir_A06G007140	1.68255	0.0944903	2.72584	0.00027003
Ghir_A06G007520	-0.469969	0.906207	-3.97285	7.53931e-05
Ghir_A06G007980.1	-1.03785	0.139697	-2.5652	4.13091e-13
Ghir_A06G008090	-0.70116	0.598838	-3.18745	0.000114637
Ghir_A06G008110	-0.984199	0.383163	-2.15546	4.40045e-06
Ghir_A06G008150	1.41377	0.215407	2.19673	0.00312921
Ghir_A06G008480	1.48287	0.01593	2.46748	6.74197e-10
Ghir_A06G008800	1.67871	0.305851	2.78329	0.00646439
Ghir_A06G009010	1.81582	0.000429663	2.49757	2.88407e-08
Ghir_A06G009130.2	-1.27639	0.0606794	-2.02118	8.65456e-10
Ghir_A06G009240	-0.771878	0.188743	-2.93532	9.23661e-05
Ghir_A06G009990	1.79652	0.280042	3.22103	0.00366877
Ghir_A06G010300	1.48312	0.309568	2.5612	0.00207834
Ghir_A06G010720	-1.71284	0.0318746	-3.95302	1.46727e-11
Ghir_A06G010850	2.18543	0.0926557	3.41953	0.000131194
Ghir_A06G010870.1	0.287429	0.819044	-2.29191	0.000558799
Ghir_A06G012080	-0.668519	0.784644	-2.18355	0.00153108
Ghir_A06G012610	-1.49373	0.154111	-4.14726	1.836e-09
Ghir_A06G012700	1.31745	0.121612	2.07049	4.436e-07
Ghir_A06G012860.1	-1.0343	0.190425	-2.32025	2.54923e-06
Ghir_A06G012870	-1.27697	0.109983	-2.58391	1.1705e-07
Ghir_A06G012870.1	-2.04194	0.179486	-8.43299	5.40229e-23
Ghir_A06G013400.1	-1.25766	0.0982041	-2.25098	2.52e-09
Ghir_A06G013680	-1.79874	2.28117e-10	-2.67573	1.94509e-19
Ghir_A06G013680.3	-1.18186	0.0175437	-3.39637	3.40152e-12
Ghir_A06G013900	0.588154	0.823949	3.92599	0.00376431
Ghir_A06G014130	1.25337	0.0314685	2.39835	2.60275e-08
Ghir_A06G014300	1.57962	0.200187	2.70703	0.0001413
Ghir_A06G014400	-1.47404	1.3406e-05	-2.12907	7.79731e-10
Ghir_A06G014470.1	-0.974057	0.137259	-4.96617	3.6483e-12
Ghir_A06G014690.5	0.045981	0.983223	-3.01871	0.000205746
Ghir_A06G014730	1.53044	0.0168325	2.29818	9.47078e-09
Ghir_A06G015040	-1.48429	0.00039742	-2.60778	5.16993e-05
Ghir_A06G015070	1.13171	0.290995	3.5724	1.18355e-08
Ghir_A06G015140	1.90433	0.234545	4.0535	0.000409183
Ghir_A06G015210.1	-1.72174	0.0022734	-3.51726	2.71291e-29
Ghir_A06G015410	-1.37472	0.014807	-3.12065	4.6107e-08
Ghir_A06G015950	2.15928	0.141839	3.80882	0.000531617
Ghir_A06G016290.1	-0.576875	0.725928	-4.21296	5.75089e-10
Ghir_A06G016420	1.25739	0.53586	2.8749	0.00897434
Ghir_A06G016650	-0.421212	0.903694	-2.51983	8.70975e-07
Ghir_A06G016760	1.70809	0.327227	3.51431	0.00324997
Ghir_A06G016920	-0.845309	0.431923	-3.44772	2.93994e-22
Ghir_A06G016940.1	1.43263	0.222644	2.2132	5.51968e-06
Ghir_A06G017260	-0.97906	0.00163191	-2.48733	0.0018082
Ghir_A06G017440	-0.930891	0.109485	-2.59363	6.09897e-18
Ghir_A06G017720	-1.0061	0.0238575	-2.24242	9.50361e-08
Ghir_A06G018280	-1.26534	0.351797	-4.09046	0.00106824
Ghir_A06G018280.1	-1.9966	0.0204604	-3.21275	1.09966e-07
Ghir_A06G018530	1.67119	0.135866	2.98593	1.55916e-05
Ghir_A06G018920	1.55199	0.411888	3.18744	0.000183373
Ghir_A06G018960	0.73395	0.762584	2.72596	0.00663002
Ghir_A06G019210	-1.65414	2.08483e-10	-2.10616	1.66266e-13
Ghir_A06G019350	1.42649	0.160429	2.5207	5.72159e-06
Ghir_A06G019490	-1.88428	5.92333e-06	-2.25779	9.23996e-20
Ghir_A06G019580	-1.73559	3.99407e-06	-2.19372	3.89951e-17
Ghir_A06G019760	1.88143	0.0370832	2.03751	0.00758698
Ghir_A06G020150	2.5863	0.0224321	4.46782	1.01157e-08
Ghir_A06G020270	-0.291295	0.871423	-2.45107	1.805e-05
Ghir_A06G020580	-0.543505	0.897468	-5.19614	2.88476e-06
Ghir_A06G020830.1	0.808111	0.743788	3.86948	0.00276947
Ghir_A06G020980	0.946164	0.678829	3.71274	0.00640487
Ghir_A06G021090.1	1.78974	3.98792e-05	2.60508	1.07432e-08
Ghir_A06G021540	1.30341	0.379735	2.18961	0.00176136
Ghir_A06G021820	-2.51654	0.0143027	-3.55273	0.000143608
Ghir_A06G022540	1.77539	0.288764	3.13981	0.00318839
Ghir_A06G022720	1.88693	0.0688699	2.33357	0.00382859
Ghir_A06G022750	-1.4378	0.0576237	-2.11499	2.14354e-05
Ghir_A06G022750.1	-1.2697	0.00526648	-3.17386	8.30028e-11
Ghir_A06G022820	-0.383301	0.617052	-2.01883	3.57363e-06
Ghir_A06G022930	-1.43705	0.000514076	-2.82616	3.46768e-22
Ghir_A06G022930.2	-0.549075	0.806529	-4.59044	1.35374e-28
Ghir_A06G022940	0.161852	0.944011	5.57568	1.37834e-07
Ghir_A07G000210	-1.04379	0.364686	-2.4554	0.000108268
Ghir_A07G000570.1	1.00736	0.660039	2.29257	0.00394097
Ghir_A07G000620	-1.54928	4.02438e-05	-2.77704	5.85877e-16
Ghir_A07G000810	1.96353	0.0208962	2.5383	0.00512195
Ghir_A07G000940	2.3513	0.0888764	4.27751	1.7552e-05
Ghir_A07G000990	1.2741	0.120479	2.74966	1.1068e-11
Ghir_A07G001990	0.972127	0.470894	2.40468	0.000748246
Ghir_A07G002000	0.589706	0.823919	6.79304	1.63643e-11
Ghir_A07G002060	0.937659	0.738715	6.47493	2.54502e-16
Ghir_A07G002270	2.60219	0.0419518	3.66325	0.0032017
Ghir_A07G002280	-0.917632	0.407687	-4.67749	3.66663e-14
Ghir_A07G002460	1.968	0.014807	3.87992	2.31053e-09
Ghir_A07G002850	1.73413	0.318954	3.88184	0.000873763
Ghir_A07G002920.1	-1.20711	2.38289e-05	-3.25181	1.48619e-22
Ghir_A07G003230	0.914629	0.692924	3.62741	0.00722897
Ghir_A07G003450.1	1.65566	0.290405	3.04396	0.00178807
Ghir_A07G003660	1.62273	0.00744997	2.59839	2.59027e-09
Ghir_A07G003670	-1.98133	0.0344987	-3.95909	1.20538e-06
Ghir_A07G003710	1.74752	0.14879	2.37442	0.00072837
Ghir_A07G003830	-1.89448	3.40657e-05	-3.66929	2.27012e-25
Ghir_A07G004220	-1.41587	8.99844e-09	-2.12592	1.74998e-13
Ghir_A07G004240	1.29842	0.325306	2.1958	0.000337439
Ghir_A07G004280	-1.38289	0.0029379	-2.29926	5.60856e-11
Ghir_A07G004330	1.56461	0.282374	2.52675	0.00151213
Ghir_A07G004530.1	2.05184	0.162295	3.03802	0.00961334
Ghir_A07G004560	2.08209	0.167699	3.9378	0.002388
Ghir_A07G004700	0.834057	0.416693	2.22844	7.01643e-05
Ghir_A07G004780	1.3786	0.219474	2.25062	5.58721e-05
Ghir_A07G005020.1	0.850517	0.738351	3.39416	0.00530645
Ghir_A07G005210	-2.13027	0.0656799	-2.44393	0.00679704
Ghir_A07G005550	-1.42697	0.0755925	-2.05276	2.0593e-07
Ghir_A07G005710	1.45509	0.164922	2.00316	0.000304506
Ghir_A07G006060	-0.746497	0.600544	-2.17839	0.0023417
Ghir_A07G006060.1	-0.713743	0.840208	-3.51534	0.0001774
Ghir_A07G007040	1.44268	0.00332326	2.92251	2.17083e-17
Ghir_A07G007120	-0.710515	0.477623	-2.2516	0.000106026
Ghir_A07G007290	-0.948103	0.578434	-2.52546	0.000645458
Ghir_A07G007580.2	-1.36885	0.048774	-5.68514	3.16533e-19
Ghir_A07G007590	-0.369447	0.854898	-2.55017	0.00108123
Ghir_A07G007600	-1.78182	0.0725788	-2.381	1.34342e-05
Ghir_A07G007600.1	-1.18258	0.234889	-3.88644	1.05996e-16
Ghir_A07G007840	1.75862	0.00343431	2.76575	2.09667e-07
Ghir_A07G008240	1.81033	0.0308751	2.87499	7.27241e-07
Ghir_A07G008430	-1.75977	0.00997446	-4.31028	1.77031e-07
Ghir_A07G008950	-0.741738	0.106449	-2.61706	0.000173031
Ghir_A07G009100	-1.18598	0.121518	-2.5577	1.81954e-07
Ghir_A07G009110	0.616919	0.819557	4.53143	0.000102882
Ghir_A07G009110.1	-0.462259	0.886933	-4.72717	1.3496e-09
Ghir_A07G009580	-1.30375	0.000515384	-2.53966	3.17295e-27
Ghir_A07G009610	0.881497	0.560188	2.7863	1.50587e-10
Ghir_A07G009690.1	-1.97009	0.0951798	-3.05754	5.81565e-08
Ghir_A07G010360.1	1.17417	0.586506	2.26199	0.00174228
Ghir_A07G010680	1.31275	0.0152417	3.00285	6.17204e-11
Ghir_A07G010720	-1.49627	0.000562545	-2.38107	6.34117e-07
Ghir_A07G011050	-0.991975	0.00576718	-2.31125	1.39293e-10
Ghir_A07G011090	1.62033	0.173893	2.60749	0.000397042
Ghir_A07G011510	-1.57598	0.0756662	-2.01406	0.000511444
Ghir_A07G011680	-1.63882	1.29185e-08	-4.25389	2.96854e-07
Ghir_A07G011830	-1.52409	0.00113701	-3.89393	1.02966e-11
Ghir_A07G011840.1	-1.37386	0.0222141	-2.44619	1.45454e-05
Ghir_A07G011930	-0.60096	0.241795	-2.16712	0.000796831
Ghir_A07G012500.1	-0.155908	0.954753	-2.13942	0.000383589
Ghir_A07G012630.1	1.86442	5.04067e-09	2.47352	1.11017e-09
Ghir_A07G013320.2	0.59298	0.823919	3.81596	0.00367117
Ghir_A07G013810	-0.356324	0.760399	-2.35796	0.000193676
Ghir_A07G014530	-1.28718	4.97438e-06	-2.81449	2.459e-12
Ghir_A07G014690	-0.402759	0.755107	-3.06772	3.71971e-06
Ghir_A07G014730.1	-1.06721	0.0585551	-2.27776	1.62968e-12
Ghir_A07G015030	0.817514	0.735725	6.27335	1.69809e-10
Ghir_A07G015350	-1.37863	0.514648	-5.28194	4.37792e-06
Ghir_A07G015600	-1.59253	0.138634	-2.33005	0.00117906
Ghir_A07G015760	1.31096	0.292022	2.24224	0.0014697
Ghir_A07G015870	-0.75843	0.612549	-3.05299	1.18952e-05
Ghir_A07G016260	-1.10346	0.0085505	-2.05918	3.40182e-06
Ghir_A07G016840	-1.65887	0.00113437	-2.54619	1.90414e-12
Ghir_A07G017000	1.4019	0.0353695	2.09804	1.23375e-11
Ghir_A07G017350	-1.49782	0.134101	-3.16702	5.76564e-07
Ghir_A07G017430	1.78824	0.0125074	3.14142	1.12398e-11
Ghir_A07G017450	1.37904	0.0206989	2.06392	7.60537e-09
Ghir_A07G017660	-1.71088	0.00228052	-2.83435	1.84587e-13
Ghir_A07G017950	-1.80132	0.000349211	-3.95867	9.40513e-15
Ghir_A07G017990	-1.49407	0.000615274	-3.18658	7.27309e-22
Ghir_A07G018330	-1.2501	0.00708369	-2.16983	1.17129e-11
Ghir_A07G018490	-0.95208	0.0507281	-2.41622	6.79297e-21
Ghir_A07G018570			3.75356	0.00636341
Ghir_A07G018800	-1.76558	0.00495819	-4.3197	1.98492e-16
Ghir_A07G019430	0.919501	0.654676	2.03518	0.00133271
Ghir_A07G020550	-0.146424	0.944011	-2.43265	0.00348235
Ghir_A07G020710	-1.83345	0.0248251	-2.75009	3.33285e-07
Ghir_A07G020840	0.378315	0.851409	3.31217	8.93211e-08
Ghir_A07G020990.1	1.33728	0.526074	3.3819	0.00523086
Ghir_A07G021090	-1.20544	0.0594138	-2.19652	1.01943e-15
Ghir_A07G021110.1	-1.72674	0.00132193	-2.24816	3.4437e-08
Ghir_A07G021330	1.87006	0.0562817	3.13458	4.95703e-07
Ghir_A07G021370	-1.6988	0.00972289	-3.45965	1.94047e-22
Ghir_A07G021370.1	-1.63804	0.101112	-2.85674	0.00184087
Ghir_A07G021380	-1.22305	0.123431	-2.5674	0.000331322
Ghir_A07G021390	-0.748215	0.185764	-2.09541	1.36948e-10
Ghir_A07G021550	-1.74303	2.54961e-07	-3.00532	3.21108e-27
Ghir_A07G021640	1.20116	0.0256982	2.22863	6.71873e-18
Ghir_A07G022080	-1.56684	3.3637e-07	-3.19157	1.02955e-14
Ghir_A07G022130.1	0.529016	0.617969	-2.07964	0.00187891
Ghir_A07G022420	1.5504	0.0184905	2.46432	1.60091e-09
Ghir_A07G023080	1.4727	0.168085	2.27207	0.00156011
Ghir_A07G023100	2.03319	0.165756	3.18836	0.00343386
Ghir_A07G023430	-1.07317	0.0553734	-4.22549	2.42928e-06
Ghir_A07G023460	-1.02763	0.161924	-2.23954	1.64188e-06
Ghir_A07G024800	-0.814975	0.286596	-3.49689	5.71274e-06
Ghir_A07G024850.1	-0.92966	0.437888	-4.53193	1.92984e-06
Ghir_A07G024930	1.73192	0.00155396	2.08944	1.31894e-10
Ghir_A08G000250	1.76631	0.283487	4.14251	0.000905282
Ghir_A08G000260	2.09193	0.106614	2.87122	0.00222386
Ghir_A08G000370	1.68102	0.178923	2.12947	0.00891473
Ghir_A08G000390	1.84031	0.26826	3.48468	0.000284642
Ghir_A08G000430	2.49872	0.0580895	3.69651	0.000558799
Ghir_A08G000580	1.90961	0.133092	2.3816	0.00105249
Ghir_A08G000690	1.2006	0.603329	3.27919	0.00483994
Ghir_A08G000800	2.09694	0.16047	3.83152	6.28357e-05
Ghir_A08G001160.2	0.762089	0.827933	2.3431	0.00380759
Ghir_A08G001170	-1.34712	0.0559155	-2.817	8.83531e-16
Ghir_A08G002120	1.72601	0.247145	2.82024	0.00221391
Ghir_A08G002160.1	1.73861	0.0773798	2.15421	0.00115022
Ghir_A08G002600	-1.17643	0.00205522	-2.01098	1.46198e-10
Ghir_A08G002820	-1.83404	0.0111429	-5.22123	1.36961e-13
Ghir_A08G002860	-1.0064	0.189224	-3.31837	2.57869e-07
Ghir_A08G002940	-1.93783	0.031341	-3.07866	1.96804e-06
Ghir_A08G003170	-0.564764	0.801307	-2.11178	1.38908e-06
Ghir_A08G003300	1.22078	0.603434	2.72712	0.00676125
Ghir_A08G003600	1.40023	0.00779051	2.51114	9.5851e-24
Ghir_A08G003680.1	1.6361	0.344142	3.55304	0.00922835
Ghir_A08G003900	1.89834	0.190737	3.73598	4.65517e-06
Ghir_A08G004030	-1.68527	0.0650801	-2.48028	0.00174772
Ghir_A08G004750	-1.63289	0.105536	-2.36653	0.00527498
Ghir_A08G004810	2.15132	0.0656032	2.98166	0.00103643
Ghir_A08G006730	-1.50843	0.0183989	-4.02996	0.000355172
Ghir_A08G006830	-1.19014	0.0225777	-2.61094	4.36996e-19
Ghir_A08G006890	-1.07037	0.0146794	-2.77757	1.97335e-14
Ghir_A08G007160	1.3682	0.22482	2.26135	2.06782e-05
Ghir_A08G007620	1.37545	0.433865	2.43096	0.000777815
Ghir_A08G007650	2.09802	0.163771	4.01058	3.22586e-05
Ghir_A08G007660.1	-0.139192	0.944011	-2.3432	2.96601e-07
Ghir_A08G007740	1.93053	6.58324e-09	2.89349	1.37288e-25
Ghir_A08G008210	-1.0887	0.00110572	-2.50224	7.00784e-20
Ghir_A08G008340	-1.47288	0.00208637	-3.09443	2.608e-10
Ghir_A08G008490	1.46585	0.0638897	2.58944	1.26366e-09
Ghir_A08G008520	-1.28798	0.291894	-3.18178	1.16245e-06
Ghir_A08G009000	-0.562962	0.798177	-2.83712	0.0025068
Ghir_A08G009190	-0.451312	0.608317	-2.16027	0.00904635
Ghir_A08G009190.1	-0.914305	0.0347046	-2.51435	1.60048e-16
Ghir_A08G009200	-1.61708	0.210027	-2.20061	0.00171554
Ghir_A08G009240	1.82185	0.256398	2.83569	0.00681724
Ghir_A08G009450	0.18181	0.944011	2.40798	0.000941005
Ghir_A08G009820.1	1.72722	0.229544	2.32202	4.31052e-05
Ghir_A08G009900	-1.14218	0.019036	-3.43785	6.80152e-06
Ghir_A08G010300	1.042	0.643192	3.56415	0.00777751
Ghir_A08G010510	-0.362892	0.81884	-2.38877	0.00205943
Ghir_A08G010800	-0.74723	0.280179	-2.86115	8.61753e-06
Ghir_A08G010810	-1.99464	4.2632e-07	-2.72627	1.52107e-15
Ghir_A08G010820	-1.62045	0.0013435	-3.12108	9.53509e-10
Ghir_A08G010820.1	-1.59205	1.68386e-05	-2.81291	8.52216e-20
Ghir_A08G010920	-1.07823	0.641692	-3.27339	0.00426679
Ghir_A08G011130	1.59776	0.00735336	2.58851	1.23168e-12
Ghir_A08G011250	1.49094	0.412898	3.21094	0.000927781
Ghir_A08G011350	-0.952192	0.0123257	-2.54335	4.76791e-10
Ghir_A08G011570	-0.131919	0.944011	-2.27519	0.00615809
Ghir_A08G011570.1	-1.81824	0.0731634	-5.70618	6.299e-08
Ghir_A08G011860	-1.5998	0.0736057	-2.52727	1.01384e-07
Ghir_A08G011860.1	-0.654843	0.316685	-2.37114	5.01604e-10
Ghir_A08G011870	-1.32677	0.0191757	-2.60595	3.2662e-08
Ghir_A08G012380.1	1.56506	0.407105	3.21988	0.00873392
Ghir_A08G012860	-1.16501	0.0105364	-2.37733	2.76368e-12
Ghir_A08G012900	-0.454824	0.826663	-2.78319	0.00266341
Ghir_A08G013120.1			3.90254	0.00243139
Ghir_A08G013420	-1.69578	0.000163367	-3.26519	9.01198e-26
Ghir_A08G013440	-1.79658	0.000121073	-2.74826	2.98635e-09
Ghir_A08G013440.6	-1.33491	0.0224473	-4.28135	3.60211e-80
Ghir_A08G013500	1.56973	0.37601	3.8082	0.00368427
Ghir_A08G013500.1	-0.723627	0.535601	-2.73769	1.81381e-07
Ghir_A08G013610	1.45741	0.0626586	2.08536	2.00144e-05
Ghir_A08G013920	-1.88807	4.55353e-07	-2.52943	5.21289e-10
Ghir_A08G013920.1	-0.748481	0.177524	-2.41055	1.33847e-11
Ghir_A08G014080	-1.18949	0.0242079	-2.87929	7.77833e-11
Ghir_A08G014150	-1.86298	0.0167251	-3.23321	2.03167e-06
Ghir_A08G014560	1.79337	0.278657	3.34383	0.00177827
Ghir_A08G015020	-1.35901	0.00213468	-2.07461	2.3942e-13
Ghir_A08G015140	1.48912	0.0425593	2.45012	1.09966e-07
Ghir_A08G015550	-1.13243	0.105709	-2.17661	6.64101e-05
Ghir_A08G015680	1.58145	0.234117	2.04767	0.00592845
Ghir_A08G015750	-1.03718	0.0185179	-3.66518	1.4923e-16
Ghir_A08G016270	-1.94246	0.000184255	-2.7877	6.39749e-10
Ghir_A08G016310	1.72071	0.220002	2.7492	0.000343844
Ghir_A08G016990	-0.780807	0.14519	-2.08911	5.26426e-15
Ghir_A08G017130	1.59097	0.033356	2.59808	4.76791e-10
Ghir_A08G017520	2.04364	0.0897894	3.42502	1.81025e-07
Ghir_A08G017600	1.17687	0.338079	2.17808	6.88231e-06
Ghir_A08G018160.1	-1.37294	0.0479655	-3.67864	2.90688e-08
Ghir_A08G018290	-0.902221	0.0235585	-3.30551	1.3878e-05
Ghir_A08G018540	-1.37113	0.171141	-2.70639	5.26101e-08
Ghir_A08G018670	-1.21155	0.106593	-2.60169	0.00299732
Ghir_A08G018710	-0.700236	0.706999	-2.47908	0.000870878
Ghir_A08G018820	0.901004	0.760661	3.2063	0.0052731
Ghir_A08G018870	1.19206	0.562412	2.66091	0.00579822
Ghir_A08G018910.1	-1.48459	1.73522e-07	-4.16647	9.65041e-10
Ghir_A08G019020	-0.877754	0.0805368	-2.1545	7.33961e-08
Ghir_A08G019020.1	-1.47826	0.0344987	-2.36386	1.76864e-06
Ghir_A08G019060	1.84731	0.0209213	2.17208	0.000164365
Ghir_A08G019160	2.22896	0.0488855	3.24792	0.000117089
Ghir_A08G019270	1.70768	0.318079	4.50208	2.90745e-05
Ghir_A08G019390	-0.86415	0.0214004	-2.95495	2.35903e-12
Ghir_A08G019650	0.847796	0.738351	3.44407	0.00614663
Ghir_A08G019980.1	1.43869	0.438877	4.40566	0.000228906
Ghir_A08G020340	-1.5965	0.00120235	-3.55271	2.96071e-13
Ghir_A08G020350	-0.0881484	0.976425	-2.72056	0.00369741
Ghir_A08G020380.1	-0.802036	0.310045	-2.86425	0.000417093
Ghir_A08G020530	-0.816614	0.129229	-2.04018	1.47208e-05
Ghir_A08G020910	-0.92649	0.282085	-2.79132	7.23311e-05
Ghir_A08G021030	0.0758454	0.944011	-2.20766	0.00413113
Ghir_A08G021040	-1.1556	0.0683042	-3.60597	1.4243e-06
Ghir_A08G021250	1.62099	0.295187	2.97429	0.00289067
Ghir_A08G021280	-1.45451	8.89258e-09	-3.90408	3.57881e-08
Ghir_A08G021350	-1.96806	0.00395569	-4.97836	1.32123e-21
Ghir_A08G021360	-1.49141	2.31363e-06	-2.6575	4.04826e-16
Ghir_A08G021570	1.35697	0.44627	3.32503	5.73067e-05
Ghir_A08G021590	-0.305324	0.780099	-2.02354	0.000183179
Ghir_A08G021790	-1.16856	0.152905	-3.24412	2.55158e-12
Ghir_A08G021830	1.64473	0.35409	3.6219	0.0032017
Ghir_A08G022050	1.99462	0.105109	3.13868	5.24876e-05
Ghir_A08G022380	-1.19888	0.00442842	-2.30615	9.34207e-17
Ghir_A08G022730	-1.77387	0.000733867	-3.22003	3.85686e-27
Ghir_A08G023230.1	-0.859254	0.442503	-4.55792	2.76568e-24
Ghir_A08G023240	-1.5806	0.0738099	-2.47733	1.81238e-07
Ghir_A08G023250	-1.14509	0.000492404	-2.89139	2.60167e-09
Ghir_A08G023680.1	-0.708847	0.265488	-2.34916	1.55049e-15
Ghir_A08G023960	-1.0425	0.704924	-4.82978	2.54824e-05
Ghir_A08G024500	1.70924	0.104349	3.11816	1.80381e-07
Ghir_A08G025040	-1.20345	0.0498218	-3.09207	1.75285e-11
Ghir_A08G025090	0.892608	0.57535	2.00179	4.13e-07
Ghir_A08G025110	2.22295	0.12306	3.97238	9.59455e-05
Ghir_A08G025190	1.28688	0.167811	2.41529	2.00714e-05
Ghir_A08G025290.2	0.0956318	0.953943	-2.61009	1.14326e-06
Ghir_A08G025870	-1.53593	0.238583	-3.2075	0.0087419
Ghir_A08G026110	1.19581	0.495934	2.16813	0.00524673
Ghir_A08G026160.1	-1.01619	0.15776	-2.50353	1.25079e-09
Ghir_A08G026250	1.26984	0.495549	2.50325	0.00050811
Ghir_A08G026280	-0.75805	0.30444	-2.50654	1.87226e-06
Ghir_A08G026300	1.37789	0.327018	3.15452	1.71196e-07
Ghir_A08G026490.1	-1.48404	3.57389e-05	-3.29806	9.18398e-20
Ghir_A08G026710	1.90819	0.235343	3.77854	0.00029903
Ghir_A09G000960	-0.787474	0.0682735	-2.04254	3.72652e-09
Ghir_A09G001350	-1.0546	0.0560662	-2.44129	2.63329e-08
Ghir_A09G001460	-0.968108	0.594748	-2.18272	0.00433802
Ghir_A09G001660	1.82482	0.118951	2.95589	2.84988e-07
Ghir_A09G002600	1.6366	0.242532	3.3206	6.81929e-06
Ghir_A09G003640	1.59325	0.0431029	2.28625	3.0825e-06
Ghir_A09G004210	-0.895746	0.266162	-3.58025	5.91789e-12
Ghir_A09G004220.1	-1.23919	0.00115355	-3.80305	6.96162e-10
Ghir_A09G004700	-1.93484	0.0541853	-4.62029	0.000216423
Ghir_A09G004740	-1.17674	0.332028	-2.13388	0.002922
Ghir_A09G005160	1.89661	0.212546	2.99292	0.00638706
Ghir_A09G005310	1.39644	0.298034	2.23568	0.00170049
Ghir_A09G005520	1.77298	0.000173815	2.90163	2.56817e-09
Ghir_A09G005560	-1.10135	0.446126	-3.63886	6.40476e-05
Ghir_A09G005760.1	-0.806592	0.289909	-3.34584	1.51327e-06
Ghir_A09G005770	-0.563004	0.717195	-2.61117	3.28761e-05
Ghir_A09G005780	-0.862555	0.201204	-8.01379	9.79528e-20
Ghir_A09G005940.1	1.39772	0.436085	3.34676	0.000121634
Ghir_A09G006930	1.81129	0.138832	2.80306	0.00139297
Ghir_A09G007190	1.10213	0.611155	4.38894	0.000256932
Ghir_A09G007650.1	-1.14299	0.328458	-3.43621	1.39917e-10
Ghir_A09G007670	1.9972	0.0569786	4.16364	1.153e-13
Ghir_A09G007770	-0.35154	0.927057	-4.06573	1.23422e-24
Ghir_A09G007940	1.81365	0.0033922	2.38989	3.25659e-08
Ghir_A09G008490	1.44835	0.434794	4.44176	0.000231817
Ghir_A09G009610	2.56422	0.0516896	4.70272	1.50823e-05
Ghir_A09G009630	1.83766	0.262323	4.14099	0.00016872
Ghir_A09G010250	-2.0129	0.031341	-4.83827	1.11569e-05
Ghir_A09G010460	-1.54442	0.0228513	-4.50901	0.00013027
Ghir_A09G010710	1.77962	0.15689	2.33051	0.00300886
Ghir_A09G010820	-1.16924	0.191083	-2.94069	0.00130742
Ghir_A09G011150	-0.697656	0.59639	-2.37647	1.30598e-05
Ghir_A09G011180	-0.614164	0.518725	-2.60286	8.61102e-05
Ghir_A09G011410	-1.361	0.401276	-2.61536	0.001823
Ghir_A09G011500	-1.46604	0.0685535	-2.82046	4.55527e-15
Ghir_A09G011710	0.0788931	0.964204	-2.68367	0.0017688
Ghir_A09G011720	-0.654914	0.69295	-3.44845	1.59821e-27
Ghir_A09G011720.1	-1.88828	9.04655e-07	-2.05356	5.10057e-09
Ghir_A09G011940	1.45191	0.0544445	2.00572	8.60751e-07
Ghir_A09G012010	1.1767	0.176168	2.29784	1.85726e-09
Ghir_A09G012430	-0.931369	0.218737	-2.61647	9.39962e-06
Ghir_A09G012580	-0.953574	0.122661	-2.55395	9.49675e-08
Ghir_A09G012580.1	-1.10932	0.0584323	-2.73163	1.30852e-13
Ghir_A09G012830	-1.44168	0.141232	-3.01746	4.64208e-12
Ghir_A09G013170	-0.881828	0.22929	-2.14772	3.68407e-11
Ghir_A09G013340	2.06833	0.109193	3.11689	0.000244203
Ghir_A09G014110.2	1.932	1.54355e-06	2.01826	4.48598e-07
Ghir_A09G014240	-0.902445	0.00819014	-2.4822	8.86011e-06
Ghir_A09G014390	-1.35715	0.0106223	-3.23125	1.94969e-05
Ghir_A09G014410	1.88765	0.0321453	3.50608	5.38273e-08
Ghir_A09G014600	-1.50683	0.00319857	-3.08063	1.13818e-12
Ghir_A09G014640	-0.490228	0.829109	-2.76915	0.00167724
Ghir_A09G015380	2.11933	0.120209	3.26527	0.00059176
Ghir_A09G016020	1.41465	0.168471	2.48574	4.64816e-06
Ghir_A09G016380	1.24237	0.302585	2.63475	9.69525e-05
Ghir_A09G016390	-1.18092	0.00159368	-2.08702	6.74619e-12
Ghir_A09G016630.2	1.74132	0.195265	2.34239	0.00162604
Ghir_A09G017020	-1.55727	0.00933469	-2.66704	9.39821e-25
Ghir_A09G017060	-0.414525	0.397801	-2.05788	3.11086e-11
Ghir_A09G017060.1	0.724287	0.787384	-3.58472	0.00053884
Ghir_A09G017080	-1.24877	0.000449837	-3.62796	1.76283e-33
Ghir_A09G017080.1	-1.85048	0.00165416	-3.83335	3.31377e-85
Ghir_A09G017410	1.09569	0.476807	2.41039	1.37567e-05
Ghir_A09G017450	-0.378031	0.774784	-2.48817	0.00133784
Ghir_A09G017580	-1.74727	0.00341067	-2.10956	0.000748838
Ghir_A09G017660	-1.29181	0.379979	-4.27336	2.18095e-07
Ghir_A09G018130.1	-1.08238	0.160341	-2.96392	5.55674e-08
Ghir_A09G018830	1.8414	0.267691	3.06657	0.00501672
Ghir_A09G019490	-0.318699	0.809551	-2.66124	0.00287009
Ghir_A09G020020	1.22142	0.551902	2.34246	0.00502891
Ghir_A09G020080	2.0476	0.14959	2.85979	0.000768998
Ghir_A09G020210	1.32029	0.370676	3.10629	3.55385e-05
Ghir_A09G020320.1	-0.432012	0.771681	-3.53455	1.33881e-12
Ghir_A09G020440.2	0.60327	0.82096	4.4546	0.000187666
Ghir_A09G020510.1	-0.106664	0.972442	-5.94407	1.2041e-08
Ghir_A09G020640	1.67193	0.0897894	2.30553	3.76582e-06
Ghir_A09G020850	2.17626	0.0898122	2.98775	0.00622074
Ghir_A09G021580	-1.01108	0.494147	-2.23381	0.000298816
Ghir_A09G022210	-1.23223	0.028538	-4.39557	4.18205e-11
Ghir_A09G022360	-1.75187	4.35062e-19	-2.09203	8.54318e-22
Ghir_A09G022360.1	-0.591421	0.661303	-3.02137	2.76195e-11
Ghir_A09G022580	0.960761	0.109205	2.02159	5.37836e-09
Ghir_A09G022590	1.0444	0.513385	2.62176	4.98899e-07
Ghir_A09G022710	-1.28872	0.00737502	-3.65162	1.54008e-10
Ghir_A09G023140	2.05049	0.135955	3.78221	6.73584e-05
Ghir_A09G023250	1.30737	0.469206	2.31219	0.00328281
Ghir_A09G023460	-1.44534	0.0946144	-4.05248	6.98926e-06
Ghir_A09G023600	-0.757465	0.00526001	-2.25041	5.1553e-09
Ghir_A09G023610.1	-0.229295	0.944011	-2.18237	4.9476e-08
Ghir_A09G023620	-0.973905	0.33449	-3.16557	9.00748e-08
Ghir_A09G024510.4	0.507244	0.851616	5.30191	8.33094e-07
Ghir_A09G024560	-1.72305	0.0231956	-3.6606	9.74387e-06
Ghir_A09G024620	1.15649	0.424923	2.63106	5.22201e-05
Ghir_A09G024820	-1.34216	0.0655454	-2.36299	0.000211799
Ghir_A09G024970	1.49456	0.274877	2.56698	0.00120059
Ghir_A09G025030	2.38204	0.0450541	2.86263	0.0067833
Ghir_A09G025180	1.37605	0.401424	2.08511	0.00587181
Ghir_A09G025220	1.67565	0.349463	3.86756	0.000948778
Ghir_A09G025530	-0.252649	0.907128	-2.61344	1.1988e-10
Ghir_A09G025650	1.35041	0.512477	2.55067	0.00508601
Ghir_A09G025790.1	-1.59096	0.0096351	-3.16459	7.16897e-07
Ghir_A09G025890	2.30326	0.0455544	2.68498	0.00776124
Ghir_A09G026340.1	-0.744767	0.831349	-3.34338	7.66611e-12
Ghir_A10G000120	-0.987177	0.0571791	-2.81467	3.19595e-10
Ghir_A10G000190	-2.13291	0.112012	-3.10244	0.00561405
Ghir_A10G000730	-0.281186	0.71993	-2.01158	1.06735e-10
Ghir_A10G000760	-1.24679	0.0018678	-3.02647	9.22722e-22
Ghir_A10G000860	-1.63063	0.0737164	-3.05493	0.00204718
Ghir_A10G001400.1	-0.453585	0.425493	-2.08475	2.06379e-13
Ghir_A10G001580	-1.73055	0.00202212	-3.2551	1.30213e-05
Ghir_A10G001580.1	-1.88031	0.0852791	-3.27145	0.000372648
Ghir_A10G001790	1.25593	0.0388232	2.14811	2.11982e-10
Ghir_A10G002170	-1.44625	0.0734921	-3.1471	1.90097e-12
Ghir_A10G002170.2	-1.13233	0.0573449	-2.13974	3.0322e-09
Ghir_A10G002210	1.8002	0.282081	3.75841	0.000144363
Ghir_A10G002210.1	2.02373	0.0185437	3.8441	2.38131e-10
Ghir_A10G002230.2	1.76787	0.0209236	2.72405	0.000142386
Ghir_A10G002390	1.99126	0.000167613	2.6702	1.41489e-12
Ghir_A10G002500	1.58469	0.000696756	2.0627	2.43422e-10
Ghir_A10G002720.4	1.67494	0.325772	5.55411	1.18845e-07
Ghir_A10G003150.1	-1.88392	0.0030802	-5.6157	6.64199e-16
Ghir_A10G003170	-1.10781	0.0170413	-2.71218	1.51606e-16
Ghir_A10G004020	2.1711	0.020047	3.72656	1.12283e-05
Ghir_A10G004190	2.87668	0.0105364	3.71808	0.00114679
Ghir_A10G004600	1.18508	0.048955	2.32546	1.59316e-12
Ghir_A10G004750.1	2.5807	0.0189048	3.02302	0.00183964
Ghir_A10G005160.1	-1.01017	0.225166	-2.33283	4.17977e-11
Ghir_A10G005240.1	-0.793513	0.436886	-3.25415	0.00442555
Ghir_A10G005330	-1.95897	1.22291e-05	-2.65279	7.98211e-08
Ghir_A10G005430	-1.91923	0.00223485	-4.28562	1.94279e-10
Ghir_A10G005550	-0.191582	0.72255	-2.15048	2.45407e-06
Ghir_A10G005830	-1.15447	0.315928	-2.71987	0.00258451
Ghir_A10G005840.1	1.80937	0.271688	5.12167	3.01387e-11
Ghir_A10G006340.1	-1.78341	0.0136999	-3.02234	8.79399e-15
Ghir_A10G006410	1.48765	0.378588	2.88014	0.000141774
Ghir_A10G006780.1	-0.197388	0.944011	-2.2099	3.36478e-12
Ghir_A10G007150	-0.76653	0.242077	-2.36714	4.95557e-10
Ghir_A10G007750	-1.32652	0.0878487	-2.31554	1.21151e-08
Ghir_A10G007930	-0.977291	0.574574	-2.90091	1.61389e-05
Ghir_A10G008430	-1.87288	0.000125557	-2.1472	4.50118e-07
Ghir_A10G008520	2.42188	0.07325	4.01347	0.000124636
Ghir_A10G009130	1.8709	0.000506132	2.80811	3.39787e-09
Ghir_A10G009140	1.51203	0.405316	2.78365	0.00389806
Ghir_A10G009270	-1.23582	5.45894e-05	-3.63584	8.37971e-10
Ghir_A10G009390	-1.41863	0.00436324	-3.6947	1.25325e-36
Ghir_A10G009590	-1.50762	0.000198737	-4.53273	1.04761e-13
Ghir_A10G009590.1	-0.00401843	0.99713	-2.75096	0.00815866
Ghir_A10G009690	1.70916	0.268305	2.93691	0.000186568
Ghir_A10G011300	-1.05828	0.142978	-2.02576	2.36581e-09
Ghir_A10G011320	-0.130578	0.948258	-3.00626	0.00151423
Ghir_A10G011320.4	-1.38592	0.0577412	-4.30304	8.05274e-15
Ghir_A10G012620	1.86003	0.00178777	2.11716	3.87424e-08
Ghir_A10G012690.1	1.84825	0.0182346	2.06676	0.000493677
Ghir_A10G012780	1.97493	0.102885	3.06441	0.000946085
Ghir_A10G013120	2.10998	0.103502	3.32424	0.000103649
Ghir_A10G013590.1	-1.82382	0.00114032	-2.19261	9.68316e-06
Ghir_A10G013910	0.959776	0.56626	2.07898	0.000931418
Ghir_A10G014350	-1.51569	0.0200617	-3.19997	5.10327e-14
Ghir_A10G014470	-1.58993	0.00450147	-2.74506	1.26225e-10
Ghir_A10G014600.1	-1.82569	1.47243e-07	-5.34456	1.21559e-45
Ghir_A10G014610.1	-1.50508	0.116231	-3.37879	1.97738e-05
Ghir_A10G014800	1.17467	0.144155	2.00474	6.65227e-05
Ghir_A10G015160	-0.658288	0.514727	-3.09763	1.3395e-08
Ghir_A10G015420.1	0.55038	0.853011	2.25639	0.000387351
Ghir_A10G015770	1.99337	0.0392141	3.06428	3.7888e-08
Ghir_A10G015830	-2.15429	0.0344168	-3.04567	0.00131133
Ghir_A10G015950.1	-1.33174	0.00483178	-2.45506	8.02173e-12
Ghir_A10G016020	2.34483	0.0156032	2.83957	1.45454e-05
Ghir_A10G016110	1.47586	0.418232	4.50999	0.000272774
Ghir_A10G016310	0.12145	0.970477	-2.87692	1.09523e-05
Ghir_A10G017280	-1.74581	1.0722e-08	-3.34347	1.73439e-15
Ghir_A10G017720	-1.69783	5.85644e-06	-3.56384	2.56817e-09
Ghir_A10G017780	-0.785756	0.197113	-3.09984	2.75961e-11
Ghir_A10G017940	-1.08053	0.394337	-2.64461	3.32443e-10
Ghir_A10G017940.1	-1.29723	0.287412	-3.11929	4.39119e-06
Ghir_A10G018000.1	-1.39034	0.0129958	-2.35526	3.58499e-11
Ghir_A10G018390	0.230821	0.948579	3.75213	7.61171e-06
Ghir_A10G018460	1.68792	0.197241	2.39126	0.000924918
Ghir_A10G019250	-1.76748	0.102885	-4.00612	4.65949e-09
Ghir_A10G019370	0.383936	0.944011	3.06581	0.00357218
Ghir_A10G019720	-1.55204	0.236617	-4.69895	9.38491e-08
Ghir_A10G019980	-1.26819	0.18188	-2.43748	7.39115e-07
Ghir_A10G020070	1.47416	0.0440721	2.45894	1.26382e-07
Ghir_A10G020430.1	-0.260455	0.944011	-4.06708	0.00139189
Ghir_A10G020610	-1.4904	0.101396	-3.79032	1.19244e-34
Ghir_A10G020610.1	0.853232	0.453839	-2.7636	0.000514308
Ghir_A10G020720	-1.56912	9.30186e-05	-3.05567	4.07651e-16
Ghir_A10G020930	-1.19647	0.0608739	-3.25341	5.84385e-08
Ghir_A10G020930.1	-0.508608	0.164268	-2.33108	0.00378761
Ghir_A10G021000	1.07341	0.518786	2.17174	0.00557296
Ghir_A10G021120.1	-0.977336	0.701019	-3.70201	8.10152e-05
Ghir_A10G021150	1.58216	0.376987	2.857	0.000378546
Ghir_A10G021210	0.590103	0.772105	2.45847	4.05111e-05
Ghir_A10G021510	-0.925832	0.208918	-3.99155	1.97454e-12
Ghir_A10G021710.1	0.633295	0.876147	2.58081	0.00966314
Ghir_A10G022080	-1.29878	6.05364e-05	-2.27532	1.00941e-15
Ghir_A10G023180	-1.65398	2.47267e-05	-4.5179	9.19381e-40
Ghir_A10G023180.1	-0.0370637	0.985641	-2.75857	0.000205969
Ghir_A10G023900.1	0.0461344	0.988978	-2.43481	0.00858365
Ghir_A10G023950	-0.856334	0.0330501	-2.00806	1.54266e-08
Ghir_A10G024040	-0.422146	0.363986	-2.71557	0.00174135
Ghir_A10G024190	1.16177	0.385234	2.19385	7.74722e-05
Ghir_A10G024200	2.74282	0.0245926	3.29721	0.00306749
Ghir_A10G024330	1.72376	0.288239	3.50602	0.000115332
Ghir_A10G024350	-0.856332	0.185108	-2.32227	5.02006e-09
Ghir_A10G024580	-1.24753	0.33521	-2.20855	0.00121442
Ghir_A10G024580.1	-1.27318	0.166979	-2.25484	1.45067e-06
Ghir_A11G000040.1	1.94343	0.211677	5.28217	1.33872e-06
Ghir_A11G000540	1.55655	0.289786	2.64832	2.72742e-05
Ghir_A11G000800	0.863948	0.566132	2.1404	0.000129271
Ghir_A11G000840	-1.40384	6.4317e-07	-3.0242	9.42522e-12
Ghir_A11G000920	-1.23669	0.0376591	-3.26222	0.00709621
Ghir_A11G000930	-1.03916	0.217635	-2.70311	0.00142503
Ghir_A11G001020	-1.63696	0.101325	-2.03164	0.00715496
Ghir_A11G001400	-1.98062	0.00188293	-3.32534	0.000374267
Ghir_A11G001700	-0.670816	0.0327145	-2.71651	3.65247e-09
Ghir_A11G001760	1.84299	0.0766487	3.00092	3.8415e-06
Ghir_A11G001800	-0.538455	0.728473	-2.44851	0.00059068
Ghir_A11G002860.1	-0.390726	0.841869	-3.05483	5.34164e-05
Ghir_A11G002920	-1.53806	3.08155e-05	-2.97112	6.0193e-20
Ghir_A11G003380	-1.40914	4.59079e-06	-2.02277	1.29345e-16
Ghir_A11G003460.1	-1.98545	0.000254724	-3.49065	7.88401e-30
Ghir_A11G003880	-1.85338	2.61315e-06	-4.63387	1.31942e-15
Ghir_A11G004140	-1.44479	0.0286272	-3.81966	0.0027723
Ghir_A11G004350	2.19692	0.0480194	2.62943	0.00316779
Ghir_A11G004480	-0.636462	0.439388	-2.76818	7.88042e-05
Ghir_A11G004490	-1.18568	0.126338	-2.87335	1.82255e-10
Ghir_A11G004630	1.67344	0.000392772	2.92179	8.94516e-21
Ghir_A11G004760	-0.497594	0.384798	-2.21573	4.30557e-05
Ghir_A11G005050	-1.26054	0.115017	-3.84697	4.7233e-09
Ghir_A11G005060	-1.36851	0.304501	-3.81023	1.72961e-09
Ghir_A11G005170	0.334215	0.886933	-2.08379	8.33457e-07
Ghir_A11G005180	-1.68229	0.00166979	-3.64375	2.08886e-70
Ghir_A11G005230	-1.91356	0.028732	-2.45616	6.83817e-05
Ghir_A11G005360	-1.18459	0.62504	-2.5647	0.000307203
Ghir_A11G005420	1.02969	0.449439	2.23594	0.000826718
Ghir_A11G005480	1.89244	0.142893	2.5829	0.00918523
Ghir_A11G005520.1	1.53689	0.137447	2.18654	0.00821676
Ghir_A11G005560	1.35212	0.47	3.17533	0.0009152
Ghir_A11G005830	-0.578054	0.886196	-6.9982	7.61611e-14
Ghir_A11G006850	2.24529	0.0890476	3.66059	0.000415337
Ghir_A11G007870	-1.38302	0.00271082	-3.37906	2.90054e-07
Ghir_A11G007930	1.95796	0.213521	3.36313	0.00450922
Ghir_A11G009230	-1.17453	0.00554549	-2.5122	2.39841e-14
Ghir_A11G009400	-1.24223	0.0451414	-2.32293	3.3249e-16
Ghir_A11G009400.1	-0.213492	0.925639	-3.00271	6.65725e-05
Ghir_A11G009710.1	-1.24074	0.0130863	-2.06688	9.00771e-33
Ghir_A11G009750	-0.87666	0.000942566	-2.00438	2.70449e-14
Ghir_A11G009810	1.86871	0.00668918	2.48234	4.63213e-07
Ghir_A11G009830	-0.745213	0.00695763	-2.33259	4.143e-06
Ghir_A11G009850.2	-1.78343	5.60889e-05	-4.37005	1.25441e-25
Ghir_A11G009900	1.62207	0.000419552	2.27413	4.41324e-12
Ghir_A11G009980	-1.01358	0.235343	-2.92499	5.24716e-09
Ghir_A11G010100	1.2337	0.339461	2.30888	0.00391417
Ghir_A11G010340	-1.31213	0.0663541	-2.86096	4.67208e-06
Ghir_A11G010680	-1.10455	0.0729516	-2.56851	2.34497e-06
Ghir_A11G010920	1.02752	0.684238	3.26285	0.00960096
Ghir_A11G010950	2.17924	0.0180352	3.0205	8.8649e-06
Ghir_A11G011510	-1.63538	0.221323	-4.35113	1.9088e-06
Ghir_A11G011800	-0.0707401	0.9732	-2.18228	3.67552e-07
Ghir_A11G011820	-0.984819	0.512487	-2.10456	2.04567e-05
Ghir_A11G011850	-1.06108	0.1661	-4.24573	6.83445e-11
Ghir_A11G011860	-1.54186	0.000466311	-2.92726	1.32377e-34
Ghir_A11G011910	1.91473	0.10795	3.57692	6.68381e-06
Ghir_A11G011940	-2.03431	0.0180154	-5.47964	2.85513e-13
Ghir_A11G012160	1.3869	0.302297	2.00193	0.00915687
Ghir_A11G012280.1	-1.37744	0.148925	-2.37302	0.000866768
Ghir_A11G012600	1.57439	0.375672	4.61984	7.01109e-05
Ghir_A11G013240	2.77765	0.0238142	3.36886	0.00613637
Ghir_A11G013310	-1.76058	6.1632e-05	-2.02455	2.98052e-06
Ghir_A11G013380	1.69712	0.30444	2.82553	0.00416783
Ghir_A11G013500	-1.35066	0.0322911	-2.34063	3.69006e-06
Ghir_A11G013570	1.54958	0.0164412	2.02319	1.26099e-05
Ghir_A11G013640	-1.04255	0.495961	-2.71849	0.00604694
Ghir_A11G013860	1.92858	0.00901038	2.46565	0.000381233
Ghir_A11G014110	0.0862261	0.966027	-3.04009	0.000137135
Ghir_A11G014330	-1.50008	0.0300988	-3.25133	3.55765e-07
Ghir_A11G014830	-0.941469	0.0541557	-3.2577	2.36113e-25
Ghir_A11G014830.2	0.00742142	0.99256	-2.12435	0.00779988
Ghir_A11G015840	-1.34079	0.000948542	-2.32992	3.89585e-10
Ghir_A11G016260	1.5832	0.383163	3.20823	0.00189065
Ghir_A11G016820	-1.34226	0.143591	-3.19099	6.05474e-05
Ghir_A11G016850	1.45003	0.414961	2.59088	0.00433055
Ghir_A11G016980	-1.1239	0.149246	-2.31121	3.26907e-28
Ghir_A11G017290	-0.00939473	0.99405	-2.00224	2.11747e-07
Ghir_A11G017410	-1.91985	0.0925916	-3.35076	1.77772e-12
Ghir_A11G017410.1	-1.56432	0.0475087	-2.96768	0.00559667
Ghir_A11G017430.1	-0.986973	0.192664	-2.12151	5.28826e-08
Ghir_A11G017460	-1.48082	0.137356	-3.26993	1.44895e-06
Ghir_A11G017470.1	-1.55396	0.0406263	-3.80096	3.07342e-11
Ghir_A11G017490	-0.886167	0.567664	-2.54417	0.00544823
Ghir_A11G017500	-1.11515	0.625837	-5.34999	3.71482e-11
Ghir_A11G017530	-1.52811	0.100359	-3.23878	2.498e-16
Ghir_A11G017530.1	-1.2567	0.0948027	-3.75036	5.85877e-16
Ghir_A11G017740	-1.48482	0.000392497	-2.83671	1.58668e-09
Ghir_A11G018000	1.80318	0.162312	2.94794	5.49938e-06
Ghir_A11G018370	1.69772	0.336889	4.14388	0.000121029
Ghir_A11G018500.1	-0.440121	0.802399	-3.71943	4.67528e-07
Ghir_A11G018690	1.77446	6.00266e-12	2.12484	1.39156e-13
Ghir_A11G019520.1	0.549604	0.842957	5.45697	5.38273e-08
Ghir_A11G019670.1	-2.01247	0.122276	-3.1069	0.00177176
Ghir_A11G021250	1.35088	0.48028	3.68238	0.00721458
Ghir_A11G021770	1.57169	0.401605	3.0584	0.00222805
Ghir_A11G021790	1.05602	0.63236	4.08016	0.00183586
Ghir_A11G021950	-1.11949	2.4707e-06	-2.6005	1.06068e-07
Ghir_A11G021960	-1.17451	0.216797	-2.85007	0.000695252
Ghir_A11G022060	-1.14061	0.410095	-3.55368	0.000187236
Ghir_A11G022400	1.71789	0.311264	3.2153	0.00268752
Ghir_A11G022630	-0.909651	0.117198	-2.03414	5.78772e-08
Ghir_A11G023020	1.82718	0.0019614	2.9101	3.70597e-10
Ghir_A11G023030	1.83106	0.121259	2.65851	0.0018918
Ghir_A11G023050	1.2353	0.37121	2.39733	0.000345054
Ghir_A11G023140	-1.35626	0.00391721	-2.08491	1.53844e-12
Ghir_A11G023230	-2.35341	0.0112672	-3.19479	0.00180032
Ghir_A11G023430	-1.1672	0.00936621	-2.95338	1.07058e-09
Ghir_A11G023840	1.10386	0.658758	3.34033	0.00573732
Ghir_A11G024130	1.6976	0.0676922	2.54421	1.25352e-08
Ghir_A11G024160	-0.840838	0.0789961	-2.42405	0.00016542
Ghir_A11G024820	1.40392	0.0683328	2.01783	2.73049e-05
Ghir_A11G025030.2	1.45417	0.43228	3.72769	0.00520684
Ghir_A11G025350	-1.36085	0.137884	-4.93615	4.28149e-27
Ghir_A11G025350.3	-0.492971	0.819436	-3.13231	1.00556e-12
Ghir_A11G025870	-0.491287	0.724669	-2.35228	8.90952e-07
Ghir_A11G026000.1	-1.51259	0.0525845	-2.91945	2.43828e-10
Ghir_A11G026070.1	1.25945	0.0694782	2.30326	1.95558e-07
Ghir_A11G026480	1.81007	0.000137145	2.99707	1.49382e-37
Ghir_A11G027070.1	2.15085	0.0662596	2.98374	0.002561
Ghir_A11G027170			3.63978	0.00914481
Ghir_A11G027380.1	-1.7185	0.162493	-2.25981	0.00787506
Ghir_A11G027550	-1.72494	3.15752e-08	-2.49638	2.30459e-20
Ghir_A11G027900	1.832	0.00162757	2.96562	9.5164e-13
Ghir_A11G028490	1.67254	0.0637153	2.1974	8.34276e-08
Ghir_A11G028550	-1.97322	0.000138109	-3.12711	2.95259e-13
Ghir_A11G028620	-1.29114	0.00306131	-3.4246	3.80224e-06
Ghir_A11G029090	-1.62049	2.83514e-06	-3.49265	6.20672e-26
Ghir_A11G029670.3	1.04708	0.628109	6.01496	6.16073e-09
Ghir_A11G029700	1.03178	0.70965	3.95869	9.02936e-05
Ghir_A11G029870	1.60266	0.12631	2.30586	0.000779778
Ghir_A11G030090	-1.94675	0.00367505	-3.06051	1.60452e-12
Ghir_A11G030630	-0.968017	0.287889	-2.16755	3.18161e-07
Ghir_A11G030770	-0.504935	0.837334	-2.65856	0.000956313
Ghir_A11G030770.1	-1.59265	0.00086181	-2.39858	9.12006e-09
Ghir_A11G030900.1	-0.589449	0.535139	-2.06323	7.60537e-09
Ghir_A11G030940.2	-1.08308	0.0172961	-2.2034	6.65612e-11
Ghir_A11G030960	-0.326857	0.903694	-2.31804	0.00587181
Ghir_A11G031030	-0.933335	0.717349	-2.64351	0.00029057
Ghir_A11G031700.1	-0.946719	0.300566	-2.03133	1.81481e-05
Ghir_A11G031940.1	-1.14138	0.189644	-3.60182	1.72184e-12
Ghir_A11G032330	-1.20469	0.205807	-3.04725	0.00034698
Ghir_A11G032370	-1.34304	0.0345896	-3.35431	3.86163e-16
Ghir_A11G032370.1	-1.56792	0.0170417	-2.49544	9.11487e-08
Ghir_A11G032500.1	-1.23028	0.289005	-2.19505	0.00017648
Ghir_A11G032640	1.34649	0.396769	2.44616	0.00499884
Ghir_A11G032710	-0.894154	0.254536	-4.26836	2.10128e-14
Ghir_A11G032790.1	-1.01883	0.177414	-2.20784	0.00354736
Ghir_A11G032840	-1.76512	0.159898	-3.14147	0.000675184
Ghir_A11G033500	2.15842	0.0244404	3.14735	9.04427e-09
Ghir_A11G034330.1	1.33247	0.327632	2.2863	0.00165964
Ghir_A11G034340	1.45434	0.138314	2.35586	0.000808955
Ghir_A11G034610	1.42841	0.37337	2.34975	0.0034998
Ghir_A11G034800.1	-0.803665	0.282817	-2.69163	0.0037021
Ghir_A11G035050	-1.26066	0.0484534	-2.37769	1.24305e-07
Ghir_A11G035300	1.09177	0.677666	4.06223	1.94369e-05
Ghir_A11G035410	-1.48972	0.0326781	-2.90669	5.05526e-18
Ghir_A11G035810	1.94451	0.221388	4.01857	0.000233161
Ghir_A11G035980.1	1.71948	0.00842746	2.41193	3.45381e-07
Ghir_A12G000030.1	0.668164	0.706999	3.66215	8.42618e-06
Ghir_A12G000850	1.12965	0.331303	2.04535	0.00108123
Ghir_A12G001210	1.54036	0.421002	3.39568	0.00258893
Ghir_A12G001260	-0.336429	0.935191	-3.20096	0.000276714
Ghir_A12G001360	-1.50984	0.00569144	-2.93	6.27159e-21
Ghir_A12G001370	-1.13559	0.146115	-2.74675	9.00871e-12
Ghir_A12G001540	1.82004	0.00534855	2.07706	4.57611e-05
Ghir_A12G001990	-0.984548	0.490878	-3.39688	5.3687e-06
Ghir_A12G002010	-1.50947	1.81947e-07	-2.93662	7.05352e-15
Ghir_A12G002030	-1.43559	0.0817639	-3.84374	5.50235e-23
Ghir_A12G002190	0.850348	0.732872	4.08056	0.000123495
Ghir_A12G002870.1	1.01223	0.390305	2.65493	6.03984e-06
Ghir_A12G002900.1	-0.439916	0.782077	-2.66998	3.5532e-07
Ghir_A12G003860	-1.28686	0.0235724	-3.37051	1.37834e-07
Ghir_A12G003980	-0.784651	0.0732372	-2.13481	2.90553e-07
Ghir_A12G004180	1.44723	0.0519154	2.7146	1.51e-11
Ghir_A12G004180.1	2.61522	0.0110491	4.40519	8.66756e-09
Ghir_A12G004320.1	-1.81193	0.0510905	-2.31697	7.27606e-09
Ghir_A12G004660	-0.920423	0.743548	-4.33767	0.00038586
Ghir_A12G004660.1	0.649891	0.804402	4.8512	2.38217e-05
Ghir_A12G005080.1	-1.3863	0.0430315	-2.28731	2.09176e-08
Ghir_A12G005090	-0.979727	0.319513	-2.60215	8.08748e-06
Ghir_A12G005100	0.0625955	0.983683	-2.57575	3.00816e-06
Ghir_A12G005140	-0.816643	0.0286675	-2.19321	5.59893e-07
Ghir_A12G005170	-1.70918	0.0419064	-2.74905	6.83174e-10
Ghir_A12G005460	-1.37814	0.149793	-2.03879	0.000317441
Ghir_A12G005460.1	-1.30011	0.211677	-3.32863	3.35061e-16
Ghir_A12G005510	-1.01416	0.0157913	-2.05408	1.20699e-07
Ghir_A12G005560	-0.321371	0.774007	-2.8402	3.02863e-05
Ghir_A12G005780	-1.20946	0.102724	-3.26547	8.64942e-13
Ghir_A12G006150	-2.2298	0.088501	-4.06469	0.00136266
Ghir_A12G006890	-1.74133	0.0807792	-2.48932	0.000714571
Ghir_A12G007610.1	-1.49418	0.0134942	-2.40413	1.62669e-11
Ghir_A12G008380.3	-1.65343	3.82624e-09	-2.1407	4.96294e-21
Ghir_A12G008540	-0.315024	0.738559	-2.16809	0.000887481
Ghir_A12G008860	1.57919	0.256897	2.47512	0.00120631
Ghir_A12G008990	2.07222	0.0241537	2.69128	1.40818e-05
Ghir_A12G009780	1.74886	0.311295	3.1604	0.00738844
Ghir_A12G009910	1.40638	0.0286675	2.55618	2.40216e-07
Ghir_A12G010000	1.26648	0.438108	2.05334	0.00486444
Ghir_A12G010520.1	1.69411	0.0709109	2.18481	5.33743e-05
Ghir_A12G010530	-1.95576	0.00126296	-3.85226	1.09432e-05
Ghir_A12G010790	-0.724999	0.448202	-2.59764	0.00920964
Ghir_A12G010840.2	-0.162023	0.944011	-2.96182	0.000247089
Ghir_A12G010870	1.91257	0.017189	2.25482	8.75077e-06
Ghir_A12G011170.7	-0.942325	0.73511	-4.22766	0.000712039
Ghir_A12G011250	2.29438	0.0209212	2.38	0.00231919
Ghir_A12G011290	-1.23639	0.182514	-2.73739	0.00385073
Ghir_A12G011650	-0.889108	0.0227287	-2.08095	6.50449e-08
Ghir_A12G011680	1.89019	3.28368e-05	2.08885	1.0211e-12
Ghir_A12G012150	0.937613	0.511651	2.3667	0.00269518
Ghir_A12G012850	1.52762	0.248134	2.42906	0.00801897
Ghir_A12G013140	-0.571992	0.0148786	-2.85849	1.82928e-07
Ghir_A12G013590	-0.28575	0.914469	-2.81156	0.00173255
Ghir_A12G014290	1.72141	0.235055	2.57191	0.000626764
Ghir_A12G014570.5	-0.861857	0.682724	-3.76039	0.00150713
Ghir_A12G014650	-1.43496	0.00540894	-3.56808	0.00180446
Ghir_A12G014650.1	-0.783198	0.230973	-2.56685	0.000307455
Ghir_A12G014700	1.36652	0.503759	3.30943	0.00924606
Ghir_A12G014840	1.70698	0.00266432	2.79385	3.66173e-06
Ghir_A12G014850	-1.71139	6.4317e-07	-2.07029	7.56203e-15
Ghir_A12G014930	1.47172	0.461765	2.8113	0.00405232
Ghir_A12G015300	-1.25391	0.296232	-2.8162	2.89992e-06
Ghir_A12G015310	1.74855	0.226926	2.66101	0.0021653
Ghir_A12G015330	-1.47978	2.68883e-07	-2.67815	6.08957e-16
Ghir_A12G015580	-1.25265	0.040709	-3.56742	3.21079e-05
Ghir_A12G015580.3	-1.47515	0.414352	-5.91906	1.55483e-17
Ghir_A12G015980	1.50469	0.131622	2.27428	0.000161076
Ghir_A12G016020	1.14517	0.0186996	2.01988	4.48555e-09
Ghir_A12G016260	2.2229	0.0235585	2.75961	0.000264647
Ghir_A12G016300	1.06928	0.211085	2.03981	7.2712e-05
Ghir_A12G016440	-1.59212	0.00117337	-4.15142	3.85321e-22
Ghir_A12G016770.4	1.07754	0.166275	2.12672	1.94023e-11
Ghir_A12G017120	-1.44203	0.41347	-2.03607	0.00691433
Ghir_A12G017130	-1.07987	0.25931	-3.53635	2.80768e-16
Ghir_A12G017470	2.07239	0.0784674	2.7075	1.63309e-05
Ghir_A12G017840	-1.2455	0.0849671	-4.42814	2.65196e-07
Ghir_A12G017860	-0.91438	0.446126	-2.2238	0.00638228
Ghir_A12G017890	1.11851	0.083451	2.13607	9.71744e-08
Ghir_A12G018190	1.16196	0.532827	2.27614	0.00435793
Ghir_A12G018230	1.79573	0.288905	3.78088	0.000473262
Ghir_A12G018320	-1.52398	0.0188863	-3.58108	2.7879e-27
Ghir_A12G018510.1	1.80035	0.149793	2.80116	0.00160025
Ghir_A12G018540	0.912029	0.759023	2.45253	0.000990022
Ghir_A12G018640	1.77327	0.280179	4.58946	0.00011004
Ghir_A12G018650.1	-1.21837	0.0859333	-2.78091	2.3288e-11
Ghir_A12G018860	-1.02264	0.077597	-2.68948	4.57555e-13
Ghir_A12G018860.3	-1.74662	0.00271883	-6.5021	1.02618e-20
Ghir_A12G018870	-2.09479	0.0147948	-5.27854	2.59751e-32
Ghir_A12G018930.1	1.21059	0.555717	2.72673	0.0053302
Ghir_A12G019040	1.50693	0.234603	2.39149	0.000531888
Ghir_A12G019160	-0.492577	0.582518	-3.00653	2.52479e-08
Ghir_A12G019160.2	-1.44395	5.79798e-05	-3.07844	1.61145e-51
Ghir_A12G019630	1.43377	0.459011	2.98242	0.0087311
Ghir_A12G019870	1.83099	0.110646	3.62929	8.70369e-12
Ghir_A12G019920.1	2.29502	0.0809034	3.3446	0.00221625
Ghir_A12G020510	1.62528	0.302743	2.56336	0.00174207
Ghir_A12G020940	1.56337	0.110004	2.46743	3.5073e-06
Ghir_A12G021150.6	-1.99674	0.000251777	-2.63181	1.80409e-05
Ghir_A12G021340	1.82611	0.224834	2.87178	0.00794196
Ghir_A12G021380	-1.35715	0.0163296	-4.85015	2.52494e-09
Ghir_A12G021550	-1.56184	0.000154369	-2.28373	3.11238e-09
Ghir_A12G021660	-1.10913	0.0186996	-2.93361	1.33625e-05
Ghir_A12G021700	1.4311	0.19155	2.12428	0.000737928
Ghir_A12G021740	-0.943231	0.719444	-3.7677	1.56394e-09
Ghir_A12G021840	-0.667756	0.53343	-2.98301	0.000197551
Ghir_A12G021920	-1.35268	0.252923	-2.42131	2.79799e-10
Ghir_A12G022080	-0.340451	0.757979	-2.46266	1.02187e-10
Ghir_A12G022270	1.83282	0.254341	2.8327	0.00659682
Ghir_A12G022450	-1.9446	1.69738e-09	-2.10136	6.56955e-07
Ghir_A12G022470	-0.884934	0.642947	-4.2285	1.6753e-06
Ghir_A12G022530	-1.05482	0.173407	-2.02958	1.17306e-05
Ghir_A12G022580	-0.739293	0.158463	-2.46071	3.88252e-10
Ghir_A12G022770	1.49649	0.411506	3.77699	0.00421594
Ghir_A12G022820	1.45469	0.0404059	2.35639	3.35157e-08
Ghir_A12G022990	-1.59427	0.0900229	-2.78584	2.15254e-06
Ghir_A12G023030	-1.63188	0.000811071	-4.68866	1.24173e-05
Ghir_A12G023110	-1.77791	0.142925	-2.53982	0.00669565
Ghir_A12G023150	1.05216	0.63553	3.75448	0.00446673
Ghir_A12G023220	1.70804	0.265969	2.97239	0.0026304
Ghir_A12G023280	-1.97867	4.44669e-05	-2.7335	5.47311e-05
Ghir_A12G023330.1	-0.192383	0.944011	3.83172	0.000360885
Ghir_A12G023340	1.32922	0.484563	2.66069	0.00121755
Ghir_A12G023430.1	-1.04433	0.00562291	-2.14563	2.23341e-18
Ghir_A12G023650	-0.964914	0.268971	-2.16313	0.000178419
Ghir_A12G023660	-1.03184	0.338452	-2.31214	0.00771054
Ghir_A12G023820	-1.412	0.0170413	-3.54403	0.0089302
Ghir_A12G024300	-0.945274	0.0830176	-2.69873	3.49608e-27
Ghir_A12G024560.1	-0.429188	0.896299	-2.71632	3.56743e-06
Ghir_A12G024570	-1.29783	0.260371	-2.56282	0.000411998
Ghir_A12G024600.1	-0.666455	0.685234	-2.82138	9.17958e-08
Ghir_A12G024820	-0.201258	0.934836	-2.81639	0.00098123
Ghir_A12G024890	1.22865	0.511248	2.43042	0.00135471
Ghir_A12G025080	-0.911379	0.0617343	-2.32874	5.05676e-06
Ghir_A12G025490	-0.85614	0.538897	-3.6579	5.67201e-10
Ghir_A12G025550	-1.52325	0.0348768	-2.19989	6.45646e-06
Ghir_A12G025550.1	-1.06841	0.59921	-6.0534	1.14537e-08
Ghir_A12G025630	-0.692186	0.380446	-2.50513	2.93853e-07
Ghir_A12G025640	-1.22433	0.0188807	-2.80412	3.37786e-17
Ghir_A12G025720.1	1.28151	0.315632	2.37196	6.62677e-06
Ghir_A12G025840	1.72973	0.0991814	2.37653	0.00139189
Ghir_A12G025990	1.44325	0.383163	2.81747	0.00101604
Ghir_A12G026140	1.97967	0.193475	3.8874	0.0001726
Ghir_A12G026510	-1.65624	6.01434e-05	-3.20163	2.78936e-21
Ghir_A12G026790	-0.778047	0.259748	-2.68075	2.70234e-05
Ghir_A12G026900	-1.08855	0.0472584	-2.00946	2.77927e-12
Ghir_A12G027420	-0.297019	0.706747	-2.75581	0.00276797
Ghir_A12G027540	2.32287	0.0260462	3.59244	0.000121029
Ghir_A12G027760	1.45775	0.290377	2.07919	0.00297126
Ghir_A12G027850.1	-1.57847	0.298931	-2.26366	3.49971e-05
Ghir_A12G027910	-1.47844	0.0808998	-2.80497	2.64122e-05
Ghir_A12G027990	-1.70376	0.132659	-2.54759	0.00166106
Ghir_A12G028090.1	-0.0378786	0.99256	-6.69075	6.45192e-12
Ghir_A12G028180	-0.968105	0.361941	-2.0764	0.000993894
Ghir_A12G028190	-0.78163	0.563144	-2.81783	0.000329966
Ghir_A12G028230.1	0.333187	0.944011	3.2926	0.000211492
Ghir_A12G028240.1	-0.902659	0.0227771	-2.35704	6.34203e-18
Ghir_A12G028400	-0.794418	0.67264	-3.27903	0.000859223
Ghir_A12G028560	0.942323	0.477486	2.60529	1.81153e-05
Ghir_A12G029020	2.0029	0.0255589	2.56566	0.00117443
Ghir_A12G029250.1	-1.79388	0.00992575	-2.16859	1.13553e-09
Ghir_A13G000270	-0.912686	0.561717	-3.02613	4.95919e-08
Ghir_A13G000300	-0.926224	0.0228298	-2.25987	5.46135e-18
Ghir_A13G000450	0.987406	0.441301	2.39102	4.90813e-06
Ghir_A13G000500	-1.59405	0.356916	-3.57628	0.00858202
Ghir_A13G000530	-0.541508	0.608317	-2.70204	0.00266121
Ghir_A13G000740	-1.34372	0.147223	-2.9391	2.31132e-07
Ghir_A13G000740.1	-1.76887	0.232458	-5.0703	2.67201e-08
Ghir_A13G000750	1.14567	0.476086	2.17836	0.000759369
Ghir_A13G000920.1	1.99514	0.0910125	2.95882	0.00161834
Ghir_A13G000930	-1.27986	0.00055142	-2.25082	1.52707e-15
Ghir_A13G001070.3	2.0838	0.165385	3.69424	0.00607049
Ghir_A13G001290	0.344429	0.944011	3.48507	0.000845907
Ghir_A13G001330	1.58223	0.121985	3.4835	1.19596e-09
Ghir_A13G001400	-0.387047	0.594854	-2.46896	0.00622184
Ghir_A13G001680.1	1.47454	0.00672105	2.09463	0.000603659
Ghir_A13G001800	2.12312	0.130541	3.64029	1.79945e-05
Ghir_A13G002150	1.04001	0.696436	4.35239	0.000183205
Ghir_A13G002250	-0.30643	0.920693	-2.99501	0.000345475
Ghir_A13G002690	-1.50077	1.27747e-05	-3.04205	9.55839e-21
Ghir_A13G002690.1	0.311987	0.896299	-3.49087	2.60284e-09
Ghir_A13G002730.1	0.974727	0.406893	3.20824	3.87356e-12
Ghir_A13G002770	-0.673784	0.0018444	-2.09271	2.8841e-05
Ghir_A13G003200	1.75787	0.00047809	2.86929	3.43316e-13
Ghir_A13G003670	-1.55327	0.00548953	-2.12173	9.43383e-11
Ghir_A13G003670.1	-0.788553	0.374209	-2.68554	4.46536e-12
Ghir_A13G003850.1	-2.03931	0.171377	-3.91376	0.000120033
Ghir_A13G004090	-1.16379	0.456842	-2.2764	0.00626562
Ghir_A13G004110	1.58627	0.396947	2.88592	0.0042988
Ghir_A13G004280	-1.58924	8.00548e-06	-4.0468	0.000181597
Ghir_A13G004320	-1.62884	0.00312491	-3.29649	0.000739949
Ghir_A13G004330	-0.88619	0.110045	-3.03442	3.60126e-18
Ghir_A13G004510.1	-1.42063	0.013906	-2.48229	2.90054e-07
Ghir_A13G004840.1	-1.09282	0.0841651	-2.52999	7.03573e-07
Ghir_A13G005500	-1.09039	0.39401	-2.00624	0.00705845
Ghir_A13G005740	-1.15769	0.0823473	-2.57077	3.30361e-07
Ghir_A13G005950.1	-1.1755	0.28262	-3.39983	2.08307e-11
Ghir_A13G006540	-0.989743	0.27142	-2.16041	3.398e-10
Ghir_A13G006550	-1.76082	1.04916e-06	-3.17922	6.31415e-16
Ghir_A13G006610	-1.15866	0.259252	-3.36515	7.33961e-08
Ghir_A13G006610.1	-1.33669	0.158216	-2.42522	1.17615e-08
Ghir_A13G006620	-1.34633	0.185342	-3.61815	1.09721e-13
Ghir_A13G007260	1.15596	0.574304	5.05218	7.11553e-06
Ghir_A13G007280	-1.47238	0.221538	-3.01758	2.0063e-08
Ghir_A13G007360	1.12655	0.0573555	2.21573	1.11213e-23
Ghir_A13G007400	1.29697	0.00442434	2.29678	1.58433e-08
Ghir_A13G007410.1	1.16732	0.0013602	2.11355	1.75265e-08
Ghir_A13G007440	1.08496	0.574131	3.10885	1.09279e-06
Ghir_A13G007580	1.79317	0.111002	2.52074	3.7727e-07
Ghir_A13G007620	1.45888	0.328693	2.69997	0.000846553
Ghir_A13G007850	-1.92372	0.000656913	-3.23403	2.18045e-06
Ghir_A13G008950	1.18444	0.604731	5.20407	8.34395e-14
Ghir_A13G008960	1.33967	0.278613	3.58047	9.57091e-07
Ghir_A13G008990.1	-0.95111	0.0522645	-3.92129	2.25574e-24
Ghir_A13G009010	-1.50175	0.00327546	-2.50395	3.716e-23
Ghir_A13G009010.1	-0.306838	0.735302	-2.08265	6.04936e-08
Ghir_A13G009050	-0.561954	0.41186	-2.58474	2.93139e-06
Ghir_A13G010460	-1.6356	0.0492062	-2.13294	3.32424e-06
Ghir_A13G010640	1.77978	0.00393899	2.30329	2.36396e-08
Ghir_A13G010650	-0.413789	0.778232	-2.24931	4.25821e-05
Ghir_A13G011020	-0.32738	0.75403	-2.58603	9.71967e-06
Ghir_A13G011340	-1.03084	0.242497	-2.35141	3.28491e-09
Ghir_A13G011810	0.384939	0.874896	-2.30677	0.00366319
Ghir_A13G011840	1.31661	0.182147	2.13895	0.000335138
Ghir_A13G011920.3	1.10371	0.616093	2.42429	0.00699021
Ghir_A13G012430			4.05943	0.00235505
Ghir_A13G012460	2.35739	0.0101846	3.84425	3.28378e-06
Ghir_A13G012510	2.11366	0.140132	2.97647	0.0075407
Ghir_A13G012530	1.46306	0.445484	4.01469	3.89814e-05
Ghir_A13G012600	-0.844632	0.470894	-2.47229	2.08295e-06
Ghir_A13G012770	0.388325	0.944011	2.55252	0.00895358
Ghir_A13G012820	1.34188	0.186296	2.92608	2.83978e-08
Ghir_A13G013410.1	-0.833412	0.0279639	-4.04176	3.56343e-09
Ghir_A13G013500	-0.381443	0.846067	-2.1871	2.16305e-05
Ghir_A13G013840	1.64491	0.015668	2.0542	2.48109e-06
Ghir_A13G013870	1.37336	0.512819	2.91893	0.00366319
Ghir_A13G013950	1.41711	0.47341	3.5051	0.00418271
Ghir_A13G014170	0.622901	0.833612	4.18507	0.000368903
Ghir_A13G014410.1	-1.59637	0.0392805	-3.5915	2.49742e-11
Ghir_A13G014450	1.61307	0.350831	2.78523	0.00278608
Ghir_A13G014890	-1.127	0.405564	-3.14378	7.09799e-06
Ghir_A13G014970	-0.920103	0.0867549	-2.71398	8.37797e-05
Ghir_A13G015310	-0.387739	0.845507	-2.4923	4.97277e-07
Ghir_A13G015510	1.37296	0.00237558	2.01152	6.64575e-10
Ghir_A13G016010	1.27913	0.572636	4.13824	6.80303e-05
Ghir_A13G016250	-1.13303	0.356089	-2.06381	6.8111e-06
Ghir_A13G016380	-1.77609	0.173021	-3.15283	0.0038338
Ghir_A13G016390	-1.77162	0.11779	-4.34928	3.45282e-07
Ghir_A13G016530	-1.71146	4.77061e-05	-3.54296	7.855e-10
Ghir_A13G016540	-1.30388	0.116249	-2.91024	0.000943259
Ghir_A13G016590	1.81674	0.0810525	2.15073	0.00106986
Ghir_A13G016610	1.87979	0.110646	2.8243	0.000220484
Ghir_A13G016630	-0.418873	0.805284	-2.07825	0.00271648
Ghir_A13G017220	-1.64773	0.0134446	-4.74558	7.89854e-19
Ghir_A13G017410	-1.47153	0.0513562	-2.08622	0.00523713
Ghir_A13G018080	1.75598	0.00678774	2.34872	1.30075e-09
Ghir_A13G018660	-1.00758	0.0123257	-2.1369	3.95437e-06
Ghir_A13G018930	-1.26285	0.137497	-3.71366	1.45869e-06
Ghir_A13G018970	-0.0968979	0.944011	3.77814	0.00204152
Ghir_A13G019250	1.07846	0.478711	2.26721	5.67392e-07
Ghir_A13G019450	-1.9744	7.68826e-08	-3.38388	1.17838e-71
Ghir_A13G019530	1.45722	0.131668	2.41208	1.97978e-06
Ghir_A13G019540.1	1.42901	0.292022	2.17372	0.000176236
Ghir_A13G019570	1.33591	0.367437	2.27277	0.00199389
Ghir_A13G019750	-1.47748	0.115647	-2.0061	0.000261527
Ghir_A13G020030	-1.06471	0.109485	-2.39865	2.3602e-06
Ghir_A13G020340	-1.01015	0.0546764	-3.24081	1.70666e-13
Ghir_A13G020390	-1.82124	7.28651e-06	-2.22048	1.38449e-09
Ghir_A13G020390.1	-1.52057	0.0048904	-3.35487	3.16103e-11
Ghir_A13G020490.3	1.23396	0.412898	2.20642	0.00681078
Ghir_A13G020540.1	-2.38599	0.0746171	-4.87211	3.26916e-05
Ghir_A13G020980	-1.83741	0.000419233	-2.99517	5.0202e-12
Ghir_A13G021280	-1.14164	0.0141875	-2.53495	1.18303e-10
Ghir_A13G021450	-1.63709	0.136811	-2.67383	0.00541514
Ghir_A13G021630	-1.44222	0.000604502	-3.45101	5.13003e-09
Ghir_A13G021640	-1.72328	0.000656903	-4.14927	3.51379e-06
Ghir_A13G022010	1.6755	0.126805	2.21176	0.00664164
Ghir_A13G022340	0.769405	0.823949	3.38092	3.27978e-05
Ghir_A13G022800	1.40491	0.475105	3.65968	0.00115663
Ghir_A13G022910.1	-0.178192	0.928906	-2.29378	4.25487e-11
Ghir_A13G023470	-1.36517	0.00078424	-2.1415	2.48572e-09
Ghir_A13G023480	1.88543	0.201431	2.79038	0.00664354
Ghir_A13G024110	1.71213	0.317748	3.48752	0.00838804
Ghir_A13G024500	1.63078	0.284197	2.80098	0.00250328
Ghir_A13G024780	-1.21413	2.11382e-06	-2.02499	2.82247e-13
Ghir_D01G000180	-1.45497	0.146928	-3.62015	4.91081e-11
Ghir_D01G000510	2.15078	0.0389869	3.22074	1.51592e-05
Ghir_D01G000760	-0.710274	0.081181	-2.33879	2.49135e-13
Ghir_D01G000830	-1.37025	9.24185e-08	-2.04392	3.44361e-27
Ghir_D01G000930	-1.20608	0.036963	-2.04858	2.51671e-06
Ghir_D01G001010.1	-1.3941	0.00341895	-7.73795	2.2407e-35
Ghir_D01G001650	1.9559	0.0618056	4.04644	1.62496e-11
Ghir_D01G001720	1.51513	0.00660588	2.3381	1.76186e-06
Ghir_D01G001780	-1.27372	0.271189	-2.04327	0.00154283
Ghir_D01G001800	-0.020129	0.99256	-2.06047	0.0094498
Ghir_D01G001820	-0.940614	0.451369	-2.64337	3.54121e-08
Ghir_D01G001910	1.43212	0.47	3.37707	0.0060589
Ghir_D01G001940	-1.27191	0.110439	-3.65379	4.79338e-06
Ghir_D01G002000.1	-0.404484	0.880064	-2.99116	0.000142
Ghir_D01G002520	1.70935	0.314872	4.38846	0.000155389
Ghir_D01G002550	1.69762	0.142325	2.28672	0.00795095
Ghir_D01G003080	-1.6062	0.109788	-2.6325	0.00134006
Ghir_D01G003160	1.54848	0.414233	3.02043	0.00668684
Ghir_D01G003190	-0.95674	0.242497	-3.14436	5.41231e-26
Ghir_D01G003260	-1.48119	0.096244	-2.38195	3.58473e-06
Ghir_D01G003280.1	-0.793055	0.585803	-2.00778	4.85007e-06
Ghir_D01G003320	-1.39169	0.377806	-2.55472	0.0008008
Ghir_D01G003350	-0.501573	0.908886	-3.54786	0.00115134
Ghir_D01G003350.1	-1.67618	0.0187308	-2.89189	1.31964e-10
Ghir_D01G003360	-1.43043	0.0956692	-2.48539	1.87117e-09
Ghir_D01G003430	0.665946	0.656334	2.00721	9.64048e-07
Ghir_D01G003490	-1.62142	0.10508	-3.16258	0.000774367
Ghir_D01G003720	-1.05007	0.0717259	-2.63292	1.83129e-08
Ghir_D01G004140	-0.77428	0.0245122	-2.86301	6.37085e-08
Ghir_D01G004660	1.19684	0.572332	3.61873	0.00938316
Ghir_D01G004910	1.81637	0.0885324	2.56717	4.90195e-05
Ghir_D01G005660	-1.3281	1.28893e-10	-2.03093	1.27699e-16
Ghir_D01G005790	-1.15351	0.0395564	-2.2354	9.74276e-07
Ghir_D01G006040	-1.16295	0.325468	-2.24977	5.77203e-05
Ghir_D01G006270	1.40328	0.454255	2.98506	0.00949818
Ghir_D01G006500	-0.786314	0.11556	-2.6709	0.000181327
Ghir_D01G006510	-1.3321	0.0488095	-3.71544	9.47164e-14
Ghir_D01G006570	1.58979	0.307355	3.038	9.94674e-05
Ghir_D01G006680	-0.619098	0.208755	-2.96783	0.000555381
Ghir_D01G006740	1.84562	0.141343	2.43637	0.000161366
Ghir_D01G006860	-1.4865	0.000229722	-2.75952	5.84693e-07
Ghir_D01G006880	-0.401706	0.517379	-2.18462	2.13972e-05
Ghir_D01G007180	1.2859	0.0732372	2.4774	2.49087e-11
Ghir_D01G007400	-1.54259	8.94445e-05	-2.85022	1.17102e-30
Ghir_D01G007720.2	-0.100233	0.980798	-4.54173	0.000151129
Ghir_D01G007990	-0.922089	0.489185	-2.38839	0.000297402
Ghir_D01G008140	-1.21256	2.09644e-06	-3.07772	1.82865e-08
Ghir_D01G008440	1.6107	0.00145945	2.05977	1.41585e-06
Ghir_D01G008520	1.36808	0.410095	2.21878	0.00547537
Ghir_D01G008760	-1.33317	5.07824e-05	-2.34192	1.88483e-11
Ghir_D01G008840	1.78637	0.291999	4.01343	2.30134e-05
Ghir_D01G009130	1.65647	0.112977	2.70493	4.81701e-05
Ghir_D01G009140	1.83129	0.0624214	3.7434	2.76368e-12
Ghir_D01G009600	1.62127	0.345501	2.73247	0.00474898
Ghir_D01G009600.2	1.23692	0.537512	2.84072	0.00151763
Ghir_D01G009860.1	2.17175	0.133586	3.38538	0.00152116
Ghir_D01G010240	-0.797956	0.386562	-2.52187	2.11519e-11
Ghir_D01G010350	0.207591	0.944011	-2.20332	2.61196e-05
Ghir_D01G010590	-0.571721	0.226974	-2.52935	0.000401739
Ghir_D01G010730	1.86372	0.0992853	3.13059	0.000732726
Ghir_D01G010730.1	1.43107	0.466783	4.84882	5.47995e-06
Ghir_D01G010790	1.53348	0.307065	3.64378	1.4003e-05
Ghir_D01G010850	-0.473234	0.757991	-2.78273	0.00151548
Ghir_D01G010850.1	-1.12661	0.00025568	-3.10994	1.40785e-40
Ghir_D01G010890	-1.03923	0.0042437	-2.02537	2.29109e-14
Ghir_D01G011620	1.82637	0.245202	2.94574	0.0086232
Ghir_D01G011690	1.24575	0.295646	2.38164	2.69339e-05
Ghir_D01G011800	-1.6781	0.0124069	-2.81117	3.28334e-10
Ghir_D01G011800.1	-1.28432	0.225627	-2.56296	0.00661853
Ghir_D01G011930	1.11185	0.643237	2.49853	0.00360998
Ghir_D01G011960	1.61147	0.22298	2.30826	0.00120667
Ghir_D01G012620	-1.8344	1.21986e-10	-2.11862	3.76047e-35
Ghir_D01G012620.1	0.149252	0.944011	-4.75197	2.69789e-15
Ghir_D01G012670	-0.978751	0.278893	-2.0346	0.00343386
Ghir_D01G012710	-0.282557	0.92231	-2.57963	0.00104172
Ghir_D01G013350	-1.04875	0.34979	-3.26176	4.79024e-05
Ghir_D01G013390	-1.70153	0.0257206	-3.12594	9.16892e-13
Ghir_D01G013570	1.80979	0.146955	3.39651	2.79754e-07
Ghir_D01G013750.1	1.4907	0.318962	2.33175	0.00261678
Ghir_D01G014870	0.112521	0.967904	-2.15797	1.74295e-09
Ghir_D01G014940	-1.99732	0.000241267	-2.40984	4.01608e-13
Ghir_D01G015320	-0.182326	0.944011	-3.12908	0.00049153
Ghir_D01G015470.1	-0.879252	0.0235201	-3.30934	5.22826e-06
Ghir_D01G015540	2.24191	0.083451	3.54137	0.000249024
Ghir_D01G015600	-1.18435	0.065144	-3.58335	7.22897e-24
Ghir_D01G015820.1	1.0203	0.699757	3.59461	0.00155028
Ghir_D01G015990	-1.58888	0.0120659	-4.10728	6.59292e-09
Ghir_D01G016010	-1.14992	0.317182	-2.49817	1.35663e-05
Ghir_D01G016270	-0.496678	0.613032	-2.10132	1.76424e-05
Ghir_D01G016670	-0.987892	0.273677	-3.31346	2.57379e-16
Ghir_D01G016680	1.56661	0.283948	2.17301	0.00806127
Ghir_D01G017380	1.94705	0.138583	2.85691	0.00107529
Ghir_D01G017410	1.92707	0.219733	2.94083	0.00718985
Ghir_D01G018080.1	-0.530251	0.850063	-4.96412	1.33968e-06
Ghir_D01G018250	-1.201	0.00100613	-2.60236	3.5925e-08
Ghir_D01G018310	-1.01584	0.204942	-2.88726	2.51616e-13
Ghir_D01G018510	-0.645209	0.7198	-2.02518	9.45102e-05
Ghir_D01G018750	-1.08956	0.0881206	-3.18843	1.1619e-14
Ghir_D01G018890	-1.60435	0.00119049	-5.26168	7.53562e-74
Ghir_D01G018970	1.84853	0.00113855	2.17306	3.30526e-08
Ghir_D01G019480.1	1.8762	0.236766	4.29797	0.000477173
Ghir_D01G019610.1	-1.27862	0.110291	-3.3007	1.0818e-06
Ghir_D01G019730	-1.35974	0.0275023	-2.95754	6.57695e-10
Ghir_D01G020370.7	-0.722324	0.840261	-4.20471	0.00080724
Ghir_D01G020580.3	2.07149	0.11616	2.6511	0.00524235
Ghir_D01G020910	-0.985835	0.389252	-3.05377	3.398e-10
Ghir_D01G020920	-1.8991	0.0826012	-2.52848	0.000885784
Ghir_D01G021040	-1.2217	0.00171772	-2.89962	0.000316217
Ghir_D01G021170	0.0370183	0.991666	-2.43632	2.56994e-09
Ghir_D01G021240	-1.17893	0.259849	-2.18837	0.0001405
Ghir_D01G021300	1.52811	0.42206	3.35196	0.00569323
Ghir_D01G021520	-0.758916	0.0969993	-2.4677	7.44853e-11
Ghir_D01G021760	1.72041	0.232785	2.42667	0.00103699
Ghir_D01G021780	1.93724	0.144744	2.52263	0.00354143
[truncated: 1,560 more rows]
