# Supplementary material for: Transcriptome Analysis Reveals the Defense Mechanism of Cotton against Verticillium dahliae Induced by Hypovirulent Fungus Gibellulopsis nigrescens CEF08111
Source: Int J Mol Sci. 2023 Jan 12;24(2):1480. doi: 10.3390/ijms24021480 (PMC9863408; doi:10.3390/ijms24021480)
Supplement: Supplementary file 1 [file ijms-24-01480-s001.zip › Table S7.xlsx]

## Sheet: Venn GeneI
Gene ID	log2(Gn48/SW48)	Qvalue(SW48-vs-Gn48)	log2(Vd48/SW48)	Qvalue(SW48-vs-Vd48)
BGI_novel_G000682	3.09034	0.000694068	3.10671	0.0201806
BGI_novel_G002274	-3.36775	6.62977e-05	-0.499461	0.917593
BGI_novel_G002766	-2.86256	0.00341162	-1.02511	0.731826
BGI_novel_G005236	2.94286	0.00207516	2.28068	0.156058
BGI_novel_G005412	-3.19798	0.000365987	-1.29959	0.519314
BGI_novel_G005529	3.40047	5.41372e-05	2.71616	0.0644581
BGI_novel_G005896	2.83821	0.00435199
BGI_novel_G005976	-3.08267	0.000793613	-1.00153	0.69317
BGI_novel_G007054	2.76209	0.00253823	0.654804	0.879367
Ghir_A02G004000	2.435	0.000565716	1.58686	0.01129
Ghir_A04G011040.2	4.13029	1.01692e-08	0.97095	0.695987
Ghir_A05G000640	2.35014	3.96341e-06	1.1548	0.119269
Ghir_A05G008570.2	-4.01351	1.01692e-08	-0.460894	0.945546
Ghir_A05G023870	2.90448	0.00102558	0.451217	0.947328
Ghir_A07G020700	2.29945	1.07467e-06	1.75529	1.00368e-05
Ghir_A09G013360.8	3.11337	0.000570535	2.357	0.13521
Ghir_A11G002610	2.04719	5.16886e-28	0.900623	0.115901
Ghir_A11G027430	-3.24777	0.000237258	0.04794	0.994329
Ghir_D01G003870	-2.68066	0.00618286	0.109094	0.973683
Ghir_D01G018000	2.70251	0.000270511	1.33745	0.147367
Ghir_D02G007380	4.51347	1.36552e-11	2.86584	0.0445388
Ghir_D02G010110	-2.51923	0.0010021	-1.19545	0.188572
Ghir_D03G005180	3.06171	2.60266e-06	1.74653	0.1033
Ghir_D04G001520	2.42938	1.8564e-06	0.841722	0.533607
Ghir_D04G006540.2	6.33694	6.42523e-31	1.0445	0.660033
Ghir_D05G019090	-3.26062	0.000179802	-1.65773	0.379682
Ghir_D06G004080.2	3.14426	0.000531868	0.806354	0.767428
Ghir_D07G022500.1	3.03405	0.00113221	2.43953	0.115622
Ghir_D08G012030.1	-2.24459	0.00359673	-1.73262	0.0976922
Ghir_D09G015480.1	3.96919	5.23707e-08	2.63753	0.076296
Ghir_D11G002600	2.39725	1.4151e-11	0.744186	0.417025
Ghir_D11G004750	2.21041	0.00996961	0.373454	0.902834
Ghir_D13G024560	2.13218	0.00924322	1.6561	0.018972
