# Supplementary material for: Transcriptome Analysis Reveals the Defense Mechanism of Cotton against Verticillium dahliae Induced by Hypovirulent Fungus Gibellulopsis nigrescens CEF08111
Source: Int J Mol Sci. 2023 Jan 12;24(2):1480. doi: 10.3390/ijms24021480 (PMC9863408; doi:10.3390/ijms24021480)
Supplement: Supplementary file 1 [file ijms-24-01480-s001.zip › Table S8.xlsx]

## Sheet: Sheet1
Query ID	Subject ID	Identity	Align Length	Mismatch	Gap	Query Start	Query End	Subject Start	Subject End	Evalue	Score	Name	Type	Species	Domain Class	GeneBank ID	GeneBank Locus	Description
Ghir_A06G002810	PRGDB00149440	71.3	94	27	0	881	1162	850	943	1.2e-29	131	clementine0.9_001644m	Putative_R-Genes,_predicted_from_Pythozome	Citrus clementina	N			ABC2 homolog 6 (best arabidopsis hit)
Ghir_A06G002810.1	PRGDB00149440	27.7	195	131	5	340	921	648	833	3.7e-12	74.7	clementine0.9_001644m	Putative_R-Genes,_predicted_from_Pythozome	Citrus clementina	N			ABC2 homolog 6 (best arabidopsis hit)
Ghir_A05G040620	PRGDB00149144	89.6	77	8	0	3528	3298	470	546	1.7e-35	152.1	evm.model.supercontig_12.135	Putative_R-Genes,_predicted_from_Pythozome	Arabidopsis lyrata subsp. lyrata	N			ABC-2 type transporter family protein (best arabidopsis hit)
Ghir_A11G005360	PRGDB00176495	71.3	715	193	5	137	2254	22	733	2.9e-288	990.7	29805.m001528	Putative_R-Genes,_predicted_from_Pythozome	Oryza barthii	N			ABC-2 type transporter family protein (best arabidopsis hit)
Ghir_D11G036020	PRGDB00176495	71.3	715	193	5	137	2254	22	733	2.9e-288	990.7	29805.m001528	Putative_R-Genes,_predicted_from_Pythozome	Oryza barthii	N			ABC-2 type transporter family protein (best arabidopsis hit)
Ghir_A12G004660	PRGDB00178750	81.8	614	85	3	815	2575	129	742	1.8e-285	981.5	POPTR_0016s06620.1	Putative_R-Genes,_predicted_from_Pythozome	Populus trichocarpa	N			ABC-2 type transporter family protein (best arabidopsis hit)
Ghir_A12G004660.1	PRGDB00178750	80.4	739	143	2	281	2494	5	742	0	1166	POPTR_0016s06620.1	Putative_R-Genes,_predicted_from_Pythozome	Populus trichocarpa	N			ABC-2 type transporter family protein (best arabidopsis hit)
Ghir_A12G005100	PRGDB00178750	81.1	735	137	2	259	2460	9	742	0	1171.8	POPTR_0016s06620.1	Putative_R-Genes,_predicted_from_Pythozome	Populus trichocarpa	N			ABC-2 type transporter family protein (best arabidopsis hit)
Ghir_A12G005510	PRGDB00178750	82.3	576	100	2	259	1983	9	583	5.8e-272	936.8	POPTR_0016s06620.1	Putative_R-Genes,_predicted_from_Pythozome	Populus trichocarpa	N			ABC-2 type transporter family protein (best arabidopsis hit)
Ghir_A05G036670	PRGDB00163060	79.6	735	143	3	193	2376	19	753	0	1135.9	cassava4.1_002248m	Putative_R-Genes,_predicted_from_Pythozome	Vitis aestivalis	N			ABC-2 type transporter family protein (best arabidopsis hit)
Ghir_A08G011860.1	PRGDB00163060	79.6	735	143	3	193	2376	19	753	0	1135.9	cassava4.1_002248m	Putative_R-Genes,_predicted_from_Pythozome	Vitis aestivalis	N			ABC-2 type transporter family protein (best arabidopsis hit)
Ghir_A08G011870	PRGDB00163060	77.1	756	163	5	506	2752	1	753	0	1125.9	cassava4.1_002248m	Putative_R-Genes,_predicted_from_Pythozome	Vitis aestivalis	N			ABC-2 type transporter family protein (best arabidopsis hit)
Ghir_A08G003170	PRGDB00161165	72.6	831	215	6	1412	3880	1	826	0	1189.5	cassava4.1_001747m	Putative_R-Genes,_predicted_from_Pythozome	Vitis aestivalis	RPW8-NL			ADR1-like 1 (best arabidopsis hit)
Ghir_D01G006040	PRGDB00184285	55	302	116	5	271	1122	995	1294	4e-89	328.2	AC195587.4_FGT004	Putative_R-Genes,_predicted_from_Pythozome	Zea mays	CNL			alpha/beta-Hydrolases superfamily protein (best arabidopsis hit); stripe rust resistance protein Yr10, putative, expressed (best rice hit)
BGI_novel_G004606	PRGDB00066523	56.8	95	39	1	371	649	1141	1235	1.4e-22	107.8	At.43039	Putative_R-Genes,_predicted_from_NCBI_UniGene	Arabidopsis thaliana	TNL	39104559	AK117122	Arabidopsis thaliana At5g40910 mRNA for putative disease resistance protein, complete cds, clone: RAFL16-65-P20
BGI_novel_G004582	PRGDB00065940	63.9	568	179	6	124	1794	4	556	2.7e-204	711.4	At.12809	Putative_R-Genes,_predicted_from_NCBI_UniGene	Arabidopsis thaliana	Mlo-like	186506569	NM_129478	Arabidopsis thaliana MLO12 (MILDEW RESISTANCE LOCUS O 12); calmodulin binding (MLO12) mRNA, complete cds
BGI_novel_G004880	PRGDB00067001	71	352	89	5	493	1527	1	346	4.3e-126	452.2	At.66955	Putative_R-Genes,_predicted_from_NCBI_UniGene	Arabidopsis thaliana	RPW8-NL	110737162	AK228620	Arabidopsis thaliana mRNA for ADR1, complete cds, clone: RAFL15-45-C23
BGI_novel_G004777	PRGDB00066564	43	107	60	1	610	927	1127	1233	6.3e-12	72.4	At.45170	Putative_R-Genes,_predicted_from_NCBI_UniGene	Arabidopsis thaliana	TNL	110741818	AK226752	Arabidopsis thaliana mRNA for putative disease resistance protein, complete cds, clone: RAFL07-75-G09
BGI_novel_G004605	PRGDB00065964	54.1	773	338	10	265	2562	34	796	5.3e-228	790.8	At.15940	Putative_R-Genes,_predicted_from_NCBI_UniGene	Arabidopsis thaliana	RLK	18408665	NM_105369	Arabidopsis thaliana protein kinase family protein
BGI_novel_G004543	PRGDB00065908	46.8	252	117	6	100	804	57	308	4.1e-61	235	At.8403	Putative_R-Genes,_predicted_from_NCBI_UniGene	Arabidopsis thaliana	RLK	1235679	U48698	Arabidopsis thaliana putative receptor serine
BGI_novel_G004363	PRGDB00065877	50.8	61	29	1	1257	1439	467	526	1.7e-11	70.9	At.3076	Putative_R-Genes,_predicted_from_NCBI_UniGene	Arabidopsis thaliana	TNL	186511686	NM_001125496	Arabidopsis thaliana WRKY19; transcription factor (WRKY19) mRNA, complete cds
Ghir_D01G021240	PRGDB00186672	37.6	85	48	1	1678	1439	682	766	2.1e-08	61.6		Putative_R-Genes,_collected_from_NCBI_Protein	Arachis hypogaea	NL	342365827	HQ637178	Arachis hypogaea clone AHF-205D04 NBS-LRR gene cluster, complete sequence.
Ghir_D01G021780	PRGDB00186676	59.4	229	31	3	2935	3579	939	1119	1.5e-57	225.3		Putative_R-Genes,_collected_from_NCBI_Protein	Arachis hypogaea	NL	342365827	HQ637178	Arachis hypogaea clone AHF-205D04 NBS-LRR gene cluster, complete sequence.
Ghir_A06G017440	PRGDB00150546	72.7	648	159	7	657	2579	26	662	1e-260	899.4	evm.model.supercontig_66.35	Putative_R-Genes,_predicted_from_Pythozome	Arabidopsis lyrata subsp. lyrata	N			ATP-binding casette family G25 (best arabidopsis hit)
Ghir_A10G017780	PRGDB00175198	74.8	659	155	5	273	2222	1	657	1.4e-279	961.8	POPTR_0003s03650.1	Putative_R-Genes,_predicted_from_Pythozome	Populus trichocarpa	N			ATP-binding cassette 14 (best arabidopsis hit)
BGI_novel_G001900	PRGDB00061522	46.3	41	22	0	1632	1754	21	61	0.0019	45.1	disease resistance protein	Putative_R-Genes,_collected_from_NCBI_Protein	Brassica rapa subsp. pekinensis	NL	227438216	FJ842817	Brassica rapa subsp. pekinensis isolate BrNL12 disease resistance protein gene, complete cds.
BGI_novel_G002225	PRGDB00061522	51.7	29	14	0	226	312	331	359	0.32	37.7	disease resistance protein	Putative_R-Genes,_collected_from_NCBI_Protein	Brassica rapa subsp. pekinensis	NL	227438216	FJ842817	Brassica rapa subsp. pekinensis isolate BrNL12 disease resistance protein gene, complete cds.
BGI_novel_G001891	PRGDB00061511	37.9	87	34	1	3219	3019	2325	2411	1.2e-06	55.8	disease resistance protein	Putative_R-Genes,_collected_from_NCBI_Protein	Brassica rapa subsp. pekinensis	TNL	227438238	FJ842828	Brassica rapa subsp. pekinensis isolate BrTNL10 disease resistance protein gene, complete cds.
BGI_novel_G002459	PRGDB00061532	59.4	32	13	0	1111	1206	1052	1083	6e-05	50.1	disease resistance protein	Putative_R-Genes,_collected_from_NCBI_Protein	Brassica rapa subsp. pekinensis	TNL	227438196	FJ842807	Brassica rapa subsp. pekinensis isolate BrTNL50 disease resistance protein gene, complete cds.
Ghir_A11G032370	PRGDB00177866	75.1	373	91	2	72	1187	240	611	6.3e-161	568.2	30153.m000744	Putative_R-Genes,_predicted_from_Pythozome	Oryza barthii	RLP			BRI1-associated receptor kinase (best arabidopsis hit)
Ghir_D01G000180	PRGDB00184089	53	202	95	0	619	14	581	782	1.1e-50	201.8	GSVIVT01029816001	Putative_R-Genes,_predicted_from_Pythozome	Vitis vinifera	RLP			BRI1-associated receptor kinase (best arabidopsis hit)
Ghir_A13G007580	PRGDB00183046	32.8	134	86	2	1395	1787	790	922	1.6e-12	75.1	GSVIVT01008201001	Putative_R-Genes,_predicted_from_Pythozome	Vitis vinifera	NL			calcium sensing receptor (best arabidopsis hit)
Ghir_A06G018280	PRGDB00150628	49.5	666	285	11	82	1995	24	666	7e-176	617.1	evm.model.supercontig_81.18	Putative_R-Genes,_predicted_from_Pythozome	Arabidopsis lyrata subsp. lyrata	RLK-GNK2			cysteine-rich RLK (RECEPTOR-like protein kinase) 11 (best arabidopsis hit)
Ghir_A07G021090	PRGDB00157082	55.3	653	271	6	104	2044	14	651	2.4e-204	711.8	orange1.1g006317m	Putative_R-Genes,_predicted_from_Pythozome	Citrus sinensis	RLK-GNK2			cysteine-rich RLK (RECEPTOR-like protein kinase) 14 (best arabidopsis hit)
Ghir_A09G011720.1	PRGDB00167386	48.5	33	17	0	1369	1467	352	384	42	29.6	AC235009_26.1	Putative_R-Genes,_predicted_from_Pythozome	Medicago truncatula	RLK-GNK2			cysteine-rich RLK (RECEPTOR-like protein kinase) 25 (best arabidopsis hit)
Ghir_A09G007650.1	PRGDB00166448	68.6	589	181	4	306	2069	23	608	2.7e-231	801.6	cassava4.1_003267m	Putative_R-Genes,_predicted_from_Pythozome	Vitis aestivalis	RLK-GNK2			cysteine-rich RLK (RECEPTOR-like protein kinase) 3 (best arabidopsis hit)
Ghir_A05G007320	PRGDB00144080	60.9	133	44	2	768	1166	97	221	1e-36	154.8	907240	Putative_R-Genes,_predicted_from_Pythozome	Arabidopsis lyrata	CNL			Disease resistance protein (CC-NBS-LRR class) family (best arabidopsis hit)
Ghir_A06G012870.1	PRGDB00150242	55.9	601	257	5	1123	2922	216	809	9e-191	667.2	clementine0.9_002579m	Putative_R-Genes,_predicted_from_Pythozome	Citrus clementina	CNL			Disease resistance protein (CC-NBS-LRR class) family (best arabidopsis hit)
Ghir_A07G004280	PRGDB00154044	54.3	35	16	0	2686	2790	751	785	0.023	41.2	orange1.1g002659m	Putative_R-Genes,_predicted_from_Pythozome	Citrus sinensis	CNL			Disease resistance protein (CC-NBS-LRR class) family (best arabidopsis hit)
Ghir_A07G004780	PRGDB00154053	47.4	889	443	12	354	2963	1	883	5.8e-217	754.2	orange1.1g002700m	Putative_R-Genes,_predicted_from_Pythozome	Citrus sinensis	CNL			Disease resistance protein (CC-NBS-LRR class) family (best arabidopsis hit)
Ghir_A07G012500.1	PRGDB00155652	57.8	883	351	6	76	2679	34	909	9.6e-285	979.2	Glyma01g37620.1	Putative_R-Genes,_predicted_from_Pythozome	Glycine max	CNL			Disease resistance protein (CC-NBS-LRR class) family (best arabidopsis hit)
Ghir_A11G030960	PRGDB00177748	39.5	352	184	8	2689	3726	1	329	2.2e-54	214.9	30143.m001203	Putative_R-Genes,_predicted_from_Pythozome	Oryza barthii	CNL			Disease resistance protein (CC-NBS-LRR class) family (best arabidopsis hit)
Ghir_A08G002600	PRGDB00160871	49.7	519	236	9	1	1500	1	513	5.5e-134	477.6	cassava4.1_001427m	Putative_R-Genes,_predicted_from_Pythozome	Vitis aestivalis	CNL			Disease resistance protein (CC-NBS-LRR class) family (best arabidopsis hit)
Ghir_D01G008760	PRGDB00184318	63	54	20	0	409	248	811	864	8.1e-09	62.4	GSVIVT01034429001	Putative_R-Genes,_predicted_from_Pythozome	Vitis vinifera	CNL			Disease resistance protein (CC-NBS-LRR class) family (best arabidopsis hit)
Ghir_A07G023100	PRGDB00158499	62.8	43	16	0	2358	2486	138	180	1.1e-06	55.5	Glyma06g19410.1	Putative_R-Genes,_predicted_from_Pythozome	Glycine max	TNL			disease resistance protein (TIR-NBS class), putative (best arabidopsis hit)
Ghir_A05G003220	PRGDB00143781	80	35	7	0	896	1000	169	203	7.7e-09	62	356572	Putative_R-Genes,_predicted_from_Pythozome	Arabidopsis lyrata	T			Disease resistance protein (TIR-NBS-LRR class) family (best arabidopsis hit)
Ghir_A05G003620	PRGDB00143781	80	35	7	0	1072	1176	169	203	8.6e-09	62	356572	Putative_R-Genes,_predicted_from_Pythozome	Arabidopsis lyrata	T			Disease resistance protein (TIR-NBS-LRR class) family (best arabidopsis hit)
Ghir_A05G003880	PRGDB00143781	82.9	35	6	0	1111	1215	169	203	1.8e-09	64.3	356572	Putative_R-Genes,_predicted_from_Pythozome	Arabidopsis lyrata	T			Disease resistance protein (TIR-NBS-LRR class) family (best arabidopsis hit)
Ghir_A05G005040	PRGDB00143781	80	35	7	0	1029	1133	169	203	9.7e-09	62	356572	Putative_R-Genes,_predicted_from_Pythozome	Arabidopsis lyrata	T			Disease resistance protein (TIR-NBS-LRR class) family (best arabidopsis hit)
Ghir_A08G011570.1	PRGDB00163018	71.7	106	30	0	131	448	1	106	1.1e-36	154.1	Egrandis_v1_0.023118m	Putative_R-Genes,_predicted_from_Pythozome	Areca catechu	T			Disease resistance protein (TIR-NBS-LRR class) family (best arabidopsis hit)
Ghir_A08G011860	PRGDB00163018	72.6	106	29	0	238	555	1	106	4.2e-37	155.6	Egrandis_v1_0.023118m	Putative_R-Genes,_predicted_from_Pythozome	Areca catechu	T			Disease resistance protein (TIR-NBS-LRR class) family (best arabidopsis hit)
Ghir_A08G012860	PRGDB00163364	38.8	103	54	1	3229	2948	1	103	3.2e-14	80.9	Egrandis_v1_0.049512m	Putative_R-Genes,_predicted_from_Pythozome	Areca catechu	T			Disease resistance protein (TIR-NBS-LRR class) family (best arabidopsis hit)
Ghir_A08G012900	PRGDB00163364	38.8	103	54	1	3194	2913	1	103	1.9e-14	81.6	Egrandis_v1_0.049512m	Putative_R-Genes,_predicted_from_Pythozome	Areca catechu	T			Disease resistance protein (TIR-NBS-LRR class) family (best arabidopsis hit)
Ghir_A07G006060	PRGDB00154389	90.6	32	3	0	2383	2478	2	33	1.5e-08	62	orange1.1g013724m	Putative_R-Genes,_predicted_from_Pythozome	Citrus sinensis	T			Disease resistance protein (TIR-NBS-LRR class) family (best arabidopsis hit)
Ghir_A11G032790.1	PRGDB00177940	60.2	181	59	5	47	580	16	186	1.2e-52	209.1	POPTR_0007s04750.1	Putative_R-Genes,_predicted_from_Pythozome	Populus trichocarpa	TNL			Disease resistance protein (TIR-NBS-LRR class) family (best arabidopsis hit)
Ghir_A10G005330	PRGDB00173549	53.3	152	71	0	316	771	20	171	1.4e-42	175.3	ppa022091m	Putative_R-Genes,_predicted_from_Pythozome	Prunus persica	TNL			Disease resistance protein (TIR-NBS-LRR class) family (best arabidopsis hit)
Ghir_A10G006410	PRGDB00173930	63.3	150	54	1	53	502	19	167	3.9e-53	208	ppa024626m	Putative_R-Genes,_predicted_from_Pythozome	Prunus persica	TNL			Disease resistance protein (TIR-NBS-LRR class) family (best arabidopsis hit)
Ghir_A06G012080	PRGDB00150004	40.3	1180	617	17	361	3723	18	1169	3e-227	788.9	evm.model.supercontig_27.17	Putative_R-Genes,_predicted_from_Pythozome	Arabidopsis lyrata subsp. lyrata	TNL			disease resistance protein (TIR-NBS-LRR class), putative (best arabidopsis hit)
Ghir_A08G011250	PRGDB00162919	40.8	103	37	3	169	477	645	723	4.8e-12	72	Egrandis_v1_0.004137m	Putative_R-Genes,_predicted_from_Pythozome	Areca catechu	TNL			disease resistance protein (TIR-NBS-LRR class), putative (best arabidopsis hit)
Ghir_A06G003340	PRGDB00149454	45.2	332	178	4	1109	2098	21	350	5.6e-71	269.6	clementine0.9_034751m	Putative_R-Genes,_predicted_from_Pythozome	Citrus clementina	NL			disease resistance protein (TIR-NBS-LRR class), putative (best arabidopsis hit)
Ghir_A06G003890	PRGDB00149481	52.4	63	29	1	4021	4206	736	798	1.1e-06	56.6	clementine0.9_036043m	Putative_R-Genes,_predicted_from_Pythozome	Citrus clementina	TNL			disease resistance protein (TIR-NBS-LRR class), putative (best arabidopsis hit)
Ghir_A06G006120.1	PRGDB00149509	43.7	1198	616	15	316	3864	13	1166	2.5e-251	869	clementine0.9_035990m	Putative_R-Genes,_predicted_from_Pythozome	Citrus clementina	TNL			disease resistance protein (TIR-NBS-LRR class), putative (best arabidopsis hit)
Ghir_A11G023840	PRGDB00177139	48.9	479	232	4	174	1574	2	479	8.4e-124	443.7	29929.m004540	Putative_R-Genes,_predicted_from_Pythozome	Oryza barthii	TNL			disease resistance protein (TIR-NBS-LRR class), putative (best arabidopsis hit)
Ghir_A09G002600	PRGDB00166209	49.9	517	257	2	483	2033	25	539	2.5e-139	496.5	cassava4.1_028330m	Putative_R-Genes,_predicted_from_Pythozome	Vitis aestivalis	TNL			disease resistance protein (TIR-NBS-LRR class), putative (best arabidopsis hit)
Ghir_A11G009810	PRGDB00177064	44.7	47	25	1	914	1051	387	433	8.3e-07	55.1	29912.m005281	Putative_R-Genes,_predicted_from_Pythozome	Oryza barthii	N			Flavin-binding monooxygenase family protein (best arabidopsis hit)
Ghir_A11G010680	PRGDB00177064	48.1	54	28	0	736	897	380	433	1.5e-09	63.5	29912.m005281	Putative_R-Genes,_predicted_from_Pythozome	Oryza barthii	N			Flavin-binding monooxygenase family protein (best arabidopsis hit)
Ghir_A11G012160	PRGDB00177064	52.9	51	24	0	1182	1334	380	430	4.9e-10	65.9	29912.m005281	Putative_R-Genes,_predicted_from_Pythozome	Oryza barthii	N			Flavin-binding monooxygenase family protein (best arabidopsis hit)
Ghir_A11G013860	PRGDB00177064	47.9	48	23	2	5042	5182	387	433	3.9e-07	58.2	29912.m005281	Putative_R-Genes,_predicted_from_Pythozome	Oryza barthii	N			Flavin-binding monooxygenase family protein (best arabidopsis hit)
Ghir_A11G014110	PRGDB00177064	46.8	47	24	1	1169	1306	387	433	1e-08	61.6	29912.m005281	Putative_R-Genes,_predicted_from_Pythozome	Oryza barthii	N			Flavin-binding monooxygenase family protein (best arabidopsis hit)
Ghir_A07G014530	PRGDB00156657	41.3	143	42	6	716	1027	145	284	2.1e-15	83.6	Glyma03g23250.1	Putative_R-Genes,_predicted_from_Pythozome	Glycine max	T			GATA transcription factor 2 (best arabidopsis hit)
Ghir_A07G015870	PRGDB00156657	42.9	175	70	4	2854	3378	140	284	6e-24	113.2	Glyma03g23250.1	Putative_R-Genes,_predicted_from_Pythozome	Glycine max	T			GATA transcription factor 2 (best arabidopsis hit)
Ghir_A07G016260	PRGDB00156657	56.3	71	31	0	1008	1220	214	284	1.7e-15	84	Glyma03g23250.1	Putative_R-Genes,_predicted_from_Pythozome	Glycine max	T			GATA transcription factor 2 (best arabidopsis hit)
Ghir_A07G017000	PRGDB00156657	36.6	153	81	3	737	1192	147	284	1.5e-16	88.2	Glyma03g23250.1	Putative_R-Genes,_predicted_from_Pythozome	Glycine max	T			GATA transcription factor 2 (best arabidopsis hit)
Ghir_A07G017450	PRGDB00156657	66.7	57	19	0	618	788	228	284	2.3e-15	83.2	Glyma03g23250.1	Putative_R-Genes,_predicted_from_Pythozome	Glycine max	T			GATA transcription factor 2 (best arabidopsis hit)
Ghir_A07G017990	PRGDB00156657	36.6	153	61	4	668	1018	132	284	5.6e-16	85.5	Glyma03g23250.1	Putative_R-Genes,_predicted_from_Pythozome	Glycine max	T			GATA transcription factor 2 (best arabidopsis hit)
Ghir_A07G018330	PRGDB00156657	64.9	57	20	0	1267	1437	228	284	1.8e-13	77.4	Glyma03g23250.1	Putative_R-Genes,_predicted_from_Pythozome	Glycine max	T			GATA transcription factor 2 (best arabidopsis hit)
Ghir_A07G018490	PRGDB00156657	44.8	181	73	5	1425	1967	131	284	8e-27	122.1	Glyma03g23250.1	Putative_R-Genes,_predicted_from_Pythozome	Glycine max	T			GATA transcription factor 2 (best arabidopsis hit)
BGI_novel_G005003	PRGDB00068586	88.7	231	26	0	978	1670	1	231	2.8e-112	405.6	Ghi.17924	Putative_R-Genes,_predicted_from_NCBI_UniGene	Gossypium hirsutum	NL	73866160	DT468898	GH_CHX22K03.f GH_CHX Gossypium hirsutum cDNA clone GH_CHX22K03 5', mRNA sequence
BGI_novel_G001455	PRGDB00050753	58.5	212	87	1	153	785	428	639	3.2e-74	278.5	R 11	Putative_R-Genes,_collected_from_NCBI_Protein	Glycine max	TNL	27764534	AF541963	Glycine max cv Williams 82 BAC clone Gm_ISb001_091_F11, complete sequence.
Ghir_A09G018830	PRGDB00167710	82.7	393	66	1	397	1575	878	1268	8.8e-180	630.6	Medtr2g047020.1	Putative_R-Genes,_predicted_from_Pythozome	Medicago truncatula	TNL			heat shock cognate protein 70-1 (best arabidopsis hit)
Ghir_A13G019570	PRGDB00183512	70.3	232	67	2	204	893	791	1022	1.5e-86	319.7	GSVIVT01018889001	Putative_R-Genes,_predicted_from_Pythozome	Vitis vinifera	CNL			HOPZ-ACTIVATED RESISTANCE 1 (best arabidopsis hit)
BGI_novel_G005164	PRGDB00069800	22.6	328	222	8	1835	2794	1012	1315	1e-05	52.8	Hv.8717	Putative_R-Genes,_predicted_from_NCBI_UniGene	Hordeum vulgare	CNL	28555893	AJ507093	Hordeum vulgare mRNA for NBS-LRR disease resistance protein homologue (rga S-9201 gene)
Ghir_D02G023670	PRGDB00189912	23.1	364	244	10	1105	2109	197	553	3.8e-22	106.7	Hv.36068	Putative_R-Genes,_predicted_from_NCBI_UniGene	Hordeum vulgare	N	326508777	AK364708	Hordeum vulgare subsp. vulgare mRNA for predicted protein, complete cds, clone: NIASHv2027L24
Ghir_D02G024050	PRGDB00189912	29.3	287	183	8	964	1776	197	479	5.9e-25	116.3	Hv.36068	Putative_R-Genes,_predicted_from_NCBI_UniGene	Hordeum vulgare	N	326508777	AK364708	Hordeum vulgare subsp. vulgare mRNA for predicted protein, complete cds, clone: NIASHv2027L24
Ghir_D02G013030	PRGDB00189664	53.4	58	23	2	484	651	636	691	2.3e-08	61.6	Hv.31767	Putative_R-Genes,_predicted_from_NCBI_UniGene	Hordeum vulgare	NL	326501247	AK367652	Hordeum vulgare subsp. vulgare mRNA for predicted protein, complete cds, clone: NIASHv2059P21
Ghir_D02G014280	PRGDB00189664	46.5	71	33	3	366	569	623	691	5.4e-07	57	Hv.31767	Putative_R-Genes,_predicted_from_NCBI_UniGene	Hordeum vulgare	NL	326501247	AK367652	Hordeum vulgare subsp. vulgare mRNA for predicted protein, complete cds, clone: NIASHv2059P21
Ghir_D02G014350	PRGDB00189664	53.4	58	23	2	675	842	636	691	2.5e-08	61.6	Hv.31767	Putative_R-Genes,_predicted_from_NCBI_UniGene	Hordeum vulgare	NL	326501247	AK367652	Hordeum vulgare subsp. vulgare mRNA for predicted protein, complete cds, clone: NIASHv2059P21
Ghir_D02G011300	PRGDB00189344	36	114	65	4	1201	1527	1147	1257	4.9e-09	63.5	Hv.10056	Putative_R-Genes,_predicted_from_NCBI_UniGene	Hordeum vulgare	NL	326521753	AK369251	Hordeum vulgare subsp. vulgare mRNA for predicted protein, complete cds, clone: NIASHv2087M16
Ghir_D02G020650	PRGDB00189864	51.9	108	52	0	403	726	1040	1147	7.7e-27	123.2	Hv.35067	Putative_R-Genes,_predicted_from_NCBI_UniGene	Hordeum vulgare	NL	326524336	AK369350	Hordeum vulgare subsp. vulgare mRNA for predicted protein, complete cds, clone: NIASHv2089K17
Ghir_D02G021860	PRGDB00189864	51.9	108	52	0	383	706	1040	1147	1e-26	122.9	Hv.35067	Putative_R-Genes,_predicted_from_NCBI_UniGene	Hordeum vulgare	NL	326524336	AK369350	Hordeum vulgare subsp. vulgare mRNA for predicted protein, complete cds, clone: NIASHv2089K17
Ghir_D02G022070	PRGDB00189864	54.4	204	78	3	131	742	1038	1226	6.8e-51	202.6	Hv.35067	Putative_R-Genes,_predicted_from_NCBI_UniGene	Hordeum vulgare	NL	326524336	AK369350	Hordeum vulgare subsp. vulgare mRNA for predicted protein, complete cds, clone: NIASHv2089K17
Ghir_D02G022160	PRGDB00189864	48.4	124	64	0	262	633	1040	1163	9.9e-31	135.6	Hv.35067	Putative_R-Genes,_predicted_from_NCBI_UniGene	Hordeum vulgare	NL	326524336	AK369350	Hordeum vulgare subsp. vulgare mRNA for predicted protein, complete cds, clone: NIASHv2089K17
Ghir_D03G000120	PRGDB00189975	39.3	89	45	4	526	786	1514	1595	6.7e-09	61.6	Hv.37291	Putative_R-Genes,_predicted_from_NCBI_UniGene	Hordeum vulgare	NL	326489646	AK370605	Hordeum vulgare subsp. vulgare mRNA for predicted protein, complete cds, clone: NIASHv2113B23
Ghir_D02G017440	PRGDB00189838	44.9	365	185	5	19	1110	1238	1587	1.6e-82	306.2	Hv.34616	Putative_R-Genes,_predicted_from_NCBI_UniGene	Hordeum vulgare	NL	326530114	AK377143	Hordeum vulgare subsp. vulgare mRNA for predicted protein, partial cds, clone: NIASHv3149K09
Ghir_D02G017440.1	PRGDB00189838	51.7	58	26	2	385	555	1254	1310	5.7e-08	58.5	Hv.34616	Putative_R-Genes,_predicted_from_NCBI_UniGene	Hordeum vulgare	NL	326530114	AK377143	Hordeum vulgare subsp. vulgare mRNA for predicted protein, partial cds, clone: NIASHv3149K09
Ghir_D02G017790	PRGDB00189838	58.3	321	132	2	287	1246	1254	1573	3.3e-105	382.1	Hv.34616	Putative_R-Genes,_predicted_from_NCBI_UniGene	Hordeum vulgare	NL	326530114	AK377143	Hordeum vulgare subsp. vulgare mRNA for predicted protein, partial cds, clone: NIASHv3149K09
Ghir_D02G020180.1	PRGDB00189838	54	326	141	3	1203	2177	1251	1568	4e-95	349.4	Hv.34616	Putative_R-Genes,_predicted_from_NCBI_UniGene	Hordeum vulgare	NL	326530114	AK377143	Hordeum vulgare subsp. vulgare mRNA for predicted protein, partial cds, clone: NIASHv3149K09
Ghir_D02G020190	PRGDB00189838	52.6	152	71	1	1512	1967	1439	1589	5.3e-40	166	Hv.34616	Putative_R-Genes,_predicted_from_NCBI_UniGene	Hordeum vulgare	NL	326530114	AK377143	Hordeum vulgare subsp. vulgare mRNA for predicted protein, partial cds, clone: NIASHv3149K09
Ghir_A06G022820	PRGDB00152926	72.6	266	69	1	477	1274	234	495	2.5e-106	386.3	orange1.1g037562m	Putative_R-Genes,_predicted_from_Pythozome	Citrus sinensis	NL			importin alpha isoform 2 (best arabidopsis hit)
Ghir_D01G001820	PRGDB00184231	50.9	171	84	0	82	594	125	295	3e-43	174.9	GSVIVT01032740001	Putative_R-Genes,_predicted_from_Pythozome	Vitis vinifera	RLP			inflorescence meristem receptor-like kinase 2 (best arabidopsis hit)
Ghir_D01G002000.1	PRGDB00184231	50.9	175	86	0	70	594	121	295	5.4e-45	180.6	GSVIVT01032740001	Putative_R-Genes,_predicted_from_Pythozome	Vitis vinifera	RLP			inflorescence meristem receptor-like kinase 2 (best arabidopsis hit)
Ghir_A05G039600	PRGDB00149059	95.2	42	2	0	3430	3305	609	650	6.2e-15	83.2	evm.model.supercontig_113.44	Putative_R-Genes,_predicted_from_Pythozome	Arabidopsis lyrata subsp. lyrata	RLP			Leucine-rich receptor-like protein kinase family protein (best arabidopsis hit)
Ghir_A06G009240	PRGDB00149780	68.4	942	291	2	658	3483	32	966	0	1320.8	evm.model.supercontig_20.68	Putative_R-Genes,_predicted_from_Pythozome	Arabidopsis lyrata subsp. lyrata	RLP			Leucine-rich receptor-like protein kinase family protein (best arabidopsis hit)
Ghir_A06G016650	PRGDB00150499	71.2	1134	317	5	224	3595	6	1139	0	1552.3	evm.model.supercontig_6.224	Putative_R-Genes,_predicted_from_Pythozome	Arabidopsis lyrata subsp. lyrata	RLP			Leucine-rich receptor-like protein kinase family protein (best arabidopsis hit)
Ghir_A05G031410	PRGDB00148473	70.2	1170	346	3	493	3996	15	1183	0	1625.9	clementine0.9_000750m	Putative_R-Genes,_predicted_from_Pythozome	Citrus clementina	RLP			Leucine-rich receptor-like protein kinase family protein (best arabidopsis hit)
Ghir_A11G004140	PRGDB00176387	82.3	945	162	2	699	3521	20	963	0	1550.4	29739.m003626	Putative_R-Genes,_predicted_from_Pythozome	Oryza barthii	RLP			Leucine-rich receptor-like protein kinase family protein (best arabidopsis hit)
Ghir_A11G004480	PRGDB00176387	84.9	978	148	0	113	3046	3	980	0	1680.6	29739.m003626	Putative_R-Genes,_predicted_from_Pythozome	Oryza barthii	RLP			Leucine-rich receptor-like protein kinase family protein (best arabidopsis hit)
Ghir_A11G004490	PRGDB00176387	84.9	978	148	0	459	3392	3	980	0	1681	29739.m003626	Putative_R-Genes,_predicted_from_Pythozome	Oryza barthii	RLP			Leucine-rich receptor-like protein kinase family protein (best arabidopsis hit)
Ghir_A10G019370	PRGDB00175322	65.7	955	326	2	627	3488	25	978	0	1246.9	POPTR_0019s10720.3	Putative_R-Genes,_predicted_from_Pythozome	Populus trichocarpa	RLP			Leucine-rich receptor-like protein kinase family protein (best arabidopsis hit)
Ghir_A10G023950	PRGDB00176101	66.4	943	285	3	684	3425	30	969	0	1265.4	POPTR_0009s08540.1	Putative_R-Genes,_predicted_from_Pythozome	Populus trichocarpa	RLP			Leucine-rich receptor-like protein kinase family protein (best arabidopsis hit)
Ghir_A08G007740	PRGDB00161885	67.1	966	311	3	97	2994	9	967	0	1285.4	cassava4.1_001017m	Putative_R-Genes,_predicted_from_Pythozome	Vitis aestivalis	RLP			Leucine-rich receptor-like protein kinase family protein (best arabidopsis hit)
Ghir_A08G014560	PRGDB00163961	68	961	304	4	466	3339	8	967	0	1309.3	cassava4.1_000947m	Putative_R-Genes,_predicted_from_Pythozome	Vitis aestivalis	RLP			Leucine-rich receptor-like protein kinase family protein (best arabidopsis hit)
Ghir_A05G009840.1	PRGDB00146307	50.1	355	158	3	1811	2818	1029	1383	7.4e-93	342	Bradi1g72570.1	Putative_R-Genes,_predicted_from_Pythozome	Ricinus communis	RLP			Leucine-rich receptor-like protein kinase family protein (best arabidopsis hit); systemin receptor SR160 precursor, putative, expressed (best rice hit)
Ghir_A05G009880	PRGDB00146307	50.8	364	164	2	152	1198	1021	1384	2.8e-102	372.1	Bradi1g72570.1	Putative_R-Genes,_predicted_from_Pythozome	Ricinus communis	RLP			Leucine-rich receptor-like protein kinase family protein (best arabidopsis hit); systemin receptor SR160 precursor, putative, expressed (best rice hit)
Ghir_A05G043440	PRGDB00149250	79.3	835	172	1	860	3361	17	851	0	1333.9	evm.model.supercontig_1348.2	Putative_R-Genes,_predicted_from_Pythozome	Arabidopsis lyrata subsp. lyrata	RLP			Leucine-rich repeat protein kinase family protein (best arabidopsis hit)
Ghir_A06G000100.1	PRGDB00149250	78.6	851	181	1	508	3057	1	851	0	1345.9	evm.model.supercontig_1348.2	Putative_R-Genes,_predicted_from_Pythozome	Arabidopsis lyrata subsp. lyrata	RLP			Leucine-rich repeat protein kinase family protein (best arabidopsis hit)
Ghir_A06G012860.1	PRGDB00150119	73.9	656	161	3	327	2264	21	676	3.2e-285	980.7	evm.model.supercontig_3.281	Putative_R-Genes,_predicted_from_Pythozome	Arabidopsis lyrata subsp. lyrata	RLP			Leucine-rich repeat protein kinase family protein (best arabidopsis hit)
Ghir_A06G012870	PRGDB00150119	73.9	656	161	3	316	2253	21	676	1.9e-285	981.5	evm.model.supercontig_3.281	Putative_R-Genes,_predicted_from_Pythozome	Arabidopsis lyrata subsp. lyrata	RLP			Leucine-rich repeat protein kinase family protein (best arabidopsis hit)
Ghir_A06G016290.1	PRGDB00150496	56.2	769	280	9	31	2184	8	770	6e-229	793.5	evm.model.supercontig_6.100	Putative_R-Genes,_predicted_from_Pythozome	Arabidopsis lyrata subsp. lyrata	RLP			Leucine-rich repeat protein kinase family protein (best arabidopsis hit)
Ghir_A06G018280.1	PRGDB00150642	64.3	624	217	3	311	2170	22	643	2.4e-221	768.5	evm.model.supercontig_85.116	Putative_R-Genes,_predicted_from_Pythozome	Arabidopsis lyrata subsp. lyrata	RLP			Leucine-rich repeat protein kinase family protein (best arabidopsis hit)
Ghir_A06G019210	PRGDB00150715	67.4	1101	328	8	183	3413	1	1094	0	1457.2	evm.TU.contig_30789.1	Putative_R-Genes,_predicted_from_Pythozome	Arabidopsis lyrata subsp. lyrata	RLP			Leucine-rich repeat protein kinase family protein (best arabidopsis hit)
Ghir_A05G018710	PRGDB00147502	73.4	590	156	1	464	2230	7	596	2.6e-252	871.3	clementine0.9_005605m	Putative_R-Genes,_predicted_from_Pythozome	Citrus clementina	RLP			Leucine-rich repeat protein kinase family protein (best arabidopsis hit)
Ghir_A05G019350	PRGDB00147536	62.7	769	267	3	1	2247	1	769	1.2e-269	928.7	clementine0.9_003001m	Putative_R-Genes,_predicted_from_Pythozome	Citrus clementina	RLP			Leucine-rich repeat protein kinase family protein (best arabidopsis hit)
Ghir_A05G020480	PRGDB00147536	65	748	254	3	660	2879	1	748	2.7e-273	941.4	clementine0.9_003001m	Putative_R-Genes,_predicted_from_Pythozome	Citrus clementina	RLP			Leucine-rich repeat protein kinase family protein (best arabidopsis hit)
Ghir_A05G021480	PRGDB00147571	57.5	179	75	1	889	1422	911	1089	2.5e-52	208	clementine0.9_000952m	Putative_R-Genes,_predicted_from_Pythozome	Citrus clementina	RLP			Leucine-rich repeat protein kinase family protein (best arabidopsis hit)
Ghir_A05G032400	PRGDB00148506	69.2	656	200	2	450	2414	22	676	9.8e-263	906	clementine0.9_004009m	Putative_R-Genes,_predicted_from_Pythozome	Citrus clementina	RLP			Leucine-rich repeat protein kinase family protein (best arabidopsis hit)
Ghir_A05G032490.1	PRGDB00148506	69.5	656	198	2	357	2321	22	676	1.5e-263	908.7	clementine0.9_004009m	Putative_R-Genes,_predicted_from_Pythozome	Citrus clementina	RLP			Leucine-rich repeat protein kinase family protein (best arabidopsis hit)
Ghir_A05G034000	PRGDB00148579	64.2	960	306	4	306	3176	80	1004	0	1204.5	clementine0.9_034053m	Putative_R-Genes,_predicted_from_Pythozome	Citrus clementina	RLP			Leucine-rich repeat protein kinase family protein (best arabidopsis hit)
Ghir_A06G000280	PRGDB00149305	67.3	652	198	7	18	1928	297	948	5.6e-240	830.1	clementine0.9_001656m	Putative_R-Genes,_predicted_from_Pythozome	Citrus clementina	RLP			Leucine-rich repeat protein kinase family protein (best arabidopsis hit)
Ghir_A06G020270	PRGDB00152270	73.5	1078	282	4	585	3809	27	1103	0	1556.6	orange1.1g001253m	Putative_R-Genes,_predicted_from_Pythozome	Citrus sinensis	RLP			Leucine-rich repeat protein kinase family protein (best arabidopsis hit)
Ghir_A06G020580	PRGDB00152270	72.9	1078	289	3	558	3785	27	1103	0	1550	orange1.1g001253m	Putative_R-Genes,_predicted_from_Pythozome	Citrus sinensis	RLP			Leucine-rich repeat protein kinase family protein (best arabidopsis hit)
Ghir_A07G002000	PRGDB00153327	74.3	382	95	1	1066	2202	381	762	2.6e-162	572.4	orange1.1g004129m	Putative_R-Genes,_predicted_from_Pythozome	Citrus sinensis	RLP			Leucine-rich repeat protein kinase family protein (best arabidopsis hit)
Ghir_A07G006060.1	PRGDB00154607	78.6	945	197	5	70	2898	24	965	0	1490.3	orange1.1g002121m	Putative_R-Genes,_predicted_from_Pythozome	Citrus sinensis	RLP			Leucine-rich repeat protein kinase family protein (best arabidopsis hit)
Ghir_A07G007290	PRGDB00154894	68.4	541	166	3	766	2382	39	576	6.2e-211	733.8	orange1.1g007788m	Putative_R-Genes,_predicted_from_Pythozome	Citrus sinensis	RLP			Leucine-rich repeat protein kinase family protein (best arabidopsis hit)
Ghir_A07G008430	PRGDB00155209	62.3	1020	340	3	16	2943	5	1023	0	1203.3	orange1.1g001700m	Putative_R-Genes,_predicted_from_Pythozome	Citrus sinensis	RLP			Leucine-rich repeat protein kinase family protein (best arabidopsis hit)
Ghir_A07G011830	PRGDB00155561	62.1	457	153	4	6365	5052	25	480	2.8e-152	540.4	orange1.1g005999m	Putative_R-Genes,_predicted_from_Pythozome	Citrus sinensis	RLP			Leucine-rich repeat protein kinase family protein (best arabidopsis hit)
Ghir_A10G021120.1	PRGDB00175773	46.9	143	76	0	1462	1034	28	170	1.5e-33	144.4	27622.m000146	Putative_R-Genes,_predicted_from_Pythozome	Oryza barthii	RLP			Leucine-rich repeat protein kinase family protein (best arabidopsis hit)
Ghir_A10G024190	PRGDB00176116	69.6	932	270	8	315	3089	36	961	0	1253.4	29439.m000228	Putative_R-Genes,_predicted_from_Pythozome	Oryza barthii	RLP			Leucine-rich repeat protein kinase family protein (best arabidopsis hit)
Ghir_A11G005420	PRGDB00176556	61.3	574	181	5	64	1665	24	596	1.5e-195	682.2	29822.m003433	Putative_R-Genes,_predicted_from_Pythozome	Oryza barthii	RLP			Leucine-rich repeat protein kinase family protein (best arabidopsis hit)
Ghir_A11G032840	PRGDB00177991	55.5	902	389	8	626	3313	2	897	1.8e-268	925.6	30170.m014044	Putative_R-Genes,_predicted_from_Pythozome	Oryza barthii	RLP			Leucine-rich repeat protein kinase family protein (best arabidopsis hit)
Ghir_A09G024820	PRGDB00170967	42	88	50	1	1536	1796	696	783	2.2e-11	71.2	LOC_Os07g14820.1	Putative_R-Genes,_predicted_from_Pythozome	Oryza sativa	RLP			Leucine-rich repeat protein kinase family protein (best arabidopsis hit)
Ghir_A06G019350	PRGDB00151281	67.8	227	35	4	1226	1903	82	271	1.8e-77	290.4	Cucsa.114680.3	Putative_R-Genes,_predicted_from_Pythozome	Pennisetum glaucum	RLP			Leucine-rich repeat protein kinase family protein (best arabidopsis hit)
Ghir_A10G014600.1	PRGDB00174904	73.5	648	160	6	255	2174	36	679	1.7e-272	938.3	POPTR_0006s11840.1	Putative_R-Genes,_predicted_from_Pythozome	Populus trichocarpa	RLP			Leucine-rich repeat protein kinase family protein (best arabidopsis hit)
Ghir_A11G031030	PRGDB00177777	56.2	646	197	10	100	1851	26	647	3.3e-188	657.9	POPTR_0010s19270.1	Putative_R-Genes,_predicted_from_Pythozome	Populus trichocarpa	RLP			Leucine-rich repeat protein kinase family protein (best arabidopsis hit)
Ghir_A11G032370.1	PRGDB00177892	81.8	704	125	3	418	2520	13	716	0	1153.7	POPTR_0010s13000.1	Putative_R-Genes,_predicted_from_Pythozome	Populus trichocarpa	RLP			Leucine-rich repeat protein kinase family protein (best arabidopsis hit)
Ghir_A12G002190	PRGDB00178613	48.3	1009	499	5	215	3175	6	1013	1.8e-264	912.1	POPTR_0008s03400.1	Putative_R-Genes,_predicted_from_Pythozome	Populus trichocarpa	RLP			Leucine-rich repeat protein kinase family protein (best arabidopsis hit)
Ghir_A08G013610	PRGDB00163861	72.8	629	169	2	410	2290	20	648	9.1e-277	952.6	cassava4.1_003177m	Putative_R-Genes,_predicted_from_Pythozome	Vitis aestivalis	RLP			Leucine-rich repeat protein kinase family protein (best arabidopsis hit)
Ghir_A08G014150	PRGDB00163861	75.6	454	109	2	1437	2792	192	645	3.2e-207	721.8	cassava4.1_003177m	Putative_R-Genes,_predicted_from_Pythozome	Vitis aestivalis	RLP			Leucine-rich repeat protein kinase family protein (best arabidopsis hit)
Ghir_A08G017600	PRGDB00164688	61.6	747	284	3	599	2833	160	905	1.9e-255	882.1	cassava4.1_001333m	Putative_R-Genes,_predicted_from_Pythozome	Vitis aestivalis	RLP			Leucine-rich repeat protein kinase family protein (best arabidopsis hit)
Ghir_A08G024500	PRGDB00165532	51.4	1036	430	13	91	3042	9	1023	1.1e-276	952.6	cassava4.1_023021m	Putative_R-Genes,_predicted_from_Pythozome	Vitis aestivalis	RLP			Leucine-rich repeat protein kinase family protein (best arabidopsis hit)
Ghir_A08G025040	PRGDB00165767	57.4	798	295	16	775	3111	1	772	7.6e-234	810.4	cassava4.1_002087m	Putative_R-Genes,_predicted_from_Pythozome	Vitis aestivalis	RLP			Leucine-rich repeat protein kinase family protein (best arabidopsis hit)
Ghir_A08G025090	PRGDB00165767	59.4	387	130	9	1128	2219	180	562	1.8e-112	407.1	cassava4.1_002087m	Putative_R-Genes,_predicted_from_Pythozome	Vitis aestivalis	RLP			Leucine-rich repeat protein kinase family protein (best arabidopsis hit)
Ghir_A09G004220.1	PRGDB00166219	81.2	908	166	3	67	2790	23	925	0	1492.6	cassava4.1_001236m	Putative_R-Genes,_predicted_from_Pythozome	Vitis aestivalis	RLP			Leucine-rich repeat protein kinase family protein (best arabidopsis hit)
Ghir_A09G005560	PRGDB00166395	71.4	932	257	6	576	3365	35	958	0	1295.8	cassava4.1_001075m	Putative_R-Genes,_predicted_from_Pythozome	Vitis aestivalis	RLP			Leucine-rich repeat protein kinase family protein (best arabidopsis hit)
Ghir_A12G027420	PRGDB00182795	42.1	76	42	1	343	564	1098	1173	5.5e-09	60.8	GSVIVT01000058001	Putative_R-Genes,_predicted_from_Pythozome	Vitis vinifera	RLP			Leucine-rich repeat protein kinase family protein (best arabidopsis hit)
Ghir_A12G027760	PRGDB00182795	37.5	168	100	3	2532	2044	1082	1249	1.3e-22	108.6	GSVIVT01000058001	Putative_R-Genes,_predicted_from_Pythozome	Vitis vinifera	RLP			Leucine-rich repeat protein kinase family protein (best arabidopsis hit)
Ghir_A12G028180	PRGDB00182795	37.5	224	128	6	181	828	1052	1271	1.4e-34	146.7	GSVIVT01000058001	Putative_R-Genes,_predicted_from_Pythozome	Vitis vinifera	RLP			Leucine-rich repeat protein kinase family protein (best arabidopsis hit)
Ghir_A12G028190	PRGDB00182795	41.8	196	108	3	85	654	1076	1271	3.9e-38	157.9	GSVIVT01000058001	Putative_R-Genes,_predicted_from_Pythozome	Vitis vinifera	RLP			Leucine-rich repeat protein kinase family protein (best arabidopsis hit)
Ghir_A12G028240.1	PRGDB00182795	43	151	81	3	109	549	1098	1247	9.1e-29	126.7	GSVIVT01000058001	Putative_R-Genes,_predicted_from_Pythozome	Vitis vinifera	RLP			Leucine-rich repeat protein kinase family protein (best arabidopsis hit)
Ghir_A12G028400	PRGDB00182795	39.3	168	98	3	151	645	1081	1247	8.6e-26	117.5	GSVIVT01000058001	Putative_R-Genes,_predicted_from_Pythozome	Vitis vinifera	RLP			Leucine-rich repeat protein kinase family protein (best arabidopsis hit)
Ghir_A13G019530	PRGDB00183494	65.2	1077	361	7	501	3704	35	1106	0	1360.5	GSVIVT01018052001	Putative_R-Genes,_predicted_from_Pythozome	Vitis vinifera	RLP			Leucine-rich repeat protein kinase family protein (best arabidopsis hit)
Ghir_D01G001800	PRGDB00184153	78	427	92	2	1492	2769	473	898	1.1e-192	673.3	GSVIVT01031618001	Putative_R-Genes,_predicted_from_Pythozome	Vitis vinifera	RLP			Leucine-rich repeat protein kinase family protein (best arabidopsis hit)
Ghir_D13G018340	PRGDB00182795	62.1	232	88	0	7	702	1041	1272	5.8e-81	300.8	GSVIVT01000058001	Putative_R-Genes,_predicted_from_Pythozome	Vitis vinifera	RLP			Leucine-rich repeat protein kinase family protein (best arabidopsis hit)
Ghir_D13G021210.1	PRGDB00182795	61.9	223	85	0	14	682	1050	1272	4.3e-76	284.6	GSVIVT01000058001	Putative_R-Genes,_predicted_from_Pythozome	Vitis vinifera	RLP			Leucine-rich repeat protein kinase family protein (best arabidopsis hit)
Ghir_A05G024240	PRGDB00147868	44.6	812	343	9	142	2448	102	849	1.4e-173	609.8	clementine0.9_027599m	Putative_R-Genes,_predicted_from_Pythozome	Citrus clementina	RLP			Leucine-rich repeat receptor-like protein kinase family protein (best arabidopsis hit)
Ghir_A11G000800	PRGDB00176243	60.3	1198	472	3	336	3920	23	1219	0	1418.7	29637.m000755	Putative_R-Genes,_predicted_from_Pythozome	Oryza barthii	RLP			Leucine-rich repeat receptor-like protein kinase family protein (best arabidopsis hit)
Ghir_A11G034330.1	PRGDB00178121	47.8	885	409	12	54	2639	1	855	1.3e-204	713	POPTR_0002s12270.1	Putative_R-Genes,_predicted_from_Pythozome	Populus trichocarpa	RLP			Leucine-rich repeat receptor-like protein kinase family protein (best arabidopsis hit)
Ghir_A10G009270	PRGDB00174306	49.3	1070	484	8	122	3166	24	1090	6e-281	966.8	ppa025153m	Putative_R-Genes,_predicted_from_Pythozome	Prunus persica	RLP			Leucine-rich repeat receptor-like protein kinase family protein (best arabidopsis hit)
Ghir_A10G009390	PRGDB00174306	55.6	1038	416	7	634	3624	23	1056	0	1096.3	ppa025153m	Putative_R-Genes,_predicted_from_Pythozome	Prunus persica	RLP			Leucine-rich repeat receptor-like protein kinase family protein (best arabidopsis hit)
Ghir_A13G010650	PRGDB00183143	65.7	359	119	3	172	1242	1	357	1.4e-133	476.1	GSVIVT01011370001	Putative_R-Genes,_predicted_from_Pythozome	Vitis vinifera	RLP			Leucine-rich repeat receptor-like protein kinase family protein (best arabidopsis hit)
Ghir_A05G037850	PRGDB00148966	68.2	1298	358	3	218	3949	1	1297	0	1739.2	evm.model.supercontig_107.30	Putative_R-Genes,_predicted_from_Pythozome	Arabidopsis lyrata subsp. lyrata	RLP			Leucine-rich repeat transmembrane protein kinase (best arabidopsis hit)
Ghir_A07G021330	PRGDB00157599	65.8	1012	337	7	413	3427	3	1012	0	1314.3	orange1.1g001767m	Putative_R-Genes,_predicted_from_Pythozome	Citrus sinensis	RLP			Leucine-rich repeat transmembrane protein kinase (best arabidopsis hit)
Ghir_A10G024580	PRGDB00176202	77.4	903	201	2	3348	6056	6	905	0	1418.7	29618.m000102	Putative_R-Genes,_predicted_from_Pythozome	Oryza barthii	RLP			Leucine-rich repeat transmembrane protein kinase (best arabidopsis hit)
Ghir_A10G002720.4	PRGDB00172410	66.6	422	139	2	1511	2770	255	676	2.9e-162	572.8	ppa001152m	Putative_R-Genes,_predicted_from_Pythozome	Prunus persica	RLP			Leucine-rich repeat transmembrane protein kinase (best arabidopsis hit)
Ghir_A13G020490.3	PRGDB00183610	64.6	982	336	5	98	3040	1	971	0	1258.4	GSVIVT01021289001	Putative_R-Genes,_predicted_from_Pythozome	Vitis vinifera	RLP			Leucine-rich repeat transmembrane protein kinase (best arabidopsis hit)
Ghir_A06G017260	PRGDB00150537	77.2	648	144	4	329	2272	31	674	1.5e-291	1001.9	evm.model.supercontig_65.54	Putative_R-Genes,_predicted_from_Pythozome	Arabidopsis lyrata subsp. lyrata	RLP			leucine-rich repeat transmembrane protein kinase family protein (best arabidopsis hit)
Ghir_A05G038050	PRGDB00148988	69.4	1070	318	4	281	3469	1	1068	0	1477.6	clementine0.9_001025m	Putative_R-Genes,_predicted_from_Pythozome	Citrus clementina	RLP			Leucine-rich repeat transmembrane protein kinase family protein (best arabidopsis hit)
Ghir_A05G038190	PRGDB00148988	68.2	1070	331	4	128	3316	1	1068	0	1452.6	clementine0.9_001025m	Putative_R-Genes,_predicted_from_Pythozome	Citrus clementina	RLP			Leucine-rich repeat transmembrane protein kinase family protein (best arabidopsis hit)
Ghir_A11G002920	PRGDB00176361	59.5	946	343	9	16	2748	14	954	1.2e-290	998.8	29728.m000836	Putative_R-Genes,_predicted_from_Pythozome	Oryza barthii	RLP			leucine-rich repeat transmembrane protein kinase family protein (best arabidopsis hit)
Ghir_A11G003460.1	PRGDB00176361	51.5	653	305	7	318	2255	14	661	1.2e-158	560.5	29728.m000836	Putative_R-Genes,_predicted_from_Pythozome	Oryza barthii	RLP			leucine-rich repeat transmembrane protein kinase family protein (best arabidopsis hit)
Ghir_A13G024780	PRGDB00183987	60.8	528	195	4	196	1773	1	518	9.9e-187	653.3	GSVIVT01028433001	Putative_R-Genes,_predicted_from_Pythozome	Vitis vinifera	RLP			Leucine-rich repeat transmembrane protein kinase family protein (best arabidopsis hit)
Ghir_A09G019490	PRGDB00167788	77.3	119	27	0	261	617	37	155	3.7e-51	202.6	Medtr2g121840.1	Putative_R-Genes,_predicted_from_Pythozome	Medicago truncatula	RLP			Leucine-rich repeat transmembrane protein kinase protein (best arabidopsis hit)
Ghir_A09G013340	PRGDB00167655	36.1	169	102	3	583	1089	666	828	1.2e-23	110.9	Medtr2g018300.1	Putative_R-Genes,_predicted_from_Pythozome	Medicago truncatula	CNL			LRR and NB-ARC domains-containing disease resistance protein (best arabidopsis hit)
Ghir_A09G014110.2	PRGDB00167655	39.1	215	118	4	163	807	608	809	1.9e-33	143.7	Medtr2g018300.1	Putative_R-Genes,_predicted_from_Pythozome	Medicago truncatula	CNL			LRR and NB-ARC domains-containing disease resistance protein (best arabidopsis hit)
Ghir_A11G031700.1	PRGDB00177852	52.3	1138	502	17	1543	4896	1	1117	0	1083.9	30148.m001424	Putative_R-Genes,_predicted_from_Pythozome	Oryza barthii	NL			LRR and NB-ARC domains-containing disease resistance protein (best arabidopsis hit)
Ghir_A09G020080	PRGDB00169101	80.6	31	6	0	1362	1454	1268	1298	6.7e-07	55.8	LOC_Os02g04530.1	Putative_R-Genes,_predicted_from_Pythozome	Oryza sativa	CNL			LRR and NB-ARC domains-containing disease resistance protein (best arabidopsis hit)
Ghir_A10G020930.1	PRGDB00175646	72.4	98	27	0	23	316	1	98	1.9e-35	152.1	POPTR_0014s01150.1	Putative_R-Genes,_predicted_from_Pythozome	Populus trichocarpa	CNL			LRR and NB-ARC domains-containing disease resistance protein (best arabidopsis hit)
BGI_novel_G005529	PRGDB00174964	53.2	94	42	1	901	1182	35	126	3e-23	110.9	POPTR_0115s00250.1	Putative_R-Genes,_predicted_from_Pythozome	Populus trichocarpa	NL			LRR and NB-ARC domains-containing disease resistance protein (best arabidopsis hit)
Ghir_A10G015160	PRGDB00174964	71.9	64	18	0	3358	3167	55	118	1.4e-19	98.6	POPTR_0115s00250.1	Putative_R-Genes,_predicted_from_Pythozome	Populus trichocarpa	NL			LRR and NB-ARC domains-containing disease resistance protein (best arabidopsis hit)
Ghir_A10G020720	PRGDB00175345	40.4	1224	610	25	101	3529	1	1185	9.5e-226	783.9	POPTR_0019s10290.1	Putative_R-Genes,_predicted_from_Pythozome	Populus trichocarpa	NL			LRR and NB-ARC domains-containing disease resistance protein (best arabidopsis hit)
Ghir_A08G008210	PRGDB00162094	43.8	1288	659	23	326	4111	1	1249	7.1e-274	943.7	cassava4.1_029580m	Putative_R-Genes,_predicted_from_Pythozome	Vitis aestivalis	NL			LRR and NB-ARC domains-containing disease resistance protein (best arabidopsis hit)
Ghir_A13G019450	PRGDB00183463	60.3	73	29	0	1287	1069	810	882	2.8e-12	73.6	GSVIVT01017267001	Putative_R-Genes,_predicted_from_Pythozome	Vitis vinifera	NL			LRR and NB-ARC domains-containing disease resistance protein (best arabidopsis hit)
BGI_novel_G005212	PRGDB00070731	50	112	47	2	731	1042	16	126	4.6e-19	95.5	Mdo.689	Putative_R-Genes,_predicted_from_NCBI_UniGene	Malus x domestica	T	292668962	GU732467	Malus x domestica AP2 domain class transcription factor (AP2D43) mRNA, complete cds
BGI_novel_G006073	PRGDB00070731	47.7	65	31	1	947	1132	25	89	1.7e-08	61.2	Mdo.689	Putative_R-Genes,_predicted_from_NCBI_UniGene	Malus x domestica	T	292668962	GU732467	Malus x domestica AP2 domain class transcription factor (AP2D43) mRNA, complete cds
BGI_novel_G006104	PRGDB00070731	52.3	65	31	0	142	336	18	82	1.4e-13	77	Mdo.689	Putative_R-Genes,_predicted_from_NCBI_UniGene	Malus x domestica	T	292668962	GU732467	Malus x domestica AP2 domain class transcription factor (AP2D43) mRNA, complete cds
BGI_novel_G006147	PRGDB00070731	66.7	63	20	1	436	624	26	87	3.2e-17	89.4	Mdo.689	Putative_R-Genes,_predicted_from_NCBI_UniGene	Malus x domestica	T	292668962	GU732467	Malus x domestica AP2 domain class transcription factor (AP2D43) mRNA, complete cds
BGI_novel_G006183	PRGDB00070731	35	100	61	2	392	691	26	121	5.2e-07	55.1	Mdo.689	Putative_R-Genes,_predicted_from_NCBI_UniGene	Malus x domestica	T	292668962	GU732467	Malus x domestica AP2 domain class transcription factor (AP2D43) mRNA, complete cds
BGI_novel_G006579	PRGDB00070731	79.4	63	13	0	216	404	20	82	2.7e-22	106.3	Mdo.689	Putative_R-Genes,_predicted_from_NCBI_UniGene	Malus x domestica	T	292668962	GU732467	Malus x domestica AP2 domain class transcription factor (AP2D43) mRNA, complete cds
BGI_novel_G006590	PRGDB00070731	49.1	57	29	0	414	584	26	82	3.5e-10	65.9	Mdo.689	Putative_R-Genes,_predicted_from_NCBI_UniGene	Malus x domestica	T	292668962	GU732467	Malus x domestica AP2 domain class transcription factor (AP2D43) mRNA, complete cds
BGI_novel_G006627	PRGDB00070731	32.8	116	74	3	645	983	13	127	3.2e-07	56.2	Mdo.689	Putative_R-Genes,_predicted_from_NCBI_UniGene	Malus x domestica	T	292668962	GU732467	Malus x domestica AP2 domain class transcription factor (AP2D43) mRNA, complete cds
BGI_novel_G006846	PRGDB00070731	47.9	71	36	1	472	681	12	82	7e-13	75.9	Mdo.689	Putative_R-Genes,_predicted_from_NCBI_UniGene	Malus x domestica	T	292668962	GU732467	Malus x domestica AP2 domain class transcription factor (AP2D43) mRNA, complete cds
BGI_novel_G006860	PRGDB00070731	52.7	74	30	1	279	485	15	88	1.4e-14	80.5	Mdo.689	Putative_R-Genes,_predicted_from_NCBI_UniGene	Malus x domestica	T	292668962	GU732467	Malus x domestica AP2 domain class transcription factor (AP2D43) mRNA, complete cds
BGI_novel_G006886	PRGDB00070731	36.4	88	55	1	474	737	26	112	2.3e-07	56.6	Mdo.689	Putative_R-Genes,_predicted_from_NCBI_UniGene	Malus x domestica	T	292668962	GU732467	Malus x domestica AP2 domain class transcription factor (AP2D43) mRNA, complete cds
BGI_novel_G006887	PRGDB00070731	54.4	57	26	0	557	727	26	82	3.8e-11	69.3	Mdo.689	Putative_R-Genes,_predicted_from_NCBI_UniGene	Malus x domestica	T	292668962	GU732467	Malus x domestica AP2 domain class transcription factor (AP2D43) mRNA, complete cds
BGI_novel_G006924	PRGDB00070731	55.1	78	33	1	282	515	6	81	1.6e-15	83.6	Mdo.689	Putative_R-Genes,_predicted_from_NCBI_UniGene	Malus x domestica	T	292668962	GU732467	Malus x domestica AP2 domain class transcription factor (AP2D43) mRNA, complete cds
BGI_novel_G007008	PRGDB00070731	59.6	57	23	0	708	878	26	82	2.2e-13	77	Mdo.689	Putative_R-Genes,_predicted_from_NCBI_UniGene	Malus x domestica	T	292668962	GU732467	Malus x domestica AP2 domain class transcription factor (AP2D43) mRNA, complete cds
BGI_novel_G007436	PRGDB00070731	60	75	25	2	543	767	26	95	2.3e-16	86.7	Mdo.689	Putative_R-Genes,_predicted_from_NCBI_UniGene	Malus x domestica	T	292668962	GU732467	Malus x domestica AP2 domain class transcription factor (AP2D43) mRNA, complete cds
BGI_novel_G007437	PRGDB00070731	32.9	73	49	0	336	554	20	92	2.7e-07	56.6	Mdo.689	Putative_R-Genes,_predicted_from_NCBI_UniGene	Malus x domestica	T	292668962	GU732467	Malus x domestica AP2 domain class transcription factor (AP2D43) mRNA, complete cds
Ghir_A01G000170	PRGDB00070731	50.7	69	34	0	399	605	20	88	1.8e-13	77	Mdo.689	Putative_R-Genes,_predicted_from_NCBI_UniGene	Malus x domestica	T	292668962	GU732467	Malus x domestica AP2 domain class transcription factor (AP2D43) mRNA, complete cds
Ghir_A01G001890.1	PRGDB00070731	50.9	57	28	0	390	560	26	82	2.3e-10	66.6	Mdo.689	Putative_R-Genes,_predicted_from_NCBI_UniGene	Malus x domestica	T	292668962	GU732467	Malus x domestica AP2 domain class transcription factor (AP2D43) mRNA, complete cds
Ghir_A01G004860	PRGDB00070731	62.2	74	28	0	554	775	15	88	3.4e-19	96.3	Mdo.689	Putative_R-Genes,_predicted_from_NCBI_UniGene	Malus x domestica	T	292668962	GU732467	Malus x domestica AP2 domain class transcription factor (AP2D43) mRNA, complete cds
Ghir_A01G005770	PRGDB00070731	64.8	54	18	1	363	524	33	85	7e-12	71.2	Mdo.689	Putative_R-Genes,_predicted_from_NCBI_UniGene	Malus x domestica	T	292668962	GU732467	Malus x domestica AP2 domain class transcription factor (AP2D43) mRNA, complete cds
Ghir_A01G006320	PRGDB00070731	47.1	70	36	1	662	871	14	82	9.7e-10	64.7	Mdo.689	Putative_R-Genes,_predicted_from_NCBI_UniGene	Malus x domestica	T	292668962	GU732467	Malus x domestica AP2 domain class transcription factor (AP2D43) mRNA, complete cds
Ghir_A01G006940	PRGDB00070731	42	88	48	2	227	490	12	96	6.2e-11	68.2	Mdo.689	Putative_R-Genes,_predicted_from_NCBI_UniGene	Malus x domestica	T	292668962	GU732467	Malus x domestica AP2 domain class transcription factor (AP2D43) mRNA, complete cds
Ghir_A01G008390	PRGDB00070731	41.3	63	37	0	386	574	26	88	3.1e-06	52.8	Mdo.689	Putative_R-Genes,_predicted_from_NCBI_UniGene	Malus x domestica	T	292668962	GU732467	Malus x domestica AP2 domain class transcription factor (AP2D43) mRNA, complete cds
Ghir_A05G023870	PRGDB00070731	32.9	73	49	0	911	1129	20	92	3.5e-07	56.6	Mdo.689	Putative_R-Genes,_predicted_from_NCBI_UniGene	Malus x domestica	T	292668962	GU732467	Malus x domestica AP2 domain class transcription factor (AP2D43) mRNA, complete cds
Ghir_D01G019730	PRGDB00186455	41.8	91	45	3	508	759	803	892	1.9e-10	66.6		Putative_R-Genes,_collected_from_NCBI_Protein	Medicago truncatula	NL	357518542	XM_003629512	Medicago truncatula Disease resistance protein (MTR_8g079450) mRNA, complete cds.
Ghir_D04G003520	PRGDB00192459	45.9	266	137	2	680	1459	212	476	7.3e-60	231.5	Mtr.22577	Putative_R-Genes,_predicted_from_NCBI_UniGene	Medicago truncatula	CNL	357509266	XM_003624874	Medicago truncatula NB-LRR type disease resistance protein (MTR_7g089080) mRNA, complete cds
Ghir_D04G004640	PRGDB00192459	30.5	128	83	3	455	838	236	357	1.1e-08	61.6	Mtr.22577	Putative_R-Genes,_predicted_from_NCBI_UniGene	Medicago truncatula	CNL	357509266	XM_003624874	Medicago truncatula NB-LRR type disease resistance protein (MTR_7g089080) mRNA, complete cds
Ghir_D04G005120	PRGDB00192459	25.7	191	134	4	627	1193	253	437	4.4e-06	53.5	Mtr.22577	Putative_R-Genes,_predicted_from_NCBI_UniGene	Medicago truncatula	CNL	357509266	XM_003624874	Medicago truncatula NB-LRR type disease resistance protein (MTR_7g089080) mRNA, complete cds
Ghir_D03G017910.1	PRGDB00192408	24.8	202	131	6	1662	2243	1575	1763	6.7e-07	56.2	Mtr.17858	Putative_R-Genes,_predicted_from_NCBI_UniGene	Medicago truncatula	NL	357472002	XM_003606238	Medicago truncatula NBS resistance protein (MTR_4g055630) mRNA, complete cds
Ghir_D04G001300	PRGDB00192408	27.2	213	136	5	893	1504	1562	1764	1.2e-14	81.3	Mtr.17858	Putative_R-Genes,_predicted_from_NCBI_UniGene	Medicago truncatula	NL	357472002	XM_003606238	Medicago truncatula NBS resistance protein (MTR_4g055630) mRNA, complete cds
Ghir_D04G002620	PRGDB00192408	31.2	208	121	6	2320	2910	1570	1766	1.5e-17	92	Mtr.17858	Putative_R-Genes,_predicted_from_NCBI_UniGene	Medicago truncatula	NL	357472002	XM_003606238	Medicago truncatula NBS resistance protein (MTR_4g055630) mRNA, complete cds
Ghir_D03G017440	PRGDB00192324	61.2	165	47	3	2316	2804	1124	1273	3e-48	193.7	Mtr.12478	Putative_R-Genes,_predicted_from_NCBI_UniGene	Medicago truncatula	TNL	357500090	XM_003620286	Medicago truncatula Sucrose synthase (MTR_6g081120) mRNA, complete cds
Ghir_D03G017850.1	PRGDB00192324	55.7	194	56	5	2237	2773	1095	1273	1.1e-48	195.3	Mtr.12478	Putative_R-Genes,_predicted_from_NCBI_UniGene	Medicago truncatula	TNL	357500090	XM_003620286	Medicago truncatula Sucrose synthase (MTR_6g081120) mRNA, complete cds
Ghir_A05G017600	PRGDB00147216	76.4	365	86	0	480	1574	712	1076	2.4e-166	585.5	Bradi4g24910.1	Putative_R-Genes,_predicted_from_Pythozome	Ricinus communis	RLP			mitogen-activated protein kinase 1 (best arabidopsis hit); CGMC_MAPKCMGC_2_SLT2y_ERK.2 - CGMC includes CDA, MAPK, GSK3, and CLKC kinases, expressed (best rice hit)
Ghir_A07G005550	PRGDB00154239	75.2	1442	335	9	272	4531	1	1441	0	2092	orange1.1g000533m	Putative_R-Genes,_predicted_from_Pythozome	Citrus sinensis	N			mitogen-activated protein kinase kinase kinase 7 (best arabidopsis hit)
Ghir_A12G024890	PRGDB00182746	71.7	184	52	0	628	1179	1219	1402	9.2e-80	297.7	107342	Putative_R-Genes,_predicted_from_Pythozome	Ectocarpus siliculosus	N			mitogen-activated protein kinase kinase kinase 7 (best arabidopsis hit)
Ghir_A12G026140	PRGDB00182746	71.7	184	52	0	614	1165	1219	1402	8e-80	297.7	107342	Putative_R-Genes,_predicted_from_Pythozome	Ectocarpus siliculosus	N			mitogen-activated protein kinase kinase kinase 7 (best arabidopsis hit)
Ghir_A05G007950.1	PRGDB00145022	45.6	136	74	0	427	834	173	308	3e-27	123.2	AT1G51270.3	Putative_R-Genes,_predicted_from_Pythozome	Arabidopsis thaliana	T			MSP domain containing protein, expressed (best arabidopsis hit)
Ghir_A11G021960	PRGDB00177091	43.6	149	79	4	274	717	240	384	4e-25	116.3	POPTR_0818s00195.1	Putative_R-Genes,_predicted_from_Pythozome	Populus trichocarpa	T			NAC domain containing protein 17 (best arabidopsis hit)
Ghir_A11G022400	PRGDB00177091	41.9	129	71	3	422	805	240	365	1e-20	101.3	POPTR_0818s00195.1	Putative_R-Genes,_predicted_from_Pythozome	Populus trichocarpa	T			NAC domain containing protein 17 (best arabidopsis hit)
Ghir_A11G023020	PRGDB00177091	43.6	163	71	5	360	845	240	382	9.4e-28	125.2	POPTR_0818s00195.1	Putative_R-Genes,_predicted_from_Pythozome	Populus trichocarpa	T			NAC domain containing protein 17 (best arabidopsis hit)
Ghir_A11G023140	PRGDB00177091	41	117	58	3	400	723	244	358	7.4e-15	81.6	POPTR_0818s00195.1	Putative_R-Genes,_predicted_from_Pythozome	Populus trichocarpa	T			NAC domain containing protein 17 (best arabidopsis hit)
Ghir_A11G023430	PRGDB00177091	46.8	126	64	3	372	746	240	363	8.7e-25	114.8	POPTR_0818s00195.1	Putative_R-Genes,_predicted_from_Pythozome	Populus trichocarpa	T			NAC domain containing protein 17 (best arabidopsis hit)
Ghir_A12G009780	PRGDB00181635	30.2	139	86	4	274	663	11	147	8.2e-10	65.1	Si025833m	Putative_R-Genes,_predicted_from_Pythozome	Setaria italica	NL			NAC domain containing protein 90 (best arabidopsis hit); NBS-LRR disease resistance protein, putative, expressed (best rice hit)
Ghir_A12G009910	PRGDB00181635	39.4	170	86	5	234	695	13	181	1.4e-25	117.1	Si025833m	Putative_R-Genes,_predicted_from_Pythozome	Setaria italica	NL			NAC domain containing protein 90 (best arabidopsis hit); NBS-LRR disease resistance protein, putative, expressed (best rice hit)
Ghir_A12G010000	PRGDB00181635	55.4	177	73	3	66	593	11	182	2.7e-44	179.1	Si025833m	Putative_R-Genes,_predicted_from_Pythozome	Setaria italica	NL			NAC domain containing protein 90 (best arabidopsis hit); NBS-LRR disease resistance protein, putative, expressed (best rice hit)
Ghir_A12G012150	PRGDB00181635	52	171	79	3	52	558	14	183	3.7e-44	179.1	Si025833m	Putative_R-Genes,_predicted_from_Pythozome	Setaria italica	NL			NAC domain containing protein 90 (best arabidopsis hit); NBS-LRR disease resistance protein, putative, expressed (best rice hit)
Ghir_A12G012850	PRGDB00181635	49.2	130	60	4	353	724	13	142	1.3e-26	121.3	Si025833m	Putative_R-Genes,_predicted_from_Pythozome	Setaria italica	NL			NAC domain containing protein 90 (best arabidopsis hit); NBS-LRR disease resistance protein, putative, expressed (best rice hit)
Ghir_A12G013140	PRGDB00181635	55.4	177	73	3	16	543	11	182	3.2e-44	178.7	Si025833m	Putative_R-Genes,_predicted_from_Pythozome	Setaria italica	NL			NAC domain containing protein 90 (best arabidopsis hit); NBS-LRR disease resistance protein, putative, expressed (best rice hit)
Ghir_A12G015580	PRGDB00181635	55.6	133	57	2	128	523	14	145	1.3e-35	151	Si025833m	Putative_R-Genes,_predicted_from_Pythozome	Setaria italica	NL			NAC domain containing protein 90 (best arabidopsis hit); NBS-LRR disease resistance protein, putative, expressed (best rice hit)
Ghir_A12G015580.3	PRGDB00181635	52	173	76	4	128	634	14	183	1.1e-43	177.2	Si025833m	Putative_R-Genes,_predicted_from_Pythozome	Setaria italica	NL			NAC domain containing protein 90 (best arabidopsis hit); NBS-LRR disease resistance protein, putative, expressed (best rice hit)
Ghir_A12G015980	PRGDB00181635	49.2	130	60	4	379	750	13	142	1.2e-26	121.3	Si025833m	Putative_R-Genes,_predicted_from_Pythozome	Setaria italica	NL			NAC domain containing protein 90 (best arabidopsis hit); NBS-LRR disease resistance protein, putative, expressed (best rice hit)
Ghir_A04G014210	PRGDB00143254	52.5	59	28	0	900	1076	1	59	1.2e-08	63.2	891414	Putative_R-Genes,_predicted_from_Pythozome	Arabidopsis lyrata	CNL			NB-ARC domain-containing disease resistance protein (best arabidopsis hit)
Ghir_A04G014210.1	PRGDB00143254	52.5	59	28	0	900	1076	1	59	1.2e-08	63.2	891414	Putative_R-Genes,_predicted_from_Pythozome	Arabidopsis lyrata	CNL			NB-ARC domain-containing disease resistance protein (best arabidopsis hit)
Ghir_A05G026120	PRGDB00148393	42.6	1428	766	20	1	4164	1	1414	1.6e-289	995.7	clementine0.9_035928m	Putative_R-Genes,_predicted_from_Pythozome	Citrus clementina	CNL			NB-ARC domain-containing disease resistance protein (best arabidopsis hit)
Ghir_A05G027810.1	PRGDB00148403	36.2	58	37	0	1091	918	1384	1441	6.2e-07	55.5	clementine0.9_035959m	Putative_R-Genes,_predicted_from_Pythozome	Citrus clementina	CNL			NB-ARC domain-containing disease resistance protein (best arabidopsis hit)
Ghir_A05G028670.1	PRGDB00148403	22	277	200	5	1058	261	1384	1655	1.4e-11	70.9	clementine0.9_035959m	Putative_R-Genes,_predicted_from_Pythozome	Citrus clementina	CNL			NB-ARC domain-containing disease resistance protein (best arabidopsis hit)
Ghir_A05G028960	PRGDB00148403	30.4	112	77	1	473	141	1385	1496	3.3e-08	60.1	clementine0.9_035959m	Putative_R-Genes,_predicted_from_Pythozome	Citrus clementina	CNL			NB-ARC domain-containing disease resistance protein (best arabidopsis hit)
Ghir_A05G039650	PRGDB00149089	39.8	108	65	0	3886	3563	5	112	5.4e-12	74.3	clementine0.9_027677m	Putative_R-Genes,_predicted_from_Pythozome	Citrus clementina	CNL			NB-ARC domain-containing disease resistance protein (best arabidopsis hit)
Ghir_A06G001210.1	PRGDB00149355	68	125	40	0	906	1280	1446	1570	3.9e-43	176	clementine0.9_000252m	Putative_R-Genes,_predicted_from_Pythozome	Citrus clementina	CNL			NB-ARC domain-containing disease resistance protein (best arabidopsis hit)
Ghir_A06G001490	PRGDB00149355	65.6	125	43	0	588	962	1446	1570	6.1e-41	168.3	clementine0.9_000252m	Putative_R-Genes,_predicted_from_Pythozome	Citrus clementina	CNL			NB-ARC domain-containing disease resistance protein (best arabidopsis hit)
Ghir_A06G010300	PRGDB00149954	35.7	975	553	23	591	3350	16	971	5.5e-137	488.8	clementine0.9_001471m	Putative_R-Genes,_predicted_from_Pythozome	Citrus clementina	CNL			NB-ARC domain-containing disease resistance protein (best arabidopsis hit)
Ghir_A06G010850	PRGDB00149962	45	140	73	3	631	1047	6	142	3.6e-25	115.9	clementine0.9_033891m	Putative_R-Genes,_predicted_from_Pythozome	Citrus clementina	CNL			NB-ARC domain-containing disease resistance protein (best arabidopsis hit)
Ghir_A10G003430	PRGDB00149355	78.3	161	33	1	140	622	1418	1576	8e-70	265	clementine0.9_000252m	Putative_R-Genes,_predicted_from_Pythozome	Citrus clementina	CNL			NB-ARC domain-containing disease resistance protein (best arabidopsis hit)
Ghir_A11G026830	PRGDB00149355	68	125	40	0	906	1280	1446	1570	3.9e-43	176	clementine0.9_000252m	Putative_R-Genes,_predicted_from_Pythozome	Citrus clementina	CNL			NB-ARC domain-containing disease resistance protein (best arabidopsis hit)
Ghir_D07G023030	PRGDB00149355	69.6	125	38	0	585	959	1446	1570	1.3e-45	184.1	clementine0.9_000252m	Putative_R-Genes,_predicted_from_Pythozome	Citrus clementina	CNL			NB-ARC domain-containing disease resistance protein (best arabidopsis hit)
Ghir_D09G023550	PRGDB00149355	65.6	125	43	0	588	962	1446	1570	6.1e-41	168.3	clementine0.9_000252m	Putative_R-Genes,_predicted_from_Pythozome	Citrus clementina	CNL			NB-ARC domain-containing disease resistance protein (best arabidopsis hit)
Ghir_A05G030340	PRGDB00148455	78.1	32	7	0	457	552	942	973	6.5e-06	52.4	clementine0.9_032089m	Putative_R-Genes,_predicted_from_Pythozome	Citrus clementina	NL			NB-ARC domain-containing disease resistance protein (best arabidopsis hit)
Ghir_A05G031090	PRGDB00148455	78.1	32	7	0	459	554	942	973	6.7e-06	52.4	clementine0.9_032089m	Putative_R-Genes,_predicted_from_Pythozome	Citrus clementina	NL			NB-ARC domain-containing disease resistance protein (best arabidopsis hit)
Ghir_A06G001940	PRGDB00149372	52.2	901	411	6	1426	4089	428	1321	7.2e-264	910.6	clementine0.9_000539m	Putative_R-Genes,_predicted_from_Pythozome	Citrus clementina	NL			NB-ARC domain-containing disease resistance protein (best arabidopsis hit)
Ghir_A07G000810	PRGDB00152962	44.1	195	95	5	357	899	1	195	1e-32	141.7	orange1.1g002265m	Putative_R-Genes,_predicted_from_Pythozome	Citrus sinensis	CNL			NB-ARC domain-containing disease resistance protein (best arabidopsis hit)
Ghir_A07G007600.1	PRGDB00155168	38.8	947	501	18	132	2882	13	910	1.1e-161	570.5	orange1.1g036714m	Putative_R-Genes,_predicted_from_Pythozome	Citrus sinensis	CNL			NB-ARC domain-containing disease resistance protein (best arabidopsis hit)
Ghir_A07G013810	PRGDB00156340	49.8	683	293	9	3412	1430	189	843	1e-182	640.6	orange1.1g036168m	Putative_R-Genes,_predicted_from_Pythozome	Citrus sinensis	CNL			NB-ARC domain-containing disease resistance protein (best arabidopsis hit)
Ghir_A10G015710	PRGDB00155469	82.7	156	19	2	152	604	1454	1606	2.6e-71	268.5	orange1.1g000354m	Putative_R-Genes,_predicted_from_Pythozome	Citrus sinensis	CNL			NB-ARC domain-containing disease resistance protein (best arabidopsis hit)
Ghir_D05G015770	PRGDB00155469	76.4	157	31	2	264	728	1455	1607	2.9e-66	252.3	orange1.1g000354m	Putative_R-Genes,_predicted_from_Pythozome	Citrus sinensis	CNL			NB-ARC domain-containing disease resistance protein (best arabidopsis hit)
Ghir_A07G011050	PRGDB00155485	42.7	766	412	14	847	3099	14	767	4.1e-150	532.3	orange1.1g003435m	Putative_R-Genes,_predicted_from_Pythozome	Citrus sinensis	NL			NB-ARC domain-containing disease resistance protein (best arabidopsis hit)
Ghir_A09G010460	PRGDB00167217	44	75	41	1	300	524	964	1037	1.1e-10	68.2	mgv1a020513m	Putative_R-Genes,_predicted_from_Pythozome	Cucumis x hytivus	CNL			NB-ARC domain-containing disease resistance protein (best arabidopsis hit)
Ghir_A09G010710	PRGDB00167217	51.1	45	21	1	1592	1458	991	1034	3.5e-06	53.1	mgv1a020513m	Putative_R-Genes,_predicted_from_Pythozome	Cucumis x hytivus	CNL			NB-ARC domain-containing disease resistance protein (best arabidopsis hit)
Ghir_A09G010820	PRGDB00167217	45.6	90	48	1	1822	1553	949	1037	2.3e-14	81.3	mgv1a020513m	Putative_R-Genes,_predicted_from_Pythozome	Cucumis x hytivus	CNL			NB-ARC domain-containing disease resistance protein (best arabidopsis hit)
Ghir_A09G011150	PRGDB00167217	48.6	70	35	1	1414	1205	969	1037	5.9e-12	72	mgv1a020513m	Putative_R-Genes,_predicted_from_Pythozome	Cucumis x hytivus	CNL			NB-ARC domain-containing disease resistance protein (best arabidopsis hit)
Ghir_A09G011180	PRGDB00167217	43.3	90	50	1	1579	1310	949	1037	1.6e-13	77.4	mgv1a020513m	Putative_R-Genes,_predicted_from_Pythozome	Cucumis x hytivus	CNL			NB-ARC domain-containing disease resistance protein (best arabidopsis hit)
Ghir_A09G011710	PRGDB00167217	39.7	68	40	1	1912	1709	972	1038	2.4e-08	60.5	mgv1a020513m	Putative_R-Genes,_predicted_from_Pythozome	Cucumis x hytivus	CNL			NB-ARC domain-containing disease resistance protein (best arabidopsis hit)
Ghir_A08G019060	PRGDB00165191	49.7	157	79	0	362	832	794	950	1e-41	170.6	mgv1a000858m	Putative_R-Genes,_predicted_from_Pythozome	Cucumis x hytivus	NL			NB-ARC domain-containing disease resistance protein (best arabidopsis hit)
Ghir_A08G021030	PRGDB00165191	33.5	194	109	4	833	1360	758	949	1e-21	104.8	mgv1a000858m	Putative_R-Genes,_predicted_from_Pythozome	Cucumis x hytivus	NL			NB-ARC domain-containing disease resistance protein (best arabidopsis hit)
Ghir_A08G001170	PRGDB00159800	46.8	950	470	14	410	3202	3	936	7.4e-236	817.4	Glyma08g12990.1	Putative_R-Genes,_predicted_from_Pythozome	Glycine max	CNL			NB-ARC domain-containing disease resistance protein (best arabidopsis hit)
Ghir_A11G002860.1	PRGDB00176340	29.9	137	64	3	795	1205	17	121	7.3e-06	52.8	29706.m001347	Putative_R-Genes,_predicted_from_Pythozome	Oryza barthii	NL			NB-ARC domain-containing disease resistance protein (best arabidopsis hit)
Ghir_A11G029090	PRGDB00177620	36.1	61	39	0	269	451	18	78	0.00027	49.3	30128.m008690	Putative_R-Genes,_predicted_from_Pythozome	Oryza barthii	NL			NB-ARC domain-containing disease resistance protein (best arabidopsis hit)
Ghir_A11G025030.2	PRGDB00177143	30.5	82	45	2	186	431	797	866	0.58	35.8	POPTR_0001s47840.1	Putative_R-Genes,_predicted_from_Pythozome	Populus trichocarpa	CNL			NB-ARC domain-containing disease resistance protein (best arabidopsis hit)
Ghir_A11G027900	PRGDB00177506	42.4	184	99	2	85	618	1195	1377	6.2e-29	127.5	POPTR_0001s42440.1	Putative_R-Genes,_predicted_from_Pythozome	Populus trichocarpa	CNL			NB-ARC domain-containing disease resistance protein (best arabidopsis hit)
Ghir_A10G020930	PRGDB00175440	44	75	39	2	1026	1247	1111	1183	1.9e-09	63.9	POPTR_0019s03700.1	Putative_R-Genes,_predicted_from_Pythozome	Populus trichocarpa	NL			NB-ARC domain-containing disease resistance protein (best arabidopsis hit)
Ghir_A10G006340.1	PRGDB00173873	43.6	948	508	13	82	2889	1	933	8.2e-202	704.1	ppa001015m	Putative_R-Genes,_predicted_from_Pythozome	Prunus persica	NL			NB-ARC domain-containing disease resistance protein (best arabidopsis hit)
Ghir_A08G011570	PRGDB00162922	54.3	453	198	4	17	1360	1	449	5.2e-127	455.7	cassava4.1_028995m	Putative_R-Genes,_predicted_from_Pythozome	Vitis aestivalis	CNL			NB-ARC domain-containing disease resistance protein (best arabidopsis hit)
Ghir_A08G026250	PRGDB00165841	49.3	538	263	6	101	1711	1	529	5.4e-142	505.8	cassava4.1_023508m	Putative_R-Genes,_predicted_from_Pythozome	Vitis aestivalis	CNL			NB-ARC domain-containing disease resistance protein (best arabidopsis hit)
Ghir_A08G026300	PRGDB00165841	49.3	538	263	6	4517	2907	1	529	5.2e-142	505.8	cassava4.1_023508m	Putative_R-Genes,_predicted_from_Pythozome	Vitis aestivalis	CNL			NB-ARC domain-containing disease resistance protein (best arabidopsis hit)
Ghir_A08G008340	PRGDB00162138	47	1359	656	14	555	4604	29	1332	0	1170.2	cassava4.1_032626m	Putative_R-Genes,_predicted_from_Pythozome	Vitis aestivalis	NL			NB-ARC domain-containing disease resistance protein (best arabidopsis hit)
Ghir_D01G011960	PRGDB00184523	40.1	147	73	6	4095	3661	924	1057	5e-19	97.1	GSVIVT01037631001	Putative_R-Genes,_predicted_from_Pythozome	Vitis vinifera	CNL			NB-ARC domain-containing disease resistance protein (best arabidopsis hit)
Ghir_A13G022910.1	PRGDB00183702	75.4	57	14	0	1298	1468	1247	1303	3e-19	96.7	GSVIVT01023015001	Putative_R-Genes,_predicted_from_Pythozome	Vitis vinifera	NL			NB-ARC domain-containing disease resistance protein (best arabidopsis hit)
Ghir_D01G017410	PRGDB00186217	25.9	305	194	6	286	1173	1491	1772	2e-17	90.1	GRMZM2G381429_T01	Putative_R-Genes,_predicted_from_Pythozome	Zea mays	NL			NB-ARC domain-containing disease resistance protein (best arabidopsis hit); resistance protein, putative, expressed (best rice hit)
Ghir_D01G018310	PRGDB00186217	26.6	320	185	8	491	1414	1491	1772	4.9e-22	105.5	GRMZM2G381429_T01	Putative_R-Genes,_predicted_from_Pythozome	Zea mays	NL			NB-ARC domain-containing disease resistance protein (best arabidopsis hit); resistance protein, putative, expressed (best rice hit)
Ghir_D01G018750	PRGDB00186217	35.5	62	40	0	1560	1745	1491	1552	2.7e-07	57.8	GRMZM2G381429_T01	Putative_R-Genes,_predicted_from_Pythozome	Zea mays	NL			NB-ARC domain-containing disease resistance protein (best arabidopsis hit); resistance protein, putative, expressed (best rice hit)
Ghir_D01G018970	PRGDB00186217	29.5	129	85	1	252	620	1491	1619	1.3e-11	72.4	GRMZM2G381429_T01	Putative_R-Genes,_predicted_from_Pythozome	Zea mays	NL			NB-ARC domain-containing disease resistance protein (best arabidopsis hit); resistance protein, putative, expressed (best rice hit)
Ghir_A12G017470	PRGDB00181917	36.5	96	51	1	349	636	1119	1204	7.7e-11	68.2	Si028710m	Putative_R-Genes,_predicted_from_Pythozome	Setaria italica	NL			NB-ARC domain-containing disease resistance protein (best arabidopsis hit); RGH2B, putative, expressed (best rice hit)
Ghir_A12G017840	PRGDB00181917	33.9	112	64	2	552	887	1104	1205	2.2e-10	67	Si028710m	Putative_R-Genes,_predicted_from_Pythozome	Setaria italica	NL			NB-ARC domain-containing disease resistance protein (best arabidopsis hit); RGH2B, putative, expressed (best rice hit)
Ghir_A04G011460	PRGDB00080675	32.4	105	61	4	2165	2452	34	137	6.7e-06	53.1	Ncr.24266	Putative_R-Genes,_predicted_from_NCBI_UniGene	Physcomitrella patens subsp. patens	N	85119617	XM_960582	Neurospora crassa OR74A hypothetical protein NCU02544 partial mRNA
Ghir_A09G001460	PRGDB00165908	82.6	626	108	1	472	2349	1	625	2.1e-303	1041.2	cassava4.1_003667m	Putative_R-Genes,_predicted_from_Pythozome	Vitis aestivalis	RLP			NSP-interacting kinase 1 (best arabidopsis hit)
Ghir_A06G015410	PRGDB00150470	74	619	160	1	357	2210	10	628	4.3e-258	890.6	evm.model.supercontig_53.14	Putative_R-Genes,_predicted_from_Pythozome	Arabidopsis lyrata subsp. lyrata	RLP			NSP-interacting kinase 2 (best arabidopsis hit)
Ghir_A09G007770	PRGDB00166449	84.7	622	93	1	1071	2936	8	627	3.7e-304	1043.9	cassava4.1_003643m	Putative_R-Genes,_predicted_from_Pythozome	Vitis aestivalis	RLP			NSP-interacting kinase 3 (best arabidopsis hit)
BGI_novel_G001248	PRGDB00049879	30.6	196	105	3	395	922	2644	2828	5.4e-16	85.9	Os11g0686400	Putative_R-Genes,_collected_from_NCBI_Protein	Oryza sativa Japonica Group	CNL	115486666	NM_001075009	Oryza sativa (japonica cultivar-group) Os11g0686400 (Os11g0686400) mRNA, complete cds.
Ghir_A01G015890	PRGDB00073072	26.9	294	179	8	1536	2396	381	645	8e-16	85.9	Os.80143	Putative_R-Genes,_predicted_from_NCBI_UniGene	Oryza sativa Japonica Group	CNL	32975074	AK065056	Oryza sativa Japonica Group cDNA clone:J013001J06, full insert sequence
Ghir_A01G016010	PRGDB00073072	45.4	599	303	5	527	2254	61	658	5.6e-140	498.4	Os.80143	Putative_R-Genes,_predicted_from_NCBI_UniGene	Oryza sativa Japonica Group	CNL	32975074	AK065056	Oryza sativa Japonica Group cDNA clone:J013001J06, full insert sequence
Ghir_A01G016720	PRGDB00073072	26.8	123	87	3	1086	1454	495	614	0.0025	44.3	Os.80143	Putative_R-Genes,_predicted_from_NCBI_UniGene	Oryza sativa Japonica Group	CNL	32975074	AK065056	Oryza sativa Japonica Group cDNA clone:J013001J06, full insert sequence
Ghir_A01G017230	PRGDB00073072	43.4	53	26	3	775	927	562	612	42	30	Os.80143	Putative_R-Genes,_predicted_from_NCBI_UniGene	Oryza sativa Japonica Group	CNL	32975074	AK065056	Oryza sativa Japonica Group cDNA clone:J013001J06, full insert sequence
Ghir_A01G018380	PRGDB00073072	45.9	593	302	4	172	1896	62	653	6.3e-145	514.2	Os.80143	Putative_R-Genes,_predicted_from_NCBI_UniGene	Oryza sativa Japonica Group	CNL	32975074	AK065056	Oryza sativa Japonica Group cDNA clone:J013001J06, full insert sequence
Ghir_A01G019410	PRGDB00073072	32.7	101	64	3	262	561	193	290	8.1e-07	53.9	Os.80143	Putative_R-Genes,_predicted_from_NCBI_UniGene	Oryza sativa Japonica Group	CNL	32975074	AK065056	Oryza sativa Japonica Group cDNA clone:J013001J06, full insert sequence
Ghir_A01G019500	PRGDB00073072	28.8	281	162	7	484	1308	392	640	3.6e-15	83.2	Os.80143	Putative_R-Genes,_predicted_from_NCBI_UniGene	Oryza sativa Japonica Group	CNL	32975074	AK065056	Oryza sativa Japonica Group cDNA clone:J013001J06, full insert sequence
Ghir_A01G010940	PRGDB00072495	39.5	129	73	2	308	688	39	164	5e-16	85.9	Os.49600	Putative_R-Genes,_predicted_from_NCBI_UniGene	Oryza sativa Japonica Group	RLP	32976136	AK066118	Oryza sativa Japonica Group cDNA clone:J013055F13, full insert sequence
BGI_novel_G003083	PRGDB00062348	33.3	93	61	1	3571	3849	163	254	4e-09	64.3	E3 ligase	Putative_R-Genes,_collected_from_NCBI_Protein	Oryza sativa Japonica Group	N	324029070	HQ123581	Oryza sativa Japonica Group cultivar Taipei 309 E3 ligase (BBI1) mRNA, complete cds.
BGI_novel_G003108	PRGDB00062348	36.6	93	57	2	4265	4540	163	254	2e-09	65.5	E3 ligase	Putative_R-Genes,_collected_from_NCBI_Protein	Oryza sativa Japonica Group	N	324029070	HQ123581	Oryza sativa Japonica Group cultivar Taipei 309 E3 ligase (BBI1) mRNA, complete cds.
Ghir_A01G019790	PRGDB00073207	38.9	149	90	1	520	966	687	834	2.7e-25	117.9	Os.86222	Putative_R-Genes,_predicted_from_NCBI_UniGene	Oryza sativa Japonica Group	NL	115485442	NM_001074397	Oryza sativa Japonica Group Os11g0462900 (Os11g0462900) mRNA, complete cds
Ghir_A01G020240	PRGDB00073207	46.8	573	289	7	290	1975	691	1258	1.1e-138	493.8	Os.86222	Putative_R-Genes,_predicted_from_NCBI_UniGene	Oryza sativa Japonica Group	NL	115485442	NM_001074397	Oryza sativa Japonica Group Os11g0462900 (Os11g0462900) mRNA, complete cds
Ghir_A12G002030	PRGDB00178497	58.7	1098	438	5	1468	4737	24	1114	0	1260	POPTR_0008s00970.1	Putative_R-Genes,_predicted_from_Pythozome	Populus trichocarpa	RLP			PEP1 receptor 1 (best arabidopsis hit)
Ghir_A09G012580	PRGDB00167562	47.4	192	101	0	1584	2159	444	635	1e-45	185.7	Medtr1g118320.1	Putative_R-Genes,_predicted_from_Pythozome	Medicago truncatula	CN			phosphoenolpyruvate carboxylase 4 (best arabidopsis hit)
Ghir_A09G012580.1	PRGDB00167562	47.9	192	99	1	1668	2240	444	635	6.6e-44	179.5	Medtr1g118320.1	Putative_R-Genes,_predicted_from_Pythozome	Medicago truncatula	CN			phosphoenolpyruvate carboxylase 4 (best arabidopsis hit)
Ghir_D04G015830.1	PRGDB00194209	34	94	58	3	421	699	1508	1598	1.6e-06	55.1	Pin.5041	Putative_R-Genes,_predicted_from_NCBI_UniGene	Phytophthora infestans	N	301091447	XM_002895863	Phytophthora infestans T30-4 ATP-binding Cassette (ABC) Superfamily (PITG_20239) mRNA, complete cds
Ghir_D01G008840	PRGDB00184336	39.3	89	51	2	4	261	548	636	7.1e-10	65.1	GSVIVT01034745001	Putative_R-Genes,_predicted_from_Pythozome	Vitis vinifera	N			pleiotropic drug resistance 11 (best arabidopsis hit)
Ghir_A12G018540	PRGDB00182255	35.7	185	87	2	1200	1754	1517	1669	7e-25	116.3	441722	Putative_R-Genes,_predicted_from_Pythozome	Selaginella moellendorffii	N			pleiotropic drug resistance 12 (best arabidopsis hit)
Ghir_A12G018650.1	PRGDB00182255	27.3	187	101	5	1414	1974	1517	1668	7.2e-06	53.5	441722	Putative_R-Genes,_predicted_from_Pythozome	Selaginella moellendorffii	N			pleiotropic drug resistance 12 (best arabidopsis hit)
Ghir_A12G018860	PRGDB00182255	37.4	182	82	3	1210	1755	1520	1669	1.5e-20	102.1	441722	Putative_R-Genes,_predicted_from_Pythozome	Selaginella moellendorffii	N			pleiotropic drug resistance 12 (best arabidopsis hit)
Ghir_A12G018860.3	PRGDB00182255	37.3	185	84	2	1320	1874	1517	1669	7.4e-26	119.4	441722	Putative_R-Genes,_predicted_from_Pythozome	Selaginella moellendorffii	N			pleiotropic drug resistance 12 (best arabidopsis hit)
Ghir_A12G018870	PRGDB00182255	38.5	182	81	3	760	1305	1519	1669	3.8e-25	116.7	441722	Putative_R-Genes,_predicted_from_Pythozome	Selaginella moellendorffii	N			pleiotropic drug resistance 12 (best arabidopsis hit)
Ghir_A12G021740	PRGDB00182255	37.1	202	91	5	1009	1602	1500	1669	3.5e-21	104	441722	Putative_R-Genes,_predicted_from_Pythozome	Selaginella moellendorffii	N			pleiotropic drug resistance 12 (best arabidopsis hit)
Ghir_A12G022770	PRGDB00182255	29.8	191	90	11	649	1203	1525	1677	3.4e-07	56.6	441722	Putative_R-Genes,_predicted_from_Pythozome	Selaginella moellendorffii	N			pleiotropic drug resistance 12 (best arabidopsis hit)
Ghir_A12G023430.1	PRGDB00182255	51.6	250	91	6	958	1704	1449	1669	9.5e-56	218.8	441722	Putative_R-Genes,_predicted_from_Pythozome	Selaginella moellendorffii	N			pleiotropic drug resistance 12 (best arabidopsis hit)
Ghir_A12G023820	PRGDB00182366	58	50	21	0	980	1129	1695	1744	1.6e-07	58.2	412710	Putative_R-Genes,_predicted_from_Pythozome	Selaginella moellendorffii	N			pleiotropic drug resistance 12 (best arabidopsis hit)
Ghir_A13G015510	PRGDB00183352	24.6	171	122	4	805	1305	1581	1748	1.7e-08	60.8	GSVIVT01015461001	Putative_R-Genes,_predicted_from_Pythozome	Vitis vinifera	N			pleiotropic drug resistance 12 (best arabidopsis hit)
BGI_novel_G003462	PRGDB00062906	43.4	1431	746	18	211	4365	5	1417	0	1087	cc-nbs-lrr resistance protein	Putative_R-Genes,_collected_from_NCBI_Protein	Populus trichocarpa	NL	224059583	XM_002299883	Populus trichocarpa cc-nbs-lrr resistance protein, mRNA.
BGI_novel_G000653	PRGDB00047409	56.3	71	30	1	212	3	92	162	1e-15	85.1	TIR-NBS-LRR-TIR type disease resistance protein	Putative_R-Genes,_collected_from_NCBI_Protein	Populus trichocarpa	TNL	105922556	DQ513209	Populus trichocarpa clone 110301 TIR-NBS-LRR-TIR type disease resistance protein mRNA, partial cds.
Ghir_A02G002070	PRGDB00075483	60.9	46	18	0	4	141	8	53	1.7e-09	63.5	Pth.17643	Putative_R-Genes,_predicted_from_NCBI_UniGene	Populus trichocarpa	N	105922962	DQ513233	Populus trichocarpa clone 177919 NBS type disease resistance protein mRNA, complete cds
BGI_novel_G000535	PRGDB00047400	55	120	44	2	357	716	1050	1159	1.9e-29	130.2	TIR-NBS-TIR-TIR-WRKY type disease resistance protein	Putative_R-Genes,_collected_from_NCBI_Protein	Populus trichocarpa	TNL	105922709	DQ513218	Populus trichocarpa clone 196822 TIR-NBS-TIR-TIR-WRKY type disease resistance protein mRNA, complete cds.
BGI_novel_G000588	PRGDB00047400	58	88	37	0	557	820	1050	1137	9.9e-25	114.8	TIR-NBS-TIR-TIR-WRKY type disease resistance protein	Putative_R-Genes,_collected_from_NCBI_Protein	Populus trichocarpa	TNL	105922709	DQ513218	Populus trichocarpa clone 196822 TIR-NBS-TIR-TIR-WRKY type disease resistance protein mRNA, complete cds.
BGI_novel_G003216	PRGDB00062544	66.7	54	18	0	1208	1369	991	1044	2.5e-13	77	cc-nbs-lrr resistance protein	Putative_R-Genes,_collected_from_NCBI_Protein	Populus trichocarpa	NL	116047840	CM000338	Populus trichocarpa linkage group II, whole genome shotgun sequence.
BGI_novel_G003112	PRGDB00062390	56.6	465	198	4	858	2252	376	836	9.6e-145	513.8	nbs-lrr resistance protein	Putative_R-Genes,_collected_from_NCBI_Protein	Populus trichocarpa	CNL	116047835	CM000343	Populus trichocarpa linkage group VII, whole genome shotgun sequence.
BGI_novel_G003127	PRGDB00062496	27.8	194	104	6	704	1246	554	724	0.00086	45.8	tir-nbs-lrr resistance protein	Putative_R-Genes,_collected_from_NCBI_Protein	Populus trichocarpa	TNL	116047823	CM000355	Populus trichocarpa linkage group XIX, whole genome shotgun sequence.
BGI_novel_G003406	PRGDB00062642	57	949	360	8	5469	2668	1	916	1.3e-299	1029.6	nbs-lrr resistance protein	Putative_R-Genes,_collected_from_NCBI_Protein	Populus trichocarpa	NL	224138291	XM_002326530	Populus trichocarpa nbs-lrr resistance protein, mRNA.
Ghir_A12G005780	PRGDB00178930	50.9	212	93	5	121	729	24	233	5.2e-60	232.3	Sb03g008160.1	Putative_R-Genes,_predicted_from_Pythozome	Sorghum bicolor	Other			PR5-like receptor kinase (best arabidopsis hit); expressed protein (best rice hit)
Ghir_D01G020910	PRGDB00186618	49.3	73	34	1	348	557	32	104	1.2e-10	67.4		Putative_R-Genes,_collected_from_NCBI_Protein	Brachypodium distachyon	NL	357127893	XM_003565564	PREDICTED: Brachypodium distachyon disease resistance protein RPH8A-like (LOC100842838), mRNA.
Ghir_D02G007280	PRGDB00188495	42.1	171	99	0	283	795	2	172	2e-36	152.9	Gma.21750	Putative_R-Genes,_predicted_from_NCBI_UniGene	Glycine max	RLK-GNK2	356534245	XM_003535620	PREDICTED: Glycine max cysteine-rich receptor-like protein kinase 29-like (LOC100791056), mRNA
Ghir_D02G007240	PRGDB00188448	50.8	246	110	4	1370	2101	61	297	8e-61	235.7	Gma.19334	Putative_R-Genes,_predicted_from_NCBI_UniGene	Glycine max	NL	356567183	XM_003551753	PREDICTED: Glycine max probable disease resistance protein At4g27220-like (LOC100788065), mRNA
Ghir_D02G007070	PRGDB00188415	50.3	710	291	13	623	2749	5	653	7e-175	614.4	Gma.18451	Putative_R-Genes,_predicted_from_NCBI_UniGene	Glycine max	RLP	356528327	XM_003532708	PREDICTED: Glycine max probable LRR receptor-like serine
Ghir_D09G019100.1	PRGDB00189168	33.2	244	153	5	673	1401	66	300	5.4e-33	143.3	Gma.63188	Putative_R-Genes,_predicted_from_NCBI_UniGene	Glycine max	RLP	356523477	XM_003530317	PREDICTED: Glycine max protein STRUBBELIG-RECEPTOR FAMILY 5-like (LOC100785529), mRNA
Ghir_A04G011040	PRGDB00079121	40.2	82	48	1	459	214	7	87	4.4e-07	55.8	Vvi.25979	Putative_R-Genes,_predicted_from_NCBI_UniGene	Vitis vinifera	RLP	225442382	XM_002276677	PREDICTED: Vitis vinifera hypothetical protein LOC100242932 (LOC100242932), mRNA
Ghir_A04G000480	PRGDB00079067	34.9	421	246	9	288	1502	919	1327	1.5e-55	217.2	Vvi.24747	Putative_R-Genes,_predicted_from_NCBI_UniGene	Vitis vinifera	NL	225424433	XM_002281516	PREDICTED: Vitis vinifera hypothetical protein LOC100249092 (LOC100249092), mRNA
Ghir_A04G000880	PRGDB00079067	28.6	339	220	8	588	1556	935	1267	2.4e-27	123.6	Vvi.24747	Putative_R-Genes,_predicted_from_NCBI_UniGene	Vitis vinifera	NL	225424433	XM_002281516	PREDICTED: Vitis vinifera hypothetical protein LOC100249092 (LOC100249092), mRNA
Ghir_A04G002790	PRGDB00079067	31.9	411	261	10	243	1439	935	1338	3.2e-45	182.6	Vvi.24747	Putative_R-Genes,_predicted_from_NCBI_UniGene	Vitis vinifera	NL	225424433	XM_002281516	PREDICTED: Vitis vinifera hypothetical protein LOC100249092 (LOC100249092), mRNA
Ghir_A04G002790.1	PRGDB00079067	38.5	96	59	0	1051	1338	922	1017	2e-13	78.2	Vvi.24747	Putative_R-Genes,_predicted_from_NCBI_UniGene	Vitis vinifera	NL	225424433	XM_002281516	PREDICTED: Vitis vinifera hypothetical protein LOC100249092 (LOC100249092), mRNA
Ghir_A04G008940	PRGDB00079067	29.3	392	251	7	1051	2151	940	1330	7.3e-34	146	Vvi.24747	Putative_R-Genes,_predicted_from_NCBI_UniGene	Vitis vinifera	NL	225424433	XM_002281516	PREDICTED: Vitis vinifera hypothetical protein LOC100249092 (LOC100249092), mRNA
Ghir_A02G009260	PRGDB00078682	54.6	152	59	3	691	1119	707	857	8.1e-38	159.1	Vvi.8276	Putative_R-Genes,_predicted_from_NCBI_UniGene	Vitis vinifera	NL	225452519	XM_002275052	PREDICTED: Vitis vinifera hypothetical protein LOC100250803 (LOC100250803), mRNA
Ghir_A02G010300	PRGDB00078682	44.9	69	37	1	727	930	780	848	1e-13	78.2	Vvi.8276	Putative_R-Genes,_predicted_from_NCBI_UniGene	Vitis vinifera	NL	225452519	XM_002275052	PREDICTED: Vitis vinifera hypothetical protein LOC100250803 (LOC100250803), mRNA
Ghir_A02G010420	PRGDB00078682	41.4	70	38	2	808	1008	783	852	1.4e-07	57.8	Vvi.8276	Putative_R-Genes,_predicted_from_NCBI_UniGene	Vitis vinifera	NL	225452519	XM_002275052	PREDICTED: Vitis vinifera hypothetical protein LOC100250803 (LOC100250803), mRNA
BGI_novel_G002766	PRGDB00079096	45.9	170	87	2	131	637	10	175	1.6e-33	145.6	Vvi.25563	Putative_R-Genes,_predicted_from_NCBI_UniGene	Vitis vinifera	CNL	225460216	XM_002277805	PREDICTED: Vitis vinifera hypothetical protein LOC100251634 (LOC100251634), mRNA
Ghir_A03G016080	PRGDB00078970	51.9	320	146	5	1080	2027	1046	1361	8.4e-92	338.6	Vvi.20745	Putative_R-Genes,_predicted_from_NCBI_UniGene	Vitis vinifera	CNL	225447515	XM_002268092	PREDICTED: Vitis vinifera hypothetical protein LOC100252764 (LOC100252764), mRNA
Ghir_A03G017520	PRGDB00078970	31	248	154	5	1049	1777	1120	1355	2.5e-24	114.4	Vvi.20745	Putative_R-Genes,_predicted_from_NCBI_UniGene	Vitis vinifera	CNL	225447515	XM_002268092	PREDICTED: Vitis vinifera hypothetical protein LOC100252764 (LOC100252764), mRNA
Ghir_A03G018820	PRGDB00078970	30.1	256	168	4	534	1289	1113	1361	1.9e-24	114	Vvi.20745	Putative_R-Genes,_predicted_from_NCBI_UniGene	Vitis vinifera	CNL	225447515	XM_002268092	PREDICTED: Vitis vinifera hypothetical protein LOC100252764 (LOC100252764), mRNA
Ghir_A03G020430	PRGDB00078970	32.8	332	199	5	669	1652	1068	1379	2.4e-36	154.5	Vvi.20745	Putative_R-Genes,_predicted_from_NCBI_UniGene	Vitis vinifera	CNL	225447515	XM_002268092	PREDICTED: Vitis vinifera hypothetical protein LOC100252764 (LOC100252764), mRNA
Ghir_A02G006680	PRGDB00078600	42.9	70	40	0	1838	1629	432	501	6.4e-05	49.3	Vvi.5127	Putative_R-Genes,_predicted_from_NCBI_UniGene	Vitis vinifera	RLK	225449666	XM_002264215	PREDICTED: Vitis vinifera hypothetical protein LOC100253963 (LOC100253963), mRNA
Ghir_A02G004720	PRGDB00078552	63.3	49	18	0	1449	1595	451	499	4.2e-10	66.6	Vvi.2206	Putative_R-Genes,_predicted_from_NCBI_UniGene	Vitis vinifera	RLK-GNK2	225427582	XM_002267880	PREDICTED: Vitis vinifera hypothetical protein LOC100257888 (LOC100257888), mRNA
Ghir_A03G022610	PRGDB00079040	50	50	25	0	289	438	8	57	5.1e-06	53.1	Vvi.23988	Putative_R-Genes,_predicted_from_NCBI_UniGene	Vitis vinifera	RLP	225442062	XM_002272327	PREDICTED: Vitis vinifera hypothetical protein LOC100260039 (LOC100260039), mRNA
Ghir_A03G022690.1	PRGDB00079040	39.9	143	72	4	352	747	1	140	9.9e-18	91.7	Vvi.23988	Putative_R-Genes,_predicted_from_NCBI_UniGene	Vitis vinifera	RLP	225442062	XM_002272327	PREDICTED: Vitis vinifera hypothetical protein LOC100260039 (LOC100260039), mRNA
Ghir_A03G011000	PRGDB00078883	35.9	198	120	3	1902	2483	242	436	1.4e-25	118.2	Vvi.16557	Putative_R-Genes,_predicted_from_NCBI_UniGene	Vitis vinifera	RLP	225441697	XM_002277255	PREDICTED: Vitis vinifera hypothetical protein LOC100262317 (LOC100262317), mRNA
Ghir_A03G011390	PRGDB00078883	34.9	295	187	2	1795	920	177	469	2e-40	168.7	Vvi.16557	Putative_R-Genes,_predicted_from_NCBI_UniGene	Vitis vinifera	RLP	225441697	XM_002277255	PREDICTED: Vitis vinifera hypothetical protein LOC100262317 (LOC100262317), mRNA
Ghir_A02G016290	PRGDB00078803	30.3	198	122	4	2235	2786	391	586	4.2e-15	84.3	Vvi.12916	Putative_R-Genes,_predicted_from_NCBI_UniGene	Vitis vinifera	N	225452756	XM_002283015	PREDICTED: Vitis vinifera hypothetical protein LOC100262734 (LOC100262734), mRNA
Ghir_A02G016300	PRGDB00078803	30.3	198	122	4	2089	2640	391	586	4.1e-15	84.3	Vvi.12916	Putative_R-Genes,_predicted_from_NCBI_UniGene	Vitis vinifera	N	225452756	XM_002283015	PREDICTED: Vitis vinifera hypothetical protein LOC100262734 (LOC100262734), mRNA
Ghir_A02G017120	PRGDB00078803	86.9	1247	160	1	434	4165	7	1253	0	2084.3	Vvi.12916	Putative_R-Genes,_predicted_from_NCBI_UniGene	Vitis vinifera	N	225452756	XM_002283015	PREDICTED: Vitis vinifera hypothetical protein LOC100262734 (LOC100262734), mRNA
Ghir_A02G018380	PRGDB00078803	87.7	1247	150	1	355	4086	7	1253	0	2103.6	Vvi.12916	Putative_R-Genes,_predicted_from_NCBI_UniGene	Vitis vinifera	N	225452756	XM_002283015	PREDICTED: Vitis vinifera hypothetical protein LOC100262734 (LOC100262734), mRNA
Ghir_A02G018420.1	PRGDB00078803	30.1	229	145	3	1831	2475	370	597	9.8e-21	102.8	Vvi.12916	Putative_R-Genes,_predicted_from_NCBI_UniGene	Vitis vinifera	N	225452756	XM_002283015	PREDICTED: Vitis vinifera hypothetical protein LOC100262734 (LOC100262734), mRNA
Ghir_A02G019190	PRGDB00078803	48.2	357	182	2	335	1396	227	583	5.7e-90	332.8	Vvi.12916	Putative_R-Genes,_predicted_from_NCBI_UniGene	Vitis vinifera	N	225452756	XM_002283015	PREDICTED: Vitis vinifera hypothetical protein LOC100262734 (LOC100262734), mRNA
Ghir_A02G019450	PRGDB00078803	28.1	253	179	3	4654	5403	334	586	5.9e-24	114	Vvi.12916	Putative_R-Genes,_predicted_from_NCBI_UniGene	Vitis vinifera	N	225452756	XM_002283015	PREDICTED: Vitis vinifera hypothetical protein LOC100262734 (LOC100262734), mRNA
Ghir_A02G019450.1	PRGDB00078803	27	370	229	8	1882	2928	924	1273	4.9e-24	114	Vvi.12916	Putative_R-Genes,_predicted_from_NCBI_UniGene	Vitis vinifera	N	225452756	XM_002283015	PREDICTED: Vitis vinifera hypothetical protein LOC100262734 (LOC100262734), mRNA
Ghir_A03G000050	PRGDB00078803	29.6	223	133	5	1843	2457	363	579	3.1e-20	101.3	Vvi.12916	Putative_R-Genes,_predicted_from_NCBI_UniGene	Vitis vinifera	N	225452756	XM_002283015	PREDICTED: Vitis vinifera hypothetical protein LOC100262734 (LOC100262734), mRNA
Ghir_A03G001980	PRGDB00078803	31.2	215	130	4	2226	2825	1030	1241	7.3e-18	93.6	Vvi.12916	Putative_R-Genes,_predicted_from_NCBI_UniGene	Vitis vinifera	N	225452756	XM_002283015	PREDICTED: Vitis vinifera hypothetical protein LOC100262734 (LOC100262734), mRNA
Ghir_A03G002380.1	PRGDB00078803	31.7	63	41	1	423	611	24	84	0.0023	45.4	Vvi.12916	Putative_R-Genes,_predicted_from_NCBI_UniGene	Vitis vinifera	N	225452756	XM_002283015	PREDICTED: Vitis vinifera hypothetical protein LOC100262734 (LOC100262734), mRNA
Ghir_A03G002820	PRGDB00078803	30.6	229	150	4	3571	4239	361	586	4.3e-21	104	Vvi.12916	Putative_R-Genes,_predicted_from_NCBI_UniGene	Vitis vinifera	N	225452756	XM_002283015	PREDICTED: Vitis vinifera hypothetical protein LOC100262734 (LOC100262734), mRNA
Ghir_D04G006540.2	PRGDB00078803	31.7	63	41	1	423	611	24	84	0.0023	45.4	Vvi.12916	Putative_R-Genes,_predicted_from_NCBI_UniGene	Vitis vinifera	N	225452756	XM_002283015	PREDICTED: Vitis vinifera hypothetical protein LOC100262734 (LOC100262734), mRNA
Ghir_D07G023420	PRGDB00078803	42.5	1246	704	10	226	3951	18	1254	1.3e-285	982.6	Vvi.12916	Putative_R-Genes,_predicted_from_NCBI_UniGene	Vitis vinifera	N	225452756	XM_002283015	PREDICTED: Vitis vinifera hypothetical protein LOC100262734 (LOC100262734), mRNA
Ghir_A02G006850	PRGDB00078664	54.2	802	346	4	1773	4115	587	1388	6.3e-241	834.3	Vvi.7279	Putative_R-Genes,_predicted_from_NCBI_UniGene	Vitis vinifera	TNL	225424830	XM_002268322	PREDICTED: Vitis vinifera hypothetical protein LOC100263854 (LOC100263854), mRNA
Ghir_A03G005040	PRGDB00078815	29.9	221	115	7	248	826	145	353	3.8e-14	79.3	Vvi.13914	Putative_R-Genes,_predicted_from_NCBI_UniGene	Vitis vinifera	RLP	225423461	XM_002274011	PREDICTED: Vitis vinifera hypothetical protein LOC100267943 (LOC100267943), mRNA
Ghir_A03G005130.1	PRGDB00078815	32.8	177	83	7	2985	2536	182	349	5.3e-11	70.1	Vvi.13914	Putative_R-Genes,_predicted_from_NCBI_UniGene	Vitis vinifera	RLP	225423461	XM_002274011	PREDICTED: Vitis vinifera hypothetical protein LOC100267943 (LOC100267943), mRNA
Ghir_D01G023460.1	PRGDB00186755	55.9	59	26	0	542	718	1134	1192	1.3e-10	68.2		Putative_R-Genes,_collected_from_NCBI_Protein	Vitis vinifera	CNL	359494547	XM_003634755	PREDICTED: Vitis vinifera putative disease resistance protein RGA3-like (LOC100852663), mRNA.
Ghir_A08G018060	PRGDB00145113	46.9	96	46	2	192	479	6	96	3.4e-19	95.5	AT1G70250.1	Putative_R-Genes,_predicted_from_Pythozome	Arabidopsis thaliana	Other			Protein kinase domain containing protein, expressed (best arabidopsis hit)
Ghir_A10G015770	PRGDB00175021	59.5	972	381	7	307	3195	21	988	0	1126.7	POPTR_0018s04880.1	Putative_R-Genes,_predicted_from_Pythozome	Populus trichocarpa	RLP			Protein kinase family protein with leucine-rich repeat domain (best arabidopsis hit)
Ghir_A10G016020	PRGDB00175021	62.9	1009	362	6	200	3199	15	1020	0	1265.8	POPTR_0018s04880.1	Putative_R-Genes,_predicted_from_Pythozome	Populus trichocarpa	RLP			Protein kinase family protein with leucine-rich repeat domain (best arabidopsis hit)
Ghir_A11G030090	PRGDB00177734	36	111	69	2	277	603	298	408	1.1e-10	67	30138.m004038	Putative_R-Genes,_predicted_from_Pythozome	Oryza barthii	N			Protein kinase superfamily protein (best arabidopsis hit)
Ghir_A11G030770	PRGDB00177734	42.9	49	28	0	1188	1334	199	247	8.5e-06	52	30138.m004038	Putative_R-Genes,_predicted_from_Pythozome	Oryza barthii	N			Protein kinase superfamily protein (best arabidopsis hit)
Ghir_A11G030770.1	PRGDB00177734	63.1	837	291	11	2230	4710	647	1475	3.1e-291	1001.5	30138.m004038	Putative_R-Genes,_predicted_from_Pythozome	Oryza barthii	N			Protein kinase superfamily protein (best arabidopsis hit)
Ghir_A11G030900.1	PRGDB00177734	44.9	89	46	3	511	774	195	281	1.5e-14	81.3	30138.m004038	Putative_R-Genes,_predicted_from_Pythozome	Oryza barthii	N			Protein kinase superfamily protein (best arabidopsis hit)
Ghir_A11G030940.2	PRGDB00177734	45.3	53	26	1	682	840	197	246	1.7e-06	54.3	30138.m004038	Putative_R-Genes,_predicted_from_Pythozome	Oryza barthii	N			Protein kinase superfamily protein (best arabidopsis hit)
Ghir_A07G022130.1	PRGDB00158056	81.8	291	53	0	2704	3576	793	1083	5.7e-134	478.8	orange1.1g045553m	Putative_R-Genes,_predicted_from_Pythozome	Citrus sinensis	RLP			receptor-like protein kinase 2 (best arabidopsis hit)
Ghir_A05G001300	PRGDB00143462	46.5	43	20	2	1006	1125	1064	1106	15	31.6	493465	Putative_R-Genes,_predicted_from_Pythozome	Arabidopsis lyrata	TNL			Regulator of chromosome condensation (RCC1) family protein (best arabidopsis hit)
Ghir_A05G001900	PRGDB00143462	35.6	87	53	3	1839	2090	1082	1168	6.6e-05	49.3	493465	Putative_R-Genes,_predicted_from_Pythozome	Arabidopsis lyrata	TNL			Regulator of chromosome condensation (RCC1) family protein (best arabidopsis hit)
Ghir_A05G002570	PRGDB00143462	28.6	105	63	3	1056	1367	1039	1132	2.6e-05	51.2	493465	Putative_R-Genes,_predicted_from_Pythozome	Arabidopsis lyrata	TNL			Regulator of chromosome condensation (RCC1) family protein (best arabidopsis hit)
Ghir_A05G002570.1	PRGDB00143462	36.3	322	189	7	680	1603	1084	1403	4.6e-48	192.6	493465	Putative_R-Genes,_predicted_from_Pythozome	Arabidopsis lyrata	TNL			Regulator of chromosome condensation (RCC1) family protein (best arabidopsis hit)
Ghir_A05G002940	PRGDB00143462	31.6	171	104	4	1157	1636	1245	1413	5.9e-13	75.9	493465	Putative_R-Genes,_predicted_from_Pythozome	Arabidopsis lyrata	TNL			Regulator of chromosome condensation (RCC1) family protein (best arabidopsis hit)
BGI_novel_G002707	PRGDB00062239	70.9	851	236	6	147	2687	1	843	0	1201.4	Disease resistance protein RGA2, putative	Putative_R-Genes,_collected_from_NCBI_Protein	Ricinus communis	CNL	255561033	XM_002521483	Ricinus communis Disease resistance protein RGA2, putative, mRNA.
BGI_novel_G002708	PRGDB00062299	70.9	851	236	6	521	3061	1	843	0	1201.4	Disease resistance protein RGA2, putative	Putative_R-Genes,_collected_from_NCBI_Protein	Ricinus communis	CNL	223539177	EQ973879	Ricinus communis genomic scaffold scf_1106159300426, whole genome shotgun sequence.
Ghir_A13G002730.1	PRGDB00183040	48.9	47	23	1	1046	1183	604	650	4.7e-08	59.3	GSVIVT01007793001	Putative_R-Genes,_predicted_from_Pythozome	Vitis vinifera	NL			RING/U-box superfamily protein (best arabidopsis hit)
Ghir_A13G002770	PRGDB00183040	43.3	60	32	2	3101	2925	588	646	5.9e-08	60.1	GSVIVT01007793001	Putative_R-Genes,_predicted_from_Pythozome	Vitis vinifera	NL			RING/U-box superfamily protein (best arabidopsis hit)
Ghir_A13G004110	PRGDB00183040	37.1	89	51	2	401	661	565	650	4.5e-11	69.3	GSVIVT01007793001	Putative_R-Genes,_predicted_from_Pythozome	Vitis vinifera	NL			RING/U-box superfamily protein (best arabidopsis hit)
Ghir_A13G004330	PRGDB00183040	45.7	105	53	1	401	715	555	655	3.1e-19	96.3	GSVIVT01007793001	Putative_R-Genes,_predicted_from_Pythozome	Vitis vinifera	NL			RING/U-box superfamily protein (best arabidopsis hit)
Ghir_A13G006610	PRGDB00183040	39.5	86	49	2	1049	1303	578	661	4.6e-10	65.9	GSVIVT01007793001	Putative_R-Genes,_predicted_from_Pythozome	Vitis vinifera	NL			RING/U-box superfamily protein (best arabidopsis hit)
Ghir_A13G006610.1	PRGDB00183040	39.5	86	49	2	2469	2723	578	661	8.9e-10	65.9	GSVIVT01007793001	Putative_R-Genes,_predicted_from_Pythozome	Vitis vinifera	NL			RING/U-box superfamily protein (best arabidopsis hit)
Ghir_A12G029250.1	PRGDB00182826	34.7	199	128	1	208	804	534	730	2.5e-26	119.4	GSVIVT01000665001	Putative_R-Genes,_predicted_from_Pythozome	Vitis vinifera	NL			RNA polymerase II fifth largest subunit, E (best arabidopsis hit)
Ghir_A13G000300	PRGDB00182826	60.8	79	31	0	406	642	652	730	7.8e-23	107.5	GSVIVT01000665001	Putative_R-Genes,_predicted_from_Pythozome	Vitis vinifera	NL			RNA polymerase II fifth largest subunit, E (best arabidopsis hit)
Ghir_A10G001790	PRGDB00171933	49.3	144	73	0	186	617	691	834	2.3e-34	147.9	LOC_Os11g27450.1	Putative_R-Genes,_predicted_from_Pythozome	Oryza sativa	NL			RNI-like superfamily protein (best arabidopsis hit)
Ghir_A10G002500	PRGDB00171933	44.4	293	154	4	1395	2261	975	1262	5.7e-62	239.6	LOC_Os11g27450.1	Putative_R-Genes,_predicted_from_Pythozome	Oryza sativa	NL			RNI-like superfamily protein (best arabidopsis hit)
Ghir_A05G017160	PRGDB00147214	34.3	461	263	9	94	1392	62	510	1.1e-62	240.7	Bradi4g24850.1	Putative_R-Genes,_predicted_from_Pythozome	Ricinus communis	NL			RNI-like superfamily protein (best arabidopsis hit); expressed protein (best rice hit)
Ghir_A06G013400.1	PRGDB00150337	64.9	590	162	9	296	1966	1	578	1.7e-210	732.3	evm.model.supercontig_435.5	Putative_R-Genes,_predicted_from_Pythozome	Arabidopsis lyrata subsp. lyrata	Mlo-like			Seven transmembrane MLO family protein (best arabidopsis hit)
Ghir_A07G012630.1	PRGDB00155707	57.5	565	201	6	261	1871	9	562	7.8e-184	643.7	orange1.1g008391m	Putative_R-Genes,_predicted_from_Pythozome	Citrus sinensis	Mlo-like			Seven transmembrane MLO family protein (best arabidopsis hit)
Ghir_A11G001700	PRGDB00176268	84.9	126	19	0	590	967	332	457	1.5e-57	223.8	29656.m000483	Putative_R-Genes,_predicted_from_Pythozome	Oryza barthii	Mlo-like			Seven transmembrane MLO family protein (best arabidopsis hit)
Ghir_A11G001760	PRGDB00176268	84.9	126	19	0	612	989	332	457	3.9e-57	223.8	29656.m000483	Putative_R-Genes,_predicted_from_Pythozome	Oryza barthii	Mlo-like			Seven transmembrane MLO family protein (best arabidopsis hit)
Ghir_A11G001800	PRGDB00176268	72.8	125	33	1	1514	1885	333	457	2.9e-46	186.8	29656.m000483	Putative_R-Genes,_predicted_from_Pythozome	Oryza barthii	Mlo-like			Seven transmembrane MLO family protein (best arabidopsis hit)
Ghir_A11G007930	PRGDB00176989	63.6	530	146	9	64	1629	16	506	1.1e-178	626.3	29900.m001539	Putative_R-Genes,_predicted_from_Pythozome	Oryza barthii	Mlo-like			Seven transmembrane MLO family protein (best arabidopsis hit)
BGI_novel_G001148	PRGDB00049789	60.4	225	64	1	728	1327	2	226	6.2e-71	268.5	putative RING zinc finger ankyrin protein	Putative_R-Genes,_collected_from_NCBI_Protein	Sorghum bicolor	N	190688725	EU810765	Sorghum bicolor clone BAC Sbb12448, complete sequence.
BGI_novel_G003765	PRGDB00063797	28.4	183	113	4	954	1499	194	359	6.2e-13	76.6	hypothetical protein	Putative_R-Genes,_collected_from_NCBI_Protein	Sorghum bicolor	T	242047787	XM_002461595	Sorghum bicolor hypothetical protein, mRNA.
Ghir_A07G002060	PRGDB00153580	74.4	718	176	4	326	2470	9	721	5e-303	1040	orange1.1g005001m	Putative_R-Genes,_predicted_from_Pythozome	Citrus sinensis	RLP			STRUBBELIG-receptor family 8 (best arabidopsis hit)
Ghir_A09G004700	PRGDB00166311	77	543	114	3	1224	2819	185	727	1.2e-232	806.2	cassava4.1_002481m	Putative_R-Genes,_predicted_from_Pythozome	Vitis aestivalis	RLP			STRUBBELIG-receptor family 8 (best arabidopsis hit)
Ghir_D01G003160	PRGDB00184271	87.2	47	5	1	378	518	662	707	4.4e-17	89.4	GRMZM2G162531_T01	Putative_R-Genes,_predicted_from_Pythozome	Zea mays	RLP			STRUBBELIG-receptor family 8 (best arabidopsis hit); STRUBBELIG-RECEPTOR FAMILY 7 precursor, putative, expressed (best rice hit)
Ghir_D01G004910	PRGDB00184271	91.5	47	3	1	477	617	662	707	6.2e-17	89	GRMZM2G162531_T01	Putative_R-Genes,_predicted_from_Pythozome	Zea mays	RLP			STRUBBELIG-receptor family 8 (best arabidopsis hit); STRUBBELIG-RECEPTOR FAMILY 7 precursor, putative, expressed (best rice hit)
Ghir_D13G024560	PRGDB00184271	89.4	47	4	1	316	456	662	707	3.3e-17	89.7	GRMZM2G162531_T01	Putative_R-Genes,_predicted_from_Pythozome	Zea mays	RLP			STRUBBELIG-receptor family 8 (best arabidopsis hit); STRUBBELIG-RECEPTOR FAMILY 7 precursor, putative, expressed (best rice hit)
Ghir_A08G001160.2	PRGDB00159582	52.4	900	376	11	391	3048	6	867	8.9e-252	870.2	Glyma08g05340.1	Putative_R-Genes,_predicted_from_Pythozome	Glycine max	RLP			transmembrane kinase 1 (best arabidopsis hit)
Ghir_A11G034340	PRGDB00178147	75.4	680	158	3	186	2201	1	679	5.6e-292	1003	POPTR_0002s25300.1	Putative_R-Genes,_predicted_from_Pythozome	Populus trichocarpa	RLP			transmembrane kinase-like 1 (best arabidopsis hit)
Ghir_A07G021550	PRGDB00157612	50.9	507	243	5	406	1914	18	522	4.4e-132	471.9	orange1.1g001805m	Putative_R-Genes,_predicted_from_Pythozome	Citrus sinensis	TNL			transmembrane receptors;ATP binding (best arabidopsis hit)
Ghir_A08G016270	PRGDB00164261	25.5	611	370	16	620	2374	1494	2045	4e-44	179.9	Glyma16g23790.1	Putative_R-Genes,_predicted_from_Pythozome	Glycine max	CNL			transmembrane receptors;ATP binding (best arabidopsis hit)
Ghir_A10G018000.1	PRGDB00175219	52.8	193	71	1	431	1009	3	175	3.6e-51	202.2	POPTR_0003s08250.1	Putative_R-Genes,_predicted_from_Pythozome	Populus trichocarpa	TNL			transmembrane receptors;ATP binding (best arabidopsis hit)
Ghir_A10G018460	PRGDB00175219	53.3	195	71	1	367	951	1	175	3.7e-52	205.7	POPTR_0003s08250.1	Putative_R-Genes,_predicted_from_Pythozome	Populus trichocarpa	TNL			transmembrane receptors;ATP binding (best arabidopsis hit)
Ghir_A08G004810	PRGDB00161399	57.7	149	59	2	51	488	11	158	3.4e-41	170.2	cassava4.1_000507m	Putative_R-Genes,_predicted_from_Pythozome	Vitis aestivalis	CNL			transmembrane receptors;ATP binding (best arabidopsis hit)
BGI_novel_G000065	PRGDB00077464	44.8	125	62	2	1901	2254	1067	1191	3.2e-21	103.6	Ta.3983	Putative_R-Genes,_predicted_from_NCBI_UniGene	Triticum aestivum	RLP	241988090	AK335347	Triticum aestivum cDNA, clone: WT012_K21, cultivar: Chinese Spring
Ghir_D02G001290.1	PRGDB00187911	40.6	315	179	5	150	1079	889	1200	2.5e-68	259.2	Ta.74193	Putative_R-Genes,_predicted_from_NCBI_UniGene	Triticum aestivum	RLP	241988090	AK335347	Triticum aestivum cDNA, clone: WT012_K21, cultivar: Chinese Spring
Ghir_D02G003210	PRGDB00187911	41.3	138	80	1	2442	2029	1058	1194	5.8e-31	136	Ta.74193	Putative_R-Genes,_predicted_from_NCBI_UniGene	Triticum aestivum	RLP	241988090	AK335347	Triticum aestivum cDNA, clone: WT012_K21, cultivar: Chinese Spring
Ghir_D02G004020	PRGDB00187911	37.9	327	194	5	7	969	878	1201	2e-59	229.2	Ta.74193	Putative_R-Genes,_predicted_from_NCBI_UniGene	Triticum aestivum	RLP	241988090	AK335347	Triticum aestivum cDNA, clone: WT012_K21, cultivar: Chinese Spring
Ghir_D02G004320	PRGDB00187911	43.2	336	177	5	331	1323	876	1202	1.5e-74	280	Ta.74193	Putative_R-Genes,_predicted_from_NCBI_UniGene	Triticum aestivum	RLP	241988090	AK335347	Triticum aestivum cDNA, clone: WT012_K21, cultivar: Chinese Spring
Ghir_D03G003530	PRGDB00191296	44.8	277	152	1	1592	2419	247	523	1.4e-59	231.1	Lsa.44031	Putative_R-Genes,_predicted_from_NCBI_UniGene	Lactuca sativa	N	329679120	JI581626	TSA: Lactuca sativa CLC_LTR_V1A_17001 mRNA sequence
Ghir_D03G004830	PRGDB00191296	43.7	263	148	0	701	1489	257	519	8.6e-51	201.4	Lsa.44031	Putative_R-Genes,_predicted_from_NCBI_UniGene	Lactuca sativa	N	329679120	JI581626	TSA: Lactuca sativa CLC_LTR_V1A_17001 mRNA sequence
Ghir_D03G004880	PRGDB00191296	32	269	171	6	733	1533	261	519	3.4e-22	106.7	Lsa.44031	Putative_R-Genes,_predicted_from_NCBI_UniGene	Lactuca sativa	N	329679120	JI581626	TSA: Lactuca sativa CLC_LTR_V1A_17001 mRNA sequence
Ghir_D03G006870	PRGDB00191296	29.8	248	167	4	551	1282	277	521	6e-18	92.4	Lsa.44031	Putative_R-Genes,_predicted_from_NCBI_UniGene	Lactuca sativa	N	329679120	JI581626	TSA: Lactuca sativa CLC_LTR_V1A_17001 mRNA sequence
Ghir_D03G009590	PRGDB00191296	35.6	222	131	6	662	1321	266	477	7.5e-21	102.4	Lsa.44031	Putative_R-Genes,_predicted_from_NCBI_UniGene	Lactuca sativa	N	329679120	JI581626	TSA: Lactuca sativa CLC_LTR_V1A_17001 mRNA sequence
Ghir_D03G011760	PRGDB00191296	32.1	271	178	5	580	1392	266	530	1.1e-22	108.2	Lsa.44031	Putative_R-Genes,_predicted_from_NCBI_UniGene	Lactuca sativa	N	329679120	JI581626	TSA: Lactuca sativa CLC_LTR_V1A_17001 mRNA sequence
Ghir_D03G013120.1	PRGDB00191296	45.1	304	165	2	1205	2113	222	524	2.4e-64	246.9	Lsa.44031	Putative_R-Genes,_predicted_from_NCBI_UniGene	Lactuca sativa	N	329679120	JI581626	TSA: Lactuca sativa CLC_LTR_V1A_17001 mRNA sequence
Ghir_D03G003290	PRGDB00190543	38.6	88	44	1	1704	1967	1124	1201	6.7e-09	63.2	Lsa.21632	Putative_R-Genes,_predicted_from_NCBI_UniGene	Lactuca sativa	TNL	329671799	JI574305	TSA: Lactuca sativa Letassy_X1_14610 mRNA sequence
Ghir_D03G016620	PRGDB00192108	52.4	393	161	7	234	1412	1167	1533	2.8e-103	375.9	Lsa.52993	Putative_R-Genes,_predicted_from_NCBI_UniGene	Lactuca sativa	TNL	329671470	JI573976	TSA: Lactuca sativa Letassy_X1_17963 mRNA sequence
Ghir_D03G016900	PRGDB00192108	50.6	397	165	7	417	1607	1168	1533	1.1e-99	364.4	Lsa.52993	Putative_R-Genes,_predicted_from_NCBI_UniGene	Lactuca sativa	TNL	329671470	JI573976	TSA: Lactuca sativa Letassy_X1_17963 mRNA sequence
Ghir_D03G016980	PRGDB00192108	35.4	379	203	12	1	1050	1168	1533	6.1e-49	194.5	Lsa.52993	Putative_R-Genes,_predicted_from_NCBI_UniGene	Lactuca sativa	TNL	329671470	JI573976	TSA: Lactuca sativa Letassy_X1_17963 mRNA sequence
Ghir_D03G016980.1	PRGDB00192108	47.4	363	169	4	400	1488	1193	1533	8.5e-90	330.9	Lsa.52993	Putative_R-Genes,_predicted_from_NCBI_UniGene	Lactuca sativa	TNL	329671470	JI573976	TSA: Lactuca sativa Letassy_X1_17963 mRNA sequence
Ghir_D03G015440	PRGDB00191790	53.8	184	84	1	296	847	297	479	2.9e-64	245.7	Lsa.51071	Putative_R-Genes,_predicted_from_NCBI_UniGene	Lactuca sativa	N	329678974	JI581480	TSA: Lactuca sativa Letassy_X1_20535 mRNA sequence
Ghir_D03G016050.1	PRGDB00191790	60.7	117	45	1	424	774	297	412	1.8e-43	176.8	Lsa.51071	Putative_R-Genes,_predicted_from_NCBI_UniGene	Lactuca sativa	N	329678974	JI581480	TSA: Lactuca sativa Letassy_X1_20535 mRNA sequence
Ghir_D03G016210	PRGDB00191790	52.4	191	90	1	1772	2344	290	479	4.2e-63	243	Lsa.51071	Putative_R-Genes,_predicted_from_NCBI_UniGene	Lactuca sativa	N	329678974	JI581480	TSA: Lactuca sativa Letassy_X1_20535 mRNA sequence
Ghir_D03G001190.1	PRGDB00190291	30.9	149	98	2	551	997	397	540	8.3e-08	59.7	Lsa.16797	Putative_R-Genes,_predicted_from_NCBI_UniGene	Lactuca sativa	N	329676902	JI579408	TSA: Lactuca sativa Letassy_X1_5504 mRNA sequence
Ghir_D03G002700	PRGDB00190291	46	289	151	2	1962	2825	343	627	7e-56	219.2	Lsa.16797	Putative_R-Genes,_predicted_from_NCBI_UniGene	Lactuca sativa	N	329676902	JI579408	TSA: Lactuca sativa Letassy_X1_5504 mRNA sequence
Ghir_A11G035980.1	PRGDB00178246	62.1	66	25	0	2412	2609	680	745	5e-18	93.2	POPTR_0002s16160.1	Putative_R-Genes,_predicted_from_Pythozome	Populus trichocarpa	N			U-box domain-containing protein kinase family protein (best arabidopsis hit)
Ghir_A02G016000	PRGDB00173248	58.4	813	310	8	248	2623	1	806	6.2e-268	924.1	ppa001508m	Putative_R-Genes,_predicted_from_Pythozome	Prunus persica	CN			U-box domain-containing protein kinase family protein (best arabidopsis hit)
Ghir_A12G008380.3	PRGDB00181372	21.3	150	115	1	1543	1992	120	266	8.3e-06	52.8	Si005894m	Putative_R-Genes,_predicted_from_Pythozome	Setaria italica	CN			U-box domain-containing protein kinase family protein (best arabidopsis hit); protein kinase, putative, expressed (best rice hit)
Ghir_A12G008990	PRGDB00181372	24.2	120	85	2	789	1148	153	266	5.5e-06	53.5	Si005894m	Putative_R-Genes,_predicted_from_Pythozome	Setaria italica	CN			U-box domain-containing protein kinase family protein (best arabidopsis hit); protein kinase, putative, expressed (best rice hit)
BGI_novel_G004021	PRGDB00064617	44.1	93	38	2	308	586	21	99	2.6e-11	70.9	Zm.143017	Putative_R-Genes,_predicted_from_NCBI_UniGene	Zea mays	RLK	223973790	BT065207	Zea mays full-length cDNA clone ZM_BFb0035I10 mRNA, complete cds
Ghir_D07G016150	PRGDB00207410	45.2	146	78	1	849	1280	349	494	6.7e-30	132.1	Aquca_009_00902.1	Putative_R-Genes,_predicted_from_Pythozome	Aquilegia coerulea	RLP
Ghir_D07G016570	PRGDB00207410	46.3	147	77	1	1489	1923	349	495	4.3e-30	133.3	Aquca_009_00902.1	Putative_R-Genes,_predicted_from_Pythozome	Aquilegia coerulea	RLP
Ghir_D07G017540	PRGDB00207410	54.8	935	371	5	132	2936	501	1383	2.6e-276	951.4	Aquca_009_00902.1	Putative_R-Genes,_predicted_from_Pythozome	Aquilegia coerulea	RLP
Ghir_D07G018800.2	PRGDB00207410	33.8	480	253	8	182	1474	33	496	8.2e-61	234.6	Aquca_009_00902.1	Putative_R-Genes,_predicted_from_Pythozome	Aquilegia coerulea	RLP
Ghir_D07G021280	PRGDB00208610	64.3	602	212	3	627	2423	76	677	1.5e-217	756.1	Aquca_016_00415.3	Putative_R-Genes,_predicted_from_Pythozome	Aquilegia coerulea	RLP
Ghir_D05G003740	PRGDB00200674	35	143	83	5	198	602	14	154	8.9e-13	75.5	Bra005271	Putative_R-Genes,_predicted_from_Pythozome	Brassica rapa	CNL
Ghir_D05G004860	PRGDB00200675	45.3	172	84	4	879	1382	800	965	6.9e-36	151.8	Bra018448	Putative_R-Genes,_predicted_from_Pythozome	Brassica rapa	CNL
Ghir_D05G005130	PRGDB00200675	30.5	325	187	8	887	1816	665	965	1.3e-32	141.4	Bra018448	Putative_R-Genes,_predicted_from_Pythozome	Brassica rapa	CNL
Ghir_D05G005540	PRGDB00200675	43.4	122	59	5	1999	2352	850	965	1.5e-13	78.2	Bra018448	Putative_R-Genes,_predicted_from_Pythozome	Brassica rapa	CNL
Ghir_D05G005640	PRGDB00200719	28.1	128	71	2	211	594	131	237	0.013	41.6	Bra005270	Putative_R-Genes,_predicted_from_Pythozome	Brassica rapa	CNL
Ghir_D05G005650	PRGDB00200719	31.5	146	90	5	1487	1903	2	144	5.9e-12	73.2	Bra005270	Putative_R-Genes,_predicted_from_Pythozome	Brassica rapa	CNL
Ghir_D05G005960	PRGDB00200719	30.1	146	92	5	1113	1529	2	144	2.5e-11	70.9	Bra005270	Putative_R-Genes,_predicted_from_Pythozome	Brassica rapa	CNL
Ghir_D05G017570	PRGDB00201227	51.6	626	286	5	262	2091	981	1605	8.6e-176	617.1	Bra026094	Putative_R-Genes,_predicted_from_Pythozome	Brassica rapa	CNL
Ghir_D05G017580	PRGDB00201227	40.6	631	349	11	255	2099	992	1612	1.3e-123	443.7	Bra026094	Putative_R-Genes,_predicted_from_Pythozome	Brassica rapa	CNL
Ghir_D05G017580.1	PRGDB00201227	44.7	94	50	2	1029	1310	966	1057	6.2e-13	76.6	Bra026094	Putative_R-Genes,_predicted_from_Pythozome	Brassica rapa	CNL
Ghir_D05G017610	PRGDB00201227	42.1	629	338	10	174	2006	992	1612	2.5e-132	472.6	Bra026094	Putative_R-Genes,_predicted_from_Pythozome	Brassica rapa	CNL
Ghir_D05G018190	PRGDB00201227	54.7	172	72	2	489	986	1353	1524	7.1e-44	177.6	Bra026094	Putative_R-Genes,_predicted_from_Pythozome	Brassica rapa	CNL
Ghir_D05G031250	PRGDB00201975	42.2	374	185	3	338	1444	42	389	3.8e-85	315.5	Bra036845	Putative_R-Genes,_predicted_from_Pythozome	Brassica rapa	CNL
Ghir_D05G032290.1	PRGDB00201975	50.4	395	169	6	397	1548	34	412	2.5e-106	386	Bra036845	Putative_R-Genes,_predicted_from_Pythozome	Brassica rapa	CNL
Ghir_D05G032370	PRGDB00201975	45.6	388	181	6	580	1710	34	402	5e-95	348.6	Bra036845	Putative_R-Genes,_predicted_from_Pythozome	Brassica rapa	CNL
Ghir_D05G032460.1	PRGDB00201975	42.9	196	99	3	535	1089	191	384	1.5e-38	160.2	Bra036845	Putative_R-Genes,_predicted_from_Pythozome	Brassica rapa	CNL
Ghir_D05G032740	PRGDB00201975	42.1	375	186	3	385	1494	42	390	5.6e-87	321.6	Bra036845	Putative_R-Genes,_predicted_from_Pythozome	Brassica rapa	CNL
Ghir_D06G009060.1	PRGDB00202436	37.3	740	410	13	684	2894	1252	1940	1.6e-124	447.2	Bra010551	Putative_R-Genes,_predicted_from_Pythozome	Brassica rapa	CNL
Ghir_D06G009490	PRGDB00202436	34.7	95	56	2	1199	1483	1487	1575	3.6e-09	64.3	Bra010551	Putative_R-Genes,_predicted_from_Pythozome	Brassica rapa	CNL
Ghir_D06G010120	PRGDB00202436	36.7	694	378	13	551	2602	1249	1891	1.9e-119	430.3	Bra010551	Putative_R-Genes,_predicted_from_Pythozome	Brassica rapa	CNL
Ghir_D06G010670	PRGDB00202436	37.3	695	388	11	828	2906	1252	1900	2e-116	421	Bra010551	Putative_R-Genes,_predicted_from_Pythozome	Brassica rapa	CNL
Ghir_D06G007030	PRGDB00202237	97.6	41	1	0	482	604	1758	1798	2.1e-16	86.3	Bra017241	Putative_R-Genes,_predicted_from_Pythozome	Brassica rapa	N
Ghir_D06G008220	PRGDB00202237	78.9	76	16	0	3276	3503	1832	1907	3.3e-30	134	Bra017241	Putative_R-Genes,_predicted_from_Pythozome	Brassica rapa	N
Ghir_D05G015630	PRGDB00201131	88.2	533	62	1	465	2063	133	664	4.1e-283	973.8	Bra018196	Putative_R-Genes,_predicted_from_Pythozome	Brassica rapa	NL
Ghir_D05G006690.1	PRGDB00200844	46	335	154	4	592	1530	56	385	2.7e-78	292.7	Bra008427	Putative_R-Genes,_predicted_from_Pythozome	Brassica rapa	RLP
Ghir_D05G007370	PRGDB00200844	35.8	53	34	0	784	942	66	118	2.2	35.8	Bra008427	Putative_R-Genes,_predicted_from_Pythozome	Brassica rapa	RLP
Ghir_D05G007370.1	PRGDB00200844	35.8	53	34	0	712	870	66	118	2.1	35.8	Bra008427	Putative_R-Genes,_predicted_from_Pythozome	Brassica rapa	RLP
Ghir_D05G008810	PRGDB00200844	35.8	53	34	0	722	880	66	118	2.2	35.8	Bra008427	Putative_R-Genes,_predicted_from_Pythozome	Brassica rapa	RLP
Ghir_D05G012500	PRGDB00201109	46.7	362	181	7	136	1194	7	365	1.2e-85	316.6	Bra015449	Putative_R-Genes,_predicted_from_Pythozome	Brassica rapa	RLP
Ghir_D05G013470	PRGDB00201109	37.1	224	134	4	177	839	123	342	2.1e-35	149.8	Bra015449	Putative_R-Genes,_predicted_from_Pythozome	Brassica rapa	RLP
Ghir_D05G014430	PRGDB00201109	40	75	41	2	5464	5682	274	346	9.6e-09	63.5	Bra015449	Putative_R-Genes,_predicted_from_Pythozome	Brassica rapa	RLP
Ghir_D05G019360	PRGDB00201252	70	20	6	0	3382	3441	1081	1100	1.2	35.8	Bra018936	Putative_R-Genes,_predicted_from_Pythozome	Brassica rapa	RLP
Ghir_D05G020140	PRGDB00201252	43.2	81	46	0	545	787	849	929	5.6e-09	63.5	Bra018936	Putative_R-Genes,_predicted_from_Pythozome	Brassica rapa	RLP
Ghir_D05G020430	PRGDB00201252	45.5	88	44	2	679	936	848	933	1.4e-11	72	Bra018936	Putative_R-Genes,_predicted_from_Pythozome	Brassica rapa	RLP
Ghir_D05G021410	PRGDB00201252	38.4	86	53	0	535	792	848	933	4.9e-09	62.4	Bra018936	Putative_R-Genes,_predicted_from_Pythozome	Brassica rapa	RLP
Ghir_D05G024100	PRGDB00201508	57.1	410	128	4	193	1296	2	405	1.2e-123	443.4	Bra021474	Putative_R-Genes,_predicted_from_Pythozome	Brassica rapa	RLP
Ghir_D05G024120	PRGDB00201508	55.9	410	132	4	177	1277	2	405	1.6e-120	433	Bra021474	Putative_R-Genes,_predicted_from_Pythozome	Brassica rapa	RLP
Ghir_D05G026180	PRGDB00201591	70.5	227	66	1	1443	2120	65	291	8.8e-95	348.2	Bra013728	Putative_R-Genes,_predicted_from_Pythozome	Brassica rapa	RLP
Ghir_D05G038180	PRGDB00202169	68.6	236	39	1	267	869	15	250	1.1e-79	297	Bra007015	Putative_R-Genes,_predicted_from_Pythozome	Brassica rapa	RLP
Ghir_D05G038290	PRGDB00202169	54.4	125	57	0	249	623	15	139	4.1e-33	142.1	Bra007015	Putative_R-Genes,_predicted_from_Pythozome	Brassica rapa	RLP
Ghir_D05G038320.1	PRGDB00202169	50	128	64	0	309	692	13	140	9.4e-35	147.5	Bra007015	Putative_R-Genes,_predicted_from_Pythozome	Brassica rapa	RLP
Ghir_D05G039380	PRGDB00202169	44.4	27	15	0	386	466	16	42	6.4	32	Bra007015	Putative_R-Genes,_predicted_from_Pythozome	Brassica rapa	RLP
Ghir_D05G039610.1	PRGDB00202169	33.9	115	73	3	291	629	16	129	1.6e-13	79	Bra007015	Putative_R-Genes,_predicted_from_Pythozome	Brassica rapa	RLP
Ghir_D05G039620	PRGDB00202169	48.4	128	66	0	299	682	13	140	1.1e-31	137.9	Bra007015	Putative_R-Genes,_predicted_from_Pythozome	Brassica rapa	RLP
Ghir_D06G001080	PRGDB00202169	44.2	95	53	0	410	694	15	109	1.4e-18	94.7	Bra007015	Putative_R-Genes,_predicted_from_Pythozome	Brassica rapa	RLP
Ghir_D06G001350	PRGDB00202169	28.1	121	82	2	229	579	16	135	2e-07	56.6	Bra007015	Putative_R-Genes,_predicted_from_Pythozome	Brassica rapa	RLP
Ghir_D06G001810	PRGDB00202169	66.9	236	43	1	245	847	15	250	3.8e-79	295	Bra007015	Putative_R-Genes,_predicted_from_Pythozome	Brassica rapa	RLP
Ghir_D06G003780	PRGDB00202169	41.5	212	88	1	214	741	7	218	1.2e-39	163.7	Bra007015	Putative_R-Genes,_predicted_from_Pythozome	Brassica rapa	RLP
Ghir_D06G004010	PRGDB00202169	32	100	67	1	532	828	7	106	2.9e-12	73.6	Bra007015	Putative_R-Genes,_predicted_from_Pythozome	Brassica rapa	RLP
Ghir_D06G004010.1	PRGDB00202169	48.9	133	68	0	336	734	7	139	1e-35	151	Bra007015	Putative_R-Genes,_predicted_from_Pythozome	Brassica rapa	RLP
Ghir_D06G010860	PRGDB00202493	72.3	47	13	0	1329	1469	839	885	3.8e-12	73.6	Bra030622	Putative_R-Genes,_predicted_from_Pythozome	Brassica rapa	RLP
Ghir_D06G010860.1	PRGDB00202493	66	53	18	0	899	1057	839	891	5.9e-13	75.9	Bra030622	Putative_R-Genes,_predicted_from_Pythozome	Brassica rapa	RLP
Ghir_D06G011190	PRGDB00202493	63.6	140	45	2	564	980	808	942	2.5e-42	173.3	Bra030622	Putative_R-Genes,_predicted_from_Pythozome	Brassica rapa	RLP
Ghir_D05G009610.1	PRGDB00200918	32.1	321	174	18	924	1829	521	816	2.5e-32	140.2	Bra023648	Putative_R-Genes,_predicted_from_Pythozome	Brassica rapa	TNL
Ghir_D05G010020	PRGDB00200918	23.4	214	120	12	1339	1911	624	816	1.9e-05	50.8	Bra023648	Putative_R-Genes,_predicted_from_Pythozome	Brassica rapa	TNL
Ghir_D05G010350.1	PRGDB00200918	36.7	109	65	3	1525	1851	724	828	1.7e-14	81.3	Bra023648	Putative_R-Genes,_predicted_from_Pythozome	Brassica rapa	TNL
Ghir_D05G028850	PRGDB00201821	49	49	25	0	618	764	1084	1132	8.1e-06	52.4	Bra012540	Putative_R-Genes,_predicted_from_Pythozome	Brassica rapa	TNL
Ghir_D05G028870	PRGDB00201821	40.4	114	68	0	797	1138	954	1067	5e-18	92.8	Bra012540	Putative_R-Genes,_predicted_from_Pythozome	Brassica rapa	TNL
Ghir_D05G030270	PRGDB00201835	43.3	67	36	1	742	942	260	324	3.8e-06	52.4	Bra013144	Putative_R-Genes,_predicted_from_Pythozome	Brassica rapa	TNL
Ghir_D06G013820	PRGDB00202605	52.8	229	98	5	270	929	19	246	5.7e-67	255	Carubv10019327m	Putative_R-Genes,_predicted_from_Pythozome	Capsella rubella	Other
Ghir_D06G014200	PRGDB00202605	38.2	246	132	10	2205	2906	9	246	5.3e-42	172.9	Carubv10019327m	Putative_R-Genes,_predicted_from_Pythozome	Capsella rubella	Other
Ghir_D06G015060	PRGDB00202605	57.9	233	91	5	232	912	17	248	6.8e-77	288.1	Carubv10019327m	Putative_R-Genes,_predicted_from_Pythozome	Capsella rubella	Other
Ghir_D06G017120	PRGDB00203751	42.1	133	62	5	585	944	1198	1328	1.8e-16	87	Carubv10025742m	Putative_R-Genes,_predicted_from_Pythozome	Capsella rubella	TNL
Ghir_D06G017120.1	PRGDB00203751	42.9	133	61	5	679	1038	1198	1328	5.9e-18	92	Carubv10025742m	Putative_R-Genes,_predicted_from_Pythozome	Capsella rubella	TNL
Ghir_D07G021640	PRGDB00210019	64.4	73	23	2	616	831	486	556	1.1e-15	86.3	Eucgr.E00958.1	Putative_R-Genes,_predicted_from_Pythozome	Eucalyptus grandis	NL
Ghir_D07G021640.1	PRGDB00210019	93.5	31	2	0	1744	1652	486	516	9.5e-09	63.2	Eucgr.E00958.1	Putative_R-Genes,_predicted_from_Pythozome	Eucalyptus grandis	NL
Ghir_D07G022220.1	PRGDB00211385	57.4	619	225	6	166	1914	36	651	3.7e-188	658.7	Eucgr.G03081.1	Putative_R-Genes,_predicted_from_Pythozome	Eucalyptus grandis	RLP
Ghir_A05G023100	PRGDB00211657	60	55	22	0	355	519	670	724	1.1e-13	77.8	Eucgr.H02157.1	Putative_R-Genes,_predicted_from_Pythozome	Eucalyptus grandis	TNL
Ghir_D07G022460.1	PRGDB00211657	70.5	44	13	0	280	411	670	713	8.1e-12	70.9	Eucgr.H02157.1	Putative_R-Genes,_predicted_from_Pythozome	Eucalyptus grandis	TNL
Ghir_D07G024880	PRGDB00211657	55.6	45	20	0	673	807	670	714	3e-10	67.4	Eucgr.H02157.1	Putative_R-Genes,_predicted_from_Pythozome	Eucalyptus grandis	TNL
Ghir_D08G001180.1	PRGDB00211657	68.9	45	14	0	282	416	670	714	2.8e-12	72.8	Eucgr.H02157.1	Putative_R-Genes,_predicted_from_Pythozome	Eucalyptus grandis	TNL
Ghir_D08G002690	PRGDB00211657	54.5	55	25	0	287	451	670	724	9.2e-11	67.8	Eucgr.H02157.1	Putative_R-Genes,_predicted_from_Pythozome	Eucalyptus grandis	TNL
Ghir_D08G004050	PRGDB00211657	64.4	45	16	0	363	497	670	714	3.4e-12	72.8	Eucgr.H02157.1	Putative_R-Genes,_predicted_from_Pythozome	Eucalyptus grandis	TNL
Ghir_D08G004130	PRGDB00211657	58	50	20	1	536	685	666	714	4.3e-10	65.9	Eucgr.H02157.1	Putative_R-Genes,_predicted_from_Pythozome	Eucalyptus grandis	TNL
Ghir_D08G004140.1	PRGDB00211657	48.8	43	22	0	739	867	671	713	4.8e-06	52.8	Eucgr.H02157.1	Putative_R-Genes,_predicted_from_Pythozome	Eucalyptus grandis	TNL
Ghir_D08G008410	PRGDB00211657	50	56	27	1	576	743	666	720	1.1e-08	61.2	Eucgr.H02157.1	Putative_R-Genes,_predicted_from_Pythozome	Eucalyptus grandis	TNL
Ghir_D08G011510.1	PRGDB00211657	68.9	45	14	0	385	519	670	714	2.5e-12	73.2	Eucgr.H02157.1	Putative_R-Genes,_predicted_from_Pythozome	Eucalyptus grandis	TNL
Ghir_D08G012060.1	PRGDB00211657	66.7	45	15	0	293	427	670	714	1.9e-11	69.7	Eucgr.H02157.1	Putative_R-Genes,_predicted_from_Pythozome	Eucalyptus grandis	TNL
Ghir_A10G005750	PRGDB00217808	33.8	154	100	1	399	854	29	182	1.9e-20	100.1	Thhalv10006389m	Putative_R-Genes,_predicted_from_Pythozome	Eutrema halophilum	RLP
Ghir_D12G026140	PRGDB00217736	26.7	90	64	1	141	410	360	447	0.035	38.9	Thhalv10027748m	Putative_R-Genes,_predicted_from_Pythozome	Eutrema halophilum	TNL
Ghir_D12G027790	PRGDB00217736	27.8	90	63	1	118	387	360	447	0.02	40	Thhalv10027748m	Putative_R-Genes,_predicted_from_Pythozome	Eutrema halophilum	TNL
Ghir_D12G028340	PRGDB00217737	35.1	154	89	1	227	655	271	424	2.5e-20	99.4	Thhalv10027751m	Putative_R-Genes,_predicted_from_Pythozome	Eutrema halophilum	TNL
Ghir_D12G028730	PRGDB00217737	29.7	148	80	2	13	384	185	332	1.3e-10	65.9	Thhalv10027751m	Putative_R-Genes,_predicted_from_Pythozome	Eutrema halophilum	TNL
Ghir_D13G000500	PRGDB00217737	36.2	58	37	0	3273	3100	186	243	0.00025	48.1	Thhalv10027751m	Putative_R-Genes,_predicted_from_Pythozome	Eutrema halophilum	TNL
Ghir_D13G002020	PRGDB00217738	32.4	74	50	0	690	911	186	259	0.00011	47.8	Thhalv10027802m	Putative_R-Genes,_predicted_from_Pythozome	Eutrema halophilum	TNL
Ghir_D13G004250	PRGDB00217904	32.5	157	92	3	1904	2347	175	326	4.7e-15	83.2	Thhalv10018718m	Putative_R-Genes,_predicted_from_Pythozome	Eutrema halophilum	TNL
Ghir_D13G004500	PRGDB00217904	33.6	152	94	2	156	590	175	326	2.5e-18	92.4	Thhalv10018718m	Putative_R-Genes,_predicted_from_Pythozome	Eutrema halophilum	TNL
Ghir_D13G004510.1	PRGDB00218046	41.8	189	76	7	455	1018	333	488	1.5e-29	131.7	Thhalv10027276m	Putative_R-Genes,_predicted_from_Pythozome	Eutrema halophilum	TNL
Ghir_D07G006050.1	PRGDB00205829	30.4	148	80	4	334	714	54	199	1.5e-10	67.4	Lus10029905	Putative_R-Genes,_predicted_from_Pythozome	Linum usitatissimum	N
Ghir_D07G004990	PRGDB00205572	60.8	181	55	4	140	643	856	1033	1.2e-48	193.4	Lus10010223	Putative_R-Genes,_predicted_from_Pythozome	Linum usitatissimum	NL
Ghir_D07G005580.1	PRGDB00205572	62.7	169	49	3	116	589	868	1033	3.7e-48	192.6	Lus10010223	Putative_R-Genes,_predicted_from_Pythozome	Linum usitatissimum	NL
Ghir_D07G005600.1	PRGDB00205572	59.1	193	61	7	184	747	854	1033	6.8e-47	187.6	Lus10010223	Putative_R-Genes,_predicted_from_Pythozome	Linum usitatissimum	NL
Ghir_D07G004300	PRGDB00205338	44	468	233	11	1732	3084	952	1407	1.3e-92	341.3	Lus10015091	Putative_R-Genes,_predicted_from_Pythozome	Linum usitatissimum	RLK-GNK2
Ghir_D06G023150	PRGDB00204891	63.2	19	7	0	1475	1531	1122	1140	8.7	32	Lus10020500	Putative_R-Genes,_predicted_from_Pythozome	Linum usitatissimum	RLP
Ghir_D06G023170.1	PRGDB00204891	38.3	128	71	3	1223	1603	1020	1140	5.4e-19	95.9	Lus10020500	Putative_R-Genes,_predicted_from_Pythozome	Linum usitatissimum	RLP
Ghir_D06G023670	PRGDB00204891	44.6	121	59	3	1192	1554	1024	1136	2.8e-22	106.7	Lus10020500	Putative_R-Genes,_predicted_from_Pythozome	Linum usitatissimum	RLP
Ghir_D06G023670.1	PRGDB00204891	43.7	126	63	3	1287	1664	1024	1141	1.8e-24	114.4	Lus10020500	Putative_R-Genes,_predicted_from_Pythozome	Linum usitatissimum	RLP
Ghir_D07G008550	PRGDB00206435	64.8	105	36	1	397	708	770	874	3.8e-31	135.6	Lus10015549	Putative_R-Genes,_predicted_from_Pythozome	Linum usitatissimum	RLP
Ghir_D06G020340	PRGDB00204876	54.8	62	26	2	711	893	1440	1500	8.8e-10	65.1	Lus10019708	Putative_R-Genes,_predicted_from_Pythozome	Linum usitatissimum	TNL
Ghir_D06G020490	PRGDB00204876	47.6	143	55	5	332	760	1436	1558	2e-24	113.2	Lus10019708	Putative_R-Genes,_predicted_from_Pythozome	Linum usitatissimum	TNL
Ghir_D06G021120.1	PRGDB00204876	83.8	68	11	0	2358	2561	1464	1531	2e-26	121.3	Lus10019708	Putative_R-Genes,_predicted_from_Pythozome	Linum usitatissimum	TNL
Ghir_D09G023270	PRGDB00214485	77.3	110	25	0	1	330	871	980	5.6e-46	183.3	MDP0000287433	Putative_R-Genes,_predicted_from_Pythozome	Malus x domestica	CN
Ghir_D09G023990	PRGDB00214485	50.6	468	143	9	547	1731	528	980	6.3e-112	404.8	MDP0000287433	Putative_R-Genes,_predicted_from_Pythozome	Malus x domestica	CN
Ghir_D09G024700	PRGDB00214485	50.6	344	139	1	658	1596	636	979	1.5e-100	366.7	MDP0000287433	Putative_R-Genes,_predicted_from_Pythozome	Malus x domestica	CN
Ghir_D11G010980	PRGDB00215944	61.2	80	27	2	837	1064	1693	1772	2e-21	103.2	MDP0000282838	Putative_R-Genes,_predicted_from_Pythozome	Malus x domestica	CN
Ghir_D08G018450	PRGDB00213184	70.4	135	38	1	456	860	1	133	1e-47	190.7	MDP0000285888	Putative_R-Genes,_predicted_from_Pythozome	Malus x domestica	CNL
Ghir_D08G019030	PRGDB00213184	70.9	134	38	1	548	949	1	133	2.4e-47	189.9	MDP0000285888	Putative_R-Genes,_predicted_from_Pythozome	Malus x domestica	CNL
Ghir_D08G019560	PRGDB00213184	70.4	135	38	1	568	972	1	133	3.8e-47	190.3	MDP0000285888	Putative_R-Genes,_predicted_from_Pythozome	Malus x domestica	CNL
Ghir_D09G001910	PRGDB00213404	52.6	78	36	1	1104	1337	137	213	1.2e-17	91.7	MDP0000386970	Putative_R-Genes,_predicted_from_Pythozome	Malus x domestica	CNL
Ghir_D09G007580	PRGDB00213428	39.7	131	72	3	633	1016	1022	1148	1.5e-19	97.8	MDP0000525273	Putative_R-Genes,_predicted_from_Pythozome	Malus x domestica	CNL
Ghir_D09G012100	PRGDB00213930	41.7	350	170	7	292	1275	1	338	5.7e-59	228.8	MDP0000283542	Putative_R-Genes,_predicted_from_Pythozome	Malus x domestica	CNL
Ghir_D09G018350	PRGDB00214226	41.1	265	99	10	76	780	761	998	1.4e-31	136.3	MDP0000309192	Putative_R-Genes,_predicted_from_Pythozome	Malus x domestica	CNL
Ghir_D09G021140	PRGDB00214355	30.9	152	85	5	754	1185	764	903	6.8e-08	58.9	MDP0000310183	Putative_R-Genes,_predicted_from_Pythozome	Malus x domestica	CNL
Ghir_D10G000790	PRGDB00214578	75.6	78	19	0	198	431	1	78	1.6e-28	128.3	MDP0000311735	Putative_R-Genes,_predicted_from_Pythozome	Malus x domestica	CNL
Ghir_D10G003330	PRGDB00214816	69.7	76	20	2	1265	1492	1	73	1.1e-20	102.1	MDP0000171887	Putative_R-Genes,_predicted_from_Pythozome	Malus x domestica	CNL
Ghir_D10G003910	PRGDB00214816	70.3	74	11	2	913	1104	1	73	2.5e-20	100.1	MDP0000171887	Putative_R-Genes,_predicted_from_Pythozome	Malus x domestica	CNL
Ghir_D11G008310	PRGDB00215703	54.5	66	19	1	558	755	913	967	1e-09	65.1	MDP0000160795	Putative_R-Genes,_predicted_from_Pythozome	Malus x domestica	CNL
Ghir_D11G008910.1	PRGDB00215779	28	311	172	11	2500	3411	780	1045	9.4e-11	69.3	MDP0000304705	Putative_R-Genes,_predicted_from_Pythozome	Malus x domestica	CNL
Ghir_D11G009770	PRGDB00215793	68.9	61	19	0	396	578	985	1045	3.2e-19	96.3	MDP0000281804	Putative_R-Genes,_predicted_from_Pythozome	Malus x domestica	CNL
Ghir_D11G035140.1	PRGDB00216651	83.8	37	6	0	549	659	1256	1292	7.9e-12	71.2	MDP0000230932	Putative_R-Genes,_predicted_from_Pythozome	Malus x domestica	CNL
Ghir_D11G035160.1	PRGDB00216651	62.3	77	25	2	1499	1720	1244	1319	1.7e-18	94.4	MDP0000230932	Putative_R-Genes,_predicted_from_Pythozome	Malus x domestica	CNL
Ghir_D12G023820	PRGDB00217351	55.1	69	30	1	1563	1766	1058	1126	2e-16	89	MDP0000726867	Putative_R-Genes,_predicted_from_Pythozome	Malus x domestica	CNL
Ghir_D08G014070	PRGDB00213011	41.7	72	41	1	2920	3132	61	132	2.1e-06	55.5	MDP0000284931	Putative_R-Genes,_predicted_from_Pythozome	Malus x domestica	N
Ghir_D08G026770	PRGDB00213363	72.7	77	21	0	16	246	1332	1408	4.2e-27	122.5	MDP0000265619	Putative_R-Genes,_predicted_from_Pythozome	Malus x domestica	N
Ghir_D09G001820	PRGDB00213363	39.8	113	68	0	2942	3280	1590	1702	3.2e-19	97.4	MDP0000265619	Putative_R-Genes,_predicted_from_Pythozome	Malus x domestica	N
Ghir_D09G001840.1	PRGDB00213363	44	100	56	0	2887	3186	1603	1702	1.2e-18	95.5	MDP0000265619	Putative_R-Genes,_predicted_from_Pythozome	Malus x domestica	N
Ghir_D09G001850	PRGDB00213363	49.9	1006	387	21	344	3193	762	1706	7.7e-245	847	MDP0000265619	Putative_R-Genes,_predicted_from_Pythozome	Malus x domestica	N
Ghir_D09G001850.1	PRGDB00213363	73.8	80	21	0	2286	2525	1332	1411	3.9e-28	127.1	MDP0000265619	Putative_R-Genes,_predicted_from_Pythozome	Malus x domestica	N
Ghir_D09G016060	PRGDB00214085	61.1	90	35	0	779	1048	249	338	9.7e-26	119	MDP0000194411	Putative_R-Genes,_predicted_from_Pythozome	Malus x domestica	N
Ghir_D11G018540	PRGDB00216316	36.8	38	24	0	1161	1274	107	144	20	30.8	MDP0000248430	Putative_R-Genes,_predicted_from_Pythozome	Malus x domestica	N
Ghir_D11G018770	PRGDB00216316	26.6	350	222	12	148	1179	33	353	1.3e-21	104.4	MDP0000248430	Putative_R-Genes,_predicted_from_Pythozome	Malus x domestica	N
Ghir_D11G020970	PRGDB00216316	29.5	281	179	6	1994	2797	82	356	1.3e-27	125.2	MDP0000248430	Putative_R-Genes,_predicted_from_Pythozome	Malus x domestica	N
Ghir_D11G021190	PRGDB00216316	26.9	331	214	10	229	1203	45	353	7.2e-22	104.8	MDP0000248430	Putative_R-Genes,_predicted_from_Pythozome	Malus x domestica	N
Ghir_D11G031130	PRGDB00216535	62.6	91	31	1	800	1072	71	158	3.5e-23	110.2	MDP0000279752	Putative_R-Genes,_predicted_from_Pythozome	Malus x domestica	N
Ghir_D11G031140	PRGDB00216535	52.4	328	113	10	1171	2055	397	714	3.2e-74	279.6	MDP0000279752	Putative_R-Genes,_predicted_from_Pythozome	Malus x domestica	N
Ghir_D11G031190	PRGDB00216535	58.9	124	46	2	913	1284	71	189	1e-31	138.3	MDP0000279752	Putative_R-Genes,_predicted_from_Pythozome	Malus x domestica	N
Ghir_D11G031260.1	PRGDB00216535	40.7	27	16	0	1603	1683	649	675	4.9	33.1	MDP0000279752	Putative_R-Genes,_predicted_from_Pythozome	Malus x domestica	N
Ghir_D04G015610	PRGDB00213322	62.8	223	82	1	153	821	793	1014	1.7e-79	296.2	MDP0000279719	Putative_R-Genes,_predicted_from_Pythozome	Malus x domestica	NL
Ghir_D08G025390	PRGDB00213322	33.7	323	186	9	67	1002	794	1099	1.8e-44	179.9	MDP0000279719	Putative_R-Genes,_predicted_from_Pythozome	Malus x domestica	NL
Ghir_D08G025950	PRGDB00213322	30.8	224	134	6	214	840	794	1011	2.8e-26	119	MDP0000279719	Putative_R-Genes,_predicted_from_Pythozome	Malus x domestica	NL
Ghir_D08G026000	PRGDB00213322	37.2	317	186	7	4	942	792	1099	1.9e-54	213	MDP0000279719	Putative_R-Genes,_predicted_from_Pythozome	Malus x domestica	NL
Ghir_D09G007920.1	PRGDB00213491	59.3	54	20	2	1671	1829	874	926	4.4e-09	63.2	MDP0000220175	Putative_R-Genes,_predicted_from_Pythozome	Malus x domestica	NL
Ghir_D09G010230	PRGDB00213507	30.1	113	67	1	1101	1439	147	247	2.5e-07	57.8	MDP0000288100	Putative_R-Genes,_predicted_from_Pythozome	Malus x domestica	NL
Ghir_D10G002580.1	PRGDB00214720	38	121	65	3	980	1342	227	337	1.5e-09	64.7	MDP0000281765	Putative_R-Genes,_predicted_from_Pythozome	Malus x domestica	NL
Ghir_D10G006170	PRGDB00215055	43.6	78	38	3	918	1148	758	830	3.8e-09	63.2	MDP0000248164	Putative_R-Genes,_predicted_from_Pythozome	Malus x domestica	NL
Ghir_D10G006170.1	PRGDB00215055	36.5	85	50	3	585	836	746	827	1e-09	64.3	MDP0000248164	Putative_R-Genes,_predicted_from_Pythozome	Malus x domestica	NL
Ghir_D10G007230	PRGDB00215055	36.5	170	74	6	593	1036	758	915	3.2e-16	86.3	MDP0000248164	Putative_R-Genes,_predicted_from_Pythozome	Malus x domestica	NL
Ghir_D11G002320	PRGDB00215326	88.2	34	4	0	980	1081	1670	1703	3.7e-10	66.6	MDP0000285649	Putative_R-Genes,_predicted_from_Pythozome	Malus x domestica	NL
Ghir_D11G002860.1	PRGDB00215326	61.3	357	108	3	202	1269	1478	1805	1e-119	430.3	MDP0000285649	Putative_R-Genes,_predicted_from_Pythozome	Malus x domestica	NL
Ghir_D11G002930	PRGDB00215326	61.9	357	106	3	240	1307	1478	1805	5.8e-121	434.5	MDP0000285649	Putative_R-Genes,_predicted_from_Pythozome	Malus x domestica	NL
Ghir_D11G002930.1	PRGDB00215326	60.2	274	80	2	1686	2504	1560	1805	2.2e-85	317	MDP0000285649	Putative_R-Genes,_predicted_from_Pythozome	Malus x domestica	NL
Ghir_D11G014150	PRGDB00216062	35.7	56	36	0	72	239	2	57	5.6e-06	52	MDP0000255546	Putative_R-Genes,_predicted_from_Pythozome	Malus x domestica	NL
Ghir_D11G014270	PRGDB00216062	49.1	53	27	0	185	343	4	56	9.4e-08	57.8	MDP0000255546	Putative_R-Genes,_predicted_from_Pythozome	Malus x domestica	NL
Ghir_D11G017650	PRGDB00216296	31.6	136	67	5	443	826	542	659	0.00079	45.4	MDP0000292810	Putative_R-Genes,_predicted_from_Pythozome	Malus x domestica	NL
Ghir_D11G017680	PRGDB00216296	31.6	136	67	5	1425	1808	542	659	0.0012	45.4	MDP0000292810	Putative_R-Genes,_predicted_from_Pythozome	Malus x domestica	NL
Ghir_D10G019880	PRGDB00215191	57.7	454	180	7	355	1692	695	1144	2.6e-140	499.2	MDP0000254848	Putative_R-Genes,_predicted_from_Pythozome	Malus x domestica	RLK-GNK2
Ghir_D10G019900	PRGDB00215191	53.4	545	202	8	501	2003	690	1226	2.4e-153	542.7	MDP0000254848	Putative_R-Genes,_predicted_from_Pythozome	Malus x domestica	RLK-GNK2
Ghir_D10G019970	PRGDB00215191	51.1	540	207	8	627	2105	697	1226	2.9e-144	512.7	MDP0000254848	Putative_R-Genes,_predicted_from_Pythozome	Malus x domestica	RLK-GNK2
Ghir_D10G020060	PRGDB00215191	65.7	458	152	3	350	1714	698	1153	8e-175	613.6	MDP0000254848	Putative_R-Genes,_predicted_from_Pythozome	Malus x domestica	RLK-GNK2
Ghir_D08G014980	PRGDB00213048	57.8	102	43	0	494	799	61	162	1.4e-26	121.7	MDP0000693116	Putative_R-Genes,_predicted_from_Pythozome	Malus x domestica	RLP
Ghir_D08G015060	PRGDB00213048	47.1	102	54	0	378	683	61	162	4.5e-20	98.6	MDP0000693116	Putative_R-Genes,_predicted_from_Pythozome	Malus x domestica	RLP
Ghir_D08G019770.1	PRGDB00213195	62.2	37	14	0	634	744	1060	1096	7.5e-06	52	MDP0000487715	Putative_R-Genes,_predicted_from_Pythozome	Malus x domestica	RLP
Ghir_D09G001940	PRGDB00213421	71.2	379	106	1	888	2015	1	379	2.3e-158	559.3	MDP0000280399	Putative_R-Genes,_predicted_from_Pythozome	Malus x domestica	RLP
Ghir_D09G002360	PRGDB00213421	70.1	301	90	0	2126	3028	79	379	6.8e-118	425.2	MDP0000280399	Putative_R-Genes,_predicted_from_Pythozome	Malus x domestica	RLP
Ghir_D09G002380	PRGDB00213421	39.3	117	65	2	1265	1606	129	242	3.7e-15	83.6	MDP0000280399	Putative_R-Genes,_predicted_from_Pythozome	Malus x domestica	RLP
Ghir_D09G002550	PRGDB00213421	33.9	254	142	7	197	898	104	351	1.3e-30	134	MDP0000280399	Putative_R-Genes,_predicted_from_Pythozome	Malus x domestica	RLP
Ghir_D09G005030	PRGDB00213421	40.7	118	64	2	546	890	126	240	4.3e-16	85.9	MDP0000280399	Putative_R-Genes,_predicted_from_Pythozome	Malus x domestica	RLP
Ghir_D09G005030.1	PRGDB00213421	33.9	180	105	4	414	929	131	304	1.1e-18	94.7	MDP0000280399	Putative_R-Genes,_predicted_from_Pythozome	Malus x domestica	RLP
Ghir_D09G005160	PRGDB00213421	70.7	379	108	1	1040	2167	1	379	1.7e-156	553.1	MDP0000280399	Putative_R-Genes,_predicted_from_Pythozome	Malus x domestica	RLP
Ghir_D09G006330.1	PRGDB00213421	54.6	304	122	3	272	1177	86	375	9.8e-89	327	MDP0000280399	Putative_R-Genes,_predicted_from_Pythozome	Malus x domestica	RLP
Ghir_D09G007410	PRGDB00213421	32.6	227	135	5	545	1189	131	351	7.2e-26	118.6	MDP0000280399	Putative_R-Genes,_predicted_from_Pythozome	Malus x domestica	RLP
Ghir_D09G008020	PRGDB00213497	59.7	67	24	1	613	813	107	170	3.2e-12	72.8	MDP0000439417	Putative_R-Genes,_predicted_from_Pythozome	Malus x domestica	RLP
Ghir_D10G022730	PRGDB00215267	28.2	188	131	3	1335	1889	713	899	3.3e-13	76.6	MDP0000256952	Putative_R-Genes,_predicted_from_Pythozome	Malus x domestica	RLP
Ghir_D10G022940.1	PRGDB00215267	39.1	87	50	2	455	709	728	813	2.7e-07	56.2	MDP0000256952	Putative_R-Genes,_predicted_from_Pythozome	Malus x domestica	RLP
Ghir_D10G027210.1	PRGDB00215267	42.1	235	133	3	364	1062	319	552	7.8e-50	198	MDP0000256952	Putative_R-Genes,_predicted_from_Pythozome	Malus x domestica	RLP
Ghir_D11G001690	PRGDB00215267	48	75	38	1	349	570	325	399	8.4e-14	79	MDP0000256952	Putative_R-Genes,_predicted_from_Pythozome	Malus x domestica	RLP
Ghir_D11G001760.2	PRGDB00215267	42.4	66	38	0	1339	1536	340	405	7.1e-06	52.8	MDP0000256952	Putative_R-Genes,_predicted_from_Pythozome	Malus x domestica	RLP
Ghir_D11G001800	PRGDB00215267	42.9	35	20	0	1219	1323	515	549	0.39	36.6	MDP0000256952	Putative_R-Genes,_predicted_from_Pythozome	Malus x domestica	RLP
Ghir_D11G012120	PRGDB00216033	75	204	45	2	1762	2367	1	200	3.3e-85	316.2	MDP0000314577	Putative_R-Genes,_predicted_from_Pythozome	Malus x domestica	RLP
Ghir_D11G013320	PRGDB00216033	71	193	54	1	1525	2103	1	191	1.4e-75	284.3	MDP0000314577	Putative_R-Genes,_predicted_from_Pythozome	Malus x domestica	RLP
Ghir_D11G024990.1	PRGDB00216326	27.5	240	150	7	415	1128	747	964	1.4e-18	94.4	MDP0000255780	Putative_R-Genes,_predicted_from_Pythozome	Malus x domestica	RLP
Ghir_D11G026250	PRGDB00216326	54	826	288	16	260	2539	710	1509	5.2e-231	800.8	MDP0000255780	Putative_R-Genes,_predicted_from_Pythozome	Malus x domestica	RLP
Ghir_D11G028070	PRGDB00216326	56.2	454	168	7	690	2030	702	1131	8.1e-141	501.5	MDP0000255780	Putative_R-Genes,_predicted_from_Pythozome	Malus x domestica	RLP
Ghir_D11G029240	PRGDB00216446	39.4	165	85	3	2226	2702	1111	1266	4.2e-29	130.2	MDP0000196862	Putative_R-Genes,_predicted_from_Pythozome	Malus x domestica	RLP
Ghir_D11G030030.2	PRGDB00216446	44.7	47	26	0	933	1073	915	961	5.3e-08	60.1	MDP0000196862	Putative_R-Genes,_predicted_from_Pythozome	Malus x domestica	RLP
Ghir_D11G033060.1	PRGDB00216650	38.5	338	170	4	319	1317	940	1244	6e-71	268.9	MDP0000252094	Putative_R-Genes,_predicted_from_Pythozome	Malus x domestica	RLP
Ghir_D11G035120	PRGDB00216650	28.5	375	218	10	451	1560	917	1246	1.2e-36	154.5	MDP0000252094	Putative_R-Genes,_predicted_from_Pythozome	Malus x domestica	RLP
Ghir_D11G035120.1	PRGDB00216650	35.1	97	58	2	1239	958	1147	1241	3.7e-12	72.8	MDP0000252094	Putative_R-Genes,_predicted_from_Pythozome	Malus x domestica	RLP
Ghir_D11G036330	PRGDB00216779	43.9	57	32	0	481	651	1103	1159	1.4e-06	54.3	MDP0000600203	Putative_R-Genes,_predicted_from_Pythozome	Malus x domestica	RLP
Ghir_D12G002070	PRGDB00216779	43.9	57	32	0	1966	2136	1103	1159	3.7e-06	54.3	MDP0000600203	Putative_R-Genes,_predicted_from_Pythozome	Malus x domestica	RLP
Ghir_D12G002270	PRGDB00216779	50	76	34	2	1108	1332	1124	1196	1.6e-09	64.3	MDP0000600203	Putative_R-Genes,_predicted_from_Pythozome	Malus x domestica	RLP
Ghir_D12G002490	PRGDB00216779	70.7	58	17	0	2304	2477	1103	1160	2.3e-15	84.7	MDP0000600203	Putative_R-Genes,_predicted_from_Pythozome	Malus x domestica	RLP
Ghir_D12G003480	PRGDB00216779	57.8	45	19	0	2392	2526	1103	1147	3.9e-07	57	MDP0000600203	Putative_R-Genes,_predicted_from_Pythozome	Malus x domestica	RLP
Ghir_D12G005880	PRGDB00216981	29.9	134	89	5	2519	2914	283	413	1.1e-06	55.8	MDP0000297928	Putative_R-Genes,_predicted_from_Pythozome	Malus x domestica	RLP
Ghir_D12G006380	PRGDB00216981	71.9	377	88	2	299	1378	33	408	3e-153	542.7	MDP0000297928	Putative_R-Genes,_predicted_from_Pythozome	Malus x domestica	RLP
Ghir_D12G006440.1	PRGDB00216981	35.9	312	176	8	2159	3034	110	417	9.7e-49	195.7	MDP0000297928	Putative_R-Genes,_predicted_from_Pythozome	Malus x domestica	RLP
Ghir_D12G013100	PRGDB00217072	50.8	325	120	5	348	1307	1122	1411	6.8e-81	302.4	MDP0000261726	Putative_R-Genes,_predicted_from_Pythozome	Malus x domestica	RLP
Ghir_D12G013350	PRGDB00217072	51.9	268	127	1	910	1707	1199	1466	2.5e-73	276.6	MDP0000261726	Putative_R-Genes,_predicted_from_Pythozome	Malus x domestica	RLP
Ghir_D12G015840	PRGDB00217154	53.4	73	32	2	463	678	32	103	4.7e-11	68.9	MDP0000385217	Putative_R-Genes,_predicted_from_Pythozome	Malus x domestica	RLP
Ghir_D12G018120	PRGDB00217154	62.5	56	16	2	353	511	50	103	2.4e-08	60.1	MDP0000385217	Putative_R-Genes,_predicted_from_Pythozome	Malus x domestica	RLP
Ghir_D12G018630	PRGDB00217154	74.4	39	9	1	679	792	50	88	3.2e-07	56.2	MDP0000385217	Putative_R-Genes,_predicted_from_Pythozome	Malus x domestica	RLP
Ghir_D12G019300	PRGDB00217252	27.3	183	125	5	1654	2193	1363	1540	2.6e-11	70.9	MDP0000284128	Putative_R-Genes,_predicted_from_Pythozome	Malus x domestica	RLP
Ghir_D12G020060	PRGDB00217252	61.6	86	33	0	329	586	683	768	1.3e-26	120.9	MDP0000284128	Putative_R-Genes,_predicted_from_Pythozome	Malus x domestica	RLP
Ghir_D12G021760	PRGDB00217252	27.6	163	111	4	1582	2064	1363	1520	1.9e-09	64.7	MDP0000284128	Putative_R-Genes,_predicted_from_Pythozome	Malus x domestica	RLP
Ghir_D12G022740	PRGDB00217252	61.6	86	33	0	355	612	683	768	1.7e-26	120.9	MDP0000284128	Putative_R-Genes,_predicted_from_Pythozome	Malus x domestica	RLP
Ghir_D12G023010	PRGDB00217252	29.6	345	211	7	1298	2278	1249	1579	3e-33	143.7	MDP0000284128	Putative_R-Genes,_predicted_from_Pythozome	Malus x domestica	RLP
Ghir_D12G009730	PRGDB00217051	74.9	223	56	0	929	1597	121	343	6.9e-94	345.1	MDP0000182032	Putative_R-Genes,_predicted_from_Pythozome	Malus x domestica	T
Ghir_A06G015610	PRGDB00215095	36.9	563	303	13	66	1715	4	527	2.1e-90	333.2	MDP0000319352	Putative_R-Genes,_predicted_from_Pythozome	Malus x domestica	TNL
Ghir_D09G019020.1	PRGDB00214233	54.2	83	32	3	499	735	502	582	7.2e-11	68.9	MDP0000301393	Putative_R-Genes,_predicted_from_Pythozome	Malus x domestica	TNL
Ghir_D10G001960	PRGDB00214610	49.5	99	50	0	646	942	1553	1651	8.3e-21	101.3	MDP0000288298	Putative_R-Genes,_predicted_from_Pythozome	Malus x domestica	TNL
Ghir_D10G002020	PRGDB00214610	64.9	265	93	0	1301	2095	143	407	4.9e-94	346.3	MDP0000288298	Putative_R-Genes,_predicted_from_Pythozome	Malus x domestica	TNL
Ghir_D10G002510.1	PRGDB00214610	28.2	142	97	3	664	1089	234	370	3e-06	53.1	MDP0000288298	Putative_R-Genes,_predicted_from_Pythozome	Malus x domestica	TNL
Ghir_D10G010990	PRGDB00215095	27.7	548	353	9	197	1825	18	527	2.7e-48	193.4	MDP0000319352	Putative_R-Genes,_predicted_from_Pythozome	Malus x domestica	TNL
Ghir_D10G011520	PRGDB00215095	28.3	460	295	11	863	2236	117	543	3.3e-42	173.3	MDP0000319352	Putative_R-Genes,_predicted_from_Pythozome	Malus x domestica	TNL
Ghir_D10G011620	PRGDB00215095	29.3	556	339	12	476	2107	15	528	2.3e-51	203.8	MDP0000319352	Putative_R-Genes,_predicted_from_Pythozome	Malus x domestica	TNL
Ghir_D10G011790	PRGDB00215095	26.2	519	329	10	468	1988	29	505	9.5e-41	168.3	MDP0000319352	Putative_R-Genes,_predicted_from_Pythozome	Malus x domestica	TNL
Ghir_D10G012400	PRGDB00215095	30.3	485	287	10	113	1555	22	459	1.7e-46	187.2	MDP0000319352	Putative_R-Genes,_predicted_from_Pythozome	Malus x domestica	TNL
Ghir_D10G012700	PRGDB00215095	36	564	298	11	105	1772	20	528	2.6e-83	309.7	MDP0000319352	Putative_R-Genes,_predicted_from_Pythozome	Malus x domestica	TNL
Ghir_D10G012760	PRGDB00215095	30.8	517	307	11	363	1904	59	527	4.7e-57	222.6	MDP0000319352	Putative_R-Genes,_predicted_from_Pythozome	Malus x domestica	TNL
Ghir_D10G012940	PRGDB00215095	31.7	546	318	11	287	1900	29	527	3.3e-60	233	MDP0000319352	Putative_R-Genes,_predicted_from_Pythozome	Malus x domestica	TNL
Ghir_D10G013590	PRGDB00215095	26.6	512	312	12	223	1701	59	525	5.2e-38	159.1	MDP0000319352	Putative_R-Genes,_predicted_from_Pythozome	Malus x domestica	TNL
Ghir_D11G004550.1	PRGDB00215446	67.1	210	60	2	1539	2147	352	559	1.4e-75	284.3	MDP0000264975	Putative_R-Genes,_predicted_from_Pythozome	Malus x domestica	TNL
Ghir_D11G005080.1	PRGDB00215446	49.2	185	78	3	990	1544	355	523	1.5e-44	180.6	MDP0000264975	Putative_R-Genes,_predicted_from_Pythozome	Malus x domestica	TNL
Ghir_D11G031270	PRGDB00216544	49.4	261	99	2	2016	2798	232	459	1e-56	221.9	MDP0000286805	Putative_R-Genes,_predicted_from_Pythozome	Malus x domestica	TNL
Ghir_D11G031330	PRGDB00216589	33.7	101	49	4	1429	1677	33	133	4.2e-06	53.9	MDP0000272916	Putative_R-Genes,_predicted_from_Pythozome	Malus x domestica	TNL
Ghir_D12G019070.1	PRGDB00217180	41.9	31	18	0	706	798	1428	1458	21	31.2	MDP0000122961	Putative_R-Genes,_predicted_from_Pythozome	Malus x domestica	TNL
Ghir_D12G019080	PRGDB00217180	44.4	27	15	0	1001	1081	1430	1456	25	31.2	MDP0000122961	Putative_R-Genes,_predicted_from_Pythozome	Malus x domestica	TNL
Ghir_D07G013770	PRGDB00206903	35.4	79	49	1	2098	2334	621	697	0.00064	47	LOC_Os02g16090.1	Putative_R-Genes,_predicted_from_Pythozome	Oryza sativa	CN
Ghir_D07G011870	PRGDB00206841	34.8	69	45	0	2	208	340	408	0.0048	42.7	LOC_Os04g53040.1	Putative_R-Genes,_predicted_from_Pythozome	Oryza sativa	NL
Ghir_D07G015400	PRGDB00206941	46.9	81	40	2	359	592	804	884	5.2e-10	65.5	LOC_Os05g17050.1	Putative_R-Genes,_predicted_from_Pythozome	Oryza sativa	RLP
Ghir_D05G002710.1	PRGDB00199494	30.3	142	82	6	268	651	640	778	1.5e-06	53.9	Pavirv00029442m	Putative_R-Genes,_predicted_from_Pythozome	Panicum virgatum	NL
Ghir_D05G003090	PRGDB00199494	37.6	85	52	1	610	864	704	787	3e-09	63.2	Pavirv00029442m	Putative_R-Genes,_predicted_from_Pythozome	Panicum virgatum	NL
Ghir_D05G003360	PRGDB00199494	33.9	112	68	3	2619	2939	668	778	6.3e-09	63.2	Pavirv00029442m	Putative_R-Genes,_predicted_from_Pythozome	Panicum virgatum	NL
Ghir_D04G018790	PRGDB00195657	41.8	938	480	21	128	2902	27	911	8.9e-186	650.6	Phvulv091011975m	Putative_R-Genes,_predicted_from_Pythozome	Phaseolus vulgaris	NL
Ghir_D04G016390.1	PRGDB00195206	38.6	329	194	4	252	1217	30	357	1.6e-62	240.4	Phvulv091022934m	Putative_R-Genes,_predicted_from_Pythozome	Phaseolus vulgaris	RLK-GNK2
Ghir_D05G036310.1	PRGDB00195206	38.6	329	194	4	252	1217	30	357	1.6e-62	240.4	Phvulv091022934m	Putative_R-Genes,_predicted_from_Pythozome	Phaseolus vulgaris	RLK-GNK2
Ghir_D04G018550	PRGDB00195542	65.3	334	114	2	454	1452	472	804	1.3e-124	446.4	Phvulv091020956m	Putative_R-Genes,_predicted_from_Pythozome	Phaseolus vulgaris	RLP
Ghir_D04G017350	PRGDB00195495	34	100	65	1	2489	2785	1319	1418	5.8e-06	53.1	Phvulv091018313m	Putative_R-Genes,_predicted_from_Pythozome	Phaseolus vulgaris	TNL
Ghir_D13G011270	PRGWK00000938	71.9	32	9	0	429	524	557	588	1.4e-06	53.9	Solyc09g064680.1.1	Contributed_R-Genes	Solanum lycopersicum	NL
Ghir_D13G006920	PRGWK00000514	49.2	1001	480	8	248	3172	185	1182	3.6e-259	895.2	Solyc02g072480.1.1	Contributed_R-Genes	Solanum lycopersicum	RLK
Ghir_D13G007390	PRGWK00000584	65.8	275	73	3	1	771	404	675	1.4e-97	355.9	Solyc03g111540.1.1	Contributed_R-Genes	Solanum lycopersicum	RLK-GNK2
Ghir_D13G013050	PRGWK00001094	42.9	84	45	2	837	1085	2	83	1.3e-11	71.6	Solyc12g009740.1.1	Contributed_R-Genes	Solanum lycopersicum	RLP
Ghir_D13G008230	PRGWK00000726	64.5	603	199	7	152	1930	27	624	4.6e-226	784.3	Solyc05g009800.1.1	Contributed_R-Genes	Solanum lycopersicum	RLP-Malectin
Ghir_D13G008240	PRGWK00000726	63.5	603	205	7	149	1927	27	624	2.1e-220	765.4	Solyc05g009800.1.1	Contributed_R-Genes	Solanum lycopersicum	RLP-Malectin
Ghir_D13G025110	PRGWK00002314	59.9	157	55	2	215	679	59	209	4e-46	184.9	Sotub11g029390.1.1	Contributed_R-Genes	Solanum tuberosum	CNL
Ghir_D13G025110.1	PRGWK00002314	53.9	165	64	4	216	707	59	212	6.2e-39	161	Sotub11g029390.1.1	Contributed_R-Genes	Solanum tuberosum	CNL
Ghir_D13G020270	PRGWK00001675	67.9	165	51	2	461	955	84	246	3.9e-57	223	Sotub05g012370.1.1	Contributed_R-Genes	Solanum tuberosum	RLP
Ghir_Scaffold2680G000010	PRGWK00002391	46.9	175	81	3	190	678	73	247	9.8e-31	134.4	Sotub12g019040.1.1	Contributed_R-Genes	Solanum tuberosum	RLP
Ghir_D06G018180	PRGDB00204808	64.6	48	16	1	302	442	1759	1806	3e-06	53.1	GRMZM2G060054_T03	Putative_R-Genes,_predicted_from_Pythozome	Zea mays	CNL
Ghir_D06G018360	PRGDB00204808	71	107	30	1	201	521	1639	1744	3.5e-33	141.7	GRMZM2G060054_T03	Putative_R-Genes,_predicted_from_Pythozome	Zea mays	CNL
Ghir_D06G019420	PRGDB00204808	71.3	101	28	1	270	572	1645	1744	6e-31	134.4	GRMZM2G060054_T03	Putative_R-Genes,_predicted_from_Pythozome	Zea mays	CNL
