# Supplementary material for: Transcriptome Analysis Reveals the Defense Mechanism of Cotton against Verticillium dahliae Induced by Hypovirulent Fungus Gibellulopsis nigrescens CEF08111
Source: Int J Mol Sci. 2023 Jan 12;24(2):1480. doi: 10.3390/ijms24021480 (PMC9863408; doi:10.3390/ijms24021480)
Supplement: Supplementary file 1 [file ijms-24-01480-s001.zip › Table S9.xlsx]

## Sheet: Sheet1
Gene ID	Pathway Name	Level 1	Level 2
Ghir_A04G012440	ko03020//RNA polymerase;ko01100//Metabolic pathways;ko00940//Phenylpropanoid biosynthesis;ko01110//Biosynthesis of secondary metabolites	Genetic Information Processing;Metabolism	Transcription;Biosynthesis of other secondary metabolites;Global and overview maps
Ghir_A10G009150	ko01110//Biosynthesis of secondary metabolites;ko00561//Glycerolipid metabolism;ko00940//Phenylpropanoid biosynthesis;ko00500//Starch and sucrose metabolism;ko00511//Other glycan degradation;ko00460//Cyanoamino acid metabolism;ko01100//Metabolic pathways	Metabolism	Glycan biosynthesis and metabolism;Global and overview maps;Lipid metabolism;Metabolism of other amino acids;Biosynthesis of other secondary metabolites;Carbohydrate metabolism
Ghir_D04G016860	ko01100//Metabolic pathways;ko01110//Biosynthesis of secondary metabolites;ko00940//Phenylpropanoid biosynthesis;ko00130//Ubiquinone and other terpenoid-quinone biosynthesis	Metabolism	Global and overview maps;Biosynthesis of other secondary metabolites;Metabolism of cofactors and vitamins
Ghir_D10G010100	ko00460//Cyanoamino acid metabolism;ko01110//Biosynthesis of secondary metabolites;ko01100//Metabolic pathways;ko00511//Other glycan degradation;ko00561//Glycerolipid metabolism;ko00940//Phenylpropanoid biosynthesis;ko00500//Starch and sucrose metabolism	Metabolism	Glycan biosynthesis and metabolism;Lipid metabolism;Biosynthesis of other secondary metabolites;Carbohydrate metabolism;Metabolism of other amino acids;Global and overview maps
Ghir_A04G012450	ko03020//RNA polymerase;ko01110//Biosynthesis of secondary metabolites;ko00940//Phenylpropanoid biosynthesis;ko01100//Metabolic pathways	Genetic Information Processing;Metabolism	Global and overview maps;Biosynthesis of other secondary metabolites;Transcription
Ghir_D04G016870	ko00940//Phenylpropanoid biosynthesis;ko01100//Metabolic pathways;ko03020//RNA polymerase;ko01110//Biosynthesis of secondary metabolites	Genetic Information Processing;Metabolism	Global and overview maps;Biosynthesis of other secondary metabolites;Transcription
Ghir_D04G016880	ko01110//Biosynthesis of secondary metabolites;ko01100//Metabolic pathways;ko00940//Phenylpropanoid biosynthesis;ko03020//RNA polymerase	Metabolism;Genetic Information Processing	Transcription;Biosynthesis of other secondary metabolites;Global and overview maps
