# Supplementary material for: Transcriptome Analysis Reveals the Defense Mechanism of Cotton against Verticillium dahliae Induced by Hypovirulent Fungus Gibellulopsis nigrescens CEF08111
Source: Int J Mol Sci. 2023 Jan 12;24(2):1480. doi: 10.3390/ijms24021480 (PMC9863408; doi:10.3390/ijms24021480)
Supplement: Supplementary file 1 [file ijms-24-01480-s001.zip › Table S10.xlsx]

## Sheet: Sheet1
Gene ID	Pathway Name	Level 1	Level 2
Ghir_A01G004740	ko04016//MAPK signaling pathway - plant;ko04626//Plant-pathogen interaction	Organismal Systems;Environmental Information Processing	Signal transduction;Environmental adaptation
Ghir_A04G010160	ko04016//MAPK signaling pathway - plant;ko04626//Plant-pathogen interaction	Environmental Information Processing;Organismal Systems	Signal transduction;Environmental adaptation
Ghir_A07G009690.1	ko04626//Plant-pathogen interaction	Organismal Systems	Environmental adaptation
Ghir_A08G020380.1	ko04626//Plant-pathogen interaction	Organismal Systems	Environmental adaptation
Ghir_A11G031940.1	ko04626//Plant-pathogen interaction;ko04016//MAPK signaling pathway - plant	Organismal Systems;Environmental Information Processing	Environmental adaptation;Signal transduction
Ghir_A12G005090	ko04016//MAPK signaling pathway - plant;ko04626//Plant-pathogen interaction	Environmental Information Processing;Organismal Systems	Environmental adaptation;Signal transduction
Ghir_D04G014370	ko04626//Plant-pathogen interaction;ko04016//MAPK signaling pathway - plant	Organismal Systems;Environmental Information Processing	Environmental adaptation;Signal transduction
Ghir_D04G014380	ko04626//Plant-pathogen interaction	Organismal Systems	Environmental adaptation
Ghir_D07G009780	ko04626//Plant-pathogen interaction	Organismal Systems	Environmental adaptation
Ghir_D09G017010.1	ko04626//Plant-pathogen interaction;ko04016//MAPK signaling pathway - plant;ko04141//Protein processing in endoplasmic reticulum	Genetic Information Processing;Organismal Systems;Environmental Information Processing	Signal transduction;Folding, sorting and degradation;Environmental adaptation
Ghir_D12G005050	ko04626//Plant-pathogen interaction	Organismal Systems	Environmental adaptation
Ghir_D13G006260	ko04626//Plant-pathogen interaction	Organismal Systems	Environmental adaptation
