# Supplementary material for: Transcriptome Analysis Reveals the Defense Mechanism of Cotton against Verticillium dahliae Induced by Hypovirulent Fungus Gibellulopsis nigrescens CEF08111
Source: Int J Mol Sci. 2023 Jan 12;24(2):1480. doi: 10.3390/ijms24021480 (PMC9863408; doi:10.3390/ijms24021480)
Supplement: Supplementary file 1 [file ijms-24-01480-s001.zip › Table S11.xlsx]

## Sheet: Sheet1
Gene ID	log2(Gn12/SW12)	Qvalue(SW12-vs-Gn12)	Pvalue(SW12-vs-Gn12)
Ghir_A13G008950	5.20407	8.34395e-14	7.79526e-16
Ghir_D12G003170	4.28657	0.000707894	4.53323e-05
Ghir_A05G028310	4.19408	0.000764334	4.95697e-05
Ghir_D13G010040	4.148	6.36977e-05	3.01419e-06
Ghir_D13G010050	3.96423	2.36581e-09	4.50925e-11
Ghir_D10G015140.1	3.909	0.00265994	0.000208749
Ghir_A12G023330.1	3.83172	0.000360885	2.11959e-05
Ghir_D10G013400	3.76279	0.001172	8.04063e-05
Ghir_D08G004070	3.74977	0.00034322	2.00162e-05
Ghir_A08G003900	3.73598	4.65517e-06	1.71492e-07
Ghir_D04G019960	3.65338	0.00859771	0.000833716
Ghir_D06G001670	3.64836	3.69006e-06	1.33074e-07
Ghir_D01G010790	3.64378	1.4003e-05	5.71666e-07
Ghir_A13G008960	3.58047	9.57091e-07	3.02055e-08
Ghir_A01G010680	3.55557	8.88163e-08	2.24363e-09
Ghir_A06G004750.1	3.4409	0.00287013	0.000228178
Ghir_D06G000320	3.31926	0.00340225	0.00027801
Ghir_D06G010670	3.21757	0.00311164	0.000250922
Ghir_D02G002920	3.19281	0.00483357	0.000416922
Ghir_A01G004950	3.11184	9.55864e-07	3.01545e-08
Ghir_A09G018830	3.06657	0.00501672	0.000435966
Ghir_D01G006570	3.038	9.94674e-05	4.96423e-06
Ghir_D02G023360	3.02334	0.00341279	0.000279092
Ghir_D10G002580.1	3.01625	4.56072e-05	2.0832e-06
Ghir_A08G004810	2.98166	0.00103643	6.98229e-05
Ghir_D02G023370	2.94044	8.72466e-05	4.28884e-06
Ghir_A03G021890	2.9145	0.00329617	0.000268404
Ghir_A08G007740	2.89349	1.37288e-25	3.28645e-28
Ghir_A13G004110	2.88592	0.0042988	0.000364287
Ghir_D06G001500	2.86522	1.38043e-09	2.52393e-11
Ghir_D01G017380	2.85691	0.00107529	7.2839e-05
Ghir_A01G006300	2.84057	0.00146279	0.000104425
Ghir_D08G013920	2.7522	2.8035e-18	1.50183e-20
Ghir_D11G006950.1	2.71837	2.07464e-10	3.30731e-12
Ghir_D13G010030	2.71763	0.000170151	9.06655e-06
Ghir_D13G006530	2.71388	7.69833e-13	8.26792e-15
Ghir_D01G009130	2.70493	4.81701e-05	2.2146e-06
Ghir_D13G004250	2.70276	0.00154625	0.000111564
Ghir_D13G020270	2.6952	1.07281e-07	2.77913e-09
Ghir_D05G007790	2.65854	0.00538337	0.000474585
Ghir_A11G023030	2.65851	0.0018918	0.000141196
Ghir_A11G004350	2.62943	0.00316779	0.000256188
Ghir_A06G003340	2.59232	1.6624e-05	6.92435e-07
Ghir_D09G011480	2.58879	1.14768e-09	2.0776e-11
Ghir_A12G020510	2.56336	0.00174207	0.000128172
Ghir_A06G010300	2.5612	0.00207834	0.000157136
BGI_novel_G000341	2.55998	0.00506069	0.000440114
Ghir_A13G012770	2.55252	0.00895358	0.000875639
Ghir_D04G001660	2.5388	1.64553e-05	6.84554e-07
Ghir_D08G026000	2.49149	5.87904e-07	1.77705e-08
Ghir_D11G008390	2.4664	0.00117866	8.1e-05
Ghir_D07G018130.1	2.42824	1.29343e-07	3.40754e-09
Ghir_A13G019530	2.41208	1.97978e-06	6.69646e-08
Ghir_D01G011690	2.38164	2.69339e-05	1.16916e-06
Ghir_D09G003570	2.37261	0.00202808	0.000152769
Ghir_A01G008680	2.36517	2.4272e-05	1.04554e-06
Ghir_D01G013750.1	2.33175	0.00261678	0.000204787
Ghir_D13G013430	2.32825	0.00659187	0.000603728
Ghir_D06G010860.1	2.3131	2.7137e-06	9.49138e-08
Ghir_A09G003640	2.28625	3.0825e-06	1.09448e-07
Ghir_D03G018560	2.28459	3.16066e-10	5.18174e-12
Ghir_A03G004200	2.25711	3.27512e-10	5.39906e-12
Ghir_A12G010870	2.25482	8.75077e-06	3.40827e-07
Ghir_D06G010860	2.22496	1.77504e-07	4.7797e-09
Ghir_A05G041300	2.18344	0.00131853	9.22221e-05
Ghir_D07G021520	2.16418	0.00122741	8.49224e-05
Ghir_D02G004320	2.16004	1.29314e-05	5.23067e-07
Ghir_A10G001790	2.14811	2.11982e-10	3.38757e-12
Ghir_A10G012620	2.11716	3.87424e-08	9.15898e-10
Ghir_A03G004200.1	2.0704	7.18922e-08	1.79075e-09
Ghir_D07G024880	2.06589	2.45204e-21	8.94743e-24
Ghir_A05G016340.7	2.06293	0.000160063	8.4648e-06
Ghir_A05G026700	2.05588	1.3741e-13	1.34419e-15
Ghir_A06G001640	2.04257	2.41434e-07	6.70736e-09
Ghir_D12G006670	2.04086	0.000190499	1.03283e-05
Ghir_D10G015140	2.0065	3.28228e-06	1.17009e-07
Ghir_A09G011940	2.00572	8.60751e-07	2.69646e-08
Ghir_A08G025090	2.00179	4.13e-07	1.20936e-08
Ghir_A10G011300	-2.02576	2.36581e-09	4.50815e-11
Ghir_D11G008610	-2.07704	0.00030525	1.75293e-05
Ghir_A11G005170	-2.08379	8.33457e-07	2.60449e-08
Ghir_D07G010780	-2.14851	1.069e-06	3.40693e-08
Ghir_A02G007100	-2.15537	0.000182925	9.86085e-06
Ghir_D05G028870	-2.16283	0.00013924	7.21768e-06
Ghir_D05G002260	-2.17588	0.00135144	9.49727e-05
Ghir_D13G000440	-2.25031	0.00116264	7.96889e-05
Ghir_A02G007100.1	-2.28126	3.43352e-25	8.70798e-28
Ghir_D04G000290	-2.28844	2.35644e-17	1.41785e-19
Ghir_D08G017940	-2.33339	2.0936e-12	2.45439e-14
Ghir_D07G010780.1	-2.33349	8.09114e-09	1.70341e-10
Ghir_A02G008140	-2.37451	2.95545e-18	1.58706e-20
Ghir_A07G010720	-2.38107	6.34117e-07	1.92987e-08
Ghir_A13G006610.1	-2.42522	1.17615e-08	2.54003e-10
Ghir_D12G017650	-2.45289	4.13166e-07	1.21038e-08
Ghir_A05G017990	-2.45524	0.00924919	0.000911611
Ghir_D10G006170.1	-2.47836	0.00115325	7.89409e-05
Ghir_D12G019300	-2.51157	3.59883e-09	7.14346e-11
Ghir_A12G023110	-2.53982	0.00669565	0.000615139
Ghir_D09G004630	-2.62978	1.24028e-12	1.39785e-14
Ghir_A10G005330	-2.65279	7.98211e-08	2.00374e-09
Ghir_A13G021450	-2.67383	0.00541514	0.000477597
Ghir_A02G001220.1	-2.6937	3.60359e-12	4.41577e-14
Ghir_D08G014230.4	-2.77395	6.78477e-06	2.58548e-07
Ghir_D08G026770	-2.78265	0.0031241	0.000252048
Ghir_D02G001350.1	-2.81902	3.41652e-09	6.73736e-11
Ghir_D02G008520	-2.85694	1.62317e-08	3.58915e-10
Ghir_A08G010800	-2.86115	8.61753e-06	3.35303e-07
Ghir_D02G007540.1	-2.87118	4.21446e-26	9.27071e-29
Ghir_D01G006680	-2.96783	0.000555381	3.44516e-05
Ghir_A01G006390	-2.9934	1.88809e-05	7.94747e-07
Ghir_A13G000270	-3.02613	4.95919e-08	1.19689e-09
Ghir_D08G011290	-3.04104	2.88155e-09	5.60784e-11
Ghir_D01G020910	-3.05377	3.398e-10	5.62361e-12
Ghir_D01G008140	-3.07772	1.82865e-08	4.06515e-10
Ghir_D09G001320	-3.09293	1.85029e-13	1.84593e-15
Ghir_A13G014890	-3.14378	7.09799e-06	2.72138e-07
BGI_novel_G000320	-3.14545	8.99301e-14	8.43655e-16
Ghir_D02G001350	-3.15588	3.48725e-09	6.8949e-11
Ghir_D10G006170	-3.20783	0.00028594	1.62724e-05
Ghir_D05G000380	-3.22598	8.40779e-07	2.62954e-08
Ghir_D13G015580	-3.23677	7.95666e-15	6.58919e-17
Ghir_A08G013420	-3.26519	9.01198e-26	2.11067e-28
Ghir_A08G002860	-3.31837	2.57869e-07	7.22068e-09
Ghir_A10G017280	-3.34347	1.73439e-15	1.33532e-17
Ghir_D08G002940	-3.35908	1.13653e-11	1.51327e-13
Ghir_A13G006610	-3.36515	7.33961e-08	1.83477e-09
Ghir_D02G001290.1	-3.43242	1.76003e-14	1.50765e-16
Ghir_A01G017190	-3.45084	0.00029665	1.69548e-05
Ghir_A02G005340	-3.45986	6.23247e-06	2.35405e-07
BGI_novel_G005734	-3.48913	9.89348e-09	2.10973e-10
Ghir_A09G004210	-3.58025	5.91789e-12	7.51969e-14
Ghir_A05G015200	-3.5881	0.00541393	0.00047742
Ghir_A13G006620	-3.61815	1.09721e-13	1.04352e-15
Ghir_A02G008140.1	-3.70007	8.23414e-13	8.87534e-15
Ghir_D02G013040	-3.74134	3.41351e-07	9.82329e-09
Ghir_A03G011530	-3.81208	9.22478e-14	8.67226e-16
Ghir_D02G005670	-3.84248	1.57312e-06	5.21509e-08
Ghir_D10G018750	-3.92617	6.65993e-15	5.47224e-17
Ghir_A08G006730	-4.02996	0.000355172	2.08419e-05
Ghir_A13G004280	-4.0468	0.000181597	9.78218e-06
Ghir_D12G027610	-4.05901	0.0024094	0.000185969
Ghir_A05G032460	-4.12785	0.00075818	4.90725e-05
Ghir_D08G009090	-4.35113	5.33883e-05	2.47937e-06
Ghir_D08G006850	-4.45797	1.21675e-07	3.18506e-09
Ghir_A05G000640	-4.62124	0.000171385	9.13895e-06
Ghir_D09G014310.1	-4.84915	2.93533e-05	1.28569e-06
Ghir_D13G005660	-5.06738	2.62276e-10	4.24218e-12
Ghir_A08G002820	-5.22123	1.36961e-13	1.33803e-15
Ghir_Scaffold2662G000010	-5.48361	4.98244e-13	5.22859e-15
BGI_novel_G005299	-5.68034	1.04094e-07	2.68309e-09
BGI_novel_G000323	-7.1295	7.67265e-14	7.13234e-16
Ghir_A02G009660	-7.82933	3.61243e-24	1.01433e-26
Ghir_D03G005180.1	-8.85212	8.44805e-25	2.21909e-27
Ghir_Scaffold2662G000010.1	-9.6129	8.35942e-61	2.37969e-64
