# Supplementary material for: Transcriptome Analysis Reveals the Defense Mechanism of Cotton against Verticillium dahliae Induced by Hypovirulent Fungus Gibellulopsis nigrescens CEF08111
Source: Int J Mol Sci. 2023 Jan 12;24(2):1480. doi: 10.3390/ijms24021480 (PMC9863408; doi:10.3390/ijms24021480)
Supplement: Supplementary file 1 [file ijms-24-01480-s001.zip › Table S12.xlsx]

## Sheet: Sheet1
Table S12 Specific primer sequences used for RTqPCR
Gene name	Primer sequence (5′→3′)
A01G021450.1	F:TGTTCGAGACGACTTCAGGC	R:AGCAGCGGTAACATCAGCTT
A04G013330.1	F:GGGCGATGATGCTGGTCTTA	R:TGTGGGTCTAAGCCACTGGT
A07G002060	F:AGCCAAAGCTCAAGCATCCA	R:ATTTTGGCTTTCGTAGCCCG
D02G007820.1	F:AGTTCATTGCCGTTGGTTGC	R:CCGCTTTCTCGCAATATGCC
D02G018040.1	F:AGCTATGAACGTTGCGCTCT	R:TTAAGGGGGCTGCAAACACA
D04G015080.1	F:GAAAAGCTCGATTCGCGTCC	R:AGGCATGAACTCAACGCTCT
D05G015010.1	F:TTCACCGTCGGCTCTTTTCA	R:ACGCTTCTGGTCTTTGGAGG
D05G019060.1	F:AGGCCACACCTATGCAAGAG	R:AGCATAGCAGGGGCACATTT
D10G019220.1	F:GCCGACATCGGAGCTAAAGA	R:GGGGATAGGGCTGGTATCGT
D11G016950.1	F:TGGGGGCATGGATCTCAGTA	R:TGGGTGATCGATGTTGTGCT
D12G000390.1	F:CAGTCAGGTTGTACCAGCGT	R:TCGAAAGCTGAGAGCAGCAA
D12G021740.1	F:GGTCTGACTTCACTCGCCAA	R:TAAGGAGTTCTGCCATCGCC
ubiquitin	F: GAGTCTTCGGACACCATTG;	R: CTTGACCTTCTTCTTCTTGTGC
