# Supplementary material for: Transcriptome Analysis Reveals the Defense Mechanism of Cotton against Verticillium dahliae Induced by Hypovirulent Fungus Gibellulopsis nigrescens CEF08111
Source: Int J Mol Sci. 2023 Jan 12;24(2):1480. doi: 10.3390/ijms24021480 (PMC9863408; doi:10.3390/ijms24021480)
Supplement: Supplementary file 1 [file ijms-24-01480-s001.zip › Table S13. gene expression.xlsx]

## Sheet: Sheet1
Gh_A01G021450.1 gene
sample	ubiquitin gene	Gh_A01G021450.1		ubiquitin gene	Mean1	Mean2	Mean3		ΔCT	reapet1	reapet2	reapet3		2-ΔCT	reapet1	reapet2	reapet3	Mean
Gn3-1	26.63	26.67		Gn3	26.85	26.97	26.7433		Gn3	0.02	0.0633333	-0.0766667		Gn3	0.986233	0.95705	1.05458	0.999287
	27.01	26.93		Vd3	25.4533	25.47	25.2867		Vd3	0.593333	0.796667	0.546667		Vd3	0.66281	0.575678	0.6846	0.641029
	26.91	27.01		SW3	23.8133	23.9567	23.57		SW3	0.773333	0.71	0.896667		SW3	0.585064	0.61132	0.537126	0.577837
Gn3-2	26.65	26.8
	27.06	27		Gh_A01G021450.1	Mean1	Mean2	Mean3							Ghir_A01G021450.1	Gn3	Vd3	SW3
	27.2	27.3		Gn3	26.87	27.0333	26.6667							RNA-seq	1.03667	0.0133333	0.02
Gn3-3	26.62	26.4		Vd3	26.0467	26.2667	25.8333							RTqPCR	0.999287	0.641029	0.577837
	26.94	26.7		SW3	24.5867	24.6667	24.4667
	26.67	26.9
Vd3-1	25.53	26.05
	25.3	26.04
	25.53	26.05
Vd3-2	25.56	26.2
	25.31	26.3
	25.54	26.3
Vd3-3	25.35	25.8
	25.07	25.9
	25.44	25.8
SW3-1	23.82	24.56
	23.75	24.72
	23.87	24.48
SW3-2	24.03	24.7
	23.89	24.7
	23.95	24.6
SW3-3	23.55	24.3
	23.54	24.6
	23.62	24.5

## Sheet: Sheet2
Gh_A04G013330.1 gene
sample	ubiquitin gene	Gh_A04G013330.1		ubiquitin gene	Mean1	Mean2	Mean3		ΔCT	reapet1	reapet2	reapet3		2-ΔCT	reapet1	reapet2	reapet3	Mean
Gn3-1	26.63	30.04		Gn3	26.85	26.97	26.7433		Gn3	3.06667	3.11	3.24667		Gn3	0.119355	0.115824	0.105355	0.113511
	27.01	29.86		Vd3	25.4533	25.47	25.2867		Vd3	3.35667	3.50667	3.68667		Vd3	0.0976209	0.0879808	0.077661	0.0877542
	26.91	29.85		SW3	23.8133	23.9567	23.57		SW3	5.64	5.69667	6.02333		SW3	0.0200535	0.0192811	0.0153743	0.0182363
Gn3-2	26.65	30.2
	27.06	29.91		Gh_A04G013330.1	Mean1	Mean2	Mean3							Gh_A04G013330.1	Gn3	Vd3	SW3
	27.2	30.13		Gn3	29.9167	30.08	29.99							RNA-seq	3.25333	0.12	0.0233333
Gn3-3	26.62	30.05		Vd3	28.81	28.9767	28.9733							RTqPCR	0.113511	0.0877542	0.0182363
	26.94	29.92		SW3	29.4533	29.6533	29.5933
	26.67	30
Vd3-1	25.53	28.84
	25.3	28.72
	25.53	28.87
Vd3-2	25.56	29.03
	25.31	28.84
	25.54	29.06
Vd3-3	25.35	28.85
	25.07	28.96
	25.44	29.11
SW3-1	23.82	29.77
	23.75	29.11
	23.87	29.48
SW3-2	24.03	29.8
	23.89	29.4
	23.95	29.76
SW3-3	23.55	29.82
	23.54	29.31
	23.62	29.65

## Sheet: Sheet3
Gh_A07G002060 gene
sample	ubiquitin gene	Gh_A07G002060		ubiquitin gene	Mean1	Mean2	Mean3		ΔCT	reapet1	reapet2	reapet3		2-ΔCT	reapet1	reapet2	reapet3	Mean
Gn12-1	25.31	28.04		Gn3	25.42	25.1833	25.49		Gn3	2.63333	3.02	2.7		Gn3	0.161171	0.123279	0.153893	0.146114
	25.5	28.01		Vd3	23.7233	23.6133	23.7867		Vd3	10.3	10.5533	10.35		Vd3	0.000793215	0.000665472	0.000766195	0.000741628
	25.45	28.11		SW3	26.7633	26.5967	26.88		SW3	9.23667	9.65	9.24		SW3	0.00165762	0.00124469	0.0016538	0.0015187
Gn12-2	25.05	28.19
	25.32	28.3		Gh_A07G002060	Mean1	Mean2	Mean3							Gh_A07G002060	Gn12	Vd12	SW12
	25.18	28.12		Gn3	28.0533	28.2033	28.19							RNA-seq	9.58	0.306667	0.0466667
Gn12-3	25.36	28.32		Vd3	34.0233	34.1667	34.1367							RTqPCR	0.146114	0.000741628	0.0015187
	25.59	28.04		SW3	36	36.2467	36.12
	25.52	28.21
Vd12-1	23.68	34
	23.72	34
	23.77	34.07
Vd12-2	23.5	34.04
	23.68	34.18
	23.66	34.28
Vd12-3	23.68	34.09
	23.77	34.17
	23.91	34.15
SW12-1	26.66	36
	26.93	36
	26.7	36
SW12-2	26.47	36.3
	26.74	36.24
	26.58	36.2
SW12-3	26.75	36.28
	27.02	36.01
	26.87	36.07

## Sheet: Sheet4
Gh_D11G016950.1 gene
sample	ubiquitin gene	Gh_D11G016950.1		ubiquitin gene	Mean1	Mean2	Mean3		ΔCT	reapet1	reapet2	reapet3		2-ΔCT	reapet1	reapet2	reapet3	Mean
Gn12-1	25.31	27.89		Gn3	25.42	25.1833	25.49		Gn3	2.21	2.62667	2.31333		Gn3	0.216134	0.161918	0.201195	0.193082
	25.5	27.68		Vd3	23.7233	23.6133	23.7867		Vd3	3.47	3.72333	3.55		Vd3	0.0902456	0.075712	0.0853775	0.0837784
	25.45	27.32		SW3	26.7633	26.5967	26.88		SW3	4.35	4.64333	4.42667		SW3	0.0490365	0.0400145	0.0464987	0.0451832
Gn12-2	25.05	28.01
	25.32	27.83		Gh_D11G016950.1	Mean1	Mean2	Mean3							Gh_D11G016950.1	Gn12	Vd12	SW12
	25.18	27.59		Gn3	27.63	27.81	27.8033							RNA-seq	3.72667	0.85	0
Gn12-3	25.36	28.12		Vd3	27.1933	27.3367	27.3367							RTqPCR	0.193082	0.0837784	0.0451832
	25.59	27.89		SW3	31.1133	31.24	31.3067
	25.52	27.4
Vd12-1	23.68	27.22
	23.72	26.9
	23.77	27.46
Vd12-2	23.5	27.4
	23.68	27.06
	23.66	27.55
Vd12-3	23.68	27.5
	23.77	26.93
	23.91	27.58
SW12-1	26.66	31.35
	26.93	30.87
	26.7	31.12
SW12-2	26.47	31.48
	26.74	30.89
	26.58	31.35
SW12-3	26.75	31.59
	27.02	30.97
	26.87	31.36

## Sheet: Sheet5
Gh_D02G007820.1 gene
sample	ubiquitin gene	Gh_D02G007820.1		ubiquitin gene	Mean1	Mean2	Mean3		ΔCT	reapet1	reapet2	reapet3		2-ΔCT	reapet1	reapet2	reapet3	Mean
Gn48-1	24.12	26.16		Gn3	23.9967	23.9333	24.1433		Gn3	2.08	2.19	2.07667		Gn3	0.236514	0.219151	0.237062	0.230909
	23.96	26.16		Vd3	23.3467	23.2167	23.4967		Vd3	4.27667	4.54	4.36333		Vd3	0.0515935	0.0429857	0.0485854	0.0477215
	23.91	25.91		SW3	24.5133	24.2733	24.68		SW3	3.34667	3.67333	3.36667		SW3	0.0982999	0.078382	0.0969465	0.0912095
Gn48-2	24.11	26.16
	23.93	26.24		Gh_D02G007820.1	Mean1	Mean2	Mean3							Gh_D02G007820.1	Gn48	Vd48	SW48
	23.76	25.97		Gn3	26.0767	26.1233	26.22							RNA-seq	2.76667	0.15	0.0933333
Gn48-3	24.34	26.45		Vd3	27.6233	27.7567	27.86							RTqPCR	0.230909	0.0477215	0.0912095
	24.08	26.16		SW3	27.86	27.9467	28.0467
	24.01	26.05
Vd48-1	23.23	28.14
	23.41	27.51
	23.4	27.22
Vd48-2	23.2	28.35
	23.18	27.62
	23.27	27.3
Vd48-3	23.36	28.36
	23.44	27.76
	23.69	27.46
SW48-1	24.43	28.02
	24.61	28.02
	24.5	27.54
SW48-2	24.17	28.05
	24.38	28.17
	24.27	27.62
SW48-3	24.56	28.24
	24.88	28.17
	24.6	27.73

## Sheet: Sheet6
Gh_D02G018040.1 gene
sample	ubiquitin gene	Gh_D02G018040.1		ubiquitin gene	Mean1	Mean2	Mean3		ΔCT	reapet1	reapet2	reapet3		2-ΔCT	reapet1	reapet2	reapet3	Mean
Gn3-1	26.39	32		Gn3	26.64	26.7533	26.94		Gn3	5.89	5.90667	5.66333		Gn3	0.0168629	0.0166693	0.0197318	0.0177547
	26.75	32.84		Vd3	25.3033	25.2567	25.7		Vd3	4.43667	4.63	4.14		Vd3	0.0461775	0.040386	0.0567199	0.0477612
	26.78	32.75		SW3	23.6733	23.58	23.91		SW3	7.71667	7.97333	7.59		SW3	0.00475392	0.00397912	0.00519018	0.00464107
Gn3-2	26.45	32.15
	26.96	32.99		Gh_D02G018040.1	Mean1	Mean2	Mean3							Gh_D02G018040.1	Gn3	Vd3	SW3
	26.85	32.84		Gn3	32.53	32.66	32.6033							RNA-seq	9.27667	0	0
Gn3-3	26.75	32.08		Vd3	29.74	29.8867	29.84							RTqPCR	0.0177547	0.0477612	0.00464107
	27.11	32.87		SW3	31.39	31.5533	31.5
	26.96	32.86
Vd3-1	25.41	29.49
	25.01	29.95
	25.49	29.78
Vd3-2	25.49	29.63
	25	30.14
	25.28	29.89
Vd3-3	25.81	29.56
	25.48	30
	25.81	29.96
SW3-1	23.76	31.9
	23.5	31.1
	23.76	31.17
SW3-2	23.56	32.02
	23.46	31.25
	23.72	31.39
SW3-3	23.9	31.9
	23.83	31.22
	24	31.38

## Sheet: Sheet7
Gh_D04G015080.1 gene
sample	ubiquitin gene	Gh_D04G015080.1		ubiquitin gene	Mean1	Mean2	Mean3		ΔCT	reapet1	reapet2	reapet3		2-ΔCT	reapet1	reapet2	reapet3	Mean
Gn3-1	26.39	25.79		Gn3	26.64	26.7533	26.94		Gn3	-0.893333	-0.816667	-0.98		Gn3	1.85746	1.76133	1.97247	1.86375
	26.75	25.67		Vd3	25.3033	25.2567	25.7		Vd3	-0.473333	-0.28	-0.626667		Vd3	1.38831	1.21419	1.54399	1.38217
	26.78	25.78		SW3	23.6733	23.58	23.91		SW3	1.05667	1.31	1.00667		SW3	0.480742	0.403321	0.497695	0.460586
Gn3-2	26.45	25.84
	26.96	25.89		Gh_D04G015080.1	Mean1	Mean2	Mean3							Gh_D04G015080.1	Gn3	Vd3	SW3
	26.85	26.08		Gn3	25.7467	25.9367	25.96							RNA-seq	12.0467	0.52	0.21
Gn3-3	26.75	26		Vd3	24.83	24.9767	25.0733							RTqPCR	1.86375	1.38217	0.460586
	27.11	25.84		SW3	24.73	24.89	24.9167
	26.96	26.04
Vd3-1	25.41	24.83
	25.01	24.91
	25.49	24.75
Vd3-2	25.49	25.01
	25	25.16
	25.28	24.76
Vd3-3	25.81	25.12
	25.48	25.14
	25.81	24.96
SW3-1	23.76	24.85
	23.5	24.75
	23.76	24.59
SW3-2	23.56	25
	23.46	24.91
	23.72	24.76
SW3-3	23.9	25.08
	23.83	24.95
	24	24.72

## Sheet: Sheet8
Gh_D05G015010.1 gene
sample	ubiquitin gene	Gh_D05G015010.1		ubiquitin gene	Mean1	Mean2	Mean3		ΔCT	reapet1	reapet2	reapet3		2-ΔCT	reapet1	reapet2	reapet3	Mean
Gn3-1	26.19	25.82		Gn3	26.4733	26.4333	26.81		Gn3	-0.63	-0.373333	-0.796667		Gn3	1.54756	1.29534	1.73708	1.52666
	26.53	25.83		Vd3	25.1967	25.0367	25.4867		Vd3	3.91667	4.22	3.76667		Vd3	0.0662164	0.0536603	0.0734717	0.0644495
	26.7	25.88		SW3	23.5467	23.5033	23.8267		SW3	2.82333	2.99667	2.62		SW3	0.141284	0.125289	0.162668	0.14308
Gn3-2	26.22	26.06
	26.55	26.11		Gh_D05G015010.1	Mean1	Mean2	Mean3							Gh_D05G015010.1	Gn3	Vd3	SW3
	26.53	26.01		Gn3	25.8433	26.06	26.0133							RNA-seq	9.91333	1.09667	0.393333
Gn3-3	26.6	26.03		Vd3	29.1133	29.2567	29.2533							RTqPCR	1.52666	0.0644495	0.14308
	26.77	25.86		SW3	26.37	26.5	26.4467
	27.06	26.15
Vd3-1	25.37	29.34
	24.75	28.54
	25.47	29.46
Vd3-2	25.11	29.44
	24.76	28.62
	25.24	29.71
Vd3-3	25.61	29.46
	25.15	28.82
	25.7	29.48
SW3-1	23.5	26.7
	23.48	26.28
	23.66	26.13
SW3-2	23.56	26.83
	23.3	26.32
	23.65	26.35
SW3-3	23.83	26.78
	23.63	26.29
	24.02	26.27

## Sheet: Sheet9
Gh_D05G019060.1 gene
sample	ubiquitin gene	Gh_D05G019060.1		ubiquitin gene	Mean1	Mean2	Mean3		ΔCT	reapet1	reapet2	reapet3		2-ΔCT	reapet1	reapet2	reapet3	Mean
Gn3-1	26.19	21.62		Gn3	26.4733	26.4333	26.81		Gn3	-4.82	-4.54667	-5.01667		Gn3	28.2465	23.3713	32.3718	27.9965
	26.53	21.68		Vd3	25.1967	25.0367	25.4867		Vd3	-0.16	0.216667	-0.36		Vd3	1.11729	0.860551	1.28343	1.08709
	26.7	21.66		SW3	23.5467	23.5033	23.8267		SW3	0.0933333	0.286667	-0.00333333		SW3	0.937354	0.819794	1.00231	0.919821
Gn3-2	26.22	21.84
	26.55	21.88		Gh_D05G019060.1	Mean1	Mean2	Mean3							Gh_D05G019060.1	Gn3	Vd3	SW3
	26.53	21.94		Gn3	21.6533	21.8867	21.7933							RNA-seq	665.887	86.6	16.1033
Gn3-3	26.6	21.7		Vd3	25.0367	25.2533	25.1267							RTqPCR	27.9965	1.08709	0.919821
	26.77	21.83		SW3	23.64	23.79	23.8233
	27.06	21.85
Vd3-1	25.37	25.02
	24.75	25.05
	25.47	25.04
Vd3-2	25.11	25.18
	24.76	25.26
	25.24	25.32
Vd3-3	25.61	25.03
	25.15	25.28
	25.7	25.07
SW3-1	23.5	23.63
	23.48	23.66
	23.66	23.63
SW3-2	23.56	23.86
	23.3	23.72
	23.65	23.79
SW3-3	23.83	23.78
	23.63	23.87
	24.02	23.82

## Sheet: Sheet10
Gh_D10G019220.1 gene
sample	ubiquitin gene	Gh_D10G019220.1		ubiquitin gene	Mean1	Mean2	Mean3		ΔCT	reapet1	reapet2	reapet3		2-ΔCT	reapet1	reapet2	reapet3	Mean
Gn3-1	26.13	24.85		Gn3	26.33	26.29	26.7467		Gn3	-1.63	-1.49	-1.86		Gn3	3.09513	2.80889	3.63008	3.17803
	26.25	24.68		Vd3	25.06	25.0733	25.2167		Vd3	4.96333	4.99333	4.91667		Vd3	0.0320544	0.0313947	0.0331082	0.0321858
	26.61	24.57		SW3	23.3933	23.4167	23.7		SW3	3.11333	3.22667	2.94		SW3	0.115556	0.106826	0.130308	0.117563
Gn3-2	26.02	25.01
	26.28	24.7		Gh_D10G019220.1	Mean1	Mean2	Mean3							Gh_D10G019220.1	Gn3	Vd3	SW3
	26.57	24.69		Gn3	24.7	24.8	24.8867							RNA-seq	48.5867	0.0533333	0
Gn3-3	26.45	25.03		Vd3	30.0233	30.0667	30.1333							RTqPCR	3.17803	0.0321858	0.117563
	26.83	24.77		SW3	26.5067	26.6433	26.64
	26.96	24.86
Vd3-1	25.22	30.12
	24.61	30.22
	25.35	29.73
Vd3-2	25.29	30.17
	24.52	30.25
	25.41	29.78
Vd3-3	25.37	30.21
	24.78	30.27
	25.5	29.92
SW3-1	23.39	26.1
	23.3	26.46
	23.49	26.96
SW3-2	23.32	26.36
	23.34	26.48
	23.59	27.09
SW3-3	23.71	26.18
	23.58	26.54
	23.81	27.2

[truncated: 2 more sheets: Sheet11, Sheet12]
